# Supplementary material for: Increased brain volume from higher cereal and lower coffee intake: Shared genetic determinants and impacts on cognition and metabolism
Source: bioRxiv or medRxiv preprint supplement (doi:10.1101/2020.10.11.20210781), 2021-08-24
Supplement: Supplementary file [file media-1.pdf]

## **Supplementary Information for**

### **Increased brain volume from higher cereal and lower coffee intake: Shared genetic determinants and impacts on cognition and metabolism**

Jujiao Kang MSc <sup>1,2,3†</sup>, Tianye Jia PhD <sup>2,3,4†\*</sup>, Zeyu Jiao MSc <sup>1,2,3</sup>, Chun Shen PhD <sup>2,3</sup>, Chao Xie MSc <sup>2,3</sup>, Wei Cheng PhD <sup>2,3</sup>, Barbara J Sahakian DSc <sup>2,3,5,6\*</sup>, David Waxman PhD <sup>2,3</sup>, Jianfeng Feng PhD <sup>1,2,3,7,8\*</sup>

Correspondence to: [jianfeng64@gmail.com](mailto:jianfeng64@gmail.com) or [tianyejia@fudan.edu.cn](mailto:tianyejia@fudan.edu.cn) or [bjs1001@medschl.cam.ac.uk](mailto:bjs1001@medschl.cam.ac.uk)

† These authors contributed equally to this work.

#### **This PDF file includes:**

Supplementary Methods  
Supplementary Figure  
Table S1 to S23

## Supplementary Methods

### Assessment of diet

Dietary data were obtained from the touchscreen questionnaire at the baseline and the MRI scan appointment. Participants were asked about their frequency of intake of a range of common food and drink items [UK Biobank Category ID: 100052]. The questionnaires were described as below.

Cereal intake was obtained from the touchscreen questionnaire. Participants were asked, "How many bowls of cereal do you eat a week?" Either answer  $< 0$  or  $> 99$  was then rejected. If answer  $> 14$ , then the participant was asked to confirm. Participants who indicated that they ate cereal at least one bowl of cereal each week were further asked, "What type of cereal do you mainly eat?"

The answers included Bran cereal (e.g., All Bran, Branflakes), Biscuit cereal (e.g., Weetabix), Oat cereal (e.g., Ready Brek, porridge), Muesli, and Other (e.g., Cornflakes, Frosties). For coffee intake, participants were asked, "How many cups of coffee do you drink each day? (Include decaffeinated coffee)". Participants who indicated that they drank at least one glass of coffee each day were further asked, "What type of coffee do you usually drink?" The answers included

Decaffeinated coffee (any type), Instant coffee, Ground coffee (including espresso, filter, etc.), Other types of coffee. Participants were asked, "How many glasses of water do you drink a day?" for water intake. For tea intake, participants were asked, "How many cups of tea do you drink each day? (Include black and green tea)". Cooked vegetable intake was obtained from the question, "On

average how many heaped tablespoons of cooked vegetables would you eat per day? (Do not include potatoes)". Salad / raw vegetable intake assessed using the following question "On average, how many heaped tablespoons of salad or raw vegetables would you eat per day? (Include lettuce, tomato in sandwiches)". Fresh fruit intake was obtained from the question "About how many

pieces of fresh fruit would you eat per day? (Count one apple, one banana, ten grapes, etc. as one piece)". Dried fruit intake was obtained from the question "About how many pieces of dried fruit would you eat per day? (Count one prune, one dried apricot, ten raisins as one piece)". Bread intake was obtained from the question, "How many slices of bread do you eat each week?". For food and drink items above, the answer "less than one" was set to 0.5. Participants were asked about their intake frequency of oil fish/ non-oily fish, processed meat, poultry, beef lamb/mutton, pork, cheese, which was reported as "never", "less than once a week", "once a week", "2-4 times a week", "5-6 times a week", and "Once or more daily" and coded from 0 to 5.

In this study, we excluded individuals beyond four times the standard deviation from the mean for each kind of diet phenotype.

### **Assessment of physical activity**

We used self-reported physical activity measured using a modified version of the International Physical Activity Questionnaire (IPAQ), which assessed total physical activity (TPA), including walking, moderate, and vigorous activity undertaken over the last seven days. MET (Metabolic Equivalent Task) scores data were derived based on IPAQ (International Physical Activity Questionnaire) guidelines. Detailed information referred to the website (<http://biobank.ndph.ox.ac.uk/showcase/label.cgi?id=54>). We used total Metabolic Equivalent Task (MET) minutes per week for all activity, including walking, moderate, and vigorous activity. Usual walking pace was characterized as "slow pace", "steady average pace", "brisk pace", and coded to 1 to 3. To assess the time spent watching television, participants were asked, "In a typical day, how many hours do you spend watching TV?"

### **Assessment of sleep**

Sleep duration was recorded as the number of reported hours to the following question "About how many hours sleep do you get in every 24 hours? (please include naps)". Participants were asked "on an average day, how easy do you find getting up in the morning?" with four responses provided ("not at all easy", "not very easy", "fairly easy", "very easy") and coded to 1 to 4. Participants were asked, "Do you consider yourself to be..." to assess morningness or eveningness (chronotype). Four options were provided under this question: "definitely a 'morning' person", "more a 'morning' than 'evening' person", "more an 'evening' than 'morning' person", "definitely an 'evening' person" and coded 1 to 4. To assess insomnia symptoms, participants were asked, "Do you have trouble falling asleep at night, or do you wake up in the middle of the night?" with three options "never/rarely", "sometimes", and "usually" and codes 1,2,3. Participants were asked, "Do you have a nap during the day?" with the same responses to insomnia symptoms. Finally, daytime dozing/sleeping (narcolepsy) was coded based on answers to the following question: "How likely are you to doze off or fall asleep during the daytime when you don't mean to", with the following options: "never/rarely", "sometimes", "often", "all of the time", coded to 0 to 3.

### **Assessment of smoking**

Smoking data were obtained from the touchscreen questionnaire at the baseline appointment. Participants were asked about their smoking history [UK Biobank Field ID: 20160]. The number of cigarettes currently smoked daily (current cigarette smokers) was acquired from the question "About how many cigarettes do you smoke on average each day?".

### **Assessment of alcohol intake**

Alcohol intake data were obtained from the touchscreen questionnaire at the baseline appointment. Participants were asked about their alcohol intake frequency [UK Biobank Field ID: 1558] was reported as "never", "special occasions only", "one to three times a month", "once or twice a week",

"three or four times a week", and "daily or almost daily" and coded from 0 to 5. Average weekly alcohol consumption of a range of drink types: red wine, champagne /white wine, beer/cider, spirits, and fortified wine were collected from participants who indicated they drink alcohol more often than once or twice a week. The measurement units for each of the five alcoholic drink types: 5 measures for spirits, glasses for wines, and pints for beer/cider, which were estimated to be equivalent to 1, 2, and 2.5 units, respectively. Individuals reporting current intake frequency of "one to three times a month", "special occasions only" or "never" (for whom this phenotype was not collected), were assumed to have a weekly alcohol consumption volume of 0. From these measures, we calculated an average intake of alcoholic units per week, derived by combining the 10 self-reported estimated intakes of the different alcoholic beverage consumptions across the five drink types, as in a previous study<sup>1</sup>.

### **Assessment of cognitive function**

Fluid intelligence score was obtained from a simple unweighted sum of the number of correct answers given to the 13 fluid intelligence questions. Participants who did not answer all of the 15 questions within the allotted two min limit are scored as zero for each of the unattempted questions.

Reaction time: First, the participants were presented with 2 cards in the middle of the screen. Second, the participants were asked to press the button box as soon as possible when two cards matched. The variable was the mean duration (milliseconds) to the first press of snap-button summed over rounds in which both cards matched.

20 Numeric memory: Firstly, the participants were presented with a string of numbers on the screen, which subsequently disappeared. Secondly, the participants were asked to enter the number in reverse order. If the answer was correct, there would be a longer number on the screen to remember. The test would end when two mistakes are made or five successive incorrect responses at string

length = 2. The variable was maximum string length recalled correctly (range: 0-12), with higher scores indicating better performance.

Pairs matching: Firstly, participants were shown six card-pairs of symbols randomly scrambled on screen. Secondly, cards will then turn face down on the screen, and the participants were asked to  
5 select the pairs by touching the screen. As pairs were found correctly, the cards will disappear. The variable was the number of errors made during pairs matching (range 0-146).

Prospective memory: In this test, the participants were asked to remember to carry out a pre-planned instruction after a filled interval. First, at the beginning of the test, they were shown the following instruction: "At the end of the games, we will show you four colored symbols and ask  
10 you to touch the blue square. However, to test your memory, we want you to actually touch the orange circle instead." The variable was whether or not the participants remembered to touch the orange circle on the first attempt.

Matrix pattern completion: First, the participants were shown a series of matrix pattern blocks with missing elements. Second, the participants were asked to choose the element that could best  
15 complete the pattern from a series of given choices. The variable was the number of puzzles for which the participant gave the correct solution.

Symbol digit substitution: First, the participants were shown a grid linking symbols to a single integer, and another grid containing only symbols. Second, the participants were required to use the symbol-integer pair in the first grid as a key to indicate the number attached to each symbol in  
20 the second grid. The variable is the number of symbols correctly matched to digits by the participants.

Tower rearranging: First, the participants were shown illustrations of three piles (towers) on which three iron rings of different colors were placed. Second, the participants were asked to indicate how many steps it takes to rearrange the hoop to another specific position. The variable was the number of puzzles correctly answered.

5 Trail making: First, the participants were shown 25 circles distributed on the screen, which contained 1-25 numbers (digital trails) or a mixture of numbers and letters (alphanumeric trails). Second, the participants are required to connect the circle from the smallest number to the largest number in one task (number tracking), or alternate between numbers and letters in ascending alphabetical order in another task (alphanumeric tracking). The variable was the duration  
10 (deciseconds) to complete the trail. Please note that we reverse the sign of the variable to ensure that the higher the score, the better the performance.

### **Structural MRI**

Structural MRIs were collected across three imaging centers that were equipped with identical scanners (Siemens Skyra 3T running VD13A SP4 with a Siemens 32-channel RF receive head coil,  
15 Munich, Germany). For each scan, Siemens auto-align software determined the field-of-view, which aligns a scout scan to an atlas. If auto-align failed, the radiographer set the alignment. Structural images were acquired with straight sagittal orientation (i.e., with the field of view aligned to the scanner axes), with a resolution of  $1 \times 1 \times 1$  mm and a field of view of  $208 \times 256 \times$   
20  $256$  matrix, over a duration of 5 minutes, and with 1-mm isotropic resolution using a 3-dimensional magnetization-prepared rapid-acquisition gradient echo. The MRI protocols have been described in detail elsewhere<sup>2</sup>.

### **Genetic Data**

Genotype data are available for all 500,000 participants in the UKB cohort. All blood samples were genotyped using the UK BiLEVE array and the UK Biobank axion array. The two single nucleotide polymorphism (SNP) arrays are very similar, with over 95% common marker content. Quality control was performed by Affymetrix, the Wellcome Trust Centre for Human Genetics, and by the present authors; this included removal of participants based on missingness, relatedness, gender mismatch, non-British ancestry and other criteria, details of the array design, genotyping, quality control and imputation are available in a previous publication<sup>3</sup>.



## Supplementary Figure

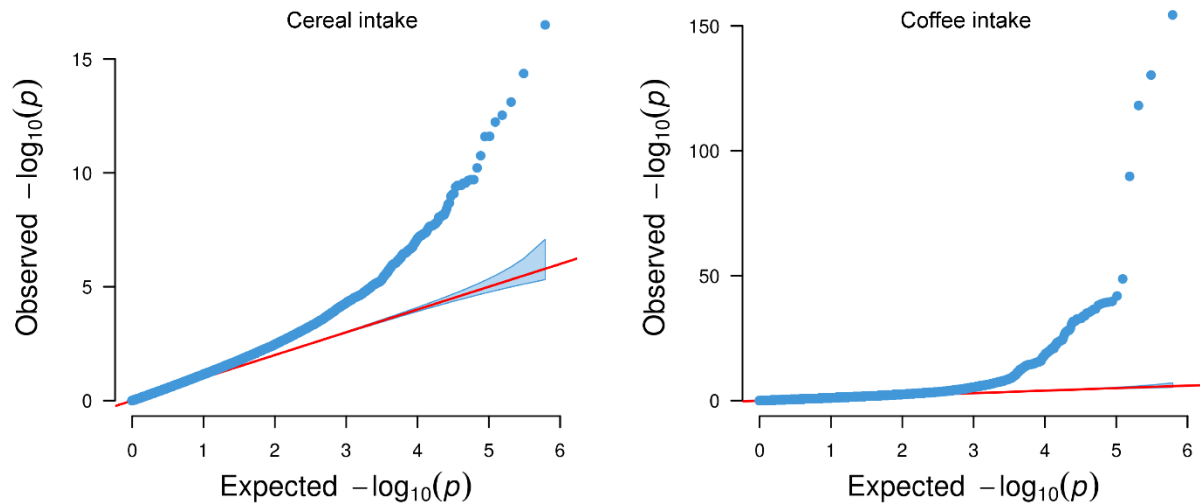

**Fig. S1.** QQ-plots for the genome-wide association studies of cereal intake (left) and coffee intake (right). Inflations of the QQ-plots were not due to population stratification, with intercepts from LD regression estimated as 1.013 (cereal intake) and 1.005 (coffee intake).

## References

1. Howe LJ, *et al.* Genetic evidence for assortative mating on alcohol consumption in the UK Biobank. *Nature communications* **10**, 1-10 (2019).
2. Miller KL, *et al.* Multimodal population brain imaging in the UK Biobank prospective epidemiological study. *Nature neuroscience* **19**, 1523 (2016).
3. Bycroft C, *et al.* The UK Biobank resource with deep phenotyping and genomic data. *Nature* **562**, 203 (2018).

**Table S1: Demographic characteristics.**

| N.genotyped,non-AD<br>N. of females (%)                                 | Baseline (2006-2010) |         |         | Baseline (2006-2010) |         |                    |       |           |         | Follow-up (2014+) |       |                    |       |           |        |  |
|-------------------------------------------------------------------------|----------------------|---------|---------|----------------------|---------|--------------------|-------|-----------|---------|-------------------|-------|--------------------|-------|-----------|--------|--|
|                                                                         |                      |         |         | Discovery sample     |         | Replication sample |       | T test    |         | Discovery sample  |       | Replication sample |       | T test    |        |  |
|                                                                         | 336517               |         |         | 18879                |         | 16412              |       | Cohen's D |         | 18879             |       | 16412              |       | Cohen's D |        |  |
|                                                                         | 180737(53.71%)       |         |         | 9890(52.39%)         |         | 8655(52.74%)       |       | T         |         | 9890(52.39%)      |       | 8655(52.74%)       |       | P         |        |  |
|                                                                         | N                    | mean    | std     | N                    | mean    | std                | N     | mean      | std     | N                 | mean  | std                | N     | mean      | std    |  |
| Age at baseline (years)                                                 | 336517               | 56.87   | 7.99    | 18879                | 55.10   | 7.46               | 16412 | 54.90     | 7.37    | 18879             | 55.10 | 7.46               | 16412 | 54.90     | 7.37   |  |
| Age at MRI scan (years)                                                 |                      |         |         |                      | NA      |                    |       | NA        |         | 18879             | 63.24 | 7.45               | 16412 | 64.98     | 7.40   |  |
| <b>Diet</b>                                                             |                      |         |         |                      |         |                    |       |           |         |                   |       |                    |       |           |        |  |
| Cereal intake                                                           | 335696               | 4.63    | 2.75    | 18858                | 4.85    | 2.66               | 16395 | 4.78      | 2.69    | 0.027             | 2.52  | 1.19E-02           | 18727 | 4.58      | 2.78   |  |
| Coffee intake                                                           | 335068               | 2.04    | 1.94    | 18840                | 2.07    | 1.92               | 16314 | 2.00      | 1.80    | 0.038             | 3.53  | 4.14E-04           | 18657 | 2.03      | 1.75   |  |
| Water intake                                                            | 333236               | 2.56    | 2.03    | 18756                | 2.42    | 1.98               | 16317 | 2.56      | 2.00    | -0.069            | -6.45 | 1.17E-10           | 18643 | 2.38      | 1.89   |  |
| Tea intake                                                              | 333868               | 3.38    | 2.55    | 18781                | 3.40    | 2.54               | 16338 | 3.30      | 2.47    | 0.042             | 3.93  | 8.48E-05           | 18678 | 3.36      | 2.47   |  |
| Cooked vegetable intake                                                 | 330285               | 2.59    | 1.37    | 18667                | 2.55    | 1.33               | 16238 | 2.56      | 1.33    | -0.011            | -0.98 | 3.27E-01           | 18587 | 2.72      | 1.49   |  |
| Salad / raw vegetable intake                                            | 331342               | 2.05    | 1.68    | 18707                | 2.06    | 1.69               | 16184 | 2.02      | 1.53    | 0.028             | 2.58  | 9.82E-03           | 18555 | 2.12      | 1.71   |  |
| Fresh fruit intake                                                      | 334354               | 2.16    | 1.39    | 18767                | 2.17    | 1.34               | 16323 | 2.20      | 1.34    | -0.021            | -1.94 | 5.27E-02           | 18647 | 2.19      | 1.39   |  |
| Dried fruit intake                                                      | 330603               | 0.73    | 1.18    | 18651                | 0.80    | 1.20               | 16191 | 0.80      | 1.20    | -0.001            | -0.11 | 9.10E-01           | 18524 | 0.79      | 1.20   |  |
| Bread intake                                                            | 331220               | 12.26   | 8.03    | 18605                | 12.25   | 8.05               | 16249 | 11.92     | 7.82    | 0.041             | 3.85  | 1.19E-04           | 18613 | 10.26     | 7.10   |  |
| Oily fish intake                                                        | 335040               | 1.64    | 0.92    | 18848                | 1.64    | 0.89               | 16389 | 1.64      | 0.89    | -0.001            | -0.07 | 9.41E-01           | 18731 | 1.77      | 0.91   |  |
| Non-oily fish intake                                                    | 334997               | 1.80    | 0.77    | 18843                | 1.78    | 0.77               | 16375 | 1.77      | 0.76    | 0.014             | 1.27  | 2.05E-01           | 18706 | 1.78      | 0.76   |  |
| Processed meat intake                                                   | 336048               | 1.90    | 1.04    | 18871                | 1.86    | 1.05               | 16402 | 1.84      | 1.05    | 0.017             | 1.57  | 1.18E-01           | 18739 | 1.83      | 1.04   |  |
| Poultry intake                                                          | 335976               | 2.30    | 0.87    | 18869                | 2.29    | 0.89               | 16404 | 2.29      | 0.90    | 0.002             | 0.17  | 8.65E-01           | 18744 | 2.34      | 0.92   |  |
| Beef intake                                                             | 335277               | 1.46    | 0.82    | 18862                | 1.43    | 0.82               | 16398 | 1.45      | 0.82    | -0.018            | -1.67 | 9.45E-02           | 18725 | 1.38      | 0.80   |  |
| Lamb/mutton intake                                                      | 334587               | 1.10    | 0.70    | 18834                | 1.08    | 0.67               | 16383 | 1.09      | 0.68    | -0.011            | -1.02 | 3.08E-01           | 18715 | 1.00      | 0.63   |  |
| Pork intake                                                             | 334529               | 1.14    | 0.70    | 18833                | 1.12    | 0.68               | 16377 | 1.11      | 0.67    | 0.016             | 1.48  | 1.40E-01           | 18703 | 1.09      | 0.68   |  |
| Cheese intake                                                           | 328719               | 2.55    | 1.06    | 18596                | 2.62    | 1.04               | 16126 | 2.68      | 1.05    | -0.054            | -4.99 | 6.20E-07           | 18416 | 2.66      | 1.07   |  |
| <b>Lifestyle</b>                                                        |                      |         |         |                      |         |                    |       |           |         |                   |       |                    |       |           |        |  |
| Time spent watching television (TV)                                     | 334146               | 2.81    | 1.64    | 18825                | 2.46    | 1.44               | 16373 | 2.35      | 1.40    | 0.073             | 6.80  | 1.09E-11           | 18713 | 2.83      | 1.53   |  |
| Usual walking pace                                                      | 334676               | 2.33    | 0.61    | 18846                | 2.47    | 0.56               | 16392 | 2.49      | 0.55    | -0.033            | -3.07 | 2.13E-03           | 18723 | 2.42      | 0.57   |  |
| Summed MET minutes per week for all activity                            | 272702               | 2665.33 | 2709.46 | 16170                | 2475.16 | 2454.39            | 14163 | 2445.76   | 2383.88 | 0.012             | 1.05  | 2.92E-01           | NA    | NA        | NA     |  |
| MET minutes per week for moderate activity                              | 272702               | 943.81  | 1232.02 | 16170                | 836.99  | 1124.67            | 14163 | 820.33    | 1107.09 | 0.015             | 1.30  | 1.95E-01           | NA    | NA        | NA     |  |
| MET minutes per week for vigorous activity                              | 272702               | 673.03  | 1196.86 | 16170                | 672.17  | 1068.91            | 14163 | 668.95    | 1036.28 | 0.003             | 0.27  | 7.91E-01           | NA    | NA        | NA     |  |
| MET minutes per week for walking                                        | 272702               | 1048.49 | 1089.74 | 16170                | 966.00  | 1033.92            | 14163 | 956.47    | 1009.89 | 0.009             | 0.81  | 4.19E-01           | NA    | NA        | NA     |  |
| Sleep duration                                                          | 334737               | 7.17    | 1.08    | 18833                | 7.17    | 0.96               | 16388 | 7.18      | 0.95    | -0.012            | -1.13 | 2.57E-01           | 18710 | 7.16      | 1.04   |  |
| Getting up in morning                                                   | 335820               | 3.12    | 0.77    | 18765                | 3.10    | 0.77               | 16360 | 3.10      | 0.75    | 0.006             | 0.56  | 5.72E-01           | 18745 | 3.22      | 0.73   |  |
| Morning/evening person (chronotype)                                     | 300556               | 2.19    | 0.93    | 16803                | 2.23    | 0.92               | 14631 | 2.23      | 0.93    | -0.006            | -0.52 | 6.05E-01           | 17072 | 2.16      | 0.94   |  |
| Nap during day                                                          | 336393               | 1.49    | 0.60    | 18879                | 1.43    | 0.57               | 16408 | 1.41      | 0.56    | 0.029             | 2.75  | 5.93E-03           | 18750 | 1.48      | 0.60   |  |
| Sleeplessness / insomnia                                                | 336284               | 2.05    | 0.72    | 18871                | 1.99    | 0.72               | 16403 | 1.96      | 0.73    | 0.046             | 4.30  | 1.71E-05           | 18743 | 2.09      | 0.72   |  |
| Daytime dozing / sleeping (narcolepsy)                                  | 335404               | 0.26    | 0.49    | 18859                | 0.22    | 0.46               | 16393 | 0.22      | 0.46    | 0.002             | 0.16  | 8.69E-01           | 18730 | 0.25      | 0.48   |  |
| Ever smoked                                                             | 335394               | 0.60    | 0.49    | 18840                | 0.57    | 0.49               | 16390 | 0.56      | 0.50    | 0.018             | 1.73  | 8.44E-02           | 18696 | 0.54      | 0.50   |  |
| Number of cigarettes currently smoked daily (current cigarette smokers) | 23173                | 15.75   | 8.42    | 687                  | 14.64   | 8.83               | 542   | 13.93     | 7.93    | 0.084             | 1.47  | 1.42E-01           | 377   | 12.62     | 7.48   |  |
| Alcohol intake frequency                                                | 336285               | 3.16    | 1.48    | 18877                | 3.34    | 1.36               | 16409 | 3.37      | 1.37    | -0.021            | -1.99 | 4.70E-02           | 18750 | 3.13      | 1.40   |  |
| Average weekly alcohol intake                                           | 332474               | 16.49   | 19.58   | 18768                | 17.18   | 18.05              | 16310 | 17.37     | 17.87   | -0.010            | -0.97 | 3.31E-01           | 18649 | 14.65     | 16.69  |  |
| <b>Body/blood fat</b>                                                   |                      |         |         |                      |         |                    |       |           |         |                   |       |                    |       |           |        |  |
| Body mass index (BMI)                                                   | 335428               | 27.39   | 4.75    | 18879                | 26.65   | 4.27               | 16412 | 26.49     | 4.16    | 0.037             | 3.45  | 5.52E-04           | NA    | NA        | NA     |  |
| Cholesterol                                                             | 320830               | 5.71    | 1.14    | 17857                | 5.73    | 1.10               | 15703 | 5.75      | 1.07    | -0.018            | -1.64 | 1.01E-01           | NA    | NA        | NA     |  |
| HDL cholesterol                                                         | 293704               | 1.45    | 0.38    | 16269                | 1.47    | 0.37               | 14330 | 1.49      | 0.38    | -0.040            | -3.50 | 4.59E-04           | NA    | NA        | NA     |  |
| LDL direct                                                              | 320224               | 3.57    | 0.87    | 17820                | 3.58    | 0.84               | 15671 | 3.59      | 0.82    | -0.015            | -1.36 | 1.73E-01           | NA    | NA        | NA     |  |
| Triglycerides                                                           | 320566               | 1.76    | 1.02    | 17843                | 1.66    | 0.98               | 15691 | 1.63      | 0.94    | 0.037             | 3.41  | 6.49E-04           | NA    | NA        | NA     |  |
| <b>Cognitive function</b>                                               |                      |         |         |                      |         |                    |       |           |         |                   |       |                    |       |           |        |  |
| Fluid intelligence score                                                | 108659               | 6.18    | 2.10    | 6745                 | 6.75    | 1.98               | 4999  | 6.87      | 2.03    | -0.060            | -3.23 | 1.24E-03           | 17045 | 6.80      | 2.06   |  |
| Maximum digits remembered correctly                                     | 34880                | 6.72    | 1.32    | 1868                 | 7.00    | 1.21               | 1737  | 6.98      | 1.25    | 0.014             | 0.43  | 6.67E-01           | 8184  | 6.80      | 1.24   |  |
| Prospective memory result                                               | 110912               | 0.80    | 0.40    | 6791                 | 0.88    | 0.33               | 5020  | 0.88      | 0.32    | -0.014            | -0.77 | 4.44E-01           | 17459 | 0.87      | 0.33   |  |
| Mean time to correctly identify matches                                 | 334488               | 555.37  | 112.91  | 18849                | 538.20  | 100.14             | 16383 | 533.91    | 97.81   | 0.043             | 4.05  | 5.06E-05           | 17411 | 587.69    | 106.70 |  |
| Number of incorrect matches in round                                    | 336199               | 0.50    | 1.10    | 18778                | 0.36    | 0.86               | 16367 | 0.37      | 0.90    | -0.012            | -1.10 | 2.73E-01           | 17476 | 0.33      | 0.83   |  |
| Number of puzzles correctly solved                                      | NA                   | NA      | NA      | NA                   | NA      | NA                 | NA    | NA        | NA      | NA                | NA    | NA                 | 7564  | 8.07      | 2.10   |  |
| Number of symbol digit matches made correctly                           | NA                   | NA      | NA      | NA                   | NA      | NA                 | NA    | NA        | NA      | NA                | NA    | NA                 | 7584  | 19.35     | 5.21   |  |
| Number of puzzles correct                                               | NA                   | NA      | NA      | NA                   | NA      | NA                 | NA    | NA        | NA      | NA                | NA    | NA                 | 7495  | 10.09     | 3.22   |  |
| Duration to complete numeric path                                       | NA                   | NA      | NA      | NA                   | NA      | NA                 | NA    | NA        | NA      | NA                | NA    | NA                 | 7647  | 217.10    | 83.23  |  |
| Duration to complete alphanumeric path                                  | NA                   | NA      | NA      | NA                   | NA      | NA                 | NA    | NA        | NA      | NA                | NA    | NA                 | 7647  | 531.45    | 255.91 |  |

**Table S2: Associations between grey matter volumes and diet phenotypes (follow-up).**

| Number               | AAL 3 region         | beta     | 95%CI_l  | 95%CI_h  | se     | t      | r      | p        | df.e  | beta                 | 95%CI_l | 95%CI_h | se     | t      | r     | p        | df.e  |
|----------------------|----------------------|----------|----------|----------|--------|--------|--------|----------|-------|----------------------|---------|---------|--------|--------|-------|----------|-------|
| <b>Coffee intake</b> |                      |          |          |          |        |        |        |          |       | <b>Cereal intake</b> |         |         |        |        |       |          |       |
| 0                    | Total brain          | -340.263 | -415.637 | -264.889 | 38.454 | -8.849 | -0.065 | 9.65E-19 | 18651 | 289.283              | 241.700 | 336.866 | 24.276 | 11.916 | 0.087 | 1.27E-32 | 18721 |
| 1                    | Precentral_L         | -8.109   | -10.765  | -5.454   | 1.355  | -5.985 | -0.044 | 2.20E-09 | 18651 | 4.094                | 2.414   | 5.774   | 0.857  | 4.778  | 0.035 | 1.79E-06 | 18721 |
| 2                    | Precentral_R         | -7.425   | -9.859   | -4.991   | 1.242  | -5.980 | -0.044 | 2.27E-09 | 18651 | 5.492                | 3.954   | 7.031   | 0.785  | 7.000  | 0.051 | 2.65E-12 | 18721 |
| 3                    | Frontal_Sup_2_L      | -9.415   | -12.218  | -6.613   | 1.430  | -6.585 | -0.048 | 4.67E-11 | 18651 | 6.944                | 5.173   | 8.715   | 0.904  | 7.685  | 0.056 | 1.61E-14 | 18721 |
| 4                    | Frontal_Sup_2_R      | -11.824  | -14.911  | -8.736   | 1.575  | -7.506 | -0.055 | 6.37E-14 | 18651 | 8.035                | 6.083   | 9.986   | 0.996  | 8.068  | 0.059 | 7.56E-16 | 18721 |
| 5                    | Frontal_Mid_2_L      | -9.467   | -12.411  | -6.523   | 1.502  | -6.303 | -0.046 | 2.98E-10 | 18651 | 6.858                | 4.998   | 8.719   | 0.949  | 7.225  | 0.053 | 5.20E-13 | 18721 |
| 6                    | Frontal_Mid_2_R      | -12.563  | -15.893  | -9.234   | 1.699  | -7.397 | -0.054 | 1.45E-13 | 18651 | 9.195                | 7.091   | 11.299  | 1.073  | 8.566  | 0.062 | 1.16E-17 | 18721 |
| 7                    | Frontal_Inf_Oper_L   | -2.543   | -3.413   | -1.673   | 0.444  | -5.729 | -0.042 | 1.03E-08 | 18651 | 1.655                | 1.105   | 2.205   | 0.281  | 5.896  | 0.043 | 3.78E-09 | 18721 |
| 8                    | Frontal_Inf_Oper_R   | -3.103   | -4.195   | -2.011   | 0.557  | -5.571 | -0.041 | 2.57E-08 | 18651 | 2.438                | 1.748   | 3.127   | 0.352  | 6.930  | 0.051 | 4.33E-12 | 18721 |
| 9                    | Frontal_Inf_Tri_L    | -5.629   | -7.477   | -3.781   | 0.943  | -5.971 | -0.044 | 2.40E-09 | 18651 | 4.356                | 3.189   | 5.524   | 0.596  | 7.315  | 0.053 | 2.68E-13 | 18721 |
| 10                   | Frontal_Inf_Tri_R    | -4.926   | -6.377   | -3.474   | 0.741  | -6.651 | -0.049 | 3.00E-11 | 18651 | 3.456                | 2.539   | 4.373   | 0.468  | 7.388  | 0.054 | 1.55E-13 | 18721 |
| 11                   | Frontal_Inf_Orb_2_L  | -1.331   | -1.883   | -0.779   | 0.282  | -4.723 | -0.035 | 2.34E-06 | 18651 | 1.547                | 1.199   | 1.896   | 0.178  | 8.696  | 0.063 | 3.71E-18 | 18721 |
| 12                   | Frontal_Inf_Orb_2_R  | -1.488   | -2.066   | -0.910   | 0.295  | -5.047 | -0.037 | 4.53E-07 | 18651 | 1.629                | 1.264   | 1.994   | 0.186  | 8.753  | 0.064 | 2.26E-18 | 18721 |
| 13                   | Rolandic_Oper_L      | -2.183   | -3.019   | -1.346   | 0.427  | -5.116 | -0.037 | 3.16E-07 | 18651 | 1.564                | 1.035   | 2.092   | 0.270  | 5.800  | 0.042 | 6.72E-09 | 18721 |
| 14                   | Rolandic_Oper_R      | -3.386   | -4.583   | -2.189   | 0.611  | -5.545 | -0.041 | 2.97E-08 | 18651 | 2.824                | 2.069   | 3.580   | 0.386  | 7.326  | 0.053 | 2.47E-13 | 18721 |
| 15                   | Supp_Motor_Area_L    | -5.603   | -7.590   | -3.616   | 1.014  | -5.528 | -0.040 | 3.29E-08 | 18651 | 3.311                | 2.055   | 4.567   | 0.641  | 5.168  | 0.038 | 2.40E-07 | 18721 |
| 16                   | Supp_Motor_Area_R    | -6.147   | -8.343   | -3.952   | 1.120  | -5.489 | -0.040 | 4.09E-08 | 18651 | 3.760                | 2.373   | 5.148   | 0.708  | 5.312  | 0.039 | 1.10E-07 | 18721 |
| 17                   | Olfactory_L          | -0.537   | -0.833   | -0.242   | 0.151  | -3.564 | -0.026 | 3.66E-04 | 18651 | 0.602                | 0.415   | 0.789   | 0.095  | 6.323  | 0.046 | 2.63E-10 | 18721 |
| 18                   | Olfactory_R          | -0.565   | -0.861   | -0.269   | 0.151  | -3.736 | -0.027 | 1.87E-04 | 18651 | 0.508                | 0.321   | 0.696   | 0.095  | 5.325  | 0.039 | 1.02E-07 | 18721 |
| 19                   | Frontal_Sup_Medial_L | -5.904   | -7.765   | -4.043   | 0.949  | -6.219 | -0.045 | 5.13E-10 | 18651 | 5.745                | 4.570   | 6.920   | 0.599  | 9.584  | 0.070 | 1.05E-21 | 18721 |
| 20                   | Frontal_Sup_Medial_R | -4.487   | -5.842   | -3.132   | 0.691  | -6.491 | -0.047 | 8.74E-11 | 18651 | 3.644                | 2.788   | 4.500   | 0.437  | 8.348  | 0.061 | 7.45E-17 | 18721 |
| 21                   | Frontal_Med_Orb_L    | -2.116   | -2.812   | -1.420   | 0.355  | -5.957 | -0.044 | 2.61E-09 | 18651 | 2.050                | 1.610   | 2.489   | 0.224  | 9.149  | 0.067 | 6.34E-20 | 18721 |
| 22                   | Frontal_Med_Orb_R    | -2.708   | -3.563   | -1.853   | 0.436  | -6.205 | -0.045 | 5.57E-10 | 18651 | 2.464                | 1.924   | 3.003   | 0.275  | 8.948  | 0.065 | 3.95E-19 | 18721 |
| 23                   | Rectus_L             | -1.740   | -2.460   | -1.020   | 0.367  | -4.735 | -0.035 | 2.21E-06 | 18651 | 2.094                | 1.639   | 2.548   | 0.232  | 9.030  | 0.066 | 1.88E-19 | 18721 |
| 24                   | Rectus_R             | -1.668   | -2.334   | -1.002   | 0.340  | -4.911 | -0.036 | 9.16E-07 | 18651 | 1.773                | 1.353   | 2.194   | 0.215  | 8.265  | 0.060 | 1.49E-16 | 18721 |
| 25                   | OFCmed_L             | -1.109   | -1.526   | -0.691   | 0.213  | -5.208 | -0.038 | 1.92E-07 | 18651 | 0.954                | 0.691   | 1.218   | 0.134  | 7.096  | 0.052 | 1.33E-12 | 18721 |
| 26                   | OFCmed_R             | -1.268   | -1.754   | -0.781   | 0.248  | -5.109 | -0.037 | 3.26E-07 | 18651 | 0.888                | 0.581   | 1.196   | 0.157  | 5.666  | 0.041 | 1.49E-08 | 18721 |
| 27                   | OFCant_L             | -1.254   | -1.737   | -0.771   | 0.246  | -5.091 | -0.037 | 3.61E-07 | 18651 | 0.769                | 0.464   | 1.074   | 0.156  | 4.939  | 0.036 | 7.92E-07 | 18721 |
| 28                   | OFCant_R             | -1.483   | -2.121   | -0.845   | 0.326  | -4.556 | -0.033 | 5.25E-06 | 18651 | 1.351                | 0.948   | 1.754   | 0.205  | 6.573  | 0.048 | 5.05E-11 | 18721 |
| 29                   | OFCpost_L            | -1.531   | -2.136   | -0.927   | 0.308  | -4.965 | -0.036 | 6.93E-07 | 18651 | 0.977                | 0.595   | 1.359   | 0.195  | 5.016  | 0.037 | 5.33E-07 | 18721 |
| 30                   | OFCpost_R            | -1.300   | -1.859   | -0.741   | 0.285  | -4.560 | -0.033 | 5.16E-06 | 18651 | 1.302                | 0.949   | 1.655   | 0.180  | 7.233  | 0.053 | 4.91E-13 | 18721 |
| 31                   | OFClat_L             | -0.459   | -0.663   | -0.255   | 0.104  | -4.415 | -0.032 | 1.02E-05 | 18651 | 0.443                | 0.314   | 0.572   | 0.066  | 6.746  | 0.049 | 1.56E-11 | 18721 |
| 32                   | OFClat_R             | -0.381   | -0.553   | -0.209   | 0.088  | -4.338 | -0.032 | 1.44E-05 | 18651 | 0.467                | 0.358   | 0.576   | 0.055  | 8.419  | 0.061 | 4.08E-17 | 18721 |
| 33                   | Insula_L             | -6.983   | -8.849   | -5.117   | 0.952  | -7.335 | -0.054 | 2.31E-13 | 18651 | 4.304                | 3.124   | 5.484   | 0.602  | 7.148  | 0.052 | 9.14E-13 | 18721 |
| 34                   | Insula_R             | -6.881   | -8.701   | -5.062   | 0.928  | -7.413 | -0.054 | 1.29E-13 | 18651 | 5.083                | 3.934   | 6.232   | 0.586  | 8.668  | 0.063 | 4.75E-18 | 18721 |
| 37                   | Cingulate_Mid_L      | -5.538   | -7.116   | -3.960   | 0.805  | -6.878 | -0.050 | 6.28E-12 | 18651 | 5.013                | 4.017   | 6.010   | 0.508  | 9.860  | 0.072 | 7.09E-23 | 18721 |
| 38                   | Cingulate_Mid_R      | -5.675   | -7.359   | -3.992   | 0.859  | -6.608 | -0.048 | 3.99E-11 | 18651 | 5.561                | 4.498   | 6.624   | 0.542  | 10.257 | 0.075 | 1.28E-24 | 18721 |
| 39                   | Cingulate_Post_L     | -0.761   | -1.244   | -0.278   | 0.246  | -3.087 | -0.023 | 2.02E-03 | 18651 | 0.558                | 0.253   | 0.864   | 0.156  | 3.587  | 0.026 | 3.35E-04 | 18721 |
| 40                   | Cingulate_Post_R     | -0.178   | -0.446   | 0.090    | 0.137  | -1.299 | -0.010 | 1.94E-01 | 18651 | 0.197                | 0.027   | 0.366   | 0.086  | 2.277  | 0.017 | 2.28E-02 | 18721 |
| 41                   | Hippocampus_L        | -0.455   | -1.236   | 0.326    | 0.399  | -1.141 | -0.008 | 2.54E-01 | 18651 | 1.382                | 0.889   | 1.875   | 0.252  | 5.491  | 0.040 | 4.04E-08 | 18721 |
| 42                   | Hippocampus_R        | -0.557   | -1.367   | 0.253    | 0.413  | -1.348 | -0.010 | 1.78E-01 | 18651 | 1.183                | 0.672   | 1.695   | 0.261  | 4.533  | 0.033 | 5.86E-06 | 18721 |
| 43                   | ParaHippocampal_L    | -0.724   | -1.418   | -0.030   | 0.354  | -2.045 | -0.015 | 4.09E-02 | 18651 | 1.491                | 1.053   | 1.929   | 0.224  | 6.669  | 0.049 | 2.65E-11 | 18721 |
| 44                   | ParaHippocampal_R    | -1.062   | -1.937   | -0.186   | 0.447  | -2.377 | -0.017 | 1.75E-02 | 18651 | 2.088                | 1.535   | 2.641   | 0.282  | 7.404  | 0.054 | 1.38E-13 | 18721 |
| 45                   | Amygdala_L           | -0.617   | -0.887   | -0.348   | 0.138  | -4.488 | -0.033 | 7.23E-06 | 18651 | 0.464                | 0.293   | 0.634   | 0.087  | 5.335  | 0.039 | 9.65E-08 | 18721 |

|    |                      |        |         |        |       |        |        |          |       |       |        |       |       |       |       |          |       |
|----|----------------------|--------|---------|--------|-------|--------|--------|----------|-------|-------|--------|-------|-------|-------|-------|----------|-------|
| 46 | Amygdala_R           | -0.798 | -1.073  | -0.522 | 0.141 | -5.676 | -0.042 | 1.40E-08 | 18651 | 0.572 | 0.398  | 0.746 | 0.089 | 6.433 | 0.047 | 1.28E-10 | 18721 |
| 47 | Calcarine_L          | -6.668 | -9.238  | -4.097 | 1.312 | -5.084 | -0.037 | 3.73E-07 | 18651 | 0.712 | -0.914 | 2.339 | 0.830 | 0.858 | 0.006 | 3.91E-01 | 18721 |
| 48 | Calcarine_R          | -5.356 | -7.505  | -3.207 | 1.096 | -4.886 | -0.036 | 1.04E-06 | 18651 | 0.788 | -0.571 | 2.148 | 0.694 | 1.137 | 0.008 | 2.56E-01 | 18721 |
| 49 | Cuneus_L             | -3.575 | -5.188  | -1.961 | 0.823 | -4.343 | -0.032 | 1.42E-05 | 18651 | 1.073 | 0.053  | 2.093 | 0.521 | 2.061 | 0.015 | 3.93E-02 | 18721 |
| 50 | Cuneus_R             | -3.156 | -4.391  | -1.922 | 0.630 | -5.013 | -0.037 | 5.41E-07 | 18651 | 1.380 | 0.600  | 2.161 | 0.398 | 3.467 | 0.025 | 5.28E-04 | 18721 |
| 51 | Lingual_L            | -3.718 | -5.264  | -2.172 | 0.789 | -4.713 | -0.034 | 2.46E-06 | 18651 | 1.324 | 0.346  | 2.302 | 0.499 | 2.654 | 0.019 | 7.96E-03 | 18721 |
| 52 | Lingual_R            | -3.067 | -4.689  | -1.446 | 0.827 | -3.708 | -0.027 | 2.10E-04 | 18651 | 1.699 | 0.674  | 2.724 | 0.523 | 3.249 | 0.024 | 1.16E-03 | 18721 |
| 53 | Occipital_Sup_L      | -2.457 | -3.521  | -1.394 | 0.543 | -4.529 | -0.033 | 5.97E-06 | 18651 | 1.407 | 0.735  | 2.079 | 0.343 | 4.103 | 0.030 | 4.10E-05 | 18721 |
| 54 | Occipital_Sup_R      | -2.695 | -3.849  | -1.542 | 0.588 | -4.582 | -0.034 | 4.64E-06 | 18651 | 2.033 | 1.305  | 2.762 | 0.372 | 5.473 | 0.040 | 4.49E-08 | 18721 |
| 55 | Occipital_Mid_L      | -5.709 | -8.202  | -3.216 | 1.272 | -4.489 | -0.033 | 7.20E-06 | 18651 | 1.848 | 0.272  | 3.424 | 0.804 | 2.299 | 0.017 | 2.15E-02 | 18721 |
| 56 | Occipital_Mid_R      | -3.824 | -5.558  | -2.090 | 0.885 | -4.322 | -0.032 | 1.55E-05 | 18651 | 1.957 | 0.861  | 3.053 | 0.559 | 3.499 | 0.026 | 4.69E-04 | 18721 |
| 57 | Occipital_Inf_L      | -2.113 | -2.941  | -1.286 | 0.422 | -5.006 | -0.037 | 5.62E-07 | 18651 | 0.236 | -0.287 | 0.760 | 0.267 | 0.885 | 0.006 | 3.76E-01 | 18721 |
| 58 | Occipital_Inf_R      | -1.511 | -2.467  | -0.555 | 0.488 | -3.098 | -0.023 | 1.95E-03 | 18651 | 0.245 | -0.360 | 0.849 | 0.308 | 0.793 | 0.006 | 4.28E-01 | 18721 |
| 59 | Fusiform_L           | -2.428 | -4.238  | -0.617 | 0.924 | -2.628 | -0.019 | 8.61E-03 | 18651 | 3.107 | 1.962  | 4.251 | 0.584 | 5.322 | 0.039 | 1.04E-07 | 18721 |
| 60 | Fusiform_R           | -3.162 | -5.154  | -1.170 | 1.016 | -3.112 | -0.023 | 1.86E-03 | 18651 | 5.141 | 3.884  | 6.398 | 0.641 | 8.016 | 0.058 | 1.16E-15 | 18721 |
| 61 | Postcentral_L        | -7.623 | -10.345 | -4.902 | 1.388 | -5.490 | -0.040 | 4.06E-08 | 18651 | 7.094 | 5.375  | 8.814 | 0.877 | 8.085 | 0.059 | 6.57E-16 | 18721 |
| 62 | Postcentral_R        | -5.550 | -8.343  | -2.757 | 1.425 | -3.895 | -0.029 | 9.84E-05 | 18651 | 7.144 | 5.381  | 8.907 | 0.899 | 7.942 | 0.058 | 2.10E-15 | 18721 |
| 63 | Parietal_Sup_L       | -2.598 | -4.167  | -1.029 | 0.801 | -3.245 | -0.024 | 1.18E-03 | 18651 | 1.790 | 0.798  | 2.782 | 0.506 | 3.536 | 0.026 | 4.07E-04 | 18721 |
| 64 | Parietal_Sup_R       | -3.023 | -4.415  | -1.631 | 0.710 | -4.258 | -0.031 | 2.08E-05 | 18651 | 1.204 | 0.324  | 2.084 | 0.449 | 2.680 | 0.020 | 7.36E-03 | 18721 |
| 65 | Parietal_Inf_L       | -6.742 | -8.795  | -4.689 | 1.047 | -6.438 | -0.047 | 1.24E-10 | 18651 | 4.878 | 3.580  | 6.176 | 0.662 | 7.366 | 0.054 | 1.83E-13 | 18721 |
| 66 | Parietal_Inf_R       | -2.919 | -4.250  | -1.588 | 0.679 | -4.298 | -0.031 | 1.73E-05 | 18651 | 2.570 | 1.729  | 3.412 | 0.429 | 5.989 | 0.044 | 2.15E-09 | 18721 |
| 67 | SupraMarginal_L      | -3.021 | -4.224  | -1.817 | 0.614 | -4.920 | -0.036 | 8.74E-07 | 18651 | 2.756 | 1.995  | 3.517 | 0.388 | 7.102 | 0.052 | 1.27E-12 | 18721 |
| 68 | SupraMarginal_R      | -3.328 | -5.032  | -1.624 | 0.869 | -3.828 | -0.028 | 1.30E-04 | 18651 | 4.504 | 3.429  | 5.580 | 0.549 | 8.209 | 0.060 | 2.37E-16 | 18721 |
| 69 | Angular_L            | -3.233 | -4.416  | -2.051 | 0.603 | -5.360 | -0.039 | 8.42E-08 | 18651 | 1.565 | 0.817  | 2.313 | 0.382 | 4.101 | 0.030 | 4.14E-05 | 18721 |
| 70 | Angular_R            | -3.816 | -5.402  | -2.230 | 0.809 | -4.716 | -0.035 | 2.43E-06 | 18651 | 2.409 | 1.406  | 3.411 | 0.512 | 4.708 | 0.034 | 2.52E-06 | 18721 |
| 71 | Precuneus_L          | -5.492 | -8.375  | -2.610 | 1.471 | -3.735 | -0.027 | 1.88E-04 | 18651 | 4.042 | 2.220  | 5.864 | 0.929 | 4.349 | 0.032 | 1.38E-05 | 18721 |
| 72 | Precuneus_R          | -5.532 | -8.100  | -2.964 | 1.310 | -4.223 | -0.031 | 2.42E-05 | 18651 | 4.085 | 2.462  | 5.708 | 0.828 | 4.934 | 0.036 | 8.13E-07 | 18721 |
| 73 | Paracentral_Lobule_L | -2.569 | -3.890  | -1.248 | 0.674 | -3.812 | -0.028 | 1.39E-04 | 18651 | 1.141 | 0.306  | 1.976 | 0.426 | 2.679 | 0.020 | 7.39E-03 | 18721 |
| 74 | Paracentral_Lobule_R | -1.341 | -2.287  | -0.395 | 0.483 | -2.778 | -0.020 | 5.48E-03 | 18651 | 1.266 | 0.668  | 1.864 | 0.305 | 4.151 | 0.030 | 3.32E-05 | 18721 |
| 75 | Caudate_L            | -0.772 | -1.828  | 0.284  | 0.539 | -1.432 | -0.010 | 1.52E-01 | 18651 | 0.029 | -0.638 | 0.696 | 0.340 | 0.086 | 0.001 | 9.32E-01 | 18721 |
| 76 | Caudate_R            | -1.609 | -2.804  | -0.414 | 0.610 | -2.640 | -0.019 | 8.30E-03 | 18651 | 0.214 | -0.541 | 0.969 | 0.385 | 0.555 | 0.004 | 5.79E-01 | 18721 |
| 77 | Putamen_L            | -3.677 | -5.277  | -2.077 | 0.816 | -4.505 | -0.033 | 6.69E-06 | 18651 | 3.071 | 2.059  | 4.083 | 0.516 | 5.949 | 0.043 | 2.74E-09 | 18721 |
| 78 | Putamen_R            | -4.450 | -6.080  | -2.820 | 0.831 | -5.352 | -0.039 | 8.78E-08 | 18651 | 3.302 | 2.271  | 4.332 | 0.526 | 6.280 | 0.046 | 3.46E-10 | 18721 |
| 79 | Pallidum_L           | -0.131 | -0.274  | 0.011  | 0.073 | -1.808 | -0.013 | 7.06E-02 | 18651 | 0.112 | 0.022  | 0.202 | 0.046 | 2.433 | 0.018 | 1.50E-02 | 18721 |
| 80 | Pallidum_R           | -0.204 | -0.360  | -0.048 | 0.080 | -2.559 | -0.019 | 1.05E-02 | 18651 | 0.141 | 0.043  | 0.240 | 0.050 | 2.806 | 0.021 | 5.02E-03 | 18721 |
| 83 | Heschl_L             | -0.994 | -1.283  | -0.706 | 0.147 | -6.754 | -0.049 | 1.48E-11 | 18651 | 0.529 | 0.347  | 0.712 | 0.093 | 5.687 | 0.042 | 1.31E-08 | 18721 |
| 84 | Heschl_R             | -0.899 | -1.222  | -0.577 | 0.165 | -5.466 | -0.040 | 4.65E-08 | 18651 | 0.618 | 0.414  | 0.822 | 0.104 | 5.945 | 0.043 | 2.82E-09 | 18721 |
| 85 | Temporal_Sup_L       | -7.543 | -9.626  | -5.461 | 1.062 | -7.100 | -0.052 | 1.29E-12 | 18651 | 5.133 | 3.817  | 6.448 | 0.671 | 7.645 | 0.056 | 2.20E-14 | 18721 |
| 86 | Temporal_Sup_R       | -7.410 | -9.714  | -5.106 | 1.175 | -6.304 | -0.046 | 2.96E-10 | 18651 | 5.444 | 3.988  | 6.900 | 0.743 | 7.329 | 0.053 | 2.41E-13 | 18721 |
| 87 | Temporal_Pole_Sup_L  | -2.564 | -3.551  | -1.577 | 0.503 | -5.093 | -0.037 | 3.56E-07 | 18651 | 2.077 | 1.453  | 2.701 | 0.318 | 6.528 | 0.048 | 6.83E-11 | 18721 |
| 88 | Temporal_Pole_Sup_R  | -3.248 | -4.287  | -2.210 | 0.530 | -6.131 | -0.045 | 8.91E-10 | 18651 | 2.469 | 1.813  | 3.126 | 0.335 | 7.372 | 0.054 | 1.75E-13 | 18721 |
| 89 | Temporal_Mid_L       | -9.235 | -12.708 | -5.762 | 1.772 | -5.212 | -0.038 | 1.88E-07 | 18651 | 7.469 | 5.274  | 9.664 | 1.120 | 6.669 | 0.049 | 2.64E-11 | 18721 |
| 90 | Temporal_Mid_R       | -9.776 | -12.858 | -6.693 | 1.573 | -6.216 | -0.045 | 5.22E-10 | 18651 | 5.979 | 4.029  | 7.928 | 0.994 | 6.012 | 0.044 | 1.87E-09 | 18721 |
| 91 | Temporal_Pole_Mid_L  | -1.347 | -2.177  | -0.517 | 0.423 | -3.182 | -0.023 | 1.47E-03 | 18651 | 1.234 | 0.710  | 1.759 | 0.268 | 4.612 | 0.034 | 4.01E-06 | 18721 |
| 92 | Temporal_Pole_Mid_R  | -2.092 | -3.100  | -1.084 | 0.514 | -4.068 | -0.030 | 4.77E-05 | 18651 | 2.088 | 1.451  | 2.725 | 0.325 | 6.425 | 0.047 | 1.35E-10 | 18721 |
| 93 | Temporal_Inf_L       | -4.237 | -6.626  | -1.848 | 1.219 | -3.477 | -0.025 | 5.09E-04 | 18651 | 2.538 | 1.028  | 4.048 | 0.770 | 3.295 | 0.024 | 9.87E-04 | 18721 |
| 94 | Temporal_Inf_R       | -5.124 | -7.728  | -2.519 | 1.329 | -3.856 | -0.028 | 1.15E-04 | 18651 | 1.914 | 0.268  | 3.561 | 0.840 | 2.279 | 0.017 | 2.27E-02 | 18721 |
| 95 | Cerebellum_Crus1_L   | -1.480 | -4.316  | 1.355  | 1.447 | -1.023 | -0.007 | 3.06E-01 | 18651 | 3.036 | 1.243  | 4.829 | 0.915 | 3.320 | 0.024 | 9.03E-04 | 18721 |

|     |                    |        |        |        |       |        |        |          |       |        |        |       |       |        |        |          |       |
|-----|--------------------|--------|--------|--------|-------|--------|--------|----------|-------|--------|--------|-------|-------|--------|--------|----------|-------|
| 96  | Cerebellum_Crus1_R | -1.197 | -4.090 | 1.695  | 1.476 | -0.811 | -0.006 | 4.17E-01 | 18651 | 3.521  | 1.693  | 5.349 | 0.933 | 3.776  | 0.028  | 1.60E-04 | 18721 |
| 97  | Cerebellum_Crus2_L | -0.579 | -2.831 | 1.672  | 1.149 | -0.504 | -0.004 | 6.14E-01 | 18651 | 4.651  | 3.231  | 6.072 | 0.725 | 6.416  | 0.047  | 1.43E-10 | 18721 |
| 98  | Cerebellum_Crus2_R | -0.303 | -2.385 | 1.779  | 1.062 | -0.285 | -0.002 | 7.75E-01 | 18651 | 3.972  | 2.658  | 5.287 | 0.671 | 5.922  | 0.043  | 3.23E-09 | 18721 |
| 99  | Cerebellum_3_L     | 0.140  | -0.011 | 0.291  | 0.077 | 1.815  | 0.013  | 6.96E-02 | 18651 | 0.237  | 0.142  | 0.333 | 0.049 | 4.879  | 0.036  | 1.08E-06 | 18721 |
| 100 | Cerebellum_3_R     | -0.030 | -0.234 | 0.174  | 0.104 | -0.291 | -0.002 | 7.71E-01 | 18651 | 0.290  | 0.162  | 0.419 | 0.066 | 4.421  | 0.032  | 9.87E-06 | 18721 |
| 101 | Cerebellum_4_5_L   | 0.401  | -0.821 | 1.624  | 0.623 | 0.644  | 0.005  | 5.20E-01 | 18651 | 1.330  | 0.558  | 2.102 | 0.394 | 3.376  | 0.025  | 7.37E-04 | 18721 |
| 102 | Cerebellum_4_5_R   | -0.182 | -1.177 | 0.814  | 0.508 | -0.358 | -0.003 | 7.20E-01 | 18651 | 1.622  | 0.993  | 2.251 | 0.321 | 5.056  | 0.037  | 4.31E-07 | 18721 |
| 103 | Cerebellum_6_L     | -0.587 | -2.697 | 1.524  | 1.077 | -0.545 | -0.004 | 5.86E-01 | 18651 | 2.339  | 1.006  | 3.673 | 0.681 | 3.438  | 0.025  | 5.88E-04 | 18721 |
| 104 | Cerebellum_6_R     | -0.952 | -3.175 | 1.272  | 1.135 | -0.839 | -0.006 | 4.02E-01 | 18651 | 3.947  | 2.542  | 5.352 | 0.717 | 5.507  | 0.040  | 3.69E-08 | 18721 |
| 105 | Cerebellum_7b_L    | 0.069  | -0.619 | 0.758  | 0.351 | 0.198  | 0.001  | 8.43E-01 | 18651 | 1.480  | 1.045  | 1.914 | 0.222 | 6.676  | 0.049  | 2.52E-11 | 18721 |
| 106 | Cerebellum_7b_R    | -0.101 | -0.783 | 0.581  | 0.348 | -0.290 | -0.002 | 7.72E-01 | 18651 | 1.747  | 1.317  | 2.177 | 0.220 | 7.957  | 0.058  | 1.86E-15 | 18721 |
| 107 | Cerebellum_8_L     | 1.616  | -0.569 | 3.800  | 1.115 | 1.450  | 0.011  | 1.47E-01 | 18651 | 3.119  | 1.740  | 4.499 | 0.704 | 4.432  | 0.032  | 9.39E-06 | 18721 |
| 108 | Cerebellum_8_R     | 1.964  | -0.878 | 4.807  | 1.450 | 1.355  | 0.010  | 1.75E-01 | 18651 | 6.173  | 4.378  | 7.967 | 0.916 | 6.741  | 0.049  | 1.62E-11 | 18721 |
| 109 | Cerebellum_9_L     | 2.031  | 0.797  | 3.265  | 0.630 | 3.226  | 0.024  | 1.26E-03 | 18651 | 0.449  | -0.332 | 1.229 | 0.398 | 1.126  | 0.008  | 2.60E-01 | 18721 |
| 110 | Cerebellum_9_R     | 2.072  | 0.859  | 3.285  | 0.619 | 3.348  | 0.025  | 8.15E-04 | 18651 | 0.611  | -0.157 | 1.378 | 0.392 | 1.560  | 0.011  | 1.19E-01 | 18721 |
| 111 | Cerebellum_10_L    | 0.063  | -0.025 | 0.151  | 0.045 | 1.408  | 0.010  | 1.59E-01 | 18651 | -0.016 | -0.071 | 0.040 | 0.028 | -0.559 | -0.004 | 5.76E-01 | 18721 |
| 112 | Cerebellum_10_R    | 0.061  | -0.030 | 0.152  | 0.046 | 1.314  | 0.010  | 1.89E-01 | 18651 | 0.036  | -0.022 | 0.093 | 0.029 | 1.218  | 0.009  | 2.23E-01 | 18721 |
| 113 | Vermis_1_2         | 0.030  | -0.027 | 0.087  | 0.029 | 1.035  | 0.008  | 3.01E-01 | 18651 | 0.104  | 0.068  | 0.140 | 0.018 | 5.692  | 0.042  | 1.28E-08 | 18721 |
| 114 | Vermis_3           | 0.149  | -0.078 | 0.375  | 0.116 | 1.288  | 0.009  | 1.98E-01 | 18651 | 0.411  | 0.268  | 0.554 | 0.073 | 5.630  | 0.041  | 1.82E-08 | 18721 |
| 115 | Vermis_4_5         | 0.747  | 0.082  | 1.413  | 0.340 | 2.201  | 0.016  | 2.77E-02 | 18651 | 0.531  | 0.110  | 0.951 | 0.214 | 2.475  | 0.018  | 1.33E-02 | 18721 |
| 116 | Vermis_6           | 0.385  | 0.015  | 0.756  | 0.189 | 2.039  | 0.015  | 4.14E-02 | 18651 | 0.103  | -0.131 | 0.337 | 0.119 | 0.866  | 0.006  | 3.87E-01 | 18721 |
| 117 | Vermis_7           | 0.268  | 0.058  | 0.477  | 0.107 | 2.504  | 0.018  | 1.23E-02 | 18651 | 0.098  | -0.034 | 0.231 | 0.068 | 1.457  | 0.011  | 1.45E-01 | 18721 |
| 118 | Vermis_8           | 0.552  | 0.208  | 0.896  | 0.176 | 3.145  | 0.023  | 1.66E-03 | 18651 | 0.042  | -0.176 | 0.259 | 0.111 | 0.374  | 0.003  | 7.08E-01 | 18721 |
| 119 | Vermis_9           | 0.481  | 0.203  | 0.760  | 0.142 | 3.384  | 0.025  | 7.15E-04 | 18651 | 0.127  | -0.050 | 0.303 | 0.090 | 1.409  | 0.010  | 1.59E-01 | 18721 |
| 120 | Vermis_10          | 0.082  | 0.004  | 0.160  | 0.040 | 2.065  | 0.015  | 3.90E-02 | 18651 | -0.005 | -0.054 | 0.045 | 0.025 | -0.180 | -0.001 | 8.57E-01 | 18721 |
| 121 | Tha_AV_L           | -0.034 | -0.065 | -0.003 | 0.016 | -2.156 | -0.016 | 3.11E-02 | 18651 | 0.040  | 0.020  | 0.060 | 0.010 | 3.965  | 0.029  | 7.36E-05 | 18721 |
| 122 | Tha_AV_R           | -0.057 | -0.101 | -0.012 | 0.023 | -2.504 | -0.018 | 1.23E-02 | 18651 | 0.061  | 0.033  | 0.089 | 0.014 | 4.248  | 0.031  | 2.17E-05 | 18721 |
| 123 | Tha_LP_L           | -0.065 | -0.100 | -0.030 | 0.018 | -3.691 | -0.027 | 2.24E-04 | 18651 | 0.067  | 0.045  | 0.088 | 0.011 | 5.982  | 0.044  | 2.25E-09 | 18721 |
| 124 | Tha_LP_R           | -0.127 | -0.172 | -0.082 | 0.023 | -5.529 | -0.040 | 3.27E-08 | 18651 | 0.100  | 0.071  | 0.128 | 0.014 | 6.874  | 0.050  | 6.44E-12 | 18721 |
| 125 | Tha_VA_L           | 0.011  | -0.026 | 0.048  | 0.019 | 0.589  | 0.004  | 5.56E-01 | 18651 | -0.009 | -0.032 | 0.014 | 0.012 | -0.761 | -0.006 | 4.47E-01 | 18721 |
| 126 | Tha_VA_R           | 0.013  | -0.033 | 0.058  | 0.023 | 0.544  | 0.004  | 5.86E-01 | 18651 | 0.012  | -0.016 | 0.041 | 0.015 | 0.848  | 0.006  | 3.97E-01 | 18721 |
| 127 | Tha_VL_L           | -0.053 | -0.157 | 0.052  | 0.053 | -0.986 | -0.007 | 3.24E-01 | 18651 | 0.091  | 0.025  | 0.158 | 0.034 | 2.704  | 0.020  | 6.85E-03 | 18721 |
| 128 | Tha_VL_R           | -0.227 | -0.366 | -0.087 | 0.071 | -3.189 | -0.023 | 1.43E-03 | 18651 | 0.244  | 0.156  | 0.332 | 0.045 | 5.434  | 0.040  | 5.59E-08 | 18721 |
| 129 | Tha_VPL_L          | -0.313 | -0.438 | -0.189 | 0.064 | -4.927 | -0.036 | 8.43E-07 | 18651 | 0.184  | 0.106  | 0.263 | 0.040 | 4.585  | 0.033  | 4.58E-06 | 18721 |
| 130 | Tha_VPL_R          | -0.400 | -0.531 | -0.269 | 0.067 | -5.986 | -0.044 | 2.19E-09 | 18651 | 0.231  | 0.148  | 0.314 | 0.042 | 5.461  | 0.040  | 4.78E-08 | 18721 |
| 131 | Tha_IL_L           | -0.197 | -0.251 | -0.143 | 0.028 | -7.174 | -0.052 | 7.57E-13 | 18651 | 0.134  | 0.100  | 0.168 | 0.017 | 7.726  | 0.056  | 1.16E-14 | 18721 |
| 132 | Tha_IL_R           | -0.248 | -0.310 | -0.187 | 0.031 | -7.964 | -0.058 | 1.76E-15 | 18651 | 0.154  | 0.115  | 0.192 | 0.020 | 7.793  | 0.057  | 6.90E-15 | 18721 |
| 133 | Tha_Re_L           | 0.000  | 0.000  | 0.000  | 0.000 | 0.290  | 0.002  | 7.72E-01 | 18651 | 0.000  | 0.000  | 0.001 | 0.000 | 4.907  | 0.036  | 9.33E-07 | 18721 |
| 134 | Tha_Re_R           | -0.002 | -0.004 | 0.000  | 0.001 | -2.476 | -0.018 | 1.33E-02 | 18651 | 0.003  | 0.002  | 0.005 | 0.001 | 5.858  | 0.043  | 4.76E-09 | 18721 |
| 135 | Tha_MDm_L          | -1.729 | -2.129 | -1.330 | 0.204 | -8.491 | -0.062 | 2.20E-17 | 18651 | 1.118  | 0.865  | 1.370 | 0.129 | 8.682  | 0.063  | 4.20E-18 | 18721 |
| 136 | Tha_MDm_R          | -2.073 | -2.537 | -1.610 | 0.237 | -8.762 | -0.064 | 2.07E-18 | 18651 | 1.206  | 0.912  | 1.499 | 0.150 | 8.057  | 0.059  | 8.30E-16 | 18721 |
| 137 | Tha_MDI_L          | -0.263 | -0.332 | -0.193 | 0.035 | -7.439 | -0.054 | 1.06E-13 | 18651 | 0.191  | 0.148  | 0.235 | 0.022 | 8.581  | 0.063  | 1.02E-17 | 18721 |
| 138 | Tha_MDI_R          | -0.337 | -0.415 | -0.258 | 0.040 | -8.404 | -0.061 | 4.61E-17 | 18651 | 0.205  | 0.155  | 0.255 | 0.025 | 8.092  | 0.059  | 6.20E-16 | 18721 |
| 139 | Tha_LGN_L          | -0.012 | -0.023 | -0.002 | 0.005 | -2.308 | -0.017 | 2.10E-02 | 18651 | 0.023  | 0.016  | 0.029 | 0.003 | 6.752  | 0.049  | 1.50E-11 | 18721 |
| 140 | Tha_LGN_R          | -0.039 | -0.061 | -0.016 | 0.011 | -3.406 | -0.025 | 6.60E-04 | 18651 | 0.057  | 0.043  | 0.071 | 0.007 | 7.923  | 0.058  | 2.45E-15 | 18721 |
| 141 | Tha_MGN_L          | -0.052 | -0.071 | -0.033 | 0.010 | -5.429 | -0.040 | 5.74E-08 | 18651 | 0.051  | 0.039  | 0.063 | 0.006 | 8.425  | 0.061  | 3.87E-17 | 18721 |
| 142 | Tha_MGN_R          | -0.059 | -0.080 | -0.039 | 0.010 | -5.714 | -0.042 | 1.12E-08 | 18651 | 0.052  | 0.039  | 0.065 | 0.007 | 7.903  | 0.058  | 2.88E-15 | 18721 |
| 143 | Tha_PuA_L          | -0.066 | -0.089 | -0.044 | 0.011 | -5.890 | -0.043 | 3.92E-09 | 18651 | 0.060  | 0.046  | 0.074 | 0.007 | 8.453  | 0.062  | 3.04E-17 | 18721 |

|     |            |        |        |        |       |        |        |          |       |       |       |       |       |       |       |          |       |
|-----|------------|--------|--------|--------|-------|--------|--------|----------|-------|-------|-------|-------|-------|-------|-------|----------|-------|
| 144 | Thal_PuA_R | -0.147 | -0.193 | -0.101 | 0.023 | -6.271 | -0.046 | 3.68E-10 | 18651 | 0.123 | 0.094 | 0.153 | 0.015 | 8.330 | 0.061 | 8.65E-17 | 18721 |
| 145 | Thal_PuM_L | -1.689 | -2.128 | -1.249 | 0.224 | -7.534 | -0.055 | 5.15E-14 | 18651 | 1.138 | 0.860 | 1.415 | 0.142 | 8.026 | 0.059 | 1.06E-15 | 18721 |
| 146 | Thal_PuM_R | -2.111 | -2.659 | -1.564 | 0.279 | -7.559 | -0.055 | 4.24E-14 | 18651 | 1.360 | 1.014 | 1.706 | 0.177 | 7.700 | 0.056 | 1.42E-14 | 18721 |
| 147 | Thal_PuL_L | -0.326 | -0.406 | -0.246 | 0.041 | -7.968 | -0.058 | 1.71E-15 | 18651 | 0.197 | 0.147 | 0.248 | 0.026 | 7.630 | 0.056 | 2.45E-14 | 18721 |
| 148 | Thal_PuL_R | -0.526 | -0.653 | -0.398 | 0.065 | -8.082 | -0.059 | 6.74E-16 | 18651 | 0.301 | 0.220 | 0.382 | 0.041 | 7.315 | 0.053 | 2.69E-13 | 18721 |
| 149 | Thal_PuL_L | -0.043 | -0.065 | -0.021 | 0.011 | -3.864 | -0.028 | 1.12E-04 | 18651 | 0.023 | 0.009 | 0.037 | 0.007 | 3.286 | 0.024 | 1.02E-03 | 18721 |
| 150 | Thal_PuL_R | -0.062 | -0.091 | -0.033 | 0.015 | -4.224 | -0.031 | 2.41E-05 | 18651 | 0.037 | 0.019 | 0.056 | 0.009 | 3.999 | 0.029 | 6.39E-05 | 18721 |
| 151 | ACC_sub_L  | -0.527 | -0.778 | -0.275 | 0.128 | -4.102 | -0.030 | 4.11E-05 | 18651 | 0.430 | 0.271 | 0.589 | 0.081 | 5.298 | 0.039 | 1.18E-07 | 18721 |
| 152 | ACC_sub_R  | -0.475 | -0.710 | -0.240 | 0.120 | -3.959 | -0.029 | 7.57E-05 | 18651 | 0.315 | 0.166 | 0.464 | 0.076 | 4.148 | 0.030 | 3.37E-05 | 18721 |
| 153 | ACC_pre_L  | -1.970 | -2.615 | -1.325 | 0.329 | -5.983 | -0.044 | 2.23E-09 | 18651 | 1.481 | 1.073 | 1.889 | 0.208 | 7.119 | 0.052 | 1.12E-12 | 18721 |
| 154 | ACC_pre_R  | -1.626 | -2.247 | -1.004 | 0.317 | -5.126 | -0.038 | 2.99E-07 | 18651 | 1.268 | 0.875 | 1.660 | 0.200 | 6.326 | 0.046 | 2.57E-10 | 18721 |
| 155 | ACC_sup_L  | -2.337 | -3.038 | -1.636 | 0.358 | -6.535 | -0.048 | 6.54E-11 | 18651 | 1.646 | 1.203 | 2.089 | 0.226 | 7.281 | 0.053 | 3.45E-13 | 18721 |
| 156 | ACC_sup_R  | -1.553 | -2.280 | -0.827 | 0.371 | -4.191 | -0.031 | 2.79E-05 | 18651 | 0.961 | 0.502 | 1.421 | 0.234 | 4.101 | 0.030 | 4.12E-05 | 18721 |
| 157 | N_Acc_L    | -0.306 | -0.517 | -0.095 | 0.108 | -2.840 | -0.021 | 4.51E-03 | 18651 | 0.362 | 0.229 | 0.496 | 0.068 | 5.321 | 0.039 | 1.04E-07 | 18721 |
| 158 | N_Acc_R    | -0.331 | -0.513 | -0.148 | 0.093 | -3.546 | -0.026 | 3.92E-04 | 18651 | 0.248 | 0.133 | 0.364 | 0.059 | 4.213 | 0.031 | 2.54E-05 | 18721 |
| 159 | VTA_L      | -0.012 | -0.019 | -0.005 | 0.004 | -3.185 | -0.023 | 1.45E-03 | 18651 | 0.014 | 0.010 | 0.019 | 0.002 | 5.931 | 0.043 | 3.07E-09 | 18721 |
| 160 | VTA_R      | -0.009 | -0.016 | -0.003 | 0.003 | -2.695 | -0.020 | 7.04E-03 | 18651 | 0.015 | 0.011 | 0.019 | 0.002 | 7.057 | 0.052 | 1.76E-12 | 18721 |
| 161 | SN_pc_L    | -0.015 | -0.027 | -0.003 | 0.006 | -2.493 | -0.018 | 1.27E-02 | 18651 | 0.017 | 0.010 | 0.025 | 0.004 | 4.553 | 0.033 | 5.32E-06 | 18721 |
| 162 | SN_pc_R    | -0.029 | -0.044 | -0.013 | 0.008 | -3.595 | -0.026 | 3.26E-04 | 18651 | 0.025 | 0.015 | 0.035 | 0.005 | 4.978 | 0.036 | 6.48E-07 | 18721 |
| 163 | SN_pr_L    | -0.005 | -0.022 | 0.011  | 0.008 | -0.652 | -0.005 | 5.14E-01 | 18651 | 0.014 | 0.004 | 0.025 | 0.005 | 2.775 | 0.020 | 5.52E-03 | 18721 |
| 164 | SN_pr_R    | -0.026 | -0.044 | -0.008 | 0.009 | -2.795 | -0.020 | 5.20E-03 | 18651 | 0.015 | 0.004 | 0.027 | 0.006 | 2.615 | 0.019 | 8.92E-03 | 18721 |
| 165 | Red_N_L    | -0.021 | -0.041 | -0.001 | 0.010 | -2.031 | -0.015 | 4.23E-02 | 18651 | 0.042 | 0.029 | 0.055 | 0.006 | 6.525 | 0.048 | 6.97E-11 | 18721 |
| 166 | Red_N_R    | -0.015 | -0.037 | 0.006  | 0.011 | -1.396 | -0.010 | 1.63E-01 | 18651 | 0.044 | 0.031 | 0.058 | 0.007 | 6.329 | 0.046 | 2.52E-10 | 18721 |
| 167 | LC_L       | 0.004  | -0.004 | 0.011  | 0.004 | 1.038  | 0.008  | 2.99E-01 | 18651 | 0.007 | 0.002 | 0.011 | 0.002 | 2.788 | 0.020 | 5.31E-03 | 18721 |
| 168 | LC_R       | 0.001  | -0.007 | 0.010  | 0.004 | 0.352  | 0.003  | 7.25E-01 | 18651 | 0.009 | 0.004 | 0.014 | 0.003 | 3.349 | 0.024 | 8.14E-04 | 18721 |
| 169 | Raphe_D    | -0.050 | -0.079 | -0.021 | 0.015 | -3.380 | -0.025 | 7.25E-04 | 18651 | 0.087 | 0.069 | 0.105 | 0.009 | 9.351 | 0.068 | 9.67E-21 | 18721 |
| 170 | Raphe_M    | -0.006 | -0.015 | 0.003  | 0.004 | -1.324 | -0.010 | 1.86E-01 | 18651 | 0.019 | 0.014 | 0.025 | 0.003 | 6.827 | 0.050 | 8.96E-12 | 18721 |

## Tea intake

## Water intake

| Number | AAL 3 region        | beta   | 95%CI l | 95%CI h | se     | t      | r      | p        | df.e  | beta     | 95%CI l  | 95%CI h | se     | t      | r      | p        | df.e  |
|--------|---------------------|--------|---------|---------|--------|--------|--------|----------|-------|----------|----------|---------|--------|--------|--------|----------|-------|
| 0      | Total brain         | 64.706 | 11.326  | 118.087 | 27.234 | 2.376  | 0.017  | 1.75E-02 | 18672 | -160.661 | -231.380 | -89.943 | 36.079 | -4.453 | -0.033 | 8.52E-06 | 18637 |
| 1      | Precentral_L        | 1.057  | -0.822  | 2.935   | 0.958  | 1.103  | 0.008  | 2.70E-01 | 18672 | -1.198   | -3.691   | 1.294   | 1.272  | -0.943 | -0.007 | 3.46E-01 | 18637 |
| 2      | Precentral_R        | 1.623  | -0.099  | 3.345   | 0.879  | 1.848  | 0.014  | 6.47E-02 | 18672 | -2.650   | -4.934   | -0.367  | 1.165  | -2.275 | -0.017 | 2.29E-02 | 18637 |
| 3      | Frontal_Sup_2_L     | 1.161  | -0.822  | 3.144   | 1.012  | 1.148  | 0.008  | 2.51E-01 | 18672 | -2.270   | -4.901   | 0.360   | 1.342  | -1.692 | -0.012 | 9.07E-02 | 18637 |
| 4      | Frontal_Sup_2_R     | 2.501  | 0.315   | 4.687   | 1.115  | 2.243  | 0.016  | 2.49E-02 | 18672 | -1.645   | -4.546   | 1.255   | 1.480  | -1.112 | -0.008 | 2.66E-01 | 18637 |
| 5      | Frontal_Mid_2_L     | 1.369  | -0.714  | 3.453   | 1.063  | 1.288  | 0.009  | 1.98E-01 | 18672 | -0.767   | -3.530   | 1.996   | 1.409  | -0.544 | -0.004 | 5.86E-01 | 18637 |
| 6      | Frontal_Mid_2_R     | 1.265  | -1.092  | 3.622   | 1.202  | 1.052  | 0.008  | 2.93E-01 | 18672 | -1.688   | -4.812   | 1.436   | 1.594  | -1.059 | -0.008 | 2.90E-01 | 18637 |
| 7      | Frontal_Inf_Oper_L  | 0.181  | -0.435  | 0.796   | 0.314  | 0.575  | 0.004  | 5.65E-01 | 18672 | -0.692   | -1.508   | 0.125   | 0.417  | -1.660 | -0.012 | 9.68E-02 | 18637 |
| 8      | Frontal_Inf_Oper_R  | 0.288  | -0.484  | 1.059   | 0.394  | 0.730  | 0.005  | 4.65E-01 | 18672 | -1.215   | -2.238   | -0.192  | 0.522  | -2.327 | -0.017 | 2.00E-02 | 18637 |
| 9      | Frontal_Inf_Tri_L   | 0.915  | -0.393  | 2.222   | 0.667  | 1.371  | 0.010  | 1.70E-01 | 18672 | -1.906   | -3.639   | -0.172  | 0.884  | -2.155 | -0.016 | 3.12E-02 | 18637 |
| 10     | Frontal_Inf_Tri_R   | 0.827  | -0.199  | 1.853   | 0.524  | 1.580  | 0.012  | 1.14E-01 | 18672 | -1.205   | -2.566   | 0.156   | 0.694  | -1.736 | -0.013 | 8.26E-02 | 18637 |
| 11     | Frontal_Inf_Orb_2_L | -0.044 | -0.436  | 0.347   | 0.199  | -0.223 | -0.002 | 8.23E-01 | 18672 | -0.265   | -0.784   | 0.253   | 0.264  | -1.004 | -0.007 | 3.15E-01 | 18637 |
| 12     | Frontal_Inf_Orb_2_R | -0.040 | -0.449  | 0.369   | 0.209  | -0.191 | -0.001 | 8.49E-01 | 18672 | -0.600   | -1.142   | -0.058  | 0.276  | -2.170 | -0.016 | 3.00E-02 | 18637 |
| 13     | Rolandic_Oper_L     | 0.359  | -0.232  | 0.951   | 0.302  | 1.190  | 0.009  | 2.34E-01 | 18672 | -1.191   | -1.975   | -0.408  | 0.400  | -2.980 | -0.022 | 2.89E-03 | 18637 |
| 14     | Rolandic_Oper_R     | 1.460  | 0.615   | 2.305   | 0.431  | 3.386  | 0.025  | 7.10E-04 | 18672 | -1.433   | -2.554   | -0.312  | 0.572  | -2.505 | -0.018 | 1.23E-02 | 18637 |
| 15     | Supp_Motor_Area_L   | 0.519  | -0.886  | 1.925   | 0.717  | 0.724  | 0.005  | 4.69E-01 | 18672 | 1.022    | -0.842   | 2.885   | 0.951  | 1.075  | 0.008  | 2.83E-01 | 18637 |
| 16     | Supp_Motor_Area_R   | 0.524  | -1.028  | 2.077   | 0.792  | 0.662  | 0.005  | 5.08E-01 | 18672 | 1.440    | -0.619   | 3.499   | 1.050  | 1.371  | 0.010  | 1.71E-01 | 18637 |
| 17     | Olfactory_L         | -0.060 | -0.269  | 0.149   | 0.107  | -0.560 | -0.004 | 5.75E-01 | 18672 | -0.226   | -0.503   | 0.051   | 0.141  | -1.598 | -0.012 | 1.10E-01 | 18637 |
| 18     | Olfactory_R         | -0.075 | -0.284  | 0.134   | 0.107  | -0.701 | -0.005 | 4.83E-01 | 18672 | -0.304   | -0.581   | -0.026  | 0.142  | -2.145 | -0.016 | 3.19E-02 | 18637 |

|    |                      |        |        |       |       |        |        |          |       |        |        |        |       |        |        |          |       |
|----|----------------------|--------|--------|-------|-------|--------|--------|----------|-------|--------|--------|--------|-------|--------|--------|----------|-------|
| 19 | Frontal_Sup_Medial_L | 0.278  | -1.039 | 1.595 | 0.672 | 0.413  | 0.003  | 6.79E-01 | 18672 | -0.817 | -2.563 | 0.929  | 0.891 | -0.918 | -0.007 | 3.59E-01 | 18637 |
| 20 | Frontal_Sup_Medial_R | 0.311  | -0.648 | 1.270 | 0.489 | 0.636  | 0.005  | 5.25E-01 | 18672 | -1.338 | -2.610 | -0.067 | 0.649 | -2.064 | -0.015 | 3.91E-02 | 18637 |
| 21 | Frontal_Med_Orb_L    | 0.374  | -0.118 | 0.866 | 0.251 | 1.490  | 0.011  | 1.36E-01 | 18672 | -0.588 | -1.240 | 0.064  | 0.333 | -1.769 | -0.013 | 7.70E-02 | 18637 |
| 22 | Frontal_Med_Orb_R    | 0.555  | -0.050 | 1.159 | 0.308 | 1.798  | 0.013  | 7.21E-02 | 18672 | -0.929 | -1.729 | -0.128 | 0.408 | -2.273 | -0.017 | 2.30E-02 | 18637 |
| 23 | Rectus_L             | 0.598  | 0.089  | 1.107 | 0.260 | 2.301  | 0.017  | 2.14E-02 | 18672 | -0.642 | -1.316 | 0.032  | 0.344 | -1.866 | -0.014 | 6.21E-02 | 18637 |
| 24 | Rectus_R             | 0.488  | 0.017  | 0.959 | 0.240 | 2.029  | 0.015  | 4.24E-02 | 18672 | -0.593 | -1.217 | 0.031  | 0.318 | -1.862 | -0.014 | 6.25E-02 | 18637 |
| 25 | OFCmed_L             | 0.167  | -0.128 | 0.462 | 0.151 | 1.110  | 0.008  | 2.67E-01 | 18672 | -0.389 | -0.780 | 0.002  | 0.200 | -1.949 | -0.014 | 5.13E-02 | 18637 |
| 26 | OFCmed_R             | -0.011 | -0.355 | 0.333 | 0.175 | -0.065 | 0.000  | 9.49E-01 | 18672 | -0.450 | -0.906 | 0.006  | 0.233 | -1.935 | -0.014 | 5.29E-02 | 18637 |
| 27 | OFCant_L             | 0.148  | -0.194 | 0.489 | 0.174 | 0.848  | 0.006  | 3.97E-01 | 18672 | -0.433 | -0.885 | 0.020  | 0.231 | -1.875 | -0.014 | 6.08E-02 | 18637 |
| 28 | OFCant_R             | 0.150  | -0.301 | 0.601 | 0.230 | 0.652  | 0.005  | 5.14E-01 | 18672 | -1.048 | -1.646 | -0.450 | 0.305 | -3.436 | -0.025 | 5.92E-04 | 18637 |
| 29 | OFCpost_L            | 0.030  | -0.398 | 0.457 | 0.218 | 0.135  | 0.001  | 8.92E-01 | 18672 | -0.525 | -1.092 | 0.041  | 0.289 | -1.817 | -0.013 | 6.93E-02 | 18637 |
| 30 | OFCpost_R            | 0.090  | -0.305 | 0.485 | 0.201 | 0.446  | 0.003  | 6.56E-01 | 18672 | -0.866 | -1.390 | -0.342 | 0.267 | -3.240 | -0.024 | 1.20E-03 | 18637 |
| 31 | OFClat_L             | -0.021 | -0.166 | 0.123 | 0.074 | -0.291 | -0.002 | 7.71E-01 | 18672 | -0.065 | -0.256 | 0.126  | 0.098 | -0.664 | -0.005 | 5.07E-01 | 18637 |
| 32 | OFClat_R             | -0.002 | -0.124 | 0.119 | 0.062 | -0.039 | 0.000  | 9.69E-01 | 18672 | -0.334 | -0.496 | -0.173 | 0.082 | -4.056 | -0.030 | 5.02E-05 | 18637 |
| 33 | Insula_L             | 0.368  | -0.954 | 1.690 | 0.674 | 0.545  | 0.004  | 5.85E-01 | 18672 | -2.928 | -4.679 | -1.177 | 0.893 | -3.277 | -0.024 | 1.05E-03 | 18637 |
| 34 | Insula_R             | 0.730  | -0.558 | 2.018 | 0.657 | 1.111  | 0.008  | 2.67E-01 | 18672 | -3.521 | -5.227 | -1.815 | 0.870 | -4.046 | -0.030 | 5.24E-05 | 18637 |
| 37 | Cingulate_Mid_L      | 1.664  | 0.548  | 2.781 | 0.570 | 2.921  | 0.021  | 3.49E-03 | 18672 | -1.340 | -2.820 | 0.140  | 0.755 | -1.775 | -0.013 | 7.60E-02 | 18637 |
| 38 | Cingulate_Mid_R      | 1.740  | 0.549  | 2.932 | 0.608 | 2.863  | 0.021  | 4.20E-03 | 18672 | -1.464 | -3.043 | 0.115  | 0.805 | -1.818 | -0.013 | 6.91E-02 | 18637 |
| 39 | Cingulate_Post_L     | 0.260  | -0.082 | 0.601 | 0.174 | 1.490  | 0.011  | 1.36E-01 | 18672 | -0.699 | -1.151 | -0.246 | 0.231 | -3.024 | -0.022 | 2.49E-02 | 18637 |
| 40 | Cingulate_Post_R     | 0.133  | -0.056 | 0.323 | 0.097 | 1.380  | 0.010  | 1.68E-01 | 18672 | -0.235 | -0.486 | 0.016  | 0.128 | -1.833 | -0.013 | 6.68E-02 | 18637 |
| 41 | Hippocampus_L        | -0.086 | -0.638 | 0.466 | 0.282 | -0.305 | -0.002 | 7.60E-01 | 18672 | -1.293 | -2.025 | -0.561 | 0.374 | -3.461 | -0.025 | 5.40E-04 | 18637 |
| 42 | Hippocampus_R        | -0.311 | -0.884 | 0.261 | 0.292 | -1.065 | -0.008 | 2.87E-01 | 18672 | -0.712 | -1.472 | 0.047  | 0.388 | -1.838 | -0.013 | 6.60E-02 | 18637 |
| 43 | ParaHippocampal_L    | 0.095  | -0.395 | 0.586 | 0.250 | 0.381  | 0.003  | 7.03E-01 | 18672 | -1.052 | -1.702 | -0.402 | 0.332 | -3.172 | -0.023 | 1.52E-03 | 18637 |
| 44 | ParaHippocampal_R    | 0.142  | -0.477 | 0.760 | 0.316 | 0.449  | 0.003  | 6.54E-01 | 18672 | -1.392 | -2.213 | -0.572 | 0.419 | -3.327 | -0.024 | 8.80E-04 | 18637 |
| 45 | Amygdala_L           | -0.016 | -0.206 | 0.175 | 0.097 | -0.164 | -0.001 | 8.70E-01 | 18672 | -0.556 | -0.808 | -0.303 | 0.129 | -4.313 | -0.032 | 1.62E-05 | 18637 |
| 46 | Amygdala_R           | -0.023 | -0.218 | 0.173 | 0.100 | -0.226 | -0.002 | 8.21E-01 | 18672 | -0.634 | -0.892 | -0.375 | 0.132 | -4.806 | -0.035 | 1.55E-06 | 18637 |
| 47 | Calcarine_L          | 0.370  | -1.449 | 2.189 | 0.928 | 0.399  | 0.003  | 6.90E-01 | 18672 | -0.325 | -2.736 | 2.086  | 1.230 | -0.264 | -0.002 | 7.92E-01 | 18637 |
| 48 | Calcarine_R          | 0.894  | -0.626 | 2.414 | 0.776 | 1.153  | 0.008  | 2.49E-01 | 18672 | -0.626 | -2.642 | 1.390  | 1.028 | -0.608 | -0.004 | 5.43E-01 | 18637 |
| 49 | Cuneus_L             | 0.349  | -0.792 | 1.489 | 0.582 | 0.599  | 0.004  | 5.49E-01 | 18672 | -0.665 | -2.178 | 0.849  | 0.772 | -0.861 | -0.006 | 3.89E-01 | 18637 |
| 50 | Cuneus_R             | 0.442  | -0.431 | 1.314 | 0.445 | 0.992  | 0.007  | 3.21E-01 | 18672 | -1.257 | -2.416 | -0.099 | 0.591 | -2.128 | -0.016 | 3.34E-02 | 18637 |
| 51 | Lingual_L            | 0.743  | -0.351 | 1.836 | 0.558 | 1.332  | 0.010  | 1.83E-01 | 18672 | -1.109 | -2.560 | 0.342  | 0.740 | -1.498 | -0.011 | 1.34E-01 | 18637 |
| 52 | Lingual_R            | 1.086  | -0.060 | 2.232 | 0.585 | 1.858  | 0.014  | 6.32E-02 | 18672 | -1.866 | -3.385 | -0.347 | 0.775 | -2.408 | -0.018 | 1.61E-02 | 18637 |
| 53 | Occipital_Sup_L      | 1.623  | 0.871  | 2.374 | 0.383 | 4.233  | 0.031  | 2.31E-05 | 18672 | -1.491 | -2.488 | -0.494 | 0.509 | -2.931 | -0.021 | 3.38E-03 | 18637 |
| 54 | Occipital_Sup_R      | 1.008  | 0.193  | 1.823 | 0.416 | 2.425  | 0.018  | 1.53E-02 | 18672 | -0.929 | -2.011 | 0.152  | 0.552 | -1.685 | -0.012 | 9.21E-02 | 18637 |
| 55 | Occipital_Mid_L      | 0.962  | -0.800 | 2.724 | 0.899 | 1.070  | 0.008  | 2.85E-01 | 18672 | -4.061 | -6.397 | -1.726 | 1.192 | -3.409 | -0.025 | 6.55E-04 | 18637 |
| 56 | Occipital_Mid_R      | 1.508  | 0.282  | 2.734 | 0.625 | 2.411  | 0.018  | 1.59E-02 | 18672 | -1.392 | -3.019 | 0.235  | 0.830 | -1.677 | -0.012 | 9.36E-02 | 18637 |
| 57 | Occipital_Inf_L      | 0.302  | -0.283 | 0.886 | 0.298 | 1.011  | 0.007  | 3.12E-01 | 18672 | -1.134 | -1.910 | -0.359 | 0.396 | -2.867 | -0.021 | 4.15E-03 | 18637 |
| 58 | Occipital_Inf_R      | 0.542  | -0.133 | 1.218 | 0.345 | 1.573  | 0.012  | 1.16E-01 | 18672 | -1.015 | -1.911 | -0.119 | 0.457 | -2.219 | -0.016 | 2.65E-02 | 18637 |
| 59 | Fusiform_L           | 1.379  | 0.099  | 2.659 | 0.653 | 2.111  | 0.015  | 3.48E-02 | 18672 | -2.638 | -4.334 | -0.942 | 0.865 | -3.049 | -0.022 | 2.30E-03 | 18637 |
| 60 | Fusiform_R           | 1.245  | -0.163 | 2.653 | 0.718 | 1.734  | 0.013  | 8.30E-02 | 18672 | -2.328 | -4.194 | -0.463 | 0.952 | -2.446 | -0.018 | 1.44E-02 | 18637 |
| 61 | Postcentral_L        | 2.865  | 0.938  | 4.791 | 0.983 | 2.915  | 0.021  | 3.56E-03 | 18672 | -3.135 | -5.688 | -0.581 | 1.303 | -2.406 | -0.018 | 1.61E-02 | 18637 |
| 62 | Postcentral_R        | 2.213  | 0.238  | 4.188 | 1.008 | 2.196  | 0.016  | 2.81E-02 | 18672 | -2.163 | -4.781 | 0.456  | 1.336 | -1.619 | -0.012 | 1.05E-01 | 18637 |
| 63 | Parietal_Sup_L       | 0.097  | -1.013 | 1.207 | 0.566 | 0.172  | 0.001  | 8.63E-01 | 18672 | -0.350 | -1.822 | 1.122  | 0.751 | -0.466 | -0.003 | 6.41E-01 | 18637 |
| 64 | Parietal_Sup_R       | -0.025 | -1.010 | 0.960 | 0.502 | -0.050 | 0.000  | 9.60E-01 | 18672 | 0.075  | -1.231 | 1.381  | 0.666 | 0.112  | 0.001  | 9.10E-01 | 18637 |
| 65 | Parietal_Inf_L       | 2.061  | 0.608  | 3.515 | 0.741 | 2.780  | 0.020  | 5.44E-03 | 18672 | -1.336 | -3.263 | 0.590  | 0.983 | -1.360 | -0.010 | 1.74E-01 | 18637 |
| 66 | Parietal_Inf_R       | 0.744  | -0.198 | 1.685 | 0.480 | 1.548  | 0.011  | 1.22E-01 | 18672 | -1.142 | -2.390 | 0.105  | 0.637 | -1.795 | -0.013 | 7.27E-02 | 18637 |
| 67 | SupraMarginal_L      | 1.112  | 0.260  | 1.963 | 0.434 | 2.560  | 0.019  | 1.05E-02 | 18672 | -1.063 | -2.193 | 0.066  | 0.576 | -1.845 | -0.014 | 6.50E-02 | 18637 |
| 68 | SupraMarginal_R      | 1.245  | 0.040  | 2.450 | 0.615 | 2.026  | 0.015  | 4.28E-02 | 18672 | -3.827 | -5.424 | -2.231 | 0.814 | -4.700 | -0.034 | 2.62E-06 | 18637 |

|     |                      |        |        |        |       |        |        |          |       |        |        |        |       |        |        |          |       |
|-----|----------------------|--------|--------|--------|-------|--------|--------|----------|-------|--------|--------|--------|-------|--------|--------|----------|-------|
| 69  | Angular_L            | 0.695  | -0.142 | 1.531  | 0.427 | 1.628  | 0.012  | 1.04E-01 | 18672 | -0.213 | -1.322 | 0.896  | 0.566 | -0.376 | -0.003 | 7.07E-01 | 18637 |
| 70  | Angular_R            | 0.925  | -0.196 | 2.047  | 0.572 | 1.617  | 0.012  | 1.06E-01 | 18672 | 0.013  | -1.475 | 1.501  | 0.759 | 0.017  | 0.000  | 9.86E-01 | 18637 |
| 71  | Precuneus_L          | 0.784  | -1.255 | 2.823  | 1.040 | 0.754  | 0.006  | 4.51E-01 | 18672 | -1.049 | -3.751 | 1.653  | 1.378 | -0.761 | -0.006 | 4.47E-01 | 18637 |
| 72  | Precuneus_R          | 0.905  | -0.912 | 2.721  | 0.927 | 0.976  | 0.007  | 3.29E-01 | 18672 | -2.415 | -4.821 | -0.009 | 1.228 | -1.967 | -0.014 | 4.92E-02 | 18637 |
| 73  | Paracentral_Lobule_L | -0.009 | -0.942 | 0.925  | 0.476 | -0.018 | 0.000  | 9.85E-01 | 18672 | 1.463  | 0.225  | 2.702  | 0.632 | 2.316  | 0.017  | 2.06E-02 | 18637 |
| 74  | Paracentral_Lobule_R | 0.056  | -0.612 | 0.725  | 0.341 | 0.165  | 0.001  | 8.69E-01 | 18672 | 0.363  | -0.523 | 1.250  | 0.452 | 0.803  | 0.006  | 4.22E-01 | 18637 |
| 75  | Caudate_L            | -0.677 | -1.423 | 0.069  | 0.380 | -1.780 | -0.013 | 7.51E-02 | 18672 | 0.094  | -0.895 | 1.082  | 0.504 | 0.185  | 0.001  | 8.53E-01 | 18637 |
| 76  | Caudate_R            | -1.022 | -1.866 | -0.178 | 0.430 | -2.374 | -0.017 | 1.76E-02 | 18672 | 0.450  | -0.669 | 1.568  | 0.571 | 0.788  | 0.006  | 4.31E-01 | 18637 |
| 77  | Putamen_L            | -1.893 | -3.026 | -0.761 | 0.578 | -3.278 | -0.024 | 1.05E-03 | 18672 | -2.619 | -4.120 | -1.117 | 0.766 | -3.419 | -0.025 | 6.30E-04 | 18637 |
| 78  | Putamen_R            | -1.829 | -2.982 | -0.676 | 0.588 | -3.108 | -0.023 | 1.89E-03 | 18672 | -2.335 | -3.865 | -0.806 | 0.780 | -2.992 | -0.022 | 2.77E-03 | 18637 |
| 79  | Pallidum_L           | -0.152 | -0.253 | -0.051 | 0.051 | -2.961 | -0.022 | 3.07E-03 | 18672 | -0.067 | -0.201 | 0.066  | 0.068 | -0.989 | -0.007 | 3.23E-01 | 18637 |
| 80  | Pallidum_R           | -0.215 | -0.326 | -0.105 | 0.056 | -3.822 | -0.028 | 1.33E-04 | 18672 | -0.078 | -0.224 | 0.069  | 0.075 | -1.042 | -0.008 | 2.97E-01 | 18637 |
| 83  | Heschl_L             | 0.262  | 0.058  | 0.467  | 0.104 | 2.519  | 0.018  | 1.18E-02 | 18672 | -0.451 | -0.722 | -0.180 | 0.138 | -3.265 | -0.024 | 1.10E-03 | 18637 |
| 84  | Heschl_R             | 0.438  | 0.210  | 0.666  | 0.116 | 3.769  | 0.028  | 1.65E-04 | 18672 | -0.618 | -0.920 | -0.315 | 0.154 | -4.005 | -0.029 | 6.22E-05 | 18637 |
| 85  | Temporal_Sup_L       | 2.096  | 0.622  | 3.570  | 0.752 | 2.788  | 0.020  | 5.31E-03 | 18672 | -3.855 | -5.810 | -1.900 | 0.997 | -3.866 | -0.028 | 1.11E-04 | 18637 |
| 86  | Temporal_Sup_R       | 1.571  | -0.060 | 3.202  | 0.832 | 1.887  | 0.014  | 5.91E-02 | 18672 | -5.537 | -7.698 | -3.376 | 1.103 | -5.022 | -0.037 | 5.16E-07 | 18637 |
| 87  | Temporal_Pole_Sup_L  | 0.349  | -0.349 | 1.047  | 0.356 | 0.979  | 0.007  | 3.28E-01 | 18672 | -1.570 | -2.496 | -0.645 | 0.472 | -3.327 | -0.024 | 8.80E-04 | 18637 |
| 88  | Temporal_Pole_Sup_R  | 0.439  | -0.297 | 1.174  | 0.375 | 1.169  | 0.009  | 2.42E-01 | 18672 | -1.399 | -2.373 | -0.425 | 0.497 | -2.814 | -0.021 | 4.89E-03 | 18637 |
| 89  | Temporal_Mid_L       | 2.311  | -0.145 | 4.768  | 1.253 | 1.844  | 0.013  | 6.52E-02 | 18672 | -6.087 | -9.342 | -2.832 | 1.661 | -3.665 | -0.027 | 2.48E-04 | 18637 |
| 90  | Temporal_Mid_R       | 2.304  | 0.122  | 4.485  | 1.113 | 2.070  | 0.015  | 3.85E-02 | 18672 | -6.033 | -8.922 | -3.144 | 1.474 | -4.093 | -0.030 | 4.27E-05 | 18637 |
| 91  | Temporal_Pole_Mid_L  | 0.732  | 0.146  | 1.318  | 0.299 | 2.447  | 0.018  | 1.44E-02 | 18672 | -0.574 | -1.351 | 0.204  | 0.397 | -1.445 | -0.011 | 1.48E-01 | 18637 |
| 92  | Temporal_Pole_Mid_R  | 1.252  | 0.540  | 1.965  | 0.364 | 3.444  | 0.025  | 5.74E-04 | 18672 | -1.441 | -2.386 | -0.495 | 0.482 | -2.987 | -0.022 | 2.82E-03 | 18637 |
| 93  | Temporal_Inf_L       | 0.521  | -1.167 | 2.210  | 0.861 | 0.605  | 0.004  | 5.45E-01 | 18672 | -3.898 | -6.135 | -1.660 | 1.142 | -3.414 | -0.025 | 6.42E-04 | 18637 |
| 94  | Temporal_Inf_R       | 1.377  | -0.464 | 3.218  | 0.939 | 1.466  | 0.011  | 1.43E-01 | 18672 | -4.749 | -7.189 | -2.309 | 1.245 | -3.816 | -0.028 | 1.36E-04 | 18637 |
| 95  | Cerebellum_Crus1_L   | -0.325 | -2.330 | 1.679  | 1.023 | -0.318 | -0.002 | 7.50E-01 | 18672 | -1.095 | -3.753 | 1.564  | 1.356 | -0.807 | -0.006 | 4.20E-01 | 18637 |
| 96  | Cerebellum_Crus1_R   | 0.014  | -2.030 | 2.059  | 1.043 | 0.014  | 0.000  | 9.89E-01 | 18672 | -1.602 | -4.315 | 1.110  | 1.384 | -1.158 | -0.008 | 2.47E-01 | 18637 |
| 97  | Cerebellum_Crus2_L   | 0.845  | -0.746 | 2.435  | 0.811 | 1.041  | 0.008  | 2.98E-01 | 18672 | -3.376 | -5.483 | -1.270 | 1.075 | -3.142 | -0.023 | 1.68E-03 | 18637 |
| 98  | Cerebellum_Crus2_R   | 0.709  | -0.762 | 2.180  | 0.751 | 0.945  | 0.007  | 3.45E-01 | 18672 | -3.887 | -5.837 | -1.938 | 0.995 | -3.909 | -0.029 | 9.31E-05 | 18637 |
| 99  | Cerebellum_3_L       | -0.124 | -0.230 | -0.017 | 0.054 | -2.271 | -0.017 | 2.32E-02 | 18672 | 0.023  | -0.119 | 0.164  | 0.072 | 0.312  | 0.002  | 7.55E-01 | 18637 |
| 100 | Cerebellum_3_R       | -0.067 | -0.211 | 0.077  | 0.073 | -0.915 | -0.007 | 3.60E-01 | 18672 | -0.019 | -0.210 | 0.172  | 0.098 | -0.195 | -0.001 | 8.45E-01 | 18637 |
| 101 | Cerebellum_4_5_L     | 0.532  | -0.332 | 1.395  | 0.440 | 1.207  | 0.009  | 2.27E-01 | 18672 | -0.477 | -1.623 | 0.668  | 0.584 | -0.817 | -0.006 | 4.14E-01 | 18637 |
| 102 | Cerebellum_4_5_R     | 0.745  | 0.041  | 1.448  | 0.359 | 2.076  | 0.015  | 3.80E-02 | 18672 | -0.434 | -1.367 | 0.500  | 0.476 | -0.911 | -0.007 | 3.62E-01 | 18637 |
| 103 | Cerebellum_6_L       | 1.050  | -0.441 | 2.542  | 0.761 | 1.380  | 0.010  | 1.68E-01 | 18672 | -1.685 | -3.664 | 0.293  | 1.009 | -1.670 | -0.012 | 9.49E-02 | 18637 |
| 104 | Cerebellum_6_R       | 0.988  | -0.583 | 2.560  | 0.802 | 1.233  | 0.009  | 2.18E-01 | 18672 | -1.695 | -3.781 | 0.390  | 1.064 | -1.593 | -0.012 | 1.11E-01 | 18637 |
| 105 | Cerebellum_7b_L      | 0.238  | -0.248 | 0.725  | 0.248 | 0.960  | 0.007  | 3.37E-01 | 18672 | -1.300 | -1.944 | -0.656 | 0.328 | -3.959 | -0.029 | 7.57E-05 | 18637 |
| 106 | Cerebellum_7b_R      | 0.379  | -0.103 | 0.861  | 0.246 | 1.542  | 0.011  | 1.23E-01 | 18672 | -1.213 | -1.851 | -0.574 | 0.326 | -3.723 | -0.027 | 1.97E-04 | 18637 |
| 107 | Cerebellum_8_L       | 0.953  | -0.591 | 2.497  | 0.788 | 1.210  | 0.009  | 2.26E-01 | 18672 | -3.833 | -5.878 | -1.788 | 1.043 | -3.674 | -0.027 | 2.39E-04 | 18637 |
| 108 | Cerebellum_8_R       | 0.657  | -1.353 | 2.666  | 1.025 | 0.641  | 0.005  | 5.22E-01 | 18672 | -5.704 | -8.366 | -3.041 | 1.359 | -4.198 | -0.031 | 2.70E-05 | 18637 |
| 109 | Cerebellum_9_L       | -0.462 | -1.335 | 0.411  | 0.445 | -1.038 | -0.008 | 2.99E-01 | 18672 | -1.376 | -2.532 | -0.219 | 0.590 | -2.332 | -0.017 | 1.97E-02 | 18637 |
| 110 | Cerebellum_9_R       | -0.676 | -1.534 | 0.182  | 0.438 | -1.545 | -0.011 | 1.22E-01 | 18672 | -1.262 | -2.399 | -0.124 | 0.580 | -2.174 | -0.016 | 2.97E-02 | 18637 |
| 111 | Cerebellum_10_L      | -0.029 | -0.091 | 0.033  | 0.032 | -0.917 | -0.007 | 3.59E-01 | 18672 | -0.058 | -0.141 | 0.024  | 0.042 | -1.393 | -0.010 | 1.64E-01 | 18637 |
| 112 | Cerebellum_10_R      | -0.050 | -0.115 | 0.014  | 0.033 | -1.527 | -0.011 | 1.27E-01 | 18672 | 0.025  | -0.060 | 0.111  | 0.044 | 0.576  | 0.004  | 5.65E-01 | 18637 |
| 113 | Vermis_1_2           | -0.068 | -0.108 | -0.028 | 0.021 | -3.319 | -0.024 | 9.07E-04 | 18672 | 0.010  | -0.044 | 0.063  | 0.027 | 0.361  | 0.003  | 7.18E-01 | 18637 |
| 114 | Vermis_3             | -0.162 | -0.322 | -0.002 | 0.082 | -1.989 | -0.015 | 4.68E-02 | 18672 | -0.071 | -0.283 | 0.142  | 0.108 | -0.653 | -0.005 | 5.14E-01 | 18637 |
| 115 | Vermis_4_5           | 0.015  | -0.455 | 0.485  | 0.240 | 0.061  | 0.000  | 9.51E-01 | 18672 | -0.023 | -0.647 | 0.602  | 0.319 | -0.072 | -0.001 | 9.43E-01 | 18637 |
| 116 | Vermis_6             | -0.117 | -0.379 | 0.145  | 0.134 | -0.875 | -0.006 | 3.82E-01 | 18672 | 0.058  | -0.290 | 0.405  | 0.177 | 0.325  | 0.002  | 7.45E-01 | 18637 |
| 117 | Vermis_7             | -0.151 | -0.299 | -0.003 | 0.076 | -1.998 | -0.015 | 4.57E-02 | 18672 | -0.018 | -0.214 | 0.179  | 0.100 | -0.178 | -0.001 | 8.59E-01 | 18637 |
| 118 | Vermis_8             | -0.239 | -0.482 | 0.004  | 0.124 | -1.926 | -0.014 | 5.42E-02 | 18672 | -0.282 | -0.605 | 0.041  | 0.165 | -1.714 | -0.013 | 8.66E-02 | 18637 |



|     |            |        |        |        |       |        |        |          |       |        |        |        |       |        |        |          |       |
|-----|------------|--------|--------|--------|-------|--------|--------|----------|-------|--------|--------|--------|-------|--------|--------|----------|-------|
| 119 | Vermis_9   | -0.178 | -0.375 | 0.019  | 0.101 | -1.766 | -0.013 | 7.73E-02 | 18672 | -0.207 | -0.468 | 0.055  | 0.133 | -1.551 | -0.011 | 1.21E-01 | 18637 |
| 120 | Vermis_10  | -0.036 | -0.091 | 0.019  | 0.028 | -1.292 | -0.009 | 1.96E-01 | 18672 | 0.020  | -0.053 | 0.093  | 0.037 | 0.534  | 0.004  | 5.93E-01 | 18637 |
| 121 | Thal_AV_L  | 0.015  | -0.007 | 0.037  | 0.011 | 1.342  | 0.010  | 1.80E-01 | 18672 | -0.039 | -0.068 | -0.010 | 0.015 | -2.600 | -0.019 | 9.33E-03 | 18637 |
| 122 | Thal_AV_R  | 0.025  | -0.006 | 0.057  | 0.016 | 1.561  | 0.011  | 1.19E-01 | 18672 | -0.058 | -0.100 | -0.017 | 0.021 | -2.736 | -0.020 | 6.23E-03 | 18637 |
| 123 | Thal_LP_L  | 0.035  | 0.011  | 0.060  | 0.012 | 2.824  | 0.021  | 4.74E-03 | 18672 | -0.078 | -0.110 | -0.046 | 0.017 | -4.721 | -0.035 | 2.37E-06 | 18637 |
| 124 | Thal_LP_R  | 0.055  | 0.023  | 0.087  | 0.016 | 3.406  | 0.025  | 6.62E-04 | 18672 | -0.130 | -0.172 | -0.088 | 0.022 | -6.059 | -0.044 | 1.39E-09 | 18637 |
| 125 | Thal_VA_L  | -0.021 | -0.047 | 0.005  | 0.013 | -1.583 | -0.012 | 1.14E-01 | 18672 | 0.017  | -0.018 | 0.051  | 0.018 | 0.952  | 0.007  | 3.41E-01 | 18637 |
| 126 | Thal_VA_R  | -0.022 | -0.054 | 0.010  | 0.016 | -1.349 | -0.010 | 1.77E-01 | 18672 | -0.008 | -0.050 | 0.035  | 0.022 | -0.348 | -0.003 | 7.28E-01 | 18637 |
| 127 | Thal_VL_L  | 0.088  | 0.014  | 0.162  | 0.038 | 2.322  | 0.017  | 2.03E-02 | 18672 | -0.233 | -0.331 | -0.135 | 0.050 | -4.644 | -0.034 | 3.45E-06 | 18637 |
| 128 | Thal_VL_R  | 0.156  | 0.058  | 0.255  | 0.050 | 3.114  | 0.023  | 1.85E-03 | 18672 | -0.405 | -0.536 | -0.275 | 0.067 | -6.091 | -0.045 | 1.14E-09 | 18637 |
| 129 | Thal_VPL_L | 0.198  | 0.110  | 0.286  | 0.045 | 4.406  | 0.032  | 1.06E-05 | 18672 | -0.372 | -0.489 | -0.256 | 0.060 | -6.245 | -0.046 | 4.33E-10 | 18637 |
| 130 | Thal_VPL_R | 0.227  | 0.134  | 0.319  | 0.047 | 4.790  | 0.035  | 1.68E-06 | 18672 | -0.452 | -0.575 | -0.329 | 0.063 | -7.204 | -0.053 | 6.06E-13 | 18637 |
| 131 | Thal_IL_L  | 0.079  | 0.041  | 0.117  | 0.019 | 4.069  | 0.030  | 4.75E-05 | 18672 | -0.165 | -0.215 | -0.114 | 0.026 | -6.380 | -0.047 | 1.81E-10 | 18637 |
| 132 | Thal_IL_R  | 0.104  | 0.061  | 0.147  | 0.022 | 4.716  | 0.034  | 2.43E-06 | 18672 | -0.214 | -0.272 | -0.157 | 0.029 | -7.321 | -0.054 | 2.56E-13 | 18637 |
| 133 | Thal_Re_L  | 0.000  | 0.000  | 0.000  | 0.000 | -2.689 | -0.020 | 7.17E-03 | 18672 | 0.000  | 0.000  | 0.000  | 0.000 | -1.909 | -0.014 | 5.63E-02 | 18637 |
| 134 | Thal_Re_R  | 0.000  | -0.001 | 0.001  | 0.001 | -0.212 | -0.002 | 8.32E-01 | 18672 | -0.004 | -0.005 | -0.002 | 0.001 | -4.313 | -0.032 | 1.62E-05 | 18637 |
| 135 | Thal_MDm_L | 0.643  | 0.360  | 0.925  | 0.144 | 4.457  | 0.033  | 8.37E-06 | 18672 | -1.211 | -1.585 | -0.836 | 0.191 | -6.332 | -0.046 | 2.47E-10 | 18637 |
| 136 | Thal_MDm_R | 0.796  | 0.467  | 1.124  | 0.168 | 4.747  | 0.035  | 2.08E-06 | 18672 | -1.390 | -1.825 | -0.955 | 0.222 | -6.258 | -0.046 | 3.99E-10 | 18637 |
| 137 | Thal_MDI_L | 0.119  | 0.070  | 0.168  | 0.025 | 4.768  | 0.035  | 1.88E-06 | 18672 | -0.241 | -0.306 | -0.177 | 0.033 | -7.292 | -0.053 | 3.18E-13 | 18637 |
| 138 | Thal_MDI_R | 0.149  | 0.093  | 0.205  | 0.028 | 5.255  | 0.038  | 1.49E-07 | 18672 | -0.269 | -0.342 | -0.195 | 0.038 | -7.144 | -0.052 | 9.38E-13 | 18637 |
| 139 | Thal_LGN_L | 0.005  | -0.003 | 0.012  | 0.004 | 1.225  | 0.009  | 2.21E-01 | 18672 | -0.013 | -0.023 | -0.003 | 0.005 | -2.656 | -0.019 | 7.92E-03 | 18637 |
| 140 | Thal_LGN_R | 0.002  | -0.013 | 0.018  | 0.008 | 0.306  | 0.002  | 7.60E-01 | 18672 | -0.061 | -0.082 | -0.040 | 0.011 | -5.699 | -0.042 | 1.23E-08 | 18637 |
| 141 | Thal_MGN_L | 0.017  | 0.003  | 0.030  | 0.007 | 2.449  | 0.018  | 1.43E-02 | 18672 | -0.050 | -0.067 | -0.032 | 0.009 | -5.537 | -0.041 | 3.11E-08 | 18637 |
| 142 | Thal_MGN_R | 0.017  | 0.003  | 0.032  | 0.007 | 2.328  | 0.017  | 1.99E-02 | 18672 | -0.061 | -0.080 | -0.042 | 0.010 | -6.250 | -0.046 | 4.18E-10 | 18637 |
| 143 | Thal_PuA_L | 0.024  | 0.008  | 0.039  | 0.008 | 2.982  | 0.022  | 2.87E-03 | 18672 | -0.059 | -0.080 | -0.038 | 0.011 | -5.582 | -0.041 | 2.42E-08 | 18637 |
| 144 | Thal_PuA_R | 0.053  | 0.020  | 0.085  | 0.017 | 3.171  | 0.023  | 1.52E-03 | 18672 | -0.143 | -0.186 | -0.100 | 0.022 | -6.497 | -0.048 | 8.39E-11 | 18637 |
| 145 | Thal_PuM_L | 0.627  | 0.316  | 0.938  | 0.159 | 3.951  | 0.029  | 7.82E-05 | 18672 | -1.294 | -1.706 | -0.881 | 0.210 | -6.151 | -0.045 | 7.85E-10 | 18637 |
| 146 | Thal_PuM_R | 0.863  | 0.475  | 1.250  | 0.198 | 4.360  | 0.032  | 1.31E-05 | 18672 | -1.687 | -2.201 | -1.174 | 0.262 | -6.438 | -0.047 | 1.24E-10 | 18637 |
| 147 | Thal_PuL_L | 0.136  | 0.080  | 0.193  | 0.029 | 4.714  | 0.034  | 2.45E-06 | 18672 | -0.256 | -0.331 | -0.180 | 0.038 | -6.660 | -0.049 | 2.81E-11 | 18637 |
| 148 | Thal_PuL_R | 0.225  | 0.135  | 0.315  | 0.046 | 4.888  | 0.036  | 1.03E-06 | 18672 | -0.416 | -0.536 | -0.296 | 0.061 | -6.814 | -0.050 | 9.78E-12 | 18637 |
| 149 | Thal_PuL_L | 0.019  | 0.004  | 0.035  | 0.008 | 2.426  | 0.018  | 1.53E-02 | 18672 | -0.032 | -0.053 | -0.012 | 0.010 | -3.108 | -0.023 | 1.89E-03 | 18637 |
| 150 | Thal_PuL_R | 0.025  | 0.005  | 0.046  | 0.010 | 2.443  | 0.018  | 1.46E-02 | 18672 | -0.063 | -0.090 | -0.036 | 0.014 | -4.571 | -0.033 | 4.89E-06 | 18637 |
| 151 | ACC_sub_L  | 0.074  | -0.104 | 0.253  | 0.091 | 0.820  | 0.006  | 4.13E-01 | 18672 | -0.129 | -0.365 | 0.107  | 0.120 | -1.071 | -0.008 | 2.84E-01 | 18637 |
| 152 | ACC_sub_R  | 0.101  | -0.065 | 0.268  | 0.085 | 1.194  | 0.009  | 2.33E-01 | 18672 | -0.092 | -0.312 | 0.129  | 0.113 | -0.813 | -0.006 | 4.16E-01 | 18637 |
| 153 | ACC_pre_L  | 0.103  | -0.354 | 0.559  | 0.233 | 0.441  | 0.003  | 6.59E-01 | 18672 | -0.295 | -0.900 | 0.310  | 0.309 | -0.956 | -0.007 | 3.39E-01 | 18637 |
| 154 | ACC_pre_R  | -0.092 | -0.531 | 0.348  | 0.224 | -0.410 | -0.003 | 6.82E-01 | 18672 | -0.662 | -1.244 | -0.079 | 0.297 | -2.225 | -0.016 | 2.61E-02 | 18637 |
| 155 | ACC_sup_L  | 0.217  | -0.279 | 0.714  | 0.253 | 0.859  | 0.006  | 3.90E-01 | 18672 | -1.160 | -1.818 | -0.502 | 0.336 | -3.457 | -0.025 | 5.48E-04 | 18637 |
| 156 | ACC_sup_R  | -0.153 | -0.666 | 0.361  | 0.262 | -0.582 | -0.004 | 5.60E-01 | 18672 | -0.654 | -1.336 | 0.028  | 0.348 | -1.880 | -0.014 | 6.01E-02 | 18637 |
| 157 | N_Acc_L    | -0.188 | -0.338 | -0.039 | 0.076 | -2.469 | -0.018 | 1.35E-02 | 18672 | -0.313 | -0.511 | -0.115 | 0.101 | -3.099 | -0.023 | 1.95E-03 | 18637 |
| 158 | N_Acc_R    | -0.184 | -0.313 | -0.054 | 0.066 | -2.785 | -0.020 | 5.36E-03 | 18672 | -0.248 | -0.420 | -0.077 | 0.087 | -2.840 | -0.021 | 4.51E-03 | 18637 |
| 159 | VTA_L      | 0.007  | 0.002  | 0.012  | 0.003 | 2.686  | 0.020  | 7.23E-03 | 18672 | -0.011 | -0.018 | -0.004 | 0.004 | -3.082 | -0.023 | 2.06E-03 | 18637 |
| 160 | VTA_R      | 0.008  | 0.003  | 0.012  | 0.002 | 3.202  | 0.023  | 1.37E-03 | 18672 | -0.010 | -0.016 | -0.004 | 0.003 | -3.104 | -0.023 | 1.91E-03 | 18637 |
| 161 | SN_pc_L    | 0.014  | 0.005  | 0.022  | 0.004 | 3.150  | 0.023  | 1.64E-03 | 18672 | -0.014 | -0.026 | -0.003 | 0.006 | -2.521 | -0.018 | 1.17E-02 | 18637 |
| 162 | SN_pc_R    | 0.021  | 0.009  | 0.032  | 0.006 | 3.641  | 0.027  | 2.72E-04 | 18672 | -0.021 | -0.036 | -0.007 | 0.007 | -2.844 | -0.021 | 4.46E-03 | 18637 |
| 163 | SN_pr_L    | 0.010  | -0.002 | 0.021  | 0.006 | 1.658  | 0.012  | 9.73E-02 | 18672 | -0.018 | -0.033 | -0.003 | 0.008 | -2.346 | -0.017 | 1.90E-02 | 18637 |
| 164 | SN_pr_R    | 0.021  | 0.008  | 0.034  | 0.007 | 3.169  | 0.023  | 1.53E-03 | 18672 | -0.016 | -0.033 | 0.001  | 0.009 | -1.836 | -0.013 | 6.64E-02 | 18637 |
| 165 | Red_N_L    | 0.002  | -0.012 | 0.016  | 0.007 | 0.248  | 0.002  | 8.04E-01 | 18672 | -0.029 | -0.048 | -0.010 | 0.010 | -3.011 | -0.022 | 2.61E-03 | 18637 |
| 166 | Red_N_R    | 0.006  | -0.010 | 0.021  | 0.008 | 0.748  | 0.005  | 4.54E-01 | 18672 | -0.028 | -0.048 | -0.007 | 0.010 | -2.653 | -0.019 | 7.99E-03 | 18637 |

|     |         |        |        |        |       |        |        |          |       |        |        |        |       |        |        |          |       |
|-----|---------|--------|--------|--------|-------|--------|--------|----------|-------|--------|--------|--------|-------|--------|--------|----------|-------|
| 167 | LC_L    | -0.008 | -0.014 | -0.003 | 0.003 | -3.079 | -0.023 | 2.08E-03 | 18672 | 0.000  | -0.007 | 0.007  | 0.004 | -0.069 | -0.001 | 9.45E-01 | 18637 |
| 168 | LC_R    | -0.009 | -0.015 | -0.003 | 0.003 | -3.009 | -0.022 | 2.63E-03 | 18672 | -0.001 | -0.009 | 0.007  | 0.004 | -0.281 | -0.002 | 7.79E-01 | 18637 |
| 169 | Raphe_D | -0.004 | -0.025 | 0.016  | 0.010 | -0.385 | -0.003 | 7.00E-01 | 18672 | -0.064 | -0.091 | -0.036 | 0.014 | -4.585 | -0.034 | 4.58E-06 | 18637 |
| 170 | Raphe_M | -0.002 | -0.009 | 0.004  | 0.003 | -0.720 | -0.005 | 4.71E-01 | 18672 | -0.006 | -0.014 | 0.002  | 0.004 | -1.371 | -0.010 | 1.70E-01 | 18637 |

| Cooked vegetable intake |                      |         |          |         |        |        |        |          |       | Processed meat intake |          |          |        |        |        |          |       |
|-------------------------|----------------------|---------|----------|---------|--------|--------|--------|----------|-------|-----------------------|----------|----------|--------|--------|--------|----------|-------|
| Number                  | AAL 3 region         | beta    | 95%CI l  | 95%CI h | se     | t      | r      | p        | df.e  | beta                  | 95%CI l  | 95%CI h  | se     | t      | r      | p        | df.e  |
| 0                       | Total brain          | -89.216 | -178.191 | -0.241  | 45.393 | -1.965 | -0.014 | 4.94E-02 | 18581 | -514.783              | -645.621 | -383.945 | 66.751 | -7.712 | -0.056 | 1.30E-14 | 18733 |
| 1                       | Precentral_L         | -1.155  | -4.285   | 1.976   | 1.597  | -0.723 | -0.005 | 4.70E-01 | 18581 | -10.080               | -14.690  | -5.469   | 2.352  | -4.285 | -0.031 | 1.83E-05 | 18733 |
| 2                       | Precentral_R         | -0.787  | -3.654   | 2.080   | 1.463  | -0.538 | -0.004 | 5.90E-01 | 18581 | -7.535                | -11.761  | -3.309   | 2.156  | -3.495 | -0.026 | 4.75E-04 | 18733 |
| 3                       | Frontal_Sup_2_L      | -0.811  | -4.116   | 2.494   | 1.686  | -0.481 | -0.004 | 6.30E-01 | 18581 | -10.827               | -15.693  | -5.962   | 2.482  | -4.362 | -0.032 | 1.30E-05 | 18733 |
| 4                       | Frontal_Sup_2_R      | -1.322  | -4.966   | 2.322   | 1.859  | -0.711 | -0.005 | 4.77E-01 | 18581 | -14.394               | -19.755  | -9.033   | 2.735  | -5.263 | -0.038 | 1.43E-07 | 18733 |
| 5                       | Frontal_Mid_2_L      | -1.964  | -5.435   | 1.508   | 1.771  | -1.109 | -0.008 | 2.68E-01 | 18581 | -9.067                | -14.179  | -3.956   | 2.608  | -3.477 | -0.025 | 5.08E-04 | 18733 |
| 6                       | Frontal_Mid_2_R      | -3.910  | -7.836   | 0.017   | 2.003  | -1.951 | -0.014 | 5.10E-02 | 18581 | -15.032               | -20.814  | -9.251   | 2.950  | -5.096 | -0.037 | 3.50E-07 | 18733 |
| 7                       | Frontal_Inf_Oper_L   | -0.382  | -1.407   | 0.644   | 0.523  | -0.730 | -0.005 | 4.65E-01 | 18581 | -4.191                | -5.701   | -2.681   | 0.770  | -5.440 | -0.040 | 5.39E-08 | 18733 |
| 8                       | Frontal_Inf_Oper_R   | -0.804  | -2.091   | 0.482   | 0.656  | -1.225 | -0.009 | 2.20E-01 | 18581 | -5.521                | -7.414   | -3.628   | 0.966  | -5.717 | -0.042 | 1.10E-08 | 18733 |
| 9                       | Frontal_Inf_Tri_L    | -1.278  | -3.456   | 0.901   | 1.111  | -1.150 | -0.008 | 2.50E-01 | 18581 | -9.302                | -12.508  | -6.095   | 1.636  | -5.686 | -0.042 | 1.32E-08 | 18733 |
| 10                      | Frontal_Inf_Tri_R    | 0.458   | -1.253   | 2.170   | 0.873  | 0.525  | 0.004  | 6.00E-01 | 18581 | -7.121                | -9.639   | -4.604   | 1.284  | -5.544 | -0.040 | 2.99E-08 | 18733 |
| 11                      | Frontal_Inf_Orb_2_L  | -0.318  | -0.970   | 0.333   | 0.332  | -0.957 | -0.007 | 3.39E-01 | 18581 | -2.428                | -3.387   | -1.469   | 0.489  | -4.964 | -0.036 | 6.97E-07 | 18733 |
| 12                      | Frontal_Inf_Orb_2_R  | 0.057   | -0.624   | 0.738   | 0.348  | 0.163  | 0.001  | 8.70E-01 | 18581 | -2.339                | -3.342   | -1.337   | 0.512  | -4.573 | -0.033 | 4.85E-06 | 18733 |
| 13                      | Rolandic_Oper_L      | -1.183  | -2.168   | -0.198  | 0.503  | -2.354 | -0.017 | 1.86E-02 | 18581 | -3.394                | -4.844   | -1.944   | 0.740  | -4.588 | -0.034 | 4.50E-06 | 18733 |
| 14                      | Rolandic_Oper_R      | -0.285  | -1.695   | 1.125   | 0.719  | -0.396 | -0.003 | 6.92E-01 | 18581 | -5.692                | -7.767   | -3.617   | 1.059  | -5.377 | -0.039 | 7.65E-08 | 18733 |
| 15                      | Supp_Motor_Area_L    | -0.498  | -2.838   | 1.841   | 1.194  | -0.417 | -0.003 | 6.76E-01 | 18581 | -7.131                | -10.579  | -3.683   | 1.759  | -4.054 | -0.030 | 5.06E-05 | 18733 |
| 16                      | Supp_Motor_Area_R    | 0.281   | -2.306   | 2.868   | 1.320  | 0.213  | 0.002  | 8.31E-01 | 18581 | -6.983                | -10.793  | -3.173   | 1.944  | -3.593 | -0.026 | 3.28E-04 | 18733 |
| 17                      | Olfactory_L          | -0.335  | -0.683   | 0.013   | 0.178  | -1.886 | -0.014 | 5.93E-02 | 18581 | -0.886                | -1.398   | -0.374   | 0.261  | -3.392 | -0.025 | 6.94E-04 | 18733 |
| 18                      | Olfactory_R          | -0.348  | -0.697   | 0.001   | 0.178  | -1.952 | -0.014 | 5.10E-02 | 18581 | -0.837                | -1.351   | -0.324   | 0.262  | -3.194 | -0.023 | 1.40E-03 | 18733 |
| 19                      | Frontal_Sup_Medial_L | 0.131   | -2.063   | 2.325   | 1.119  | 0.117  | 0.001  | 9.07E-01 | 18581 | -10.324               | -13.552  | -7.096   | 1.647  | -6.269 | -0.046 | 3.71E-10 | 18733 |
| 20                      | Frontal_Sup_Medial_R | -1.187  | -2.785   | 0.410   | 0.815  | -1.457 | -0.011 | 1.45E-01 | 18581 | -7.511                | -9.861   | -5.161   | 1.199  | -6.265 | -0.046 | 3.80E-10 | 18733 |
| 21                      | Frontal_Med_Orb_L    | -1.058  | -1.878   | -0.238  | 0.418  | -2.529 | -0.019 | 1.14E-02 | 18581 | -3.034                | -4.240   | -1.827   | 0.616  | -4.928 | -0.036 | 8.37E-07 | 18733 |
| 22                      | Frontal_Med_Orb_R    | -1.276  | -2.283   | -0.268  | 0.514  | -2.481 | -0.018 | 1.31E-02 | 18581 | -4.247                | -5.730   | -2.764   | 0.757  | -5.614 | -0.041 | 2.01E-08 | 18733 |
| 23                      | Rectus_L             | -1.068  | -1.917   | -0.219  | 0.433  | -2.466 | -0.018 | 1.37E-02 | 18581 | -3.028                | -4.276   | -1.779   | 0.637  | -4.754 | -0.035 | 2.01E-06 | 18733 |
| 24                      | Rectus_R             | -1.017  | -1.801   | -0.232  | 0.400  | -2.539 | -0.019 | 1.11E-02 | 18581 | -2.550                | -3.705   | -1.394   | 0.589  | -4.326 | -0.032 | 1.53E-05 | 18733 |
| 25                      | OFCmed_L             | -0.271  | -0.764   | 0.221   | 0.251  | -1.081 | -0.008 | 2.80E-01 | 18581 | -1.810                | -2.533   | -1.086   | 0.369  | -4.903 | -0.036 | 9.50E-07 | 18733 |
| 26                      | OFCmed_R             | -0.459  | -1.033   | 0.114   | 0.292  | -1.571 | -0.012 | 1.16E-01 | 18581 | -2.092                | -2.936   | -1.248   | 0.430  | -4.861 | -0.035 | 1.18E-06 | 18733 |
| 27                      | OFCant_L             | -0.439  | -1.008   | 0.130   | 0.290  | -1.513 | -0.011 | 1.30E-01 | 18581 | -1.548                | -2.385   | -0.710   | 0.427  | -3.622 | -0.026 | 2.93E-04 | 18733 |
| 28                      | OFCant_R             | -0.603  | -1.355   | 0.148   | 0.383  | -1.573 | -0.012 | 1.16E-01 | 18581 | -2.526                | -3.632   | -1.420   | 0.564  | -4.477 | -0.033 | 7.63E-06 | 18733 |
| 29                      | OFCpost_L            | -0.415  | -1.127   | 0.298   | 0.363  | -1.140 | -0.008 | 2.54E-01 | 18581 | -1.693                | -2.742   | -0.644   | 0.535  | -3.164 | -0.023 | 1.56E-03 | 18733 |
| 30                      | OFCpost_R            | -0.422  | -1.080   | 0.237   | 0.336  | -1.255 | -0.009 | 2.09E-01 | 18581 | -2.153                | -3.122   | -1.184   | 0.494  | -4.354 | -0.032 | 1.34E-05 | 18733 |
| 31                      | OFClat_L             | -0.018  | -0.258   | 0.223   | 0.123  | -0.144 | -0.001 | 8.86E-01 | 18581 | -0.834                | -1.187   | -0.480   | 0.180  | -4.620 | -0.034 | 3.86E-06 | 18733 |
| 32                      | OFClat_R             | -0.021  | -0.224   | 0.183   | 0.104  | -0.198 | -0.001 | 8.43E-01 | 18581 | -0.720                | -1.019   | -0.422   | 0.152  | -4.726 | -0.035 | 2.31E-06 | 18733 |
| 33                      | Insula_L             | -2.050  | -4.253   | 0.153   | 1.124  | -1.824 | -0.013 | 6.82E-02 | 18581 | -7.278                | -10.519  | -4.036   | 1.654  | -4.401 | -0.032 | 1.09E-05 | 18733 |
| 34                      | Insula_R             | -2.094  | -4.239   | 0.052   | 1.095  | -1.912 | -0.014 | 5.58E-02 | 18581 | -7.487                | -10.645  | -4.329   | 1.611  | -4.647 | -0.034 | 3.40E-06 | 18733 |
| 37                      | Cingulate_Mid_L      | -1.646  | -3.508   | 0.215   | 0.950  | -1.733 | -0.013 | 8.31E-02 | 18581 | -10.941               | -13.678  | -8.203   | 1.397  | -7.834 | -0.057 | 4.99E-15 | 18733 |
| 38                      | Cingulate_Mid_R      | -1.174  | -3.159   | 0.811   | 1.013  | -1.159 | -0.009 | 2.46E-01 | 18581 | -12.263               | -15.182  | -9.345   | 1.489  | -8.236 | -0.060 | 1.90E-16 | 18733 |
| 39                      | Cingulate_Post_L     | -0.493  | -1.062   | 0.076   | 0.290  | -1.697 | -0.012 | 8.96E-02 | 18581 | -1.175                | -2.013   | -0.338   | 0.427  | -2.750 | -0.020 | 5.96E-03 | 18733 |
| 40                      | Cingulate_Post_R     | -0.275  | -0.591   | 0.041   | 0.161  | -1.709 | -0.013 | 8.76E-02 | 18581 | -0.547                | -1.012   | -0.082   | 0.237  | -2.307 | -0.017 | 2.11E-02 | 18733 |
| 41                      | Hippocampus_L        | 0.335   | -0.585   | 1.254   | 0.469  | 0.713  | 0.005  | 4.76E-01 | 18581 | -2.125                | -3.479   | -0.770   | 0.691  | -3.074 | -0.022 | 2.12E-03 | 18733 |
| 42                      | Hippocampus_R        | 0.268   | -0.686   | 1.222   | 0.487  | 0.551  | 0.004  | 5.82E-01 | 18581 | -2.581                | -3.986   | -1.176   | 0.717  | -3.602 | -0.026 | 3.17E-04 | 18733 |
| 43                      | ParaHippocampal_L    | 0.730   | -0.087   | 1.547   | 0.417  | 1.752  | 0.013  | 7.98E-02 | 18581 | -2.381                | -3.585   | -1.178   | 0.614  | -3.878 | -0.028 | 1.06E-04 | 18733 |

|    |                      |        |        |        |       |        |        |          |       |         |         |         |       |        |        |          |       |
|----|----------------------|--------|--------|--------|-------|--------|--------|----------|-------|---------|---------|---------|-------|--------|--------|----------|-------|
| 44 | ParaHippocampal_R    | 0.379  | -0.652 | 1.410  | 0.526 | 0.720  | 0.005  | 4.71E-01 | 18581 | -2.852  | -4.371  | -1.333  | 0.775 | -3.681 | -0.027 | 2.33E-04 | 18733 |
| 45 | Amygdala_L           | -0.069 | -0.386 | 0.249  | 0.162 | -0.424 | -0.003 | 6.71E-01 | 18581 | -0.429  | -0.897  | 0.038   | 0.239 | -1.799 | -0.013 | 7.20E-02 | 18733 |
| 46 | Amygdala_R           | -0.192 | -0.517 | 0.132  | 0.166 | -1.161 | -0.009 | 2.46E-01 | 18581 | -0.791  | -1.270  | -0.313  | 0.244 | -3.241 | -0.024 | 1.19E-03 | 18733 |
| 47 | Calcarine_L          | -1.598 | -4.629 | 1.433  | 1.546 | -1.034 | -0.008 | 3.01E-01 | 18581 | -3.918  | -8.382  | 0.546   | 2.277 | -1.721 | -0.013 | 8.54E-02 | 18733 |
| 48 | Calcarine_R          | -2.449 | -4.983 | 0.086  | 1.293 | -1.894 | -0.014 | 5.83E-02 | 18581 | -3.227  | -6.957  | 0.503   | 1.903 | -1.696 | -0.012 | 8.99E-02 | 18733 |
| 49 | Cuneus_L             | -0.806 | -2.706 | 1.095  | 0.970 | -0.831 | -0.006 | 4.06E-01 | 18581 | -3.259  | -6.059  | -0.459  | 1.428 | -2.282 | -0.017 | 2.25E-02 | 18733 |
| 50 | Cuneus_R             | -1.373 | -2.828 | 0.081  | 0.742 | -1.850 | -0.014 | 6.43E-02 | 18581 | -3.970  | -6.113  | -1.828  | 1.093 | -3.633 | -0.027 | 2.81E-04 | 18733 |
| 51 | Lingual_L            | -0.898 | -2.721 | 0.926  | 0.930 | -0.965 | -0.007 | 3.35E-01 | 18581 | -6.014  | -8.697  | -3.331  | 1.369 | -4.393 | -0.032 | 1.12E-05 | 18733 |
| 52 | Lingual_R            | -1.830 | -3.743 | 0.082  | 0.976 | -1.876 | -0.014 | 6.07E-02 | 18581 | -4.820  | -7.633  | -2.008  | 1.435 | -3.359 | -0.025 | 7.83E-04 | 18733 |
| 53 | Occipital_Sup_L      | -0.537 | -1.791 | 0.716  | 0.640 | -0.840 | -0.006 | 4.01E-01 | 18581 | -4.084  | -5.928  | -2.240  | 0.941 | -4.341 | -0.032 | 1.43E-05 | 18733 |
| 54 | Occipital_Sup_R      | -0.288 | -1.648 | 1.071  | 0.694 | -0.415 | -0.003 | 6.78E-01 | 18581 | -3.127  | -5.127  | -1.127  | 1.020 | -3.065 | -0.022 | 2.18E-03 | 18733 |
| 55 | Occipital_Mid_L      | -2.908 | -5.846 | 0.030  | 1.499 | -1.940 | -0.014 | 5.24E-02 | 18581 | -7.213  | -11.538 | -2.888  | 2.207 | -3.269 | -0.024 | 1.08E-03 | 18733 |
| 56 | Occipital_Mid_R      | -0.673 | -2.717 | 1.371  | 1.043 | -0.645 | -0.005 | 5.19E-01 | 18581 | -1.296  | -4.306  | 1.714   | 1.536 | -0.844 | -0.006 | 3.99E-01 | 18733 |
| 57 | Occipital_Inf_L      | -0.814 | -1.789 | 0.161  | 0.498 | -1.636 | -0.012 | 1.02E-01 | 18581 | -0.716  | -2.153  | 0.720   | 0.733 | -0.978 | -0.007 | 3.28E-01 | 18733 |
| 58 | Occipital_Inf_R      | -0.639 | -1.766 | 0.487  | 0.575 | -1.112 | -0.008 | 2.66E-01 | 18581 | 1.403   | -0.256  | 3.062   | 0.846 | 1.658  | 0.012  | 9.73E-02 | 18733 |
| 59 | Fusiform_L           | 0.644  | -1.490 | 2.778  | 1.089 | 0.591  | 0.004  | 5.54E-01 | 18581 | -4.402  | -7.545  | -1.260  | 1.603 | -2.746 | -0.020 | 6.04E-03 | 18733 |
| 60 | Fusiform_R           | 0.278  | -2.068 | 2.623  | 1.197 | 0.232  | 0.002  | 8.16E-01 | 18581 | -5.486  | -8.941  | -2.031  | 1.763 | -3.112 | -0.023 | 1.86E-03 | 18733 |
| 61 | Postcentral_L        | 0.147  | -3.066 | 3.359  | 1.639 | 0.089  | 0.001  | 9.29E-01 | 18581 | -17.027 | -21.748 | -12.305 | 2.409 | -7.068 | -0.052 | 1.62E-12 | 18733 |
| 62 | Postcentral_R        | -1.468 | -4.761 | 1.825  | 1.680 | -0.874 | -0.006 | 3.82E-01 | 18581 | -11.707 | -16.549 | -6.865  | 2.470 | -4.739 | -0.035 | 2.16E-06 | 18733 |
| 63 | Parietal_Sup_L       | -1.213 | -3.063 | 0.638  | 0.944 | -1.285 | -0.009 | 1.99E-01 | 18581 | -4.934  | -7.656  | -2.211  | 1.389 | -3.552 | -0.026 | 3.83E-04 | 18733 |
| 64 | Parietal_Sup_R       | -1.044 | -2.686 | 0.598  | 0.838 | -1.246 | -0.009 | 2.13E-01 | 18581 | -3.238  | -5.653  | -0.822  | 1.232 | -2.627 | -0.019 | 8.62E-03 | 18733 |
| 65 | Parietal_Inf_L       | -1.714 | -4.136 | 0.709  | 1.236 | -1.386 | -0.010 | 1.66E-01 | 18581 | -12.303 | -15.865 | -8.741  | 1.817 | -6.769 | -0.049 | 1.33E-11 | 18733 |
| 66 | Parietal_Inf_R       | -0.298 | -1.867 | 1.270  | 0.800 | -0.373 | -0.003 | 7.09E-01 | 18581 | -5.038  | -7.348  | -2.729  | 1.178 | -4.277 | -0.031 | 1.90E-05 | 18733 |
| 67 | SupraMarginal_L      | -0.298 | -1.718 | 1.122  | 0.724 | -0.411 | -0.003 | 6.81E-01 | 18581 | -6.054  | -8.143  | -3.966  | 1.065 | -5.682 | -0.041 | 1.35E-08 | 18733 |
| 68 | SupraMarginal_R      | -1.725 | -3.734 | 0.283  | 1.025 | -1.684 | -0.012 | 9.22E-02 | 18581 | -7.995  | -10.949 | -5.040  | 1.507 | -5.303 | -0.039 | 1.15E-07 | 18733 |
| 69 | Angular_L            | -0.863 | -2.257 | 0.531  | 0.711 | -1.213 | -0.009 | 2.25E-01 | 18581 | -3.807  | -5.860  | -1.754  | 1.047 | -3.635 | -0.027 | 2.78E-04 | 18733 |
| 70 | Angular_R            | -0.645 | -2.517 | 1.227  | 0.955 | -0.675 | -0.005 | 5.00E-01 | 18581 | -2.629  | -5.382  | 0.124   | 1.405 | -1.872 | -0.014 | 6.13E-02 | 18733 |
| 71 | Precuneus_L          | -2.467 | -5.868 | 0.933  | 1.735 | -1.422 | -0.010 | 1.55E-01 | 18581 | -11.872 | -16.873 | -6.871  | 2.551 | -4.653 | -0.034 | 3.29E-06 | 18733 |
| 72 | Precuneus_R          | -2.956 | -5.985 | 0.074  | 1.546 | -1.912 | -0.014 | 5.59E-02 | 18581 | -9.032  | -13.488 | -4.577  | 2.273 | -3.973 | -0.029 | 7.11E-05 | 18733 |
| 73 | Paracentral_Lobule_L | 0.439  | -1.117 | 1.995  | 0.794 | 0.553  | 0.004  | 5.80E-01 | 18581 | -4.030  | -6.321  | -1.740  | 1.169 | -3.449 | -0.025 | 5.65E-04 | 18733 |
| 74 | Paracentral_Lobule_R | 0.338  | -0.775 | 1.452  | 0.568 | 0.596  | 0.004  | 5.51E-01 | 18581 | -2.441  | -4.081  | -0.800  | 0.837 | -2.916 | -0.021 | 3.55E-03 | 18733 |
| 75 | Caudate_L            | 0.297  | -0.946 | 1.541  | 0.634 | 0.469  | 0.003  | 6.39E-01 | 18581 | -3.160  | -4.990  | -1.331  | 0.934 | -3.385 | -0.025 | 7.13E-04 | 18733 |
| 76 | Caudate_R            | -0.201 | -1.608 | 1.206  | 0.718 | -0.281 | -0.002 | 7.79E-01 | 18581 | -2.846  | -4.917  | -0.774  | 1.057 | -2.692 | -0.020 | 7.11E-03 | 18733 |
| 77 | Putamen_L            | -0.931 | -2.817 | 0.956  | 0.963 | -0.967 | -0.007 | 3.34E-01 | 18581 | -4.377  | -7.156  | -1.599  | 1.418 | -3.088 | -0.023 | 2.02E-03 | 18733 |
| 78 | Putamen_R            | -1.388 | -3.309 | 0.533  | 0.980 | -1.416 | -0.010 | 1.57E-01 | 18581 | -4.651  | -7.481  | -1.822  | 1.444 | -3.222 | -0.024 | 1.28E-03 | 18733 |
| 79 | Pallidum_L           | 0.007  | -0.161 | 0.174  | 0.086 | 0.076  | 0.001  | 9.39E-01 | 18581 | -0.352  | -0.599  | -0.105  | 0.126 | -2.791 | -0.020 | 5.25E-03 | 18733 |
| 80 | Pallidum_R           | 0.052  | -0.132 | 0.236  | 0.094 | 0.555  | 0.004  | 5.79E-01 | 18581 | -0.486  | -0.757  | -0.214  | 0.138 | -3.510 | -0.026 | 4.50E-04 | 18733 |
| 83 | Heschl_L             | -0.343 | -0.683 | -0.002 | 0.174 | -1.973 | -0.014 | 4.85E-02 | 18581 | -1.263  | -1.763  | -0.762  | 0.255 | -4.943 | -0.036 | 7.75E-07 | 18733 |
| 84 | Heschl_R             | -0.215 | -0.596 | 0.165  | 0.194 | -1.108 | -0.008 | 2.68E-01 | 18581 | -1.351  | -1.910  | -0.792  | 0.285 | -4.734 | -0.035 | 2.22E-06 | 18733 |
| 85 | Temporal_Sup_L       | -2.907 | -5.365 | -0.450 | 1.254 | -2.319 | -0.017 | 2.04E-02 | 18581 | -9.823  | -13.437 | -6.208  | 1.844 | -5.327 | -0.039 | 1.01E-07 | 18733 |
| 86 | Temporal_Sup_R       | -0.812 | -3.531 | 1.907  | 1.387 | -0.585 | -0.004 | 5.58E-01 | 18581 | -13.484 | -17.481 | -9.486  | 2.039 | -6.612 | -0.048 | 3.91E-11 | 18733 |
| 87 | Temporal_Pole_Sup_L  | -0.977 | -2.141 | 0.186  | 0.594 | -1.646 | -0.012 | 9.98E-02 | 18581 | -1.726  | -3.440  | -0.013  | 0.874 | -1.975 | -0.014 | 4.83E-02 | 18733 |
| 88 | Temporal_Pole_Sup_R  | -0.009 | -1.234 | 1.216  | 0.625 | -0.015 | 0.000  | 9.88E-01 | 18581 | -2.556  | -4.360  | -0.752  | 0.920 | -2.777 | -0.020 | 5.50E-03 | 18733 |
| 89 | Temporal_Mid_L       | -2.296 | -6.391 | 1.799  | 2.089 | -1.099 | -0.008 | 2.72E-01 | 18581 | -15.292 | -21.318 | -9.266  | 3.074 | -4.974 | -0.036 | 6.62E-07 | 18733 |
| 90 | Temporal_Mid_R       | -2.959 | -6.594 | 0.675  | 1.854 | -1.596 | -0.012 | 1.11E-01 | 18581 | -9.181  | -14.533 | -3.829  | 2.730 | -3.362 | -0.025 | 7.75E-04 | 18733 |
| 91 | Temporal_Pole_Mid_L  | -0.024 | -1.002 | 0.954  | 0.499 | -0.049 | 0.000  | 9.61E-01 | 18581 | -0.530  | -1.971  | 0.910   | 0.735 | -0.721 | -0.005 | 4.71E-01 | 18733 |
| 92 | Temporal_Pole_Mid_R  | -0.984 | -2.172 | 0.204  | 0.606 | -1.624 | -0.012 | 1.04E-01 | 18581 | -1.286  | -3.037  | 0.464   | 0.893 | -1.440 | -0.011 | 1.50E-01 | 18733 |
| 93 | Temporal_Inf_L       | -1.387 | -4.203 | 1.428  | 1.436 | -0.966 | -0.007 | 3.34E-01 | 18581 | -4.308  | -8.453  | -0.163  | 2.115 | -2.037 | -0.015 | 4.16E-02 | 18733 |

|     |                    |        |        |        |       |        |        |          |       |        |         |        |       |        |        |          |       |
|-----|--------------------|--------|--------|--------|-------|--------|--------|----------|-------|--------|---------|--------|-------|--------|--------|----------|-------|
| 94  | Temporal_Inf_R     | -5.233 | -8.300 | -2.166 | 1.565 | -3.345 | -0.025 | 8.25E-04 | 18581 | -0.980 | -5.501  | 3.541  | 2.307 | -0.425 | -0.003 | 6.71E-01 | 18733 |
| 95  | Cerebellum_Crus1_L | -1.235 | -4.579 | 2.108  | 1.706 | -0.724 | -0.005 | 4.69E-01 | 18581 | -2.908 | -7.828  | 2.012  | 2.510 | -1.158 | -0.008 | 2.47E-01 | 18733 |
| 96  | Cerebellum_Crus1_R | 0.189  | -3.220 | 3.598  | 1.739 | 0.109  | 0.001  | 9.14E-01 | 18581 | -2.995 | -8.013  | 2.023  | 2.560 | -1.170 | -0.009 | 2.42E-01 | 18733 |
| 97  | Cerebellum_Crus2_L | -1.482 | -4.132 | 1.168  | 1.352 | -1.096 | -0.008 | 2.73E-01 | 18581 | -7.786 | -11.689 | -3.883 | 1.991 | -3.910 | -0.029 | 9.26E-05 | 18733 |
| 98  | Cerebellum_Crus2_R | -0.522 | -2.974 | 1.929  | 1.251 | -0.418 | -0.003 | 6.76E-01 | 18581 | -5.138 | -8.749  | -1.527 | 1.842 | -2.789 | -0.020 | 5.29E-03 | 18733 |
| 99  | Cerebellum_3_L     | 0.065  | -0.113 | 0.243  | 0.091 | 0.714  | 0.005  | 4.75E-01 | 18581 | -0.056 | -0.318  | 0.206  | 0.134 | -0.417 | -0.003 | 6.77E-01 | 18733 |
| 100 | Cerebellum_3_R     | 0.171  | -0.069 | 0.411  | 0.122 | 1.396  | 0.010  | 1.63E-01 | 18581 | -0.209 | -0.563  | 0.144  | 0.180 | -1.159 | -0.008 | 2.46E-01 | 18733 |
| 101 | Cerebellum_4_5_L   | 0.392  | -1.047 | 1.831  | 0.734 | 0.534  | 0.004  | 5.93E-01 | 18581 | -1.618 | -3.737  | 0.501  | 1.081 | -1.497 | -0.011 | 1.35E-01 | 18733 |
| 102 | Cerebellum_4_5_R   | 0.844  | -0.329 | 2.016  | 0.598 | 1.410  | 0.010  | 1.58E-01 | 18581 | -1.825 | -3.551  | -0.099 | 0.881 | -2.072 | -0.015 | 3.83E-02 | 18733 |
| 103 | Cerebellum_6_L     | 0.046  | -2.442 | 2.534  | 1.269 | 0.036  | 0.000  | 9.71E-01 | 18581 | -3.619 | -7.281  | 0.042  | 1.868 | -1.937 | -0.014 | 5.27E-02 | 18733 |
| 104 | Cerebellum_6_R     | 0.491  | -2.129 | 3.112  | 1.337 | 0.368  | 0.003  | 7.13E-01 | 18581 | -3.161 | -7.020  | 0.697  | 1.968 | -1.606 | -0.012 | 1.08E-01 | 18733 |
| 105 | Cerebellum_7b_L    | -0.539 | -1.349 | 0.271  | 0.413 | -1.304 | -0.010 | 1.92E-01 | 18581 | -2.144 | -3.337  | -0.951 | 0.609 | -3.522 | -0.026 | 4.29E-04 | 18733 |
| 106 | Cerebellum_7b_R    | -0.301 | -1.103 | 0.502  | 0.410 | -0.734 | -0.005 | 4.63E-01 | 18581 | -2.298 | -3.481  | -1.116 | 0.603 | -3.809 | -0.028 | 1.40E-04 | 18733 |
| 107 | Cerebellum_8_L     | -1.526 | -4.097 | 1.045  | 1.312 | -1.163 | -0.009 | 2.45E-01 | 18581 | -1.553 | -5.341  | 2.236  | 1.933 | -0.803 | -0.006 | 4.22E-01 | 18733 |
| 108 | Cerebellum_8_R     | -1.410 | -4.759 | 1.939  | 1.709 | -0.826 | -0.006 | 4.09E-01 | 18581 | -8.395 | -13.326 | -3.465 | 2.515 | -3.338 | -0.024 | 8.46E-04 | 18733 |
| 109 | Cerebellum_9_L     | -0.563 | -2.015 | 0.890  | 0.741 | -0.759 | -0.006 | 4.48E-01 | 18581 | 1.890  | -0.252  | 4.032  | 1.093 | 1.730  | 0.013  | 8.37E-02 | 18733 |
| 110 | Cerebellum_9_R     | -0.619 | -2.048 | 0.810  | 0.729 | -0.849 | -0.006 | 3.96E-01 | 18581 | 2.267  | 0.161   | 4.373  | 1.074 | 2.110  | 0.015  | 3.48E-02 | 18733 |
| 111 | Cerebellum_10_L    | -0.047 | -0.151 | 0.056  | 0.053 | -0.900 | -0.007 | 3.68E-01 | 18581 | 0.294  | 0.142   | 0.446  | 0.078 | 3.786  | 0.028  | 1.53E-04 | 18733 |
| 112 | Cerebellum_10_R    | -0.027 | -0.134 | 0.080  | 0.055 | -0.492 | -0.004 | 6.23E-01 | 18581 | 0.099  | -0.059  | 0.257  | 0.081 | 1.227  | 0.009  | 2.20E-01 | 18733 |
| 113 | Vermis_1_2         | 0.052  | -0.016 | 0.119  | 0.034 | 1.507  | 0.011  | 1.32E-01 | 18581 | -0.026 | -0.125  | 0.072  | 0.050 | -0.524 | -0.004 | 6.01E-01 | 18733 |
| 114 | Vermis_3           | 0.105  | -0.162 | 0.371  | 0.136 | 0.771  | 0.006  | 4.41E-01 | 18581 | -0.413 | -0.805  | -0.020 | 0.200 | -2.061 | -0.015 | 3.93E-02 | 18733 |
| 115 | Vermis_4_5         | 0.090  | -0.694 | 0.874  | 0.400 | 0.224  | 0.002  | 8.23E-01 | 18581 | -0.016 | -1.170  | 1.138  | 0.589 | -0.026 | 0.000  | 9.79E-01 | 18733 |
| 116 | Vermis_6           | -0.076 | -0.512 | 0.361  | 0.223 | -0.340 | -0.002 | 7.34E-01 | 18581 | 0.539  | -0.103  | 1.182  | 0.328 | 1.645  | 0.012  | 1.00E-01 | 18733 |
| 117 | Vermis_7           | -0.095 | -0.342 | 0.152  | 0.126 | -0.752 | -0.006 | 4.52E-01 | 18581 | 0.302  | -0.061  | 0.665  | 0.185 | 1.629  | 0.012  | 1.03E-01 | 18733 |
| 118 | Vermis_8           | -0.081 | -0.487 | 0.324  | 0.207 | -0.394 | -0.003 | 6.94E-01 | 18581 | 0.256  | -0.342  | 0.853  | 0.305 | 0.839  | 0.006  | 4.01E-01 | 18733 |
| 119 | Vermis_9           | -0.030 | -0.358 | 0.298  | 0.167 | -0.180 | -0.001 | 8.57E-01 | 18581 | 0.334  | -0.150  | 0.818  | 0.247 | 1.352  | 0.010  | 1.76E-01 | 18733 |
| 120 | Vermis_10          | 0.107  | 0.016  | 0.199  | 0.047 | 2.299  | 0.017  | 2.15E-02 | 18581 | 0.216  | 0.081   | 0.350  | 0.069 | 3.133  | 0.023  | 1.73E-03 | 18733 |
| 121 | Thal_AV_L          | 0.010  | -0.027 | 0.047  | 0.019 | 0.544  | 0.004  | 5.87E-01 | 18581 | -0.085 | -0.139  | -0.031 | 0.028 | -3.067 | -0.022 | 2.16E-03 | 18733 |
| 122 | Thal_AV_R          | 0.028  | -0.025 | 0.080  | 0.027 | 1.028  | 0.008  | 3.04E-01 | 18581 | -0.116 | -0.193  | -0.038 | 0.039 | -2.932 | -0.021 | 3.37E-03 | 18733 |
| 123 | Thal_LP_L          | -0.004 | -0.044 | 0.037  | 0.021 | -0.180 | -0.001 | 8.57E-01 | 18581 | -0.129 | -0.189  | -0.069 | 0.031 | -4.208 | -0.031 | 2.58E-05 | 18733 |
| 124 | Thal_LP_R          | 0.011  | -0.042 | 0.064  | 0.027 | 0.414  | 0.003  | 6.79E-01 | 18581 | -0.160 | -0.238  | -0.082 | 0.040 | -4.020 | -0.029 | 5.83E-05 | 18733 |
| 125 | Thal_VA_L          | 0.016  | -0.027 | 0.060  | 0.022 | 0.729  | 0.005  | 4.66E-01 | 18581 | -0.044 | -0.108  | 0.019  | 0.033 | -1.365 | -0.010 | 1.72E-01 | 18733 |
| 126 | Thal_VA_R          | 0.006  | -0.048 | 0.059  | 0.027 | 0.206  | 0.002  | 8.36E-01 | 18581 | -0.043 | -0.121  | 0.036  | 0.040 | -1.065 | -0.008 | 2.87E-01 | 18733 |
| 127 | Thal_VL_L          | -0.068 | -0.191 | 0.056  | 0.063 | -1.075 | -0.008 | 2.82E-01 | 18581 | -0.151 | -0.332  | 0.031  | 0.093 | -1.622 | -0.012 | 1.05E-01 | 18733 |
| 128 | Thal_VL_R          | -0.125 | -0.289 | 0.039  | 0.084 | -1.491 | -0.011 | 1.36E-01 | 18581 | -0.337 | -0.579  | -0.096 | 0.123 | -2.739 | -0.020 | 6.17E-03 | 18733 |
| 129 | Thal_VPL_L         | -0.018 | -0.165 | 0.130  | 0.075 | -0.235 | -0.002 | 8.15E-01 | 18581 | -0.150 | -0.367  | 0.067  | 0.110 | -1.358 | -0.010 | 1.75E-01 | 18733 |
| 130 | Thal_VPL_R         | -0.056 | -0.211 | 0.098  | 0.079 | -0.716 | -0.005 | 4.74E-01 | 18581 | -0.362 | -0.590  | -0.135 | 0.116 | -3.119 | -0.023 | 1.82E-03 | 18733 |
| 131 | Thal_IL_L          | -0.053 | -0.117 | 0.010  | 0.032 | -1.644 | -0.012 | 1.00E-01 | 18581 | -0.231 | -0.324  | -0.137 | 0.048 | -4.828 | -0.035 | 1.39E-06 | 18733 |
| 132 | Thal_IL_R          | -0.016 | -0.088 | 0.056  | 0.037 | -0.431 | -0.003 | 6.66E-01 | 18581 | -0.291 | -0.398  | -0.185 | 0.054 | -5.379 | -0.039 | 7.60E-08 | 18733 |
| 133 | Thal_Re_L          | 0.000  | 0.000  | 0.000  | 0.000 | -0.111 | -0.001 | 9.12E-01 | 18581 | -0.001 | -0.001  | 0.000  | 0.000 | -2.950 | -0.022 | 3.18E-03 | 18733 |
| 134 | Thal_Re_R          | 0.000  | -0.002 | 0.002  | 0.001 | 0.263  | 0.002  | 7.92E-01 | 18581 | -0.005 | -0.008  | -0.002 | 0.002 | -3.015 | -0.022 | 2.57E-03 | 18733 |
| 135 | Thal_MDm_L         | -0.189 | -0.660 | 0.282  | 0.240 | -0.787 | -0.006 | 4.31E-01 | 18581 | -2.063 | -2.756  | -1.369 | 0.354 | -5.831 | -0.043 | 5.60E-09 | 18733 |
| 136 | Thal_MDm_R         | 0.044  | -0.503 | 0.592  | 0.279 | 0.158  | 0.001  | 8.74E-01 | 18581 | -2.262 | -3.068  | -1.457 | 0.411 | -5.503 | -0.040 | 3.77E-08 | 18733 |
| 137 | Thal_MDI_L         | -0.078 | -0.160 | 0.003  | 0.042 | -1.878 | -0.014 | 6.04E-02 | 18581 | -0.357 | -0.477  | -0.237 | 0.061 | -5.830 | -0.043 | 5.63E-09 | 18733 |
| 138 | Thal_MDI_R         | -0.017 | -0.110 | 0.076  | 0.047 | -0.359 | -0.003 | 7.20E-01 | 18581 | -0.397 | -0.534  | -0.261 | 0.070 | -5.707 | -0.042 | 1.16E-08 | 18733 |
| 139 | Thal_LGN_L         | 0.000  | -0.012 | 0.012  | 0.006 | 0.009  | 0.000  | 9.93E-01 | 18581 | -0.033 | -0.051  | -0.015 | 0.009 | -3.566 | -0.026 | 3.64E-04 | 18733 |
| 140 | Thal_LGN_R         | 0.000  | -0.026 | 0.026  | 0.013 | 0.009  | 0.000  | 9.93E-01 | 18581 | -0.097 | -0.136  | -0.058 | 0.020 | -4.903 | -0.036 | 9.54E-07 | 18733 |
| 141 | Thal_MGN_L         | -0.008 | -0.031 | 0.014  | 0.011 | -0.746 | -0.005 | 4.56E-01 | 18581 | -0.066 | -0.098  | -0.033 | 0.017 | -3.963 | -0.029 | 7.42E-05 | 18733 |

|     |            |        |        |        |       |        |        |          |       |        |        |        |       |        |        |          |       |
|-----|------------|--------|--------|--------|-------|--------|--------|----------|-------|--------|--------|--------|-------|--------|--------|----------|-------|
| 142 | Thal_MGN_R | 0.002  | -0.022 | 0.026  | 0.012 | 0.135  | 0.001  | 8.93E-01 | 18581 | -0.107 | -0.142 | -0.072 | 0.018 | -5.935 | -0.043 | 2.99E-09 | 18733 |
| 143 | Thal_PuA_L | -0.005 | -0.031 | 0.021  | 0.013 | -0.376 | -0.003 | 7.07E-01 | 18581 | -0.103 | -0.141 | -0.064 | 0.020 | -5.252 | -0.038 | 1.52E-07 | 18733 |
| 144 | Thal_PuA_R | 0.001  | -0.054 | 0.055  | 0.028 | 0.026  | 0.000  | 9.79E-01 | 18581 | -0.260 | -0.339 | -0.180 | 0.041 | -6.374 | -0.047 | 1.88E-10 | 18733 |
| 145 | Thal_PuM_L | -0.102 | -0.621 | 0.416  | 0.265 | -0.387 | -0.003 | 6.99E-01 | 18581 | -2.260 | -3.023 | -1.496 | 0.389 | -5.804 | -0.042 | 6.59E-09 | 18733 |
| 146 | Thal_PuM_R | -0.054 | -0.700 | 0.592  | 0.330 | -0.165 | -0.001 | 8.69E-01 | 18581 | -2.848 | -3.799 | -1.897 | 0.485 | -5.872 | -0.043 | 4.38E-09 | 18733 |
| 147 | Thal_PuL_L | -0.048 | -0.143 | 0.046  | 0.048 | -1.000 | -0.007 | 3.17E-01 | 18581 | -0.379 | -0.519 | -0.240 | 0.071 | -5.339 | -0.039 | 9.48E-08 | 18733 |
| 148 | Thal_PuL_R | -0.033 | -0.183 | 0.117  | 0.077 | -0.429 | -0.003 | 6.68E-01 | 18581 | -0.628 | -0.850 | -0.407 | 0.113 | -5.562 | -0.041 | 2.70E-08 | 18733 |
| 149 | Thal_PuL_L | 0.009  | -0.017 | 0.035  | 0.013 | 0.700  | 0.005  | 4.84E-01 | 18581 | -0.046 | -0.084 | -0.008 | 0.019 | -2.369 | -0.017 | 1.78E-02 | 18733 |
| 150 | Thal_PuL_R | 0.002  | -0.032 | 0.036  | 0.017 | 0.096  | 0.001  | 9.23E-01 | 18581 | -0.071 | -0.122 | -0.021 | 0.026 | -2.788 | -0.020 | 5.30E-03 | 18733 |
| 151 | ACC_sub_L  | -0.290 | -0.587 | 0.007  | 0.151 | -1.915 | -0.014 | 5.54E-02 | 18581 | -0.605 | -1.042 | -0.168 | 0.223 | -2.715 | -0.020 | 6.63E-03 | 18733 |
| 152 | ACC_sub_R  | -0.284 | -0.562 | -0.007 | 0.141 | -2.010 | -0.015 | 4.44E-02 | 18581 | -0.568 | -0.977 | -0.160 | 0.208 | -2.727 | -0.020 | 6.39E-03 | 18733 |
| 153 | ACC_pre_L  | -0.940 | -1.700 | -0.179 | 0.388 | -2.421 | -0.018 | 1.55E-02 | 18581 | -2.752 | -3.872 | -1.632 | 0.571 | -4.816 | -0.035 | 1.47E-06 | 18733 |
| 154 | ACC_pre_R  | -1.172 | -1.904 | -0.439 | 0.374 | -3.136 | -0.023 | 1.71E-03 | 18581 | -2.874 | -3.953 | -1.795 | 0.550 | -5.223 | -0.038 | 1.78E-07 | 18733 |
| 155 | ACC_sup_L  | -1.516 | -2.343 | -0.690 | 0.422 | -3.596 | -0.026 | 3.24E-04 | 18581 | -3.556 | -4.773 | -2.340 | 0.621 | -5.729 | -0.042 | 1.03E-08 | 18733 |
| 156 | ACC_sup_R  | -1.100 | -1.957 | -0.243 | 0.437 | -2.516 | -0.018 | 1.19E-02 | 18581 | -2.980 | -4.241 | -1.720 | 0.643 | -4.634 | -0.034 | 3.61E-06 | 18733 |
| 157 | N_Acc_L    | -0.116 | -0.364 | 0.133  | 0.127 | -0.910 | -0.007 | 3.63E-01 | 18581 | -0.820 | -1.187 | -0.454 | 0.187 | -4.391 | -0.032 | 1.14E-05 | 18733 |
| 158 | N_Acc_R    | -0.077 | -0.292 | 0.139  | 0.110 | -0.697 | -0.005 | 4.86E-01 | 18581 | -0.626 | -0.943 | -0.309 | 0.162 | -3.871 | -0.028 | 1.09E-04 | 18733 |
| 159 | VTA_L      | 0.001  | -0.008 | 0.010  | 0.004 | 0.210  | 0.002  | 8.33E-01 | 18581 | -0.011 | -0.024 | 0.002  | 0.007 | -1.630 | -0.012 | 1.03E-01 | 18733 |
| 160 | VTA_R      | 0.004  | -0.004 | 0.012  | 0.004 | 0.984  | 0.007  | 3.25E-01 | 18581 | -0.011 | -0.023 | 0.000  | 0.006 | -1.887 | -0.014 | 5.91E-02 | 18733 |
| 161 | SN_pc_L    | -0.009 | -0.023 | 0.005  | 0.007 | -1.207 | -0.009 | 2.28E-01 | 18581 | -0.018 | -0.039 | 0.002  | 0.011 | -1.747 | -0.013 | 8.06E-02 | 18733 |
| 162 | SN_pc_R    | -0.009 | -0.028 | 0.009  | 0.009 | -0.973 | -0.007 | 3.31E-01 | 18581 | -0.033 | -0.060 | -0.005 | 0.014 | -2.355 | -0.017 | 1.85E-02 | 18733 |
| 163 | SN_pr_L    | -0.020 | -0.039 | -0.001 | 0.010 | -2.025 | -0.015 | 4.29E-02 | 18581 | -0.007 | -0.036 | 0.021  | 0.014 | -0.517 | -0.004 | 6.05E-01 | 18733 |
| 164 | SN_pr_R    | -0.019 | -0.040 | 0.003  | 0.011 | -1.712 | -0.013 | 8.69E-02 | 18581 | -0.017 | -0.048 | 0.015  | 0.016 | -1.049 | -0.008 | 2.94E-01 | 18733 |
| 165 | Red_N_L    | -0.002 | -0.025 | 0.022  | 0.012 | -0.136 | -0.001 | 8.92E-01 | 18581 | -0.069 | -0.104 | -0.034 | 0.018 | -3.900 | -0.028 | 9.65E-05 | 18733 |
| 166 | Red_N_R    | -0.003 | -0.028 | 0.023  | 0.013 | -0.196 | -0.001 | 8.45E-01 | 18581 | -0.061 | -0.099 | -0.023 | 0.019 | -3.166 | -0.023 | 1.55E-03 | 18733 |
| 167 | LC_L       | 0.011  | 0.002  | 0.020  | 0.004 | 2.427  | 0.018  | 1.52E-02 | 18581 | -0.001 | -0.014 | 0.012  | 0.007 | -0.159 | -0.001 | 8.73E-01 | 18733 |
| 168 | LC_R       | 0.011  | 0.002  | 0.021  | 0.005 | 2.316  | 0.017  | 2.06E-02 | 18581 | 0.003  | -0.011 | 0.017  | 0.007 | 0.387  | 0.003  | 6.99E-01 | 18733 |
| 169 | Raphe_D    | 0.007  | -0.027 | 0.041  | 0.017 | 0.418  | 0.003  | 6.76E-01 | 18581 | -0.145 | -0.196 | -0.095 | 0.026 | -5.677 | -0.041 | 1.39E-08 | 18733 |
| 170 | Raphe_M    | 0.010  | 0.000  | 0.020  | 0.005 | 1.892  | 0.014  | 5.85E-02 | 18581 | -0.014 | -0.029 | 0.002  | 0.008 | -1.736 | -0.013 | 8.26E-02 | 18733 |

**Salad / raw vegetable intake**

**Poultry intake**

| Number | AAL 3 region        | beta    | 95%CI l  | 95%CI h | se     | t      | r      | p        | df.e  | beta     | 95%CI l  | 95%CI h | se     | t      | r      | p        | df.e  |
|--------|---------------------|---------|----------|---------|--------|--------|--------|----------|-------|----------|----------|---------|--------|--------|--------|----------|-------|
| 0      | Total brain         | -63.200 | -140.787 | 14.388  | 39.583 | -1.597 | -0.012 | 1.10E-01 | 18549 | -202.967 | -345.962 | -59.971 | 72.954 | -2.782 | -0.020 | 5.41E-03 | 18738 |
| 1      | Precentral_L        | -2.369  | -5.098   | 0.360   | 1.392  | -1.702 | -0.012 | 8.88E-02 | 18549 | -4.794   | -9.827   | 0.239   | 2.568  | -1.867 | -0.014 | 6.19E-02 | 18738 |
| 2      | Precentral_R        | -1.339  | -3.841   | 1.162   | 1.276  | -1.049 | -0.008 | 2.94E-01 | 18549 | -3.693   | -8.304   | 0.919   | 2.353  | -1.569 | -0.011 | 1.17E-01 | 18738 |
| 3      | Frontal_Sup_2_L     | -5.290  | -8.173   | -2.407  | 1.471  | -3.597 | -0.026 | 3.23E-04 | 18549 | -5.368   | -10.680  | -0.055  | 2.710  | -1.980 | -0.014 | 4.77E-02 | 18738 |
| 4      | Frontal_Sup_2_R     | -5.796  | -8.972   | -2.619  | 1.621  | -3.576 | -0.026 | 3.49E-04 | 18549 | -10.929  | -16.783  | -5.075  | 2.987  | -3.659 | -0.027 | 2.54E-04 | 18738 |
| 5      | Frontal_Mid_2_L     | -4.977  | -8.003   | -1.951  | 1.544  | -3.224 | -0.024 | 1.27E-03 | 18549 | -11.076  | -16.654  | -5.499  | 2.846  | -3.892 | -0.028 | 9.96E-05 | 18738 |
| 6      | Frontal_Mid_2_R     | -5.643  | -9.066   | -2.221  | 1.746  | -3.232 | -0.024 | 1.23E-03 | 18549 | -12.708  | -19.020  | -6.396  | 3.220  | -3.946 | -0.029 | 7.97E-05 | 18738 |
| 7      | Frontal_Inf_Oper_L  | -0.122  | -1.016   | 0.773   | 0.456  | -0.267 | -0.002 | 7.90E-01 | 18549 | -1.831   | -3.480   | -0.182  | 0.841  | -2.177 | -0.016 | 2.95E-02 | 18738 |
| 8      | Frontal_Inf_Oper_R  | -1.004  | -2.125   | 0.117   | 0.572  | -1.755 | -0.013 | 7.93E-02 | 18549 | -3.582   | -5.649   | -1.515  | 1.054  | -3.397 | -0.025 | 6.82E-04 | 18738 |
| 9      | Frontal_Inf_Tri_L   | -1.590  | -3.490   | 0.311   | 0.970  | -1.639 | -0.012 | 1.01E-01 | 18549 | -5.218   | -8.720   | -1.717  | 1.786  | -2.921 | -0.021 | 3.49E-03 | 18738 |
| 10     | Frontal_Inf_Tri_R   | -0.593  | -2.084   | 0.899   | 0.761  | -0.779 | -0.006 | 4.36E-01 | 18549 | -5.695   | -8.444   | -2.946  | 1.402  | -4.061 | -0.030 | 4.91E-05 | 18738 |
| 11     | Frontal_Inf_Orb_2_L | -0.233  | -0.801   | 0.336   | 0.290  | -0.802 | -0.006 | 4.23E-01 | 18549 | -1.412   | -2.459   | -0.366  | 0.534  | -2.645 | -0.019 | 8.17E-03 | 18738 |
| 12     | Frontal_Inf_Orb_2_R | -0.100  | -0.694   | 0.494   | 0.303  | -0.330 | -0.002 | 7.42E-01 | 18549 | -2.175   | -3.270   | -1.081  | 0.558  | -3.895 | -0.028 | 9.84E-05 | 18738 |
| 13     | Rolandic_Oper_L     | -0.285  | -1.144   | 0.574   | 0.438  | -0.651 | -0.005 | 5.15E-01 | 18549 | -2.181   | -3.764   | -0.598  | 0.808  | -2.700 | -0.020 | 6.94E-03 | 18738 |
| 14     | Rolandic_Oper_R     | -0.391  | -1.621   | 0.838   | 0.627  | -0.624 | -0.005 | 5.33E-01 | 18549 | -4.330   | -6.595   | -2.065  | 1.156  | -3.747 | -0.027 | 1.80E-04 | 18738 |
| 15     | Supp_Motor_Area_L   | -2.880  | -4.919   | -0.841  | 1.040  | -2.769 | -0.020 | 5.64E-03 | 18549 | -3.726   | -7.489   | 0.038   | 1.920  | -1.940 | -0.014 | 5.24E-02 | 18738 |
| 16     | Supp_Motor_Area_R   | -2.218  | -4.472   | 0.036   | 1.150  | -1.929 | -0.014 | 5.38E-02 | 18549 | -1.897   | -6.056   | 2.262   | 2.122  | -0.894 | -0.007 | 3.71E-01 | 18738 |

|    |                      |        |        |        |       |        |        |          |       |         |         |        |       |        |        |          |       |
|----|----------------------|--------|--------|--------|-------|--------|--------|----------|-------|---------|---------|--------|-------|--------|--------|----------|-------|
| 17 | Olfactory_L          | -0.409 | -0.713 | -0.106 | 0.155 | -2.641 | -0.019 | 8.26E-03 | 18549 | -0.132  | -0.692  | 0.427  | 0.285 | -0.464 | -0.003 | 6.43E-01 | 18738 |
| 18 | Olfactory_R          | -0.467 | -0.772 | -0.162 | 0.155 | -3.004 | -0.022 | 2.66E-03 | 18549 | -0.286  | -0.847  | 0.275  | 0.286 | -0.998 | -0.007 | 3.18E-01 | 18738 |
| 19 | Frontal_Sup_Medial_L | -2.252 | -4.166 | -0.338 | 0.977 | -2.306 | -0.017 | 2.11E-02 | 18549 | -8.542  | -12.067 | -5.018 | 1.798 | -4.750 | -0.035 | 2.05E-06 | 18738 |
| 20 | Frontal_Sup_Medial_R | -2.108 | -3.502 | -0.715 | 0.711 | -2.965 | -0.022 | 3.03E-03 | 18549 | -4.683  | -7.250  | -2.117 | 1.309 | -3.577 | -0.026 | 3.49E-04 | 18738 |
| 21 | Frontal_Med_Orb_L    | -1.111 | -1.826 | -0.396 | 0.365 | -3.044 | -0.022 | 2.33E-03 | 18549 | -1.311  | -2.629  | 0.007  | 0.672 | -1.950 | -0.014 | 5.11E-02 | 18738 |
| 22 | Frontal_Med_Orb_R    | -1.450 | -2.329 | -0.571 | 0.448 | -3.233 | -0.024 | 1.23E-03 | 18549 | -2.100  | -3.720  | -0.480 | 0.826 | -2.541 | -0.019 | 1.11E-02 | 18738 |
| 23 | Rectus_L             | -0.990 | -1.730 | -0.249 | 0.378 | -2.621 | -0.019 | 8.78E-03 | 18549 | -1.420  | -2.784  | -0.057 | 0.696 | -2.042 | -0.015 | 4.12E-02 | 18738 |
| 24 | Rectus_R             | -0.984 | -1.669 | -0.300 | 0.349 | -2.819 | -0.021 | 4.83E-03 | 18549 | -1.313  | -2.574  | -0.052 | 0.644 | -2.040 | -0.015 | 4.13E-02 | 18738 |
| 25 | OFCmed_L             | -0.605 | -1.034 | -0.175 | 0.219 | -2.761 | -0.020 | 5.76E-03 | 18549 | -1.128  | -1.918  | -0.338 | 0.403 | -2.798 | -0.020 | 5.15E-03 | 18738 |
| 26 | OFCmed_R             | -0.755 | -1.255 | -0.255 | 0.255 | -2.961 | -0.022 | 3.07E-03 | 18549 | -1.107  | -2.028  | -0.186 | 0.470 | -2.357 | -0.017 | 1.84E-02 | 18738 |
| 27 | OFCant_L             | -0.735 | -1.232 | -0.239 | 0.253 | -2.904 | -0.021 | 3.68E-03 | 18549 | -0.539  | -1.453  | 0.376  | 0.466 | -1.155 | -0.008 | 2.48E-01 | 18738 |
| 28 | OFCant_R             | -0.829 | -1.485 | -0.173 | 0.335 | -2.479 | -0.018 | 1.32E-02 | 18549 | -1.620  | -2.828  | -0.413 | 0.616 | -2.630 | -0.019 | 8.53E-03 | 18738 |
| 29 | OFCpost_L            | -0.604 | -1.225 | 0.017  | 0.317 | -1.906 | -0.014 | 5.67E-02 | 18549 | -0.326  | -1.471  | 0.818  | 0.584 | -0.559 | -0.004 | 5.76E-01 | 18738 |
| 30 | OFCpost_R            | -0.733 | -1.308 | -0.159 | 0.293 | -2.504 | -0.018 | 1.23E-02 | 18549 | -1.245  | -2.303  | -0.187 | 0.540 | -2.307 | -0.017 | 2.11E-02 | 18738 |
| 31 | OFClat_L             | -0.079 | -0.289 | 0.131  | 0.107 | -0.738 | -0.005 | 4.61E-01 | 18549 | -0.689  | -1.075  | -0.303 | 0.197 | -3.501 | -0.026 | 4.65E-04 | 18738 |
| 32 | OFClat_R             | -0.138 | -0.315 | 0.039  | 0.090 | -1.523 | -0.011 | 1.28E-01 | 18549 | -0.729  | -1.055  | -0.403 | 0.166 | -4.382 | -0.032 | 1.18E-05 | 18738 |
| 33 | Insula_L             | -1.396 | -3.317 | 0.526  | 0.980 | -1.424 | -0.010 | 1.55E-01 | 18549 | -2.341  | -5.881  | 1.198  | 1.806 | -1.297 | -0.009 | 1.95E-01 | 18738 |
| 34 | Insula_R             | -1.241 | -3.113 | 0.631  | 0.955 | -1.299 | -0.010 | 1.94E-01 | 18549 | -2.938  | -6.387  | 0.512  | 1.760 | -1.669 | -0.012 | 9.51E-02 | 18738 |
| 37 | Cingulate_Mid_L      | -1.012 | -2.636 | 0.612  | 0.828 | -1.222 | -0.009 | 2.22E-01 | 18549 | -6.147  | -9.138  | -3.156 | 1.526 | -4.028 | -0.029 | 5.65E-05 | 18738 |
| 38 | Cingulate_Mid_R      | -1.190 | -2.922 | 0.541  | 0.883 | -1.347 | -0.010 | 1.78E-01 | 18549 | -7.117  | -10.307 | -3.927 | 1.627 | -4.373 | -0.032 | 1.23E-05 | 18738 |
| 39 | Cingulate_Post_L     | -0.125 | -0.622 | 0.371  | 0.253 | -0.496 | -0.004 | 6.20E-01 | 18549 | -0.961  | -1.875  | -0.047 | 0.466 | -2.061 | -0.015 | 3.94E-02 | 18738 |
| 40 | Cingulate_Post_R     | -0.155 | -0.430 | 0.120  | 0.140 | -1.106 | -0.008 | 2.69E-01 | 18549 | -0.317  | -0.824  | 0.190  | 0.259 | -1.225 | -0.009 | 2.21E-01 | 18738 |
| 41 | Hippocampus_L        | -0.314 | -1.116 | 0.489  | 0.409 | -0.766 | -0.006 | 4.44E-01 | 18549 | -1.542  | -3.021  | -0.064 | 0.754 | -2.045 | -0.015 | 4.09E-02 | 18738 |
| 42 | Hippocampus_R        | -0.232 | -1.064 | 0.601  | 0.425 | -0.546 | -0.004 | 5.85E-01 | 18549 | -1.014  | -2.547  | 0.518  | 0.782 | -1.297 | -0.009 | 1.95E-01 | 18738 |
| 43 | ParaHippocampal_L    | -0.014 | -0.726 | 0.698  | 0.363 | -0.039 | 0.000  | 9.69E-01 | 18549 | -1.320  | -2.634  | -0.006 | 0.670 | -1.969 | -0.014 | 4.90E-02 | 18738 |
| 44 | ParaHippocampal_R    | -0.367 | -1.267 | 0.532  | 0.459 | -0.800 | -0.006 | 4.24E-01 | 18549 | -1.875  | -3.533  | -0.217 | 0.846 | -2.217 | -0.016 | 2.66E-02 | 18738 |
| 45 | Amygdala_L           | -0.155 | -0.432 | 0.123  | 0.141 | -1.093 | -0.008 | 2.74E-01 | 18549 | -0.067  | -0.578  | 0.443  | 0.261 | -0.258 | -0.002 | 7.96E-01 | 18738 |
| 46 | Amygdala_R           | -0.214 | -0.498 | 0.069  | 0.145 | -1.481 | -0.011 | 1.39E-01 | 18549 | -0.096  | -0.618  | 0.426  | 0.266 | -0.360 | -0.003 | 7.19E-01 | 18738 |
| 47 | Calcarine_L          | 0.373  | -2.270 | 3.016  | 1.348 | 0.277  | 0.002  | 7.82E-01 | 18549 | -0.820  | -5.690  | 4.050  | 2.485 | -0.330 | -0.002 | 7.41E-01 | 18738 |
| 48 | Calcarine_R          | 0.935  | -1.274 | 3.144  | 1.127 | 0.830  | 0.006  | 4.07E-01 | 18549 | -2.661  | -6.732  | 1.409  | 2.077 | -1.281 | -0.009 | 2.00E-01 | 18738 |
| 49 | Cuneus_L             | -0.589 | -2.246 | 1.068  | 0.845 | -0.697 | -0.005 | 4.86E-01 | 18549 | 0.377   | -2.679  | 3.432  | 1.559 | 0.242  | 0.002  | 8.09E-01 | 18738 |
| 50 | Cuneus_R             | 0.235  | -1.034 | 1.504  | 0.647 | 0.363  | 0.003  | 7.17E-01 | 18549 | -1.605  | -3.943  | 0.733  | 1.193 | -1.345 | -0.010 | 1.79E-01 | 18738 |
| 51 | Lingual_L            | 0.428  | -1.162 | 2.018  | 0.811 | 0.527  | 0.004  | 5.98E-01 | 18549 | -2.167  | -5.095  | 0.761  | 1.494 | -1.450 | -0.011 | 1.47E-01 | 18738 |
| 52 | Lingual_R            | -0.002 | -1.668 | 1.664  | 0.850 | -0.002 | 0.000  | 9.98E-01 | 18549 | -1.972  | -5.041  | 1.097  | 1.566 | -1.259 | -0.009 | 2.08E-01 | 18738 |
| 53 | Occipital_Sup_L      | 0.065  | -1.029 | 1.158  | 0.558 | 0.116  | 0.001  | 9.08E-01 | 18549 | -2.468  | -4.481  | -0.455 | 1.027 | -2.403 | -0.018 | 1.63E-02 | 18738 |
| 54 | Occipital_Sup_R      | 0.223  | -0.962 | 1.408  | 0.605 | 0.369  | 0.003  | 7.12E-01 | 18549 | -2.647  | -4.829  | -0.464 | 1.114 | -2.377 | -0.017 | 1.75E-02 | 18738 |
| 55 | Occipital_Mid_L      | -0.276 | -2.839 | 2.286  | 1.307 | -0.211 | -0.002 | 8.33E-01 | 18549 | -1.343  | -6.064  | 3.378  | 2.409 | -0.558 | -0.004 | 5.77E-01 | 18738 |
| 56 | Occipital_Mid_R      | -1.520 | -3.303 | 0.262  | 0.909 | -1.672 | -0.012 | 9.46E-02 | 18549 | 0.231   | -3.054  | 3.515  | 1.676 | 0.138  | 0.001  | 8.91E-01 | 18738 |
| 57 | Occipital_Inf_L      | -0.024 | -0.875 | 0.827  | 0.434 | -0.055 | 0.000  | 9.56E-01 | 18549 | 0.966   | -0.601  | 2.533  | 0.799 | 1.208  | 0.009  | 2.27E-01 | 18738 |
| 58 | Occipital_Inf_R      | -1.530 | -2.513 | -0.548 | 0.501 | -3.053 | -0.022 | 2.27E-03 | 18549 | 2.589   | 0.779   | 4.399  | 0.923 | 2.804  | 0.020  | 5.05E-03 | 18738 |
| 59 | Fusiform_L           | 0.013  | -1.848 | 1.874  | 0.949 | 0.014  | 0.000  | 9.89E-01 | 18549 | 0.164   | -3.266  | 3.594  | 1.750 | 0.094  | 0.001  | 9.25E-01 | 18738 |
| 60 | Fusiform_R           | 0.189  | -1.858 | 2.235  | 1.044 | 0.181  | 0.001  | 8.57E-01 | 18549 | -0.980  | -4.751  | 2.792  | 1.924 | -0.509 | -0.004 | 6.11E-01 | 18738 |
| 61 | Postcentral_L        | -0.534 | -3.335 | 2.267  | 1.429 | -0.374 | -0.003 | 7.09E-01 | 18549 | -11.579 | -16.736 | -6.423 | 2.631 | -4.402 | -0.032 | 1.08E-05 | 18738 |
| 62 | Postcentral_R        | 1.230  | -1.642 | 4.101  | 1.465 | 0.839  | 0.006  | 4.01E-01 | 18549 | -9.488  | -14.774 | -4.201 | 2.697 | -3.518 | -0.026 | 4.36E-04 | 18738 |
| 63 | Parietal_Sup_L       | -0.549 | -2.163 | 1.064  | 0.823 | -0.667 | -0.005 | 5.05E-01 | 18549 | -3.459  | -6.431  | -0.487 | 1.516 | -2.282 | -0.017 | 2.25E-02 | 18738 |
| 64 | Parietal_Sup_R       | 0.372  | -1.060 | 1.803  | 0.730 | 0.509  | 0.004  | 6.11E-01 | 18549 | -3.066  | -5.702  | -0.430 | 1.345 | -2.280 | -0.017 | 2.26E-02 | 18738 |
| 65 | Parietal_Inf_L       | -1.130 | -3.243 | 0.983  | 1.078 | -1.048 | -0.008 | 2.95E-01 | 18549 | -3.846  | -7.737  | 0.045  | 1.985 | -1.937 | -0.014 | 5.27E-02 | 18738 |
| 66 | Parietal_Inf_R       | -0.819 | -2.187 | 0.550  | 0.698 | -1.173 | -0.009 | 2.41E-01 | 18549 | -1.924  | -4.445  | 0.597  | 1.286 | -1.496 | -0.011 | 1.35E-01 | 18738 |

|     |                     |        |        |        |       |        |        |          |       |        |         |        |       |        |        |          |       |
|-----|---------------------|--------|--------|--------|-------|--------|--------|----------|-------|--------|---------|--------|-------|--------|--------|----------|-------|
| 67  | SupraMarginal_L     | -0.615 | -1.853 | 0.623  | 0.632 | -0.974 | -0.007 | 3.30E-01 | 18549 | -3.739 | -6.019  | -1.458 | 1.163 | -3.214 | -0.023 | 1.31E-03 | 18738 |
| 68  | SupraMarginal_R     | -1.513 | -3.264 | 0.238  | 0.893 | -1.694 | -0.012 | 9.03E-02 | 18549 | -4.789 | -8.015  | -1.563 | 1.646 | -2.910 | -0.021 | 3.62E-03 | 18738 |
| 69  | Angular_L           | -0.643 | -1.859 | 0.572  | 0.620 | -1.037 | -0.008 | 3.00E-01 | 18549 | 0.431  | -1.810  | 2.671  | 1.143 | 0.377  | 0.003  | 7.06E-01 | 18738 |
| 70  | Angular_R           | -0.653 | -2.283 | 0.977  | 0.832 | -0.786 | -0.006 | 4.32E-01 | 18549 | -0.695 | -3.700  | 2.309  | 1.533 | -0.453 | -0.003 | 6.50E-01 | 18738 |
| 71  | Precuneus_L         | -1.947 | -4.910 | 1.015  | 1.511 | -1.288 | -0.009 | 1.98E-01 | 18549 | -5.068 | -10.527 | 0.392  | 2.785 | -1.819 | -0.013 | 6.89E-02 | 18738 |
| 72  | Precuneus_R         | -1.916 | -4.557 | 0.725  | 1.347 | -1.422 | -0.010 | 1.55E-01 | 18549 | -4.502 | -9.366  | 0.362  | 2.481 | -1.814 | -0.013 | 6.96E-02 | 18738 |
| 73  | Paracentra_Lobule_L | -0.509 | -1.865 | 0.847  | 0.692 | -0.736 | -0.005 | 4.62E-01 | 18549 | -1.105 | -3.605  | 1.396  | 1.276 | -0.866 | -0.006 | 3.87E-01 | 18738 |
| 74  | Paracentra_Lobule_R | 0.154  | -0.817 | 1.125  | 0.496 | 0.310  | 0.002  | 7.56E-01 | 18549 | -0.721 | -2.512  | 1.070  | 0.914 | -0.789 | -0.006 | 4.30E-01 | 18738 |
| 75  | Caudate_L           | -1.126 | -2.211 | -0.042 | 0.553 | -2.035 | -0.015 | 4.18E-02 | 18549 | -2.689 | -4.686  | -0.692 | 1.019 | -2.639 | -0.019 | 8.31E-03 | 18738 |
| 76  | Caudate_R           | -1.443 | -2.670 | -0.216 | 0.626 | -2.304 | -0.017 | 2.12E-02 | 18549 | -2.846 | -5.106  | -0.585 | 1.153 | -2.468 | -0.018 | 1.36E-02 | 18738 |
| 77  | Putamen_L           | -0.027 | -1.674 | 1.621  | 0.840 | -0.032 | 0.000  | 9.75E-01 | 18549 | -0.646 | -3.679  | 2.388  | 1.548 | -0.417 | -0.003 | 6.77E-01 | 18738 |
| 78  | Putamen_R           | -0.190 | -1.867 | 1.486  | 0.855 | -0.222 | -0.002 | 8.24E-01 | 18549 | -0.278 | -3.367  | 2.811  | 1.576 | -0.176 | -0.001 | 8.60E-01 | 18738 |
| 79  | Pallidum_L          | 0.024  | -0.122 | 0.170  | 0.075 | 0.321  | 0.002  | 7.48E-01 | 18549 | -0.200 | -0.469  | 0.070  | 0.138 | -1.453 | -0.011 | 1.46E-01 | 18738 |
| 80  | Pallidum_R          | 0.034  | -0.127 | 0.195  | 0.082 | 0.415  | 0.003  | 6.78E-01 | 18549 | -0.146 | -0.442  | 0.150  | 0.151 | -0.965 | -0.007 | 3.35E-01 | 18738 |
| 83  | Heschl_L            | -0.117 | -0.413 | 0.180  | 0.151 | -0.770 | -0.006 | 4.41E-01 | 18549 | -0.600 | -1.147  | -0.053 | 0.279 | -2.151 | -0.016 | 3.15E-02 | 18738 |
| 84  | Heschl_R            | -0.213 | -0.544 | 0.119  | 0.169 | -1.257 | -0.009 | 2.09E-01 | 18549 | -0.909 | -1.520  | -0.298 | 0.312 | -2.917 | -0.021 | 3.53E-03 | 18738 |
| 85  | Temporal_Sup_L      | -1.295 | -3.438 | 0.847  | 1.093 | -1.185 | -0.009 | 2.36E-01 | 18549 | -6.253 | -10.199 | -2.306 | 2.013 | -3.106 | -0.023 | 1.90E-03 | 18738 |
| 86  | Temporal_Sup_R      | -0.677 | -3.048 | 1.693  | 1.209 | -0.560 | -0.004 | 5.75E-01 | 18549 | -8.759 | -13.124 | -4.395 | 2.227 | -3.933 | -0.029 | 8.40E-05 | 18738 |
| 87  | Temporal_Pole_Sup_L | -1.333 | -2.347 | -0.319 | 0.517 | -2.577 | -0.019 | 9.98E-03 | 18549 | -0.858 | -2.729  | 1.012  | 0.954 | -0.900 | -0.007 | 3.68E-01 | 18738 |
| 88  | Temporal_Pole_Sup_R | -0.500 | -1.569 | 0.568  | 0.545 | -0.917 | -0.007 | 3.59E-01 | 18549 | -1.622 | -3.591  | 0.348  | 1.005 | -1.614 | -0.012 | 1.07E-01 | 18738 |
| 89  | Temporal_Mid_L      | -1.954 | -5.527 | 1.618  | 1.823 | -1.072 | -0.008 | 2.84E-01 | 18549 | -5.161 | -11.742 | 1.419  | 3.357 | -1.537 | -0.011 | 1.24E-01 | 18738 |
| 90  | Temporal_Mid_R      | -3.749 | -6.920 | -0.578 | 1.618 | -2.318 | -0.017 | 2.05E-02 | 18549 | -3.069 | -8.912  | 2.774  | 2.981 | -1.030 | -0.008 | 3.03E-01 | 18738 |
| 91  | Temporal_Pole_Mid_L | -0.173 | -1.026 | 0.679  | 0.435 | -0.399 | -0.003 | 6.90E-01 | 18549 | -0.657 | -2.229  | 0.914  | 0.802 | -0.820 | -0.006 | 4.12E-01 | 18738 |
| 92  | Temporal_Pole_Mid_R | -0.466 | -1.503 | 0.571  | 0.529 | -0.881 | -0.006 | 3.79E-01 | 18549 | -1.606 | -3.516  | 0.305  | 0.975 | -1.647 | -0.012 | 9.95E-02 | 18738 |
| 93  | Temporal_Inf_L      | -1.032 | -3.487 | 1.424  | 1.253 | -0.823 | -0.006 | 4.10E-01 | 18549 | -0.710 | -5.233  | 3.813  | 2.308 | -0.308 | -0.002 | 7.58E-01 | 18738 |
| 94  | Temporal_Inf_R      | -4.859 | -7.538 | -2.181 | 1.366 | -3.556 | -0.026 | 3.77E-04 | 18549 | 0.651  | -4.282  | 5.584  | 2.517 | 0.259  | 0.002  | 7.96E-01 | 18738 |
| 95  | Cerebellum_Crus1_L  | 2.777  | -0.136 | 5.691  | 1.487 | 1.868  | 0.014  | 6.17E-02 | 18549 | 6.546  | 1.177   | 11.914 | 2.739 | 2.390  | 0.017  | 1.69E-02 | 18738 |
| 96  | Cerebellum_Crus1_R  | 2.592  | -0.378 | 5.562  | 1.515 | 1.711  | 0.013  | 8.72E-02 | 18549 | 6.116  | 0.641   | 11.592 | 2.793 | 2.190  | 0.016  | 2.86E-02 | 18738 |
| 97  | Cerebellum_Crus2_L  | 2.123  | -0.187 | 4.433  | 1.179 | 1.801  | 0.013  | 7.17E-02 | 18549 | 1.887  | -2.373  | 6.147  | 2.174 | 0.868  | 0.006  | 3.85E-01 | 18738 |
| 98  | Cerebellum_Crus2_R  | 2.758  | 0.621  | 4.896  | 1.090 | 2.530  | 0.019  | 1.14E-02 | 18549 | 3.497  | -0.444  | 7.437  | 2.010 | 1.739  | 0.013  | 8.20E-02 | 18738 |
| 99  | Cerebellum_3_L      | 0.101  | -0.055 | 0.256  | 0.079 | 1.269  | 0.009  | 2.04E-01 | 18549 | 0.479  | 0.194   | 0.765  | 0.146 | 3.287  | 0.024  | 1.01E-03 | 18738 |
| 100 | Cerebellum_3_R      | 0.150  | -0.059 | 0.360  | 0.107 | 1.407  | 0.010  | 1.59E-01 | 18549 | 0.491  | 0.105   | 0.877  | 0.197 | 2.494  | 0.018  | 1.26E-02 | 18738 |
| 101 | Cerebellum_4_5_L    | 1.456  | 0.202  | 2.711  | 0.640 | 2.276  | 0.017  | 2.28E-02 | 18549 | 1.828  | -0.484  | 4.140  | 1.180 | 1.550  | 0.011  | 1.21E-01 | 18738 |
| 102 | Cerebellum_4_5_R    | 1.082  | 0.059  | 2.104  | 0.522 | 2.073  | 0.015  | 3.82E-02 | 18549 | 0.471  | -1.412  | 2.355  | 0.961 | 0.490  | 0.004  | 6.24E-01 | 18738 |
| 103 | Cerebellum_6_L      | 2.685  | 0.515  | 4.855  | 1.107 | 2.426  | 0.018  | 1.53E-02 | 18549 | 4.033  | 0.037   | 8.028  | 2.038 | 1.978  | 0.014  | 4.79E-02 | 18738 |
| 104 | Cerebellum_6_R      | 2.555  | 0.269  | 4.841  | 1.166 | 2.191  | 0.016  | 2.85E-02 | 18549 | 4.185  | -0.024  | 8.395  | 2.148 | 1.949  | 0.014  | 5.13E-02 | 18738 |
| 105 | Cerebellum_7b_L     | 0.622  | -0.085 | 1.328  | 0.360 | 1.725  | 0.013  | 8.45E-02 | 18549 | 0.557  | -0.745  | 1.859  | 0.664 | 0.838  | 0.006  | 4.02E-01 | 18738 |
| 106 | Cerebellum_7b_R     | 0.923  | 0.223  | 1.623  | 0.357 | 2.585  | 0.019  | 9.74E-03 | 18549 | 0.019  | -1.272  | 1.310  | 0.659 | 0.029  | 0.000  | 9.77E-01 | 18738 |
| 107 | Cerebellum_8_L      | 1.695  | -0.547 | 3.937  | 1.144 | 1.482  | 0.011  | 1.38E-01 | 18549 | 4.832  | 0.699   | 8.964  | 2.108 | 2.291  | 0.017  | 2.19E-02 | 18738 |
| 108 | Cerebellum_8_R      | 2.823  | -0.097 | 5.743  | 1.490 | 1.895  | 0.014  | 5.81E-02 | 18549 | 1.156  | -4.225  | 6.538  | 2.746 | 0.421  | 0.003  | 6.74E-01 | 18738 |
| 109 | Cerebellum_9_L      | 1.494  | 0.225  | 2.762  | 0.647 | 2.308  | 0.017  | 2.10E-02 | 18549 | 5.111  | 2.775   | 7.447  | 1.192 | 4.288  | 0.031  | 1.81E-05 | 18738 |
| 110 | Cerebellum_9_R      | 1.335  | 0.087  | 2.582  | 0.636 | 2.097  | 0.015  | 3.60E-02 | 18549 | 4.378  | 2.081   | 6.675  | 1.172 | 3.736  | 0.027  | 1.88E-04 | 18738 |
| 111 | Cerebellum_10_L     | -0.001 | -0.091 | 0.088  | 0.046 | -0.032 | 0.000  | 9.75E-01 | 18549 | 0.357  | 0.191   | 0.523  | 0.085 | 4.222  | 0.031  | 2.43E-05 | 18738 |
| 112 | Cerebellum_10_R     | 0.049  | -0.044 | 0.143  | 0.048 | 1.034  | 0.008  | 3.01E-01 | 18549 | 0.233  | 0.061   | 0.406  | 0.088 | 2.653  | 0.019  | 7.98E-03 | 18738 |
| 113 | Vermis_1_2          | 0.016  | -0.043 | 0.074  | 0.030 | 0.522  | 0.004  | 6.02E-01 | 18549 | 0.172  | 0.064   | 0.280  | 0.055 | 3.132  | 0.023  | 1.74E-02 | 18738 |
| 114 | Vermis_3            | 0.029  | -0.204 | 0.261  | 0.119 | 0.241  | 0.002  | 8.10E-01 | 18549 | 0.501  | 0.072   | 0.929  | 0.219 | 2.290  | 0.017  | 2.21E-02 | 18738 |
| 115 | Vermis_4_5          | 0.750  | 0.067  | 1.434  | 0.349 | 2.151  | 0.016  | 3.15E-02 | 18549 | 0.840  | -0.419  | 2.100  | 0.643 | 1.308  | 0.010  | 1.91E-01 | 18738 |
| 116 | Vermis_6            | 0.372  | -0.008 | 0.753  | 0.194 | 1.917  | 0.014  | 5.53E-02 | 18549 | 1.031  | 0.330   | 1.732  | 0.358 | 2.884  | 0.021  | 3.93E-03 | 18738 |

|     |            |        |        |        |       |        |        |          |       |        |        |        |       |        |        |          |       |
|-----|------------|--------|--------|--------|-------|--------|--------|----------|-------|--------|--------|--------|-------|--------|--------|----------|-------|
| 117 | Vermis_7   | 0.225  | 0.009  | 0.440  | 0.110 | 2.046  | 0.015  | 4.07E-02 | 18549 | 0.543  | 0.147  | 0.940  | 0.202 | 2.688  | 0.020  | 7.19E-03 | 18738 |
| 118 | Vermis_8   | 0.475  | 0.121  | 0.828  | 0.180 | 2.633  | 0.019  | 8.46E-03 | 18549 | 1.160  | 0.508  | 1.811  | 0.332 | 3.490  | 0.025  | 4.85E-04 | 18738 |
| 119 | Vermis_9   | 0.453  | 0.166  | 0.740  | 0.146 | 3.099  | 0.023  | 1.95E-03 | 18549 | 1.017  | 0.489  | 1.545  | 0.269 | 3.775  | 0.028  | 1.61E-04 | 18738 |
| 120 | Vermis_10  | 0.097  | 0.017  | 0.177  | 0.041 | 2.384  | 0.017  | 1.71E-02 | 18549 | 0.346  | 0.198  | 0.493  | 0.075 | 4.605  | 0.034  | 4.16E-06 | 18738 |
| 121 | Thal_AV_L  | -0.023 | -0.055 | 0.009  | 0.016 | -1.421 | -0.010 | 1.55E-01 | 18549 | -0.050 | -0.109 | 0.009  | 0.030 | -1.646 | -0.012 | 9.97E-02 | 18738 |
| 122 | Thal_AV_R  | -0.039 | -0.084 | 0.007  | 0.023 | -1.648 | -0.012 | 9.94E-02 | 18549 | -0.073 | -0.157 | 0.012  | 0.043 | -1.687 | -0.012 | 9.17E-02 | 18738 |
| 123 | Thal_LP_L  | -0.015 | -0.051 | 0.020  | 0.018 | -0.841 | -0.006 | 4.01E-01 | 18549 | -0.097 | -0.163 | -0.032 | 0.033 | -2.914 | -0.021 | 3.57E-03 | 18738 |
| 124 | Thal_LP_R  | -0.022 | -0.069 | 0.024  | 0.024 | -0.954 | -0.007 | 3.40E-01 | 18549 | -0.105 | -0.190 | -0.020 | 0.043 | -2.412 | -0.018 | 1.59E-02 | 18738 |
| 125 | Thal_VA_L  | -0.030 | -0.068 | 0.008  | 0.019 | -1.553 | -0.011 | 1.21E-01 | 18549 | -0.015 | -0.084 | 0.055  | 0.036 | -0.411 | -0.003 | 6.81E-01 | 18738 |
| 126 | Thal_VA_R  | -0.060 | -0.107 | -0.013 | 0.024 | -2.528 | -0.019 | 1.15E-02 | 18549 | -0.035 | -0.121 | 0.050  | 0.044 | -0.809 | -0.006 | 4.18E-01 | 18738 |
| 127 | Thal_VL_L  | -0.150 | -0.258 | -0.042 | 0.055 | -2.734 | -0.020 | 6.27E-03 | 18549 | -0.139 | -0.337 | 0.060  | 0.101 | -1.371 | -0.010 | 1.70E-01 | 18738 |
| 128 | Thal_VL_R  | -0.202 | -0.345 | -0.058 | 0.073 | -2.761 | -0.020 | 5.77E-03 | 18549 | -0.305 | -0.569 | -0.042 | 0.134 | -2.269 | -0.017 | 2.33E-02 | 18738 |
| 129 | Thal_VPL_L | 0.008  | -0.120 | 0.136  | 0.065 | 0.118  | 0.001  | 9.06E-01 | 18549 | -0.107 | -0.343 | 0.129  | 0.121 | -0.889 | -0.006 | 3.74E-01 | 18738 |
| 130 | Thal_VPL_R | 0.013  | -0.122 | 0.147  | 0.069 | 0.183  | 0.001  | 8.54E-01 | 18549 | -0.197 | -0.446 | 0.051  | 0.127 | -1.557 | -0.011 | 1.19E-01 | 18738 |
| 131 | Thal_IL_L  | -0.023 | -0.078 | 0.033  | 0.028 | -0.810 | -0.006 | 4.18E-01 | 18549 | -0.167 | -0.270 | -0.065 | 0.052 | -3.207 | -0.023 | 1.34E-03 | 18738 |
| 132 | Thal_IL_R  | -0.042 | -0.104 | 0.021  | 0.032 | -1.297 | -0.010 | 1.95E-01 | 18549 | -0.160 | -0.276 | -0.044 | 0.059 | -2.708 | -0.020 | 6.77E-03 | 18738 |
| 133 | Thal_Re_L  | 0.000  | 0.000  | 0.000  | 0.000 | -0.074 | -0.001 | 9.41E-01 | 18549 | 0.000  | -0.001 | 0.000  | 0.000 | -0.564 | -0.004 | 5.72E-01 | 18738 |
| 134 | Thal_Re_R  | -0.003 | -0.005 | -0.001 | 0.001 | -2.855 | -0.021 | 4.31E-03 | 18549 | -0.002 | -0.005 | 0.002  | 0.002 | -0.987 | -0.007 | 3.24E-01 | 18738 |
| 135 | Thal_MDm_L | -0.389 | -0.800 | 0.021  | 0.209 | -1.859 | -0.014 | 6.31E-02 | 18549 | -1.251 | -2.008 | -0.493 | 0.386 | -3.238 | -0.024 | 1.21E-03 | 18738 |
| 136 | Thal_MDm_R | -0.440 | -0.917 | 0.038  | 0.243 | -1.805 | -0.013 | 7.10E-02 | 18549 | -0.977 | -1.857 | -0.097 | 0.449 | -2.177 | -0.016 | 2.95E-02 | 18738 |
| 137 | Thal_MDI_L | -0.071 | -0.143 | 0.000  | 0.036 | -1.968 | -0.014 | 4.90E-02 | 18549 | -0.227 | -0.359 | -0.096 | 0.067 | -3.400 | -0.025 | 6.76E-04 | 18738 |
| 138 | Thal_MDI_R | -0.083 | -0.164 | -0.002 | 0.041 | -2.008 | -0.015 | 4.47E-02 | 18549 | -0.201 | -0.350 | -0.052 | 0.076 | -2.646 | -0.019 | 8.16E-03 | 18738 |
| 139 | Thal_LGN_L | -0.003 | -0.013 | 0.008  | 0.006 | -0.479 | -0.004 | 6.32E-01 | 18549 | -0.036 | -0.056 | -0.016 | 0.010 | -3.569 | -0.026 | 3.59E-04 | 18738 |
| 140 | Thal_LGN_R | -0.009 | -0.032 | 0.014  | 0.012 | -0.747 | -0.005 | 4.55E-01 | 18549 | -0.099 | -0.141 | -0.056 | 0.022 | -4.572 | -0.033 | 4.85E-06 | 18738 |
| 141 | Thal_MGN_L | -0.005 | -0.024 | 0.014  | 0.010 | -0.513 | -0.004 | 6.08E-01 | 18549 | -0.044 | -0.079 | -0.008 | 0.018 | -2.427 | -0.018 | 1.52E-02 | 18738 |
| 142 | Thal_MGN_R | 0.001  | -0.020 | 0.021  | 0.011 | 0.048  | 0.000  | 9.62E-01 | 18549 | -0.062 | -0.101 | -0.023 | 0.020 | -3.150 | -0.023 | 1.63E-03 | 18738 |
| 143 | Thal_PuA_L | 0.000  | -0.023 | 0.023  | 0.012 | -0.004 | 0.000  | 9.97E-01 | 18549 | -0.060 | -0.102 | -0.018 | 0.021 | -2.799 | -0.020 | 5.14E-03 | 18738 |
| 144 | Thal_PuA_R | 0.006  | -0.042 | 0.053  | 0.024 | 0.235  | 0.002  | 8.15E-01 | 18549 | -0.128 | -0.215 | -0.040 | 0.044 | -2.867 | -0.021 | 4.15E-03 | 18738 |
| 145 | Thal_PuM_L | 0.001  | -0.451 | 0.453  | 0.231 | 0.003  | 0.000  | 9.98E-01 | 18549 | -1.216 | -2.049 | -0.383 | 0.425 | -2.860 | -0.021 | 4.24E-03 | 18738 |
| 146 | Thal_PuM_R | 0.005  | -0.558 | 0.569  | 0.287 | 0.019  | 0.000  | 9.85E-01 | 18549 | -1.063 | -2.101 | -0.025 | 0.530 | -2.007 | -0.015 | 4.48E-02 | 18738 |
| 147 | Thal_PuL_L | -0.002 | -0.084 | 0.081  | 0.042 | -0.044 | 0.000  | 9.65E-01 | 18549 | -0.224 | -0.376 | -0.072 | 0.078 | -2.892 | -0.021 | 3.83E-03 | 18738 |
| 148 | Thal_PuL_R | -0.008 | -0.140 | 0.123  | 0.067 | -0.126 | -0.001 | 8.99E-01 | 18549 | -0.270 | -0.512 | -0.028 | 0.123 | -2.188 | -0.016 | 2.87E-02 | 18738 |
| 149 | Thal_PuL_L | 0.010  | -0.013 | 0.032  | 0.011 | 0.832  | 0.006  | 4.05E-01 | 18549 | -0.024 | -0.065 | 0.018  | 0.021 | -1.129 | -0.008 | 2.59E-01 | 18738 |
| 150 | Thal_PuL_R | 0.011  | -0.019 | 0.041  | 0.015 | 0.716  | 0.005  | 4.74E-01 | 18549 | -0.029 | -0.084 | 0.026  | 0.028 | -1.046 | -0.008 | 2.96E-01 | 18738 |
| 151 | ACC_sub_L  | -0.446 | -0.705 | -0.187 | 0.132 | -3.379 | -0.025 | 7.30E-04 | 18549 | -0.463 | -0.940 | 0.014  | 0.243 | -1.902 | -0.014 | 5.72E-02 | 18738 |
| 152 | ACC_sub_R  | -0.306 | -0.548 | -0.064 | 0.123 | -2.480 | -0.018 | 1.31E-02 | 18549 | -0.677 | -1.123 | -0.231 | 0.227 | -2.978 | -0.022 | 2.90E-03 | 18738 |
| 153 | ACC_pre_L  | -1.371 | -2.034 | -0.707 | 0.339 | -4.048 | -0.030 | 5.18E-05 | 18549 | -1.808 | -3.030 | -0.585 | 0.624 | -2.898 | -0.021 | 3.76E-03 | 18738 |
| 154 | ACC_pre_R  | -1.090 | -1.730 | -0.451 | 0.326 | -3.343 | -0.025 | 8.32E-04 | 18549 | -2.160 | -3.337 | -0.982 | 0.601 | -3.595 | -0.026 | 3.25E-04 | 18738 |
| 155 | ACC_sup_L  | -1.344 | -2.066 | -0.623 | 0.368 | -3.653 | -0.027 | 2.60E-04 | 18549 | -2.549 | -3.877 | -1.220 | 0.678 | -3.760 | -0.027 | 1.70E-04 | 18738 |
| 156 | ACC_sup_R  | -1.308 | -2.055 | -0.561 | 0.381 | -3.431 | -0.025 | 6.03E-04 | 18549 | -3.036 | -4.412 | -1.660 | 0.702 | -4.325 | -0.032 | 1.54E-05 | 18738 |
| 157 | N_Acc_L    | -0.149 | -0.367 | 0.068  | 0.111 | -1.349 | -0.010 | 1.77E-01 | 18549 | -0.338 | -0.738 | 0.062  | 0.204 | -1.654 | -0.012 | 9.81E-02 | 18738 |
| 158 | N_Acc_R    | -0.080 | -0.268 | 0.108  | 0.096 | -0.834 | -0.006 | 4.04E-01 | 18549 | -0.268 | -0.614 | 0.078  | 0.176 | -1.519 | -0.011 | 1.29E-01 | 18738 |
| 159 | VTA_L      | 0.000  | -0.007 | 0.008  | 0.004 | 0.053  | 0.000  | 9.58E-01 | 18549 | -0.014 | -0.028 | 0.000  | 0.007 | -1.921 | -0.014 | 5.48E-02 | 18738 |
| 160 | VTA_R      | 0.001  | -0.006 | 0.008  | 0.004 | 0.256  | 0.002  | 7.98E-01 | 18549 | -0.014 | -0.027 | -0.001 | 0.006 | -2.159 | -0.016 | 3.09E-02 | 18738 |
| 161 | SN_pc_L    | 0.001  | -0.011 | 0.013  | 0.006 | 0.191  | 0.001  | 8.49E-01 | 18549 | -0.022 | -0.044 | 0.001  | 0.012 | -1.887 | -0.014 | 5.91E-02 | 18738 |
| 162 | SN_pc_R    | -0.005 | -0.021 | 0.011  | 0.008 | -0.619 | -0.005 | 5.36E-01 | 18549 | -0.032 | -0.061 | -0.002 | 0.015 | -2.101 | -0.015 | 3.57E-02 | 18738 |
| 163 | SN_pr_L    | -0.005 | -0.022 | 0.012  | 0.009 | -0.573 | -0.004 | 5.67E-01 | 18549 | -0.039 | -0.070 | -0.008 | 0.016 | -2.490 | -0.018 | 1.28E-02 | 18738 |
| 164 | SN_pr_R    | -0.009 | -0.027 | 0.010  | 0.010 | -0.903 | -0.007 | 3.66E-01 | 18549 | -0.027 | -0.061 | 0.008  | 0.018 | -1.531 | -0.011 | 1.26E-01 | 18738 |



|     |         |        |        |       |       |        |        |          |       |        |        |        |       |        |        |          |       |
|-----|---------|--------|--------|-------|-------|--------|--------|----------|-------|--------|--------|--------|-------|--------|--------|----------|-------|
| 165 | Red_N_L | 0.000  | -0.021 | 0.020 | 0.011 | -0.039 | 0.000  | 9.69E-01 | 18549 | -0.067 | -0.105 | -0.030 | 0.019 | -3.490 | -0.025 | 4.85E-04 | 18738 |
| 166 | Red_N_R | -0.002 | -0.024 | 0.021 | 0.011 | -0.147 | -0.001 | 8.83E-01 | 18549 | -0.056 | -0.098 | -0.015 | 0.021 | -2.681 | -0.020 | 7.36E-03 | 18738 |
| 167 | LC_L    | 0.001  | -0.007 | 0.008 | 0.004 | 0.179  | 0.001  | 8.58E-01 | 18549 | 0.008  | -0.006 | 0.022  | 0.007 | 1.112  | 0.008  | 2.66E-01 | 18738 |
| 168 | LC_R    | -0.001 | -0.010 | 0.007 | 0.004 | -0.267 | -0.002 | 7.90E-01 | 18549 | 0.012  | -0.004 | 0.027  | 0.008 | 1.505  | 0.011  | 1.32E-01 | 18738 |
| 169 | Raphe_D | -0.006 | -0.036 | 0.024 | 0.015 | -0.400 | -0.003 | 6.89E-01 | 18549 | -0.068 | -0.123 | -0.013 | 0.028 | -2.438 | -0.018 | 1.48E-02 | 18738 |
| 170 | Raphe_M | -0.003 | -0.012 | 0.006 | 0.005 | -0.638 | -0.005 | 5.23E-01 | 18549 | -0.006 | -0.022 | 0.011  | 0.009 | -0.675 | -0.005 | 5.00E-01 | 18738 |

|        |                      | Fresh fruit intake |         |         |        |        |        |          |       | Beef intake |          |          |        |        |        |          |       |
|--------|----------------------|--------------------|---------|---------|--------|--------|--------|----------|-------|-------------|----------|----------|--------|--------|--------|----------|-------|
| Number | AAL 3 region         | beta               | 95%CI_l | 95%CI_h | se     | t      | r      | p        | df.e  | beta        | 95%CI_l  | 95%CI_h  | se     | t      | r      | p        | df.e  |
| 0      | Total brain          | 139.732            | 44.360  | 235.105 | 48.657 | 2.872  | 0.021  | 4.09E-03 | 18641 | -419.674    | -584.949 | -254.399 | 84.320 | -4.977 | -0.036 | 6.51E-07 | 18719 |
| 1      | Precentral_L         | -3.823             | -7.180  | -0.465  | 1.713  | -2.231 | -0.016 | 2.57E-02 | 18641 | -8.725      | -14.547  | -2.903   | 2.970  | -2.938 | -0.021 | 3.31E-03 | 18719 |
| 2      | Precentral_R         | 1.443              | -1.636  | 4.522   | 1.571  | 0.919  | 0.007  | 3.58E-01 | 18641 | -7.983      | -13.318  | -2.648   | 2.722  | -2.933 | -0.021 | 3.36E-03 | 18719 |
| 3      | Frontal_Sup_2_L      | -0.038             | -3.583  | 3.507   | 1.809  | -0.021 | 0.000  | 9.83E-01 | 18641 | -8.582      | -14.730  | -2.435   | 3.136  | -2.736 | -0.020 | 6.22E-03 | 18719 |
| 4      | Frontal_Sup_2_R      | -0.413             | -4.321  | 3.496   | 1.994  | -0.207 | -0.002 | 8.36E-01 | 18641 | -11.283     | -18.058  | -4.509   | 3.456  | -3.265 | -0.024 | 1.10E-03 | 18719 |
| 5      | Frontal_Mid_2_L      | -2.022             | -5.746  | 1.702   | 1.900  | -1.064 | -0.008 | 2.87E-01 | 18641 | -10.304     | -16.756  | -3.852   | 3.292  | -3.130 | -0.023 | 1.75E-03 | 18719 |
| 6      | Frontal_Mid_2_R      | 1.174              | -3.037  | 5.386   | 2.149  | 0.546  | 0.004  | 5.85E-01 | 18641 | -17.523     | -24.823  | -10.223  | 3.724  | -4.705 | -0.034 | 2.56E-06 | 18719 |
| 7      | Frontal_Inf_Oper_L   | -0.230             | -1.330  | 0.870   | 0.561  | -0.409 | -0.003 | 6.82E-01 | 18641 | -3.074      | -4.981   | -1.166   | 0.973  | -3.158 | -0.023 | 1.59E-03 | 18719 |
| 8      | Frontal_Inf_Oper_R   | 0.152              | -1.227  | 1.530   | 0.703  | 0.216  | 0.002  | 8.29E-01 | 18641 | -3.424      | -5.815   | -1.033   | 1.220  | -2.807 | -0.021 | 5.01E-03 | 18719 |
| 9      | Frontal_Inf_Tri_L    | -0.592             | -2.929  | 1.744   | 1.192  | -0.497 | -0.004 | 6.19E-01 | 18641 | -7.582      | -11.632  | -3.532   | 2.066  | -3.670 | -0.027 | 2.44E-04 | 18719 |
| 10     | Frontal_Inf_Tri_R    | -0.483             | -2.318  | 1.352   | 0.936  | -0.516 | -0.004 | 6.06E-01 | 18641 | -5.903      | -9.083   | -2.723   | 1.622  | -3.639 | -0.027 | 2.75E-04 | 18719 |
| 11     | Frontal_Inf_Orb_2_L  | -0.298             | -0.996  | 0.400   | 0.356  | -0.838 | -0.006 | 4.02E-01 | 18641 | -1.110      | -2.321   | 0.101    | 0.618  | -1.797 | -0.013 | 7.24E-02 | 18719 |
| 12     | Frontal_Inf_Orb_2_R  | 0.215              | -0.515  | 0.945   | 0.373  | 0.577  | 0.004  | 5.64E-01 | 18641 | -2.040      | -3.306   | -0.774   | 0.646  | -3.158 | -0.023 | 1.59E-03 | 18719 |
| 13     | Rolandic_Oper_L      | 0.379              | -0.678  | 1.435   | 0.539  | 0.702  | 0.005  | 4.83E-01 | 18641 | -2.454      | -4.286   | -0.622   | 0.935  | -2.625 | -0.019 | 8.67E-03 | 18719 |
| 14     | Rolandic_Oper_R      | 1.690              | 0.179   | 3.202   | 0.771  | 2.192  | 0.016  | 2.84E-02 | 18641 | -3.417      | -6.038   | -0.795   | 1.337  | -2.555 | -0.019 | 1.06E-02 | 18719 |
| 15     | Supp_Motor_Area_L    | 2.194              | -0.319  | 4.707   | 1.282  | 1.711  | 0.013  | 8.71E-02 | 18641 | -5.935      | -10.289  | -1.580   | 2.221  | -2.672 | -0.020 | 7.56E-03 | 18719 |
| 16     | Supp_Motor_Area_R    | 2.159              | -0.618  | 4.935   | 1.417  | 1.524  | 0.011  | 1.27E-01 | 18641 | -7.490      | -12.301  | -2.678   | 2.455  | -3.051 | -0.022 | 2.28E-03 | 18719 |
| 17     | Olfactory_L          | 0.469              | 0.096   | 0.842   | 0.190  | 2.465  | 0.018  | 1.37E-02 | 18641 | -0.256      | -0.903   | 0.391    | 0.330  | -0.776 | -0.006 | 4.38E-01 | 18719 |
| 18     | Olfactory_R          | 0.334              | -0.040  | 0.709   | 0.191  | 1.752  | 0.013  | 7.99E-02 | 18641 | -0.519      | -1.168   | 0.130    | 0.331  | -1.568 | -0.011 | 1.17E-01 | 18719 |
| 19     | Frontal_Sup_Medial_L | 3.526              | 1.173   | 5.880   | 1.201  | 2.937  | 0.022  | 3.32E-03 | 18641 | -10.375     | -14.453  | -6.296   | 2.081  | -4.986 | -0.036 | 6.22E-07 | 18719 |
| 20     | Frontal_Sup_Medial_R | 1.339              | -0.374  | 3.052   | 0.874  | 1.532  | 0.011  | 1.25E-01 | 18641 | -6.470      | -9.439   | -3.501   | 1.515  | -4.272 | -0.031 | 1.95E-05 | 18719 |
| 21     | Frontal_Med_Orb_L    | 1.019              | 0.140   | 1.899   | 0.449  | 2.272  | 0.017  | 2.31E-02 | 18641 | -3.098      | -4.623   | -1.574   | 0.778  | -3.984 | -0.029 | 6.79E-05 | 18719 |
| 22     | Frontal_Med_Orb_R    | 1.017              | -0.063  | 2.098   | 0.551  | 1.845  | 0.014  | 6.50E-02 | 18641 | -3.251      | -5.125   | -1.378   | 0.956  | -3.401 | -0.025 | 6.72E-04 | 18719 |
| 23     | Rectus_L             | 1.035              | 0.125   | 1.945   | 0.464  | 2.230  | 0.016  | 2.58E-02 | 18641 | -2.540      | -4.117   | -0.962   | 0.805  | -3.156 | -0.023 | 1.60E-03 | 18719 |
| 24     | Rectus_R             | 0.842              | 0.000   | 1.684   | 0.429  | 1.961  | 0.014  | 4.99E-02 | 18641 | -1.583      | -3.043   | -0.124   | 0.745  | -2.127 | -0.016 | 3.35E-02 | 18719 |
| 25     | OFCmed_L             | 0.115              | -0.412  | 0.643   | 0.269  | 0.428  | 0.003  | 6.68E-01 | 18641 | -1.355      | -2.269   | -0.440   | 0.467  | -2.904 | -0.021 | 3.69E-03 | 18719 |
| 26     | OFCmed_R             | -0.130             | -0.745  | 0.485   | 0.314  | -0.414 | -0.003 | 6.79E-01 | 18641 | -1.832      | -2.898   | -0.767   | 0.544  | -3.371 | -0.025 | 7.50E-04 | 18719 |
| 27     | OFCant_L             | 0.009              | -0.601  | 0.619   | 0.311  | 0.029  | 0.000  | 9.77E-01 | 18641 | -0.993      | -2.050   | 0.065    | 0.539  | -1.840 | -0.013 | 6.57E-02 | 18719 |
| 28     | OFCant_R             | -0.327             | -1.133  | 0.478   | 0.411  | -0.796 | -0.006 | 4.26E-01 | 18641 | -3.238      | -4.634   | -1.841   | 0.712  | -4.544 | -0.033 | 5.55E-06 | 18719 |
| 29     | OFCpost_L            | 0.179              | -0.585  | 0.943   | 0.390  | 0.459  | 0.003  | 6.46E-01 | 18641 | -1.227      | -2.551   | 0.097    | 0.676  | -1.816 | -0.013 | 6.94E-02 | 18719 |
| 30     | OFCpost_R            | 0.106              | -0.599  | 0.811   | 0.360  | 0.295  | 0.002  | 7.68E-01 | 18641 | -2.322      | -3.545   | -1.098   | 0.624  | -3.720 | -0.027 | 2.00E-04 | 18719 |
| 31     | OFClat_L             | -0.148             | -0.405  | 0.110   | 0.131  | -1.125 | -0.008 | 2.61E-01 | 18641 | -0.606      | -1.053   | -0.159   | 0.228  | -2.660 | -0.019 | 7.83E-03 | 18719 |
| 32     | OFClat_R             | 0.026              | -0.192  | 0.243   | 0.111  | 0.232  | 0.002  | 8.16E-01 | 18641 | -0.519      | -0.897   | -0.142   | 0.192  | -2.699 | -0.020 | 6.96E-03 | 18719 |
| 33     | Insula_L             | 2.225              | -0.135  | 4.586   | 1.204  | 1.848  | 0.014  | 6.46E-02 | 18641 | -6.349      | -10.444  | -2.255   | 2.089  | -3.040 | -0.022 | 2.37E-03 | 18719 |
| 34     | Insula_R             | 3.090              | 0.790   | 5.390   | 1.174  | 2.633  | 0.019  | 8.47E-03 | 18641 | -6.613      | -10.602  | -2.623   | 2.035  | -3.249 | -0.024 | 1.16E-03 | 18719 |
| 37     | Cingulate_Mid_L      | 3.413              | 1.416   | 5.410   | 1.019  | 3.350  | 0.025  | 8.10E-04 | 18641 | -10.985     | -14.443  | -7.527   | 1.764  | -6.226 | -0.045 | 4.88E-10 | 18719 |
| 38     | Cingulate_Mid_R      | 4.224              | 2.095   | 6.353   | 1.086  | 3.889  | 0.028  | 1.01E-04 | 18641 | -10.766     | -14.453  | -7.078   | 1.881  | -5.723 | -0.042 | 1.06E-08 | 18719 |
| 39     | Cingulate_Post_L     | -0.397             | -1.007  | 0.213   | 0.311  | -1.275 | -0.009 | 2.02E-01 | 18641 | -2.075      | -3.132   | -1.017   | 0.539  | -3.847 | -0.028 | 1.20E-04 | 18719 |
| 40     | Cingulate_Post_R     | -0.241             | -0.580  | 0.097   | 0.173  | -1.397 | -0.010 | 1.62E-01 | 18641 | -0.901      | -1.488   | -0.315   | 0.299  | -3.012 | -0.022 | 2.60E-03 | 18719 |
| 41     | Hippocampus_L        | 1.026              | 0.039   | 2.013   | 0.504  | 2.037  | 0.015  | 4.17E-02 | 18641 | -1.993      | -3.703   | -0.283   | 0.872  | -2.284 | -0.017 | 2.24E-02 | 18719 |

|    |                      |        |        |       |       |        |        |          |       |         |         |        |       |        |        |          |       |
|----|----------------------|--------|--------|-------|-------|--------|--------|----------|-------|---------|---------|--------|-------|--------|--------|----------|-------|
| 42 | Hippocampus_R        | 1.755  | 0.731  | 2.778 | 0.522 | 3.361  | 0.025  | 7.78E-04 | 18641 | -1.842  | -3.615  | -0.069 | 0.905 | -2.036 | -0.015 | 4.18E-02 | 18719 |
| 43 | ParaHippocampal_L    | 1.623  | 0.746  | 2.500 | 0.447 | 3.628  | 0.027  | 2.86E-04 | 18641 | -1.794  | -3.313  | -0.275 | 0.775 | -2.314 | -0.017 | 2.07E-02 | 18719 |
| 44 | ParaHippocampal_R    | 2.267  | 1.161  | 3.374 | 0.565 | 4.017  | 0.029  | 5.93E-05 | 18641 | -2.850  | -4.766  | -0.933 | 0.978 | -2.914 | -0.021 | 3.57E-03 | 18719 |
| 45 | Amygdala_L           | 0.320  | -0.021 | 0.661 | 0.174 | 1.841  | 0.013  | 6.56E-02 | 18641 | 0.125   | -0.466  | 0.715  | 0.301 | 0.414  | 0.003  | 6.79E-01 | 18719 |
| 46 | Amygdala_R           | 0.365  | 0.017  | 0.714 | 0.178 | 2.055  | 0.015  | 3.99E-02 | 18641 | -0.477  | -1.081  | 0.127  | 0.308 | -1.547 | -0.011 | 1.22E-01 | 18719 |
| 47 | Calcarine_L          | -0.371 | -3.625 | 2.883 | 1.660 | -0.223 | -0.002 | 8.23E-01 | 18641 | -1.193  | -6.829  | 4.443  | 2.875 | -0.415 | -0.003 | 6.78E-01 | 18719 |
| 48 | Calcarine_R          | 1.445  | -1.273 | 4.163 | 1.387 | 1.042  | 0.008  | 2.97E-01 | 18641 | -3.581  | -8.291  | 1.128  | 2.403 | -1.490 | -0.011 | 1.36E-01 | 18719 |
| 49 | Cuneus_L             | 0.620  | -1.420 | 2.660 | 1.041 | 0.595  | 0.004  | 5.52E-01 | 18641 | -2.848  | -6.383  | 0.686  | 1.803 | -1.580 | -0.012 | 1.14E-01 | 18719 |
| 50 | Cuneus_R             | 1.088  | -0.472 | 2.649 | 0.796 | 1.368  | 0.010  | 1.71E-01 | 18641 | -4.467  | -7.171  | -1.763 | 1.380 | -3.238 | -0.024 | 1.21E-03 | 18719 |
| 51 | Lingua_L             | 1.607  | -0.350 | 3.563 | 0.998 | 1.610  | 0.012  | 1.07E-01 | 18641 | -2.968  | -6.356  | 0.421  | 1.729 | -1.717 | -0.013 | 8.60E-02 | 18719 |
| 52 | Lingua_R             | 1.075  | -0.976 | 3.126 | 1.046 | 1.028  | 0.008  | 3.04E-01 | 18641 | -3.918  | -7.468  | -0.368 | 1.811 | -2.163 | -0.016 | 3.05E-02 | 18719 |
| 53 | Occipital_Sup_L      | 0.929  | -0.415 | 2.274 | 0.686 | 1.355  | 0.010  | 1.75E-01 | 18641 | -3.649  | -5.978  | -1.320 | 1.188 | -3.071 | -0.022 | 2.13E-03 | 18719 |
| 54 | Occipital_Sup_R      | 0.545  | -0.913 | 2.002 | 0.744 | 0.732  | 0.005  | 4.64E-01 | 18641 | -5.572  | -8.096  | -3.048 | 1.288 | -4.327 | -0.032 | 1.52E-05 | 18719 |
| 55 | Occipital_Mid_L      | -0.458 | -3.608 | 2.692 | 1.607 | -0.285 | -0.002 | 7.76E-01 | 18641 | -8.472  | -13.932 | -3.013 | 2.785 | -3.042 | -0.022 | 2.36E-03 | 18719 |
| 56 | Occipital_Mid_R      | -1.924 | -4.117 | 0.270 | 1.119 | -1.719 | -0.013 | 8.56E-02 | 18641 | -3.647  | -7.445  | 0.152  | 1.938 | -1.882 | -0.014 | 5.99E-02 | 18719 |
| 57 | Occipital_Inf_L      | -0.370 | -1.417 | 0.676 | 0.534 | -0.693 | -0.005 | 4.88E-01 | 18641 | -0.634  | -2.446  | 1.179  | 0.925 | -0.685 | -0.005 | 4.93E-01 | 18719 |
| 58 | Occipital_Inf_R      | -1.006 | -2.216 | 0.203 | 0.617 | -1.631 | -0.012 | 1.03E-01 | 18641 | 1.356   | -0.738  | 3.450  | 1.068 | 1.269  | 0.009  | 2.05E-01 | 18719 |
| 59 | Fusiform_L           | 4.198  | 1.910  | 6.486 | 1.167 | 3.596  | 0.026  | 3.24E-04 | 18641 | -3.664  | -7.630  | 0.303  | 2.024 | -1.810 | -0.013 | 7.03E-02 | 18719 |
| 60 | Fusiform_R           | 6.857  | 4.342  | 9.372 | 1.283 | 5.345  | 0.039  | 9.16E-08 | 18641 | -2.356  | -6.714  | 2.002  | 2.223 | -1.060 | -0.008 | 2.89E-01 | 18719 |
| 61 | Postcentral_L        | 4.607  | 1.162  | 8.052 | 1.758 | 2.621  | 0.019  | 8.78E-03 | 18641 | -15.235 | -21.201 | -9.270 | 3.044 | -5.006 | -0.037 | 5.62E-07 | 18719 |
| 62 | Postcentral_R        | 6.366  | 2.835  | 9.897 | 1.801 | 3.534  | 0.026  | 4.10E-04 | 18641 | -12.053 | -18.170 | -5.936 | 3.121 | -3.862 | -0.028 | 1.13E-04 | 18719 |
| 63 | Parietal_Sup_L       | 0.871  | -1.113 | 2.856 | 1.012 | 0.861  | 0.006  | 3.89E-01 | 18641 | -3.306  | -6.745  | 0.132  | 1.754 | -1.885 | -0.014 | 5.95E-02 | 18719 |
| 64 | Parietal_Sup_R       | 0.864  | -0.897 | 2.626 | 0.898 | 0.962  | 0.007  | 3.36E-01 | 18641 | -5.024  | -8.074  | -1.974 | 1.556 | -3.229 | -0.024 | 1.25E-03 | 18719 |
| 65 | Parietal_Inf_L       | 3.636  | 1.037  | 6.235 | 1.326 | 2.742  | 0.020  | 6.12E-03 | 18641 | -10.661 | -15.162 | -6.161 | 2.296 | -4.644 | -0.034 | 3.45E-06 | 18719 |
| 66 | Parietal_Inf_R       | 1.631  | -0.053 | 3.314 | 0.859 | 1.898  | 0.014  | 5.76E-02 | 18641 | -4.385  | -7.300  | -1.469 | 1.487 | -2.948 | -0.022 | 3.20E-03 | 18719 |
| 67 | SupraMarginal_L      | 0.831  | -0.692 | 2.355 | 0.777 | 1.070  | 0.008  | 2.85E-01 | 18641 | -4.785  | -7.422  | -2.147 | 1.346 | -3.556 | -0.026 | 3.78E-04 | 18719 |
| 68 | SupraMarginal_R      | 2.836  | 0.681  | 4.991 | 1.100 | 2.579  | 0.019  | 9.90E-03 | 18641 | -6.710  | -10.442 | -2.978 | 1.904 | -3.524 | -0.026 | 4.26E-04 | 18719 |
| 69 | Angular_L            | 1.270  | -0.226 | 2.767 | 0.764 | 1.664  | 0.012  | 9.62E-02 | 18641 | -4.491  | -7.082  | -1.899 | 1.322 | -3.396 | -0.025 | 6.86E-04 | 18719 |
| 70 | Angular_R            | -0.050 | -2.056 | 1.956 | 1.024 | -0.049 | 0.000  | 9.61E-01 | 18641 | -7.591  | -11.064 | -4.117 | 1.772 | -4.283 | -0.031 | 1.85E-05 | 18719 |
| 71 | Precuneus_L          | 2.728  | -0.917 | 6.373 | 1.860 | 1.467  | 0.011  | 1.42E-01 | 18641 | -10.847 | -17.164 | -4.531 | 3.222 | -3.366 | -0.025 | 7.63E-04 | 18719 |
| 72 | Precuneus_R          | 1.789  | -1.459 | 5.036 | 1.657 | 1.080  | 0.008  | 2.80E-01 | 18641 | -12.415 | -18.040 | -6.790 | 2.870 | -4.326 | -0.032 | 1.52E-05 | 18719 |
| 73 | Paracentral_Lobule_L | 0.436  | -1.234 | 2.105 | 0.852 | 0.512  | 0.004  | 6.09E-01 | 18641 | -2.253  | -5.146  | 0.640  | 1.476 | -1.526 | -0.011 | 1.27E-01 | 18719 |
| 74 | Paracentral_Lobule_R | 1.190  | -0.006 | 2.386 | 0.610 | 1.951  | 0.014  | 5.11E-02 | 18641 | -1.909  | -3.981  | 0.162  | 1.057 | -1.806 | -0.013 | 7.09E-02 | 18719 |
| 75 | Caudate_L            | 0.119  | -1.214 | 1.451 | 0.680 | 0.175  | 0.001  | 8.61E-01 | 18641 | -2.870  | -5.181  | -0.558 | 1.179 | -2.434 | -0.018 | 1.50E-02 | 18719 |
| 76 | Caudate_R            | -0.121 | -1.629 | 1.387 | 0.769 | -0.158 | -0.001 | 8.75E-01 | 18641 | -2.989  | -5.605  | -0.373 | 1.335 | -2.239 | -0.016 | 2.51E-02 | 18719 |
| 77 | Putamen_L            | 0.753  | -1.270 | 2.775 | 1.032 | 0.730  | 0.005  | 4.66E-01 | 18641 | -2.446  | -5.955  | 1.063  | 1.790 | -1.366 | -0.010 | 1.72E-01 | 18719 |
| 78 | Putamen_R            | 1.330  | -0.729 | 3.389 | 1.050 | 1.266  | 0.009  | 2.06E-01 | 18641 | -3.215  | -6.788  | 0.359  | 1.823 | -1.763 | -0.013 | 7.79E-02 | 18719 |
| 79 | Pallidum_L           | 0.079  | -0.101 | 0.259 | 0.092 | 0.861  | 0.006  | 3.89E-01 | 18641 | -0.242  | -0.554  | 0.069  | 0.159 | -1.524 | -0.011 | 1.28E-01 | 18719 |
| 80 | Pallidum_R           | 0.144  | -0.054 | 0.341 | 0.101 | 1.425  | 0.010  | 1.54E-01 | 18641 | -0.301  | -0.643  | 0.042  | 0.175 | -1.722 | -0.013 | 8.50E-02 | 18719 |
| 83 | Heschl_L             | 0.017  | -0.348 | 0.381 | 0.186 | 0.089  | 0.001  | 9.29E-01 | 18641 | -1.097  | -1.730  | -0.465 | 0.323 | -3.399 | -0.025 | 6.77E-04 | 18719 |
| 84 | Heschl_R             | 0.310  | -0.098 | 0.717 | 0.208 | 1.489  | 0.011  | 1.37E-01 | 18641 | -0.900  | -1.607  | -0.194 | 0.361 | -2.497 | -0.018 | 1.25E-02 | 18719 |
| 85 | Temporal_Sup_L       | 1.345  | -1.288 | 3.979 | 1.344 | 1.001  | 0.007  | 3.17E-01 | 18641 | -9.516  | -14.081 | -4.951 | 2.329 | -4.086 | -0.030 | 4.41E-05 | 18719 |
| 86 | Temporal_Sup_R       | 3.759  | 0.844  | 6.673 | 1.487 | 2.528  | 0.019  | 1.15E-02 | 18641 | -10.225 | -15.275 | -5.176 | 2.576 | -3.969 | -0.029 | 7.24E-05 | 18719 |
| 87 | Temporal_Pole_Sup_L  | 0.841  | -0.406 | 2.089 | 0.636 | 1.322  | 0.010  | 1.86E-01 | 18641 | -2.115  | -4.278  | 0.048  | 1.103 | -1.916 | -0.014 | 5.53E-02 | 18719 |
| 88 | Temporal_Pole_Sup_R  | 2.300  | 0.986  | 3.614 | 0.670 | 3.432  | 0.025  | 6.01E-04 | 18641 | -3.489  | -5.766  | -1.212 | 1.161 | -3.004 | -0.022 | 2.67E-03 | 18719 |
| 89 | Temporal_Mid_L       | 4.755  | 0.360  | 9.150 | 2.242 | 2.121  | 0.016  | 3.40E-02 | 18641 | -16.233 | -23.840 | -8.625 | 3.881 | -4.182 | -0.031 | 2.90E-05 | 18719 |
| 90 | Temporal_Mid_R       | 2.245  | -1.658 | 6.148 | 1.991 | 1.128  | 0.008  | 2.59E-01 | 18641 | -10.046 | -16.800 | -3.293 | 3.445 | -2.916 | -0.021 | 3.55E-03 | 18719 |
| 91 | Temporal_Pole_Mid_L  | 0.924  | -0.126 | 1.973 | 0.535 | 1.725  | 0.013  | 8.46E-02 | 18641 | -1.159  | -2.977  | 0.658  | 0.927 | -1.250 | -0.009 | 2.11E-01 | 18719 |

|     |                     |        |        |        |       |        |        |          |       |        |         |        |       |        |        |          |       |
|-----|---------------------|--------|--------|--------|-------|--------|--------|----------|-------|--------|---------|--------|-------|--------|--------|----------|-------|
| 92  | Temporal_Pole_Mid_R | 1.516  | 0.241  | 2.791  | 0.650 | 2.331  | 0.017  | 1.98E-02 | 18641 | -2.724 | -4.932  | -0.515 | 1.127 | -2.417 | -0.018 | 1.57E-02 | 18719 |
| 93  | Temporal_Inf_L      | 1.688  | -1.331 | 4.707  | 1.540 | 1.096  | 0.008  | 2.73E-01 | 18641 | -2.569 | -7.797  | 2.658  | 2.667 | -0.963 | -0.007 | 3.35E-01 | 18719 |
| 94  | Temporal_Inf_R      | 0.968  | -2.325 | 4.261  | 1.680 | 0.576  | 0.004  | 5.64E-01 | 18641 | -5.416 | -11.115 | 0.283  | 2.908 | -1.863 | -0.014 | 6.25E-02 | 18719 |
| 95  | Cerebellum_Crus1_L  | 3.628  | 0.043  | 7.213  | 1.829 | 1.984  | 0.015  | 4.73E-02 | 18641 | 2.062  | -4.150  | 8.274  | 3.169 | 0.651  | 0.005  | 5.15E-01 | 18719 |
| 96  | Cerebellum_Crus1_R  | 4.581  | 0.924  | 8.239  | 1.866 | 2.455  | 0.018  | 1.41E-02 | 18641 | 3.317  | -3.018  | 9.652  | 3.232 | 1.026  | 0.008  | 3.05E-01 | 18719 |
| 97  | Cerebellum_Crus2_L  | 2.931  | 0.087  | 5.775  | 1.451 | 2.020  | 0.015  | 4.34E-02 | 18641 | -3.115 | -8.042  | 1.812  | 2.514 | -1.239 | -0.009 | 2.15E-01 | 18719 |
| 98  | Cerebellum_Crus2_R  | 2.476  | -0.155 | 5.107  | 1.342 | 1.845  | 0.014  | 6.51E-02 | 18641 | -0.276 | -4.833  | 4.282  | 2.325 | -0.119 | -0.001 | 9.06E-01 | 18719 |
| 99  | Cerebellum_3_L      | 0.310  | 0.120  | 0.501  | 0.097 | 3.187  | 0.023  | 1.44E-03 | 18641 | 0.221  | -0.110  | 0.552  | 0.169 | 1.309  | 0.010  | 1.91E-01 | 18719 |
| 100 | Cerebellum_3_R      | 0.477  | 0.220  | 0.735  | 0.131 | 3.631  | 0.027  | 2.83E-04 | 18641 | 0.311  | -0.135  | 0.758  | 0.228 | 1.367  | 0.010  | 1.72E-01 | 18719 |
| 101 | Cerebellum_4_5_L    | 1.894  | 0.350  | 3.438  | 0.788 | 2.404  | 0.018  | 1.62E-02 | 18641 | 1.620  | -1.056  | 4.295  | 1.365 | 1.186  | 0.009  | 2.35E-01 | 18719 |
| 102 | Cerebellum_4_5_R    | 2.215  | 0.956  | 3.473  | 0.642 | 3.450  | 0.025  | 5.62E-04 | 18641 | 0.536  | -1.644  | 2.716  | 1.112 | 0.482  | 0.004  | 6.30E-01 | 18719 |
| 103 | Cerebellum_6_L      | 3.420  | 0.752  | 6.088  | 1.361 | 2.513  | 0.018  | 1.20E-02 | 18641 | 2.726  | -1.898  | 7.349  | 2.359 | 1.155  | 0.008  | 2.48E-01 | 18719 |
| 104 | Cerebellum_6_R      | 4.080  | 1.269  | 6.892  | 1.434 | 2.845  | 0.021  | 4.45E-03 | 18641 | 4.218  | -0.653  | 9.090  | 2.485 | 1.697  | 0.012  | 8.96E-02 | 18719 |
| 105 | Cerebellum_7b_L     | 1.093  | 0.224  | 1.963  | 0.444 | 2.465  | 0.018  | 1.37E-02 | 18641 | -0.463 | -1.969  | 1.042  | 0.768 | -0.603 | -0.004 | 5.46E-01 | 18719 |
| 106 | Cerebellum_7b_R     | 1.164  | 0.302  | 2.025  | 0.440 | 2.647  | 0.019  | 8.14E-03 | 18641 | -0.668 | -2.160  | 0.825  | 0.761 | -0.877 | -0.006 | 3.81E-01 | 18719 |
| 107 | Cerebellum_8_L      | 3.271  | 0.511  | 6.031  | 1.408 | 2.323  | 0.017  | 2.02E-02 | 18641 | 4.525  | -0.257  | 9.306  | 2.440 | 1.855  | 0.014  | 6.37E-02 | 18719 |
| 108 | Cerebellum_8_R      | 4.644  | 1.053  | 8.235  | 1.832 | 2.535  | 0.019  | 1.13E-02 | 18641 | -0.846 | -7.070  | 5.378  | 3.175 | -0.266 | -0.002 | 7.90E-01 | 18719 |
| 109 | Cerebellum_9_L      | 0.445  | -1.115 | 2.005  | 0.796 | 0.560  | 0.004  | 5.76E-01 | 18641 | 3.799  | 1.095   | 6.504  | 1.380 | 2.754  | 0.020  | 5.90E-03 | 18719 |
| 110 | Cerebellum_9_R      | -0.110 | -1.643 | 1.424  | 0.783 | -0.140 | -0.001 | 8.89E-01 | 18641 | 3.470  | 0.811   | 6.128  | 1.356 | 2.558  | 0.019  | 1.05E-02 | 18719 |
| 111 | Cerebellum_10_L     | -0.091 | -0.201 | 0.020  | 0.057 | -1.602 | -0.012 | 1.09E-01 | 18641 | 0.386  | 0.195   | 0.578  | 0.098 | 3.947  | 0.029  | 7.94E-05 | 18719 |
| 112 | Cerebellum_10_R     | -0.092 | -0.207 | 0.023  | 0.059 | -1.570 | -0.011 | 1.17E-01 | 18641 | 0.227  | 0.027   | 0.426  | 0.102 | 2.226  | 0.016  | 2.60E-02 | 18719 |
| 113 | Vermis_1_2          | 0.122  | 0.050  | 0.194  | 0.037 | 3.312  | 0.024  | 9.28E-04 | 18641 | 0.036  | -0.089  | 0.160  | 0.064 | 0.558  | 0.004  | 5.77E-01 | 18719 |
| 114 | Vermis_3            | 0.471  | 0.185  | 0.757  | 0.146 | 3.227  | 0.024  | 1.25E-03 | 18641 | 0.011  | -0.485  | 0.507  | 0.253 | 0.043  | 0.000  | 9.65E-01 | 18719 |
| 115 | Vermis_4_5          | 0.776  | -0.065 | 1.618  | 0.429 | 1.809  | 0.013  | 7.04E-02 | 18641 | 0.393  | -1.064  | 1.851  | 0.744 | 0.529  | 0.004  | 5.97E-01 | 18719 |
| 116 | Vermis_6            | 0.477  | 0.009  | 0.945  | 0.239 | 1.996  | 0.015  | 4.59E-02 | 18641 | 1.174  | 0.363   | 1.986  | 0.414 | 2.837  | 0.021  | 4.55E-03 | 18719 |
| 117 | Vermis_7            | 0.217  | -0.047 | 0.482  | 0.135 | 1.611  | 0.012  | 1.07E-01 | 18641 | 0.622  | 0.163   | 1.080  | 0.234 | 2.659  | 0.019  | 7.85E-03 | 18719 |
| 118 | Vermis_8            | 0.096  | -0.339 | 0.530  | 0.222 | 0.431  | 0.003  | 6.66E-01 | 18641 | 0.924  | 0.171   | 1.678  | 0.385 | 2.404  | 0.018  | 1.62E-02 | 18719 |
| 119 | Vermis_9            | 0.227  | -0.125 | 0.580  | 0.180 | 1.263  | 0.009  | 2.06E-01 | 18641 | 0.796  | 0.185   | 1.407  | 0.312 | 2.553  | 0.019  | 1.07E-02 | 18719 |
| 120 | Vermis_10           | 0.075  | -0.024 | 0.173  | 0.050 | 1.487  | 0.011  | 1.37E-01 | 18641 | 0.270  | 0.099   | 0.440  | 0.087 | 3.104  | 0.023  | 1.91E-03 | 18719 |
| 121 | Thal_AV_L           | -0.018 | -0.058 | 0.021  | 0.020 | -0.905 | -0.007 | 3.65E-01 | 18641 | -0.117 | -0.185  | -0.049 | 0.035 | -3.365 | -0.025 | 7.67E-04 | 18719 |
| 122 | Thal_AV_R           | 0.001  | -0.056 | 0.057  | 0.029 | 0.024  | 0.000  | 9.81E-01 | 18641 | -0.187 | -0.284  | -0.089 | 0.050 | -3.753 | -0.027 | 1.75E-04 | 18719 |
| 123 | Thal_LP_L           | -0.003 | -0.047 | 0.040  | 0.022 | -0.157 | -0.001 | 8.75E-01 | 18641 | -0.183 | -0.259  | -0.107 | 0.039 | -4.742 | -0.035 | 2.14E-06 | 18719 |
| 124 | Thal_LP_R           | -0.008 | -0.065 | 0.049  | 0.029 | -0.273 | -0.002 | 7.85E-01 | 18641 | -0.280 | -0.379  | -0.182 | 0.050 | -5.580 | -0.041 | 2.44E-08 | 18719 |
| 125 | Thal_VA_L           | -0.034 | -0.080 | 0.013  | 0.024 | -1.427 | -0.010 | 1.53E-01 | 18641 | -0.036 | -0.117  | 0.045  | 0.041 | -0.872 | -0.006 | 3.83E-01 | 18719 |
| 126 | Thal_VA_R           | -0.015 | -0.073 | 0.042  | 0.029 | -0.529 | -0.004 | 5.96E-01 | 18641 | -0.062 | -0.161  | 0.037  | 0.051 | -1.220 | -0.009 | 2.22E-01 | 18719 |
| 127 | Thal_VL_L           | -0.116 | -0.248 | 0.017  | 0.068 | -1.715 | -0.013 | 8.63E-02 | 18641 | -0.386 | -0.616  | -0.157 | 0.117 | -3.301 | -0.024 | 9.66E-04 | 18719 |
| 128 | Thal_VL_R           | -0.097 | -0.273 | 0.079  | 0.090 | -1.078 | -0.008 | 2.81E-01 | 18641 | -0.754 | -1.059  | -0.449 | 0.156 | -4.850 | -0.035 | 1.25E-06 | 18719 |
| 129 | Thal_VPL_L          | -0.165 | -0.323 | -0.007 | 0.080 | -2.052 | -0.015 | 4.01E-02 | 18641 | -0.434 | -0.708  | -0.161 | 0.139 | -3.115 | -0.023 | 1.84E-03 | 18719 |
| 130 | Thal_VPL_R          | -0.121 | -0.287 | 0.045  | 0.085 | -1.429 | -0.010 | 1.53E-01 | 18641 | -0.546 | -0.833  | -0.259 | 0.147 | -3.725 | -0.027 | 1.96E-04 | 18719 |
| 131 | Thal_IL_L           | -0.029 | -0.097 | 0.039  | 0.035 | -0.835 | -0.006 | 4.04E-01 | 18641 | -0.330 | -0.448  | -0.211 | 0.060 | -5.468 | -0.040 | 4.62E-08 | 18719 |
| 132 | Thal_IL_R           | 0.006  | -0.072 | 0.083  | 0.039 | 0.145  | 0.001  | 8.85E-01 | 18641 | -0.348 | -0.482  | -0.214 | 0.068 | -5.084 | -0.037 | 3.74E-07 | 18719 |
| 133 | Thal_Re_L           | 0.000  | 0.000  | 0.000  | 0.000 | 0.534  | 0.004  | 5.93E-01 | 18641 | 0.000  | -0.001  | 0.000  | 0.000 | -1.687 | -0.012 | 9.17E-02 | 18719 |
| 134 | Thal_Re_R           | 0.001  | -0.001 | 0.004  | 0.001 | 1.059  | 0.008  | 2.90E-01 | 18641 | -0.006 | -0.010  | -0.002 | 0.002 | -2.798 | -0.020 | 5.14E-03 | 18719 |
| 135 | Thal_MDm_L          | -0.128 | -0.634 | 0.377  | 0.258 | -0.498 | -0.004 | 6.18E-01 | 18641 | -2.505 | -3.380  | -1.629 | 0.447 | -5.608 | -0.041 | 2.07E-08 | 18719 |
| 136 | Thal_MDm_R          | 0.067  | -0.520 | 0.655  | 0.300 | 0.224  | 0.002  | 8.23E-01 | 18641 | -2.564 | -3.581  | -1.546 | 0.519 | -4.939 | -0.036 | 7.93E-07 | 18719 |
| 137 | Thal_MDl_L          | -0.025 | -0.112 | 0.063  | 0.045 | -0.552 | -0.004 | 5.81E-01 | 18641 | -0.466 | -0.618  | -0.315 | 0.077 | -6.032 | -0.044 | 1.65E-09 | 18719 |
| 138 | Thal_MDl_R          | 0.012  | -0.088 | 0.111  | 0.051 | 0.229  | 0.002  | 8.19E-01 | 18641 | -0.490 | -0.662  | -0.318 | 0.088 | -5.577 | -0.041 | 2.48E-08 | 18719 |
| 139 | Thal_LGN_L          | 0.012  | -0.002 | 0.025  | 0.007 | 1.704  | 0.012  | 8.85E-02 | 18641 | -0.048 | -0.071  | -0.025 | 0.012 | -4.079 | -0.030 | 4.55E-05 | 18719 |

|     |            |        |        |       |       |        |        |          |       |        |        |        |       |        |        |          |       |
|-----|------------|--------|--------|-------|-------|--------|--------|----------|-------|--------|--------|--------|-------|--------|--------|----------|-------|
| 140 | Thal_LGN_R | 0.002  | -0.027 | 0.030 | 0.014 | 0.121  | 0.001  | 9.04E-01 | 18641 | -0.143 | -0.192 | -0.094 | 0.025 | -5.720 | -0.042 | 1.08E-08 | 18719 |
| 141 | Thal_MGN_L | 0.001  | -0.023 | 0.024 | 0.012 | 0.065  | 0.000  | 9.48E-01 | 18641 | -0.095 | -0.136 | -0.054 | 0.021 | -4.520 | -0.033 | 6.23E-06 | 18719 |
| 142 | Thal_MGN_R | 0.009  | -0.017 | 0.035 | 0.013 | 0.673  | 0.005  | 5.01E-01 | 18641 | -0.104 | -0.149 | -0.059 | 0.023 | -4.572 | -0.033 | 4.87E-06 | 18719 |
| 143 | Thal_PuA_L | 0.002  | -0.026 | 0.030 | 0.014 | 0.160  | 0.001  | 8.73E-01 | 18641 | -0.127 | -0.175 | -0.078 | 0.025 | -5.132 | -0.037 | 2.89E-07 | 18719 |
| 144 | Thal_PuA_R | 0.026  | -0.032 | 0.084 | 0.030 | 0.870  | 0.006  | 3.84E-01 | 18641 | -0.233 | -0.334 | -0.132 | 0.051 | -4.533 | -0.033 | 5.85E-06 | 18719 |
| 145 | Thal_PuM_L | -0.116 | -0.673 | 0.440 | 0.284 | -0.409 | -0.003 | 6.82E-01 | 18641 | -2.618 | -3.581 | -1.654 | 0.492 | -5.324 | -0.039 | 1.03E-07 | 18719 |
| 146 | Thal_PuM_R | 0.037  | -0.656 | 0.730 | 0.354 | 0.104  | 0.001  | 9.17E-01 | 18641 | -2.776 | -3.977 | -1.575 | 0.613 | -4.530 | -0.033 | 5.94E-06 | 18719 |
| 147 | Thal_PuL_L | -0.035 | -0.136 | 0.067 | 0.052 | -0.675 | -0.005 | 5.00E-01 | 18641 | -0.489 | -0.665 | -0.314 | 0.090 | -5.457 | -0.040 | 4.90E-08 | 18719 |
| 148 | Thal_PuL_R | -0.013 | -0.174 | 0.149 | 0.082 | -0.153 | -0.001 | 8.78E-01 | 18641 | -0.675 | -0.955 | -0.396 | 0.143 | -4.733 | -0.035 | 2.23E-06 | 18719 |
| 149 | Thal_PuL_L | -0.019 | -0.046 | 0.009 | 0.014 | -1.341 | -0.010 | 1.80E-01 | 18641 | -0.074 | -0.121 | -0.026 | 0.024 | -3.012 | -0.022 | 2.60E-03 | 18719 |
| 150 | Thal_PuL_R | -0.023 | -0.060 | 0.013 | 0.019 | -1.248 | -0.009 | 2.12E-01 | 18641 | -0.112 | -0.175 | -0.049 | 0.032 | -3.465 | -0.025 | 5.32E-04 | 18719 |
| 151 | ACC_sub_L  | 0.132  | -0.186 | 0.450 | 0.162 | 0.814  | 0.006  | 4.16E-01 | 18641 | -0.195 | -0.747 | 0.356  | 0.281 | -0.694 | -0.005 | 4.88E-01 | 18719 |
| 152 | ACC_sub_R  | 0.041  | -0.256 | 0.339 | 0.152 | 0.273  | 0.002  | 7.85E-01 | 18641 | -0.121 | -0.637 | 0.394  | 0.263 | -0.461 | -0.003 | 6.45E-01 | 18719 |
| 153 | ACC_pre_L  | 1.128  | 0.312  | 1.943 | 0.416 | 2.710  | 0.020  | 6.73E-03 | 18641 | -2.289 | -3.704 | -0.875 | 0.721 | -3.173 | -0.023 | 1.51E-03 | 18719 |
| 154 | ACC_pre_R  | 1.113  | 0.327  | 1.899 | 0.401 | 2.776  | 0.020  | 5.50E-03 | 18641 | -1.919 | -3.281 | -0.557 | 0.695 | -2.761 | -0.020 | 5.76E-03 | 18719 |
| 155 | ACC_sup_L  | 0.734  | -0.152 | 1.621 | 0.452 | 1.623  | 0.012  | 1.05E-01 | 18641 | -2.532 | -4.069 | -0.995 | 0.784 | -3.229 | -0.024 | 1.24E-03 | 18719 |
| 156 | ACC_sup_R  | 1.117  | 0.199  | 2.036 | 0.469 | 2.385  | 0.017  | 1.71E-02 | 18641 | -2.237 | -3.829 | -0.645 | 0.812 | -2.754 | -0.020 | 5.89E-03 | 18719 |
| 157 | N_Acc_L    | 0.279  | 0.012  | 0.545 | 0.136 | 2.048  | 0.015  | 4.06E-02 | 18641 | -0.340 | -0.803 | 0.122  | 0.236 | -1.443 | -0.011 | 1.49E-01 | 18719 |
| 158 | N_Acc_R    | 0.153  | -0.077 | 0.384 | 0.118 | 1.303  | 0.010  | 1.93E-01 | 18641 | -0.318 | -0.718 | 0.082  | 0.204 | -1.556 | -0.011 | 1.20E-01 | 18719 |
| 159 | VTA_L      | 0.008  | -0.001 | 0.018 | 0.005 | 1.743  | 0.013  | 8.14E-02 | 18641 | -0.010 | -0.026 | 0.007  | 0.008 | -1.148 | -0.008 | 2.51E-01 | 18719 |
| 160 | VTA_R      | 0.010  | 0.002  | 0.019 | 0.004 | 2.323  | 0.017  | 2.02E-02 | 18641 | -0.016 | -0.031 | -0.002 | 0.007 | -2.187 | -0.016 | 2.87E-02 | 18719 |
| 161 | SN_pc_L    | 0.019  | 0.003  | 0.034 | 0.008 | 2.408  | 0.018  | 1.60E-02 | 18641 | -0.033 | -0.060 | -0.007 | 0.013 | -2.511 | -0.018 | 1.20E-02 | 18719 |
| 162 | SN_pc_R    | 0.024  | 0.004  | 0.043 | 0.010 | 2.336  | 0.017  | 1.95E-02 | 18641 | -0.049 | -0.083 | -0.014 | 0.018 | -2.773 | -0.020 | 5.57E-03 | 18719 |
| 163 | SN_pr_L    | 0.006  | -0.015 | 0.026 | 0.010 | 0.554  | 0.004  | 5.80E-01 | 18641 | -0.036 | -0.071 | -0.001 | 0.018 | -1.988 | -0.015 | 4.69E-02 | 18719 |
| 164 | SN_pr_R    | 0.008  | -0.015 | 0.031 | 0.012 | 0.654  | 0.005  | 5.13E-01 | 18641 | -0.035 | -0.075 | 0.005  | 0.020 | -1.716 | -0.013 | 8.63E-02 | 18719 |
| 165 | Red_N_L    | 0.031  | 0.006  | 0.056 | 0.013 | 2.395  | 0.018  | 1.66E-02 | 18641 | -0.065 | -0.109 | -0.021 | 0.022 | -2.916 | -0.021 | 3.54E-03 | 18719 |
| 166 | Red_N_R    | 0.044  | 0.016  | 0.071 | 0.014 | 3.103  | 0.023  | 1.92E-03 | 18641 | -0.062 | -0.109 | -0.014 | 0.024 | -2.529 | -0.018 | 1.14E-02 | 18719 |
| 167 | LC_L       | 0.012  | 0.003  | 0.022 | 0.005 | 2.533  | 0.019  | 1.13E-02 | 18641 | 0.004  | -0.013 | 0.020  | 0.008 | 0.425  | 0.003  | 6.71E-01 | 18719 |
| 168 | LC_R       | 0.009  | -0.001 | 0.019 | 0.005 | 1.718  | 0.013  | 8.58E-02 | 18641 | 0.001  | -0.017 | 0.019  | 0.009 | 0.115  | 0.001  | 9.09E-01 | 18719 |
| 169 | Raphe_D    | 0.041  | 0.005  | 0.078 | 0.019 | 2.216  | 0.016  | 2.67E-02 | 18641 | -0.138 | -0.202 | -0.075 | 0.032 | -4.276 | -0.031 | 1.91E-05 | 18719 |
| 170 | Raphe_M    | 0.014  | 0.002  | 0.025 | 0.006 | 2.379  | 0.017  | 1.74E-02 | 18641 | -0.009 | -0.028 | 0.010  | 0.010 | -0.904 | -0.007 | 3.66E-01 | 18719 |

| Number | AAL 3 region        | Dried fruit intake |         |         |        |       |       |          |       | Lamb/mutton intake |          |          |         |        |        |          |       |
|--------|---------------------|--------------------|---------|---------|--------|-------|-------|----------|-------|--------------------|----------|----------|---------|--------|--------|----------|-------|
|        |                     | beta               | 95%CI l | 95%CI h | se     | t     | r     | p        | df.e  | beta               | 95%CI l  | 95%CI h  | se      | t      | r      | p        | df.e  |
| 0      | Total brain         | 350.276            | 239.002 | 461.550 | 56.770 | 6.170 | 0.045 | 6.97E-10 | 18518 | -620.066           | -830.228 | -409.904 | 107.221 | -5.783 | -0.042 | 7.45E-09 | 18709 |
| 1      | Precentral_L        | 4.505              | 0.585   | 8.424   | 2.000  | 2.253 | 0.017 | 2.43E-02 | 18518 | -12.945            | -20.349  | -5.541   | 3.777   | -3.427 | -0.025 | 6.12E-04 | 18709 |
| 2      | Precentral_R        | 6.695              | 3.108   | 10.281  | 1.830  | 3.659 | 0.027 | 2.54E-04 | 18518 | -14.863            | -21.645  | -8.082   | 3.460   | -4.296 | -0.031 | 1.75E-05 | 18709 |
| 3      | Frontal_Sup_2_L     | 10.064             | 5.932   | 14.196  | 2.108  | 4.774 | 0.035 | 1.82E-06 | 18518 | -13.057            | -20.872  | -5.243   | 3.987   | -3.275 | -0.024 | 1.06E-03 | 18709 |
| 4      | Frontal_Sup_2_R     | 9.883              | 5.325   | 14.441  | 2.326  | 4.250 | 0.031 | 2.15E-05 | 18518 | -19.080            | -27.690  | -10.469  | 4.393   | -4.343 | -0.032 | 1.41E-05 | 18709 |
| 5      | Frontal_Mid_2_L     | 9.767              | 5.425   | 14.110  | 2.215  | 4.409 | 0.032 | 1.05E-05 | 18518 | -14.133            | -22.340  | -5.927   | 4.187   | -3.376 | -0.025 | 7.38E-04 | 18709 |
| 6      | Frontal_Mid_2_R     | 10.934             | 6.020   | 15.847  | 2.507  | 4.362 | 0.032 | 1.30E-05 | 18518 | -20.010            | -29.296  | -10.724  | 4.737   | -4.224 | -0.031 | 2.41E-05 | 18709 |
| 7      | Frontal_Inf_Oper_L  | 2.732              | 1.449   | 4.015   | 0.655  | 4.173 | 0.031 | 3.02E-05 | 18518 | -3.864             | -6.290   | -1.439   | 1.237   | -3.123 | -0.023 | 1.79E-03 | 18709 |
| 8      | Frontal_Inf_Oper_R  | 2.618              | 1.008   | 4.227   | 0.821  | 3.188 | 0.023 | 1.44E-03 | 18518 | -4.825             | -7.865   | -1.784   | 1.551   | -3.110 | -0.023 | 1.87E-03 | 18709 |
| 9      | Frontal_Inf_Tri_L   | 6.402              | 3.676   | 9.128   | 1.391  | 4.603 | 0.034 | 4.19E-06 | 18518 | -7.824             | -12.975  | -2.673   | 2.628   | -2.977 | -0.022 | 2.91E-03 | 18709 |
| 10     | Frontal_Inf_Tri_R   | 4.173              | 2.032   | 6.315   | 1.092  | 3.820 | 0.028 | 1.34E-04 | 18518 | -6.512             | -10.557  | -2.468   | 2.063   | -3.156 | -0.023 | 1.60E-03 | 18709 |
| 11     | Frontal_Inf_Orb_2_L | 2.576              | 1.761   | 3.391   | 0.416  | 6.194 | 0.045 | 5.98E-10 | 18518 | -0.837             | -2.378   | 0.703    | 0.786   | -1.066 | -0.008 | 2.87E-01 | 18709 |
| 12     | Frontal_Inf_Orb_2_R | 2.519              | 1.666   | 3.371   | 0.435  | 5.792 | 0.043 | 7.08E-09 | 18518 | -3.035             | -4.645   | -1.426   | 0.821   | -3.696 | -0.027 | 2.19E-04 | 18709 |
| 13     | Rolandic_Oper_L     | 1.566              | 0.332   | 2.800   | 0.629  | 2.488 | 0.018 | 1.29E-02 | 18518 | -2.760             | -5.089   | -0.430   | 1.189   | -2.322 | -0.017 | 2.03E-02 | 18709 |
| 14     | Rolandic_Oper_R     | 2.786              | 1.021   | 4.550   | 0.900  | 3.094 | 0.023 | 1.98E-03 | 18518 | -6.406             | -9.739   | -3.073   | 1.700   | -3.767 | -0.028 | 1.66E-04 | 18709 |

|    |                      |        |        |        |       |        |        |          |       |         |         |         |       |        |        |          |       |
|----|----------------------|--------|--------|--------|-------|--------|--------|----------|-------|---------|---------|---------|-------|--------|--------|----------|-------|
| 15 | Supp_Motor_Area_L    | 3.359  | 0.431  | 6.287  | 1.494 | 2.249  | 0.017  | 2.45E-02 | 18518 | -9.605  | -15.139 | -4.071  | 2.823 | -3.402 | -0.025 | 6.71E-04 | 18709 |
| 16 | Supp_Motor_Area_R    | 4.661  | 1.422  | 7.900  | 1.653 | 2.821  | 0.021  | 4.80E-03 | 18518 | -7.793  | -13.911 | -1.675  | 3.121 | -2.497 | -0.018 | 1.25E-02 | 18709 |
| 17 | Olfactory_L          | 0.328  | -0.108 | 0.764  | 0.222 | 1.473  | 0.011  | 1.41E-01 | 18518 | -0.660  | -1.484  | 0.163   | 0.420 | -1.573 | -0.011 | 1.16E-01 | 18709 |
| 18 | Olfactory_R          | 0.342  | -0.096 | 0.779  | 0.223 | 1.532  | 0.011  | 1.26E-01 | 18518 | -0.985  | -1.810  | -0.160  | 0.421 | -2.341 | -0.017 | 1.93E-02 | 18709 |
| 19 | Frontal_Sup_Medial_L | 6.920  | 4.175  | 9.666  | 1.401 | 4.941  | 0.036  | 7.84E-07 | 18518 | -13.549 | -18.735 | -8.363  | 2.646 | -5.121 | -0.037 | 3.07E-07 | 18709 |
| 20 | Frontal_Sup_Medial_R | 5.652  | 3.654  | 7.650  | 1.019 | 5.545  | 0.041  | 2.98E-08 | 18518 | -8.431  | -12.206 | -4.655  | 1.926 | -4.377 | -0.032 | 1.21E-05 | 18709 |
| 21 | Frontal_Med_Orb_L    | 2.192  | 1.164  | 3.219  | 0.524 | 4.182  | 0.031  | 2.90E-05 | 18518 | -2.196  | -4.134  | -0.257  | 0.989 | -2.220 | -0.016 | 2.64E-02 | 18709 |
| 22 | Frontal_Med_Orb_R    | 2.788  | 1.526  | 4.051  | 0.644 | 4.330  | 0.032  | 1.50E-05 | 18518 | -3.401  | -5.784  | -1.019  | 1.215 | -2.798 | -0.020 | 5.14E-03 | 18709 |
| 23 | Rectus_L             | 2.473  | 1.410  | 3.535  | 0.542 | 4.561  | 0.033  | 5.13E-06 | 18518 | -2.990  | -4.997  | -0.984  | 1.024 | -2.922 | -0.021 | 3.49E-03 | 18709 |
| 24 | Rectus_R             | 2.427  | 1.444  | 3.409  | 0.501 | 4.840  | 0.036  | 1.31E-06 | 18518 | -2.762  | -4.617  | -0.906  | 0.947 | -2.918 | -0.021 | 3.53E-03 | 18709 |
| 25 | OFCmed_L             | 1.520  | 0.905  | 2.136  | 0.314 | 4.845  | 0.036  | 1.27E-06 | 18518 | -2.021  | -3.184  | -0.859  | 0.593 | -3.408 | -0.025 | 6.56E-04 | 18709 |
| 26 | OFCmed_R             | 1.515  | 0.798  | 2.232  | 0.366 | 4.140  | 0.030  | 3.49E-05 | 18518 | -2.368  | -3.723  | -1.013  | 0.691 | -3.426 | -0.025 | 6.13E-04 | 18709 |
| 27 | OFCant_L             | 1.263  | 0.551  | 1.975  | 0.363 | 3.477  | 0.026  | 5.09E-04 | 18518 | -1.837  | -3.183  | -0.492  | 0.686 | -2.678 | -0.020 | 7.42E-03 | 18709 |
| 28 | OFCant_R             | 2.005  | 1.065  | 2.945  | 0.480 | 4.181  | 0.031  | 2.92E-05 | 18518 | -3.594  | -5.370  | -1.818  | 0.906 | -3.966 | -0.029 | 7.33E-05 | 18709 |
| 29 | OFCpost_L            | 1.220  | 0.329  | 2.110  | 0.454 | 2.684  | 0.020  | 7.28E-03 | 18518 | -2.385  | -4.069  | -0.701  | 0.859 | -2.775 | -0.020 | 5.52E-03 | 18709 |
| 30 | OFCpost_R            | 1.945  | 1.122  | 2.769  | 0.420 | 4.630  | 0.034  | 3.67E-06 | 18518 | -3.570  | -5.126  | -2.015  | 0.794 | -4.499 | -0.033 | 6.88E-06 | 18709 |
| 31 | OFClat_L             | 0.777  | 0.477  | 1.078  | 0.153 | 5.067  | 0.037  | 4.09E-07 | 18518 | -0.688  | -1.256  | -0.120  | 0.290 | -2.373 | -0.017 | 1.76E-02 | 18709 |
| 32 | OFClat_R             | 0.831  | 0.577  | 1.085  | 0.129 | 6.417  | 0.047  | 1.42E-10 | 18518 | -1.045  | -1.525  | -0.566  | 0.245 | -4.272 | -0.031 | 1.95E-05 | 18709 |
| 33 | Insula_L             | 3.848  | 1.091  | 6.606  | 1.407 | 2.735  | 0.020  | 6.24E-03 | 18518 | -8.711  | -13.917 | -3.504  | 2.656 | -3.279 | -0.024 | 1.04E-03 | 18709 |
| 34 | Insula_R             | 4.462  | 1.776  | 7.149  | 1.371 | 3.256  | 0.024  | 1.13E-03 | 18518 | -9.514  | -14.585 | -4.443  | 2.587 | -3.678 | -0.027 | 2.36E-04 | 18709 |
| 37 | Cingulate_Mid_L      | 5.337  | 3.005  | 7.670  | 1.190 | 4.485  | 0.033  | 7.33E-06 | 18518 | -14.496 | -18.894 | -10.098 | 2.244 | -6.461 | -0.047 | 1.07E-10 | 18709 |
| 38 | Cingulate_Mid_R      | 5.041  | 2.554  | 7.528  | 1.269 | 3.973  | 0.029  | 7.13E-05 | 18518 | -14.809 | -19.499 | -10.119 | 2.393 | -6.189 | -0.045 | 6.17E-10 | 18709 |
| 39 | Cingulate_Post_L     | 0.382  | -0.330 | 1.093  | 0.363 | 1.052  | 0.008  | 2.93E-01 | 18518 | -3.633  | -4.977  | -2.289  | 0.686 | -5.300 | -0.039 | 1.17E-07 | 18709 |
| 40 | Cingulate_Post_R     | -0.017 | -0.412 | 0.378  | 0.202 | -0.085 | -0.001 | 9.32E-01 | 18518 | -1.756  | -2.501  | -1.011  | 0.380 | -4.619 | -0.034 | 3.88E-06 | 18709 |
| 41 | Hippocampus_L        | 1.912  | 0.761  | 3.062  | 0.587 | 3.255  | 0.024  | 1.13E-03 | 18518 | -0.566  | -2.740  | 1.609   | 1.110 | -0.510 | -0.004 | 6.10E-01 | 18709 |
| 42 | Hippocampus_R        | 2.033  | 0.838  | 3.227  | 0.609 | 3.336  | 0.025  | 8.51E-04 | 18518 | 0.629   | -1.626  | 2.885   | 1.151 | 0.547  | 0.004  | 5.85E-01 | 18709 |
| 43 | ParaHippocampal_L    | 2.707  | 1.684  | 3.731  | 0.522 | 5.185  | 0.038  | 2.18E-07 | 18518 | -0.900  | -2.832  | 1.033   | 0.986 | -0.913 | -0.007 | 3.61E-01 | 18709 |
| 44 | ParaHippocampal_R    | 3.697  | 2.406  | 4.989  | 0.659 | 5.613  | 0.041  | 2.02E-08 | 18518 | -0.067  | -2.505  | 2.371   | 1.244 | -0.054 | 0.000  | 9.57E-01 | 18709 |
| 45 | Amygdala_L           | 0.536  | 0.138  | 0.933  | 0.203 | 2.642  | 0.019  | 8.24E-03 | 18518 | -0.050  | -0.801  | 0.701   | 0.383 | -0.131 | -0.001 | 8.96E-01 | 18709 |
| 46 | Amygdala_R           | 0.550  | 0.143  | 0.957  | 0.208 | 2.648  | 0.019  | 8.11E-03 | 18518 | -0.266  | -1.034  | 0.502   | 0.392 | -0.679 | -0.005 | 4.97E-01 | 18709 |
| 47 | Calcarine_L          | -1.251 | -5.042 | 2.540  | 1.934 | -0.647 | -0.005 | 5.18E-01 | 18518 | -2.041  | -9.208  | 5.126   | 3.656 | -0.558 | -0.004 | 5.77E-01 | 18709 |
| 48 | Calcarine_R          | -0.368 | -3.535 | 2.799  | 1.616 | -0.228 | -0.002 | 8.20E-01 | 18518 | -2.800  | -8.791  | 3.191   | 3.057 | -0.916 | -0.007 | 3.60E-01 | 18709 |
| 49 | Cuneus_L             | -0.278 | -2.659 | 2.103  | 1.215 | -0.229 | -0.002 | 8.19E-01 | 18518 | -2.630  | -7.125  | 1.865   | 2.293 | -1.147 | -0.008 | 2.51E-01 | 18709 |
| 50 | Cuneus_R             | 0.945  | -0.877 | 2.766  | 0.929 | 1.017  | 0.007  | 3.09E-01 | 18518 | -6.725  | -10.162 | -3.287  | 1.754 | -3.835 | -0.028 | 1.26E-04 | 18709 |
| 51 | Lingual_L            | 1.456  | -0.823 | 3.736  | 1.163 | 1.252  | 0.009  | 2.11E-01 | 18518 | -6.321  | -10.629 | -2.014  | 2.198 | -2.877 | -0.021 | 4.03E-03 | 18709 |
| 52 | Lingual_R            | 2.437  | 0.048  | 4.826  | 1.219 | 1.999  | 0.015  | 4.56E-02 | 18518 | -4.150  | -8.665  | 0.366   | 2.304 | -1.801 | -0.013 | 7.17E-02 | 18709 |
| 53 | Occipital_Sup_L      | 1.361  | -0.206 | 2.929  | 0.800 | 1.702  | 0.013  | 8.87E-02 | 18518 | -4.339  | -7.301  | -1.378  | 1.511 | -2.872 | -0.021 | 4.09E-03 | 18709 |
| 54 | Occipital_Sup_R      | 2.290  | 0.590  | 3.990  | 0.867 | 2.640  | 0.019  | 8.29E-03 | 18518 | -6.352  | -9.561  | -3.143  | 1.637 | -3.880 | -0.028 | 1.05E-04 | 18709 |
| 55 | Occipital_Mid_L      | 2.933  | -0.746 | 6.612  | 1.877 | 1.563  | 0.011  | 1.18E-01 | 18518 | -11.493 | -18.435 | -4.551  | 3.542 | -3.245 | -0.024 | 1.18E-03 | 18709 |
| 56 | Occipital_Mid_R      | 0.620  | -1.938 | 3.179  | 1.305 | 0.475  | 0.003  | 6.35E-01 | 18518 | -6.243  | -11.074 | -1.412  | 2.465 | -2.533 | -0.019 | 1.13E-02 | 18709 |
| 57 | Occipital_Inf_L      | -0.498 | -1.719 | 0.723  | 0.623 | -0.799 | -0.006 | 4.24E-01 | 18518 | -1.508  | -3.814  | 0.797   | 1.176 | -1.282 | -0.009 | 2.00E-01 | 18709 |
| 58 | Occipital_Inf_R      | -2.251 | -3.661 | -0.841 | 0.719 | -3.130 | -0.023 | 1.75E-03 | 18518 | -2.173  | -4.837  | 0.490   | 1.359 | -1.600 | -0.012 | 1.10E-01 | 18709 |
| 59 | Fusiform_L           | 5.771  | 3.101  | 8.440  | 1.362 | 4.237  | 0.031  | 2.28E-05 | 18518 | -3.337  | -8.382  | 1.708   | 2.574 | -1.296 | -0.009 | 1.95E-01 | 18709 |
| 60 | Fusiform_R           | 7.246  | 4.312  | 10.181 | 1.497 | 4.840  | 0.036  | 1.31E-06 | 18518 | -2.660  | -8.205  | 2.884   | 2.829 | -0.941 | -0.007 | 3.47E-01 | 18709 |
| 61 | Postcentra_L         | 11.133 | 7.115  | 15.151 | 2.050 | 5.431  | 0.040  | 5.67E-08 | 18518 | -18.515 | -26.102 | -10.927 | 3.871 | -4.783 | -0.035 | 1.74E-06 | 18709 |
| 62 | Postcentra_R         | 10.827 | 6.709  | 14.946 | 2.101 | 5.153  | 0.038  | 2.59E-07 | 18518 | -15.139 | -22.918 | -7.359  | 3.969 | -3.814 | -0.028 | 1.37E-04 | 18709 |
| 63 | Parietal_Sup_L       | 1.137  | -1.178 | 3.451  | 1.181 | 0.963  | 0.007  | 3.36E-01 | 18518 | -7.028  | -11.400 | -2.656  | 2.231 | -3.151 | -0.023 | 1.63E-03 | 18709 |
| 64 | Parietal_Sup_R       | 0.061  | -1.994 | 2.115  | 1.048 | 0.058  | 0.000  | 9.54E-01 | 18518 | -7.866  | -11.743 | -3.989  | 1.978 | -3.977 | -0.029 | 7.01E-05 | 18709 |

|     |                      |        |        |        |       |        |        |          |       |         |         |         |       |        |        |          |       |
|-----|----------------------|--------|--------|--------|-------|--------|--------|----------|-------|---------|---------|---------|-------|--------|--------|----------|-------|
| 65  | Parietal_Inf_L       | 3.370  | 0.340  | 6.399  | 1.546 | 2.180  | 0.016  | 2.93E-02 | 18518 | -16.800 | -22.522 | -11.078 | 2.919 | -5.755 | -0.042 | 8.82E-09 | 18709 |
| 66  | Parietal_Inf_R       | 0.706  | -1.257 | 2.669  | 1.002 | 0.705  | 0.005  | 4.81E-01 | 18518 | -8.265  | -11.971 | -4.559  | 1.891 | -4.371 | -0.032 | 1.24E-05 | 18709 |
| 67  | SupraMarginal_L      | 1.759  | -0.018 | 3.535  | 0.906 | 1.941  | 0.014  | 5.23E-02 | 18518 | -4.725  | -8.081  | -1.369  | 1.712 | -2.760 | -0.020 | 5.79E-03 | 18709 |
| 68  | SupraMarginal_R      | 5.107  | 2.595  | 7.619  | 1.281 | 3.985  | 0.029  | 6.77E-05 | 18518 | -9.559  | -14.303 | -4.815  | 2.420 | -3.950 | -0.029 | 7.86E-05 | 18709 |
| 69  | Angular_L            | 1.772  | 0.027  | 3.517  | 0.890 | 1.990  | 0.015  | 4.66E-02 | 18518 | -6.915  | -10.209 | -3.620  | 1.681 | -4.114 | -0.030 | 3.91E-05 | 18709 |
| 70  | Angular_R            | -0.130 | -2.470 | 2.211  | 1.194 | -0.108 | -0.001 | 9.14E-01 | 18518 | -6.853  | -11.271 | -2.434  | 2.254 | -3.040 | -0.022 | 2.37E-03 | 18709 |
| 71  | Precuneus_L          | 3.386  | -0.870 | 7.641  | 2.171 | 1.559  | 0.011  | 1.19E-01 | 18518 | -16.237 | -24.265 | -8.209  | 4.096 | -3.964 | -0.029 | 7.39E-05 | 18709 |
| 72  | Precuneus_R          | 3.014  | -0.777 | 6.804  | 1.934 | 1.558  | 0.011  | 1.19E-01 | 18518 | -16.454 | -23.605 | -9.304  | 3.648 | -4.511 | -0.033 | 6.50E-06 | 18709 |
| 73  | Paracentral_Lobule_L | 2.249  | 0.303  | 4.195  | 0.993 | 2.265  | 0.017  | 2.35E-02 | 18518 | -4.256  | -7.935  | -0.577  | 1.877 | -2.268 | -0.017 | 2.34E-02 | 18709 |
| 74  | Paracentral_Lobule_R | 2.471  | 1.077  | 3.865  | 0.711 | 3.475  | 0.026  | 5.13E-04 | 18518 | -1.737  | -4.372  | 0.898   | 1.344 | -1.292 | -0.009 | 1.96E-01 | 18709 |
| 75  | Caudate_L            | 2.567  | 1.013  | 4.121  | 0.793 | 3.237  | 0.024  | 1.21E-03 | 18518 | -2.076  | -5.015  | 0.862   | 1.499 | -1.385 | -0.010 | 1.66E-01 | 18709 |
| 76  | Caudate_R            | 2.909  | 1.150  | 4.668  | 0.898 | 3.241  | 0.024  | 1.19E-03 | 18518 | -2.045  | -5.370  | 1.280   | 1.696 | -1.205 | -0.009 | 2.28E-01 | 18709 |
| 77  | Putamen_L            | 3.285  | 0.922  | 5.647  | 1.205 | 2.725  | 0.020  | 6.43E-03 | 18518 | -7.330  | -11.790 | -2.870  | 2.275 | -3.221 | -0.024 | 1.28E-03 | 18709 |
| 78  | Putamen_R            | 2.975  | 0.570  | 5.381  | 1.227 | 2.425  | 0.018  | 1.53E-02 | 18518 | -7.788  | -12.330 | -3.246  | 2.317 | -3.361 | -0.025 | 7.78E-04 | 18709 |
| 79  | Pallidum_L           | 0.236  | 0.026  | 0.446  | 0.107 | 2.207  | 0.016  | 2.73E-02 | 18518 | -0.612  | -1.009  | -0.216  | 0.202 | -3.027 | -0.022 | 2.47E-03 | 18709 |
| 80  | Pallidum_R           | 0.247  | 0.017  | 0.477  | 0.118 | 2.101  | 0.015  | 3.56E-02 | 18518 | -0.702  | -1.138  | -0.267  | 0.222 | -3.162 | -0.023 | 1.57E-03 | 18709 |
| 83  | Heschl_L             | 0.287  | -0.140 | 0.713  | 0.217 | 1.318  | 0.010  | 1.88E-01 | 18518 | -1.387  | -2.191  | -0.583  | 0.410 | -3.380 | -0.025 | 7.26E-04 | 18709 |
| 84  | Heschl_R             | 0.458  | -0.018 | 0.934  | 0.243 | 1.885  | 0.014  | 5.94E-02 | 18518 | -1.725  | -2.623  | -0.827  | 0.458 | -3.764 | -0.028 | 1.68E-04 | 18709 |
| 85  | Temporal_Sup_L       | 5.066  | 1.994  | 8.139  | 1.568 | 3.232  | 0.024  | 1.23E-03 | 18518 | -8.821  | -14.626 | -3.015  | 2.962 | -2.978 | -0.022 | 2.90E-03 | 18709 |
| 86  | Temporal_Sup_R       | 9.073  | 5.673  | 12.474 | 1.735 | 5.230  | 0.038  | 1.71E-07 | 18518 | -15.772 | -22.191 | -9.353  | 3.275 | -4.816 | -0.035 | 1.48E-06 | 18709 |
| 87  | Temporal_Pole_Sup_L  | 2.248  | 0.790  | 3.707  | 0.744 | 3.022  | 0.022  | 2.52E-03 | 18518 | -3.921  | -6.672  | -1.171  | 1.403 | -2.795 | -0.020 | 5.20E-03 | 18709 |
| 88  | Temporal_Pole_Sup_R  | 3.418  | 1.883  | 4.953  | 0.783 | 4.366  | 0.032  | 1.27E-05 | 18518 | -4.887  | -7.782  | -1.992  | 1.477 | -3.309 | -0.024 | 9.38E-04 | 18709 |
| 89  | Temporal_Mid_L       | 12.123 | 7.003  | 17.244 | 2.612 | 4.641  | 0.034  | 3.49E-06 | 18518 | -17.731 | -27.404 | -8.057  | 4.935 | -3.593 | -0.026 | 3.28E-04 | 18709 |
| 90  | Temporal_Mid_R       | 8.683  | 4.134  | 13.233 | 2.321 | 3.741  | 0.027  | 1.84E-04 | 18518 | -17.648 | -26.231 | -9.065  | 4.379 | -4.030 | -0.029 | 5.59E-05 | 18709 |
| 91  | Temporal_Pole_Mid_L  | 1.923  | 0.698  | 3.149  | 0.625 | 3.077  | 0.023  | 2.10E-03 | 18518 | -1.593  | -3.906  | 0.719   | 1.180 | -1.351 | -0.010 | 1.77E-01 | 18709 |
| 92  | Temporal_Pole_Mid_R  | 3.059  | 1.571  | 4.548  | 0.759 | 4.029  | 0.030  | 5.63E-05 | 18518 | -2.291  | -5.100  | 0.518   | 1.433 | -1.599 | -0.012 | 1.10E-01 | 18709 |
| 93  | Temporal_Inf_L       | 3.646  | 0.124  | 7.167  | 1.797 | 2.029  | 0.015  | 4.24E-02 | 18518 | -6.857  | -13.504 | -0.209  | 3.392 | -2.022 | -0.015 | 4.32E-02 | 18709 |
| 94  | Temporal_Inf_R       | 3.311  | -0.531 | 7.154  | 1.960 | 1.689  | 0.012  | 9.12E-02 | 18518 | -7.074  | -14.323 | 0.174   | 3.698 | -1.913 | -0.014 | 5.58E-02 | 18709 |
| 95  | Cerebellum_Crus1_L   | 3.275  | -0.907 | 7.456  | 2.133 | 1.535  | 0.011  | 1.25E-01 | 18518 | 5.248   | -2.650  | 13.146  | 4.029 | 1.302  | 0.010  | 1.93E-01 | 18709 |
| 96  | Cerebellum_Crus1_R   | 4.651  | 0.387  | 8.915  | 2.175 | 2.138  | 0.016  | 3.25E-02 | 18518 | 3.034   | -5.024  | 11.092  | 4.111 | 0.738  | 0.005  | 4.61E-01 | 18709 |
| 97  | Cerebellum_Crus2_L   | 7.523  | 4.210  | 10.835 | 1.690 | 4.451  | 0.033  | 8.59E-06 | 18518 | -4.791  | -11.059 | 1.478   | 3.198 | -1.498 | -0.011 | 1.34E-01 | 18709 |
| 98  | Cerebellum_Crus2_R   | 6.764  | 3.699  | 9.829  | 1.564 | 4.326  | 0.032  | 1.53E-05 | 18518 | -2.516  | -8.315  | 3.283   | 2.959 | -0.850 | -0.006 | 3.95E-01 | 18709 |
| 99  | Cerebellum_3_L       | 0.159  | -0.064 | 0.381  | 0.114 | 1.396  | 0.010  | 1.63E-01 | 18518 | -0.002  | -0.423  | 0.418   | 0.215 | -0.011 | 0.000  | 9.91E-01 | 18709 |
| 100 | Cerebellum_3_R       | 0.280  | -0.021 | 0.580  | 0.153 | 1.822  | 0.013  | 6.85E-02 | 18518 | -0.568  | -1.136  | -0.001  | 0.290 | -1.963 | -0.014 | 4.97E-02 | 18709 |
| 101 | Cerebellum_4_5_L     | 1.726  | -0.075 | 3.527  | 0.919 | 1.878  | 0.014  | 6.04E-02 | 18518 | -0.827  | -4.229  | 2.575   | 1.736 | -0.477 | -0.003 | 6.34E-01 | 18709 |
| 102 | Cerebellum_4_5_R     | 1.917  | 0.449  | 3.385  | 0.749 | 2.560  | 0.019  | 1.05E-02 | 18518 | -2.323  | -5.095  | 0.449   | 1.414 | -1.643 | -0.012 | 1.00E-01 | 18709 |
| 103 | Cerebellum_6_L       | 3.519  | 0.406  | 6.633  | 1.589 | 2.215  | 0.016  | 2.67E-02 | 18518 | 0.803   | -5.076  | 6.682   | 2.999 | 0.268  | 0.002  | 7.89E-01 | 18709 |
| 104 | Cerebellum_6_R       | 4.427  | 1.149  | 7.705  | 1.672 | 2.647  | 0.019  | 8.12E-03 | 18518 | 0.432   | -5.763  | 6.627   | 3.161 | 0.137  | 0.001  | 8.91E-01 | 18709 |
| 105 | Cerebellum_7b_L      | 2.624  | 1.611  | 3.637  | 0.517 | 5.078  | 0.037  | 3.86E-07 | 18518 | -1.325  | -3.241  | 0.591   | 0.977 | -1.355 | -0.010 | 1.75E-01 | 18709 |
| 106 | Cerebellum_7b_R      | 2.988  | 1.985  | 3.991  | 0.512 | 5.837  | 0.043  | 5.40E-09 | 18518 | -1.212  | -3.111  | 0.687   | 0.969 | -1.251 | -0.009 | 2.11E-01 | 18709 |
| 107 | Cerebellum_8_L       | 4.079  | 0.862  | 7.295  | 1.641 | 2.485  | 0.018  | 1.30E-02 | 18518 | 0.343   | -5.739  | 6.424   | 3.103 | 0.110  | 0.001  | 9.12E-01 | 18709 |
| 108 | Cerebellum_8_R       | 9.658  | 5.470  | 13.846 | 2.136 | 4.521  | 0.033  | 6.20E-06 | 18518 | -5.682  | -13.598 | 2.234   | 4.039 | -1.407 | -0.010 | 1.59E-01 | 18709 |
| 109 | Cerebellum_9_L       | -1.571 | -3.391 | 0.249  | 0.928 | -1.692 | -0.012 | 9.06E-02 | 18518 | -0.050  | -3.489  | 3.389   | 1.754 | -0.028 | 0.000  | 9.77E-01 | 18709 |
| 110 | Cerebellum_9_R       | -1.266 | -3.056 | 0.523  | 0.913 | -1.387 | -0.010 | 1.65E-01 | 18518 | -0.864  | -4.244  | 2.516   | 1.725 | -0.501 | -0.004 | 6.16E-01 | 18709 |
| 111 | Cerebellum_10_L      | -0.200 | -0.329 | -0.071 | 0.066 | -3.040 | -0.022 | 2.37E-03 | 18518 | 0.024   | -0.220  | 0.268   | 0.124 | 0.193  | 0.001  | 8.47E-01 | 18709 |
| 112 | Cerebellum_10_R      | -0.043 | -0.177 | 0.092  | 0.069 | -0.624 | -0.005 | 5.33E-01 | 18518 | -0.029  | -0.283  | 0.225   | 0.130 | -0.222 | -0.002 | 8.25E-01 | 18709 |
| 113 | Vermis_1_2           | 0.074  | -0.010 | 0.158  | 0.043 | 1.717  | 0.013  | 8.60E-02 | 18518 | -0.145  | -0.304  | 0.013   | 0.081 | -1.797 | -0.013 | 7.24E-02 | 18709 |
| 114 | Vermis_3             | 0.439  | 0.105  | 0.772  | 0.170 | 2.575  | 0.019  | 1.00E-02 | 18518 | -0.792  | -1.422  | -0.161  | 0.322 | -2.462 | -0.018 | 1.38E-02 | 18709 |

|     |            |        |        |       |       |        |        |          |       |        |        |        |       |        |        |          |       |
|-----|------------|--------|--------|-------|-------|--------|--------|----------|-------|--------|--------|--------|-------|--------|--------|----------|-------|
| 115 | Vermis_4_5 | 0.545  | -0.437 | 1.526 | 0.501 | 1.088  | 0.008  | 2.77E-01 | 18518 | -0.614 | -2.467 | 1.239  | 0.946 | -0.650 | -0.005 | 5.16E-01 | 18709 |
| 116 | Vermis_6   | 0.002  | -0.544 | 0.549 | 0.279 | 0.009  | 0.000  | 9.93E-01 | 18518 | 0.416  | -0.616 | 1.447  | 0.526 | 0.790  | 0.006  | 4.29E-01 | 18709 |
| 117 | Vermis_7   | 0.045  | -0.264 | 0.354 | 0.158 | 0.288  | 0.002  | 7.74E-01 | 18518 | 0.231  | -0.352 | 0.814  | 0.297 | 0.777  | 0.006  | 4.37E-01 | 18709 |
| 118 | Vermis_8   | -0.256 | -0.764 | 0.251 | 0.259 | -0.991 | -0.007 | 3.22E-01 | 18518 | 0.390  | -0.568 | 1.349  | 0.489 | 0.798  | 0.006  | 4.25E-01 | 18709 |
| 119 | Vermis_9   | -0.318 | -0.729 | 0.093 | 0.210 | -1.516 | -0.011 | 1.29E-01 | 18518 | 0.370  | -0.407 | 1.147  | 0.396 | 0.934  | 0.007  | 3.50E-01 | 18709 |
| 120 | Vermis_10  | -0.097 | -0.211 | 0.018 | 0.058 | -1.651 | -0.012 | 9.87E-02 | 18518 | 0.085  | -0.132 | 0.302  | 0.111 | 0.770  | 0.006  | 4.41E-01 | 18709 |
| 121 | Thal_AV_L  | 0.113  | 0.067  | 0.159 | 0.023 | 4.809  | 0.035  | 1.53E-06 | 18518 | -0.160 | -0.247 | -0.073 | 0.044 | -3.618 | -0.026 | 2.98E-04 | 18709 |
| 122 | Thal_AV_R  | 0.187  | 0.121  | 0.253 | 0.034 | 5.567  | 0.041  | 2.63E-08 | 18518 | -0.239 | -0.363 | -0.115 | 0.063 | -3.780 | -0.028 | 1.57E-04 | 18709 |
| 123 | Thal_LP_L  | 0.102  | 0.051  | 0.153 | 0.026 | 3.918  | 0.029  | 8.97E-05 | 18518 | -0.229 | -0.325 | -0.133 | 0.049 | -4.662 | -0.034 | 3.16E-06 | 18709 |
| 124 | Thal_LP_R  | 0.153  | 0.086  | 0.219 | 0.034 | 4.506  | 0.033  | 6.64E-06 | 18518 | -0.325 | -0.450 | -0.200 | 0.064 | -5.084 | -0.037 | 3.74E-07 | 18709 |
| 125 | Thal_VA_L  | 0.065  | 0.010  | 0.119 | 0.028 | 2.331  | 0.017  | 1.98E-02 | 18518 | -0.074 | -0.176 | 0.029  | 0.052 | -1.413 | -0.010 | 1.58E-01 | 18709 |
| 126 | Thal_VA_R  | 0.134  | 0.067  | 0.201 | 0.034 | 3.935  | 0.029  | 8.33E-05 | 18518 | -0.100 | -0.226 | 0.026  | 0.064 | -1.560 | -0.011 | 1.19E-01 | 18709 |
| 127 | Thal_VL_L  | 0.292  | 0.137  | 0.446 | 0.079 | 3.700  | 0.027  | 2.16E-04 | 18518 | -0.627 | -0.919 | -0.335 | 0.149 | -4.212 | -0.031 | 2.54E-05 | 18709 |
| 128 | Thal_VL_R  | 0.621  | 0.416  | 0.826 | 0.105 | 5.934  | 0.044  | 3.02E-09 | 18518 | -0.994 | -1.382 | -0.607 | 0.198 | -5.028 | -0.037 | 5.01E-07 | 18709 |
| 129 | Thal_VPL_L | 0.191  | 0.007  | 0.376 | 0.094 | 2.038  | 0.015  | 4.16E-02 | 18518 | -0.701 | -1.049 | -0.353 | 0.177 | -3.953 | -0.029 | 7.76E-05 | 18709 |
| 130 | Thal_VPL_R | 0.259  | 0.066  | 0.453 | 0.099 | 2.627  | 0.019  | 8.63E-03 | 18518 | -0.979 | -1.344 | -0.613 | 0.186 | -5.250 | -0.038 | 1.54E-07 | 18709 |
| 131 | Thal_IL_L  | 0.187  | 0.107  | 0.266 | 0.041 | 4.593  | 0.034  | 4.39E-06 | 18518 | -0.489 | -0.639 | -0.339 | 0.077 | -6.380 | -0.047 | 1.82E-10 | 18709 |
| 132 | Thal_IL_R  | 0.261  | 0.171  | 0.352 | 0.046 | 5.679  | 0.042  | 1.38E-08 | 18518 | -0.523 | -0.694 | -0.353 | 0.087 | -6.017 | -0.044 | 1.81E-09 | 18709 |
| 133 | Thal_Re_L  | 0.001  | 0.000  | 0.001 | 0.000 | 3.698  | 0.027  | 2.18E-04 | 18518 | 0.000  | -0.001 | 0.000  | 0.000 | -1.408 | -0.010 | 1.59E-01 | 18709 |
| 134 | Thal_Re_R  | 0.008  | 0.005  | 0.011 | 0.001 | 5.937  | 0.044  | 2.96E-09 | 18518 | -0.007 | -0.012 | -0.002 | 0.003 | -2.655 | -0.019 | 7.93E-03 | 18709 |
| 135 | Thal_MDm_L | 1.778  | 1.188  | 2.368 | 0.301 | 5.910  | 0.043  | 3.49E-09 | 18518 | -3.527 | -4.641 | -2.414 | 0.568 | -6.211 | -0.045 | 5.39E-10 | 18709 |
| 136 | Thal_MDm_R | 2.185  | 1.500  | 2.870 | 0.350 | 6.250  | 0.046  | 4.18E-10 | 18518 | -3.741 | -5.035 | -2.447 | 0.660 | -5.668 | -0.041 | 1.47E-08 | 18709 |
| 137 | Thal_MDI_L | 0.310  | 0.208  | 0.412 | 0.052 | 5.958  | 0.044  | 2.60E-09 | 18518 | -0.660 | -0.852 | -0.467 | 0.098 | -6.710 | -0.049 | 2.00E-11 | 18709 |
| 138 | Thal_MDI_R | 0.402  | 0.286  | 0.517 | 0.059 | 6.791  | 0.050  | 1.14E-11 | 18518 | -0.672 | -0.891 | -0.453 | 0.112 | -6.012 | -0.044 | 1.87E-09 | 18709 |
| 139 | Thal_LGN_L | 0.017  | 0.002  | 0.033 | 0.008 | 2.161  | 0.016  | 3.07E-02 | 18518 | -0.069 | -0.098 | -0.040 | 0.015 | -4.613 | -0.034 | 3.99E-06 | 18709 |
| 140 | Thal_LGN_R | 0.054  | 0.021  | 0.087 | 0.017 | 3.234  | 0.024  | 1.22E-03 | 18518 | -0.176 | -0.238 | -0.113 | 0.032 | -5.527 | -0.040 | 3.29E-08 | 18709 |
| 141 | Thal_MGN_L | 0.034  | 0.006  | 0.061 | 0.014 | 2.383  | 0.018  | 1.72E-02 | 18518 | -0.173 | -0.225 | -0.121 | 0.027 | -6.488 | -0.047 | 8.91E-11 | 18709 |
| 142 | Thal_MGN_R | 0.048  | 0.018  | 0.078 | 0.015 | 3.118  | 0.023  | 1.82E-03 | 18518 | -0.187 | -0.243 | -0.130 | 0.029 | -6.453 | -0.047 | 1.13E-10 | 18709 |
| 143 | Thal_PuA_L | 0.048  | 0.015  | 0.080 | 0.017 | 2.868  | 0.021  | 4.13E-03 | 18518 | -0.218 | -0.280 | -0.157 | 0.031 | -6.944 | -0.051 | 3.94E-12 | 18709 |
| 144 | Thal_PuA_R | 0.122  | 0.054  | 0.189 | 0.035 | 3.508  | 0.026  | 4.52E-04 | 18518 | -0.460 | -0.589 | -0.332 | 0.065 | -7.043 | -0.051 | 1.95E-12 | 18709 |
| 145 | Thal_PuM_L | 1.326  | 0.677  | 1.976 | 0.331 | 4.002  | 0.029  | 6.30E-05 | 18518 | -4.171 | -5.396 | -2.946 | 0.625 | -6.674 | -0.049 | 2.56E-11 | 18709 |
| 146 | Thal_PuM_R | 1.701  | 0.892  | 2.510 | 0.413 | 4.122  | 0.030  | 3.78E-05 | 18518 | -5.101 | -6.628 | -3.575 | 0.779 | -6.550 | -0.048 | 5.91E-11 | 18709 |
| 147 | Thal_PuL_L | 0.251  | 0.132  | 0.369 | 0.060 | 4.147  | 0.030  | 3.38E-05 | 18518 | -0.717 | -0.941 | -0.494 | 0.114 | -6.291 | -0.046 | 3.22E-10 | 18709 |
| 148 | Thal_PuL_R | 0.395  | 0.207  | 0.584 | 0.096 | 4.115  | 0.030  | 3.89E-05 | 18518 | -1.112 | -1.468 | -0.757 | 0.181 | -6.134 | -0.045 | 8.76E-10 | 18709 |
| 149 | Thal_PuL_L | 0.029  | -0.004 | 0.061 | 0.016 | 1.746  | 0.013  | 8.08E-02 | 18518 | -0.098 | -0.159 | -0.037 | 0.031 | -3.156 | -0.023 | 1.60E-03 | 18709 |
| 150 | Thal_PuL_R | 0.045  | 0.003  | 0.088 | 0.022 | 2.079  | 0.015  | 3.76E-02 | 18518 | -0.192 | -0.272 | -0.111 | 0.041 | -4.665 | -0.034 | 3.11E-06 | 18709 |
| 151 | ACC_sub_L  | -0.159 | -0.531 | 0.213 | 0.190 | -0.838 | -0.006 | 4.02E-01 | 18518 | -0.381 | -1.083 | 0.321  | 0.358 | -1.064 | -0.008 | 2.87E-01 | 18709 |
| 152 | ACC_sub_R  | -0.314 | -0.662 | 0.033 | 0.177 | -1.774 | -0.013 | 7.60E-02 | 18518 | -0.315 | -0.971 | 0.341  | 0.335 | -0.942 | -0.007 | 3.46E-01 | 18709 |
| 153 | ACC_pre_L  | 1.477  | 0.523  | 2.430 | 0.486 | 3.036  | 0.022  | 2.40E-03 | 18518 | -2.884 | -4.682 | -1.085 | 0.917 | -3.143 | -0.023 | 1.67E-03 | 18709 |
| 154 | ACC_pre_R  | 1.472  | 0.554  | 2.390 | 0.468 | 3.142  | 0.023  | 1.68E-03 | 18518 | -3.614 | -5.346 | -1.882 | 0.884 | -4.090 | -0.030 | 4.33E-05 | 18709 |
| 155 | ACC_sup_L  | 0.900  | -0.136 | 1.936 | 0.529 | 1.703  | 0.013  | 8.86E-02 | 18518 | -3.628 | -5.583 | -1.672 | 0.998 | -3.636 | -0.027 | 2.77E-04 | 18709 |
| 156 | ACC_sup_R  | 0.684  | -0.388 | 1.756 | 0.547 | 1.251  | 0.009  | 2.11E-01 | 18518 | -3.110 | -5.135 | -1.084 | 1.033 | -3.010 | -0.022 | 2.62E-03 | 18709 |
| 157 | N_Acc_L    | 0.448  | 0.136  | 0.759 | 0.159 | 2.819  | 0.021  | 4.82E-03 | 18518 | -0.409 | -0.997 | 0.180  | 0.300 | -1.362 | -0.010 | 1.73E-01 | 18709 |
| 158 | N_Acc_R    | 0.451  | 0.182  | 0.720 | 0.137 | 3.284  | 0.024  | 1.02E-03 | 18518 | -0.477 | -0.986 | 0.032  | 0.260 | -1.838 | -0.013 | 6.61E-02 | 18709 |
| 159 | VTA_L      | 0.017  | 0.006  | 0.027 | 0.006 | 2.952  | 0.022  | 3.16E-03 | 18518 | 0.002  | -0.018 | 0.023  | 0.011 | 0.212  | 0.002  | 8.32E-01 | 18709 |
| 160 | VTA_R      | 0.021  | 0.011  | 0.031 | 0.005 | 4.135  | 0.030  | 3.57E-05 | 18518 | -0.014 | -0.032 | 0.005  | 0.010 | -1.426 | -0.010 | 1.54E-01 | 18709 |
| 161 | SN_pc_L    | 0.007  | -0.011 | 0.024 | 0.009 | 0.767  | 0.006  | 4.43E-01 | 18518 | -0.040 | -0.073 | -0.006 | 0.017 | -2.340 | -0.017 | 1.93E-02 | 18709 |
| 162 | SN_pc_R    | 0.020  | -0.004 | 0.043 | 0.012 | 1.657  | 0.012  | 9.76E-02 | 18518 | -0.072 | -0.115 | -0.028 | 0.022 | -3.217 | -0.024 | 1.30E-03 | 18709 |

|     |         |       |        |       |       |       |       |          |       |        |        |        |       |        |        |          |       |
|-----|---------|-------|--------|-------|-------|-------|-------|----------|-------|--------|--------|--------|-------|--------|--------|----------|-------|
| 163 | SN_pr_L | 0.013 | -0.011 | 0.037 | 0.012 | 1.086 | 0.008 | 2.78E-01 | 18518 | -0.042 | -0.087 | 0.004  | 0.023 | -1.805 | -0.013 | 7.10E-02 | 18709 |
| 164 | SN_pr_R | 0.022 | -0.005 | 0.049 | 0.014 | 1.604 | 0.012 | 1.09E-01 | 18518 | -0.036 | -0.087 | 0.014  | 0.026 | -1.406 | -0.010 | 1.60E-01 | 18709 |
| 165 | Red_N_L | 0.037 | 0.008  | 0.067 | 0.015 | 2.472 | 0.018 | 1.34E-02 | 18518 | -0.082 | -0.138 | -0.027 | 0.028 | -2.895 | -0.021 | 3.80E-03 | 18709 |
| 166 | Red_N_R | 0.065 | 0.032  | 0.097 | 0.016 | 3.940 | 0.029 | 8.17E-05 | 18518 | -0.101 | -0.162 | -0.040 | 0.031 | -3.269 | -0.024 | 1.08E-03 | 18709 |
| 167 | LC_L    | 0.005 | -0.006 | 0.016 | 0.006 | 0.852 | 0.006 | 3.94E-01 | 18518 | -0.010 | -0.031 | 0.011  | 0.011 | -0.966 | -0.007 | 3.34E-01 | 18709 |
| 168 | LC_R    | 0.003 | -0.009 | 0.015 | 0.006 | 0.503 | 0.004 | 6.15E-01 | 18518 | -0.014 | -0.037 | 0.009  | 0.012 | -1.218 | -0.009 | 2.23E-01 | 18709 |
| 169 | Raphe_D | 0.116 | 0.074  | 0.159 | 0.022 | 5.350 | 0.039 | 8.88E-08 | 18518 | -0.186 | -0.267 | -0.105 | 0.041 | -4.518 | -0.033 | 6.29E-06 | 18709 |
| 170 | Raphe_M | 0.019 | 0.006  | 0.032 | 0.007 | 2.840 | 0.021 | 4.51E-03 | 18518 | -0.014 | -0.038 | 0.011  | 0.013 | -1.086 | -0.008 | 2.77E-01 | 18709 |

**Bread intake**

**Pork intake**

| Number | AAL 3 region         | beta   | 95%CI l | 95%CI h | se    | t      | r      | p        | df.e  | beta     | 95%CI l  | 95%CI h  | se     | t      | r      | p        | df.e  |
|--------|----------------------|--------|---------|---------|-------|--------|--------|----------|-------|----------|----------|----------|--------|--------|--------|----------|-------|
| 0      | Total brain          | -4.371 | -23.834 | 15.091  | 9.929 | -0.440 | -0.003 | 6.60E-01 | 18607 | -591.260 | -785.720 | -396.801 | 99.209 | -5.960 | -0.044 | 2.57E-09 | 18697 |
| 1      | Precentral_L         | -0.300 | -0.986  | 0.385   | 0.350 | -0.859 | -0.006 | 3.90E-01 | 18607 | -9.043   | -15.896  | -2.189   | 3.497  | -2.586 | -0.019 | 9.71E-03 | 18697 |
| 2      | Precentral_R         | 0.351  | -0.277  | 0.979   | 0.320 | 1.094  | 0.008  | 2.74E-01 | 18607 | -12.589  | -18.867  | -6.312   | 3.203  | -3.931 | -0.029 | 8.49E-05 | 18697 |
| 3      | Frontal_Sup_2_L      | 0.764  | 0.040   | 1.487   | 0.369 | 2.070  | 0.015  | 3.85E-02 | 18607 | -16.730  | -23.963  | -9.496   | 3.690  | -4.533 | -0.033 | 5.84E-06 | 18697 |
| 4      | Frontal_Sup_2_R      | 0.857  | 0.059   | 1.654   | 0.407 | 2.105  | 0.015  | 3.53E-02 | 18607 | -17.157  | -25.129  | -9.184   | 4.067  | -4.218 | -0.031 | 2.48E-05 | 18697 |
| 5      | Frontal_Mid_2_L      | 0.331  | -0.428  | 1.091   | 0.387 | 0.856  | 0.006  | 3.92E-01 | 18607 | -8.993   | -16.589  | -1.398   | 3.875  | -2.321 | -0.017 | 2.03E-02 | 18697 |
| 6      | Frontal_Mid_2_R      | 0.570  | -0.289  | 1.429   | 0.438 | 1.300  | 0.010  | 1.94E-01 | 18607 | -19.092  | -27.685  | -10.498  | 4.384  | -4.355 | -0.032 | 1.34E-05 | 18697 |
| 7      | Frontal_Inf_Oper_L   | -0.113 | -0.337  | 0.111   | 0.114 | -0.989 | -0.007 | 3.23E-01 | 18607 | -3.606   | -5.851   | -1.361   | 1.145  | -3.149 | -0.023 | 1.64E-03 | 18697 |
| 8      | Frontal_Inf_Oper_R   | 0.173  | -0.108  | 0.455   | 0.144 | 1.206  | 0.009  | 2.28E-01 | 18607 | -5.893   | -8.708   | -3.078   | 1.436  | -4.104 | -0.030 | 4.08E-05 | 18697 |
| 9      | Frontal_Inf_Tri_L    | 0.109  | -0.368  | 0.586   | 0.243 | 0.449  | 0.003  | 6.53E-01 | 18607 | -11.163  | -15.929  | -6.396   | 2.432  | -4.591 | -0.034 | 4.45E-06 | 18697 |
| 10     | Frontal_Inf_Tri_R    | 0.030  | -0.344  | 0.404   | 0.191 | 0.157  | 0.001  | 8.75E-01 | 18607 | -10.087  | -13.830  | -6.345   | 1.909  | -5.283 | -0.039 | 1.28E-07 | 18697 |
| 11     | Frontal_Inf_Orb_2_L  | 0.146  | 0.004   | 0.289   | 0.073 | 2.015  | 0.015  | 4.39E-02 | 18607 | -2.389   | -3.814   | -0.963   | 0.727  | -3.285 | -0.024 | 1.02E-03 | 18697 |
| 12     | Frontal_Inf_Orb_2_R  | 0.117  | -0.032  | 0.266   | 0.076 | 1.541  | 0.011  | 1.23E-01 | 18607 | -2.638   | -4.128   | -1.148   | 0.760  | -3.470 | -0.025 | 5.22E-04 | 18697 |
| 13     | Rolandic_Oper_L      | 0.040  | -0.175  | 0.256   | 0.110 | 0.368  | 0.003  | 7.13E-01 | 18607 | -4.448   | -6.603   | -2.292   | 1.100  | -4.043 | -0.030 | 5.29E-05 | 18697 |
| 14     | Rolandic_Oper_R      | 0.064  | -0.245  | 0.372   | 0.157 | 0.404  | 0.003  | 6.86E-01 | 18607 | -8.810   | -11.894  | -5.725   | 1.574  | -5.598 | -0.041 | 2.19E-08 | 18697 |
| 15     | Supp_Motor_Area_L    | -0.083 | -0.596  | 0.430   | 0.262 | -0.318 | -0.002 | 7.51E-01 | 18607 | -6.434   | -11.559  | -1.309   | 2.615  | -2.461 | -0.018 | 1.39E-02 | 18697 |
| 16     | Supp_Motor_Area_R    | -0.161 | -0.727  | 0.405   | 0.289 | -0.557 | -0.004 | 5.78E-01 | 18607 | -2.097   | -7.761   | 3.566    | 2.890  | -0.726 | -0.005 | 4.68E-01 | 18697 |
| 17     | Olfactory_L          | -0.045 | -0.121  | 0.032   | 0.039 | -1.148 | -0.008 | 2.51E-01 | 18607 | -1.229   | -1.991   | -0.468   | 0.389  | -3.163 | -0.023 | 1.56E-03 | 18697 |
| 18     | Olfactory_R          | -0.024 | -0.100  | 0.053   | 0.039 | -0.612 | -0.004 | 5.41E-01 | 18607 | -1.304   | -2.067   | -0.540   | 0.390  | -3.347 | -0.024 | 8.19E-04 | 18697 |
| 19     | Frontal_Sup_Medial_L | 0.279  | -0.202  | 0.759   | 0.245 | 1.137  | 0.008  | 2.55E-01 | 18607 | -10.905  | -15.709  | -6.102   | 2.451  | -4.450 | -0.033 | 8.64E-06 | 18697 |
| 20     | Frontal_Sup_Medial_R | 0.294  | -0.056  | 0.643   | 0.178 | 1.647  | 0.012  | 9.97E-02 | 18607 | -7.069   | -10.565  | -3.573   | 1.784  | -3.963 | -0.029 | 7.43E-05 | 18697 |
| 21     | Frontal_Med_Orb_L    | 0.170  | -0.010  | 0.349   | 0.092 | 1.853  | 0.014  | 6.40E-02 | 18607 | -3.928   | -5.721   | -2.134   | 0.915  | -4.293 | -0.031 | 1.78E-05 | 18697 |
| 22     | Frontal_Med_Orb_R    | 0.219  | -0.001  | 0.440   | 0.113 | 1.949  | 0.014  | 5.14E-02 | 18607 | -4.649   | -6.853   | -2.444   | 1.125  | -4.133 | -0.030 | 3.59E-05 | 18697 |
| 23     | Rectus_L             | 0.135  | -0.051  | 0.320   | 0.095 | 1.420  | 0.010  | 1.56E-01 | 18607 | -3.343   | -5.200   | -1.487   | 0.947  | -3.530 | -0.026 | 4.17E-04 | 18697 |
| 24     | Rectus_R             | 0.044  | -0.128  | 0.216   | 0.088 | 0.505  | 0.004  | 6.14E-01 | 18607 | -2.930   | -4.648   | -1.213   | 0.876  | -3.344 | -0.024 | 8.28E-04 | 18697 |
| 25     | OFCmed_L             | 0.018  | -0.090  | 0.125   | 0.055 | 0.324  | 0.002  | 7.46E-01 | 18607 | -1.764   | -2.841   | -0.688   | 0.549  | -3.213 | -0.023 | 1.32E-03 | 18697 |
| 26     | OFCmed_R             | 0.010  | -0.116  | 0.135   | 0.064 | 0.155  | 0.001  | 8.77E-01 | 18607 | -2.038   | -3.292   | -0.783   | 0.640  | -3.184 | -0.023 | 1.45E-03 | 18697 |
| 27     | OFCant_L             | 0.014  | -0.111  | 0.138   | 0.063 | 0.214  | 0.002  | 8.30E-01 | 18607 | -1.833   | -3.078   | -0.588   | 0.635  | -2.886 | -0.021 | 3.90E-03 | 18697 |
| 28     | OFCant_R             | 0.061  | -0.103  | 0.226   | 0.084 | 0.731  | 0.005  | 4.65E-01 | 18607 | -3.573   | -5.217   | -1.928   | 0.839  | -4.259 | -0.031 | 2.06E-05 | 18697 |
| 29     | OFCpost_L            | 0.028  | -0.128  | 0.184   | 0.080 | 0.353  | 0.003  | 7.24E-01 | 18607 | -3.156   | -4.714   | -1.597   | 0.795  | -3.970 | -0.029 | 7.22E-05 | 18697 |
| 30     | OFCpost_R            | 0.101  | -0.043  | 0.245   | 0.074 | 1.373  | 0.010  | 1.70E-01 | 18607 | -2.962   | -4.402   | -1.521   | 0.735  | -4.030 | -0.029 | 5.60E-05 | 18697 |
| 31     | OFClat_L             | 0.019  | -0.034  | 0.071   | 0.027 | 0.703  | 0.005  | 4.82E-01 | 18607 | -0.908   | -1.434   | -0.382   | 0.268  | -3.384 | -0.025 | 7.17E-04 | 18697 |
| 32     | OFClat_R             | 0.014  | -0.031  | 0.058   | 0.023 | 0.596  | 0.004  | 5.51E-01 | 18607 | -0.827   | -1.271   | -0.383   | 0.227  | -3.650 | -0.027 | 2.63E-04 | 18697 |
| 33     | Insula_L             | 0.020  | -0.462  | 0.502   | 0.246 | 0.081  | 0.001  | 9.35E-01 | 18607 | -13.326  | -18.143  | -8.508   | 2.458  | -5.422 | -0.040 | 5.96E-08 | 18697 |
| 34     | Insula_R             | 0.092  | -0.377  | 0.562   | 0.239 | 0.385  | 0.003  | 7.00E-01 | 18607 | -12.344  | -17.037  | -7.651   | 2.394  | -5.155 | -0.038 | 2.56E-07 | 18697 |
| 37     | Cingulate_Mid_L      | 0.298  | -0.110  | 0.705   | 0.208 | 1.433  | 0.011  | 1.52E-01 | 18607 | -12.976  | -17.046  | -8.906   | 2.076  | -6.249 | -0.046 | 4.21E-10 | 18697 |
| 38     | Cingulate_Mid_R      | 0.165  | -0.269  | 0.599   | 0.221 | 0.746  | 0.005  | 4.56E-01 | 18607 | -13.839  | -18.179  | -9.499   | 2.214  | -6.250 | -0.046 | 4.19E-10 | 18697 |
| 39     | Cingulate_Post_L     | 0.005  | -0.119  | 0.130   | 0.063 | 0.082  | 0.001  | 9.35E-01 | 18607 | -2.562   | -3.806   | -1.317   | 0.635  | -4.036 | -0.030 | 5.47E-05 | 18697 |



|    |                      |        |        |        |       |        |        |          |       |         |         |         |       |        |        |          |       |
|----|----------------------|--------|--------|--------|-------|--------|--------|----------|-------|---------|---------|---------|-------|--------|--------|----------|-------|
| 40 | Cingulate_Post_R     | -0.019 | -0.088 | 0.050  | 0.035 | -0.538 | -0.004 | 5.91E-01 | 18607 | -1.143  | -1.834  | -0.453  | 0.352 | -3.247 | -0.024 | 1.17E-03 | 18697 |
| 41 | Hippocampus_L        | -0.004 | -0.205 | 0.197  | 0.103 | -0.040 | 0.000  | 9.68E-01 | 18607 | -1.845  | -3.857  | 0.167   | 1.027 | -1.797 | -0.013 | 7.23E-02 | 18697 |
| 42 | Hippocampus_R        | -0.031 | -0.240 | 0.177  | 0.106 | -0.295 | -0.002 | 7.68E-01 | 18607 | -0.829  | -2.914  | 1.257   | 1.064 | -0.779 | -0.006 | 4.36E-01 | 18697 |
| 43 | ParaHippocampal_L    | 0.059  | -0.119 | 0.238  | 0.091 | 0.650  | 0.005  | 5.16E-01 | 18607 | -2.164  | -3.951  | -0.376  | 0.912 | -2.373 | -0.017 | 1.77E-02 | 18697 |
| 44 | ParaHippocampal_R    | 0.110  | -0.116 | 0.335  | 0.115 | 0.954  | 0.007  | 3.40E-01 | 18607 | -1.910  | -4.165  | 0.346   | 1.151 | -1.660 | -0.012 | 9.70E-02 | 18697 |
| 45 | Amygdala_L           | 0.013  | -0.057 | 0.082  | 0.035 | 0.364  | 0.003  | 7.16E-01 | 18607 | -0.544  | -1.238  | 0.151   | 0.354 | -1.534 | -0.011 | 1.25E-01 | 18697 |
| 46 | Amygdala_R           | 0.020  | -0.051 | 0.091  | 0.036 | 0.562  | 0.004  | 5.74E-01 | 18607 | -0.741  | -1.452  | -0.030  | 0.363 | -2.043 | -0.015 | 4.10E-02 | 18697 |
| 47 | Calcarine_L          | -1.484 | -2.147 | -0.820 | 0.338 | -4.384 | -0.032 | 1.17E-05 | 18607 | -2.444  | -9.080  | 4.192   | 3.386 | -0.722 | -0.005 | 4.70E-01 | 18697 |
| 48 | Calcarine_R          | -1.232 | -1.786 | -0.677 | 0.283 | -4.354 | -0.032 | 1.34E-05 | 18607 | -2.213  | -7.760  | 3.334   | 2.830 | -0.782 | -0.006 | 4.34E-01 | 18697 |
| 49 | Cuneus_L             | -0.689 | -1.105 | -0.273 | 0.212 | -3.248 | -0.024 | 1.17E-03 | 18607 | -4.724  | -8.884  | -0.563  | 2.123 | -2.225 | -0.016 | 2.61E-02 | 18697 |
| 50 | Cuneus_R             | -0.501 | -0.819 | -0.183 | 0.162 | -3.084 | -0.023 | 2.05E-03 | 18607 | -3.936  | -7.119  | -0.752  | 1.624 | -2.423 | -0.018 | 1.54E-02 | 18697 |
| 51 | Lingual_L            | -0.571 | -0.970 | -0.173 | 0.203 | -2.808 | -0.021 | 4.99E-03 | 18607 | -5.330  | -9.320  | -1.341  | 2.035 | -2.619 | -0.019 | 8.83E-03 | 18697 |
| 52 | Lingual_R            | -0.567 | -0.985 | -0.150 | 0.213 | -2.662 | -0.020 | 7.77E-03 | 18607 | -4.823  | -9.004  | -0.641  | 2.133 | -2.261 | -0.017 | 2.38E-02 | 18697 |
| 53 | Occipital_Sup_L      | -0.119 | -0.394 | 0.155  | 0.140 | -0.854 | -0.006 | 3.93E-01 | 18607 | -5.139  | -7.881  | -2.397  | 1.399 | -3.673 | -0.027 | 2.40E-04 | 18697 |
| 54 | Occipital_Sup_R      | -0.251 | -0.548 | 0.047  | 0.152 | -1.653 | -0.012 | 9.84E-02 | 18607 | -5.224  | -8.196  | -2.251  | 1.517 | -3.445 | -0.025 | 5.73E-04 | 18697 |
| 55 | Occipital_Mid_L      | -0.744 | -1.386 | -0.101 | 0.328 | -2.268 | -0.017 | 2.33E-02 | 18607 | -9.736  | -16.163 | -3.309  | 3.279 | -2.969 | -0.022 | 2.99E-03 | 18697 |
| 56 | Occipital_Mid_R      | -0.363 | -0.811 | 0.084  | 0.228 | -1.592 | -0.012 | 1.11E-01 | 18607 | -6.586  | -11.059 | -2.112  | 2.282 | -2.886 | -0.021 | 3.91E-03 | 18697 |
| 57 | Occipital_Inf_L      | -0.221 | -0.435 | -0.008 | 0.109 | -2.033 | -0.015 | 4.21E-02 | 18607 | -0.909  | -3.044  | 1.225   | 1.089 | -0.835 | -0.006 | 4.04E-01 | 18697 |
| 58 | Occipital_Inf_R      | -0.255 | -0.501 | -0.008 | 0.126 | -2.025 | -0.015 | 4.29E-02 | 18607 | 0.768   | -1.697  | 3.233   | 1.258 | 0.611  | 0.004  | 5.41E-01 | 18697 |
| 59 | Fusiform_L           | 0.170  | -0.297 | 0.636  | 0.238 | 0.713  | 0.005  | 4.76E-01 | 18607 | -3.691  | -8.360  | 0.978   | 2.382 | -1.550 | -0.011 | 1.21E-01 | 18697 |
| 60 | Fusiform_R           | 0.239  | -0.274 | 0.753  | 0.262 | 0.914  | 0.007  | 3.61E-01 | 18607 | -4.982  | -10.110 | 0.146   | 2.616 | -1.904 | -0.014 | 5.69E-02 | 18697 |
| 61 | Postcentral_L        | 0.440  | -0.263 | 1.143  | 0.358 | 1.227  | 0.009  | 2.20E-01 | 18607 | -15.447 | -22.466 | -8.427  | 3.581 | -4.313 | -0.032 | 1.62E-05 | 18697 |
| 62 | Postcentral_R        | 0.814  | 0.094  | 1.535  | 0.368 | 2.215  | 0.016  | 2.68E-02 | 18607 | -14.531 | -21.731 | -7.331  | 3.673 | -3.956 | -0.029 | 7.66E-05 | 18697 |
| 63 | Parietal_Sup_L       | -0.444 | -0.848 | -0.039 | 0.206 | -2.149 | -0.016 | 3.17E-02 | 18607 | -5.746  | -9.793  | -1.698  | 2.065 | -2.783 | -0.020 | 5.40E-03 | 18697 |
| 64 | Parietal_Sup_R       | -0.427 | -0.786 | -0.067 | 0.183 | -2.328 | -0.017 | 1.99E-02 | 18607 | -5.443  | -9.032  | -1.854  | 1.831 | -2.972 | -0.022 | 2.96E-03 | 18697 |
| 65 | Parietal_Inf_L       | -0.280 | -0.810 | 0.250  | 0.270 | -1.037 | -0.008 | 3.00E-01 | 18607 | -14.018 | -19.314 | -8.722  | 2.702 | -5.188 | -0.038 | 2.14E-07 | 18697 |
| 66 | Parietal_Inf_R       | 0.012  | -0.331 | 0.355  | 0.175 | 0.068  | 0.001  | 9.45E-01 | 18607 | -7.966  | -11.399 | -4.534  | 1.751 | -4.550 | -0.033 | 5.41E-06 | 18697 |
| 67 | SupraMarginal_L      | 0.171  | -0.139 | 0.482  | 0.158 | 1.081  | 0.008  | 2.79E-01 | 18607 | -7.364  | -10.467 | -4.260  | 1.583 | -4.650 | -0.034 | 3.34E-06 | 18697 |
| 68 | SupraMarginal_R      | 0.249  | -0.190 | 0.688  | 0.224 | 1.112  | 0.008  | 2.66E-01 | 18607 | -10.059 | -14.452 | -5.665  | 2.241 | -4.488 | -0.033 | 7.24E-06 | 18697 |
| 69 | Angular_L            | -0.257 | -0.562 | 0.048  | 0.156 | -1.654 | -0.012 | 9.82E-02 | 18607 | -5.645  | -8.694  | -2.596  | 1.556 | -3.629 | -0.027 | 2.86E-04 | 18697 |
| 70 | Angular_R            | -0.229 | -0.638 | 0.180  | 0.209 | -1.098 | -0.008 | 2.72E-01 | 18607 | -8.723  | -12.813 | -4.634  | 2.086 | -4.181 | -0.031 | 2.92E-05 | 18697 |
| 71 | Precuneus_L          | -0.480 | -1.224 | 0.264  | 0.380 | -1.264 | -0.009 | 2.06E-01 | 18607 | -13.102 | -20.537 | -5.668  | 3.793 | -3.455 | -0.025 | 5.52E-04 | 18697 |
| 72 | Precuneus_R          | -0.630 | -1.292 | 0.033  | 0.338 | -1.863 | -0.014 | 6.24E-02 | 18607 | -8.930  | -15.553 | -2.308  | 3.379 | -2.643 | -0.019 | 8.22E-03 | 18697 |
| 73 | Paracentral_Lobule_L | -0.010 | -0.351 | 0.330  | 0.174 | -0.059 | 0.000  | 9.53E-01 | 18607 | -2.331  | -5.736  | 1.075   | 1.737 | -1.341 | -0.010 | 1.80E-01 | 18697 |
| 74 | Paracentral_Lobule_R | 0.011  | -0.232 | 0.255  | 0.124 | 0.092  | 0.001  | 9.27E-01 | 18607 | -1.870  | -4.310  | 0.569   | 1.245 | -1.503 | -0.011 | 1.33E-01 | 18697 |
| 75 | Caudate_L            | 0.076  | -0.196 | 0.348  | 0.139 | 0.549  | 0.004  | 5.83E-01 | 18607 | -3.992  | -6.710  | -1.274  | 1.387 | -2.879 | -0.021 | 4.00E-03 | 18697 |
| 76 | Caudate_R            | 0.217  | -0.091 | 0.525  | 0.157 | 1.383  | 0.010  | 1.67E-01 | 18607 | -3.921  | -6.999  | -0.843  | 1.570 | -2.497 | -0.018 | 1.25E-02 | 18697 |
| 77 | Putamen_L            | 0.157  | -0.256 | 0.569  | 0.210 | 0.746  | 0.005  | 4.56E-01 | 18607 | -6.595  | -10.723 | -2.466  | 2.106 | -3.131 | -0.023 | 1.75E-03 | 18697 |
| 78 | Putamen_R            | 0.283  | -0.138 | 0.703  | 0.214 | 1.319  | 0.010  | 1.87E-01 | 18607 | -7.216  | -11.420 | -3.011  | 2.145 | -3.364 | -0.025 | 7.70E-04 | 18697 |
| 79 | Pallidum_L           | -0.003 | -0.039 | 0.034  | 0.019 | -0.136 | -0.001 | 8.92E-01 | 18607 | -0.416  | -0.783  | -0.049  | 0.187 | -2.220 | -0.016 | 2.64E-02 | 18697 |
| 80 | Pallidum_R           | 0.013  | -0.028 | 0.053  | 0.021 | 0.618  | 0.005  | 5.37E-01 | 18607 | -0.638  | -1.041  | -0.235  | 0.206 | -3.104 | -0.023 | 1.91E-03 | 18697 |
| 83 | Heschl_L             | -0.001 | -0.075 | 0.074  | 0.038 | -0.022 | 0.000  | 9.82E-01 | 18607 | -2.050  | -2.795  | -1.306  | 0.380 | -5.400 | -0.039 | 6.75E-08 | 18697 |
| 84 | Heschl_R             | 0.046  | -0.038 | 0.129  | 0.042 | 1.076  | 0.008  | 2.82E-01 | 18607 | -2.298  | -3.130  | -1.467  | 0.424 | -5.417 | -0.040 | 6.12E-08 | 18697 |
| 85 | Temporal_Sup_L       | 0.374  | -0.164 | 0.911  | 0.274 | 1.363  | 0.010  | 1.73E-01 | 18607 | -15.028 | -20.398 | -9.657  | 2.740 | -5.484 | -0.040 | 4.20E-08 | 18697 |
| 86 | Temporal_Sup_R       | 0.149  | -0.446 | 0.743  | 0.303 | 0.491  | 0.004  | 6.24E-01 | 18607 | -18.266 | -24.205 | -12.326 | 3.030 | -6.028 | -0.044 | 1.70E-09 | 18697 |
| 87 | Temporal_Pole_Sup_L  | 0.142  | -0.112 | 0.396  | 0.130 | 1.094  | 0.008  | 2.74E-01 | 18607 | -3.776  | -6.320  | -1.231  | 1.298 | -2.908 | -0.021 | 3.64E-03 | 18697 |
| 88 | Temporal_Pole_Sup_R  | 0.242  | -0.025 | 0.510  | 0.137 | 1.774  | 0.013  | 7.61E-02 | 18607 | -3.673  | -6.352  | -0.994  | 1.367 | -2.687 | -0.020 | 7.22E-03 | 18697 |
| 89 | Temporal_Mid_L       | -0.596 | -1.492 | 0.299  | 0.457 | -1.305 | -0.010 | 1.92E-01 | 18607 | -22.603 | -31.555 | -13.651 | 4.567 | -4.949 | -0.036 | 7.53E-07 | 18697 |

|     |                     |        |        |        |       |        |        |          |       |         |         |        |       |        |        |          |       |
|-----|---------------------|--------|--------|--------|-------|--------|--------|----------|-------|---------|---------|--------|-------|--------|--------|----------|-------|
| 90  | Temporal_Mid_R      | -0.375 | -1.170 | 0.421  | 0.406 | -0.923 | -0.007 | 3.56E-01 | 18607 | -17.089 | -25.035 | -9.143 | 4.054 | -4.216 | -0.031 | 2.50E-05 | 18697 |
| 91  | Temporal_Pole_Mid_L | -0.012 | -0.225 | 0.202  | 0.109 | -0.107 | -0.001 | 9.15E-01 | 18607 | -1.540  | -3.680  | 0.599  | 1.091 | -1.411 | -0.010 | 1.58E-01 | 18697 |
| 92  | Temporal_Pole_Mid_R | 0.139  | -0.121 | 0.399  | 0.133 | 1.048  | 0.008  | 2.95E-01 | 18607 | -2.407  | -5.007  | 0.192  | 1.326 | -1.815 | -0.013 | 6.95E-02 | 18697 |
| 93  | Temporal_Inf_L      | -0.261 | -0.877 | 0.356  | 0.314 | -0.829 | -0.006 | 4.07E-01 | 18607 | -5.672  | -11.823 | 0.480  | 3.138 | -1.807 | -0.013 | 7.07E-02 | 18697 |
| 94  | Temporal_Inf_R      | -0.098 | -0.770 | 0.573  | 0.343 | -0.287 | -0.002 | 7.74E-01 | 18607 | -5.007  | -11.719 | 1.705  | 3.425 | -1.462 | -0.011 | 1.44E-01 | 18697 |
| 95  | Cerebellum_Crus1_L  | -0.645 | -1.376 | 0.085  | 0.373 | -1.731 | -0.013 | 8.35E-02 | 18607 | 3.672   | -3.643  | 10.987 | 3.732 | 0.984  | 0.007  | 3.25E-01 | 18697 |
| 96  | Cerebellum_Crus1_R  | -0.255 | -1.000 | 0.490  | 0.380 | -0.671 | -0.005 | 5.02E-01 | 18607 | -2.225  | -9.686  | 5.236  | 3.806 | -0.585 | -0.004 | 5.59E-01 | 18697 |
| 97  | Cerebellum_Crus2_L  | -0.374 | -0.954 | 0.206  | 0.296 | -1.264 | -0.009 | 2.06E-01 | 18607 | -3.713  | -9.515  | 2.090  | 2.960 | -1.254 | -0.009 | 2.10E-01 | 18697 |
| 98  | Cerebellum_Crus2_R  | -0.284 | -0.821 | 0.252  | 0.274 | -1.039 | -0.008 | 2.99E-01 | 18607 | -2.294  | -7.662  | 3.073  | 2.738 | -0.838 | -0.006 | 4.02E-01 | 18697 |
| 99  | Cerebellum_3_L      | -0.039 | -0.078 | 0.000  | 0.020 | -1.980 | -0.015 | 4.77E-02 | 18607 | 0.031   | -0.359  | 0.420  | 0.199 | 0.155  | 0.001  | 8.77E-01 | 18697 |
| 100 | Cerebellum_3_R      | -0.063 | -0.116 | -0.010 | 0.027 | -2.350 | -0.017 | 1.88E-02 | 18607 | -0.442  | -0.968  | 0.084  | 0.268 | -1.648 | -0.012 | 9.93E-02 | 18697 |
| 101 | Cerebellum_4_5_L    | -0.094 | -0.409 | 0.221  | 0.161 | -0.584 | -0.004 | 5.59E-01 | 18607 | 0.340   | -2.810  | 3.491  | 1.607 | 0.212  | 0.002  | 8.32E-01 | 18697 |
| 102 | Cerebellum_4_5_R    | -0.098 | -0.355 | 0.158  | 0.131 | -0.752 | -0.006 | 4.52E-01 | 18607 | -1.561  | -4.127  | 1.005  | 1.309 | -1.192 | -0.009 | 2.33E-01 | 18697 |
| 103 | Cerebellum_6_L      | -0.229 | -0.773 | 0.315  | 0.278 | -0.824 | -0.006 | 4.10E-01 | 18607 | 0.390   | -5.054  | 5.835  | 2.778 | 0.140  | 0.001  | 8.88E-01 | 18697 |
| 104 | Cerebellum_6_R      | -0.392 | -0.965 | 0.182  | 0.293 | -1.339 | -0.010 | 1.81E-01 | 18607 | -0.206  | -5.942  | 5.529  | 2.926 | -0.071 | -0.001 | 9.44E-01 | 18697 |
| 105 | Cerebellum_7b_L     | 0.021  | -0.156 | 0.199  | 0.090 | 0.236  | 0.002  | 8.13E-01 | 18607 | -0.617  | -2.390  | 1.157  | 0.905 | -0.682 | -0.005 | 4.95E-01 | 18697 |
| 106 | Cerebellum_7b_R     | -0.046 | -0.222 | 0.129  | 0.090 | -0.517 | -0.004 | 6.06E-01 | 18607 | -1.132  | -2.890  | 0.626  | 0.897 | -1.262 | -0.009 | 2.07E-01 | 18697 |
| 107 | Cerebellum_8_L      | 0.021  | -0.541 | 0.584  | 0.287 | 0.074  | 0.001  | 9.41E-01 | 18607 | 5.376   | -0.253  | 11.005 | 2.872 | 1.872  | 0.014  | 6.12E-02 | 18697 |
| 108 | Cerebellum_8_R      | 0.116  | -0.617 | 0.848  | 0.374 | 0.310  | 0.002  | 7.57E-01 | 18607 | 0.404   | -6.923  | 7.731  | 3.738 | 0.108  | 0.001  | 9.14E-01 | 18697 |
| 109 | Cerebellum_9_L      | -0.152 | -0.470 | 0.166  | 0.162 | -0.938 | -0.007 | 3.48E-01 | 18607 | 4.069   | 0.885   | 7.252  | 1.624 | 2.505  | 0.018  | 1.23E-02 | 18697 |
| 110 | Cerebellum_9_R      | -0.206 | -0.519 | 0.106  | 0.160 | -1.293 | -0.009 | 1.96E-01 | 18607 | 4.478   | 1.349   | 7.607  | 1.596 | 2.805  | 0.021  | 5.03E-03 | 18697 |
| 111 | Cerebellum_10_L     | 0.002  | -0.020 | 0.025  | 0.012 | 0.190  | 0.001  | 8.50E-01 | 18607 | 0.238   | 0.012   | 0.464  | 0.115 | 2.066  | 0.015  | 3.89E-02 | 18697 |
| 112 | Cerebellum_10_R     | 0.006  | -0.018 | 0.029  | 0.012 | 0.490  | 0.004  | 6.24E-01 | 18607 | 0.059   | -0.176  | 0.294  | 0.120 | 0.495  | 0.004  | 6.20E-01 | 18697 |
| 113 | Vermis_1_2          | -0.016 | -0.031 | -0.001 | 0.007 | -2.130 | -0.016 | 3.32E-02 | 18607 | -0.096  | -0.243  | 0.051  | 0.075 | -1.279 | -0.009 | 2.01E-01 | 18697 |
| 114 | Vermis_3            | -0.045 | -0.103 | 0.014  | 0.030 | -1.497 | -0.011 | 1.34E-01 | 18607 | -0.532  | -1.116  | 0.052  | 0.298 | -1.786 | -0.013 | 7.41E-02 | 18697 |
| 115 | Vermis_4_5          | -0.018 | -0.190 | 0.153  | 0.088 | -0.209 | -0.002 | 8.34E-01 | 18607 | -0.148  | -1.863  | 1.568  | 0.875 | -0.169 | -0.001 | 8.66E-01 | 18697 |
| 116 | Vermis_6            | -0.046 | -0.142 | 0.049  | 0.049 | -0.946 | -0.007 | 3.44E-01 | 18607 | 0.707   | -0.248  | 1.662  | 0.487 | 1.450  | 0.011  | 1.47E-01 | 18697 |
| 117 | Vermis_7            | 0.029  | -0.025 | 0.083  | 0.028 | 1.042  | 0.008  | 2.97E-01 | 18607 | 0.475   | -0.065  | 1.014  | 0.275 | 1.723  | 0.013  | 8.48E-02 | 18697 |
| 118 | Vermis_8            | 0.002  | -0.087 | 0.090  | 0.045 | 0.038  | 0.000  | 9.69E-01 | 18607 | 1.336   | 0.449   | 2.223  | 0.453 | 2.952  | 0.022  | 3.16E-03 | 18697 |
| 119 | Vermis_9            | -0.053 | -0.125 | 0.019  | 0.037 | -1.451 | -0.011 | 1.47E-01 | 18607 | 0.870   | 0.151   | 1.589  | 0.367 | 2.372  | 0.017  | 1.77E-02 | 18697 |
| 120 | Vermis_10           | -0.019 | -0.039 | 0.001  | 0.010 | -1.861 | -0.014 | 6.28E-02 | 18607 | 0.317   | 0.117   | 0.518  | 0.102 | 3.103  | 0.023  | 1.92E-03 | 18697 |
| 121 | Thal_AV_L           | 0.008  | 0.000  | 0.016  | 0.004 | 2.054  | 0.015  | 4.00E-02 | 18607 | -0.103  | -0.183  | -0.022 | 0.041 | -2.507 | -0.018 | 1.22E-02 | 18697 |
| 122 | Thal_AV_R           | 0.011  | 0.000  | 0.023  | 0.006 | 1.897  | 0.014  | 5.79E-02 | 18607 | -0.174  | -0.289  | -0.060 | 0.059 | -2.978 | -0.022 | 2.90E-03 | 18697 |
| 123 | Thal_LP_L           | 0.009  | 0.000  | 0.018  | 0.005 | 2.012  | 0.015  | 4.42E-02 | 18607 | -0.189  | -0.278  | -0.100 | 0.045 | -4.162 | -0.030 | 3.16E-05 | 18697 |
| 124 | Thal_LP_R           | 0.012  | 0.000  | 0.023  | 0.006 | 1.991  | 0.015  | 4.65E-02 | 18607 | -0.244  | -0.360  | -0.128 | 0.059 | -4.121 | -0.030 | 3.79E-05 | 18697 |
| 125 | Thal_VA_L           | -0.002 | -0.011 | 0.007  | 0.005 | -0.418 | -0.003 | 6.76E-01 | 18607 | -0.023  | -0.118  | 0.071  | 0.048 | -0.484 | -0.004 | 6.28E-01 | 18697 |
| 126 | Thal_VA_R           | 0.005  | -0.007 | 0.016  | 0.006 | 0.783  | 0.006  | 4.34E-01 | 18607 | -0.059  | -0.175  | 0.058  | 0.059 | -0.985 | -0.007 | 3.25E-01 | 18697 |
| 127 | Thal_VL_L           | 0.043  | 0.016  | 0.070  | 0.014 | 3.131  | 0.023  | 1.75E-03 | 18607 | -0.423  | -0.693  | -0.153 | 0.138 | -3.067 | -0.022 | 2.16E-03 | 18697 |
| 128 | Thal_VL_R           | 0.056  | 0.021  | 0.092  | 0.018 | 3.087  | 0.023  | 2.02E-03 | 18607 | -0.620  | -0.979  | -0.262 | 0.183 | -3.389 | -0.025 | 7.03E-04 | 18697 |
| 129 | Thal_VPL_L          | 0.007  | -0.025 | 0.039  | 0.016 | 0.411  | 0.003  | 6.81E-01 | 18607 | -0.673  | -0.995  | -0.351 | 0.164 | -4.100 | -0.030 | 4.14E-05 | 18697 |
| 130 | Thal_VPL_R          | -0.001 | -0.034 | 0.033  | 0.017 | -0.034 | 0.000  | 9.73E-01 | 18607 | -0.729  | -1.067  | -0.390 | 0.173 | -4.222 | -0.031 | 2.44E-05 | 18697 |
| 131 | Thal_IL_L           | 0.008  | -0.006 | 0.022  | 0.007 | 1.069  | 0.008  | 2.85E-01 | 18607 | -0.351  | -0.490  | -0.211 | 0.071 | -4.937 | -0.036 | 7.98E-07 | 18697 |
| 132 | Thal_IL_R           | 0.013  | -0.003 | 0.029  | 0.008 | 1.593  | 0.012  | 1.11E-01 | 18607 | -0.421  | -0.579  | -0.263 | 0.081 | -5.231 | -0.038 | 1.70E-07 | 18697 |
| 133 | Thal_Re_L           | 0.000  | 0.000  | 0.000  | 0.000 | -0.063 | 0.000  | 9.50E-01 | 18607 | 0.000   | -0.001  | 0.000  | 0.000 | -1.237 | -0.009 | 2.16E-01 | 18697 |
| 134 | Thal_Re_R           | 0.000  | 0.000  | 0.001  | 0.000 | 1.109  | 0.008  | 2.67E-01 | 18607 | -0.006  | -0.011  | -0.001 | 0.002 | -2.462 | -0.018 | 1.38E-02 | 18697 |
| 135 | Thal_MDm_L          | 0.097  | -0.006 | 0.200  | 0.053 | 1.852  | 0.014  | 6.41E-02 | 18607 | -3.011  | -4.041  | -1.980 | 0.526 | -5.727 | -0.042 | 1.04E-08 | 18697 |
| 136 | Thal_MDm_R          | 0.104  | -0.016 | 0.223  | 0.061 | 1.699  | 0.012  | 8.94E-02 | 18607 | -3.364  | -4.562  | -2.167 | 0.611 | -5.508 | -0.040 | 3.68E-08 | 18697 |
| 137 | Thal_MDI_L          | 0.026  | 0.009  | 0.044  | 0.009 | 2.903  | 0.021  | 3.70E-03 | 18607 | -0.534  | -0.712  | -0.355 | 0.091 | -5.862 | -0.043 | 4.65E-09 | 18697 |

|     |            |        |        |       |       |        |        |          |       |        |        |        |       |        |        |          |       |
|-----|------------|--------|--------|-------|-------|--------|--------|----------|-------|--------|--------|--------|-------|--------|--------|----------|-------|
| 138 | Thal_MDI_R | 0.022  | 0.002  | 0.043 | 0.010 | 2.176  | 0.016  | 2.96E-02 | 18607 | -0.584 | -0.787 | -0.382 | 0.103 | -5.649 | -0.041 | 1.63E-08 | 18697 |
| 139 | Thal_LGN_L | 0.002  | -0.001 | 0.004 | 0.001 | 1.250  | 0.009  | 2.11E-01 | 18607 | -0.043 | -0.070 | -0.016 | 0.014 | -3.130 | -0.023 | 1.75E-03 | 18697 |
| 140 | Thal_LGN_R | 0.002  | -0.004 | 0.008 | 0.003 | 0.684  | 0.005  | 4.94E-01 | 18607 | -0.119 | -0.176 | -0.061 | 0.029 | -4.033 | -0.029 | 5.52E-05 | 18697 |
| 141 | Thal_MGN_L | -0.001 | -0.006 | 0.003 | 0.002 | -0.602 | -0.004 | 5.47E-01 | 18607 | -0.111 | -0.159 | -0.063 | 0.025 | -4.501 | -0.033 | 6.79E-06 | 18697 |
| 142 | Thal_MGN_R | -0.002 | -0.007 | 0.004 | 0.003 | -0.600 | -0.004 | 5.48E-01 | 18607 | -0.134 | -0.187 | -0.082 | 0.027 | -5.010 | -0.037 | 5.50E-07 | 18697 |
| 143 | Thal_PuA_L | -0.002 | -0.008 | 0.003 | 0.003 | -0.856 | -0.006 | 3.92E-01 | 18607 | -0.148 | -0.206 | -0.091 | 0.029 | -5.094 | -0.037 | 3.54E-07 | 18697 |
| 144 | Thal_PuA_R | -0.003 | -0.015 | 0.009 | 0.006 | -0.500 | -0.004 | 6.17E-01 | 18607 | -0.332 | -0.451 | -0.214 | 0.061 | -5.486 | -0.040 | 4.16E-08 | 18697 |
| 145 | Thal_PuM_L | -0.003 | -0.116 | 0.110 | 0.058 | -0.052 | 0.000  | 9.59E-01 | 18607 | -3.384 | -4.519 | -2.250 | 0.579 | -5.846 | -0.043 | 5.11E-09 | 18697 |
| 146 | Thal_PuM_R | 0.001  | -0.140 | 0.142 | 0.072 | 0.012  | 0.000  | 9.90E-01 | 18607 | -4.120 | -5.534 | -2.707 | 0.721 | -5.713 | -0.042 | 1.13E-08 | 18697 |
| 147 | Thal_PuL_L | 0.004  | -0.017 | 0.025 | 0.011 | 0.375  | 0.003  | 7.08E-01 | 18607 | -0.610 | -0.817 | -0.403 | 0.106 | -5.777 | -0.042 | 7.73E-09 | 18697 |
| 148 | Thal_PuL_R | 0.005  | -0.028 | 0.038 | 0.017 | 0.300  | 0.002  | 7.64E-01 | 18607 | -0.942 | -1.271 | -0.613 | 0.168 | -5.611 | -0.041 | 2.04E-08 | 18697 |
| 149 | Thal_PuL_L | -0.001 | -0.007 | 0.004 | 0.003 | -0.446 | -0.003 | 6.55E-01 | 18607 | -0.125 | -0.181 | -0.068 | 0.029 | -4.342 | -0.032 | 1.42E-05 | 18697 |
| 150 | Thal_PuL_R | -0.004 | -0.012 | 0.003 | 0.004 | -1.073 | -0.008 | 2.83E-01 | 18607 | -0.121 | -0.195 | -0.046 | 0.038 | -3.175 | -0.023 | 1.50E-03 | 18697 |
| 151 | ACC_sub_L  | 0.008  | -0.056 | 0.073 | 0.033 | 0.256  | 0.002  | 7.98E-01 | 18607 | -1.131 | -1.781 | -0.482 | 0.331 | -3.415 | -0.025 | 6.40E-04 | 18697 |
| 152 | ACC_sub_R  | -0.008 | -0.069 | 0.052 | 0.031 | -0.266 | -0.002 | 7.90E-01 | 18607 | -0.749 | -1.356 | -0.142 | 0.310 | -2.418 | -0.018 | 1.56E-02 | 18697 |
| 153 | ACC_pre_L  | 0.120  | -0.046 | 0.287 | 0.085 | 1.415  | 0.010  | 1.57E-01 | 18607 | -3.238 | -4.902 | -1.573 | 0.849 | -3.813 | -0.028 | 1.38E-04 | 18697 |
| 154 | ACC_pre_R  | -0.038 | -0.198 | 0.122 | 0.082 | -0.467 | -0.003 | 6.41E-01 | 18607 | -3.459 | -5.063 | -1.856 | 0.818 | -4.229 | -0.031 | 2.36E-05 | 18697 |
| 155 | ACC_sup_L  | 0.140  | -0.041 | 0.321 | 0.092 | 1.516  | 0.011  | 1.29E-01 | 18607 | -4.327 | -6.136 | -2.519 | 0.923 | -4.691 | -0.034 | 2.74E-06 | 18697 |
| 156 | ACC_sup_R  | 0.030  | -0.157 | 0.218 | 0.096 | 0.316  | 0.002  | 7.52E-01 | 18607 | -4.159 | -6.033 | -2.285 | 0.956 | -4.349 | -0.032 | 1.37E-05 | 18697 |
| 157 | N_Acc_L    | 0.001  | -0.053 | 0.056 | 0.028 | 0.054  | 0.000  | 9.57E-01 | 18607 | -0.879 | -1.424 | -0.335 | 0.278 | -3.168 | -0.023 | 1.54E-03 | 18697 |
| 158 | N_Acc_R    | 0.025  | -0.022 | 0.072 | 0.024 | 1.039  | 0.008  | 2.99E-01 | 18607 | -0.795 | -1.266 | -0.324 | 0.240 | -3.309 | -0.024 | 9.38E-04 | 18697 |
| 159 | VTA_L      | 0.001  | -0.001 | 0.003 | 0.001 | 0.962  | 0.007  | 3.36E-01 | 18607 | -0.007 | -0.026 | 0.012  | 0.010 | -0.695 | -0.005 | 4.87E-01 | 18697 |
| 160 | VTA_R      | 0.001  | -0.001 | 0.003 | 0.001 | 1.232  | 0.009  | 2.18E-01 | 18607 | -0.012 | -0.029 | 0.005  | 0.009 | -1.377 | -0.010 | 1.69E-01 | 18697 |
| 161 | SN_pc_L    | 0.000  | -0.003 | 0.003 | 0.002 | 0.170  | 0.001  | 8.65E-01 | 18607 | -0.033 | -0.064 | -0.002 | 0.016 | -2.094 | -0.015 | 3.63E-02 | 18697 |
| 162 | SN_pc_R    | 0.001  | -0.003 | 0.005 | 0.002 | 0.315  | 0.002  | 7.53E-01 | 18607 | -0.051 | -0.091 | -0.010 | 0.021 | -2.462 | -0.018 | 1.38E-02 | 18697 |
| 163 | SN_pr_L    | 0.001  | -0.003 | 0.005 | 0.002 | 0.439  | 0.003  | 6.61E-01 | 18607 | -0.036 | -0.077 | 0.006  | 0.021 | -1.677 | -0.012 | 9.35E-02 | 18697 |
| 164 | SN_pr_R    | 0.000  | -0.004 | 0.005 | 0.002 | 0.146  | 0.001  | 8.84E-01 | 18607 | -0.031 | -0.078 | 0.016  | 0.024 | -1.289 | -0.009 | 1.97E-01 | 18697 |
| 165 | Red_N_L    | 0.002  | -0.004 | 0.007 | 0.003 | 0.617  | 0.005  | 5.37E-01 | 18607 | -0.082 | -0.134 | -0.031 | 0.026 | -3.119 | -0.023 | 1.82E-03 | 18697 |
| 166 | Red_N_R    | 0.002  | -0.003 | 0.008 | 0.003 | 0.782  | 0.006  | 4.34E-01 | 18607 | -0.072 | -0.128 | -0.016 | 0.029 | -2.507 | -0.018 | 1.22E-02 | 18697 |
| 167 | LC_L       | -0.001 | -0.003 | 0.001 | 0.001 | -0.748 | -0.005 | 4.54E-01 | 18607 | -0.011 | -0.030 | 0.008  | 0.010 | -1.123 | -0.008 | 2.62E-01 | 18697 |
| 168 | LC_R       | 0.000  | -0.002 | 0.002 | 0.001 | -0.371 | -0.003 | 7.11E-01 | 18607 | -0.011 | -0.032 | 0.010  | 0.011 | -1.012 | -0.007 | 3.11E-01 | 18697 |
| 169 | Raphe_D    | 0.001  | -0.006 | 0.009 | 0.004 | 0.320  | 0.002  | 7.49E-01 | 18607 | -0.123 | -0.198 | -0.049 | 0.038 | -3.238 | -0.024 | 1.21E-03 | 18697 |
| 170 | Raphe_M    | 0.001  | -0.001 | 0.003 | 0.001 | 0.720  | 0.005  | 4.72E-01 | 18607 | -0.017 | -0.040 | 0.005  | 0.012 | -1.503 | -0.011 | 1.33E-01 | 18697 |

Oily fish intake

Cheese intake

| Number | AAL 3 region        | beta   | 95%CI l  | 95%CI h | se     | t      | r      | p        | df.e  | beta    | 95%CI l  | 95%CI h | se     | t      | r      | p        | df.e  |
|--------|---------------------|--------|----------|---------|--------|--------|--------|----------|-------|---------|----------|---------|--------|--------|--------|----------|-------|
| 0      | Total brain         | -3.612 | -150.408 | 143.185 | 74.893 | -0.048 | 0.000  | 9.62E-01 | 18725 | -49.240 | -173.822 | 75.342  | 63.559 | -0.775 | -0.006 | 4.39E-01 | 18410 |
| 1      | Precentral_L        | -1.180 | -6.346   | 3.985   | 2.635  | -0.448 | -0.003 | 6.54E-01 | 18725 | -5.890  | -10.269  | -1.512  | 2.234  | -2.637 | -0.019 | 8.37E-03 | 18410 |
| 2      | Precentral_R        | -0.714 | -5.447   | 4.019   | 2.415  | -0.296 | -0.002 | 7.67E-01 | 18725 | -4.187  | -8.199   | -0.175  | 2.047  | -2.046 | -0.015 | 4.08E-02 | 18410 |
| 3      | Frontal_Sup_2_L     | 3.072  | -2.380   | 8.524   | 2.782  | 1.105  | 0.008  | 2.69E-01 | 18725 | 2.129   | -2.497   | 6.755   | 2.360  | 0.902  | 0.007  | 3.67E-01 | 18410 |
| 4      | Frontal_Sup_2_R     | -0.167 | -6.177   | 5.843   | 3.066  | -0.055 | 0.000  | 9.56E-01 | 18725 | 1.036   | -4.068   | 6.140   | 2.604  | 0.398  | 0.003  | 6.91E-01 | 18410 |
| 5      | Frontal_Mid_2_L     | -2.088 | -7.814   | 3.639   | 2.922  | -0.715 | -0.005 | 4.75E-01 | 18725 | 2.408   | -2.454   | 7.270   | 2.481  | 0.971  | 0.007  | 3.32E-01 | 18410 |
| 6      | Frontal_Mid_2_R     | -4.439 | -10.919  | 2.042   | 3.306  | -1.343 | -0.010 | 1.79E-01 | 18725 | 2.333   | -3.165   | 7.830   | 2.805  | 0.832  | 0.006  | 4.06E-01 | 18410 |
| 7      | Frontal_Inf_Oper_L  | -0.618 | -2.310   | 1.074   | 0.863  | -0.715 | -0.005 | 4.74E-01 | 18725 | 1.067   | -0.369   | 2.503   | 0.733  | 1.457  | 0.011  | 1.45E-01 | 18410 |
| 8      | Frontal_Inf_Oper_R  | -0.950 | -3.072   | 1.171   | 1.082  | -0.878 | -0.006 | 3.80E-01 | 18725 | 0.474   | -1.327   | 2.276   | 0.919  | 0.516  | 0.004  | 6.06E-01 | 18410 |
| 9      | Frontal_Inf_Tri_L   | -1.081 | -4.675   | 2.512   | 1.833  | -0.590 | -0.004 | 5.55E-01 | 18725 | 4.286   | 1.236    | 7.335   | 1.556  | 2.755  | 0.020  | 5.88E-02 | 18410 |
| 10     | Frontal_Inf_Tri_R   | 0.166  | -2.656   | 2.988   | 1.440  | 0.115  | 0.001  | 9.08E-01 | 18725 | 2.038   | -0.360   | 4.435   | 1.223  | 1.666  | 0.012  | 9.57E-02 | 18410 |
| 11     | Frontal_Inf_Orb_2_L | 0.271  | -0.803   | 1.345   | 0.548  | 0.494  | 0.004  | 6.21E-01 | 18725 | 1.867   | 0.954    | 2.779   | 0.466  | 4.010  | 0.030  | 6.10E-05 | 18410 |
| 12     | Frontal_Inf_Orb_2_R | -0.017 | -1.140   | 1.107   | 0.573  | -0.029 | 0.000  | 9.77E-01 | 18725 | 2.326   | 1.372    | 3.280   | 0.487  | 4.780  | 0.035  | 1.76E-06 | 18410 |

|    |                      |        |        |        |       |        |        |          |       |         |         |        |       |        |        |          |       |
|----|----------------------|--------|--------|--------|-------|--------|--------|----------|-------|---------|---------|--------|-------|--------|--------|----------|-------|
| 13 | Rolandic_Oper_L      | 1.660  | 0.036  | 3.285  | 0.829 | 2.003  | 0.015  | 4.52E-02 | 18725 | 0.382   | -0.998  | 1.762  | 0.704 | 0.543  | 0.004  | 5.87E-01 | 18410 |
| 14 | Rolandic_Oper_R      | 2.288  | -0.038 | 4.613  | 1.186 | 1.928  | 0.014  | 5.38E-02 | 18725 | -1.090  | -3.066  | 0.885  | 1.008 | -1.082 | -0.008 | 2.79E-01 | 18410 |
| 15 | Supp_Motor_Area_L    | -1.890 | -5.751 | 1.972  | 1.970 | -0.959 | -0.007 | 3.37E-01 | 18725 | -4.312  | -7.589  | -1.036 | 1.672 | -2.579 | -0.019 | 9.90E-03 | 18410 |
| 16 | Supp_Motor_Area_R    | -1.633 | -5.901 | 2.635  | 2.178 | -0.750 | -0.005 | 4.53E-01 | 18725 | -3.661  | -7.284  | -0.038 | 1.848 | -1.981 | -0.015 | 4.76E-02 | 18410 |
| 17 | Olfactory_L          | 0.343  | -0.231 | 0.917  | 0.293 | 1.171  | 0.009  | 2.42E-01 | 18725 | -0.045  | -0.533  | 0.442  | 0.249 | -0.182 | -0.001 | 8.56E-01 | 18410 |
| 18 | Olfactory_R          | 0.003  | -0.572 | 0.579  | 0.294 | 0.011  | 0.000  | 9.91E-01 | 18725 | -0.091  | -0.579  | 0.398  | 0.249 | -0.364 | -0.003 | 7.16E-01 | 18410 |
| 19 | Frontal_Sup_Medial_L | -2.178 | -5.797 | 1.442  | 1.847 | -1.179 | -0.009 | 2.38E-01 | 18725 | 2.776   | -0.298  | 5.850  | 1.568 | 1.770  | 0.013  | 7.67E-02 | 18410 |
| 20 | Frontal_Sup_Medial_R | -0.979 | -3.614 | 1.656  | 1.344 | -0.728 | -0.005 | 4.66E-01 | 18725 | 0.683   | -1.553  | 2.919  | 1.141 | 0.599  | 0.004  | 5.49E-01 | 18410 |
| 21 | Frontal_Med_Orb_L    | -0.377 | -1.730 | 0.976  | 0.690 | -0.546 | -0.004 | 5.85E-01 | 18725 | 1.013   | -0.135  | 2.162  | 0.586 | 1.729  | 0.013  | 8.38E-02 | 18410 |
| 22 | Frontal_Med_Orb_R    | 0.673  | -0.989 | 2.336  | 0.848 | 0.794  | 0.006  | 4.27E-01 | 18725 | 1.358   | -0.054  | 2.769  | 0.720 | 1.885  | 0.014  | 5.94E-02 | 18410 |
| 23 | Rectus_L             | 0.330  | -1.070 | 1.730  | 0.714 | 0.462  | 0.003  | 6.44E-01 | 18725 | 0.656   | -0.532  | 1.845  | 0.606 | 1.082  | 0.008  | 2.79E-01 | 18410 |
| 24 | Rectus_R             | 0.942  | -0.353 | 2.237  | 0.661 | 1.426  | 0.010  | 1.54E-01 | 18725 | 0.640   | -0.460  | 1.739  | 0.561 | 1.140  | 0.008  | 2.54E-01 | 18410 |
| 25 | OFCmed_L             | 0.076  | -0.735 | 0.888  | 0.414 | 0.185  | 0.001  | 8.54E-01 | 18725 | 0.062   | -0.627  | 0.752  | 0.352 | 0.178  | 0.001  | 8.59E-01 | 18410 |
| 26 | OFCmed_R             | 0.509  | -0.436 | 1.454  | 0.482 | 1.055  | 0.008  | 2.91E-01 | 18725 | 0.492   | -0.311  | 1.295  | 0.410 | 1.201  | 0.009  | 2.30E-01 | 18410 |
| 27 | OFCant_L             | -0.321 | -1.259 | 0.617  | 0.479 | -0.671 | -0.005 | 5.02E-01 | 18725 | -0.552  | -1.349  | 0.245  | 0.407 | -1.357 | -0.010 | 1.75E-01 | 18410 |
| 28 | OFCant_R             | -0.653 | -1.893 | 0.586  | 0.632 | -1.033 | -0.008 | 3.01E-01 | 18725 | 0.817   | -0.236  | 1.870  | 0.537 | 1.521  | 0.011  | 1.28E-01 | 18410 |
| 29 | OFCpost_L            | 0.447  | -0.728 | 1.621  | 0.599 | 0.745  | 0.005  | 4.56E-01 | 18725 | 0.244   | -0.754  | 1.242  | 0.509 | 0.480  | 0.004  | 6.31E-01 | 18410 |
| 30 | OFCpost_R            | -0.422 | -1.507 | 0.664  | 0.554 | -0.761 | -0.006 | 4.47E-01 | 18725 | 0.594   | -0.327  | 1.515  | 0.470 | 1.264  | 0.009  | 2.06E-01 | 18410 |
| 31 | OFClat_L             | 0.004  | -0.392 | 0.401  | 0.202 | 0.022  | 0.000  | 9.83E-01 | 18725 | 0.517   | 0.180   | 0.853  | 0.172 | 3.009  | 0.022  | 2.63E-03 | 18410 |
| 32 | OFClat_R             | -0.254 | -0.589 | 0.081  | 0.171 | -1.486 | -0.011 | 1.37E-01 | 18725 | 0.777   | 0.492   | 1.061  | 0.145 | 5.358  | 0.039  | 8.52E-08 | 18410 |
| 33 | Insula_L             | 0.752  | -2.880 | 4.384  | 1.853 | 0.406  | 0.003  | 6.85E-01 | 18725 | 2.078   | -1.006  | 5.161  | 1.573 | 1.321  | 0.010  | 1.87E-01 | 18410 |
| 34 | Insula_R             | 0.501  | -3.038 | 4.040  | 1.806 | 0.277  | 0.002  | 7.81E-01 | 18725 | 0.935   | -2.069  | 3.939  | 1.533 | 0.610  | 0.004  | 5.42E-01 | 18410 |
| 37 | Cingulate_Mid_L      | -2.244 | -5.314 | 0.826  | 1.566 | -1.433 | -0.010 | 1.52E-01 | 18725 | -0.526  | -3.134  | 2.081  | 1.330 | -0.396 | -0.003 | 6.92E-01 | 18410 |
| 38 | Cingulate_Mid_R      | -1.738 | -5.013 | 1.536  | 1.671 | -1.041 | -0.008 | 2.98E-01 | 18725 | -1.617  | -4.397  | 1.162  | 1.418 | -1.140 | -0.008 | 2.54E-01 | 18410 |
| 39 | Cingulate_Post_L     | -0.823 | -1.761 | 0.115  | 0.479 | -1.719 | -0.013 | 8.56E-02 | 18725 | -1.021  | -1.817  | -0.225 | 0.406 | -2.514 | -0.019 | 1.20E-02 | 18410 |
| 40 | Cingulate_Post_R     | -0.356 | -0.876 | 0.164  | 0.265 | -1.341 | -0.010 | 1.80E-01 | 18725 | -0.774  | -1.216  | -0.333 | 0.225 | -3.439 | -0.025 | 5.86E-04 | 18410 |
| 41 | Hippocampus_L        | 1.549  | 0.032  | 3.066  | 0.774 | 2.001  | 0.015  | 4.54E-02 | 18725 | -0.154  | -1.444  | 1.135  | 0.658 | -0.235 | -0.002 | 8.15E-01 | 18410 |
| 42 | Hippocampus_R        | 1.892  | 0.319  | 3.464  | 0.802 | 2.357  | 0.017  | 1.84E-02 | 18725 | 0.163   | -1.175  | 1.501  | 0.682 | 0.239  | 0.002  | 8.11E-01 | 18410 |
| 43 | ParaHippocampal_L    | 0.521  | -0.827 | 1.869  | 0.688 | 0.758  | 0.006  | 4.49E-01 | 18725 | 0.241   | -0.904  | 1.387  | 0.584 | 0.413  | 0.003  | 6.79E-01 | 18410 |
| 44 | ParaHippocampal_R    | 1.074  | -0.627 | 2.775  | 0.868 | 1.238  | 0.009  | 2.16E-01 | 18725 | 0.792   | -0.654  | 2.237  | 0.737 | 1.074  | 0.008  | 2.83E-01 | 18410 |
| 45 | Amygdala_L           | -0.396 | -0.920 | 0.128  | 0.267 | -1.480 | -0.011 | 1.39E-01 | 18725 | 0.252   | -0.192  | 0.697  | 0.227 | 1.112  | 0.008  | 2.66E-01 | 18410 |
| 46 | Amygdala_R           | -0.202 | -0.738 | 0.334  | 0.273 | -0.739 | -0.005 | 4.60E-01 | 18725 | 0.194   | -0.261  | 0.649  | 0.232 | 0.835  | 0.006  | 4.04E-01 | 18410 |
| 47 | Calcarine_L          | 2.203  | -2.796 | 7.202  | 2.550 | 0.864  | 0.006  | 3.88E-01 | 18725 | -12.034 | -16.272 | -7.796 | 2.162 | -5.565 | -0.041 | 2.65E-08 | 18410 |
| 48 | Calcarine_R          | 1.692  | -2.485 | 5.869  | 2.131 | 0.794  | 0.006  | 4.27E-01 | 18725 | -9.885  | -13.427 | -6.344 | 1.807 | -5.471 | -0.040 | 4.54E-08 | 18410 |
| 49 | Cuneus_L             | 1.368  | -1.768 | 4.504  | 1.600 | 0.855  | 0.006  | 3.92E-01 | 18725 | -5.914  | -8.574  | -3.253 | 1.357 | -4.357 | -0.032 | 1.33E-05 | 18410 |
| 50 | Cuneus_R             | 0.212  | -2.187 | 2.612  | 1.224 | 0.174  | 0.001  | 8.62E-01 | 18725 | -5.287  | -7.323  | -3.251 | 1.039 | -5.090 | -0.037 | 3.61E-07 | 18410 |
| 51 | Lingual_L            | 0.703  | -2.303 | 3.709  | 1.534 | 0.459  | 0.003  | 6.47E-01 | 18725 | -4.511  | -7.065  | -1.957 | 1.303 | -3.463 | -0.026 | 5.36E-04 | 18410 |
| 52 | Lingual_R            | 0.667  | -2.483 | 3.817  | 1.607 | 0.415  | 0.003  | 6.78E-01 | 18725 | -3.761  | -6.437  | -1.085 | 1.365 | -2.755 | -0.020 | 5.87E-03 | 18410 |
| 53 | Occipital_Sup_L      | 0.660  | -1.407 | 2.727  | 1.054 | 0.626  | 0.005  | 5.31E-01 | 18725 | -1.880  | -3.636  | -0.124 | 0.896 | -2.099 | -0.015 | 3.58E-02 | 18410 |
| 54 | Occipital_Sup_R      | -0.228 | -2.469 | 2.013  | 1.143 | -0.200 | -0.001 | 8.42E-01 | 18725 | -1.819  | -3.722  | 0.085  | 0.971 | -1.873 | -0.014 | 6.11E-02 | 18410 |
| 55 | Occipital_Mid_L      | 0.888  | -3.957 | 5.733  | 2.472 | 0.359  | 0.003  | 7.19E-01 | 18725 | -5.753  | -9.865  | -1.642 | 2.098 | -2.743 | -0.020 | 6.10E-03 | 18410 |
| 56 | Occipital_Mid_R      | -2.427 | -5.797 | 0.944  | 1.720 | -1.411 | -0.010 | 1.58E-01 | 18725 | -3.686  | -6.547  | -0.825 | 1.460 | -2.525 | -0.019 | 1.16E-02 | 18410 |
| 57 | Occipital_Inf_L      | 0.795  | -0.813 | 2.403  | 0.820 | 0.969  | 0.007  | 3.32E-01 | 18725 | -3.000  | -4.365  | -1.635 | 0.696 | -4.307 | -0.032 | 1.66E-05 | 18410 |
| 58 | Occipital_Inf_R      | -3.225 | -5.082 | -1.367 | 0.947 | -3.403 | -0.025 | 6.67E-04 | 18725 | -4.719  | -6.293  | -3.144 | 0.803 | -5.873 | -0.043 | 4.35E-09 | 18410 |
| 59 | Fusiform_L           | 1.160  | -2.360 | 4.679  | 1.796 | 0.646  | 0.005  | 5.18E-01 | 18725 | -0.883  | -3.871  | 2.105  | 1.524 | -0.579 | -0.004 | 5.63E-01 | 18410 |
| 60 | Fusiform_R           | 2.524  | -1.347 | 6.394  | 1.974 | 1.278  | 0.009  | 2.01E-01 | 18725 | 0.389   | -2.899  | 3.677  | 1.677 | 0.232  | 0.002  | 8.17E-01 | 18410 |
| 61 | Postcentral_L        | 1.889  | -3.406 | 7.184  | 2.702 | 0.699  | 0.005  | 4.84E-01 | 18725 | 3.805   | -0.687  | 8.298  | 2.292 | 1.660  | 0.012  | 9.69E-02 | 18410 |
| 62 | Postcentral_R        | 4.110  | -1.317 | 9.536  | 2.769 | 1.484  | 0.011  | 1.38E-01 | 18725 | 2.459   | -2.150  | 7.067  | 2.351 | 1.046  | 0.008  | 2.96E-01 | 18410 |

|     |                     |        |        |        |       |        |        |          |       |        |         |        |       |        |        |          |       |
|-----|---------------------|--------|--------|--------|-------|--------|--------|----------|-------|--------|---------|--------|-------|--------|--------|----------|-------|
| 63  | Parietal_Sup_L      | -3.187 | -6.237 | -0.137 | 1.556 | -2.048 | -0.015 | 4.06E-02 | 18725 | -3.600 | -6.191  | -1.010 | 1.322 | -2.724 | -0.020 | 6.45E-03 | 18410 |
| 64  | Parietal_Sup_R      | -1.807 | -4.513 | 0.899  | 1.380 | -1.309 | -0.010 | 1.91E-01 | 18725 | -4.784 | -7.079  | -2.488 | 1.171 | -4.084 | -0.030 | 4.44E-05 | 18410 |
| 65  | Parietal_Inf_L      | -1.990 | -5.985 | 2.004  | 2.038 | -0.977 | -0.007 | 3.29E-01 | 18725 | -0.522 | -3.912  | 2.869  | 1.730 | -0.302 | -0.002 | 7.63E-01 | 18410 |
| 66  | Parietal_Inf_R      | -1.324 | -3.912 | 1.263  | 1.320 | -1.003 | -0.007 | 3.16E-01 | 18725 | -1.669 | -3.862  | 0.525  | 1.119 | -1.491 | -0.011 | 1.36E-01 | 18410 |
| 67  | SupraMarginal_L     | 0.420  | -1.921 | 2.761  | 1.194 | 0.351  | 0.003  | 7.25E-01 | 18725 | 1.479  | -0.508  | 3.467  | 1.014 | 1.459  | 0.011  | 1.45E-01 | 18410 |
| 68  | SupraMarginal_R     | -0.608 | -3.920 | 2.704  | 1.690 | -0.360 | -0.003 | 7.19E-01 | 18725 | 2.360  | -0.452  | 5.172  | 1.435 | 1.645  | 0.012  | 1.00E-01 | 18410 |
| 69  | Angular_L           | 1.143  | -1.155 | 3.440  | 1.172 | 0.975  | 0.007  | 3.30E-01 | 18725 | -1.337 | -3.287  | 0.613  | 0.995 | -1.344 | -0.010 | 1.79E-01 | 18410 |
| 70  | Angular_R           | 0.754  | -2.329 | 3.838  | 1.573 | 0.480  | 0.004  | 6.32E-01 | 18725 | -2.280 | -4.900  | 0.340  | 1.337 | -1.706 | -0.013 | 8.81E-02 | 18410 |
| 71  | Precuneus_L         | -2.128 | -7.731 | 3.475  | 2.858 | -0.745 | -0.005 | 4.57E-01 | 18725 | -6.370 | -11.124 | -1.615 | 2.426 | -2.626 | -0.019 | 8.65E-03 | 18410 |
| 72  | Precuneus_R         | -3.935 | -8.926 | 1.057  | 2.547 | -1.545 | -0.011 | 1.22E-01 | 18725 | -8.197 | -12.435 | -3.960 | 2.162 | -3.792 | -0.028 | 1.50E-04 | 18410 |
| 73  | Paracentra_Lobule_L | -0.455 | -3.021 | 2.110  | 1.309 | -0.348 | -0.003 | 7.28E-01 | 18725 | -4.074 | -6.250  | -1.897 | 1.110 | -3.669 | -0.027 | 2.44E-04 | 18410 |
| 74  | Paracentra_Lobule_R | -1.051 | -2.888 | 0.786  | 0.937 | -1.121 | -0.008 | 2.62E-01 | 18725 | -1.856 | -3.415  | -0.296 | 0.796 | -2.332 | -0.017 | 1.97E-02 | 18410 |
| 75  | Caudate_L           | -0.480 | -2.529 | 1.568  | 1.045 | -0.460 | -0.003 | 6.46E-01 | 18725 | 0.264  | -1.474  | 2.003  | 0.887 | 0.298  | 0.002  | 7.66E-01 | 18410 |
| 76  | Caudate_R           | -0.698 | -3.017 | 1.621  | 1.183 | -0.590 | -0.004 | 5.55E-01 | 18725 | 0.146  | -1.820  | 2.111  | 1.003 | 0.145  | 0.001  | 8.85E-01 | 18410 |
| 77  | Putamen_L           | -2.881 | -5.993 | 0.231  | 1.588 | -1.815 | -0.013 | 6.96E-02 | 18725 | 0.342  | -2.298  | 2.982  | 1.347 | 0.254  | 0.002  | 8.00E-01 | 18410 |
| 78  | Putamen_R           | -3.318 | -6.488 | -0.149 | 1.617 | -2.052 | -0.015 | 4.02E-02 | 18725 | -0.059 | -2.748  | 2.631  | 1.372 | -0.043 | 0.000  | 9.66E-01 | 18410 |
| 79  | Pallidum_L          | -0.255 | -0.531 | 0.022  | 0.141 | -1.806 | -0.013 | 7.10E-02 | 18725 | 0.068  | -0.167  | 0.303  | 0.120 | 0.565  | 0.004  | 5.72E-01 | 18410 |
| 80  | Pallidum_R          | -0.259 | -0.562 | 0.045  | 0.155 | -1.671 | -0.012 | 9.48E-02 | 18725 | -0.038 | -0.295  | 0.220  | 0.132 | -0.286 | -0.002 | 7.75E-01 | 18410 |
| 83  | Heschl_L            | 0.318  | -0.243 | 0.879  | 0.286 | 1.111  | 0.008  | 2.67E-01 | 18725 | -0.085 | -0.561  | 0.391  | 0.243 | -0.350 | -0.003 | 7.26E-01 | 18410 |
| 84  | Heschl_R            | 0.350  | -0.277 | 0.977  | 0.320 | 1.095  | 0.008  | 2.73E-01 | 18725 | -0.022 | -0.554  | 0.510  | 0.272 | -0.081 | -0.001 | 9.36E-01 | 18410 |
| 85  | Temporal_Sup_L      | 2.299  | -1.753 | 6.350  | 2.067 | 1.112  | 0.008  | 2.66E-01 | 18725 | 2.484  | -0.955  | 5.924  | 1.755 | 1.416  | 0.010  | 1.57E-01 | 18410 |
| 86  | Temporal_Sup_R      | 3.586  | -0.896 | 8.069  | 2.287 | 1.568  | 0.011  | 1.17E-01 | 18725 | 2.380  | -1.427  | 6.186  | 1.942 | 1.225  | 0.009  | 2.20E-01 | 18410 |
| 87  | Temporal_Pole_Sup_L | -0.392 | -2.311 | 1.527  | 0.979 | -0.400 | -0.003 | 6.89E-01 | 18725 | 0.537  | -1.092  | 2.165  | 0.831 | 0.646  | 0.005  | 5.18E-01 | 18410 |
| 88  | Temporal_Pole_Sup_R | 0.803  | -1.218 | 2.825  | 1.031 | 0.779  | 0.006  | 4.36E-01 | 18725 | 1.405  | -0.311  | 3.122  | 0.876 | 1.605  | 0.012  | 1.09E-01 | 18410 |
| 89  | Temporal_Mid_L      | 4.999  | -1.755 | 11.753 | 3.446 | 1.451  | 0.011  | 1.47E-01 | 18725 | 3.251  | -2.481  | 8.984  | 2.925 | 1.112  | 0.008  | 2.66E-01 | 18410 |
| 90  | Temporal_Mid_R      | -0.373 | -6.370 | 5.624  | 3.059 | -0.122 | -0.001 | 9.03E-01 | 18725 | -1.169 | -6.261  | 3.924  | 2.598 | -0.450 | -0.003 | 6.53E-01 | 18410 |
| 91  | Temporal_Pole_Mid_L | 0.805  | -0.808 | 2.417  | 0.823 | 0.978  | 0.007  | 3.28E-01 | 18725 | 0.413  | -0.957  | 1.782  | 0.699 | 0.591  | 0.004  | 5.55E-01 | 18410 |
| 92  | Temporal_Pole_Mid_R | 2.464  | 0.503  | 4.424  | 1.000 | 2.463  | 0.018  | 1.38E-02 | 18725 | 1.793  | 0.129   | 3.457  | 0.849 | 2.112  | 0.016  | 3.47E-02 | 18410 |
| 93  | Temporal_Inf_L      | 0.965  | -3.677 | 5.608  | 2.368 | 0.407  | 0.003  | 6.84E-01 | 18725 | -1.524 | -5.466  | 2.419  | 2.011 | -0.758 | -0.006 | 4.49E-01 | 18410 |
| 94  | Temporal_Inf_R      | 2.653  | -2.411 | 7.716  | 2.583 | 1.027  | 0.008  | 3.04E-01 | 18725 | -1.078 | -5.372  | 3.217  | 2.191 | -0.492 | -0.004 | 6.23E-01 | 18410 |
| 95  | Cerebellum_Crus1_L  | 4.553  | -0.957 | 10.064 | 2.811 | 1.620  | 0.012  | 1.05E-01 | 18725 | 0.451  | -4.216  | 5.118  | 2.381 | 0.189  | 0.001  | 8.50E-01 | 18410 |
| 96  | Cerebellum_Crus1_R  | 0.255  | -5.364 | 5.875  | 2.867 | 0.089  | 0.001  | 9.29E-01 | 18725 | -0.414 | -5.175  | 4.347  | 2.429 | -0.170 | -0.001 | 8.65E-01 | 18410 |
| 97  | Cerebellum_Crus2_L  | -0.762 | -5.135 | 3.610  | 2.231 | -0.342 | -0.002 | 7.33E-01 | 18725 | 4.712  | 1.006   | 8.419  | 1.891 | 2.492  | 0.018  | 1.27E-02 | 18410 |
| 98  | Cerebellum_Crus2_R  | 1.780  | -2.264 | 5.824  | 2.063 | 0.863  | 0.006  | 3.88E-01 | 18725 | 3.268  | -0.160  | 6.696  | 1.749 | 1.868  | 0.014  | 6.17E-02 | 18410 |
| 99  | Cerebellum_3_L      | 0.107  | -0.187 | 0.400  | 0.150 | 0.714  | 0.005  | 4.75E-01 | 18725 | -0.341 | -0.590  | -0.093 | 0.127 | -2.689 | -0.020 | 7.17E-03 | 18410 |
| 100 | Cerebellum_3_R      | -0.034 | -0.430 | 0.362  | 0.202 | -0.167 | -0.001 | 8.68E-01 | 18725 | -0.560 | -0.896  | -0.224 | 0.171 | -3.270 | -0.024 | 1.08E-03 | 18410 |
| 101 | Cerebellum_4_5_L    | 0.127  | -2.246 | 2.500  | 1.211 | 0.105  | 0.001  | 9.17E-01 | 18725 | -1.777 | -3.789  | 0.236  | 1.027 | -1.730 | -0.013 | 8.36E-02 | 18410 |
| 102 | Cerebellum_4_5_R    | -0.057 | -1.991 | 1.876  | 0.986 | -0.058 | 0.000  | 9.54E-01 | 18725 | -1.521 | -3.161  | 0.119  | 0.837 | -1.818 | -0.013 | 6.90E-02 | 18410 |
| 103 | Cerebellum_6_L      | 1.698  | -2.403 | 5.799  | 2.092 | 0.812  | 0.006  | 4.17E-01 | 18725 | -2.276 | -5.752  | 1.201  | 1.774 | -1.283 | -0.009 | 1.99E-01 | 18410 |
| 104 | Cerebellum_6_R      | 0.224  | -4.097 | 4.545  | 2.205 | 0.102  | 0.001  | 9.19E-01 | 18725 | -2.053 | -5.718  | 1.611  | 1.869 | -1.098 | -0.008 | 2.72E-01 | 18410 |
| 105 | Cerebellum_7b_L     | -0.135 | -1.471 | 1.202  | 0.682 | -0.197 | -0.001 | 8.44E-01 | 18725 | 2.013  | 0.881   | 3.146  | 0.578 | 3.484  | 0.026  | 4.95E-04 | 18410 |
| 106 | Cerebellum_7b_R     | 0.573  | -0.752 | 1.897  | 0.676 | 0.848  | 0.006  | 3.97E-01 | 18725 | 2.223  | 1.100   | 3.347  | 0.573 | 3.880  | 0.029  | 1.05E-04 | 18410 |
| 107 | Cerebellum_8_L      | -1.926 | -6.168 | 2.317  | 2.165 | -0.890 | -0.007 | 3.74E-01 | 18725 | 2.434  | -1.160  | 6.028  | 1.834 | 1.328  | 0.010  | 1.84E-01 | 18410 |
| 108 | Cerebellum_8_R      | -1.540 | -7.062 | 3.982  | 2.817 | -0.547 | -0.004 | 5.85E-01 | 18725 | 6.831  | 2.151   | 11.511 | 2.388 | 2.861  | 0.021  | 4.23E-03 | 18410 |
| 109 | Cerebellum_9_L      | -1.924 | -4.322 | 0.475  | 1.224 | -1.572 | -0.011 | 1.16E-01 | 18725 | 0.108  | -1.927  | 2.143  | 1.038 | 0.104  | 0.001  | 9.17E-01 | 18410 |
| 110 | Cerebellum_9_R      | -3.134 | -5.491 | -0.776 | 1.203 | -2.605 | -0.019 | 9.19E-03 | 18725 | 0.366  | -1.633  | 2.365  | 1.020 | 0.359  | 0.003  | 7.20E-01 | 18410 |
| 111 | Cerebellum_10_L     | -0.097 | -0.267 | 0.073  | 0.087 | -1.120 | -0.008 | 2.63E-01 | 18725 | -0.160 | -0.305  | -0.016 | 0.074 | -2.175 | -0.016 | 2.96E-02 | 18410 |
| 112 | Cerebellum_10_R     | 0.019  | -0.158 | 0.196  | 0.090 | 0.214  | 0.002  | 8.31E-01 | 18725 | 0.000  | -0.150  | 0.150  | 0.077 | 0.004  | 0.000  | 9.97E-01 | 18410 |

|     |            |        |        |       |       |        |        |          |       |        |        |        |       |        |        |          |       |
|-----|------------|--------|--------|-------|-------|--------|--------|----------|-------|--------|--------|--------|-------|--------|--------|----------|-------|
| 113 | Vermis_1_2 | 0.058  | -0.053 | 0.168 | 0.056 | 1.025  | 0.007  | 3.05E-01 | 18725 | -0.156 | -0.250 | -0.062 | 0.048 | -3.260 | -0.024 | 1.12E-03 | 18410 |
| 114 | Vermis_3   | 0.252  | -0.188 | 0.692 | 0.224 | 1.122  | 0.008  | 2.62E-01 | 18725 | -0.144 | -0.517 | 0.228  | 0.190 | -0.759 | -0.006 | 4.48E-01 | 18410 |
| 115 | Vermis_4_5 | -0.372 | -1.665 | 0.920 | 0.659 | -0.565 | -0.004 | 5.72E-01 | 18725 | 0.110  | -0.987 | 1.206  | 0.559 | 0.196  | 0.001  | 8.45E-01 | 18410 |
| 116 | Vermis_6   | -0.425 | -1.144 | 0.295 | 0.367 | -1.157 | -0.008 | 2.47E-01 | 18725 | -0.556 | -1.167 | 0.054  | 0.311 | -1.787 | -0.013 | 7.40E-02 | 18410 |
| 117 | Vermis_7   | -0.174 | -0.581 | 0.233 | 0.208 | -0.839 | -0.006 | 4.02E-01 | 18725 | -0.327 | -0.671 | 0.018  | 0.176 | -1.856 | -0.014 | 6.35E-02 | 18410 |
| 118 | Vermis_8   | -0.096 | -0.764 | 0.573 | 0.341 | -0.280 | -0.002 | 7.79E-01 | 18725 | -0.180 | -0.747 | 0.387  | 0.289 | -0.623 | -0.005 | 5.34E-01 | 18410 |
| 119 | Vermis_9   | -0.527 | -1.068 | 0.015 | 0.276 | -1.904 | -0.014 | 5.69E-02 | 18725 | 0.112  | -0.347 | 0.571  | 0.234 | 0.478  | 0.004  | 6.33E-01 | 18410 |
| 120 | Vermis_10  | -0.112 | -0.263 | 0.039 | 0.077 | -1.452 | -0.011 | 1.46E-01 | 18725 | -0.103 | -0.231 | 0.025  | 0.065 | -1.576 | -0.012 | 1.15E-01 | 18410 |
| 121 | Thal_AV_L  | 0.032  | -0.029 | 0.092 | 0.031 | 1.026  | 0.008  | 3.05E-01 | 18725 | 0.088  | 0.037  | 0.140  | 0.026 | 3.368  | 0.025  | 7.59E-04 | 18410 |
| 122 | Thal_AV_R  | 0.108  | 0.022  | 0.195 | 0.044 | 2.453  | 0.018  | 1.42E-02 | 18725 | 0.120  | 0.046  | 0.193  | 0.037 | 3.199  | 0.024  | 1.38E-03 | 18410 |
| 123 | Thal_LP_L  | -0.012 | -0.079 | 0.055 | 0.034 | -0.360 | -0.003 | 7.19E-01 | 18725 | 0.087  | 0.030  | 0.144  | 0.029 | 3.006  | 0.022  | 2.65E-03 | 18410 |
| 124 | Thal_LP_R  | 0.040  | -0.048 | 0.127 | 0.045 | 0.886  | 0.006  | 3.76E-01 | 18725 | 0.110  | 0.035  | 0.184  | 0.038 | 2.896  | 0.021  | 3.78E-03 | 18410 |
| 125 | Thal_VA_L  | 0.037  | -0.034 | 0.109 | 0.036 | 1.024  | 0.007  | 3.06E-01 | 18725 | 0.039  | -0.022 | 0.100  | 0.031 | 1.255  | 0.009  | 2.10E-01 | 18410 |
| 126 | Thal_VA_R  | 0.097  | 0.010  | 0.185 | 0.045 | 2.173  | 0.016  | 2.98E-02 | 18725 | 0.060  | -0.015 | 0.134  | 0.038 | 1.570  | 0.012  | 1.16E-01 | 18410 |
| 127 | Thal_VL_L  | -0.091 | -0.295 | 0.113 | 0.104 | -0.875 | -0.006 | 3.82E-01 | 18725 | 0.324  | 0.151  | 0.497  | 0.088 | 3.677  | 0.027  | 2.37E-04 | 18410 |
| 128 | Thal_VL_R  | 0.114  | -0.157 | 0.384 | 0.138 | 0.823  | 0.006  | 4.11E-01 | 18725 | 0.520  | 0.290  | 0.750  | 0.117 | 4.438  | 0.033  | 9.15E-06 | 18410 |
| 129 | Thal_VPL_L | -0.078 | -0.321 | 0.164 | 0.124 | -0.632 | -0.005 | 5.27E-01 | 18725 | 0.278  | 0.072  | 0.484  | 0.105 | 2.647  | 0.020  | 8.12E-03 | 18410 |
| 130 | Thal_VPL_R | -0.176 | -0.431 | 0.078 | 0.130 | -1.357 | -0.010 | 1.75E-01 | 18725 | 0.252  | 0.035  | 0.468  | 0.111 | 2.277  | 0.017  | 2.28E-02 | 18410 |
| 131 | Thal_IL_L  | -0.017 | -0.121 | 0.088 | 0.054 | -0.309 | -0.002 | 7.58E-01 | 18725 | 0.110  | 0.021  | 0.199  | 0.045 | 2.413  | 0.018  | 1.58E-02 | 18410 |
| 132 | Thal_IL_R  | -0.005 | -0.124 | 0.114 | 0.061 | -0.080 | -0.001 | 9.36E-01 | 18725 | 0.126  | 0.024  | 0.227  | 0.052 | 2.434  | 0.018  | 1.49E-02 | 18410 |
| 133 | Thal_Re_L  | 0.000  | 0.000  | 0.001 | 0.000 | 0.901  | 0.007  | 3.68E-01 | 18725 | 0.000  | 0.000  | 0.001  | 0.000 | 0.637  | 0.005  | 5.24E-01 | 18410 |
| 134 | Thal_Re_R  | 0.002  | -0.001 | 0.006 | 0.002 | 1.296  | 0.009  | 1.95E-01 | 18725 | 0.004  | 0.001  | 0.007  | 0.002 | 2.374  | 0.017  | 1.76E-02 | 18410 |
| 135 | Thal_MDm_L | 0.203  | -0.575 | 0.980 | 0.396 | 0.511  | 0.004  | 6.09E-01 | 18725 | 1.155  | 0.495  | 1.815  | 0.337 | 3.431  | 0.025  | 6.04E-04 | 18410 |
| 136 | Thal_MDm_R | 0.135  | -0.768 | 1.038 | 0.461 | 0.292  | 0.002  | 7.70E-01 | 18725 | 1.400  | 0.633  | 2.167  | 0.391 | 3.579  | 0.026  | 3.46E-04 | 18410 |
| 137 | Thal_MDI_L | -0.026 | -0.160 | 0.109 | 0.069 | -0.375 | -0.003 | 7.07E-01 | 18725 | 0.233  | 0.118  | 0.347  | 0.058 | 3.989  | 0.029  | 6.67E-05 | 18410 |
| 138 | Thal_MDI_R | 0.015  | -0.138 | 0.168 | 0.078 | 0.193  | 0.001  | 8.47E-01 | 18725 | 0.252  | 0.122  | 0.382  | 0.066 | 3.806  | 0.028  | 1.42E-04 | 18410 |
| 139 | Thal_LGN_L | -0.002 | -0.022 | 0.018 | 0.010 | -0.192 | -0.001 | 8.48E-01 | 18725 | -0.002 | -0.019 | 0.016  | 0.009 | -0.182 | -0.001 | 8.56E-01 | 18410 |
| 140 | Thal_LGN_R | -0.024 | -0.068 | 0.019 | 0.022 | -1.093 | -0.008 | 2.74E-01 | 18725 | 0.020  | -0.017 | 0.057  | 0.019 | 1.061  | 0.008  | 2.89E-01 | 18410 |
| 141 | Thal_MGN_L | -0.019 | -0.055 | 0.018 | 0.019 | -1.011 | -0.007 | 3.12E-01 | 18725 | -0.018 | -0.049 | 0.013  | 0.016 | -1.147 | -0.008 | 2.51E-01 | 18410 |
| 142 | Thal_MGN_R | -0.026 | -0.065 | 0.014 | 0.020 | -1.263 | -0.009 | 2.07E-01 | 18725 | 0.000  | -0.034 | 0.033  | 0.017 | -0.010 | 0.000  | 9.92E-01 | 18410 |
| 143 | Thal_PuA_L | 0.001  | -0.042 | 0.044 | 0.022 | 0.037  | 0.000  | 9.70E-01 | 18725 | -0.015 | -0.052 | 0.021  | 0.019 | -0.811 | -0.006 | 4.17E-01 | 18410 |
| 144 | Thal_PuA_R | -0.047 | -0.137 | 0.042 | 0.046 | -1.034 | -0.008 | 3.01E-01 | 18725 | -0.003 | -0.079 | 0.073  | 0.039 | -0.084 | -0.001 | 9.33E-01 | 18410 |
| 145 | Thal_PuM_L | 0.280  | -0.575 | 1.135 | 0.436 | 0.643  | 0.005  | 5.21E-01 | 18725 | 0.385  | -0.342 | 1.111  | 0.371 | 1.037  | 0.008  | 3.00E-01 | 18410 |
| 146 | Thal_PuM_R | -0.189 | -1.254 | 0.877 | 0.544 | -0.347 | -0.003 | 7.28E-01 | 18725 | 0.356  | -0.549 | 1.262  | 0.462 | 0.771  | 0.006  | 4.41E-01 | 18410 |
| 147 | Thal_PuL_L | 0.004  | -0.152 | 0.160 | 0.080 | 0.052  | 0.000  | 9.58E-01 | 18725 | 0.130  | -0.003 | 0.263  | 0.068 | 1.922  | 0.014  | 5.46E-02 | 18410 |
| 148 | Thal_PuL_R | -0.090 | -0.338 | 0.158 | 0.127 | -0.712 | -0.005 | 4.76E-01 | 18725 | 0.154  | -0.057 | 0.365  | 0.108 | 1.428  | 0.011  | 1.53E-01 | 18410 |
| 149 | Thal_PuL_L | 0.007  | -0.036 | 0.049 | 0.022 | 0.317  | 0.002  | 7.51E-01 | 18725 | 0.036  | 0.000  | 0.073  | 0.018 | 1.984  | 0.015  | 4.73E-02 | 18410 |
| 150 | Thal_PuL_R | 0.002  | -0.055 | 0.058 | 0.029 | 0.056  | 0.000  | 9.56E-01 | 18725 | 0.039  | -0.009 | 0.087  | 0.024 | 1.593  | 0.012  | 1.11E-01 | 18410 |
| 151 | ACC_sub_L  | -0.183 | -0.672 | 0.306 | 0.250 | -0.733 | -0.005 | 4.64E-01 | 18725 | -0.442 | -0.857 | -0.026 | 0.212 | -2.085 | -0.015 | 3.71E-02 | 18410 |
| 152 | ACC_sub_R  | -0.257 | -0.714 | 0.200 | 0.233 | -1.101 | -0.008 | 2.71E-01 | 18725 | -0.284 | -0.673 | 0.104  | 0.198 | -1.436 | -0.011 | 1.51E-01 | 18410 |
| 153 | ACC_pre_L  | -0.799 | -2.054 | 0.455 | 0.640 | -1.249 | -0.009 | 2.12E-01 | 18725 | -0.179 | -1.245 | 0.886  | 0.544 | -0.330 | -0.002 | 7.41E-01 | 18410 |
| 154 | ACC_pre_R  | -0.377 | -1.586 | 0.832 | 0.617 | -0.611 | -0.004 | 5.41E-01 | 18725 | -0.130 | -1.156 | 0.896  | 0.524 | -0.248 | -0.002 | 8.04E-01 | 18410 |
| 155 | ACC_sup_L  | -1.134 | -2.498 | 0.229 | 0.696 | -1.631 | -0.012 | 1.03E-01 | 18725 | 0.064  | -1.095 | 1.222  | 0.591 | 0.108  | 0.001  | 9.14E-01 | 18410 |
| 156 | ACC_sup_R  | -0.522 | -1.935 | 0.890 | 0.721 | -0.725 | -0.005 | 4.69E-01 | 18725 | -0.491 | -1.690 | 0.709  | 0.612 | -0.802 | -0.006 | 4.23E-01 | 18410 |
| 157 | N_Acc_L    | 0.281  | -0.129 | 0.692 | 0.209 | 1.343  | 0.010  | 1.79E-01 | 18725 | 0.248  | -0.100 | 0.597  | 0.178 | 1.395  | 0.010  | 1.63E-01 | 18410 |
| 158 | N_Acc_R    | 0.011  | -0.344 | 0.366 | 0.181 | 0.063  | 0.000  | 9.50E-01 | 18725 | 0.187  | -0.114 | 0.489  | 0.154 | 1.218  | 0.009  | 2.23E-01 | 18410 |
| 159 | VTA_L      | 0.006  | -0.009 | 0.020 | 0.007 | 0.783  | 0.006  | 4.33E-01 | 18725 | 0.001  | -0.011 | 0.013  | 0.006 | 0.133  | 0.001  | 8.94E-01 | 18410 |
| 160 | VTA_R      | 0.000  | -0.013 | 0.013 | 0.007 | 0.004  | 0.000  | 9.97E-01 | 18725 | 0.004  | -0.007 | 0.015  | 0.006 | 0.730  | 0.005  | 4.66E-01 | 18410 |

|     |         |        |        |       |       |        |        |          |       |        |        |        |       |        |        |          |       |
|-----|---------|--------|--------|-------|-------|--------|--------|----------|-------|--------|--------|--------|-------|--------|--------|----------|-------|
| 161 | SN_pc_L | -0.005 | -0.028 | 0.019 | 0.012 | -0.386 | -0.003 | 6.99E-01 | 18725 | -0.001 | -0.020 | 0.019  | 0.010 | -0.056 | 0.000  | 9.56E-01 | 18410 |
| 162 | SN_pc_R | -0.024 | -0.054 | 0.007 | 0.016 | -1.536 | -0.011 | 1.25E-01 | 18725 | 0.001  | -0.025 | 0.027  | 0.013 | 0.080  | 0.001  | 9.36E-01 | 18410 |
| 163 | SN_pr_L | -0.016 | -0.048 | 0.015 | 0.016 | -1.024 | -0.007 | 3.06E-01 | 18725 | 0.021  | -0.006 | 0.047  | 0.014 | 1.514  | 0.011  | 1.30E-01 | 18410 |
| 164 | SN_pr_R | -0.022 | -0.057 | 0.014 | 0.018 | -1.200 | -0.009 | 2.30E-01 | 18725 | 0.005  | -0.025 | 0.035  | 0.015 | 0.348  | 0.003  | 7.28E-01 | 18410 |
| 165 | Red_N_L | 0.007  | -0.032 | 0.046 | 0.020 | 0.343  | 0.003  | 7.32E-01 | 18725 | -0.006 | -0.039 | 0.027  | 0.017 | -0.372 | -0.003 | 7.10E-01 | 18410 |
| 166 | Red_N_R | -0.010 | -0.052 | 0.032 | 0.022 | -0.455 | -0.003 | 6.49E-01 | 18725 | 0.008  | -0.028 | 0.044  | 0.018 | 0.451  | 0.003  | 6.52E-01 | 18410 |
| 167 | LC_L    | 0.015  | 0.000  | 0.029 | 0.007 | 1.982  | 0.014  | 4.75E-02 | 18725 | -0.016 | -0.029 | -0.004 | 0.006 | -2.624 | -0.019 | 8.69E-03 | 18410 |
| 168 | LC_R    | 0.006  | -0.010 | 0.021 | 0.008 | 0.700  | 0.005  | 4.84E-01 | 18725 | -0.023 | -0.036 | -0.010 | 0.007 | -3.360 | -0.025 | 7.81E-04 | 18410 |
| 169 | Raphe_D | 0.022  | -0.035 | 0.078 | 0.029 | 0.751  | 0.005  | 4.53E-01 | 18725 | 0.021  | -0.027 | 0.068  | 0.024 | 0.843  | 0.006  | 3.99E-01 | 18410 |
| 170 | Raphe_M | 0.020  | 0.003  | 0.037 | 0.009 | 2.295  | 0.017  | 2.18E-02 | 18725 | -0.015 | -0.030 | -0.001 | 0.007 | -2.079 | -0.015 | 3.77E-02 | 18410 |

**Non-oily fish intake**

| Number | AAL 3 region         | beta   | 95%CI l  | 95%CI h | se     | t      | r      | p        | df.e  |
|--------|----------------------|--------|----------|---------|--------|--------|--------|----------|-------|
| 0      | Total brain          | 34.897 | -137.429 | 207.224 | 87.918 | 0.397  | 0.003  | 6.91E-01 | 18700 |
| 1      | Precentral_L         | -2.070 | -8.137   | 3.997   | 3.095  | -0.669 | -0.005 | 5.04E-01 | 18700 |
| 2      | Precentral_R         | -2.073 | -7.632   | 3.486   | 2.836  | -0.731 | -0.005 | 4.65E-01 | 18700 |
| 3      | Frontal_Sup_2_L      | -5.168 | -11.573  | 1.238   | 3.268  | -1.581 | -0.012 | 1.14E-01 | 18700 |
| 4      | Frontal_Sup_2_R      | -5.242 | -12.302  | 1.818   | 3.602  | -1.455 | -0.011 | 1.46E-01 | 18700 |
| 5      | Frontal_Mid_2_L      | -0.330 | -7.059   | 6.400   | 3.433  | -0.096 | -0.001 | 9.24E-01 | 18700 |
| 6      | Frontal_Mid_2_R      | -2.241 | -9.853   | 5.372   | 3.884  | -0.577 | -0.004 | 5.64E-01 | 18700 |
| 7      | Frontal_Inf_Oper_L   | -2.555 | -4.542   | -0.567  | 1.014  | -2.520 | -0.018 | 1.18E-02 | 18700 |
| 8      | Frontal_Inf_Oper_R   | -2.782 | -5.273   | -0.290  | 1.271  | -2.189 | -0.016 | 2.86E-02 | 18700 |
| 9      | Frontal_Inf_Tri_L    | -0.143 | -4.365   | 4.079   | 2.154  | -0.066 | 0.000  | 9.47E-01 | 18700 |
| 10     | Frontal_Inf_Tri_R    | -1.354 | -4.669   | 1.961   | 1.691  | -0.801 | -0.006 | 4.23E-01 | 18700 |
| 11     | Frontal_Inf_Orb_2_L  | 0.062  | -1.200   | 1.324   | 0.644  | 0.097  | 0.001  | 9.23E-01 | 18700 |
| 12     | Frontal_Inf_Orb_2_R  | -0.250 | -1.570   | 1.070   | 0.673  | -0.372 | -0.003 | 7.10E-01 | 18700 |
| 13     | Rolandic_Oper_L      | 0.620  | -1.289   | 2.529   | 0.974  | 0.636  | 0.005  | 5.25E-01 | 18700 |
| 14     | Rolandic_Oper_R      | 1.492  | -1.239   | 4.223   | 1.393  | 1.071  | 0.008  | 2.84E-01 | 18700 |
| 15     | Supp_Motor_Area_L    | -2.978 | -7.513   | 1.558   | 2.314  | -1.287 | -0.009 | 1.98E-01 | 18700 |
| 16     | Supp_Motor_Area_R    | -0.405 | -5.419   | 4.609   | 2.558  | -0.158 | -0.001 | 8.74E-01 | 18700 |
| 17     | Olfactory_L          | 0.679  | 0.005    | 1.354   | 0.344  | 1.974  | 0.014  | 4.84E-02 | 18700 |
| 18     | Olfactory_R          | 0.403  | -0.273   | 1.080   | 0.345  | 1.169  | 0.009  | 2.42E-01 | 18700 |
| 19     | Frontal_Sup_Medial_L | -4.328 | -8.581   | -0.076  | 2.170  | -1.995 | -0.015 | 4.61E-02 | 18700 |
| 20     | Frontal_Sup_Medial_R | -1.746 | -4.842   | 1.349   | 1.579  | -1.106 | -0.008 | 2.69E-01 | 18700 |
| 21     | Frontal_Med_Orb_L    | -0.550 | -2.138   | 1.039   | 0.810  | -0.678 | -0.005 | 4.98E-01 | 18700 |
| 22     | Frontal_Med_Orb_R    | -0.891 | -2.842   | 1.061   | 0.996  | -0.894 | -0.007 | 3.71E-01 | 18700 |
| 23     | Rectus_L             | 0.424  | -1.220   | 2.068   | 0.839  | 0.506  | 0.004  | 6.13E-01 | 18700 |
| 24     | Rectus_R             | 0.431  | -1.089   | 1.952   | 0.776  | 0.556  | 0.004  | 5.78E-01 | 18700 |
| 25     | OFCmed_L             | -0.545 | -1.498   | 0.408   | 0.486  | -1.120 | -0.008 | 2.63E-01 | 18700 |
| 26     | OFCmed_R             | -0.503 | -1.614   | 0.607   | 0.567  | -0.888 | -0.006 | 3.74E-01 | 18700 |
| 27     | OFCant_L             | -0.634 | -1.736   | 0.468   | 0.562  | -1.127 | -0.008 | 2.60E-01 | 18700 |
| 28     | OFCant_R             | -1.427 | -2.883   | 0.028   | 0.743  | -1.922 | -0.014 | 5.46E-02 | 18700 |
| 29     | OFCpost_L            | -0.093 | -1.474   | 1.287   | 0.704  | -0.132 | -0.001 | 8.95E-01 | 18700 |
| 30     | OFCpost_R            | -0.922 | -2.198   | 0.354   | 0.651  | -1.417 | -0.010 | 1.57E-01 | 18700 |
| 31     | OFClat_L             | -0.112 | -0.578   | 0.354   | 0.238  | -0.471 | -0.003 | 6.37E-01 | 18700 |
| 32     | OFClat_R             | -0.351 | -0.744   | 0.043   | 0.201  | -1.748 | -0.013 | 8.05E-02 | 18700 |
| 33     | Insula_L             | 0.423  | -3.845   | 4.692   | 2.178  | 0.194  | 0.001  | 8.46E-01 | 18700 |
| 34     | Insula_R             | -0.135 | -4.293   | 4.023   | 2.121  | -0.064 | 0.000  | 9.49E-01 | 18700 |
| 37     | Cingulate_Mid_L      | -1.251 | -4.858   | 2.356   | 1.840  | -0.680 | -0.005 | 4.97E-01 | 18700 |

|    |                      |        |        |        |       |        |        |          |       |
|----|----------------------|--------|--------|--------|-------|--------|--------|----------|-------|
| 38 | Cingulate_Mid_R      | -1.554 | -5.401 | 2.292  | 1.962 | -0.792 | -0.006 | 4.28E-01 | 18700 |
| 39 | Cingulate_Post_L     | -0.280 | -1.383 | 0.822  | 0.562 | -0.498 | -0.004 | 6.18E-01 | 18700 |
| 40 | Cingulate_Post_R     | 0.010  | -0.601 | 0.622  | 0.312 | 0.032  | 0.000  | 9.74E-01 | 18700 |
| 41 | Hippocampus_L        | 0.550  | -1.233 | 2.332  | 0.909 | 0.604  | 0.004  | 5.46E-01 | 18700 |
| 42 | Hippocampus_R        | 0.769  | -1.078 | 2.617  | 0.943 | 0.816  | 0.006  | 4.14E-01 | 18700 |
| 43 | ParaHippocampal_L    | 0.587  | -0.996 | 2.170  | 0.808 | 0.727  | 0.005  | 4.67E-01 | 18700 |
| 44 | ParaHippocampal_R    | -0.002 | -1.998 | 1.994  | 1.018 | -0.002 | 0.000  | 9.99E-01 | 18700 |
| 45 | Amygdala_L           | -0.061 | -0.677 | 0.554  | 0.314 | -0.196 | -0.001 | 8.45E-01 | 18700 |
| 46 | Amygdala_R           | -0.372 | -1.001 | 0.257  | 0.321 | -1.158 | -0.008 | 2.47E-01 | 18700 |
| 47 | Calcarine_L          | 7.637  | 1.765  | 13.510 | 2.996 | 2.549  | 0.019  | 1.08E-02 | 18700 |
| 48 | Calcarine_R          | 5.131  | 0.224  | 10.039 | 2.504 | 2.049  | 0.015  | 4.04E-02 | 18700 |
| 49 | Cuneus_L             | 4.228  | 0.546  | 7.911  | 1.879 | 2.251  | 0.016  | 2.44E-02 | 18700 |
| 50 | Cuneus_R             | 1.223  | -1.594 | 4.040  | 1.437 | 0.851  | 0.006  | 3.95E-01 | 18700 |
| 51 | Lingual_L            | 5.347  | 1.817  | 8.876  | 1.801 | 2.969  | 0.022  | 2.99E-03 | 18700 |
| 52 | Lingual_R            | 3.518  | -0.182 | 7.217  | 1.887 | 1.864  | 0.014  | 6.24E-02 | 18700 |
| 53 | Occipital_Sup_L      | 0.411  | -2.017 | 2.838  | 1.238 | 0.332  | 0.002  | 7.40E-01 | 18700 |
| 54 | Occipital_Sup_R      | -2.525 | -5.157 | 0.107  | 1.343 | -1.880 | -0.014 | 6.01E-02 | 18700 |
| 55 | Occipital_Mid_L      | 3.212  | -2.476 | 8.901  | 2.902 | 1.107  | 0.008  | 2.68E-01 | 18700 |
| 56 | Occipital_Mid_R      | -1.886 | -5.848 | 2.075  | 2.021 | -0.933 | -0.007 | 3.51E-01 | 18700 |
| 57 | Occipital_Inf_L      | 2.871  | 0.982  | 4.759  | 0.963 | 2.980  | 0.022  | 2.89E-03 | 18700 |
| 58 | Occipital_Inf_R      | 0.115  | -2.067 | 2.296  | 1.113 | 0.103  | 0.001  | 9.18E-01 | 18700 |
| 59 | Fusiform_L           | 3.493  | -0.640 | 7.627  | 2.109 | 1.656  | 0.012  | 9.76E-02 | 18700 |
| 60 | Fusiform_R           | 4.680  | 0.138  | 9.221  | 2.317 | 2.020  | 0.015  | 4.34E-02 | 18700 |
| 61 | Postcentral_L        | -3.461 | -9.680 | 2.759  | 3.173 | -1.091 | -0.008 | 2.75E-01 | 18700 |
| 62 | Postcentral_R        | -2.707 | -9.083 | 3.669  | 3.253 | -0.832 | -0.006 | 4.05E-01 | 18700 |
| 63 | Parietal_Sup_L       | -3.760 | -7.344 | -0.177 | 1.828 | -2.057 | -0.015 | 3.97E-02 | 18700 |
| 64 | Parietal_Sup_R       | -1.475 | -4.655 | 1.705  | 1.622 | -0.909 | -0.007 | 3.63E-01 | 18700 |
| 65 | Parietal_Inf_L       | -1.948 | -6.639 | 2.744  | 2.393 | -0.814 | -0.006 | 4.16E-01 | 18700 |
| 66 | Parietal_Inf_R       | -1.381 | -4.419 | 1.656  | 1.550 | -0.891 | -0.007 | 3.73E-01 | 18700 |
| 67 | SupraMarginal_L      | -0.977 | -3.727 | 1.772  | 1.403 | -0.697 | -0.005 | 4.86E-01 | 18700 |
| 68 | SupraMarginal_R      | -3.230 | -7.121 | 0.660  | 1.985 | -1.628 | -0.012 | 1.04E-01 | 18700 |
| 69 | Angular_L            | 1.736  | -0.964 | 4.436  | 1.377 | 1.261  | 0.009  | 2.07E-01 | 18700 |
| 70 | Angular_R            | 4.021  | 0.402  | 7.641  | 1.847 | 2.178  | 0.016  | 2.94E-02 | 18700 |
| 71 | Precuneus_L          | -1.682 | -8.265 | 4.901  | 3.358 | -0.501 | -0.004 | 6.17E-01 | 18700 |
| 72 | Precuneus_R          | -0.988 | -6.851 | 4.875  | 2.991 | -0.330 | -0.002 | 7.41E-01 | 18700 |
| 73 | Paracentral_Lobule_L | -1.362 | -4.374 | 1.651  | 1.537 | -0.886 | -0.006 | 3.76E-01 | 18700 |
| 74 | Paracentral_Lobule_R | -2.659 | -4.817 | -0.501 | 1.101 | -2.415 | -0.018 | 1.57E-02 | 18700 |
| 75 | Caudate_L            | 0.935  | -1.474 | 3.343  | 1.229 | 0.761  | 0.006  | 4.47E-01 | 18700 |
| 76 | Caudate_R            | 1.324  | -1.403 | 4.050  | 1.391 | 0.952  | 0.007  | 3.41E-01 | 18700 |
| 77 | Putamen_L            | -1.385 | -5.042 | 2.271  | 1.866 | -0.743 | -0.005 | 4.58E-01 | 18700 |
| 78 | Putamen_R            | -1.762 | -5.486 | 1.962  | 1.900 | -0.928 | -0.007 | 3.54E-01 | 18700 |
| 79 | Pallidum_L           | -0.220 | -0.545 | 0.105  | 0.166 | -1.327 | -0.010 | 1.84E-01 | 18700 |
| 80 | Pallidum_R           | -0.231 | -0.587 | 0.126  | 0.182 | -1.267 | -0.009 | 2.05E-01 | 18700 |
| 83 | Heschl_L             | 0.106  | -0.553 | 0.766  | 0.336 | 0.316  | 0.002  | 7.52E-01 | 18700 |
| 84 | Heschl_R             | 0.455  | -0.281 | 1.192  | 0.376 | 1.212  | 0.009  | 2.26E-01 | 18700 |
| 85 | Temporal_Sup_L       | 0.104  | -4.656 | 4.864  | 2.428 | 0.043  | 0.000  | 9.66E-01 | 18700 |
| 86 | Temporal_Sup_R       | 2.271  | -2.994 | 7.536  | 2.686 | 0.845  | 0.006  | 3.98E-01 | 18700 |
| 87 | Temporal_Pole_Sup_L  | -0.499 | -2.753 | 1.755  | 1.150 | -0.434 | -0.003 | 6.64E-01 | 18700 |



|     |                     |        |        |        |       |        |        |          |       |
|-----|---------------------|--------|--------|--------|-------|--------|--------|----------|-------|
| 88  | Temporal_Pole_Sup_R | -0.221 | -2.594 | 2.153  | 1.211 | -0.182 | -0.001 | 8.56E-01 | 18700 |
| 89  | Temporal_Mid_L      | -0.770 | -8.700 | 7.159  | 4.045 | -0.190 | -0.001 | 8.49E-01 | 18700 |
| 90  | Temporal_Mid_R      | -2.141 | -9.178 | 4.896  | 3.590 | -0.596 | -0.004 | 5.51E-01 | 18700 |
| 91  | Temporal_Pole_Mid_L | 0.304  | -1.590 | 2.198  | 0.966 | 0.314  | 0.002  | 7.53E-01 | 18700 |
| 92  | Temporal_Pole_Mid_R | -0.711 | -3.013 | 1.592  | 1.175 | -0.605 | -0.004 | 5.45E-01 | 18700 |
| 93  | Temporal_Inf_L      | 1.893  | -3.557 | 7.342  | 2.780 | 0.681  | 0.005  | 4.96E-01 | 18700 |
| 94  | Temporal_Inf_R      | 1.395  | -4.544 | 7.335  | 3.030 | 0.460  | 0.003  | 6.45E-01 | 18700 |
| 95  | Cerebellum_Crus1_L  | 12.269 | 5.802  | 18.737 | 3.299 | 3.719  | 0.027  | 2.01E-04 | 18700 |
| 96  | Cerebellum_Crus1_R  | 8.806  | 2.210  | 15.401 | 3.365 | 2.617  | 0.019  | 8.88E-03 | 18700 |
| 97  | Cerebellum_Crus2_L  | 2.164  | -2.968 | 7.296  | 2.618 | 0.827  | 0.006  | 4.08E-01 | 18700 |
| 98  | Cerebellum_Crus2_R  | 2.449  | -2.298 | 7.195  | 2.422 | 1.011  | 0.007  | 3.12E-01 | 18700 |
| 99  | Cerebellum_3_L      | 0.360  | 0.015  | 0.704  | 0.176 | 2.046  | 0.015  | 4.08E-02 | 18700 |
| 100 | Cerebellum_3_R      | 0.352  | -0.113 | 0.817  | 0.237 | 1.484  | 0.011  | 1.38E-01 | 18700 |
| 101 | Cerebellum_4_5_L    | 2.984  | 0.198  | 5.770  | 1.421 | 2.099  | 0.015  | 3.58E-02 | 18700 |
| 102 | Cerebellum_4_5_R    | 1.739  | -0.531 | 4.010  | 1.158 | 1.502  | 0.011  | 1.33E-01 | 18700 |
| 103 | Cerebellum_6_L      | 6.843  | 2.029  | 11.656 | 2.456 | 2.786  | 0.020  | 5.33E-03 | 18700 |
| 104 | Cerebellum_6_R      | 6.267  | 1.196  | 11.338 | 2.587 | 2.422  | 0.018  | 1.54E-02 | 18700 |
| 105 | Cerebellum_7b_L     | 0.739  | -0.830 | 2.308  | 0.800 | 0.923  | 0.007  | 3.56E-01 | 18700 |
| 106 | Cerebellum_7b_R     | 0.779  | -0.775 | 2.334  | 0.793 | 0.982  | 0.007  | 3.26E-01 | 18700 |
| 107 | Cerebellum_8_L      | 3.703  | -1.275 | 8.682  | 2.540 | 1.458  | 0.011  | 1.45E-01 | 18700 |
| 108 | Cerebellum_8_R      | 4.055  | -2.424 | 10.534 | 3.305 | 1.227  | 0.009  | 2.20E-01 | 18700 |
| 109 | Cerebellum_9_L      | 1.434  | -1.383 | 4.251  | 1.437 | 0.998  | 0.007  | 3.18E-01 | 18700 |
| 110 | Cerebellum_9_R      | 0.830  | -1.940 | 3.599  | 1.413 | 0.587  | 0.004  | 5.57E-01 | 18700 |
| 111 | Cerebellum_10_L     | 0.167  | -0.033 | 0.367  | 0.102 | 1.637  | 0.012  | 1.02E-01 | 18700 |
| 112 | Cerebellum_10_R     | 0.199  | -0.009 | 0.407  | 0.106 | 1.872  | 0.014  | 6.12E-02 | 18700 |
| 113 | Vermis_1_2          | 0.084  | -0.046 | 0.214  | 0.066 | 1.265  | 0.009  | 2.06E-01 | 18700 |
| 114 | Vermis_3            | 0.274  | -0.242 | 0.791  | 0.264 | 1.041  | 0.008  | 2.98E-01 | 18700 |
| 115 | Vermis_4_5          | 0.761  | -0.757 | 2.279  | 0.775 | 0.982  | 0.007  | 3.26E-01 | 18700 |
| 116 | Vermis_6            | 0.731  | -0.114 | 1.576  | 0.431 | 1.695  | 0.012  | 9.01E-02 | 18700 |
| 117 | Vermis_7            | 0.487  | 0.009  | 0.965  | 0.244 | 1.997  | 0.015  | 4.58E-02 | 18700 |
| 118 | Vermis_8            | 0.831  | 0.046  | 1.616  | 0.400 | 2.076  | 0.015  | 3.79E-02 | 18700 |
| 119 | Vermis_9            | 0.144  | -0.492 | 0.780  | 0.325 | 0.444  | 0.003  | 6.57E-01 | 18700 |
| 120 | Vermis_10           | 0.056  | -0.122 | 0.233  | 0.091 | 0.615  | 0.004  | 5.38E-01 | 18700 |
| 121 | Tha_AV_L            | -0.011 | -0.082 | 0.060  | 0.036 | -0.304 | -0.002 | 7.61E-01 | 18700 |
| 122 | Tha_AV_R            | -0.021 | -0.123 | 0.080  | 0.052 | -0.410 | -0.003 | 6.82E-01 | 18700 |
| 123 | Tha_LP_L            | -0.049 | -0.128 | 0.030  | 0.040 | -1.212 | -0.009 | 2.25E-01 | 18700 |
| 124 | Tha_LP_R            | -0.045 | -0.148 | 0.057  | 0.052 | -0.866 | -0.006 | 3.86E-01 | 18700 |
| 125 | Tha_VA_L            | 0.025  | -0.059 | 0.109  | 0.043 | 0.589  | 0.004  | 5.56E-01 | 18700 |
| 126 | Tha_VA_R            | 0.010  | -0.093 | 0.113  | 0.053 | 0.188  | 0.001  | 8.50E-01 | 18700 |
| 127 | Tha_VL_L            | -0.161 | -0.401 | 0.078  | 0.122 | -1.322 | -0.010 | 1.86E-01 | 18700 |
| 128 | Tha_VL_R            | -0.112 | -0.430 | 0.206  | 0.162 | -0.689 | -0.005 | 4.91E-01 | 18700 |
| 129 | Tha_VPL_L           | -0.180 | -0.465 | 0.105  | 0.145 | -1.237 | -0.009 | 2.16E-01 | 18700 |
| 130 | Tha_VPL_R           | -0.143 | -0.443 | 0.156  | 0.153 | -0.936 | -0.007 | 3.49E-01 | 18700 |
| 131 | Tha_IL_L            | -0.046 | -0.169 | 0.078  | 0.063 | -0.725 | -0.005 | 4.68E-01 | 18700 |
| 132 | Tha_IL_R            | -0.077 | -0.217 | 0.063  | 0.071 | -1.083 | -0.008 | 2.79E-01 | 18700 |
| 133 | Tha_Re_L            | 0.000  | 0.000  | 0.001  | 0.000 | 0.232  | 0.002  | 8.17E-01 | 18700 |
| 134 | Tha_Re_R            | -0.003 | -0.007 | 0.002  | 0.002 | -1.238 | -0.009 | 2.16E-01 | 18700 |
| 135 | Tha_MDm_L           | -0.520 | -1.434 | 0.393  | 0.466 | -1.117 | -0.008 | 2.64E-01 | 18700 |

|     |            |        |        |        |       |        |        |          |       |
|-----|------------|--------|--------|--------|-------|--------|--------|----------|-------|
| 136 | Thal_MDm_R | -0.749 | -1.810 | 0.312  | 0.541 | -1.384 | -0.010 | 1.67E-01 | 18700 |
| 137 | Thal_MDI_L | -0.091 | -0.249 | 0.067  | 0.081 | -1.129 | -0.008 | 2.59E-01 | 18700 |
| 138 | Thal_MDI_R | -0.126 | -0.305 | 0.054  | 0.092 | -1.370 | -0.010 | 1.71E-01 | 18700 |
| 139 | Thal_LGN_L | -0.036 | -0.060 | -0.012 | 0.012 | -2.908 | -0.021 | 3.64E-03 | 18700 |
| 140 | Thal_LGN_R | -0.070 | -0.121 | -0.019 | 0.026 | -2.691 | -0.020 | 7.14E-03 | 18700 |
| 141 | Thal_MGN_L | -0.034 | -0.077 | 0.008  | 0.022 | -1.576 | -0.012 | 1.15E-01 | 18700 |
| 142 | Thal_MGN_R | -0.031 | -0.077 | 0.016  | 0.024 | -1.300 | -0.010 | 1.94E-01 | 18700 |
| 143 | Thal_PuA_L | -0.021 | -0.072 | 0.029  | 0.026 | -0.824 | -0.006 | 4.10E-01 | 18700 |
| 144 | Thal_PuA_R | -0.066 | -0.171 | 0.039  | 0.054 | -1.231 | -0.009 | 2.18E-01 | 18700 |
| 145 | Thal_PuM_L | -0.345 | -1.350 | 0.660  | 0.513 | -0.674 | -0.005 | 5.01E-01 | 18700 |
| 146 | Thal_PuM_R | -0.721 | -1.973 | 0.531  | 0.639 | -1.128 | -0.008 | 2.59E-01 | 18700 |
| 147 | Thal_PuL_L | -0.068 | -0.252 | 0.115  | 0.094 | -0.730 | -0.005 | 4.65E-01 | 18700 |
| 148 | Thal_PuL_R | -0.161 | -0.453 | 0.131  | 0.149 | -1.082 | -0.008 | 2.79E-01 | 18700 |
| 149 | Thal_PuL_L | -0.013 | -0.062 | 0.037  | 0.025 | -0.493 | -0.004 | 6.22E-01 | 18700 |
| 150 | Thal_PuL_R | -0.022 | -0.088 | 0.044  | 0.034 | -0.648 | -0.005 | 5.17E-01 | 18700 |
| 151 | ACC_sub_L  | -0.047 | -0.622 | 0.528  | 0.293 | -0.159 | -0.001 | 8.74E-01 | 18700 |
| 152 | ACC_sub_R  | 0.008  | -0.530 | 0.545  | 0.274 | 0.029  | 0.000  | 9.77E-01 | 18700 |
| 153 | ACC_pre_L  | -0.116 | -1.590 | 1.358  | 0.752 | -0.154 | -0.001 | 8.77E-01 | 18700 |
| 154 | ACC_pre_R  | -0.069 | -1.489 | 1.351  | 0.724 | -0.095 | -0.001 | 9.24E-01 | 18700 |
| 155 | ACC_sup_L  | -1.368 | -2.970 | 0.234  | 0.817 | -1.674 | -0.012 | 9.42E-02 | 18700 |
| 156 | ACC_sup_R  | -1.104 | -2.763 | 0.556  | 0.847 | -1.303 | -0.010 | 1.92E-01 | 18700 |
| 157 | N_Acc_L    | 0.295  | -0.187 | 0.777  | 0.246 | 1.201  | 0.009  | 2.30E-01 | 18700 |
| 158 | N_Acc_R    | 0.188  | -0.229 | 0.605  | 0.213 | 0.883  | 0.006  | 3.77E-01 | 18700 |
| 159 | VTA_L      | 0.002  | -0.014 | 0.019  | 0.009 | 0.285  | 0.002  | 7.75E-01 | 18700 |
| 160 | VTA_R      | -0.003 | -0.018 | 0.012  | 0.008 | -0.370 | -0.003 | 7.11E-01 | 18700 |
| 161 | SN_pc_L    | 0.001  | -0.026 | 0.028  | 0.014 | 0.066  | 0.000  | 9.48E-01 | 18700 |
| 162 | SN_pc_R    | -0.013 | -0.049 | 0.023  | 0.018 | -0.722 | -0.005 | 4.71E-01 | 18700 |
| 163 | SN_pr_L    | -0.028 | -0.065 | 0.009  | 0.019 | -1.477 | -0.011 | 1.40E-01 | 18700 |
| 164 | SN_pr_R    | -0.026 | -0.068 | 0.015  | 0.021 | -1.243 | -0.009 | 2.14E-01 | 18700 |
| 165 | Red_N_L    | -0.007 | -0.052 | 0.039  | 0.023 | -0.280 | -0.002 | 7.79E-01 | 18700 |
| 166 | Red_N_R    | -0.032 | -0.081 | 0.018  | 0.025 | -1.247 | -0.009 | 2.12E-01 | 18700 |
| 167 | LC_L       | 0.015  | -0.002 | 0.032  | 0.009 | 1.731  | 0.013  | 8.34E-02 | 18700 |
| 168 | LC_R       | 0.014  | -0.005 | 0.033  | 0.009 | 1.484  | 0.011  | 1.38E-01 | 18700 |
| 169 | Raphe_D    | 0.012  | -0.054 | 0.078  | 0.034 | 0.361  | 0.003  | 7.18E-01 | 18700 |
| 170 | Raphe_M    | 0.019  | -0.001 | 0.039  | 0.010 | 1.862  | 0.014  | 6.26E-02 | 18700 |

**Table S3: Associations between grey matter volumes and diet phenotypes (baseline).**

| Number        | AAL 3 region         | beta     | 95%CI_l  | 95%CI_h  | se     | t      | r      | p        | df.e  | beta          | 95%CI_l | 95%CI_h | se     | t      | r     | p        | df.e  |
|---------------|----------------------|----------|----------|----------|--------|--------|--------|----------|-------|---------------|---------|---------|--------|--------|-------|----------|-------|
| Coffee intake |                      |          |          |          |        |        |        |          |       | Cereal intake |         |         |        |        |       |          |       |
| 0             | Total brain          | -308.583 | -377.049 | -240.118 | 34.930 | -8.834 | -0.064 | 1.09E-18 | 18834 | 270.579       | 221.143 | 320.016 | 25.221 | 10.728 | 0.078 | 8.97E-27 | 18852 |
| 1             | Precentral_L         | -6.832   | -9.243   | -4.421   | 1.230  | -5.554 | -0.040 | 2.83E-08 | 18834 | 4.739         | 2.996   | 6.481   | 0.889  | 5.331  | 0.039 | 9.88E-08 | 18852 |
| 2             | Precentral_R         | -6.251   | -8.460   | -4.042   | 1.127  | -5.546 | -0.040 | 2.96E-08 | 18834 | 5.073         | 3.477   | 6.669   | 0.814  | 6.231  | 0.045 | 4.72E-10 | 18852 |
| 3             | Frontal_Sup_2_L      | -9.211   | -11.754  | -6.669   | 1.297  | -7.101 | -0.052 | 1.29E-12 | 18834 | 6.777         | 4.939   | 8.616   | 0.938  | 7.226  | 0.053 | 5.16E-13 | 18852 |
| 4             | Frontal_Sup_2_R      | -10.428  | -13.231  | -7.626   | 1.430  | -7.293 | -0.053 | 3.15E-13 | 18834 | 8.147         | 6.122   | 10.173  | 1.033  | 7.885  | 0.057 | 3.32E-15 | 18852 |
| 5             | Frontal_Mid_2_L      | -8.593   | -11.264  | -5.921   | 1.363  | -6.304 | -0.046 | 2.96E-10 | 18834 | 5.395         | 3.463   | 7.327   | 0.986  | 5.473  | 0.040 | 4.47E-08 | 18852 |
| 6             | Frontal_Mid_2_R      | -10.513  | -13.536  | -7.490   | 1.542  | -6.817 | -0.050 | 9.61E-12 | 18834 | 8.012         | 5.828   | 10.196  | 1.114  | 7.190  | 0.052 | 6.74E-13 | 18852 |
| 7             | Frontal_Inf_Oper_L   | -1.972   | -2.762   | -1.182   | 0.403  | -4.893 | -0.036 | 9.99E-07 | 18834 | 1.672         | 1.101   | 2.243   | 0.291  | 5.742  | 0.042 | 9.48E-09 | 18852 |
| 8             | Frontal_Inf_Oper_R   | -2.830   | -3.821   | -1.840   | 0.505  | -5.600 | -0.041 | 2.18E-08 | 18834 | 1.999         | 1.283   | 2.715   | 0.365  | 5.475  | 0.040 | 4.44E-08 | 18852 |
| 9             | Frontal_Inf_Tri_L    | -4.246   | -5.923   | -2.569   | 0.855  | -4.963 | -0.036 | 6.99E-07 | 18834 | 3.774         | 2.562   | 4.985   | 0.618  | 6.105  | 0.044 | 1.05E-09 | 18852 |
| 10            | Frontal_Inf_Tri_R    | -3.699   | -5.015   | -2.382   | 0.672  | -5.505 | -0.040 | 3.73E-08 | 18834 | 3.086         | 2.135   | 4.038   | 0.485  | 6.359  | 0.046 | 2.08E-10 | 18852 |
| 11            | Frontal_Inf_Orb_2_L  | -1.062   | -1.563   | -0.560   | 0.256  | -4.150 | -0.030 | 3.33E-05 | 18834 | 1.161         | 0.798   | 1.523   | 0.185  | 6.281  | 0.046 | 3.44E-10 | 18852 |
| 12            | Frontal_Inf_Orb_2_R  | -1.516   | -2.040   | -0.992   | 0.267  | -5.670 | -0.041 | 1.45E-08 | 18834 | 1.365         | 0.987   | 1.744   | 0.193  | 7.068  | 0.051 | 1.62E-12 | 18852 |
| 13            | Rolandic_Oper_L      | -1.732   | -2.490   | -0.974   | 0.387  | -4.476 | -0.033 | 7.65E-06 | 18834 | 1.625         | 1.077   | 2.173   | 0.280  | 5.810  | 0.042 | 6.35E-09 | 18852 |
| 14            | Rolandic_Oper_R      | -3.131   | -4.216   | -2.046   | 0.553  | -5.658 | -0.041 | 1.56E-08 | 18834 | 2.623         | 1.839   | 3.407   | 0.400  | 6.558  | 0.048 | 5.60E-11 | 18852 |
| 15            | Supp_Motor_Area_L    | -4.703   | -6.507   | -2.898   | 0.920  | -5.109 | -0.037 | 3.27E-07 | 18834 | 2.588         | 1.283   | 3.892   | 0.665  | 3.889  | 0.028 | 1.01E-04 | 18852 |
| 16            | Supp_Motor_Area_R    | -5.213   | -7.206   | -3.220   | 1.017  | -5.127 | -0.037 | 2.97E-07 | 18834 | 3.375         | 1.934   | 4.816   | 0.735  | 4.591  | 0.033 | 4.43E-06 | 18852 |
| 17            | Olfactory_L          | -0.456   | -0.724   | -0.188   | 0.137  | -3.335 | -0.024 | 8.55E-04 | 18834 | 0.556         | 0.362   | 0.750   | 0.099  | 5.629  | 0.041 | 1.84E-08 | 18852 |
| 18            | Olfactory_R          | -0.507   | -0.775   | -0.238   | 0.137  | -3.692 | -0.027 | 2.23E-04 | 18834 | 0.471         | 0.277   | 0.665   | 0.099  | 4.753  | 0.035 | 2.02E-06 | 18852 |
| 19            | Frontal_Sup_Medial_L | -5.950   | -7.640   | -4.261   | 0.862  | -6.903 | -0.050 | 5.26E-12 | 18834 | 5.446         | 4.227   | 6.666   | 0.622  | 8.753  | 0.064 | 2.26E-18 | 18852 |
| 20            | Frontal_Sup_Medial_R | -4.447   | -5.676   | -3.218   | 0.627  | -7.092 | -0.052 | 1.36E-12 | 18834 | 3.398         | 2.510   | 4.287   | 0.453  | 7.499  | 0.055 | 6.69E-14 | 18852 |
| 21            | Frontal_Med_Orb_L    | -1.865   | -2.497   | -1.234   | 0.322  | -5.791 | -0.042 | 7.12E-09 | 18834 | 1.952         | 1.496   | 2.408   | 0.233  | 8.393  | 0.061 | 5.09E-17 | 18852 |
| 22            | Frontal_Med_Orb_R    | -2.219   | -2.995   | -1.443   | 0.396  | -5.606 | -0.041 | 2.10E-08 | 18834 | 2.393         | 1.833   | 2.954   | 0.286  | 8.374  | 0.061 | 5.94E-17 | 18852 |
| 23            | Rectus_L             | -1.631   | -2.285   | -0.978   | 0.334  | -4.891 | -0.036 | 1.01E-06 | 18834 | 1.860         | 1.388   | 2.333   | 0.241  | 7.724  | 0.056 | 1.18E-14 | 18852 |
| 24            | Rectus_R             | -1.505   | -2.110   | -0.900   | 0.309  | -4.876 | -0.036 | 1.09E-06 | 18834 | 1.706         | 1.269   | 2.142   | 0.223  | 7.655  | 0.056 | 2.03E-14 | 18852 |
| 25            | OFCmed_L             | -0.994   | -1.373   | -0.615   | 0.193  | -5.139 | -0.037 | 2.79E-07 | 18834 | 0.844         | 0.570   | 1.117   | 0.140  | 6.039  | 0.044 | 1.58E-09 | 18852 |
| 26            | OFCmed_R             | -1.060   | -1.502   | -0.618   | 0.225  | -4.705 | -0.034 | 2.56E-06 | 18834 | 0.876         | 0.557   | 1.195   | 0.163  | 5.383  | 0.039 | 7.42E-08 | 18852 |
| 27            | OFCant_L             | -0.985   | -1.423   | -0.546   | 0.224  | -4.404 | -0.032 | 1.07E-05 | 18834 | 0.696         | 0.379   | 1.013   | 0.162  | 4.309  | 0.031 | 1.65E-05 | 18852 |
| 28            | OFCant_R             | -1.213   | -1.792   | -0.634   | 0.295  | -4.109 | -0.030 | 4.00E-05 | 18834 | 1.470         | 1.052   | 1.888   | 0.213  | 6.896  | 0.050 | 5.54E-12 | 18852 |
| 29            | OFCpost_L            | -1.162   | -1.710   | -0.613   | 0.280  | -4.151 | -0.030 | 3.33E-05 | 18834 | 0.834         | 0.438   | 1.231   | 0.202  | 4.127  | 0.030 | 3.69E-05 | 18852 |
| 30            | OFCpost_R            | -1.090   | -1.597   | -0.583   | 0.259  | -4.213 | -0.031 | 2.53E-05 | 18834 | 1.189         | 0.823   | 1.556   | 0.187  | 6.368  | 0.046 | 1.96E-10 | 18852 |
| 31            | OFClat_L             | -0.378   | -0.563   | -0.193   | 0.094  | -4.004 | -0.029 | 6.26E-05 | 18834 | 0.377         | 0.243   | 0.511   | 0.068  | 5.525  | 0.040 | 3.34E-08 | 18852 |
| 32            | OFClat_R             | -0.393   | -0.550   | -0.237   | 0.080  | -4.932 | -0.036 | 8.21E-07 | 18834 | 0.485         | 0.372   | 0.598   | 0.058  | 8.425  | 0.061 | 3.85E-17 | 18852 |
| 33            | Insula_L             | -6.880   | -8.574   | -5.187   | 0.864  | -7.963 | -0.058 | 1.77E-15 | 18834 | 4.306         | 3.080   | 5.531   | 0.625  | 6.887  | 0.050 | 5.87E-12 | 18852 |
| 34            | Insula_R             | -6.721   | -8.372   | -5.071   | 0.842  | -7.982 | -0.058 | 1.53E-15 | 18834 | 4.792         | 3.599   | 5.986   | 0.609  | 7.869  | 0.057 | 3.75E-15 | 18852 |
| 37            | Cingulate_Mid_L      | -5.663   | -7.097   | -4.229   | 0.732  | -7.742 | -0.056 | 1.03E-14 | 18834 | 5.001         | 3.965   | 6.037   | 0.528  | 9.463  | 0.069 | 3.34E-21 | 18852 |
| 38            | Cingulate_Mid_R      | -5.685   | -7.213   | -4.157   | 0.780  | -7.290 | -0.053 | 3.21E-13 | 18834 | 5.304         | 4.200   | 6.408   | 0.563  | 9.416  | 0.068 | 5.21E-21 | 18852 |
| 39            | Cingulate_Post_L     | -0.587   | -1.025   | -0.149   | 0.224  | -2.625 | -0.019 | 8.67E-03 | 18834 | 0.663         | 0.347   | 0.980   | 0.161  | 4.106  | 0.030 | 4.04E-05 | 18852 |
| 40            | Cingulate_Post_R     | -0.187   | -0.430   | 0.056    | 0.124  | -1.510 | -0.011 | 1.31E-01 | 18834 | 0.217         | 0.042   | 0.393   | 0.090  | 2.424  | 0.018 | 1.54E-02 | 18852 |
| 41            | Hippocampus_L        | -0.710   | -1.419   | -0.001   | 0.362  | -1.963 | -0.014 | 4.96E-02 | 18834 | 1.518         | 1.006   | 2.030   | 0.261  | 5.812  | 0.042 | 6.26E-09 | 18852 |
| 42            | Hippocampus_R        | -0.627   | -1.363   | 0.108    | 0.375  | -1.672 | -0.012 | 9.44E-02 | 18834 | 1.131         | 0.600   | 1.663   | 0.271  | 4.175  | 0.030 | 2.99E-05 | 18852 |
| 43            | ParaHippocampal_L    | -0.932   | -1.561   | -0.302   | 0.321  | -2.899 | -0.021 | 3.74E-03 | 18834 | 1.475         | 1.020   | 1.930   | 0.232  | 6.360  | 0.046 | 2.07E-10 | 18852 |
| 44            | ParaHippocampal_R    | -1.168   | -1.963   | -0.373   | 0.406  | -2.879 | -0.021 | 3.99E-03 | 18834 | 1.910         | 1.336   | 2.484   | 0.293  | 6.523  | 0.047 | 7.04E-11 | 18852 |
| 45            | Amygdala_L           | -0.656   | -0.900   | -0.411   | 0.125  | -5.255 | -0.038 | 1.49E-07 | 18834 | 0.482         | 0.305   | 0.658   | 0.090  | 5.341  | 0.039 | 9.35E-08 | 18852 |
| 46            | Amygdala_R           | -0.774   | -1.024   | -0.524   | 0.128  | -6.062 | -0.044 | 1.37E-09 | 18834 | 0.521         | 0.340   | 0.702   | 0.092  | 5.645  | 0.041 | 1.67E-08 | 18852 |
| 47            | Calcarine_L          | -5.548   | -7.880   | -3.215   | 1.190  | -4.662 | -0.034 | 3.15E-06 | 18834 | 0.774         | -0.914  | 2.461   | 0.861  | 0.899  | 0.007 | 3.69E-01 | 18852 |

|    |                      |        |        |        |       |        |        |          |       |        |        |       |       |        |        |          |       |
|----|----------------------|--------|--------|--------|-------|--------|--------|----------|-------|--------|--------|-------|-------|--------|--------|----------|-------|
| 48 | Calcarine_R          | -4.380 | -6.329 | -2.431 | 0.994 | -4.405 | -0.032 | 1.06E-05 | 18834 | 1.132  | -0.278 | 2.541 | 0.719 | 1.574  | 0.011  | 1.16E-01 | 18852 |
| 49 | Cuneus_L             | -3.430 | -4.895 | -1.965 | 0.747 | -4.590 | -0.033 | 4.47E-06 | 18834 | 0.860  | -0.199 | 1.919 | 0.540 | 1.591  | 0.012  | 1.12E-01 | 18852 |
| 50 | Cuneus_R             | -2.807 | -3.927 | -1.686 | 0.572 | -4.911 | -0.036 | 9.16E-07 | 18834 | 1.291  | 0.481  | 2.101 | 0.413 | 3.124  | 0.023  | 1.79E-03 | 18852 |
| 51 | Lingual_L            | -2.995 | -4.399 | -1.590 | 0.717 | -4.179 | -0.030 | 2.94E-05 | 18834 | 0.843  | -0.172 | 1.859 | 0.518 | 1.628  | 0.012  | 1.04E-01 | 18852 |
| 52 | Lingual_R            | -2.330 | -3.801 | -0.859 | 0.751 | -3.104 | -0.023 | 1.91E-03 | 18834 | 1.580  | 0.517  | 2.643 | 0.542 | 2.913  | 0.021  | 3.58E-03 | 18852 |
| 53 | Occipital_Sup_L      | -2.293 | -3.258 | -1.328 | 0.492 | -4.656 | -0.034 | 3.24E-06 | 18834 | 1.395  | 0.697  | 2.092 | 0.356 | 3.918  | 0.029  | 8.96E-05 | 18852 |
| 54 | Occipital_Sup_R      | -2.548 | -3.595 | -1.502 | 0.534 | -4.773 | -0.035 | 1.83E-06 | 18834 | 1.786  | 1.030  | 2.543 | 0.386 | 4.629  | 0.034  | 3.70E-06 | 18852 |
| 55 | Occipital_Mid_L      | -3.547 | -5.810 | -1.285 | 1.154 | -3.073 | -0.022 | 2.12E-03 | 18834 | 1.127  | -0.509 | 2.762 | 0.835 | 1.350  | 0.010  | 1.77E-01 | 18852 |
| 56 | Occipital_Mid_R      | -2.448 | -4.023 | -0.873 | 0.804 | -3.046 | -0.022 | 2.32E-03 | 18834 | 0.966  | -0.173 | 2.105 | 0.581 | 1.663  | 0.012  | 9.63E-02 | 18852 |
| 57 | Occipital_Inf_L      | -1.021 | -1.772 | -0.271 | 0.383 | -2.668 | -0.019 | 7.64E-03 | 18834 | -0.173 | -0.716 | 0.369 | 0.277 | -0.626 | -0.005 | 5.31E-01 | 18852 |
| 58 | Occipital_Inf_R      | -0.510 | -1.378 | 0.358  | 0.443 | -1.152 | -0.008 | 2.49E-01 | 18834 | -0.013 | -0.640 | 0.614 | 0.320 | -0.041 | 0.000  | 9.67E-01 | 18852 |
| 59 | Fusiform_L           | -2.089 | -3.733 | -0.445 | 0.839 | -2.490 | -0.018 | 1.28E-02 | 18834 | 3.192  | 2.005  | 4.379 | 0.606 | 5.271  | 0.038  | 1.37E-07 | 18852 |
| 60 | Fusiform_R           | -3.112 | -4.919 | -1.305 | 0.922 | -3.376 | -0.025 | 7.37E-04 | 18834 | 3.605  | 2.300  | 4.909 | 0.665 | 5.417  | 0.039  | 6.12E-08 | 18852 |
| 61 | Postcentral_L        | -7.503 | -9.975 | -5.032 | 1.261 | -5.951 | -0.043 | 2.72E-09 | 18834 | 7.016  | 5.230  | 8.801 | 0.911 | 7.702  | 0.056  | 1.40E-14 | 18852 |
| 62 | Postcentral_R        | -5.354 | -7.888 | -2.821 | 1.293 | -4.142 | -0.030 | 3.46E-05 | 18834 | 6.145  | 4.316  | 7.974 | 0.933 | 6.584  | 0.048  | 4.69E-11 | 18852 |
| 63 | Parietal_Sup_L       | -3.289 | -4.714 | -1.865 | 0.727 | -4.525 | -0.033 | 6.08E-06 | 18834 | 0.631  | -0.398 | 1.661 | 0.525 | 1.202  | 0.009  | 2.29E-01 | 18852 |
| 64 | Parietal_Sup_R       | -2.405 | -3.669 | -1.141 | 0.645 | -3.730 | -0.027 | 1.92E-04 | 18834 | 0.832  | -0.081 | 1.746 | 0.466 | 1.786  | 0.013  | 7.41E-02 | 18852 |
| 65 | Parietal_Inf_L       | -6.005 | -7.868 | -4.141 | 0.951 | -6.316 | -0.046 | 2.74E-10 | 18834 | 4.355  | 3.008  | 5.703 | 0.687 | 6.337  | 0.046  | 2.39E-10 | 18852 |
| 66 | Parietal_Inf_R       | -2.630 | -3.839 | -1.422 | 0.617 | -4.265 | -0.031 | 2.01E-05 | 18834 | 2.973  | 2.100  | 3.846 | 0.446 | 6.673  | 0.049  | 2.57E-11 | 18852 |
| 67 | SupraMarginal_L      | -2.260 | -3.353 | -1.166 | 0.558 | -4.050 | -0.030 | 5.13E-05 | 18834 | 2.557  | 1.767  | 3.346 | 0.403 | 6.347  | 0.046  | 2.24E-10 | 18852 |
| 68 | SupraMarginal_R      | -3.075 | -4.623 | -1.527 | 0.790 | -3.893 | -0.028 | 9.92E-05 | 18834 | 5.033  | 3.917  | 6.149 | 0.570 | 8.836  | 0.064  | 1.08E-18 | 18852 |
| 69 | Angular_L            | -2.669 | -3.743 | -1.595 | 0.548 | -4.870 | -0.035 | 1.12E-06 | 18834 | 1.064  | 0.287  | 1.841 | 0.396 | 2.685  | 0.020  | 7.25E-03 | 18852 |
| 70 | Angular_R            | -2.699 | -4.138 | -1.259 | 0.734 | -3.674 | -0.027 | 2.39E-04 | 18834 | 1.805  | 0.764  | 2.845 | 0.531 | 3.400  | 0.025  | 6.76E-04 | 18852 |
| 71 | Precuneus_L          | -5.981 | -8.600 | -3.362 | 1.336 | -4.476 | -0.033 | 7.66E-06 | 18834 | 2.733  | 0.840  | 4.626 | 0.966 | 2.829  | 0.021  | 4.67E-03 | 18852 |
| 72 | Precuneus_R          | -5.339 | -7.671 | -3.007 | 1.190 | -4.488 | -0.033 | 7.24E-06 | 18834 | 2.572  | 0.886  | 4.258 | 0.860 | 2.991  | 0.022  | 2.79E-03 | 18852 |
| 73 | Paracentral_Lobule_L | -2.217 | -3.416 | -1.018 | 0.612 | -3.625 | -0.026 | 2.90E-04 | 18834 | 0.514  | -0.352 | 1.381 | 0.442 | 1.163  | 0.008  | 2.45E-01 | 18852 |
| 74 | Paracentral_Lobule_R | -1.357 | -2.215 | -0.498 | 0.438 | -3.096 | -0.023 | 1.96E-03 | 18834 | 0.642  | 0.021  | 1.263 | 0.317 | 2.027  | 0.015  | 4.27E-02 | 18852 |
| 75 | Caudate_L            | -1.177 | -2.134 | -0.220 | 0.488 | -2.410 | -0.018 | 1.59E-02 | 18834 | -0.270 | -0.963 | 0.422 | 0.353 | -0.766 | -0.006 | 4.44E-01 | 18852 |
| 76 | Caudate_R            | -1.791 | -2.875 | -0.706 | 0.553 | -3.235 | -0.024 | 1.22E-03 | 18834 | -0.297 | -1.081 | 0.488 | 0.400 | -0.742 | -0.005 | 4.58E-01 | 18852 |
| 77 | Putamen_L            | -4.237 | -5.690 | -2.784 | 0.741 | -5.715 | -0.042 | 1.11E-08 | 18834 | 3.374  | 2.324  | 4.424 | 0.536 | 6.298  | 0.046  | 3.09E-10 | 18852 |
| 78 | Putamen_R            | -4.869 | -6.348 | -3.389 | 0.755 | -6.451 | -0.047 | 1.14E-10 | 18834 | 3.382  | 2.312  | 4.452 | 0.546 | 6.196  | 0.045  | 5.90E-10 | 18852 |
| 79 | Pallidum_L           | -0.127 | -0.256 | 0.003  | 0.066 | -1.921 | -0.014 | 5.47E-02 | 18834 | 0.137  | 0.044  | 0.231 | 0.048 | 2.881  | 0.021  | 3.97E-03 | 18852 |
| 80 | Pallidum_R           | -0.227 | -0.369 | -0.085 | 0.072 | -3.131 | -0.023 | 1.75E-03 | 18834 | 0.140  | 0.037  | 0.243 | 0.052 | 2.677  | 0.019  | 7.44E-03 | 18852 |
| 83 | Heschl_L             | -0.842 | -1.104 | -0.580 | 0.134 | -6.301 | -0.046 | 3.03E-10 | 18834 | 0.541  | 0.352  | 0.731 | 0.097 | 5.604  | 0.041  | 2.13E-08 | 18852 |
| 84 | Heschl_R             | -0.779 | -1.071 | -0.486 | 0.149 | -5.216 | -0.038 | 1.85E-07 | 18834 | 0.647  | 0.435  | 0.858 | 0.108 | 5.994  | 0.044  | 2.09E-09 | 18852 |
| 85 | Temporal_Sup_L       | -6.502 | -8.391 | -4.613 | 0.964 | -6.745 | -0.049 | 1.57E-11 | 18834 | 4.234  | 2.868  | 5.601 | 0.697 | 6.074  | 0.044  | 1.27E-09 | 18852 |
| 86 | Temporal_Sup_R       | -5.729 | -7.822 | -3.636 | 1.068 | -5.366 | -0.039 | 8.16E-08 | 18834 | 6.288  | 4.777  | 7.799 | 0.771 | 8.157  | 0.059  | 3.65E-16 | 18852 |
| 87 | Temporal_Pole_Sup_L  | -2.412 | -3.308 | -1.516 | 0.457 | -5.277 | -0.038 | 1.33E-07 | 18834 | 1.995  | 1.348  | 2.643 | 0.330 | 6.042  | 0.044  | 1.55E-09 | 18852 |
| 88 | Temporal_Pole_Sup_R  | -2.774 | -3.717 | -1.831 | 0.481 | -5.765 | -0.042 | 8.31E-09 | 18834 | 2.058  | 1.377  | 2.740 | 0.348 | 5.922  | 0.043  | 3.23E-09 | 18852 |
| 89 | Temporal_Mid_L       | -6.771 | -9.925 | -3.617 | 1.609 | -4.208 | -0.031 | 2.59E-05 | 18834 | 7.475  | 5.197  | 9.753 | 1.162 | 6.432  | 0.047  | 1.29E-10 | 18852 |
| 90 | Temporal_Mid_R       | -6.978 | -9.777 | -4.179 | 1.428 | -4.886 | -0.036 | 1.04E-06 | 18834 | 6.090  | 4.067  | 8.112 | 1.032 | 5.902  | 0.043  | 3.65E-09 | 18852 |
| 91 | Temporal_Pole_Mid_L  | -1.058 | -1.812 | -0.305 | 0.385 | -2.752 | -0.020 | 5.93E-03 | 18834 | 1.261  | 0.716  | 1.805 | 0.278 | 4.540  | 0.033  | 5.67E-06 | 18852 |
| 92 | Temporal_Pole_Mid_R  | -1.950 | -2.866 | -1.035 | 0.467 | -4.178 | -0.030 | 2.96E-05 | 18834 | 2.115  | 1.455  | 2.776 | 0.337 | 6.277  | 0.046  | 3.53E-10 | 18852 |
| 93 | Temporal_Inf_L       | -2.577 | -4.745 | -0.409 | 1.106 | -2.330 | -0.017 | 1.98E-02 | 18834 | 2.246  | 0.679  | 3.812 | 0.799 | 2.809  | 0.020  | 4.97E-03 | 18852 |
| 94 | Temporal_Inf_R       | -4.778 | -7.142 | -2.414 | 1.206 | -3.962 | -0.029 | 7.46E-05 | 18834 | 2.253  | 0.545  | 3.961 | 0.871 | 2.585  | 0.019  | 9.74E-03 | 18852 |
| 95 | Cerebellum_Crus1_L   | -2.446 | -5.022 | 0.130  | 1.314 | -1.861 | -0.014 | 6.27E-02 | 18834 | 3.411  | 1.549  | 5.272 | 0.949 | 3.592  | 0.026  | 3.29E-04 | 18852 |
| 96 | Cerebellum_Crus1_R   | -3.231 | -5.858 | -0.605 | 1.340 | -2.412 | -0.018 | 1.59E-02 | 18834 | 3.886  | 1.988  | 5.783 | 0.968 | 4.014  | 0.029  | 5.98E-05 | 18852 |
| 97 | Cerebellum_Crus2_L   | -2.250 | -4.292 | -0.207 | 1.042 | -2.158 | -0.016 | 3.09E-02 | 18834 | 4.682  | 3.207  | 6.157 | 0.752 | 6.223  | 0.045  | 4.98E-10 | 18852 |
| 98 | Cerebellum_Crus2_R   | -1.529 | -3.418 | 0.360  | 0.964 | -1.586 | -0.012 | 1.13E-01 | 18834 | 4.545  | 3.181  | 5.908 | 0.696 | 6.534  | 0.048  | 6.58E-11 | 18852 |

|     |                  |        |        |        |       |        |        |          |       |        |        |        |       |        |        |          |       |
|-----|------------------|--------|--------|--------|-------|--------|--------|----------|-------|--------|--------|--------|-------|--------|--------|----------|-------|
| 99  | Cerebellum_3_L   | 0.092  | -0.046 | 0.229  | 0.070 | 1.309  | 0.010  | 1.91E-01 | 18834 | 0.202  | 0.103  | 0.301  | 0.050 | 3.998  | 0.029  | 6.42E-05 | 18852 |
| 100 | Cerebellum_3_R   | -0.083 | -0.268 | 0.102  | 0.094 | -0.880 | -0.006 | 3.79E-01 | 18834 | 0.271  | 0.137  | 0.405  | 0.068 | 3.977  | 0.029  | 7.00E-05 | 18852 |
| 101 | Cerebellum_4_5_L | 0.628  | -0.481 | 1.737  | 0.566 | 1.110  | 0.008  | 2.67E-01 | 18834 | 1.050  | 0.249  | 1.851  | 0.409 | 2.570  | 0.019  | 1.02E-02 | 18852 |
| 102 | Cerebellum_4_5_R | -0.162 | -1.065 | 0.742  | 0.461 | -0.351 | -0.003 | 7.25E-01 | 18834 | 1.268  | 0.615  | 1.920  | 0.333 | 3.809  | 0.028  | 1.40E-04 | 18852 |
| 103 | Cerebellum_6_L   | -0.678 | -2.596 | 1.240  | 0.979 | -0.693 | -0.005 | 4.88E-01 | 18834 | 2.402  | 1.016  | 3.787  | 0.707 | 3.397  | 0.025  | 6.81E-04 | 18852 |
| 104 | Cerebellum_6_R   | -1.189 | -3.209 | 0.832  | 1.031 | -1.153 | -0.008 | 2.49E-01 | 18834 | 3.343  | 1.884  | 4.802  | 0.744 | 4.492  | 0.033  | 7.11E-06 | 18852 |
| 105 | Cerebellum_7b_L  | -0.152 | -0.776 | 0.473  | 0.319 | -0.475 | -0.003 | 6.34E-01 | 18834 | 1.476  | 1.025  | 1.927  | 0.230 | 6.413  | 0.047  | 1.46E-10 | 18852 |
| 106 | Cerebellum_7b_R  | -0.415 | -1.034 | 0.204  | 0.316 | -1.315 | -0.010 | 1.88E-01 | 18834 | 1.777  | 1.330  | 2.224  | 0.228 | 7.801  | 0.057  | 6.47E-15 | 18852 |
| 107 | Cerebellum_8_L   | 1.237  | -0.747 | 3.221  | 1.012 | 1.222  | 0.009  | 2.22E-01 | 18834 | 3.627  | 2.194  | 5.060  | 0.731 | 4.961  | 0.036  | 7.08E-07 | 18852 |
| 108 | Cerebellum_8_R   | 0.094  | -2.487 | 2.676  | 1.317 | 0.072  | 0.001  | 9.43E-01 | 18834 | 6.495  | 4.631  | 8.359  | 0.951 | 6.830  | 0.050  | 8.75E-12 | 18852 |
| 109 | Cerebellum_9_L   | 1.835  | 0.715  | 2.956  | 0.572 | 3.210  | 0.023  | 1.33E-03 | 18834 | 0.879  | 0.069  | 1.690  | 0.413 | 2.126  | 0.015  | 3.35E-02 | 18852 |
| 110 | Cerebellum_9_R   | 1.846  | 0.744  | 2.947  | 0.562 | 3.284  | 0.024  | 1.02E-03 | 18834 | 0.863  | 0.066  | 1.659  | 0.406 | 2.123  | 0.015  | 3.38E-02 | 18852 |
| 111 | Cerebellum_10_L  | 0.038  | -0.042 | 0.117  | 0.041 | 0.935  | 0.007  | 3.50E-01 | 18834 | -0.012 | -0.069 | 0.046  | 0.029 | -0.399 | -0.003 | 6.90E-01 | 18852 |
| 112 | Cerebellum_10_R  | 0.043  | -0.040 | 0.125  | 0.042 | 1.011  | 0.007  | 3.12E-01 | 18834 | 0.013  | -0.047 | 0.073  | 0.030 | 0.430  | 0.003  | 6.67E-01 | 18852 |
| 113 | Vermis_1_2       | -0.014 | -0.066 | 0.038  | 0.026 | -0.528 | -0.004 | 5.98E-01 | 18834 | 0.087  | 0.050  | 0.124  | 0.019 | 4.562  | 0.033  | 5.09E-06 | 18852 |
| 114 | Vermis_3         | 0.076  | -0.130 | 0.281  | 0.105 | 0.720  | 0.005  | 4.71E-01 | 18834 | 0.364  | 0.216  | 0.513  | 0.076 | 4.811  | 0.035  | 1.51E-06 | 18852 |
| 115 | Vermis_4_5       | 0.743  | 0.139  | 1.347  | 0.308 | 2.412  | 0.018  | 1.59E-02 | 18834 | 0.418  | -0.018 | 0.855  | 0.223 | 1.878  | 0.014  | 6.03E-02 | 18852 |
| 116 | Vermis_6         | 0.434  | 0.098  | 0.770  | 0.172 | 2.530  | 0.018  | 1.14E-02 | 18834 | 0.066  | -0.177 | 0.309  | 0.124 | 0.532  | 0.004  | 5.94E-01 | 18852 |
| 117 | Vermis_7         | 0.218  | 0.027  | 0.408  | 0.097 | 2.243  | 0.016  | 2.49E-02 | 18834 | 0.109  | -0.028 | 0.247  | 0.070 | 1.559  | 0.011  | 1.19E-01 | 18852 |
| 118 | Vermis_8         | 0.503  | 0.190  | 0.815  | 0.159 | 3.155  | 0.023  | 1.61E-03 | 18834 | 0.135  | -0.091 | 0.361  | 0.115 | 1.172  | 0.009  | 2.41E-01 | 18852 |
| 119 | Vermis_9         | 0.413  | 0.160  | 0.666  | 0.129 | 3.195  | 0.023  | 1.40E-03 | 18834 | 0.266  | 0.083  | 0.450  | 0.093 | 2.852  | 0.021  | 4.35E-03 | 18852 |
| 120 | Vermis_10        | 0.061  | -0.010 | 0.131  | 0.036 | 1.683  | 0.012  | 9.24E-02 | 18834 | 0.026  | -0.025 | 0.077  | 0.026 | 0.987  | 0.007  | 3.24E-01 | 18852 |
| 121 | Thal_AV_L        | -0.055 | -0.083 | -0.027 | 0.014 | -3.818 | -0.028 | 1.35E-04 | 18834 | 0.032  | 0.011  | 0.052  | 0.010 | 3.046  | 0.022  | 2.32E-03 | 18852 |
| 122 | Thal_AV_R        | -0.077 | -0.117 | -0.037 | 0.021 | -3.746 | -0.027 | 1.80E-04 | 18834 | 0.045  | 0.016  | 0.074  | 0.015 | 3.003  | 0.022  | 2.68E-03 | 18852 |
| 123 | Thal_LP_L        | -0.080 | -0.111 | -0.049 | 0.016 | -5.008 | -0.036 | 5.56E-07 | 18834 | 0.074  | 0.051  | 0.096  | 0.012 | 6.385  | 0.046  | 1.75E-10 | 18852 |
| 124 | Thal_LP_R        | -0.135 | -0.175 | -0.094 | 0.021 | -6.482 | -0.047 | 9.28E-11 | 18834 | 0.107  | 0.078  | 0.137  | 0.015 | 7.148  | 0.052  | 9.15E-13 | 18852 |
| 125 | Thal_VA_L        | 0.001  | -0.032 | 0.035  | 0.017 | 0.085  | 0.001  | 9.32E-01 | 18834 | -0.026 | -0.051 | -0.002 | 0.012 | -2.152 | -0.016 | 3.14E-02 | 18852 |
| 126 | Thal_VA_R        | 0.004  | -0.037 | 0.045  | 0.021 | 0.178  | 0.001  | 8.59E-01 | 18834 | -0.021 | -0.050 | 0.009  | 0.015 | -1.364 | -0.010 | 1.73E-01 | 18852 |
| 127 | Thal_VL_L        | -0.111 | -0.206 | -0.015 | 0.049 | -2.278 | -0.017 | 2.27E-02 | 18834 | 0.111  | 0.042  | 0.180  | 0.035 | 3.169  | 0.023  | 1.53E-03 | 18852 |
| 128 | Thal_VL_R        | -0.267 | -0.394 | -0.141 | 0.064 | -4.153 | -0.030 | 3.29E-05 | 18834 | 0.232  | 0.140  | 0.323  | 0.047 | 4.979  | 0.036  | 6.44E-07 | 18852 |
| 129 | Thal_VPL_L       | -0.269 | -0.382 | -0.156 | 0.058 | -4.660 | -0.034 | 3.19E-06 | 18834 | 0.271  | 0.189  | 0.352  | 0.042 | 6.489  | 0.047  | 8.88E-11 | 18852 |
| 130 | Thal_VPL_R       | -0.392 | -0.511 | -0.273 | 0.061 | -6.462 | -0.047 | 1.06E-10 | 18834 | 0.290  | 0.204  | 0.376  | 0.044 | 6.609  | 0.048  | 3.96E-11 | 18852 |
| 131 | Thal_IL_L        | -0.195 | -0.244 | -0.147 | 0.025 | -7.830 | -0.057 | 5.15E-15 | 18834 | 0.146  | 0.111  | 0.182  | 0.018 | 8.109  | 0.059  | 5.40E-16 | 18852 |
| 132 | Thal_IL_R        | -0.262 | -0.317 | -0.206 | 0.028 | -9.253 | -0.067 | 2.42E-20 | 18834 | 0.168  | 0.128  | 0.208  | 0.020 | 8.217  | 0.060  | 2.22E-16 | 18852 |
| 133 | Thal_Re_L        | 0.000  | 0.000  | 0.000  | 0.000 | -0.216 | -0.002 | 8.29E-01 | 18834 | 0.000  | 0.000  | 0.000  | 0.000 | 2.924  | 0.021  | 3.46E-03 | 18852 |
| 134 | Thal_Re_R        | -0.003 | -0.005 | -0.001 | 0.001 | -3.688 | -0.027 | 2.26E-04 | 18834 | 0.003  | 0.002  | 0.004  | 0.001 | 4.756  | 0.035  | 1.99E-06 | 18852 |
| 135 | Thal_MDm_L       | -1.774 | -2.136 | -1.412 | 0.185 | -9.605 | -0.070 | 8.52E-22 | 18834 | 1.162  | 0.901  | 1.424  | 0.134 | 8.704  | 0.063  | 3.46E-18 | 18852 |
| 136 | Thal_MDm_R       | -2.133 | -2.554 | -1.713 | 0.215 | -9.943 | -0.072 | 3.09E-23 | 18834 | 1.285  | 0.981  | 1.590  | 0.155 | 8.282  | 0.060  | 1.29E-16 | 18852 |
| 137 | Thal_MDl_L       | -0.285 | -0.348 | -0.222 | 0.032 | -8.911 | -0.065 | 5.50E-19 | 18834 | 0.213  | 0.168  | 0.258  | 0.023 | 9.210  | 0.067  | 3.60E-20 | 18852 |
| 138 | Thal_MDl_R       | -0.347 | -0.418 | -0.275 | 0.036 | -9.540 | -0.069 | 1.60E-21 | 18834 | 0.230  | 0.178  | 0.281  | 0.026 | 8.749  | 0.064  | 2.32E-18 | 18852 |
| 139 | Thal_LGN_L       | -0.012 | -0.022 | -0.002 | 0.005 | -2.469 | -0.018 | 1.36E-02 | 18834 | 0.019  | 0.012  | 0.026  | 0.004 | 5.440  | 0.040  | 5.38E-08 | 18852 |
| 140 | Thal_LGN_R       | -0.038 | -0.058 | -0.017 | 0.010 | -3.635 | -0.026 | 2.79E-04 | 18834 | 0.057  | 0.042  | 0.071  | 0.007 | 7.604  | 0.055  | 3.00E-14 | 18852 |
| 141 | Thal_MGN_L       | -0.047 | -0.064 | -0.030 | 0.009 | -5.384 | -0.039 | 7.39E-08 | 18834 | 0.055  | 0.042  | 0.067  | 0.006 | 8.697  | 0.063  | 3.68E-18 | 18852 |
| 142 | Thal_MGN_R       | -0.061 | -0.080 | -0.043 | 0.009 | -6.487 | -0.047 | 8.97E-11 | 18834 | 0.056  | 0.042  | 0.069  | 0.007 | 8.184  | 0.060  | 2.92E-16 | 18852 |
| 143 | Thal_PuA_L       | -0.060 | -0.080 | -0.039 | 0.010 | -5.810 | -0.042 | 6.35E-09 | 18834 | 0.064  | 0.049  | 0.078  | 0.007 | 8.596  | 0.062  | 8.92E-18 | 18852 |
| 144 | Thal_PuA_R       | -0.150 | -0.191 | -0.108 | 0.021 | -7.029 | -0.051 | 2.15E-12 | 18834 | 0.129  | 0.099  | 0.159  | 0.015 | 8.382  | 0.061  | 5.55E-17 | 18852 |
| 145 | Thal_PuM_L       | -1.577 | -1.976 | -1.178 | 0.204 | -7.749 | -0.056 | 9.70E-15 | 18834 | 1.211  | 0.923  | 1.499  | 0.147 | 8.232  | 0.060  | 1.96E-16 | 18852 |
| 146 | Thal_PuM_R       | -2.114 | -2.611 | -1.618 | 0.253 | -8.343 | -0.061 | 7.77E-17 | 18834 | 1.431  | 1.072  | 1.790  | 0.183 | 7.808  | 0.057  | 6.13E-15 | 18852 |
| 147 | Thal_PuL_L       | -0.308 | -0.381 | -0.235 | 0.037 | -8.295 | -0.060 | 1.16E-16 | 18834 | 0.226  | 0.173  | 0.278  | 0.027 | 8.412  | 0.061  | 4.33E-17 | 18852 |

|     |            |        |        |        |       |        |        |          |       |       |        |       |       |       |       |          |       |
|-----|------------|--------|--------|--------|-------|--------|--------|----------|-------|-------|--------|-------|-------|-------|-------|----------|-------|
| 148 | Thal_PuL_R | -0.527 | -0.643 | -0.411 | 0.059 | -8.932 | -0.065 | 4.56E-19 | 18834 | 0.342 | 0.259  | 0.426 | 0.043 | 8.020 | 0.058 | 1.12E-15 | 18852 |
| 149 | Thal_PuL_L | -0.035 | -0.055 | -0.015 | 0.010 | -3.477 | -0.025 | 5.09E-04 | 18834 | 0.032 | 0.018  | 0.046 | 0.007 | 4.403 | 0.032 | 1.07E-05 | 18852 |
| 150 | Thal_PuL_R | -0.053 | -0.079 | -0.027 | 0.013 | -3.974 | -0.029 | 7.08E-05 | 18834 | 0.042 | 0.023  | 0.061 | 0.010 | 4.363 | 0.032 | 1.29E-05 | 18852 |
| 151 | ACC_sub_L  | -0.334 | -0.562 | -0.105 | 0.117 | -2.863 | -0.021 | 4.20E-03 | 18834 | 0.305 | 0.140  | 0.471 | 0.084 | 3.624 | 0.026 | 2.91E-04 | 18852 |
| 152 | ACC_sub_R  | -0.351 | -0.564 | -0.137 | 0.109 | -3.218 | -0.023 | 1.29E-03 | 18834 | 0.224 | 0.070  | 0.379 | 0.079 | 2.846 | 0.021 | 4.43E-03 | 18852 |
| 153 | ACC_pre_L  | -1.548 | -2.134 | -0.963 | 0.299 | -5.182 | -0.038 | 2.22E-07 | 18834 | 1.572 | 1.148  | 1.995 | 0.216 | 7.280 | 0.053 | 3.46E-13 | 18852 |
| 154 | ACC_pre_R  | -1.413 | -1.977 | -0.849 | 0.288 | -4.909 | -0.036 | 9.25E-07 | 18834 | 1.296 | 0.889  | 1.704 | 0.208 | 6.232 | 0.045 | 4.69E-10 | 18852 |
| 155 | ACC_sup_L  | -1.919 | -2.555 | -1.283 | 0.324 | -5.915 | -0.043 | 3.37E-09 | 18834 | 1.494 | 1.034  | 1.954 | 0.235 | 6.367 | 0.046 | 1.98E-10 | 18852 |
| 156 | ACC_sup_R  | -1.032 | -1.691 | -0.372 | 0.336 | -3.067 | -0.022 | 2.16E-03 | 18834 | 0.865 | 0.388  | 1.342 | 0.243 | 3.557 | 0.026 | 3.76E-04 | 18852 |
| 157 | N_Acc_L    | -0.335 | -0.527 | -0.144 | 0.098 | -3.428 | -0.025 | 6.09E-04 | 18834 | 0.388 | 0.250  | 0.527 | 0.071 | 5.496 | 0.040 | 3.94E-08 | 18852 |
| 158 | N_Acc_R    | -0.333 | -0.499 | -0.167 | 0.085 | -3.938 | -0.029 | 8.25E-05 | 18834 | 0.325 | 0.205  | 0.445 | 0.061 | 5.317 | 0.039 | 1.07E-07 | 18852 |
| 159 | VTA_L      | -0.014 | -0.020 | -0.007 | 0.003 | -3.962 | -0.029 | 7.45E-05 | 18834 | 0.014 | 0.009  | 0.018 | 0.002 | 5.485 | 0.040 | 4.20E-08 | 18852 |
| 160 | VTA_R      | -0.013 | -0.019 | -0.007 | 0.003 | -4.101 | -0.030 | 4.12E-05 | 18834 | 0.014 | 0.010  | 0.018 | 0.002 | 6.308 | 0.046 | 2.89E-10 | 18852 |
| 161 | SN_pc_L    | -0.022 | -0.033 | -0.011 | 0.006 | -3.953 | -0.029 | 7.73E-05 | 18834 | 0.019 | 0.011  | 0.026 | 0.004 | 4.648 | 0.034 | 3.38E-06 | 18852 |
| 162 | SN_pc_R    | -0.035 | -0.049 | -0.021 | 0.007 | -4.836 | -0.035 | 1.33E-06 | 18834 | 0.028 | 0.017  | 0.038 | 0.005 | 5.259 | 0.038 | 1.46E-07 | 18852 |
| 163 | SN_pr_L    | -0.014 | -0.028 | 0.001  | 0.008 | -1.814 | -0.013 | 6.97E-02 | 18834 | 0.016 | 0.005  | 0.026 | 0.005 | 2.922 | 0.021 | 3.48E-03 | 18852 |
| 164 | SN_pr_R    | -0.029 | -0.045 | -0.012 | 0.008 | -3.436 | -0.025 | 5.91E-04 | 18834 | 0.019 | 0.007  | 0.031 | 0.006 | 3.127 | 0.023 | 1.77E-03 | 18852 |
| 165 | Red_N_L    | -0.030 | -0.049 | -0.012 | 0.009 | -3.294 | -0.024 | 9.89E-04 | 18834 | 0.037 | 0.024  | 0.050 | 0.007 | 5.533 | 0.040 | 3.19E-08 | 18852 |
| 166 | Red_N_R    | -0.035 | -0.055 | -0.015 | 0.010 | -3.490 | -0.025 | 4.85E-04 | 18834 | 0.040 | 0.025  | 0.054 | 0.007 | 5.463 | 0.040 | 4.74E-08 | 18852 |
| 167 | LC_L       | -0.002 | -0.009 | 0.004  | 0.003 | -0.720 | -0.005 | 4.71E-01 | 18834 | 0.003 | -0.002 | 0.008 | 0.002 | 1.301 | 0.009 | 1.93E-01 | 18852 |
| 168 | LC_R       | -0.002 | -0.009 | 0.005  | 0.004 | -0.547 | -0.004 | 5.84E-01 | 18834 | 0.003 | -0.002 | 0.009 | 0.003 | 1.166 | 0.008 | 2.44E-01 | 18852 |
| 169 | Raphe_D    | -0.068 | -0.094 | -0.041 | 0.013 | -5.040 | -0.037 | 4.70E-07 | 18834 | 0.080 | 0.061  | 0.099 | 0.010 | 8.234 | 0.060 | 1.93E-16 | 18852 |
| 170 | Raphe_M    | -0.010 | -0.018 | -0.002 | 0.004 | -2.361 | -0.017 | 1.82E-02 | 18834 | 0.013 | 0.008  | 0.019 | 0.003 | 4.545 | 0.033 | 5.53E-06 | 18852 |

|        |                      | Tea intake |         |         |        |        |        |          |       | Water intake |          |         |        |        |        |          |       |
|--------|----------------------|------------|---------|---------|--------|--------|--------|----------|-------|--------------|----------|---------|--------|--------|--------|----------|-------|
| Number | AAL 3 region         | beta       | 95%CI l | 95%CI h | se     | t      | r      | p        | df.e  | beta         | 95%CI l  | 95%CI h | se     | t      | r      | p        | df.e  |
| 0      | Total brain          | 15.805     | -35.995 | 67.604  | 26.427 | 0.598  | 0.004  | 5.50E-01 | 18775 | -117.015     | -184.464 | -49.565 | 34.411 | -3.400 | -0.025 | 6.74E-04 | 18750 |
| 1      | Precentral_L         | 0.233      | -1.589  | 2.054   | 0.929  | 0.250  | 0.002  | 8.02E-01 | 18775 | -1.425       | -3.797   | 0.948   | 1.210  | -1.177 | -0.009 | 2.39E-01 | 18750 |
| 2      | Precentral_R         | 1.040      | -0.630  | 2.709   | 0.852  | 1.221  | 0.009  | 2.22E-01 | 18775 | -2.556       | -4.730   | -0.382  | 1.109  | -2.305 | -0.017 | 2.12E-02 | 18750 |
| 3      | Frontal_Sup_2_L      | 0.733      | -1.190  | 2.656   | 0.981  | 0.747  | 0.005  | 4.55E-01 | 18775 | -2.967       | -5.474   | -0.461  | 1.279  | -2.320 | -0.017 | 2.03E-02 | 18750 |
| 4      | Frontal_Sup_2_R      | 1.629      | -0.492  | 3.749   | 1.082  | 1.505  | 0.011  | 1.32E-01 | 18775 | -2.388       | -5.151   | 0.375   | 1.410  | -1.694 | -0.012 | 9.03E-02 | 18750 |
| 5      | Frontal_Mid_2_L      | -0.059     | -2.079  | 1.961   | 1.031  | -0.057 | 0.000  | 9.55E-01 | 18775 | -0.584       | -3.217   | 2.050   | 1.344  | -0.434 | -0.003 | 6.64E-01 | 18750 |
| 6      | Frontal_Mid_2_R      | 0.682      | -1.604  | 2.968   | 1.166  | 0.585  | 0.004  | 5.59E-01 | 18775 | -1.831       | -4.810   | 1.149   | 1.520  | -1.204 | -0.009 | 2.28E-01 | 18750 |
| 7      | Frontal_Inf_Oper_L   | 0.024      | -0.572  | 0.621   | 0.304  | 0.080  | 0.001  | 9.36E-01 | 18775 | -1.009       | -1.786   | -0.233  | 0.396  | -2.547 | -0.019 | 1.09E-02 | 18750 |
| 8      | Frontal_Inf_Oper_R   | -0.184     | -0.933  | 0.564   | 0.382  | -0.483 | -0.004 | 6.29E-01 | 18775 | -1.334       | -2.309   | -0.359  | 0.498  | -2.682 | -0.020 | 7.33E-03 | 18750 |
| 9      | Frontal_Inf_Tri_L    | 0.083      | -1.185  | 1.351   | 0.647  | 0.129  | 0.001  | 8.98E-01 | 18775 | -1.812       | -3.464   | -0.161  | 0.842  | -2.151 | -0.016 | 3.15E-02 | 18750 |
| 10     | Frontal_Inf_Tri_R    | 0.152      | -0.844  | 1.147   | 0.508  | 0.298  | 0.002  | 7.65E-01 | 18775 | -1.357       | -2.654   | -0.061  | 0.661  | -2.052 | -0.015 | 4.01E-02 | 18750 |
| 11     | Frontal_Inf_Orb_2_L  | -0.153     | -0.532  | 0.226   | 0.193  | -0.790 | -0.006 | 4.30E-01 | 18775 | -0.253       | -0.747   | 0.240   | 0.252  | -1.005 | -0.007 | 3.15E-01 | 18750 |
| 12     | Frontal_Inf_Orb_2_R  | -0.099     | -0.496  | 0.297   | 0.202  | -0.492 | -0.004 | 6.23E-01 | 18775 | -0.414       | -0.930   | 0.103   | 0.263  | -1.571 | -0.011 | 1.16E-01 | 18750 |
| 13     | Rolandic_Oper_L      | -0.126     | -0.699  | 0.448   | 0.293  | -0.429 | -0.003 | 6.68E-01 | 18775 | -0.607       | -1.353   | 0.140   | 0.381  | -1.593 | -0.012 | 1.11E-01 | 18750 |
| 14     | Rolandic_Oper_R      | 1.061      | 0.241   | 1.881   | 0.418  | 2.535  | 0.018  | 1.13E-02 | 18775 | -1.129       | -2.197   | -0.061  | 0.545  | -2.073 | -0.015 | 3.82E-02 | 18750 |
| 15     | Supp_Motor_Area_L    | -0.116     | -1.478  | 1.247   | 0.695  | -0.167 | -0.001 | 8.68E-01 | 18775 | -0.501       | -2.277   | 1.275   | 0.906  | -0.553 | -0.004 | 5.80E-01 | 18750 |
| 16     | Supp_Motor_Area_R    | -0.337     | -1.843  | 1.168   | 0.768  | -0.439 | -0.003 | 6.61E-01 | 18775 | -0.027       | -1.990   | 1.936   | 1.002  | -0.027 | 0.000  | 9.79E-01 | 18750 |
| 17     | Olfactory_L          | -0.095     | -0.297  | 0.108   | 0.103  | -0.917 | -0.007 | 3.59E-01 | 18775 | -0.273       | -0.537   | -0.009  | 0.135  | -2.030 | -0.015 | 4.24E-02 | 18750 |
| 18     | Olfactory_R          | -0.136     | -0.339  | 0.067   | 0.104  | -1.312 | -0.010 | 1.90E-01 | 18775 | -0.367       | -0.631   | -0.102  | 0.135  | -2.717 | -0.020 | 6.59E-03 | 18750 |
| 19     | Frontal_Sup_Medial_L | -0.854     | -2.132  | 0.424   | 0.652  | -1.309 | -0.010 | 1.90E-01 | 18775 | -1.698       | -3.362   | -0.034  | 0.849  | -2.000 | -0.015 | 4.56E-02 | 18750 |
| 20     | Frontal_Sup_Medial_R | -0.529     | -1.459  | 0.401   | 0.475  | -1.115 | -0.008 | 2.65E-01 | 18775 | -1.305       | -2.516   | -0.094  | 0.618  | -2.112 | -0.015 | 3.47E-02 | 18750 |
| 21     | Frontal_Med_Orb_L    | -0.093     | -0.570  | 0.385   | 0.244  | -0.381 | -0.003 | 7.03E-01 | 18775 | -0.434       | -1.055   | 0.188   | 0.317  | -1.367 | -0.010 | 1.72E-01 | 18750 |
| 22     | Frontal_Med_Orb_R    | 0.092      | -0.495  | 0.679   | 0.299  | 0.308  | 0.002  | 7.58E-01 | 18775 | -0.747       | -1.511   | 0.017   | 0.390  | -1.916 | -0.014 | 5.54E-02 | 18750 |
| 23     | Rectus_L             | 0.110      | -0.384  | 0.605   | 0.252  | 0.438  | 0.003  | 6.61E-01 | 18775 | -0.353       | -0.997   | 0.290   | 0.328  | -1.075 | -0.008 | 2.82E-01 | 18750 |

|    |                      |        |        |       |       |        |        |          |       |        |        |        |       |        |        |          |       |
|----|----------------------|--------|--------|-------|-------|--------|--------|----------|-------|--------|--------|--------|-------|--------|--------|----------|-------|
| 24 | Rectus_R             | -0.041 | -0.498 | 0.416 | 0.233 | -0.177 | -0.001 | 8.60E-01 | 18775 | -0.461 | -1.056 | 0.135  | 0.304 | -1.516 | -0.011 | 1.29E-01 | 18750 |
| 25 | OFCmed_L             | -0.039 | -0.326 | 0.247 | 0.146 | -0.269 | -0.002 | 7.88E-01 | 18775 | -0.323 | -0.696 | 0.051  | 0.190 | -1.694 | -0.012 | 9.02E-02 | 18750 |
| 26 | OFCmed_R             | -0.159 | -0.492 | 0.175 | 0.170 | -0.933 | -0.007 | 3.51E-01 | 18775 | -0.581 | -1.015 | -0.146 | 0.222 | -2.617 | -0.019 | 8.87E-03 | 18750 |
| 27 | OFCant_L             | 0.017  | -0.314 | 0.348 | 0.169 | 0.101  | 0.001  | 9.20E-01 | 18775 | -0.589 | -1.020 | -0.158 | 0.220 | -2.679 | -0.020 | 7.40E-03 | 18750 |
| 28 | OFCant_R             | 0.138  | -0.299 | 0.575 | 0.223 | 0.619  | 0.005  | 5.36E-01 | 18775 | -1.077 | -1.647 | -0.508 | 0.291 | -3.709 | -0.027 | 2.09E-04 | 18750 |
| 29 | OFCpost_L            | -0.015 | -0.429 | 0.399 | 0.211 | -0.070 | -0.001 | 9.44E-01 | 18775 | -0.686 | -1.226 | -0.146 | 0.275 | -2.490 | -0.018 | 1.28E-02 | 18750 |
| 30 | OFCpost_R            | 0.039  | -0.345 | 0.422 | 0.196 | 0.198  | 0.001  | 8.43E-01 | 18775 | -0.699 | -1.198 | -0.199 | 0.255 | -2.743 | -0.020 | 6.09E-03 | 18750 |
| 31 | OFClat_L             | -0.049 | -0.188 | 0.091 | 0.071 | -0.681 | -0.005 | 4.96E-01 | 18775 | -0.174 | -0.357 | 0.008  | 0.093 | -1.875 | -0.014 | 6.08E-02 | 18750 |
| 32 | OFClat_R             | -0.053 | -0.171 | 0.066 | 0.060 | -0.872 | -0.006 | 3.83E-01 | 18775 | -0.254 | -0.408 | -0.100 | 0.078 | -3.236 | -0.024 | 1.22E-03 | 18750 |
| 33 | Insula_L             | 0.128  | -1.155 | 1.410 | 0.654 | 0.195  | 0.001  | 8.45E-01 | 18775 | -2.109 | -3.779 | -0.440 | 0.852 | -2.477 | -0.018 | 1.33E-02 | 18750 |
| 34 | Insula_R             | 0.283  | -0.966 | 1.533 | 0.638 | 0.444  | 0.003  | 6.57E-01 | 18775 | -2.700 | -4.326 | -1.073 | 0.830 | -3.253 | -0.024 | 1.14E-03 | 18750 |
| 37 | Cingulate_Mid_L      | 0.612  | -0.473 | 1.697 | 0.554 | 1.105  | 0.008  | 2.69E-01 | 18775 | -1.431 | -2.843 | -0.019 | 0.720 | -1.986 | -0.015 | 4.70E-02 | 18750 |
| 38 | Cingulate_Mid_R      | 0.488  | -0.669 | 1.644 | 0.590 | 0.826  | 0.006  | 4.09E-01 | 18775 | -1.285 | -2.790 | 0.220  | 0.768 | -1.673 | -0.012 | 9.43E-02 | 18750 |
| 39 | Cingulate_Post_L     | 0.176  | -0.155 | 0.507 | 0.169 | 1.041  | 0.008  | 2.98E-01 | 18775 | -0.573 | -1.004 | -0.142 | 0.220 | -2.605 | -0.019 | 9.20E-03 | 18750 |
| 40 | Cingulate_Post_R     | 0.091  | -0.093 | 0.274 | 0.094 | 0.966  | 0.007  | 3.34E-01 | 18775 | -0.265 | -0.504 | -0.026 | 0.122 | -2.169 | -0.016 | 3.01E-02 | 18750 |
| 41 | Hippocampus_L        | 0.008  | -0.527 | 0.544 | 0.273 | 0.029  | 0.000  | 9.76E-01 | 18775 | -0.756 | -1.452 | -0.060 | 0.355 | -2.129 | -0.016 | 3.32E-02 | 18750 |
| 42 | Hippocampus_R        | -0.141 | -0.697 | 0.414 | 0.283 | -0.498 | -0.004 | 6.19E-01 | 18775 | -0.400 | -1.123 | 0.323  | 0.369 | -1.085 | -0.008 | 2.78E-01 | 18750 |
| 43 | ParaHippocampa_L     | 0.267  | -0.209 | 0.742 | 0.243 | 1.099  | 0.008  | 2.72E-01 | 18775 | -0.612 | -1.230 | 0.007  | 0.315 | -1.939 | -0.014 | 5.25E-02 | 18750 |
| 44 | ParaHippocampa_R     | 0.147  | -0.454 | 0.747 | 0.306 | 0.479  | 0.003  | 6.32E-01 | 18775 | -0.417 | -1.199 | 0.364  | 0.399 | -1.047 | -0.008 | 2.95E-01 | 18750 |
| 45 | Amygdala_L           | 0.093  | -0.091 | 0.278 | 0.094 | 0.990  | 0.007  | 3.22E-01 | 18775 | -0.370 | -0.610 | -0.130 | 0.123 | -3.019 | -0.022 | 2.54E-03 | 18750 |
| 46 | Amygdala_R           | 0.087  | -0.102 | 0.276 | 0.097 | 0.904  | 0.007  | 3.66E-01 | 18775 | -0.361 | -0.607 | -0.115 | 0.126 | -2.878 | -0.021 | 4.00E-03 | 18750 |
| 47 | Calcarine_L          | 0.271  | -1.493 | 2.034 | 0.900 | 0.301  | 0.002  | 7.63E-01 | 18775 | -0.268 | -2.563 | 2.028  | 1.171 | -0.229 | -0.002 | 8.19E-01 | 18750 |
| 48 | Calcarine_R          | 0.532  | -0.941 | 2.006 | 0.752 | 0.708  | 0.005  | 4.79E-01 | 18775 | 0.087  | -1.832 | 2.005  | 0.979 | 0.088  | 0.001  | 9.30E-01 | 18750 |
| 49 | Cuneus_L             | 0.007  | -1.100 | 1.114 | 0.565 | 0.012  | 0.000  | 9.91E-01 | 18775 | 0.549  | -0.892 | 1.991  | 0.736 | 0.747  | 0.005  | 4.55E-01 | 18750 |
| 50 | Cuneus_R             | 0.301  | -0.546 | 1.147 | 0.432 | 0.696  | 0.005  | 4.86E-01 | 18775 | -1.190 | -2.292 | -0.087 | 0.563 | -2.115 | -0.015 | 3.45E-02 | 18750 |
| 51 | Lingual_L            | 0.483  | -0.578 | 1.544 | 0.541 | 0.893  | 0.007  | 3.72E-01 | 18775 | -0.661 | -2.045 | 0.722  | 0.706 | -0.937 | -0.007 | 3.49E-01 | 18750 |
| 52 | Lingual_R            | 0.537  | -0.575 | 1.649 | 0.567 | 0.947  | 0.007  | 3.44E-01 | 18775 | -1.064 | -2.511 | 0.384  | 0.738 | -1.441 | -0.011 | 1.50E-01 | 18750 |
| 53 | Occipital_Sup_L      | 1.238  | 0.509  | 1.967 | 0.372 | 3.328  | 0.024  | 8.76E-04 | 18775 | -0.746 | -1.697 | 0.205  | 0.485 | -1.538 | -0.011 | 1.24E-01 | 18750 |
| 54 | Occipital_Sup_R      | 0.886  | 0.096  | 1.677 | 0.403 | 2.199  | 0.016  | 2.79E-02 | 18775 | -1.468 | -2.497 | -0.438 | 0.525 | -2.794 | -0.020 | 5.20E-03 | 18750 |
| 55 | Occipital_Mid_L      | 0.284  | -1.425 | 1.994 | 0.872 | 0.326  | 0.002  | 7.44E-01 | 18775 | -3.767 | -5.991 | -1.543 | 1.135 | -3.320 | -0.024 | 9.01E-04 | 18750 |
| 56 | Occipital_Mid_R      | 0.798  | -0.392 | 1.987 | 0.607 | 1.315  | 0.010  | 1.89E-01 | 18775 | -1.958 | -3.507 | -0.410 | 0.790 | -2.478 | -0.018 | 1.32E-02 | 18750 |
| 57 | Occipital_Inf_L      | -0.095 | -0.662 | 0.472 | 0.289 | -0.329 | -0.002 | 7.42E-01 | 18775 | -1.252 | -1.990 | -0.514 | 0.377 | -3.324 | -0.024 | 8.89E-04 | 18750 |
| 58 | Occipital_Inf_R      | 0.370  | -0.286 | 1.025 | 0.334 | 1.105  | 0.008  | 2.69E-01 | 18775 | -1.452 | -2.306 | -0.599 | 0.436 | -3.334 | -0.024 | 8.56E-04 | 18750 |
| 59 | Fusiform_L           | 0.617  | -0.625 | 1.858 | 0.633 | 0.973  | 0.007  | 3.30E-01 | 18775 | -1.745 | -3.363 | -0.127 | 0.825 | -2.114 | -0.015 | 3.45E-02 | 18750 |
| 60 | Fusiform_R           | 0.033  | -1.332 | 1.397 | 0.696 | 0.047  | 0.000  | 9.63E-01 | 18775 | -1.120 | -2.897 | 0.657  | 0.907 | -1.235 | -0.009 | 2.17E-01 | 18750 |
| 61 | Postcentral_L        | 1.303  | -0.566 | 3.171 | 0.953 | 1.366  | 0.010  | 1.72E-01 | 18775 | -0.896 | -3.330 | 1.537  | 1.242 | -0.722 | -0.005 | 4.70E-01 | 18750 |
| 62 | Postcentral_R        | 0.815  | -1.100 | 2.730 | 0.977 | 0.834  | 0.006  | 4.04E-01 | 18775 | -0.096 | -2.589 | 2.398  | 1.272 | -0.075 | -0.001 | 9.40E-01 | 18750 |
| 63 | Parietal_Sup_L       | -0.844 | -1.921 | 0.232 | 0.549 | -1.537 | -0.011 | 1.24E-01 | 18775 | -0.175 | -1.578 | 1.227  | 0.715 | -0.245 | -0.002 | 8.06E-01 | 18750 |
| 64 | Parietal_Sup_R       | -0.937 | -1.893 | 0.018 | 0.487 | -1.923 | -0.014 | 5.45E-02 | 18775 | 0.123  | -1.121 | 1.367  | 0.635 | 0.194  | 0.001  | 8.47E-01 | 18750 |
| 65 | Parietal_Inf_L       | 0.438  | -0.971 | 1.847 | 0.719 | 0.609  | 0.004  | 5.42E-01 | 18775 | -0.619 | -2.455 | 1.217  | 0.937 | -0.661 | -0.005 | 5.08E-01 | 18750 |
| 66 | Parietal_Inf_R       | 0.167  | -0.747 | 1.081 | 0.466 | 0.359  | 0.003  | 7.20E-01 | 18775 | -0.750 | -1.940 | 0.440  | 0.607 | -1.235 | -0.009 | 2.17E-01 | 18750 |
| 67 | SupraMarginal_L      | 0.366  | -0.461 | 1.192 | 0.422 | 0.868  | 0.006  | 3.86E-01 | 18775 | -0.669 | -1.745 | 0.406  | 0.549 | -1.220 | -0.009 | 2.23E-01 | 18750 |
| 68 | SupraMarginal_R      | 0.439  | -0.731 | 1.608 | 0.597 | 0.735  | 0.005  | 4.62E-01 | 18775 | -1.470 | -2.993 | 0.053  | 0.777 | -1.892 | -0.014 | 5.85E-02 | 18750 |
| 69 | Angular_L            | -0.178 | -0.990 | 0.634 | 0.414 | -0.430 | -0.003 | 6.67E-01 | 18775 | 0.228  | -0.829 | 1.286  | 0.540 | 0.423  | 0.003  | 6.72E-01 | 18750 |
| 70 | Angular_R            | -0.269 | -1.357 | 0.820 | 0.555 | -0.484 | -0.004 | 6.28E-01 | 18775 | -0.483 | -1.899 | 0.934  | 0.723 | -0.668 | -0.005 | 5.04E-01 | 18750 |
| 71 | Precuneus_L          | -0.730 | -2.709 | 1.250 | 1.010 | -0.722 | -0.005 | 4.70E-01 | 18775 | -1.073 | -3.650 | 1.505  | 1.315 | -0.816 | -0.006 | 4.15E-01 | 18750 |
| 72 | Precuneus_R          | -0.301 | -2.064 | 1.462 | 0.899 | -0.335 | -0.002 | 7.38E-01 | 18775 | -2.743 | -5.038 | -0.448 | 1.171 | -2.342 | -0.017 | 1.92E-02 | 18750 |
| 73 | Paracentral_Lobule_L | -0.493 | -1.399 | 0.412 | 0.462 | -1.068 | -0.008 | 2.85E-01 | 18775 | 0.542  | -0.638 | 1.721  | 0.602 | 0.900  | 0.007  | 3.68E-01 | 18750 |
| 74 | Paracentral_Lobule_R | -0.366 | -1.015 | 0.283 | 0.331 | -1.105 | -0.008 | 2.69E-01 | 18775 | 0.194  | -0.651 | 1.040  | 0.431 | 0.451  | 0.003  | 6.52E-01 | 18750 |

|     |                     |        |        |        |       |        |        |          |       |        |        |        |       |        |        |          |       |
|-----|---------------------|--------|--------|--------|-------|--------|--------|----------|-------|--------|--------|--------|-------|--------|--------|----------|-------|
| 75  | Caudate_L           | 0.091  | -0.633 | 0.815  | 0.370 | 0.246  | 0.002  | 8.05E-01 | 18775 | 0.629  | -0.314 | 1.571  | 0.481 | 1.308  | 0.010  | 1.91E-01 | 18750 |
| 76  | Caudate_R           | -0.316 | -1.136 | 0.504  | 0.418 | -0.755 | -0.006 | 4.51E-01 | 18775 | 0.800  | -0.267 | 1.868  | 0.545 | 1.469  | 0.011  | 1.42E-01 | 18750 |
| 77  | Putamen_L           | -1.112 | -2.210 | -0.014 | 0.560 | -1.985 | -0.014 | 4.72E-02 | 18775 | -1.173 | -2.603 | 0.258  | 0.730 | -1.607 | -0.012 | 1.08E-01 | 18750 |
| 78  | Putamen_R           | -1.208 | -2.326 | -0.089 | 0.571 | -2.116 | -0.015 | 3.44E-02 | 18775 | -0.871 | -2.328 | 0.586  | 0.744 | -1.171 | -0.009 | 2.42E-01 | 18750 |
| 79  | Pallidum_L          | -0.130 | -0.228 | -0.033 | 0.050 | -2.615 | -0.019 | 8.92E-03 | 18775 | -0.063 | -0.190 | 0.064  | 0.065 | -0.970 | -0.007 | 3.32E-01 | 18750 |
| 80  | Pallidum_R          | -0.157 | -0.264 | -0.050 | 0.055 | -2.874 | -0.021 | 4.05E-03 | 18775 | -0.074 | -0.214 | 0.065  | 0.071 | -1.046 | -0.008 | 2.96E-01 | 18750 |
| 83  | Heschl_L            | 0.118  | -0.080 | 0.316  | 0.101 | 1.166  | 0.009  | 2.44E-01 | 18775 | -0.286 | -0.544 | -0.029 | 0.132 | -2.177 | -0.016 | 2.95E-02 | 18750 |
| 84  | Heschl_R            | 0.388  | 0.166  | 0.609  | 0.113 | 3.436  | 0.025  | 5.91E-04 | 18775 | -0.435 | -0.723 | -0.147 | 0.147 | -2.963 | -0.022 | 3.05E-03 | 18750 |
| 85  | Temporal_Sup_L      | 1.408  | -0.021 | 2.837  | 0.729 | 1.931  | 0.014  | 5.35E-02 | 18775 | -2.660 | -4.521 | -0.799 | 0.949 | -2.801 | -0.020 | 5.09E-03 | 18750 |
| 86  | Temporal_Sup_R      | 1.214  | -0.368 | 2.796  | 0.807 | 1.504  | 0.011  | 1.33E-01 | 18775 | -4.677 | -6.736 | -2.618 | 1.050 | -4.453 | -0.033 | 8.52E-06 | 18750 |
| 87  | Temporal_Pole_Sup_L | 0.244  | -0.434 | 0.921  | 0.346 | 0.705  | 0.005  | 4.81E-01 | 18775 | -1.355 | -2.236 | -0.474 | 0.449 | -3.015 | -0.022 | 2.58E-03 | 18750 |
| 88  | Temporal_Pole_Sup_R | 0.685  | -0.028 | 1.398  | 0.364 | 1.883  | 0.014  | 5.97E-02 | 18775 | -1.500 | -2.427 | -0.573 | 0.473 | -3.171 | -0.023 | 1.52E-03 | 18750 |
| 89  | Temporal_Mid_L      | 0.718  | -1.666 | 3.101  | 1.216 | 0.590  | 0.004  | 5.55E-01 | 18775 | -5.447 | -8.549 | -2.344 | 1.583 | -3.441 | -0.025 | 5.81E-04 | 18750 |
| 90  | Temporal_Mid_R      | 0.282  | -1.834 | 2.397  | 1.079 | 0.261  | 0.002  | 7.94E-01 | 18775 | -4.736 | -7.491 | -1.982 | 1.405 | -3.370 | -0.025 | 7.52E-04 | 18750 |
| 91  | Temporal_Pole_Mid_L | 0.558  | -0.012 | 1.127  | 0.290 | 1.920  | 0.014  | 5.48E-02 | 18775 | -0.451 | -1.191 | 0.290  | 0.378 | -1.194 | -0.009 | 2.33E-01 | 18750 |
| 92  | Temporal_Pole_Mid_R | 1.011  | 0.320  | 1.702  | 0.353 | 2.869  | 0.021  | 4.13E-03 | 18775 | -1.306 | -2.206 | -0.407 | 0.459 | -2.846 | -0.021 | 4.43E-03 | 18750 |
| 93  | Temporal_Inf_L      | -0.572 | -2.210 | 1.066  | 0.836 | -0.684 | -0.005 | 4.94E-01 | 18775 | -3.034 | -5.166 | -0.901 | 1.088 | -2.788 | -0.020 | 5.31E-03 | 18750 |
| 94  | Temporal_Inf_R      | -0.157 | -1.942 | 1.629  | 0.911 | -0.172 | -0.001 | 8.63E-01 | 18775 | -2.699 | -5.025 | -0.373 | 1.187 | -2.275 | -0.017 | 2.29E-02 | 18750 |
| 95  | Cerebellum_Crus1_L  | -0.508 | -2.455 | 1.438  | 0.993 | -0.512 | -0.004 | 6.09E-01 | 18775 | 0.233  | -2.302 | 2.768  | 1.293 | 0.180  | 0.001  | 8.57E-01 | 18750 |
| 96  | Cerebellum_Crus1_R  | -0.428 | -2.412 | 1.556  | 1.012 | -0.423 | -0.003 | 6.72E-01 | 18775 | -0.808 | -3.393 | 1.776  | 1.318 | -0.613 | -0.004 | 5.40E-01 | 18750 |
| 97  | Cerebellum_Crus2_L  | 0.667  | -0.875 | 2.209  | 0.787 | 0.848  | 0.006  | 3.97E-01 | 18775 | -1.152 | -3.162 | 0.857  | 1.025 | -1.124 | -0.008 | 2.61E-01 | 18750 |
| 98  | Cerebellum_Crus2_R  | 0.173  | -1.253 | 1.599  | 0.727 | 0.238  | 0.002  | 8.12E-01 | 18775 | -2.060 | -3.918 | -0.203 | 0.948 | -2.174 | -0.016 | 2.97E-02 | 18750 |
| 99  | Cerebellum_3_L      | -0.114 | -0.217 | -0.010 | 0.053 | -2.159 | -0.016 | 3.09E-02 | 18775 | 0.000  | -0.135 | 0.135  | 0.069 | 0.000  | 0.000  | 1.00E+00 | 18750 |
| 100 | Cerebellum_3_R      | -0.064 | -0.203 | 0.076  | 0.071 | -0.895 | -0.007 | 3.71E-01 | 18775 | -0.029 | -0.211 | 0.153  | 0.093 | -0.307 | -0.002 | 7.59E-01 | 18750 |
| 101 | Cerebellum_4_5_L    | 0.339  | -0.498 | 1.177  | 0.427 | 0.795  | 0.006  | 4.27E-01 | 18775 | -0.102 | -1.192 | 0.989  | 0.556 | -0.183 | -0.001 | 8.55E-01 | 18750 |
| 102 | Cerebellum_4_5_R    | 0.211  | -0.471 | 0.893  | 0.348 | 0.606  | 0.004  | 5.45E-01 | 18775 | 0.201  | -0.688 | 1.090  | 0.453 | 0.443  | 0.003  | 6.58E-01 | 18750 |
| 103 | Cerebellum_6_L      | 0.385  | -1.063 | 1.834  | 0.739 | 0.522  | 0.004  | 6.02E-01 | 18775 | -0.369 | -2.255 | 1.517  | 0.962 | -0.383 | -0.003 | 7.02E-01 | 18750 |
| 104 | Cerebellum_6_R      | 0.094  | -1.431 | 1.620  | 0.778 | 0.121  | 0.001  | 9.03E-01 | 18775 | -0.556 | -2.543 | 1.431  | 1.014 | -0.548 | -0.004 | 5.83E-01 | 18750 |
| 105 | Cerebellum_7b_L     | 0.025  | -0.447 | 0.497  | 0.241 | 0.104  | 0.001  | 9.17E-01 | 18775 | -0.576 | -1.190 | 0.039  | 0.313 | -1.837 | -0.013 | 6.63E-02 | 18750 |
| 106 | Cerebellum_7b_R     | 0.192  | -0.275 | 0.659  | 0.238 | 0.805  | 0.006  | 4.21E-01 | 18775 | -0.546 | -1.155 | 0.062  | 0.311 | -1.759 | -0.013 | 7.86E-02 | 18750 |
| 107 | Cerebellum_8_L      | -0.167 | -1.665 | 1.331  | 0.764 | -0.218 | -0.002 | 8.28E-01 | 18775 | -1.709 | -3.661 | 0.242  | 0.996 | -1.717 | -0.013 | 8.61E-02 | 18750 |
| 108 | Cerebellum_8_R      | -0.641 | -2.590 | 1.308  | 0.994 | -0.645 | -0.005 | 5.19E-01 | 18775 | -3.083 | -5.623 | -0.544 | 1.296 | -2.380 | -0.017 | 1.73E-02 | 18750 |
| 109 | Cerebellum_9_L      | -0.172 | -1.019 | 0.675  | 0.432 | -0.398 | -0.003 | 6.91E-01 | 18775 | -0.841 | -1.944 | 0.262  | 0.563 | -1.494 | -0.011 | 1.35E-01 | 18750 |
| 110 | Cerebellum_9_R      | -0.341 | -1.174 | 0.491  | 0.425 | -0.804 | -0.006 | 4.21E-01 | 18775 | -1.087 | -2.172 | -0.002 | 0.553 | -1.964 | -0.014 | 4.95E-02 | 18750 |
| 111 | Cerebellum_10_L     | -0.005 | -0.065 | 0.055  | 0.031 | -0.152 | -0.001 | 8.79E-01 | 18775 | 0.009  | -0.070 | 0.087  | 0.040 | 0.217  | 0.002  | 8.28E-01 | 18750 |
| 112 | Cerebellum_10_R     | -0.059 | -0.122 | 0.003  | 0.032 | -1.860 | -0.014 | 6.29E-02 | 18775 | 0.051  | -0.031 | 0.132  | 0.041 | 1.223  | 0.009  | 2.21E-01 | 18750 |
| 113 | Vermis_1_2          | -0.062 | -0.101 | -0.023 | 0.020 | -3.102 | -0.023 | 1.93E-03 | 18775 | -0.010 | -0.061 | 0.041  | 0.026 | -0.384 | -0.003 | 7.01E-01 | 18750 |
| 114 | Vermis_3            | -0.196 | -0.351 | -0.041 | 0.079 | -2.475 | -0.018 | 1.33E-02 | 18775 | -0.076 | -0.278 | 0.126  | 0.103 | -0.739 | -0.005 | 4.60E-01 | 18750 |
| 115 | Vermis_4_5          | -0.195 | -0.651 | 0.261  | 0.233 | -0.838 | -0.006 | 4.02E-01 | 18775 | 0.107  | -0.487 | 0.701  | 0.303 | 0.352  | 0.003  | 7.24E-01 | 18750 |
| 116 | Vermis_6            | -0.175 | -0.429 | 0.079  | 0.130 | -1.348 | -0.010 | 1.78E-01 | 18775 | 0.106  | -0.225 | 0.437  | 0.169 | 0.628  | 0.005  | 5.30E-01 | 18750 |
| 117 | Vermis_7            | -0.119 | -0.263 | 0.025  | 0.073 | -1.623 | -0.012 | 1.05E-01 | 18775 | 0.053  | -0.134 | 0.241  | 0.096 | 0.560  | 0.004  | 5.75E-01 | 18750 |
| 118 | Vermis_8            | -0.236 | -0.472 | 0.000  | 0.120 | -1.960 | -0.014 | 5.00E-02 | 18775 | -0.118 | -0.426 | 0.189  | 0.157 | -0.754 | -0.006 | 4.51E-01 | 18750 |
| 119 | Vermis_9            | -0.051 | -0.242 | 0.141  | 0.098 | -0.519 | -0.004 | 6.04E-01 | 18775 | -0.135 | -0.385 | 0.114  | 0.127 | -1.062 | -0.008 | 2.88E-01 | 18750 |
| 120 | Vermis_10           | -0.016 | -0.069 | 0.037  | 0.027 | -0.585 | -0.004 | 5.59E-01 | 18775 | -0.015 | -0.085 | 0.054  | 0.035 | -0.432 | -0.003 | 6.66E-01 | 18750 |
| 121 | Thal_AV_L           | 0.014  | -0.007 | 0.036  | 0.011 | 1.317  | 0.010  | 1.88E-01 | 18775 | -0.021 | -0.049 | 0.007  | 0.014 | -1.487 | -0.011 | 1.37E-01 | 18750 |
| 122 | Thal_AV_R           | 0.021  | -0.009 | 0.052  | 0.016 | 1.354  | 0.010  | 1.76E-01 | 18775 | -0.030 | -0.070 | 0.010  | 0.020 | -1.475 | -0.011 | 1.40E-01 | 18750 |
| 123 | Thal_LP_L           | 0.019  | -0.004 | 0.043  | 0.012 | 1.589  | 0.012  | 1.12E-01 | 18775 | -0.038 | -0.069 | -0.008 | 0.016 | -2.442 | -0.018 | 1.46E-02 | 18750 |
| 124 | Thal_LP_R           | 0.050  | 0.019  | 0.081  | 0.016 | 3.166  | 0.023  | 1.55E-03 | 18775 | -0.068 | -0.108 | -0.028 | 0.020 | -3.327 | -0.024 | 8.81E-04 | 18750 |
| 125 | Thal_VA_L           | -0.013 | -0.038 | 0.013  | 0.013 | -0.985 | -0.007 | 3.24E-01 | 18775 | 0.020  | -0.013 | 0.053  | 0.017 | 1.176  | 0.009  | 2.40E-01 | 18750 |



|     |            |        |        |        |       |        |        |          |       |        |        |        |       |        |        |          |       |
|-----|------------|--------|--------|--------|-------|--------|--------|----------|-------|--------|--------|--------|-------|--------|--------|----------|-------|
| 126 | Thal_VA_R  | -0.022 | -0.053 | 0.009  | 0.016 | -1.372 | -0.010 | 1.70E-01 | 18775 | -0.005 | -0.045 | 0.035  | 0.021 | -0.243 | -0.002 | 8.08E-01 | 18750 |
| 127 | Thal_VL_L  | 0.070  | -0.002 | 0.142  | 0.037 | 1.902  | 0.014  | 5.72E-02 | 18775 | -0.180 | -0.274 | -0.087 | 0.048 | -3.781 | -0.028 | 1.57E-04 | 18750 |
| 128 | Thal_VL_R  | 0.118  | 0.022  | 0.213  | 0.049 | 2.416  | 0.018  | 1.57E-02 | 18775 | -0.275 | -0.399 | -0.151 | 0.063 | -4.348 | -0.032 | 1.38E-05 | 18750 |
| 129 | Thal_VPL_L | 0.157  | 0.072  | 0.243  | 0.044 | 3.605  | 0.026  | 3.13E-04 | 18775 | -0.251 | -0.363 | -0.140 | 0.057 | -4.427 | -0.032 | 9.62E-06 | 18750 |
| 130 | Thal_VPL_R | 0.194  | 0.104  | 0.283  | 0.046 | 4.223  | 0.031  | 2.43E-05 | 18775 | -0.252 | -0.369 | -0.135 | 0.060 | -4.225 | -0.031 | 2.41E-05 | 18750 |
| 131 | Thal_IL_L  | 0.067  | 0.030  | 0.104  | 0.019 | 3.548  | 0.026  | 3.89E-04 | 18775 | -0.100 | -0.148 | -0.051 | 0.025 | -4.053 | -0.030 | 5.08E-05 | 18750 |
| 132 | Thal_IL_R  | 0.090  | 0.048  | 0.132  | 0.021 | 4.191  | 0.031  | 2.80E-05 | 18775 | -0.123 | -0.178 | -0.069 | 0.028 | -4.424 | -0.032 | 9.73E-06 | 18750 |
| 133 | Thal_Re_L  | 0.000  | 0.000  | 0.000  | 0.000 | -2.609 | -0.019 | 9.08E-03 | 18775 | 0.000  | 0.000  | 0.000  | 0.000 | -0.083 | -0.001 | 9.34E-01 | 18750 |
| 134 | Thal_Re_R  | 0.000  | -0.002 | 0.001  | 0.001 | -0.697 | -0.005 | 4.86E-01 | 18775 | -0.002 | -0.004 | -0.001 | 0.001 | -2.571 | -0.019 | 1.01E-02 | 18750 |
| 135 | Thal_MDm_L | 0.534  | 0.260  | 0.808  | 0.140 | 3.817  | 0.028  | 1.36E-04 | 18775 | -0.761 | -1.118 | -0.404 | 0.182 | -4.180 | -0.031 | 2.93E-05 | 18750 |
| 136 | Thal_MDm_R | 0.692  | 0.374  | 1.011  | 0.162 | 4.262  | 0.031  | 2.03E-05 | 18775 | -0.867 | -1.281 | -0.452 | 0.211 | -4.098 | -0.030 | 4.18E-05 | 18750 |
| 137 | Thal_MDL_L | 0.095  | 0.048  | 0.143  | 0.024 | 3.946  | 0.029  | 7.96E-05 | 18775 | -0.148 | -0.210 | -0.086 | 0.032 | -4.702 | -0.034 | 2.60E-06 | 18750 |
| 138 | Thal_MDL_R | 0.123  | 0.069  | 0.177  | 0.028 | 4.486  | 0.033  | 7.30E-06 | 18775 | -0.167 | -0.237 | -0.097 | 0.036 | -4.669 | -0.034 | 3.05E-06 | 18750 |
| 139 | Thal_LGN_L | -0.003 | -0.011 | 0.004  | 0.004 | -0.952 | -0.007 | 3.41E-01 | 18775 | -0.011 | -0.020 | -0.002 | 0.005 | -2.307 | -0.017 | 2.11E-02 | 18750 |
| 140 | Thal_LGN_R | -0.008 | -0.024 | 0.007  | 0.008 | -1.058 | -0.008 | 2.90E-01 | 18775 | -0.048 | -0.067 | -0.028 | 0.010 | -4.665 | -0.034 | 3.11E-06 | 18750 |
| 141 | Thal_MGN_L | 0.006  | -0.007 | 0.019  | 0.007 | 0.952  | 0.007  | 3.41E-01 | 18775 | -0.037 | -0.053 | -0.020 | 0.009 | -4.284 | -0.031 | 1.84E-05 | 18750 |
| 142 | Thal_MGN_R | 0.010  | -0.004 | 0.024  | 0.007 | 1.419  | 0.010  | 1.56E-01 | 18775 | -0.044 | -0.062 | -0.026 | 0.009 | -4.750 | -0.035 | 2.05E-06 | 18750 |
| 143 | Thal_PuA_L | 0.011  | -0.004 | 0.027  | 0.008 | 1.469  | 0.011  | 1.42E-01 | 18775 | -0.043 | -0.063 | -0.023 | 0.010 | -4.255 | -0.031 | 2.10E-05 | 18750 |
| 144 | Thal_PuA_R | 0.039  | 0.007  | 0.070  | 0.016 | 2.408  | 0.018  | 1.60E-02 | 18775 | -0.101 | -0.142 | -0.060 | 0.021 | -4.810 | -0.035 | 1.52E-06 | 18750 |
| 145 | Thal_PuM_L | 0.452  | 0.150  | 0.754  | 0.154 | 2.936  | 0.021  | 3.33E-03 | 18775 | -0.863 | -1.256 | -0.470 | 0.200 | -4.304 | -0.031 | 1.69E-05 | 18750 |
| 146 | Thal_PuM_R | 0.724  | 0.348  | 1.100  | 0.192 | 3.772  | 0.028  | 1.62E-04 | 18775 | -1.055 | -1.545 | -0.566 | 0.250 | -4.224 | -0.031 | 2.41E-05 | 18750 |
| 147 | Thal_PuL_L | 0.104  | 0.049  | 0.159  | 0.028 | 3.702  | 0.027  | 2.15E-04 | 18775 | -0.154 | -0.226 | -0.083 | 0.037 | -4.218 | -0.031 | 2.48E-05 | 18750 |
| 148 | Thal_PuL_R | 0.190  | 0.103  | 0.278  | 0.045 | 4.264  | 0.031  | 2.02E-05 | 18775 | -0.236 | -0.350 | -0.122 | 0.058 | -4.062 | -0.030 | 4.88E-05 | 18750 |
| 149 | Thal_PuL_L | 0.011  | -0.004 | 0.026  | 0.008 | 1.404  | 0.010  | 1.60E-01 | 18775 | -0.019 | -0.039 | 0.000  | 0.010 | -1.930 | -0.014 | 5.36E-02 | 18750 |
| 150 | Thal_PuL_R | 0.018  | -0.002 | 0.037  | 0.010 | 1.742  | 0.013  | 8.15E-02 | 18775 | -0.030 | -0.055 | -0.004 | 0.013 | -2.250 | -0.016 | 2.45E-02 | 18750 |
| 151 | ACC_sub_L  | 0.036  | -0.136 | 0.209  | 0.088 | 0.412  | 0.003  | 6.80E-01 | 18775 | -0.211 | -0.435 | 0.014  | 0.115 | -1.835 | -0.013 | 6.65E-02 | 18750 |
| 152 | ACC_sub_R  | 0.052  | -0.110 | 0.213  | 0.082 | 0.626  | 0.005  | 5.31E-01 | 18775 | -0.205 | -0.415 | 0.005  | 0.107 | -1.910 | -0.014 | 5.61E-02 | 18750 |
| 153 | ACC_pre_L  | -0.142 | -0.585 | 0.301  | 0.226 | -0.630 | -0.005 | 5.29E-01 | 18775 | -0.646 | -1.222 | -0.070 | 0.294 | -2.197 | -0.016 | 2.80E-02 | 18750 |
| 154 | ACC_pre_R  | -0.282 | -0.709 | 0.144  | 0.217 | -1.298 | -0.009 | 1.94E-01 | 18775 | -0.713 | -1.268 | -0.158 | 0.283 | -2.519 | -0.018 | 1.18E-02 | 18750 |
| 155 | ACC_sup_L  | 0.182  | -0.299 | 0.663  | 0.245 | 0.743  | 0.005  | 4.58E-01 | 18775 | -0.943 | -1.569 | -0.316 | 0.319 | -2.951 | -0.022 | 3.17E-03 | 18750 |
| 156 | ACC_sup_R  | 0.018  | -0.480 | 0.516  | 0.254 | 0.070  | 0.001  | 9.44E-01 | 18775 | -0.708 | -1.356 | -0.059 | 0.331 | -2.138 | -0.016 | 3.25E-02 | 18750 |
| 157 | N_Acc_L    | -0.128 | -0.272 | 0.017  | 0.074 | -1.727 | -0.013 | 8.43E-02 | 18775 | -0.089 | -0.277 | 0.100  | 0.096 | -0.920 | -0.007 | 3.57E-01 | 18750 |
| 158 | N_Acc_R    | -0.160 | -0.285 | -0.034 | 0.064 | -2.499 | -0.018 | 1.25E-02 | 18775 | -0.105 | -0.268 | 0.058  | 0.083 | -1.258 | -0.009 | 2.08E-01 | 18750 |
| 159 | VTA_L      | 0.008  | 0.003  | 0.013  | 0.003 | 2.930  | 0.021  | 3.39E-03 | 18775 | -0.009 | -0.016 | -0.002 | 0.003 | -2.694 | -0.020 | 7.07E-03 | 18750 |
| 160 | VTA_R      | 0.009  | 0.004  | 0.013  | 0.002 | 3.712  | 0.027  | 2.06E-04 | 18775 | -0.007 | -0.013 | -0.001 | 0.003 | -2.425 | -0.018 | 1.53E-02 | 18750 |
| 161 | SN_pc_L    | 0.015  | 0.006  | 0.023  | 0.004 | 3.483  | 0.025  | 4.96E-04 | 18775 | -0.014 | -0.025 | -0.004 | 0.005 | -2.668 | -0.019 | 7.64E-03 | 18750 |
| 162 | SN_pc_R    | 0.020  | 0.009  | 0.031  | 0.005 | 3.658  | 0.027  | 2.55E-04 | 18775 | -0.017 | -0.031 | -0.003 | 0.007 | -2.376 | -0.017 | 1.75E-02 | 18750 |
| 163 | SN_pr_L    | 0.010  | -0.002 | 0.021  | 0.006 | 1.689  | 0.012  | 9.12E-02 | 18775 | -0.019 | -0.034 | -0.005 | 0.007 | -2.630 | -0.019 | 8.56E-03 | 18750 |
| 164 | SN_pr_R    | 0.017  | 0.004  | 0.029  | 0.006 | 2.625  | 0.019  | 8.68E-03 | 18775 | -0.019 | -0.035 | -0.003 | 0.008 | -2.314 | -0.017 | 2.07E-02 | 18750 |
| 165 | Red_N_L    | 0.001  | -0.013 | 0.014  | 0.007 | 0.085  | 0.001  | 9.33E-01 | 18775 | -0.029 | -0.047 | -0.012 | 0.009 | -3.234 | -0.024 | 1.22E-03 | 18750 |
| 166 | Red_N_R    | 0.002  | -0.013 | 0.017  | 0.008 | 0.292  | 0.002  | 7.71E-01 | 18775 | -0.022 | -0.041 | -0.002 | 0.010 | -2.180 | -0.016 | 2.93E-02 | 18750 |
| 167 | LC_L       | -0.006 | -0.011 | -0.001 | 0.003 | -2.265 | -0.017 | 2.35E-02 | 18775 | -0.004 | -0.011 | 0.002  | 0.003 | -1.274 | -0.009 | 2.03E-01 | 18750 |
| 168 | LC_R       | -0.006 | -0.011 | 0.000  | 0.003 | -2.068 | -0.015 | 3.87E-02 | 18775 | -0.006 | -0.013 | 0.002  | 0.004 | -1.491 | -0.011 | 1.36E-01 | 18750 |
| 169 | Raphe_D    | -0.005 | -0.025 | 0.015  | 0.010 | -0.512 | -0.004 | 6.08E-01 | 18775 | -0.046 | -0.072 | -0.020 | 0.013 | -3.474 | -0.025 | 5.15E-04 | 18750 |
| 170 | Raphe_M    | -0.003 | -0.009 | 0.003  | 0.003 | -0.959 | -0.007 | 3.37E-01 | 18775 | -0.007 | -0.015 | 0.001  | 0.004 | -1.677 | -0.012 | 9.36E-02 | 18750 |

**Cooked vegetable intake**

**Processed meat intake**

| Number | AAL 3 region | beta     | 95%CI l  | 95%CI h | se     | t      | r      | p        | df.e  | beta     | 95%CI l  | 95%CI h  | se     | t      | r      | p        | df.e  |
|--------|--------------|----------|----------|---------|--------|--------|--------|----------|-------|----------|----------|----------|--------|--------|--------|----------|-------|
| 0      | Total brain  | -153.752 | -253.273 | -54.231 | 50.774 | -3.028 | -0.022 | 2.46E-03 | 18661 | -319.575 | -450.441 | -188.710 | 66.765 | -4.787 | -0.035 | 1.71E-06 | 18865 |
| 1      | Precentral_L | -2.700   | -6.202   | 0.801   | 1.786  | -1.511 | -0.011 | 1.31E-01 | 18661 | -5.118   | -9.722   | -0.515   | 2.349  | -2.179 | -0.016 | 2.93E-02 | 18865 |

|    |                      |        |        |        |       |        |        |          |       |        |         |        |       |        |        |          |       |
|----|----------------------|--------|--------|--------|-------|--------|--------|----------|-------|--------|---------|--------|-------|--------|--------|----------|-------|
| 2  | Precentral_R         | -1.535 | -4.741 | 1.672  | 1.636 | -0.938 | -0.007 | 3.48E-01 | 18661 | -4.252 | -8.470  | -0.034 | 2.152 | -1.976 | -0.014 | 4.82E-02 | 18865 |
| 3  | Frontal_Sup_2_L      | -4.404 | -8.101 | -0.708 | 1.886 | -2.335 | -0.017 | 1.95E-02 | 18661 | -3.736 | -8.598  | 1.125  | 2.480 | -1.507 | -0.011 | 1.32E-01 | 18865 |
| 4  | Frontal_Sup_2_R      | -3.610 | -7.685 | 0.464  | 2.079 | -1.737 | -0.013 | 8.24E-02 | 18661 | -6.481 | -11.839 | -1.123 | 2.734 | -2.371 | -0.017 | 1.78E-02 | 18865 |
| 5  | Frontal_Mid_2_L      | -2.407 | -6.289 | 1.475  | 1.980 | -1.215 | -0.009 | 2.24E-01 | 18661 | -1.255 | -6.361  | 3.851  | 2.605 | -0.482 | -0.004 | 6.30E-01 | 18865 |
| 6  | Frontal_Mid_2_R      | -3.511 | -7.900 | 0.878  | 2.239 | -1.568 | -0.011 | 1.17E-01 | 18661 | -6.255 | -12.033 | -0.477 | 2.948 | -2.122 | -0.015 | 3.38E-02 | 18865 |
| 7  | Frontal_Inf_Oper_L   | -0.522 | -1.668 | 0.624  | 0.585 | -0.893 | -0.007 | 3.72E-01 | 18661 | -1.703 | -3.212  | -0.195 | 0.770 | -2.213 | -0.016 | 2.69E-02 | 18865 |
| 8  | Frontal_Inf_Oper_R   | -1.182 | -2.620 | 0.256  | 0.734 | -1.611 | -0.012 | 1.07E-01 | 18661 | -1.787 | -3.679  | 0.105  | 0.965 | -1.851 | -0.013 | 6.41E-02 | 18865 |
| 9  | Frontal_Inf_Tri_L    | -2.319 | -4.750 | 0.113  | 1.241 | -1.869 | -0.014 | 6.16E-02 | 18661 | -3.220 | -6.422  | -0.017 | 1.634 | -1.971 | -0.014 | 4.88E-02 | 18865 |
| 10 | Frontal_Inf_Tri_R    | -0.378 | -2.288 | 1.533  | 0.975 | -0.388 | -0.003 | 6.98E-01 | 18661 | -3.003 | -5.519  | -0.488 | 1.283 | -2.340 | -0.017 | 1.93E-02 | 18865 |
| 11 | Frontal_Inf_Orb_2_L  | -1.114 | -1.842 | -0.386 | 0.371 | -3.000 | -0.022 | 2.71E-03 | 18661 | -0.384 | -1.342  | 0.574  | 0.489 | -0.785 | -0.006 | 4.32E-01 | 18865 |
| 12 | Frontal_Inf_Orb_2_R  | -0.922 | -1.682 | -0.161 | 0.388 | -2.374 | -0.017 | 1.76E-02 | 18661 | -0.878 | -1.879  | 0.123  | 0.511 | -1.719 | -0.013 | 8.56E-02 | 18865 |
| 13 | Rolandic_Oper_L      | -1.863 | -2.963 | -0.762 | 0.562 | -3.317 | -0.024 | 9.10E-04 | 18661 | -1.402 | -2.851  | 0.046  | 0.739 | -1.897 | -0.014 | 5.78E-02 | 18865 |
| 14 | Rolandic_Oper_R      | -2.665 | -4.240 | -1.090 | 0.803 | -3.317 | -0.024 | 9.10E-04 | 18661 | -2.385 | -4.458  | -0.312 | 1.058 | -2.256 | -0.016 | 2.41E-02 | 18865 |
| 15 | Supp_Motor_Area_L    | -1.961 | -4.579 | 0.656  | 1.336 | -1.469 | -0.011 | 1.42E-01 | 18661 | -3.457 | -6.901  | -0.012 | 1.757 | -1.967 | -0.014 | 4.92E-02 | 18865 |
| 16 | Supp_Motor_Area_R    | -1.820 | -4.713 | 1.074  | 1.476 | -1.233 | -0.009 | 2.18E-01 | 18661 | -3.688 | -7.494  | 0.118  | 1.942 | -1.900 | -0.014 | 5.75E-02 | 18865 |
| 17 | Olfactory_L          | -0.539 | -0.928 | -0.149 | 0.199 | -2.711 | -0.020 | 6.71E-03 | 18661 | -0.195 | -0.707  | 0.317  | 0.261 | -0.745 | -0.005 | 4.56E-01 | 18865 |
| 18 | Olfactory_R          | -0.457 | -0.847 | -0.066 | 0.199 | -2.291 | -0.017 | 2.20E-02 | 18661 | -0.174 | -0.687  | 0.340  | 0.262 | -0.664 | -0.005 | 5.07E-01 | 18865 |
| 19 | Frontal_Sup_Medial_L | -2.405 | -4.859 | 0.050  | 1.252 | -1.920 | -0.014 | 5.48E-02 | 18661 | -4.668 | -7.896  | -1.439 | 1.647 | -2.834 | -0.021 | 4.60E-03 | 18865 |
| 20 | Frontal_Sup_Medial_R | -2.380 | -4.167 | -0.593 | 0.912 | -2.611 | -0.019 | 9.04E-03 | 18661 | -3.279 | -5.628  | -0.930 | 1.198 | -2.736 | -0.020 | 6.22E-03 | 18865 |
| 21 | Frontal_Med_Orb_L    | -1.455 | -2.373 | -0.538 | 0.468 | -3.109 | -0.023 | 1.88E-03 | 18661 | -0.893 | -2.099  | 0.313  | 0.615 | -1.451 | -0.011 | 1.47E-01 | 18865 |
| 22 | Frontal_Med_Orb_R    | -1.615 | -2.743 | -0.487 | 0.575 | -2.807 | -0.021 | 5.01E-03 | 18661 | -1.365 | -2.847  | 0.117  | 0.756 | -1.805 | -0.013 | 7.10E-02 | 18865 |
| 23 | Rectus_L             | -1.573 | -2.523 | -0.624 | 0.484 | -3.249 | -0.024 | 1.16E-03 | 18661 | -1.391 | -2.639  | -0.143 | 0.637 | -2.184 | -0.016 | 2.90E-02 | 18865 |
| 24 | Rectus_R             | -1.297 | -2.175 | -0.419 | 0.448 | -2.896 | -0.021 | 3.79E-03 | 18661 | -0.971 | -2.126  | 0.184  | 0.589 | -1.648 | -0.012 | 9.94E-02 | 18865 |
| 25 | OFCmed_L             | -1.115 | -1.665 | -0.565 | 0.281 | -3.971 | -0.029 | 7.19E-05 | 18661 | -0.965 | -1.688  | -0.241 | 0.369 | -2.613 | -0.019 | 8.98E-03 | 18865 |
| 26 | OFCmed_R             | -0.706 | -1.347 | -0.065 | 0.327 | -2.158 | -0.016 | 3.09E-02 | 18661 | -0.612 | -1.455  | 0.231  | 0.430 | -1.422 | -0.010 | 1.55E-01 | 18865 |
| 27 | OFCant_L             | -1.033 | -1.669 | -0.396 | 0.325 | -3.181 | -0.023 | 1.47E-03 | 18661 | -0.668 | -1.505  | 0.169  | 0.427 | -1.565 | -0.011 | 1.18E-01 | 18865 |
| 28 | OFCant_R             | -0.955 | -1.796 | -0.114 | 0.429 | -2.227 | -0.016 | 2.60E-02 | 18661 | -0.890 | -1.995  | 0.214  | 0.564 | -1.580 | -0.012 | 1.14E-01 | 18865 |
| 29 | OFCpost_L            | -1.413 | -2.209 | -0.616 | 0.406 | -3.476 | -0.025 | 5.09E-04 | 18661 | -0.320 | -1.368  | 0.727  | 0.534 | -0.600 | -0.004 | 5.49E-01 | 18865 |
| 30 | OFCpost_R            | -1.332 | -2.069 | -0.596 | 0.376 | -3.546 | -0.026 | 3.93E-04 | 18661 | -0.910 | -1.878  | 0.058  | 0.494 | -1.843 | -0.013 | 6.53E-02 | 18865 |
| 31 | OFClat_L             | -0.291 | -0.560 | -0.023 | 0.137 | -2.126 | -0.016 | 3.35E-02 | 18661 | -0.376 | -0.729  | -0.022 | 0.180 | -2.082 | -0.015 | 3.73E-02 | 18865 |
| 32 | OFClat_R             | -0.409 | -0.636 | -0.182 | 0.116 | -3.532 | -0.026 | 4.13E-04 | 18661 | -0.330 | -0.628  | -0.031 | 0.152 | -2.165 | -0.016 | 3.04E-02 | 18865 |
| 33 | Insula_L             | -3.156 | -5.618 | -0.694 | 1.256 | -2.513 | -0.018 | 1.20E-02 | 18661 | -2.830 | -6.070  | 0.409  | 1.653 | -1.713 | -0.012 | 8.68E-02 | 18865 |
| 34 | Insula_R             | -3.595 | -5.996 | -1.195 | 1.225 | -2.936 | -0.021 | 3.33E-03 | 18661 | -3.176 | -6.333  | -0.019 | 1.611 | -1.972 | -0.014 | 4.86E-02 | 18865 |
| 37 | Cingulate_Mid_L      | -2.952 | -5.035 | -0.868 | 1.063 | -2.777 | -0.020 | 5.49E-03 | 18661 | -7.593 | -10.333 | -4.854 | 1.398 | -5.433 | -0.040 | 5.62E-08 | 18865 |
| 38 | Cingulate_Mid_R      | -2.251 | -4.470 | -0.032 | 1.132 | -1.988 | -0.015 | 4.68E-02 | 18661 | -7.364 | -10.284 | -4.444 | 1.490 | -4.943 | -0.036 | 7.77E-07 | 18865 |
| 39 | Cingulate_Post_L     | -0.776 | -1.411 | -0.140 | 0.324 | -2.393 | -0.018 | 1.67E-02 | 18661 | -1.577 | -2.412  | -0.741 | 0.426 | -3.697 | -0.027 | 2.19E-04 | 18865 |
| 40 | Cingulate_Post_R     | -0.435 | -0.788 | -0.082 | 0.180 | -2.418 | -0.018 | 1.56E-02 | 18661 | -0.670 | -1.134  | -0.206 | 0.237 | -2.831 | -0.021 | 4.64E-03 | 18865 |
| 41 | Hippocampus_L        | -0.457 | -1.485 | 0.571  | 0.524 | -0.871 | -0.006 | 3.84E-01 | 18661 | -0.702 | -2.054  | 0.651  | 0.690 | -1.016 | -0.007 | 3.09E-01 | 18865 |
| 42 | Hippocampus_R        | -0.479 | -1.546 | 0.588  | 0.544 | -0.880 | -0.006 | 3.79E-01 | 18661 | -0.618 | -2.021  | 0.786  | 0.716 | -0.863 | -0.006 | 3.88E-01 | 18865 |
| 43 | ParaHippocampal_L    | -0.421 | -1.335 | 0.492  | 0.466 | -0.904 | -0.007 | 3.66E-01 | 18661 | -1.877 | -3.079  | -0.675 | 0.613 | -3.062 | -0.022 | 2.20E-03 | 18865 |
| 44 | ParaHippocampal_R    | -0.195 | -1.350 | 0.959  | 0.589 | -0.331 | -0.002 | 7.40E-01 | 18661 | -2.353 | -3.870  | -0.835 | 0.774 | -3.039 | -0.022 | 2.37E-03 | 18865 |
| 45 | Amygdala_L           | -0.395 | -0.750 | -0.040 | 0.181 | -2.182 | -0.016 | 2.91E-02 | 18661 | 0.031  | -0.436  | 0.498  | 0.238 | 0.130  | 0.001  | 8.97E-01 | 18865 |
| 46 | Amygdala_R           | -0.368 | -0.732 | -0.005 | 0.185 | -1.987 | -0.015 | 4.70E-02 | 18661 | -0.280 | -0.758  | 0.198  | 0.244 | -1.149 | -0.008 | 2.51E-01 | 18865 |
| 47 | Calcarine_L          | -1.349 | -4.735 | 2.038  | 1.728 | -0.781 | -0.006 | 4.35E-01 | 18661 | -4.546 | -9.001  | -0.091 | 2.273 | -2.000 | -0.015 | 4.55E-02 | 18865 |
| 48 | Calcarine_R          | -1.656 | -4.486 | 1.174  | 1.444 | -1.147 | -0.008 | 2.51E-01 | 18661 | -3.055 | -6.778  | 0.668  | 1.899 | -1.608 | -0.012 | 1.08E-01 | 18865 |
| 49 | Cuneus_L             | -1.171 | -3.298 | 0.956  | 1.085 | -1.079 | -0.008 | 2.80E-01 | 18661 | -4.169 | -6.965  | -1.372 | 1.427 | -2.921 | -0.021 | 3.49E-03 | 18865 |
| 50 | Cuneus_R             | -1.138 | -2.765 | 0.489  | 0.830 | -1.371 | -0.010 | 1.71E-01 | 18661 | -3.535 | -5.673  | -1.396 | 1.091 | -3.240 | -0.024 | 1.20E-03 | 18865 |
| 51 | Lingual_L            | -1.680 | -3.719 | 0.360  | 1.041 | -1.614 | -0.012 | 1.07E-01 | 18661 | -4.272 | -6.953  | -1.591 | 1.368 | -3.123 | -0.023 | 1.79E-03 | 18865 |
| 52 | Lingual_R            | -2.461 | -4.598 | -0.324 | 1.090 | -2.257 | -0.017 | 2.40E-02 | 18661 | -4.078 | -6.887  | -1.270 | 1.433 | -2.846 | -0.021 | 4.43E-03 | 18865 |

|     |                      |        |         |        |       |        |        |          |       |         |         |        |       |        |        |          |       |
|-----|----------------------|--------|---------|--------|-------|--------|--------|----------|-------|---------|---------|--------|-------|--------|--------|----------|-------|
| 53  | Occipital_Sup_L      | -1.087 | -2.489  | 0.315  | 0.715 | -1.520 | -0.011 | 1.29E-01 | 18661 | -4.631  | -6.473  | -2.789 | 0.940 | -4.927 | -0.036 | 8.43E-07 | 18865 |
| 54  | Occipital_Sup_R      | -1.225 | -2.746  | 0.295  | 0.776 | -1.580 | -0.012 | 1.14E-01 | 18661 | -2.541  | -4.538  | -0.543 | 1.019 | -2.493 | -0.018 | 1.27E-02 | 18865 |
| 55  | Occipital_Mid_L      | -2.551 | -5.833  | 0.730  | 1.674 | -1.524 | -0.011 | 1.28E-01 | 18661 | -5.382  | -9.701  | -1.063 | 2.204 | -2.443 | -0.018 | 1.46E-02 | 18865 |
| 56  | Occipital_Mid_R      | -0.842 | -3.129  | 1.444  | 1.166 | -0.722 | -0.005 | 4.70E-01 | 18661 | -1.040  | -4.047  | 1.967  | 1.534 | -0.678 | -0.005 | 4.98E-01 | 18865 |
| 57  | Occipital_Inf_L      | -1.295 | -2.384  | -0.206 | 0.556 | -2.330 | -0.017 | 1.98E-02 | 18661 | -0.378  | -1.811  | 1.054  | 0.731 | -0.518 | -0.004 | 6.05E-01 | 18865 |
| 58  | Occipital_Inf_R      | -1.783 | -3.044  | -0.523 | 0.643 | -2.773 | -0.020 | 5.57E-03 | 18661 | 1.773   | 0.117   | 3.429  | 0.845 | 2.098  | 0.015  | 3.59E-02 | 18865 |
| 59  | Fusiform_L           | -0.172 | -2.559  | 2.215  | 1.218 | -0.142 | -0.001 | 8.87E-01 | 18661 | -5.953  | -9.091  | -2.816 | 1.601 | -3.720 | -0.027 | 2.00E-04 | 18865 |
| 60  | Fusiform_R           | -1.848 | -4.470  | 0.774  | 1.338 | -1.381 | -0.010 | 1.67E-01 | 18661 | -5.680  | -9.127  | -2.232 | 1.759 | -3.229 | -0.024 | 1.24E-03 | 18865 |
| 61  | Postcentral_L        | -3.303 | -6.893  | 0.288  | 1.832 | -1.803 | -0.013 | 7.14E-02 | 18661 | -9.732  | -14.453 | -5.010 | 2.409 | -4.040 | -0.029 | 5.37E-05 | 18865 |
| 62  | Postcentral_R        | -3.795 | -7.474  | -0.117 | 1.877 | -2.022 | -0.015 | 4.32E-02 | 18661 | -9.485  | -14.320 | -4.650 | 2.467 | -3.845 | -0.028 | 1.21E-04 | 18865 |
| 63  | Parietal_Sup_L       | -1.715 | -3.782  | 0.352  | 1.054 | -1.627 | -0.012 | 1.04E-01 | 18661 | -4.104  | -6.824  | -1.384 | 1.388 | -2.957 | -0.022 | 3.11E-03 | 18865 |
| 64  | Parietal_Sup_R       | -0.587 | -2.421  | 1.247  | 0.936 | -0.627 | -0.005 | 5.31E-01 | 18661 | -3.090  | -5.502  | -0.678 | 1.231 | -2.511 | -0.018 | 1.20E-02 | 18865 |
| 65  | Parietal_Inf_L       | -1.848 | -4.557  | 0.860  | 1.382 | -1.338 | -0.010 | 1.81E-01 | 18661 | -9.842  | -13.400 | -6.283 | 1.816 | -5.421 | -0.039 | 6.00E-08 | 18865 |
| 66  | Parietal_Inf_R       | -0.340 | -2.094  | 1.414  | 0.895 | -0.380 | -0.003 | 7.04E-01 | 18661 | -3.445  | -5.753  | -1.137 | 1.178 | -2.925 | -0.021 | 3.44E-03 | 18865 |
| 67  | SupraMarginal_L      | -1.897 | -3.483  | -0.310 | 0.810 | -2.343 | -0.017 | 1.91E-02 | 18661 | -3.611  | -5.698  | -1.524 | 1.065 | -3.392 | -0.025 | 6.96E-04 | 18865 |
| 68  | SupraMarginal_R      | -2.467 | -4.715  | -0.220 | 1.147 | -2.152 | -0.016 | 3.14E-02 | 18661 | -4.494  | -7.449  | -1.539 | 1.508 | -2.981 | -0.022 | 2.87E-03 | 18865 |
| 69  | Angular_L            | -0.772 | -2.332  | 0.788  | 0.796 | -0.970 | -0.007 | 3.32E-01 | 18661 | -3.676  | -5.727  | -1.626 | 1.046 | -3.514 | -0.026 | 4.42E-04 | 18865 |
| 70  | Angular_R            | -0.719 | -2.809  | 1.371  | 1.066 | -0.674 | -0.005 | 5.00E-01 | 18661 | -2.675  | -5.423  | 0.073  | 1.402 | -1.908 | -0.014 | 5.64E-02 | 18865 |
| 71  | Precuneus_L          | -1.131 | -4.933  | 2.671  | 1.940 | -0.583 | -0.004 | 5.60E-01 | 18661 | -14.675 | -19.672 | -9.679 | 2.549 | -5.757 | -0.042 | 8.69E-09 | 18865 |
| 72  | Precuneus_R          | -1.824 | -5.211  | 1.562  | 1.728 | -1.056 | -0.008 | 2.91E-01 | 18661 | -9.365  | -13.816 | -4.914 | 2.271 | -4.124 | -0.030 | 3.74E-05 | 18865 |
| 73  | Paracentral_Lobule_L | -0.494 | -2.232  | 1.245  | 0.887 | -0.557 | -0.004 | 5.78E-01 | 18661 | -2.833  | -5.121  | -0.544 | 1.168 | -2.426 | -0.018 | 1.53E-02 | 18865 |
| 74  | Paracentral_Lobule_R | -0.898 | -2.143  | 0.347  | 0.635 | -1.413 | -0.010 | 1.58E-01 | 18661 | -2.092  | -3.731  | -0.453 | 0.836 | -2.501 | -0.018 | 1.24E-02 | 18865 |
| 75  | Caudate_L            | -0.240 | -1.629  | 1.148  | 0.708 | -0.339 | -0.002 | 7.34E-01 | 18661 | -1.232  | -3.060  | 0.595  | 0.932 | -1.322 | -0.010 | 1.86E-01 | 18865 |
| 76  | Caudate_R            | -0.285 | -1.859  | 1.288  | 0.803 | -0.355 | -0.003 | 7.22E-01 | 18661 | -0.642  | -2.712  | 1.429  | 1.056 | -0.607 | -0.004 | 5.44E-01 | 18865 |
| 77  | Putamen_L            | -0.393 | -2.503  | 1.717  | 1.077 | -0.365 | -0.003 | 7.15E-01 | 18661 | -2.112  | -4.888  | 0.663  | 1.416 | -1.492 | -0.011 | 1.36E-01 | 18865 |
| 78  | Putamen_R            | -0.960 | -3.110  | 1.189  | 1.097 | -0.876 | -0.006 | 3.81E-01 | 18661 | -2.469  | -5.296  | 0.358  | 1.442 | -1.712 | -0.012 | 8.70E-02 | 18865 |
| 79  | Pallidum_L           | -0.006 | -0.194  | 0.181  | 0.096 | -0.067 | 0.000  | 9.47E-01 | 18661 | -0.145  | -0.392  | 0.101  | 0.126 | -1.155 | -0.008 | 2.48E-01 | 18865 |
| 80  | Pallidum_R           | -0.074 | -0.280  | 0.132  | 0.105 | -0.705 | -0.005 | 4.81E-01 | 18661 | -0.210  | -0.481  | 0.061  | 0.138 | -1.521 | -0.011 | 1.28E-01 | 18865 |
| 83  | Heschl_L             | -0.420 | -0.801  | -0.040 | 0.194 | -2.168 | -0.016 | 3.02E-02 | 18661 | -0.686  | -1.186  | -0.185 | 0.255 | -2.686 | -0.020 | 7.24E-03 | 18865 |
| 84  | Heschl_R             | -0.633 | -1.058  | -0.208 | 0.217 | -2.918 | -0.021 | 3.53E-03 | 18661 | -0.632  | -1.191  | -0.073 | 0.285 | -2.217 | -0.016 | 2.66E-02 | 18865 |
| 85  | Temporal_Sup_L       | -4.936 | -7.680  | -2.192 | 1.400 | -3.525 | -0.026 | 4.24E-04 | 18661 | -4.515  | -8.124  | -0.905 | 1.841 | -2.452 | -0.018 | 1.42E-02 | 18865 |
| 86  | Temporal_Sup_R       | -4.756 | -7.794  | -1.718 | 1.550 | -3.068 | -0.022 | 2.16E-03 | 18661 | -4.548  | -8.544  | -0.551 | 2.039 | -2.231 | -0.016 | 2.57E-02 | 18865 |
| 87  | Temporal_Pole_Sup_L  | -1.003 | -2.305  | 0.298  | 0.664 | -1.511 | -0.011 | 1.31E-01 | 18661 | -0.663  | -2.374  | 1.048  | 0.873 | -0.759 | -0.006 | 4.48E-01 | 18865 |
| 88  | Temporal_Pole_Sup_R  | -0.552 | -1.921  | 0.817  | 0.699 | -0.790 | -0.006 | 4.29E-01 | 18661 | -1.320  | -3.121  | 0.480  | 0.919 | -1.437 | -0.010 | 1.51E-01 | 18865 |
| 89  | Temporal_Mid_L       | -6.018 | -10.598 | -1.438 | 2.336 | -2.576 | -0.019 | 1.00E-02 | 18661 | -8.039  | -14.062 | -2.017 | 3.072 | -2.617 | -0.019 | 8.89E-03 | 18865 |
| 90  | Temporal_Mid_R       | -3.380 | -7.446  | 0.686  | 2.074 | -1.629 | -0.012 | 1.03E-01 | 18661 | -5.772  | -11.118 | -0.425 | 2.728 | -2.116 | -0.015 | 3.44E-02 | 18865 |
| 91  | Temporal_Pole_Mid_L  | 0.076  | -1.019  | 1.170  | 0.558 | 0.136  | 0.001  | 8.92E-01 | 18661 | -1.365  | -2.803  | 0.073  | 0.734 | -1.860 | -0.014 | 6.28E-02 | 18865 |
| 92  | Temporal_Pole_Mid_R  | -0.923 | -2.251  | 0.405  | 0.678 | -1.363 | -0.010 | 1.73E-01 | 18661 | -0.798  | -2.544  | 0.949  | 0.891 | -0.895 | -0.007 | 3.71E-01 | 18865 |
| 93  | Temporal_Inf_L       | -4.402 | -7.551  | -1.254 | 1.606 | -2.741 | -0.020 | 6.14E-03 | 18661 | -2.730  | -6.870  | 1.410  | 2.112 | -1.293 | -0.009 | 1.96E-01 | 18865 |
| 94  | Temporal_Inf_R       | -5.271 | -8.703  | -1.840 | 1.750 | -3.011 | -0.022 | 2.60E-03 | 18661 | -1.449  | -5.962  | 3.064  | 2.302 | -0.629 | -0.005 | 5.29E-01 | 18865 |
| 95  | Cerebellum_Crus1_L   | -2.161 | -5.901  | 1.580  | 1.908 | -1.132 | -0.008 | 2.58E-01 | 18661 | -5.847  | -10.762 | -0.933 | 2.507 | -2.332 | -0.017 | 1.97E-02 | 18865 |
| 96  | Cerebellum_Crus1_R   | 0.428  | -3.384  | 4.239  | 1.945 | 0.220  | 0.002  | 8.26E-01 | 18661 | -4.199  | -9.211  | 0.813  | 2.557 | -1.642 | -0.012 | 1.01E-01 | 18865 |
| 97  | Cerebellum_Crus2_L   | -2.334 | -5.298  | 0.631  | 1.512 | -1.543 | -0.011 | 1.23E-01 | 18661 | -8.275  | -12.171 | -4.378 | 1.988 | -4.162 | -0.030 | 3.16E-05 | 18865 |
| 98  | Cerebellum_Crus2_R   | -1.070 | -3.808  | 1.668  | 1.397 | -0.766 | -0.006 | 4.44E-01 | 18661 | -4.665  | -8.269  | -1.062 | 1.838 | -2.538 | -0.018 | 1.12E-02 | 18865 |
| 99  | Cerebellum_3_L       | 0.265  | 0.066   | 0.464  | 0.101 | 2.609  | 0.019  | 9.08E-03 | 18661 | -0.125  | -0.386  | 0.137  | 0.133 | -0.936 | -0.007 | 3.49E-01 | 18865 |
| 100 | Cerebellum_3_R       | 0.255  | -0.013  | 0.523  | 0.137 | 1.862  | 0.014  | 6.26E-02 | 18661 | -0.214  | -0.567  | 0.139  | 0.180 | -1.189 | -0.009 | 2.34E-01 | 18865 |
| 101 | Cerebellum_4_5_L     | 1.827  | 0.219   | 3.435  | 0.820 | 2.227  | 0.016  | 2.59E-02 | 18661 | -1.287  | -3.403  | 0.829  | 1.079 | -1.192 | -0.009 | 2.33E-01 | 18865 |
| 102 | Cerebellum_4_5_R     | 1.003  | -0.308  | 2.313  | 0.669 | 1.500  | 0.011  | 1.34E-01 | 18661 | -1.419  | -3.142  | 0.305  | 0.879 | -1.613 | -0.012 | 1.07E-01 | 18865 |
| 103 | Cerebellum_6_L       | 1.862  | -0.921  | 4.644  | 1.420 | 1.311  | 0.010  | 1.90E-01 | 18661 | -4.510  | -8.170  | -0.851 | 1.867 | -2.416 | -0.018 | 1.57E-02 | 18865 |

|     |                 |        |        |        |       |        |        |          |       |        |         |        |       |        |        |          |       |
|-----|-----------------|--------|--------|--------|-------|--------|--------|----------|-------|--------|---------|--------|-------|--------|--------|----------|-------|
| 104 | Cerebellum_6_R  | 1.855  | -1.075 | 4.785  | 1.495 | 1.241  | 0.009  | 2.15E-01 | 18661 | -3.666 | -7.521  | 0.188  | 1.966 | -1.864 | -0.014 | 6.23E-02 | 18865 |
| 105 | Cerebellum_7b_L | -0.643 | -1.549 | 0.262  | 0.462 | -1.393 | -0.010 | 1.64E-01 | 18661 | -1.680 | -2.871  | -0.488 | 0.608 | -2.763 | -0.020 | 5.74E-03 | 18865 |
| 106 | Cerebellum_7b_R | -0.597 | -1.494 | 0.300  | 0.458 | -1.305 | -0.010 | 1.92E-01 | 18661 | -1.548 | -2.729  | -0.367 | 0.602 | -2.570 | -0.019 | 1.02E-02 | 18865 |
| 107 | Cerebellum_8_L  | -2.105 | -4.981 | 0.770  | 1.467 | -1.435 | -0.011 | 1.51E-01 | 18661 | -1.370 | -5.156  | 2.417  | 1.932 | -0.709 | -0.005 | 4.78E-01 | 18865 |
| 108 | Cerebellum_8_R  | -2.355 | -6.098 | 1.389  | 1.910 | -1.233 | -0.009 | 2.18E-01 | 18661 | -5.425 | -10.352 | -0.498 | 2.513 | -2.158 | -0.016 | 3.09E-02 | 18865 |
| 109 | Cerebellum_9_L  | -0.427 | -2.054 | 1.200  | 0.830 | -0.515 | -0.004 | 6.07E-01 | 18661 | 1.841  | -0.299  | 3.981  | 1.092 | 1.686  | 0.012  | 9.18E-02 | 18865 |
| 110 | Cerebellum_9_R  | -0.547 | -2.146 | 1.053  | 0.816 | -0.670 | -0.005 | 5.03E-01 | 18661 | 1.779  | -0.324  | 3.882  | 1.073 | 1.658  | 0.012  | 9.74E-02 | 18865 |
| 111 | Cerebellum_10_L | 0.050  | -0.065 | 0.166  | 0.059 | 0.851  | 0.006  | 3.95E-01 | 18661 | 0.244  | 0.092   | 0.395  | 0.077 | 3.150  | 0.023  | 1.64E-03 | 18865 |
| 112 | Cerebellum_10_R | 0.057  | -0.063 | 0.178  | 0.061 | 0.939  | 0.007  | 3.48E-01 | 18661 | 0.121  | -0.037  | 0.279  | 0.081 | 1.499  | 0.011  | 1.34E-01 | 18865 |
| 113 | Vermis_1_2      | 0.097  | 0.022  | 0.172  | 0.038 | 2.530  | 0.019  | 1.14E-02 | 18661 | -0.035 | -0.134  | 0.063  | 0.050 | -0.702 | -0.005 | 4.83E-01 | 18865 |
| 114 | Vermis_3        | 0.202  | -0.096 | 0.500  | 0.152 | 1.327  | 0.010  | 1.84E-01 | 18661 | -0.355 | -0.747  | 0.037  | 0.200 | -1.776 | -0.013 | 7.58E-02 | 18865 |
| 115 | Vermis_4_5      | -0.211 | -1.087 | 0.664  | 0.447 | -0.473 | -0.003 | 6.36E-01 | 18661 | -0.605 | -1.757  | 0.547  | 0.588 | -1.029 | -0.007 | 3.04E-01 | 18865 |
| 116 | Vermis_6        | 0.256  | -0.231 | 0.744  | 0.249 | 1.031  | 0.008  | 3.02E-01 | 18661 | -0.349 | -0.990  | 0.293  | 0.327 | -1.065 | -0.008 | 2.87E-01 | 18865 |
| 117 | Vermis_7        | 0.184  | -0.091 | 0.460  | 0.141 | 1.311  | 0.010  | 1.90E-01 | 18661 | -0.013 | -0.376  | 0.350  | 0.185 | -0.071 | -0.001 | 9.43E-01 | 18865 |
| 118 | Vermis_8        | 0.438  | -0.015 | 0.891  | 0.231 | 1.894  | 0.014  | 5.82E-02 | 18661 | 0.107  | -0.489  | 0.704  | 0.304 | 0.353  | 0.003  | 7.24E-01 | 18865 |
| 119 | Vermis_9        | 0.141  | -0.227 | 0.508  | 0.188 | 0.750  | 0.005  | 4.54E-01 | 18661 | 0.234  | -0.250  | 0.717  | 0.247 | 0.947  | 0.007  | 3.44E-01 | 18865 |
| 120 | Vermis_10       | 0.082  | -0.021 | 0.184  | 0.052 | 1.562  | 0.011  | 1.18E-01 | 18661 | 0.191  | 0.056   | 0.325  | 0.069 | 2.774  | 0.020  | 5.54E-03 | 18865 |
| 121 | Thal_AV_L       | -0.022 | -0.063 | 0.019  | 0.021 | -1.040 | -0.008 | 2.98E-01 | 18661 | -0.075 | -0.129  | -0.021 | 0.028 | -2.720 | -0.020 | 6.53E-02 | 18865 |
| 122 | Thal_AV_R       | 0.009  | -0.050 | 0.068  | 0.030 | 0.299  | 0.002  | 7.65E-01 | 18661 | -0.096 | -0.173  | -0.019 | 0.039 | -2.432 | -0.018 | 1.50E-02 | 18865 |
| 123 | Thal_LP_L       | -0.019 | -0.065 | 0.026  | 0.023 | -0.840 | -0.006 | 4.01E-01 | 18661 | -0.097 | -0.156  | -0.037 | 0.030 | -3.165 | -0.023 | 1.55E-03 | 18865 |
| 124 | Thal_LP_R       | 0.005  | -0.055 | 0.064  | 0.030 | 0.154  | 0.001  | 8.78E-01 | 18661 | -0.105 | -0.183  | -0.027 | 0.040 | -2.651 | -0.019 | 8.04E-03 | 18865 |
| 125 | Thal_VA_L       | -0.018 | -0.067 | 0.030  | 0.025 | -0.734 | -0.005 | 4.63E-01 | 18661 | -0.045 | -0.109  | 0.019  | 0.033 | -1.390 | -0.010 | 1.64E-01 | 18865 |
| 126 | Thal_VA_R       | -0.007 | -0.067 | 0.052  | 0.030 | -0.237 | -0.002 | 8.13E-01 | 18661 | -0.043 | -0.121  | 0.035  | 0.040 | -1.079 | -0.008 | 2.81E-01 | 18865 |
| 127 | Thal_VL_L       | 0.016  | -0.122 | 0.154  | 0.070 | 0.230  | 0.002  | 8.18E-01 | 18661 | -0.154 | -0.335  | 0.028  | 0.093 | -1.659 | -0.012 | 9.71E-02 | 18865 |
| 128 | Thal_VL_R       | 0.044  | -0.139 | 0.227  | 0.093 | 0.469  | 0.003  | 6.39E-01 | 18661 | -0.282 | -0.523  | -0.042 | 0.123 | -2.298 | -0.017 | 2.16E-02 | 18865 |
| 129 | Thal_VPL_L      | 0.131  | -0.033 | 0.296  | 0.084 | 1.567  | 0.011  | 1.17E-01 | 18661 | -0.066 | -0.282  | 0.150  | 0.110 | -0.596 | -0.004 | 5.51E-01 | 18865 |
| 130 | Thal_VPL_R      | 0.071  | -0.102 | 0.243  | 0.088 | 0.800  | 0.006  | 4.24E-01 | 18661 | -0.135 | -0.362  | 0.092  | 0.116 | -1.165 | -0.008 | 2.44E-01 | 18865 |
| 131 | Thal_IL_L       | -0.040 | -0.112 | 0.031  | 0.036 | -1.115 | -0.008 | 2.65E-01 | 18661 | -0.102 | -0.195  | -0.008 | 0.048 | -2.134 | -0.016 | 3.28E-02 | 18865 |
| 132 | Thal_IL_R       | -0.039 | -0.120 | 0.041  | 0.041 | -0.958 | -0.007 | 3.38E-01 | 18661 | -0.130 | -0.236  | -0.024 | 0.054 | -2.410 | -0.018 | 1.60E-02 | 18865 |
| 133 | Thal_Re_L       | 0.000  | -0.001 | 0.000  | 0.000 | -1.258 | -0.009 | 2.08E-01 | 18661 | 0.000  | 0.000   | 0.000  | 0.000 | -0.235 | -0.002 | 8.14E-01 | 18865 |
| 134 | Thal_Re_R       | 0.000  | -0.003 | 0.002  | 0.001 | -0.333 | -0.002 | 7.39E-01 | 18661 | -0.002 | -0.005  | 0.001  | 0.002 | -1.267 | -0.009 | 2.05E-01 | 18865 |
| 135 | Thal_MDm_L      | -0.339 | -0.865 | 0.188  | 0.269 | -1.260 | -0.009 | 2.08E-01 | 18661 | -0.936 | -1.628  | -0.243 | 0.353 | -2.649 | -0.019 | 8.07E-03 | 18865 |
| 136 | Thal_MDm_R      | -0.212 | -0.824 | 0.400  | 0.312 | -0.680 | -0.005 | 4.97E-01 | 18661 | -1.005 | -1.810  | -0.201 | 0.410 | -2.449 | -0.018 | 1.43E-02 | 18865 |
| 137 | Thal_MD_L       | -0.072 | -0.163 | 0.019  | 0.046 | -1.551 | -0.011 | 1.21E-01 | 18661 | -0.185 | -0.305  | -0.065 | 0.061 | -3.024 | -0.022 | 2.49E-03 | 18865 |
| 138 | Thal_MD_R       | -0.030 | -0.133 | 0.074  | 0.053 | -0.565 | -0.004 | 5.72E-01 | 18661 | -0.196 | -0.332  | -0.060 | 0.069 | -2.820 | -0.021 | 4.81E-03 | 18865 |
| 139 | Thal_LGN_L      | -0.001 | -0.015 | 0.013  | 0.007 | -0.164 | -0.001 | 8.70E-01 | 18661 | -0.025 | -0.043  | -0.007 | 0.009 | -2.696 | -0.020 | 7.02E-03 | 18865 |
| 140 | Thal_LGN_R      | -0.008 | -0.037 | 0.022  | 0.015 | -0.503 | -0.004 | 6.15E-01 | 18661 | -0.062 | -0.101  | -0.023 | 0.020 | -3.132 | -0.023 | 1.74E-03 | 18865 |
| 141 | Thal_MGN_L      | -0.017 | -0.042 | 0.007  | 0.013 | -1.379 | -0.010 | 1.68E-01 | 18661 | -0.038 | -0.071  | -0.006 | 0.017 | -2.299 | -0.017 | 2.15E-02 | 18865 |
| 142 | Thal_MGN_R      | -0.020 | -0.047 | 0.007  | 0.014 | -1.442 | -0.011 | 1.49E-01 | 18661 | -0.063 | -0.098  | -0.027 | 0.018 | -3.473 | -0.025 | 5.16E-04 | 18865 |
| 143 | Thal_PuA_L      | -0.016 | -0.046 | 0.013  | 0.015 | -1.107 | -0.008 | 2.68E-01 | 18661 | -0.065 | -0.104  | -0.027 | 0.020 | -3.345 | -0.024 | 8.26E-04 | 18865 |
| 144 | Thal_PuA_R      | -0.039 | -0.100 | 0.022  | 0.031 | -1.262 | -0.009 | 2.07E-01 | 18661 | -0.143 | -0.222  | -0.063 | 0.041 | -3.504 | -0.026 | 4.59E-04 | 18865 |
| 145 | Thal_PuM_L      | -0.298 | -0.878 | 0.282  | 0.296 | -1.007 | -0.007 | 3.14E-01 | 18661 | -1.301 | -2.063  | -0.539 | 0.389 | -3.346 | -0.024 | 8.21E-04 | 18865 |
| 146 | Thal_PuM_R      | -0.311 | -1.033 | 0.411  | 0.368 | -0.844 | -0.006 | 3.99E-01 | 18661 | -1.469 | -2.419  | -0.520 | 0.485 | -3.033 | -0.022 | 2.43E-03 | 18865 |
| 147 | Thal_PuL_L      | -0.050 | -0.156 | 0.056  | 0.054 | -0.930 | -0.007 | 3.52E-01 | 18661 | -0.216 | -0.355  | -0.077 | 0.071 | -3.051 | -0.022 | 2.29E-03 | 18865 |
| 148 | Thal_PuL_R      | -0.069 | -0.237 | 0.100  | 0.086 | -0.799 | -0.006 | 4.25E-01 | 18661 | -0.306 | -0.527  | -0.085 | 0.113 | -2.710 | -0.020 | 6.74E-03 | 18865 |
| 149 | Thal_PuL_L      | 0.024  | -0.005 | 0.052  | 0.015 | 1.604  | 0.012  | 1.09E-01 | 18661 | -0.023 | -0.061  | 0.014  | 0.019 | -1.212 | -0.009 | 2.26E-01 | 18865 |
| 150 | Thal_PuL_R      | 0.018  | -0.021 | 0.056  | 0.019 | 0.902  | 0.007  | 3.67E-01 | 18661 | -0.036 | -0.086  | 0.014  | 0.026 | -1.418 | -0.010 | 1.56E-01 | 18865 |
| 151 | ACC_sub_L       | -0.524 | -0.856 | -0.193 | 0.169 | -3.099 | -0.023 | 1.95E-03 | 18661 | -0.055 | -0.491  | 0.381  | 0.223 | -0.247 | -0.002 | 8.05E-01 | 18865 |
| 152 | ACC_sub_R       | -0.537 | -0.847 | -0.228 | 0.158 | -3.401 | -0.025 | 6.72E-04 | 18661 | 0.015  | -0.393  | 0.422  | 0.208 | 0.070  | 0.001  | 9.44E-01 | 18865 |

|     |           |        |        |        |       |        |        |          |       |        |        |        |       |        |        |          |       |
|-----|-----------|--------|--------|--------|-------|--------|--------|----------|-------|--------|--------|--------|-------|--------|--------|----------|-------|
| 153 | ACC_pre_L | -0.976 | -1.827 | -0.125 | 0.434 | -2.249 | -0.016 | 2.45E-02 | 18661 | -0.965 | -2.084 | 0.153  | 0.571 | -1.692 | -0.012 | 9.07E-02 | 18865 |
| 154 | ACC_pre_R | -0.955 | -1.774 | -0.136 | 0.418 | -2.287 | -0.017 | 2.22E-02 | 18661 | -0.979 | -2.056 | 0.099  | 0.550 | -1.780 | -0.013 | 7.50E-02 | 18865 |
| 155 | ACC_sup_L | -1.331 | -2.256 | -0.407 | 0.472 | -2.823 | -0.021 | 4.76E-03 | 18661 | -1.422 | -2.638 | -0.206 | 0.620 | -2.293 | -0.017 | 2.19E-02 | 18865 |
| 156 | ACC_sup_R | -0.733 | -1.691 | 0.224  | 0.488 | -1.502 | -0.011 | 1.33E-01 | 18661 | -1.062 | -2.321 | 0.197  | 0.642 | -1.653 | -0.012 | 9.83E-02 | 18865 |
| 157 | N_Acc_L   | -0.262 | -0.540 | 0.017  | 0.142 | -1.842 | -0.013 | 6.55E-02 | 18661 | -0.316 | -0.682 | 0.050  | 0.187 | -1.694 | -0.012 | 9.04E-02 | 18865 |
| 158 | N_Acc_R   | -0.141 | -0.382 | 0.100  | 0.123 | -1.150 | -0.008 | 2.50E-01 | 18661 | -0.219 | -0.536 | 0.097  | 0.162 | -1.357 | -0.010 | 1.75E-01 | 18865 |
| 159 | VTA_L     | 0.012  | 0.002  | 0.021  | 0.005 | 2.318  | 0.017  | 2.04E-02 | 18661 | -0.004 | -0.016 | 0.009  | 0.007 | -0.538 | -0.004 | 5.91E-01 | 18865 |
| 160 | VTA_R     | 0.012  | 0.003  | 0.021  | 0.004 | 2.610  | 0.019  | 9.05E-03 | 18661 | -0.003 | -0.014 | 0.009  | 0.006 | -0.439 | -0.003 | 6.60E-01 | 18865 |
| 161 | SN_pc_L   | -0.005 | -0.020 | 0.011  | 0.008 | -0.581 | -0.004 | 5.62E-01 | 18661 | -0.008 | -0.028 | 0.013  | 0.011 | -0.741 | -0.005 | 4.59E-01 | 18865 |
| 162 | SN_pc_R   | -0.006 | -0.027 | 0.014  | 0.011 | -0.612 | -0.004 | 5.40E-01 | 18661 | -0.018 | -0.045 | 0.010  | 0.014 | -1.270 | -0.009 | 2.04E-01 | 18865 |
| 163 | SN_pr_L   | -0.011 | -0.033 | 0.010  | 0.011 | -1.042 | -0.008 | 2.97E-01 | 18661 | -0.008 | -0.036 | 0.020  | 0.014 | -0.561 | -0.004 | 5.75E-01 | 18865 |
| 164 | SN_pr_R   | -0.012 | -0.036 | 0.012  | 0.012 | -1.002 | -0.007 | 3.16E-01 | 18661 | -0.006 | -0.037 | 0.026  | 0.016 | -0.361 | -0.003 | 7.18E-01 | 18865 |
| 165 | Red_N_L   | 0.013  | -0.014 | 0.039  | 0.013 | 0.943  | 0.007  | 3.46E-01 | 18661 | -0.027 | -0.062 | 0.007  | 0.018 | -1.553 | -0.011 | 1.20E-01 | 18865 |
| 166 | Red_N_R   | 0.013  | -0.016 | 0.041  | 0.015 | 0.874  | 0.006  | 3.82E-01 | 18661 | -0.019 | -0.057 | 0.019  | 0.019 | -0.989 | -0.007 | 3.23E-01 | 18865 |
| 167 | LC_L      | 0.016  | 0.006  | 0.025  | 0.005 | 3.117  | 0.023  | 1.83E-03 | 18661 | 0.003  | -0.010 | 0.015  | 0.007 | 0.381  | 0.003  | 7.03E-01 | 18865 |
| 168 | LC_R      | 0.007  | -0.003 | 0.018  | 0.005 | 1.347  | 0.010  | 1.78E-01 | 18661 | 0.005  | -0.009 | 0.019  | 0.007 | 0.716  | 0.005  | 4.74E-01 | 18865 |
| 169 | Raphe_D   | 0.012  | -0.026 | 0.050  | 0.019 | 0.622  | 0.005  | 5.34E-01 | 18661 | -0.059 | -0.109 | -0.009 | 0.026 | -2.295 | -0.017 | 2.17E-02 | 18865 |
| 170 | Raphe_M   | 0.018  | 0.006  | 0.029  | 0.006 | 3.026  | 0.022  | 2.48E-03 | 18661 | -0.003 | -0.018 | 0.013  | 0.008 | -0.336 | -0.002 | 7.37E-01 | 18865 |

| Salad / raw vegetable intake |                      |         |          |         |        |        |        |          |       | Poultry intake |          |         |        |        |        |          |       |
|------------------------------|----------------------|---------|----------|---------|--------|--------|--------|----------|-------|----------------|----------|---------|--------|--------|--------|----------|-------|
| Number                       | AAL 3 region         | beta    | 95%CI_l  | 95%CI_h | se     | t      | r      | p        | df.e  | beta           | 95%CI_l  | 95%CI_h | se     | t      | r      | p        | df.e  |
| 0                            | Total brain          | -68.496 | -147.064 | 10.071  | 40.084 | -1.709 | -0.012 | 8.75E-02 | 18701 | -148.310       | -295.115 | -1.505  | 74.897 | -1.980 | -0.014 | 4.77E-02 | 18863 |
| 1                            | Precentral_L         | -1.398  | -4.157   | 1.362   | 1.408  | -0.993 | -0.007 | 3.21E-01 | 18701 | -3.477         | -8.637   | 1.682   | 2.632  | -1.321 | -0.010 | 1.87E-01 | 18863 |
| 2                            | Precentral_R         | -0.212  | -2.741   | 2.318   | 1.290  | -0.164 | -0.001 | 8.70E-01 | 18701 | -2.975         | -7.703   | 1.754   | 2.412  | -1.233 | -0.009 | 2.18E-01 | 18863 |
| 3                            | Frontal_Sup_2_L      | -3.487  | -6.403   | -0.571  | 1.488  | -2.344 | -0.017 | 1.91E-02 | 18701 | -3.175         | -8.626   | 2.275   | 2.781  | -1.142 | -0.008 | 2.53E-01 | 18863 |
| 4                            | Frontal_Sup_2_R      | -2.337  | -5.551   | 0.878   | 1.640  | -1.425 | -0.010 | 1.54E-01 | 18701 | -6.316         | -12.323  | -0.310  | 3.065  | -2.061 | -0.015 | 3.93E-02 | 18863 |
| 5                            | Frontal_Mid_2_L      | -1.851  | -4.914   | 1.212   | 1.563  | -1.185 | -0.009 | 2.36E-01 | 18701 | -4.395         | -10.120  | 1.329   | 2.920  | -1.505 | -0.011 | 1.32E-01 | 18863 |
| 6                            | Frontal_Mid_2_R      | -2.177  | -5.641   | 1.287   | 1.767  | -1.232 | -0.009 | 2.18E-01 | 18701 | -9.997         | -16.474  | -3.521  | 3.304  | -3.026 | -0.022 | 2.48E-03 | 18863 |
| 7                            | Frontal_Inf_Oper_L   | -0.200  | -1.105   | 0.705   | 0.462  | -0.434 | -0.003 | 6.64E-01 | 18701 | -1.180         | -2.871   | 0.511   | 0.863  | -1.368 | -0.010 | 1.71E-01 | 18863 |
| 8                            | Frontal_Inf_Oper_R   | -0.900  | -2.034   | 0.235   | 0.579  | -1.555 | -0.011 | 1.20E-01 | 18701 | -2.092         | -4.213   | 0.029   | 1.082  | -1.933 | -0.014 | 5.33E-02 | 18863 |
| 9                            | Frontal_Inf_Tri_L    | -1.225  | -3.146   | 0.695   | 0.980  | -1.251 | -0.009 | 2.11E-01 | 18701 | -3.536         | -7.126   | 0.053   | 1.831  | -1.931 | -0.014 | 5.35E-02 | 18863 |
| 10                           | Frontal_Inf_Tri_R    | 0.528   | -0.981   | 2.036   | 0.769  | 0.686  | 0.005  | 4.93E-01 | 18701 | -3.345         | -6.164   | -0.525  | 1.438  | -2.325 | -0.017 | 2.01E-02 | 18863 |
| 11                           | Frontal_Inf_Orb_2_L  | -0.477  | -1.052   | 0.097   | 0.293  | -1.628 | -0.012 | 1.04E-01 | 18701 | -0.872         | -1.946   | 0.201   | 0.548  | -1.592 | -0.012 | 1.11E-01 | 18863 |
| 12                           | Frontal_Inf_Orb_2_R  | -0.137  | -0.738   | 0.464   | 0.307  | -0.446 | -0.003 | 6.55E-01 | 18701 | -1.172         | -2.295   | -0.050  | 0.573  | -2.047 | -0.015 | 4.06E-02 | 18863 |
| 13                           | Rolandic_Oper_L      | -0.712  | -1.581   | 0.157   | 0.443  | -1.605 | -0.012 | 1.08E-01 | 18701 | -1.528         | -3.152   | 0.096   | 0.828  | -1.844 | -0.013 | 6.52E-02 | 18863 |
| 14                           | Rolandic_Oper_R      | -0.382  | -1.627   | 0.862   | 0.635  | -0.602 | -0.004 | 5.47E-01 | 18701 | -2.987         | -5.311   | -0.664  | 1.185  | -2.520 | -0.018 | 1.17E-02 | 18863 |
| 15                           | Supp_Motor_Area_L    | -1.381  | -3.448   | 0.686   | 1.055  | -1.310 | -0.010 | 1.90E-01 | 18701 | -3.304         | -7.165   | 0.557   | 1.970  | -1.677 | -0.012 | 9.35E-02 | 18863 |
| 16                           | Supp_Motor_Area_R    | -0.314  | -2.596   | 1.968   | 1.164  | -0.270 | -0.002 | 7.87E-01 | 18701 | -1.632         | -5.898   | 2.633   | 2.176  | -0.750 | -0.005 | 4.53E-01 | 18863 |
| 17                           | Olfactory_L          | -0.339  | -0.646   | -0.032  | 0.157  | -2.165 | -0.016 | 3.04E-02 | 18701 | 0.185          | -0.389   | 0.759   | 0.293  | 0.633  | 0.005  | 5.27E-01 | 18863 |
| 18                           | Olfactory_R          | -0.383  | -0.692   | -0.075  | 0.157  | -2.440 | -0.018 | 1.47E-02 | 18701 | -0.008         | -0.584   | 0.567   | 0.294  | -0.028 | 0.000  | 9.78E-01 | 18863 |
| 19                           | Frontal_Sup_Medial_L | -2.508  | -4.445   | -0.571  | 0.988  | -2.538 | -0.019 | 1.11E-02 | 18701 | -6.506         | -10.125  | -2.887  | 1.846  | -3.524 | -0.026 | 4.26E-04 | 18863 |
| 20                           | Frontal_Sup_Medial_R | -1.418  | -2.828   | -0.008  | 0.719  | -1.972 | -0.014 | 4.87E-02 | 18701 | -3.760         | -6.394   | -1.127  | 1.343  | -2.799 | -0.020 | 5.13E-03 | 18863 |
| 21                           | Frontal_Med_Orb_L    | -1.253  | -1.976   | -0.529  | 0.369  | -3.393 | -0.025 | 6.92E-04 | 18701 | -0.752         | -2.104   | 0.601   | 0.690  | -1.089 | -0.008 | 2.76E-01 | 18863 |
| 22                           | Frontal_Med_Orb_R    | -1.519  | -2.408   | -0.630  | 0.454  | -3.348 | -0.024 | 8.15E-04 | 18701 | -1.929         | -3.591   | -0.268  | 0.848  | -2.276 | -0.017 | 2.29E-02 | 18863 |
| 23                           | Rectus_L             | -0.826  | -1.576   | -0.077  | 0.382  | -2.161 | -0.016 | 3.07E-02 | 18701 | -1.402         | -2.802   | -0.003  | 0.714  | -1.964 | -0.014 | 4.96E-02 | 18863 |
| 24                           | Rectus_R             | -0.622  | -1.315   | 0.071   | 0.354  | -1.758 | -0.013 | 7.87E-02 | 18701 | -1.526         | -2.821   | -0.232  | 0.661  | -2.311 | -0.017 | 2.09E-02 | 18863 |
| 25                           | OFCmed_L             | -0.531  | -0.966   | -0.097  | 0.222  | -2.397 | -0.018 | 1.66E-02 | 18701 | -1.055         | -1.866   | -0.244  | 0.414  | -2.549 | -0.019 | 1.08E-02 | 18863 |
| 26                           | OFCmed_R             | -0.787  | -1.293   | -0.281  | 0.258  | -3.048 | -0.022 | 2.31E-03 | 18701 | -0.870         | -1.815   | 0.076   | 0.482  | -1.803 | -0.013 | 7.14E-02 | 18863 |
| 27                           | OFCant_L             | -0.717  | -1.219   | -0.215  | 0.256  | -2.798 | -0.020 | 5.15E-03 | 18701 | -0.342         | -1.280   | 0.596   | 0.478  | -0.715 | -0.005 | 4.75E-01 | 18863 |
| 28                           | OFCant_R             | -0.897  | -1.560   | -0.234  | 0.338  | -2.651 | -0.019 | 8.04E-03 | 18701 | -1.074         | -2.312   | 0.165   | 0.632  | -1.700 | -0.012 | 8.92E-02 | 18863 |

|    |                      |        |        |        |       |        |        |          |       |        |         |        |       |        |        |          |       |
|----|----------------------|--------|--------|--------|-------|--------|--------|----------|-------|--------|---------|--------|-------|--------|--------|----------|-------|
| 29 | OFCpost_L            | -0.812 | -1.440 | -0.183 | 0.321 | -2.531 | -0.019 | 1.14E-02 | 18701 | -0.057 | -1.231  | 1.117  | 0.599 | -0.096 | -0.001 | 9.24E-01 | 18863 |
| 30 | OFCpost_R            | -0.884 | -1.465 | -0.304 | 0.296 | -2.985 | -0.022 | 2.84E-03 | 18701 | -0.645 | -1.730  | 0.440  | 0.554 | -1.165 | -0.008 | 2.44E-01 | 18863 |
| 31 | OFClat_L             | -0.154 | -0.367 | 0.058  | 0.108 | -1.427 | -0.010 | 1.54E-01 | 18701 | -0.545 | -0.941  | -0.149 | 0.202 | -2.697 | -0.020 | 7.00E-03 | 18863 |
| 32 | OFClat_R             | -0.110 | -0.289 | 0.069  | 0.091 | -1.202 | -0.009 | 2.29E-01 | 18701 | -0.511 | -0.845  | -0.176 | 0.171 | -2.991 | -0.022 | 2.79E-03 | 18863 |
| 33 | Insula_L             | -1.714 | -3.658 | 0.230  | 0.992 | -1.728 | -0.013 | 8.40E-02 | 18701 | -2.125 | -5.757  | 1.506  | 1.853 | -1.147 | -0.008 | 2.51E-01 | 18863 |
| 34 | Insula_R             | -1.254 | -3.149 | 0.641  | 0.967 | -1.297 | -0.009 | 1.95E-01 | 18701 | -2.963 | -6.502  | 0.576  | 1.805 | -1.641 | -0.012 | 1.01E-01 | 18863 |
| 37 | Cingulate_Mid_L      | 0.790  | -0.856 | 2.435  | 0.839 | 0.941  | 0.007  | 3.47E-01 | 18701 | -4.683 | -7.755  | -1.611 | 1.567 | -2.988 | -0.022 | 2.81E-03 | 18863 |
| 38 | Cingulate_Mid_R      | 0.269  | -1.484 | 2.022  | 0.894 | 0.301  | 0.002  | 7.63E-01 | 18701 | -5.824 | -9.098  | -2.550 | 1.671 | -3.486 | -0.025 | 4.91E-04 | 18863 |
| 39 | Cingulate_Post_L     | -0.394 | -0.896 | 0.108  | 0.256 | -1.539 | -0.011 | 1.24E-01 | 18701 | -0.906 | -1.843  | 0.031  | 0.478 | -1.894 | -0.014 | 5.82E-02 | 18863 |
| 40 | Cingulate_Post_R     | -0.256 | -0.535 | 0.022  | 0.142 | -1.805 | -0.013 | 7.10E-02 | 18701 | -0.298 | -0.818  | 0.222  | 0.265 | -1.124 | -0.008 | 2.61E-01 | 18863 |
| 41 | Hippocampus_L        | 0.320  | -0.492 | 1.131  | 0.414 | 0.772  | 0.006  | 4.40E-01 | 18701 | -1.671 | -3.187  | -0.155 | 0.774 | -2.160 | -0.016 | 3.08E-02 | 18863 |
| 42 | Hippocampus_R        | 0.443  | -0.399 | 1.285  | 0.430 | 1.031  | 0.008  | 3.03E-01 | 18701 | -0.835 | -2.407  | 0.738  | 0.802 | -1.040 | -0.008 | 2.98E-01 | 18863 |
| 43 | ParaHippocampaL_L    | 0.258  | -0.462 | 0.979  | 0.368 | 0.703  | 0.005  | 4.82E-01 | 18701 | -1.649 | -2.996  | -0.302 | 0.687 | -2.399 | -0.017 | 1.64E-02 | 18863 |
| 44 | ParaHippocampaL_R    | 0.521  | -0.389 | 1.432  | 0.464 | 1.122  | 0.008  | 2.62E-01 | 18701 | -1.919 | -3.620  | -0.218 | 0.868 | -2.211 | -0.016 | 2.71E-02 | 18863 |
| 45 | Amygdala_L           | -0.127 | -0.407 | 0.154  | 0.143 | -0.886 | -0.006 | 3.76E-01 | 18701 | -0.216 | -0.739  | 0.308  | 0.267 | -0.807 | -0.006 | 4.20E-01 | 18863 |
| 46 | Amygdala_R           | -0.192 | -0.479 | 0.095  | 0.146 | -1.313 | -0.010 | 1.89E-01 | 18701 | -0.195 | -0.731  | 0.340  | 0.273 | -0.714 | -0.005 | 4.75E-01 | 18863 |
| 47 | Calcarine_L          | -0.508 | -3.181 | 2.164  | 1.363 | -0.373 | -0.003 | 7.09E-01 | 18701 | 3.198  | -1.797  | 8.192  | 2.548 | 1.255  | 0.009  | 2.10E-01 | 18863 |
| 48 | Calcarine_R          | -0.456 | -2.689 | 1.777  | 1.139 | -0.400 | -0.003 | 6.89E-01 | 18701 | 0.322  | -3.852  | 4.495  | 2.129 | 0.151  | 0.001  | 8.80E-01 | 18863 |
| 49 | Cuneus_L             | 0.003  | -1.676 | 1.682  | 0.856 | 0.004  | 0.000  | 9.97E-01 | 18701 | 2.164  | -0.972  | 5.300  | 1.600 | 1.353  | 0.010  | 1.76E-01 | 18863 |
| 50 | Cuneus_R             | -0.450 | -1.734 | 0.834  | 0.655 | -0.687 | -0.005 | 4.92E-01 | 18701 | -0.716 | -3.114  | 1.683  | 1.224 | -0.585 | -0.004 | 5.59E-01 | 18863 |
| 51 | Lingual_L            | 0.509  | -1.101 | 2.119  | 0.821 | 0.619  | 0.005  | 5.36E-01 | 18701 | 0.494  | -2.513  | 3.501  | 1.534 | 0.322  | 0.002  | 7.47E-01 | 18863 |
| 52 | Lingual_R            | -0.214 | -1.899 | 1.471  | 0.860 | -0.249 | -0.002 | 8.03E-01 | 18701 | -0.037 | -3.185  | 3.112  | 1.606 | -0.023 | 0.000  | 9.82E-01 | 18863 |
| 53 | Occipital_Sup_L      | 0.251  | -0.856 | 1.357  | 0.564 | 0.444  | 0.003  | 6.57E-01 | 18701 | -0.644 | -2.712  | 1.423  | 1.055 | -0.611 | -0.004 | 5.41E-01 | 18863 |
| 54 | Occipital_Sup_R      | -0.232 | -1.431 | 0.968  | 0.612 | -0.379 | -0.003 | 7.05E-01 | 18701 | -0.964 | -3.205  | 1.276  | 1.143 | -0.844 | -0.006 | 3.99E-01 | 18863 |
| 55 | Occipital_Mid_L      | -0.758 | -3.349 | 1.833  | 1.322 | -0.574 | -0.004 | 5.66E-01 | 18701 | 0.741  | -4.101  | 5.583  | 2.470 | 0.300  | 0.002  | 7.64E-01 | 18863 |
| 56 | Occipital_Mid_R      | -1.931 | -3.735 | -0.128 | 0.920 | -2.099 | -0.015 | 3.58E-02 | 18701 | 1.394  | -1.976  | 4.765  | 1.720 | 0.811  | 0.006  | 4.17E-01 | 18863 |
| 57 | Occipital_Inf_L      | -1.084 | -1.943 | -0.225 | 0.438 | -2.472 | -0.018 | 1.34E-02 | 18701 | 1.373  | -0.233  | 2.980  | 0.820 | 1.676  | 0.012  | 9.38E-02 | 18863 |
| 58 | Occipital_Inf_R      | -1.734 | -2.728 | -0.740 | 0.507 | -3.419 | -0.025 | 6.31E-04 | 18701 | 1.817  | -0.040  | 3.674  | 0.947 | 1.918  | 0.014  | 5.51E-02 | 18863 |
| 59 | Fusiform_L           | -0.098 | -1.982 | 1.786  | 0.961 | -0.102 | -0.001 | 9.19E-01 | 18701 | -0.632 | -4.151  | 2.886  | 1.795 | -0.352 | -0.003 | 7.25E-01 | 18863 |
| 60 | Fusiform_R           | -0.054 | -2.122 | 2.015  | 1.055 | -0.051 | 0.000  | 9.59E-01 | 18701 | -1.312 | -5.179  | 2.554  | 1.973 | -0.665 | -0.005 | 5.06E-01 | 18863 |
| 61 | Postcentral_L        | 1.510  | -1.324 | 4.343  | 1.445 | 1.044  | 0.008  | 2.96E-01 | 18701 | -9.734 | -15.027 | -4.441 | 2.700 | -3.605 | -0.026 | 3.13E-04 | 18863 |
| 62 | Postcentral_R        | 3.036  | 0.134  | 5.939  | 1.481 | 2.050  | 0.015  | 4.04E-02 | 18701 | -7.986 | -13.407 | -2.564 | 2.766 | -2.887 | -0.021 | 3.89E-03 | 18863 |
| 63 | Parietal_Sup_L       | -0.467 | -2.100 | 1.165  | 0.833 | -0.561 | -0.004 | 5.75E-01 | 18701 | -2.713 | -5.762  | 0.337  | 1.556 | -1.744 | -0.013 | 8.12E-02 | 18863 |
| 64 | Parietal_Sup_R       | 0.172  | -1.275 | 1.620  | 0.738 | 0.233  | 0.002  | 8.16E-01 | 18701 | -1.105 | -3.809  | 1.599  | 1.380 | -0.801 | -0.006 | 4.23E-01 | 18863 |
| 65 | Parietal_Inf_L       | -1.631 | -3.768 | 0.506  | 1.090 | -1.496 | -0.011 | 1.35E-01 | 18701 | -3.189 | -7.182  | 0.804  | 2.037 | -1.565 | -0.011 | 1.17E-01 | 18863 |
| 66 | Parietal_Inf_R       | -0.177 | -1.562 | 1.207  | 0.706 | -0.251 | -0.002 | 8.02E-01 | 18701 | -2.139 | -4.727  | 0.450  | 1.321 | -1.620 | -0.012 | 1.05E-01 | 18863 |
| 67 | SupraMarginal_L      | -0.891 | -2.143 | 0.361  | 0.639 | -1.395 | -0.010 | 1.63E-01 | 18701 | -4.162 | -6.501  | -1.822 | 1.194 | -3.487 | -0.025 | 4.90E-04 | 18863 |
| 68 | SupraMarginal_R      | -0.327 | -2.100 | 1.447  | 0.905 | -0.361 | -0.003 | 7.18E-01 | 18701 | -5.384 | -8.697  | -2.072 | 1.690 | -3.186 | -0.023 | 1.44E-03 | 18863 |
| 69 | Angular_L            | -0.646 | -1.876 | 0.585  | 0.628 | -1.028 | -0.008 | 3.04E-01 | 18701 | -0.459 | -2.758  | 1.841  | 1.173 | -0.391 | -0.003 | 6.96E-01 | 18863 |
| 70 | Angular_R            | -0.206 | -1.855 | 1.443  | 0.841 | -0.244 | -0.002 | 8.07E-01 | 18701 | 0.030  | -3.051  | 3.112  | 1.572 | 0.019  | 0.000  | 9.85E-01 | 18863 |
| 71 | Precuneus_L          | -0.684 | -3.685 | 2.318  | 1.531 | -0.447 | -0.003 | 6.55E-01 | 18701 | -3.888 | -9.492  | 1.716  | 2.859 | -1.360 | -0.010 | 1.74E-01 | 18863 |
| 72 | Precuneus_R          | -1.653 | -4.326 | 1.021  | 1.364 | -1.212 | -0.009 | 2.26E-01 | 18701 | -2.945 | -7.937  | 2.046  | 2.547 | -1.157 | -0.008 | 2.47E-01 | 18863 |
| 73 | Paracentral_Lobule_L | 0.557  | -0.816 | 1.930  | 0.700 | 0.795  | 0.006  | 4.27E-01 | 18701 | -2.086 | -4.652  | 0.479  | 1.309 | -1.594 | -0.012 | 1.11E-01 | 18863 |
| 74 | Paracentral_Lobule_R | 0.249  | -0.735 | 1.233  | 0.502 | 0.496  | 0.004  | 6.20E-01 | 18701 | -0.706 | -2.543  | 1.131  | 0.937 | -0.753 | -0.005 | 4.51E-01 | 18863 |
| 75 | Caudate_L            | -0.167 | -1.265 | 0.930  | 0.560 | -0.299 | -0.002 | 7.65E-01 | 18701 | -1.661 | -3.710  | 0.388  | 1.045 | -1.589 | -0.012 | 1.12E-01 | 18863 |
| 76 | Caudate_R            | -0.529 | -1.772 | 0.713  | 0.634 | -0.835 | -0.006 | 4.04E-01 | 18701 | -1.454 | -3.776  | 0.868  | 1.185 | -1.228 | -0.009 | 2.20E-01 | 18863 |
| 77 | Putamen_L            | -1.129 | -2.794 | 0.535  | 0.849 | -1.330 | -0.010 | 1.84E-01 | 18701 | 0.542  | -2.570  | 3.654  | 1.588 | 0.341  | 0.002  | 7.33E-01 | 18863 |
| 78 | Putamen_R            | -1.251 | -2.947 | 0.445  | 0.865 | -1.446 | -0.011 | 1.48E-01 | 18701 | -0.232 | -3.402  | 2.939  | 1.617 | -0.143 | -0.001 | 8.86E-01 | 18863 |
| 79 | Pallidum_L           | 0.050  | -0.098 | 0.198  | 0.076 | 0.658  | 0.005  | 5.10E-01 | 18701 | -0.073 | -0.350  | 0.204  | 0.141 | -0.517 | -0.004 | 6.05E-01 | 18863 |

|     |                     |        |        |        |       |        |        |          |       |        |         |        |       |        |        |          |       |
|-----|---------------------|--------|--------|--------|-------|--------|--------|----------|-------|--------|---------|--------|-------|--------|--------|----------|-------|
| 80  | Pallidum_R          | -0.001 | -0.164 | 0.161  | 0.083 | -0.018 | 0.000  | 9.86E-01 | 18701 | -0.072 | -0.376  | 0.232  | 0.155 | -0.465 | -0.003 | 6.42E-01 | 18863 |
| 83  | Heschl_L            | -0.313 | -0.613 | -0.012 | 0.153 | -2.041 | -0.015 | 4.12E-02 | 18701 | -0.388 | -0.949  | 0.173  | 0.286 | -1.357 | -0.010 | 1.75E-01 | 18863 |
| 84  | Heschl_R            | -0.112 | -0.447 | 0.224  | 0.171 | -0.652 | -0.005 | 5.15E-01 | 18701 | -0.484 | -1.111  | 0.142  | 0.320 | -1.515 | -0.011 | 1.30E-01 | 18863 |
| 85  | Temporal_Sup_L      | -2.957 | -5.123 | -0.790 | 1.105 | -2.675 | -0.020 | 7.48E-03 | 18701 | -5.829 | -9.875  | -1.782 | 2.065 | -2.823 | -0.021 | 4.76E-03 | 18863 |
| 86  | Temporal_Sup_R      | -1.863 | -4.262 | 0.535  | 1.224 | -1.523 | -0.011 | 1.28E-01 | 18701 | -6.876 | -11.356 | -2.395 | 2.286 | -3.008 | -0.022 | 2.63E-03 | 18863 |
| 87  | Temporal_Pole_Sup_L | -1.280 | -2.306 | -0.253 | 0.524 | -2.444 | -0.018 | 1.45E-02 | 18701 | -1.308 | -3.227  | 0.610  | 0.979 | -1.337 | -0.010 | 1.81E-01 | 18863 |
| 88  | Temporal_Pole_Sup_R | -1.106 | -2.186 | -0.026 | 0.551 | -2.008 | -0.015 | 4.46E-02 | 18701 | -1.510 | -3.529  | 0.510  | 1.030 | -1.465 | -0.011 | 1.43E-01 | 18863 |
| 89  | Temporal_Mid_L      | -2.179 | -5.791 | 1.434  | 1.843 | -1.182 | -0.009 | 2.37E-01 | 18701 | -6.195 | -12.944 | 0.555  | 3.444 | -1.799 | -0.013 | 7.21E-02 | 18863 |
| 90  | Temporal_Mid_R      | -2.706 | -5.915 | 0.502  | 1.637 | -1.653 | -0.012 | 9.83E-02 | 18701 | -3.720 | -9.714  | 2.274  | 3.058 | -1.216 | -0.009 | 2.24E-01 | 18863 |
| 91  | Temporal_Pole_Mid_L | -0.185 | -1.048 | 0.678  | 0.440 | -0.421 | -0.003 | 6.74E-01 | 18701 | -1.599 | -3.212  | 0.014  | 0.823 | -1.944 | -0.014 | 5.20E-02 | 18863 |
| 92  | Temporal_Pole_Mid_R | -0.533 | -1.580 | 0.514  | 0.534 | -0.998 | -0.007 | 3.19E-01 | 18701 | -1.545 | -3.503  | 0.414  | 0.999 | -1.546 | -0.011 | 1.22E-01 | 18863 |
| 93  | Temporal_Inf_L      | -0.860 | -3.343 | 1.624  | 1.267 | -0.679 | -0.005 | 4.97E-01 | 18701 | -2.116 | -6.757  | 2.525  | 2.368 | -0.894 | -0.007 | 3.71E-01 | 18863 |
| 94  | Temporal_Inf_R      | -3.086 | -5.795 | -0.377 | 1.382 | -2.233 | -0.016 | 2.55E-02 | 18701 | -0.655 | -5.715  | 4.405  | 2.582 | -0.254 | -0.002 | 8.00E-01 | 18863 |
| 95  | Cerebellum_Crus1_L  | -1.475 | -4.426 | 1.476  | 1.505 | -0.980 | -0.007 | 3.27E-01 | 18701 | 5.928  | 0.416   | 11.440 | 2.812 | 2.108  | 0.015  | 3.50E-02 | 18863 |
| 96  | Cerebellum_Crus1_R  | -0.529 | -3.538 | 2.479  | 1.535 | -0.345 | -0.003 | 7.30E-01 | 18701 | 6.256  | 0.637   | 11.875 | 2.867 | 2.182  | 0.016  | 2.91E-02 | 18863 |
| 97  | Cerebellum_Crus2_L  | -1.499 | -3.840 | 0.842  | 1.194 | -1.255 | -0.009 | 2.09E-01 | 18701 | 0.039  | -4.333  | 4.411  | 2.231 | 0.017  | 0.000  | 9.86E-01 | 18863 |
| 98  | Cerebellum_Crus2_R  | 0.185  | -1.978 | 2.348  | 1.104 | 0.168  | 0.001  | 8.67E-01 | 18701 | 0.947  | -3.094  | 4.988  | 2.062 | 0.459  | 0.003  | 6.46E-01 | 18863 |
| 99  | Cerebellum_3_L      | 0.082  | -0.075 | 0.239  | 0.080 | 1.020  | 0.007  | 3.08E-01 | 18701 | 0.568  | 0.275   | 0.861  | 0.150 | 3.797  | 0.028  | 1.47E-04 | 18863 |
| 100 | Cerebellum_3_R      | 0.046  | -0.166 | 0.257  | 0.108 | 0.423  | 0.003  | 6.73E-01 | 18701 | 0.536  | 0.141   | 0.932  | 0.202 | 2.657  | 0.019  | 7.88E-03 | 18863 |
| 101 | Cerebellum_4_5_L    | 0.623  | -0.646 | 1.892  | 0.647 | 0.962  | 0.007  | 3.36E-01 | 18701 | 2.660  | 0.288   | 5.032  | 1.210 | 2.198  | 0.016  | 2.80E-02 | 18863 |
| 102 | Cerebellum_4_5_R    | 0.371  | -0.663 | 1.405  | 0.528 | 0.703  | 0.005  | 4.82E-01 | 18701 | 0.933  | -0.999  | 2.866  | 0.986 | 0.947  | 0.007  | 3.44E-01 | 18863 |
| 103 | Cerebellum_6_L      | 0.720  | -1.474 | 2.915  | 1.120 | 0.643  | 0.005  | 5.20E-01 | 18701 | 2.891  | -1.212  | 6.994  | 2.093 | 1.381  | 0.010  | 1.67E-01 | 18863 |
| 104 | Cerebellum_6_R      | 0.813  | -1.499 | 3.125  | 1.179 | 0.689  | 0.005  | 4.91E-01 | 18701 | 4.090  | -0.231  | 8.412  | 2.205 | 1.855  | 0.014  | 6.36E-02 | 18863 |
| 105 | Cerebellum_7b_L     | -0.385 | -1.100 | 0.331  | 0.365 | -1.054 | -0.008 | 2.92E-01 | 18701 | 0.084  | -1.252  | 1.421  | 0.682 | 0.124  | 0.001  | 9.01E-01 | 18863 |
| 106 | Cerebellum_7b_R     | -0.012 | -0.721 | 0.697  | 0.362 | -0.034 | 0.000  | 9.73E-01 | 18701 | -0.737 | -2.061  | 0.587  | 0.676 | -1.091 | -0.008 | 2.75E-01 | 18863 |
| 107 | Cerebellum_8_L      | -0.973 | -3.244 | 1.298  | 1.159 | -0.840 | -0.006 | 4.01E-01 | 18701 | 2.254  | -1.990  | 6.499  | 2.166 | 1.041  | 0.008  | 2.98E-01 | 18863 |
| 108 | Cerebellum_8_R      | -2.084 | -5.040 | 0.872  | 1.508 | -1.382 | -0.010 | 1.67E-01 | 18701 | -2.102 | -7.627  | 3.422  | 2.819 | -0.746 | -0.005 | 4.56E-01 | 18863 |
| 109 | Cerebellum_9_L      | -0.458 | -1.742 | 0.825  | 0.655 | -0.700 | -0.005 | 4.84E-01 | 18701 | 3.481  | 1.082   | 5.879  | 1.224 | 2.845  | 0.021  | 4.45E-03 | 18863 |
| 110 | Cerebellum_9_R      | -0.500 | -1.762 | 0.762  | 0.644 | -0.777 | -0.006 | 4.37E-01 | 18701 | 3.265  | 0.907   | 5.623  | 1.203 | 2.714  | 0.020  | 6.65E-03 | 18863 |
| 111 | Cerebellum_10_L     | -0.129 | -0.219 | -0.038 | 0.046 | -2.773 | -0.020 | 5.56E-03 | 18701 | 0.222  | 0.052   | 0.392  | 0.087 | 2.564  | 0.019  | 1.04E-02 | 18863 |
| 112 | Cerebellum_10_R     | -0.044 | -0.139 | 0.050  | 0.048 | -0.915 | -0.007 | 3.60E-01 | 18701 | 0.204  | 0.027   | 0.381  | 0.090 | 2.264  | 0.016  | 2.36E-02 | 18863 |
| 113 | Vermis_1_2          | 0.038  | -0.021 | 0.098  | 0.030 | 1.275  | 0.009  | 2.02E-01 | 18701 | 0.193  | 0.082   | 0.303  | 0.056 | 3.423  | 0.025  | 6.20E-04 | 18863 |
| 114 | Vermis_3            | 0.073  | -0.162 | 0.308  | 0.120 | 0.608  | 0.004  | 5.43E-01 | 18701 | 0.585  | 0.145   | 1.024  | 0.224 | 2.608  | 0.019  | 9.12E-03 | 18863 |
| 115 | Vermis_4_5          | 0.481  | -0.211 | 1.172  | 0.353 | 1.363  | 0.010  | 1.73E-01 | 18701 | 1.070  | -0.222  | 2.362  | 0.659 | 1.624  | 0.012  | 1.04E-01 | 18863 |
| 116 | Vermis_6            | 0.214  | -0.171 | 0.599  | 0.196 | 1.089  | 0.008  | 2.76E-01 | 18701 | 1.118  | 0.398   | 1.837  | 0.367 | 3.046  | 0.022  | 2.33E-03 | 18863 |
| 117 | Vermis_7            | 0.065  | -0.153 | 0.283  | 0.111 | 0.585  | 0.004  | 5.59E-01 | 18701 | 0.615  | 0.208   | 1.022  | 0.208 | 2.964  | 0.022  | 3.04E-03 | 18863 |
| 118 | Vermis_8            | 0.254  | -0.103 | 0.612  | 0.182 | 1.393  | 0.010  | 1.64E-01 | 18701 | 1.391  | 0.723   | 2.059  | 0.341 | 4.079  | 0.030  | 4.54E-05 | 18863 |
| 119 | Vermis_9            | 0.162  | -0.129 | 0.452  | 0.148 | 1.092  | 0.008  | 2.75E-01 | 18701 | 0.928  | 0.386   | 1.470  | 0.277 | 3.354  | 0.024  | 7.97E-04 | 18863 |
| 120 | Vermis_10           | 0.043  | -0.038 | 0.124  | 0.041 | 1.050  | 0.008  | 2.94E-01 | 18701 | 0.351  | 0.200   | 0.502  | 0.077 | 4.555  | 0.033  | 5.28E-06 | 18863 |
| 121 | Thal_AV_L           | 0.000  | -0.032 | 0.033  | 0.016 | 0.022  | 0.000  | 9.82E-01 | 18701 | -0.050 | -0.110  | 0.011  | 0.031 | -1.613 | -0.012 | 1.07E-01 | 18863 |
| 122 | Thal_AV_R           | 0.027  | -0.019 | 0.073  | 0.024 | 1.133  | 0.008  | 2.57E-01 | 18701 | -0.082 | -0.168  | 0.004  | 0.044 | -1.863 | -0.014 | 6.25E-02 | 18863 |
| 123 | Thal_LP_L           | -0.013 | -0.049 | 0.023  | 0.018 | -0.695 | -0.005 | 4.87E-01 | 18701 | -0.129 | -0.196  | -0.062 | 0.034 | -3.764 | -0.027 | 1.68E-04 | 18863 |
| 124 | Thal_LP_R           | 0.004  | -0.043 | 0.050  | 0.024 | 0.156  | 0.001  | 8.76E-01 | 18701 | -0.129 | -0.216  | -0.042 | 0.045 | -2.894 | -0.021 | 3.80E-03 | 18863 |
| 125 | Thal_VA_L           | -0.001 | -0.039 | 0.037  | 0.020 | -0.041 | 0.000  | 9.67E-01 | 18701 | -0.020 | -0.091  | 0.051  | 0.036 | -0.548 | -0.004 | 5.83E-01 | 18863 |
| 126 | Thal_VA_R           | -0.005 | -0.052 | 0.042  | 0.024 | -0.219 | -0.002 | 8.27E-01 | 18701 | -0.036 | -0.124  | 0.052  | 0.045 | -0.802 | -0.006 | 4.22E-01 | 18863 |
| 127 | Thal_VL_L           | -0.081 | -0.190 | 0.028  | 0.056 | -1.453 | -0.011 | 1.46E-01 | 18701 | -0.272 | -0.476  | -0.069 | 0.104 | -2.620 | -0.019 | 8.81E-03 | 18863 |
| 128 | Thal_VL_R           | -0.050 | -0.195 | 0.094  | 0.074 | -0.685 | -0.005 | 4.94E-01 | 18701 | -0.469 | -0.739  | -0.199 | 0.138 | -3.403 | -0.025 | 6.69E-04 | 18863 |
| 129 | Thal_VPL_L          | -0.072 | -0.202 | 0.057  | 0.066 | -1.091 | -0.008 | 2.75E-01 | 18701 | -0.217 | -0.459  | 0.025  | 0.124 | -1.755 | -0.013 | 7.92E-02 | 18863 |
| 130 | Thal_VPL_R          | -0.045 | -0.181 | 0.091  | 0.070 | -0.649 | -0.005 | 5.16E-01 | 18701 | -0.335 | -0.589  | -0.080 | 0.130 | -2.576 | -0.019 | 1.00E-02 | 18863 |

|     |            |        |        |        |       |        |        |          |       |        |        |        |       |        |        |          |       |
|-----|------------|--------|--------|--------|-------|--------|--------|----------|-------|--------|--------|--------|-------|--------|--------|----------|-------|
| 131 | Thal_IL_L  | -0.016 | -0.072 | 0.040  | 0.029 | -0.549 | -0.004 | 5.83E-01 | 18701 | -0.167 | -0.272 | -0.062 | 0.053 | -3.119 | -0.023 | 1.82E-03 | 18863 |
| 132 | Thal_IL_R  | -0.001 | -0.064 | 0.063  | 0.032 | -0.017 | 0.000  | 9.86E-01 | 18701 | -0.180 | -0.299 | -0.061 | 0.061 | -2.974 | -0.022 | 2.95E-03 | 18863 |
| 133 | Thal_Re_L  | 0.000  | 0.000  | 0.000  | 0.000 | 1.001  | 0.007  | 3.17E-01 | 18701 | 0.000  | -0.001 | 0.000  | 0.000 | -1.139 | -0.008 | 2.55E-01 | 18863 |
| 134 | Thal_Re_R  | 0.000  | -0.002 | 0.002  | 0.001 | 0.390  | 0.003  | 6.97E-01 | 18701 | -0.003 | -0.007 | 0.000  | 0.002 | -1.861 | -0.014 | 6.28E-02 | 18863 |
| 135 | Thal_MDm_L | -0.137 | -0.553 | 0.278  | 0.212 | -0.647 | -0.005 | 5.18E-01 | 18701 | -1.353 | -2.129 | -0.577 | 0.396 | -3.417 | -0.025 | 6.35E-04 | 18863 |
| 136 | Thal_MDm_R | -0.011 | -0.493 | 0.472  | 0.246 | -0.043 | 0.000  | 9.66E-01 | 18701 | -1.150 | -2.052 | -0.248 | 0.460 | -2.498 | -0.018 | 1.25E-02 | 18863 |
| 137 | Thal_MDl_L | -0.033 | -0.104 | 0.039  | 0.037 | -0.887 | -0.006 | 3.75E-01 | 18701 | -0.278 | -0.412 | -0.144 | 0.069 | -4.054 | -0.030 | 5.05E-05 | 18863 |
| 138 | Thal_MDl_R | -0.003 | -0.085 | 0.078  | 0.042 | -0.084 | -0.001 | 9.33E-01 | 18701 | -0.241 | -0.394 | -0.088 | 0.078 | -3.095 | -0.023 | 1.97E-03 | 18863 |
| 139 | Thal_LGN_L | 0.000  | -0.011 | 0.010  | 0.006 | -0.082 | -0.001 | 9.35E-01 | 18701 | -0.034 | -0.054 | -0.013 | 0.010 | -3.252 | -0.024 | 1.15E-03 | 18863 |
| 140 | Thal_LGN_R | -0.007 | -0.030 | 0.016  | 0.012 | -0.599 | -0.004 | 5.49E-01 | 18701 | -0.090 | -0.133 | -0.047 | 0.022 | -4.068 | -0.030 | 4.76E-05 | 18863 |
| 141 | Thal_MGN_L | -0.021 | -0.041 | -0.002 | 0.010 | -2.154 | -0.016 | 3.12E-02 | 18701 | -0.049 | -0.086 | -0.013 | 0.019 | -2.654 | -0.019 | 7.97E-03 | 18863 |
| 142 | Thal_MGN_R | -0.011 | -0.032 | 0.010  | 0.011 | -1.046 | -0.008 | 2.95E-01 | 18701 | -0.066 | -0.106 | -0.026 | 0.020 | -3.271 | -0.024 | 1.07E-03 | 18863 |
| 143 | Thal_PuA_L | -0.015 | -0.038 | 0.008  | 0.012 | -1.243 | -0.009 | 2.14E-01 | 18701 | -0.064 | -0.107 | -0.021 | 0.022 | -2.895 | -0.021 | 3.80E-03 | 18863 |
| 144 | Thal_PuA_R | -0.019 | -0.066 | 0.029  | 0.024 | -0.764 | -0.006 | 4.45E-01 | 18701 | -0.139 | -0.229 | -0.050 | 0.046 | -3.054 | -0.022 | 2.26E-03 | 18863 |
| 145 | Thal_PuM_L | -0.115 | -0.573 | 0.342  | 0.233 | -0.494 | -0.004 | 6.21E-01 | 18701 | -1.290 | -2.144 | -0.435 | 0.436 | -2.959 | -0.022 | 3.09E-03 | 18863 |
| 146 | Thal_PuM_R | -0.083 | -0.653 | 0.487  | 0.291 | -0.285 | -0.002 | 7.76E-01 | 18701 | -1.362 | -2.427 | -0.297 | 0.543 | -2.508 | -0.018 | 1.22E-02 | 18863 |
| 147 | Thal_PuL_L | -0.020 | -0.104 | 0.063  | 0.043 | -0.472 | -0.003 | 6.37E-01 | 18701 | -0.244 | -0.400 | -0.088 | 0.080 | -3.070 | -0.022 | 2.14E-03 | 18863 |
| 148 | Thal_PuL_R | -0.020 | -0.153 | 0.113  | 0.068 | -0.299 | -0.002 | 7.65E-01 | 18701 | -0.333 | -0.581 | -0.085 | 0.127 | -2.633 | -0.019 | 8.46E-03 | 18863 |
| 149 | Thal_PuL_L | -0.002 | -0.025 | 0.020  | 0.012 | -0.209 | -0.002 | 8.34E-01 | 18701 | -0.054 | -0.097 | -0.012 | 0.022 | -2.515 | -0.018 | 1.19E-02 | 18863 |
| 150 | Thal_PuL_R | 0.003  | -0.027 | 0.033  | 0.015 | 0.182  | 0.001  | 8.55E-01 | 18701 | -0.059 | -0.116 | -0.003 | 0.029 | -2.078 | -0.015 | 3.78E-02 | 18863 |
| 151 | ACC_sub_L  | -0.436 | -0.697 | -0.174 | 0.133 | -3.265 | -0.024 | 1.10E-03 | 18701 | -0.275 | -0.764 | 0.214  | 0.250 | -1.103 | -0.008 | 2.70E-01 | 18863 |
| 152 | ACC_sub_R  | -0.337 | -0.581 | -0.093 | 0.125 | -2.704 | -0.020 | 6.87E-03 | 18701 | -0.386 | -0.843 | 0.071  | 0.233 | -1.654 | -0.012 | 9.80E-02 | 18863 |
| 153 | ACC_pre_L  | -0.986 | -1.657 | -0.315 | 0.343 | -2.879 | -0.021 | 4.00E-03 | 18701 | -0.866 | -2.120 | 0.388  | 0.640 | -1.353 | -0.010 | 1.76E-01 | 18863 |
| 154 | ACC_pre_R  | -0.814 | -1.460 | -0.168 | 0.330 | -2.468 | -0.018 | 1.36E-02 | 18701 | -1.058 | -2.266 | 0.150  | 0.616 | -1.716 | -0.012 | 8.61E-02 | 18863 |
| 155 | ACC_sup_L  | -0.382 | -1.112 | 0.348  | 0.372 | -1.026 | -0.008 | 3.05E-01 | 18701 | -1.739 | -3.102 | -0.377 | 0.695 | -2.502 | -0.018 | 1.24E-02 | 18863 |
| 156 | ACC_sup_R  | -0.776 | -1.532 | -0.021 | 0.385 | -2.015 | -0.015 | 4.39E-02 | 18701 | -1.746 | -3.158 | -0.335 | 0.720 | -2.426 | -0.018 | 1.53E-02 | 18863 |
| 157 | N_Acc_L    | -0.171 | -0.391 | 0.048  | 0.112 | -1.531 | -0.011 | 1.26E-01 | 18701 | -0.124 | -0.534 | 0.287  | 0.209 | -0.591 | -0.004 | 5.55E-01 | 18863 |
| 158 | N_Acc_R    | -0.070 | -0.260 | 0.120  | 0.097 | -0.720 | -0.005 | 4.72E-01 | 18701 | -0.161 | -0.516 | 0.194  | 0.181 | -0.888 | -0.006 | 3.75E-01 | 18863 |
| 159 | VTA_L      | 0.003  | -0.005 | 0.011  | 0.004 | 0.795  | 0.006  | 4.27E-01 | 18701 | -0.014 | -0.028 | 0.000  | 0.007 | -1.899 | -0.014 | 5.76E-02 | 18863 |
| 160 | VTA_R      | 0.001  | -0.006 | 0.008  | 0.004 | 0.379  | 0.003  | 7.05E-01 | 18701 | -0.014 | -0.027 | -0.001 | 0.007 | -2.156 | -0.016 | 3.11E-02 | 18863 |
| 161 | SN_pc_L    | -0.002 | -0.014 | 0.010  | 0.006 | -0.311 | -0.002 | 7.56E-01 | 18701 | -0.031 | -0.054 | -0.008 | 0.012 | -2.597 | -0.019 | 9.42E-03 | 18863 |
| 162 | SN_pc_R    | -0.004 | -0.021 | 0.012  | 0.008 | -0.514 | -0.004 | 6.07E-01 | 18701 | -0.041 | -0.071 | -0.010 | 0.016 | -2.618 | -0.019 | 8.86E-03 | 18863 |
| 163 | SN_pr_L    | -0.006 | -0.023 | 0.011  | 0.009 | -0.703 | -0.005 | 4.82E-01 | 18701 | -0.063 | -0.094 | -0.031 | 0.016 | -3.907 | -0.028 | 9.38E-05 | 18863 |
| 164 | SN_pr_R    | -0.010 | -0.029 | 0.009  | 0.010 | -1.047 | -0.008 | 2.95E-01 | 18701 | -0.043 | -0.078 | -0.008 | 0.018 | -2.390 | -0.017 | 1.69E-02 | 18863 |
| 165 | Red_N_L    | 0.013  | -0.008 | 0.034  | 0.011 | 1.249  | 0.009  | 2.12E-01 | 18701 | -0.064 | -0.103 | -0.025 | 0.020 | -3.225 | -0.023 | 1.26E-03 | 18863 |
| 166 | Red_N_R    | 0.010  | -0.013 | 0.033  | 0.012 | 0.877  | 0.006  | 3.81E-01 | 18701 | -0.046 | -0.088 | -0.004 | 0.022 | -2.131 | -0.016 | 3.31E-02 | 18863 |
| 167 | LC_L       | 0.005  | -0.003 | 0.013  | 0.004 | 1.288  | 0.009  | 1.98E-01 | 18701 | 0.018  | 0.003  | 0.032  | 0.007 | 2.409  | 0.018  | 1.60E-02 | 18863 |
| 168 | LC_R       | 0.002  | -0.006 | 0.011  | 0.004 | 0.539  | 0.004  | 5.90E-01 | 18701 | 0.020  | 0.005  | 0.036  | 0.008 | 2.523  | 0.018  | 1.16E-02 | 18863 |
| 169 | Raphe_D    | 0.007  | -0.023 | 0.037  | 0.015 | 0.439  | 0.003  | 6.61E-01 | 18701 | -0.052 | -0.109 | 0.004  | 0.029 | -1.823 | -0.013 | 6.84E-02 | 18863 |
| 170 | Raphe_M    | 0.004  | -0.005 | 0.013  | 0.005 | 0.822  | 0.006  | 4.11E-01 | 18701 | 0.005  | -0.012 | 0.022  | 0.009 | 0.529  | 0.004  | 5.97E-01 | 18863 |

| Fresh fruit intake |                 |        |         |         |        |        |        |          |       | Beef intake |          |          |        |        |        |          |       |
|--------------------|-----------------|--------|---------|---------|--------|--------|--------|----------|-------|-------------|----------|----------|--------|--------|--------|----------|-------|
| Number             | AAL 3 region    | beta   | 95%CI l | 95%CI h | se     | t      | r      | p        | df.e  | beta        | 95%CI l  | 95%CI h  | se     | t      | r      | p        | df.e  |
| 0                  | Total brain     | 42.218 | -56.901 | 141.337 | 50.569 | 0.835  | 0.006  | 4.04E-01 | 18761 | -407.572    | -568.427 | -246.716 | 82.065 | -4.966 | -0.036 | 6.88E-07 | 18856 |
| 1                  | Precentral_L    | -2.745 | -6.232  | 0.743   | 1.779  | -1.543 | -0.011 | 1.23E-01 | 18761 | -6.181      | -11.839  | -0.522   | 2.887  | -2.141 | -0.016 | 3.23E-02 | 18856 |
| 2                  | Precentral_R    | 1.270  | -1.926  | 4.465   | 1.630  | 0.779  | 0.006  | 4.36E-01 | 18761 | -7.285      | -12.467  | -2.102   | 2.644  | -2.755 | -0.020 | 5.88E-03 | 18856 |
| 3                  | Frontal_Sup_2_L | -0.491 | -4.173  | 3.191   | 1.878  | -0.261 | -0.002 | 7.94E-01 | 18761 | -11.394     | -17.368  | -5.419   | 3.048  | -3.738 | -0.027 | 1.86E-04 | 18856 |
| 4                  | Frontal_Sup_2_R | -1.654 | -5.713  | 2.405   | 2.071  | -0.799 | -0.006 | 4.25E-01 | 18761 | -11.441     | -18.026  | -4.855   | 3.360  | -3.405 | -0.025 | 6.63E-04 | 18856 |
| 5                  | Frontal_Mid_2_L | -2.649 | -6.516  | 1.217   | 1.973  | -1.343 | -0.010 | 1.79E-01 | 18761 | -9.554      | -15.830  | -3.278   | 3.202  | -2.984 | -0.022 | 2.85E-03 | 18856 |
| 6                  | Frontal_Mid_2_R | -2.000 | -6.374  | 2.374   | 2.231  | -0.896 | -0.007 | 3.70E-01 | 18761 | -15.496     | -22.595  | -8.396   | 3.622  | -4.278 | -0.031 | 1.89E-05 | 18856 |



|    |                      |        |        |        |       |        |        |          |       |         |         |        |       |        |        |          |       |
|----|----------------------|--------|--------|--------|-------|--------|--------|----------|-------|---------|---------|--------|-------|--------|--------|----------|-------|
| 7  | Frontal_Inf_Oper_L   | -0.304 | -1.446 | 0.838  | 0.583 | -0.521 | -0.004 | 6.02E-01 | 18761 | -3.815  | -5.668  | -1.963 | 0.945 | -4.036 | -0.029 | 5.45E-05 | 18856 |
| 8  | Frontal_Inf_Oper_R   | 0.026  | -1.406 | 1.459  | 0.731 | 0.036  | 0.000  | 9.71E-01 | 18761 | -4.641  | -6.966  | -2.316 | 1.186 | -3.913 | -0.028 | 9.16E-05 | 18856 |
| 9  | Frontal_Inf_Tri_L    | -1.259 | -3.682 | 1.165  | 1.236 | -1.018 | -0.007 | 3.09E-01 | 18761 | -7.721  | -11.657 | -3.786 | 2.008 | -3.846 | -0.028 | 1.21E-04 | 18856 |
| 10 | Frontal_Inf_Tri_R    | -0.679 | -2.583 | 1.226  | 0.972 | -0.698 | -0.005 | 4.85E-01 | 18761 | -6.761  | -9.852  | -3.670 | 1.577 | -4.287 | -0.031 | 1.82E-05 | 18856 |
| 11 | Frontal_Inf_Orb_2_L  | -0.578 | -1.303 | 0.146  | 0.370 | -1.565 | -0.011 | 1.18E-01 | 18761 | -1.697  | -2.875  | -0.520 | 0.601 | -2.826 | -0.021 | 4.71E-03 | 18856 |
| 12 | Frontal_Inf_Orb_2_R  | 0.058  | -0.700 | 0.816  | 0.387 | 0.150  | 0.001  | 8.81E-01 | 18761 | -3.131  | -4.362  | -1.901 | 0.628 | -4.990 | -0.036 | 6.11E-07 | 18856 |
| 13 | Rolandic_Oper_L      | -1.010 | -2.107 | 0.087  | 0.560 | -1.805 | -0.013 | 7.10E-02 | 18761 | -1.776  | -3.556  | 0.004  | 0.908 | -1.956 | -0.014 | 5.05E-02 | 18856 |
| 14 | Rolandic_Oper_R      | 0.875  | -0.694 | 2.444  | 0.800 | 1.093  | 0.008  | 2.74E-01 | 18761 | -4.872  | -7.419  | -2.326 | 1.299 | -3.750 | -0.027 | 1.77E-04 | 18856 |
| 15 | Supp_Motor_Area_L    | 2.361  | -0.248 | 4.971  | 1.331 | 1.774  | 0.013  | 7.61E-02 | 18761 | -4.031  | -8.265  | 0.203  | 2.160 | -1.866 | -0.014 | 6.21E-02 | 18856 |
| 16 | Supp_Motor_Area_R    | 2.291  | -0.591 | 5.173  | 1.470 | 1.558  | 0.011  | 1.19E-01 | 18761 | -4.625  | -9.303  | 0.053  | 2.387 | -1.938 | -0.014 | 5.27E-02 | 18856 |
| 17 | Olfactory_L          | 0.016  | -0.372 | 0.403  | 0.198 | 0.079  | 0.001  | 9.37E-01 | 18761 | -0.438  | -1.067  | 0.191  | 0.321 | -1.364 | -0.010 | 1.73E-01 | 18856 |
| 18 | Olfactory_R          | -0.095 | -0.484 | 0.293  | 0.198 | -0.481 | -0.004 | 6.31E-01 | 18761 | -0.609  | -1.240  | 0.022  | 0.322 | -1.893 | -0.014 | 5.84E-02 | 18856 |
| 19 | Frontal_Sup_Medial_L | 2.054  | -0.392 | 4.499  | 1.248 | 1.646  | 0.012  | 9.97E-02 | 18761 | -10.061 | -14.028 | -6.094 | 2.024 | -4.971 | -0.036 | 6.71E-07 | 18856 |
| 20 | Frontal_Sup_Medial_R | 0.700  | -1.080 | 2.480  | 0.908 | 0.771  | 0.006  | 4.41E-01 | 18761 | -7.573  | -10.459 | -4.687 | 1.472 | -5.144 | -0.037 | 2.72E-07 | 18856 |
| 21 | Frontal_Med_Orb_L    | 0.403  | -0.510 | 1.316  | 0.466 | 0.865  | 0.006  | 3.87E-01 | 18761 | -3.296  | -4.778  | -1.814 | 0.756 | -4.359 | -0.032 | 1.32E-05 | 18856 |
| 22 | Frontal_Med_Orb_R    | 0.604  | -0.517 | 1.726  | 0.572 | 1.056  | 0.008  | 2.91E-01 | 18761 | -3.424  | -5.245  | -1.602 | 0.929 | -3.684 | -0.027 | 2.30E-04 | 18856 |
| 23 | Rectus_L             | 0.407  | -0.538 | 1.351  | 0.482 | 0.844  | 0.006  | 3.98E-01 | 18761 | -2.600  | -4.135  | -1.066 | 0.783 | -3.322 | -0.024 | 8.96E-04 | 18856 |
| 24 | Rectus_R             | 0.314  | -0.559 | 1.188  | 0.446 | 0.705  | 0.005  | 4.81E-01 | 18761 | -2.286  | -3.705  | -0.866 | 0.724 | -3.156 | -0.023 | 1.60E-03 | 18856 |
| 25 | OFCmed_L             | -0.100 | -0.647 | 0.448  | 0.279 | -0.356 | -0.003 | 7.21E-01 | 18761 | -1.606  | -2.496  | -0.717 | 0.454 | -3.540 | -0.026 | 4.01E-04 | 18856 |
| 26 | OFCmed_R             | -0.397 | -1.035 | 0.241  | 0.325 | -1.219 | -0.009 | 2.23E-01 | 18761 | -2.051  | -3.087  | -1.015 | 0.529 | -3.880 | -0.028 | 1.05E-04 | 18856 |
| 27 | OFCant_L             | -0.407 | -1.040 | 0.226  | 0.323 | -1.261 | -0.009 | 2.07E-01 | 18761 | -1.402  | -2.431  | -0.374 | 0.525 | -2.673 | -0.019 | 7.53E-03 | 18856 |
| 28 | OFCant_R             | -1.019 | -1.855 | -0.183 | 0.426 | -2.390 | -0.017 | 1.69E-02 | 18761 | -3.000  | -4.358  | -1.642 | 0.693 | -4.331 | -0.032 | 1.49E-05 | 18856 |
| 29 | OFCpost_L            | -0.367 | -1.159 | 0.425  | 0.404 | -0.909 | -0.007 | 3.63E-01 | 18761 | -1.756  | -3.043  | -0.469 | 0.657 | -2.674 | -0.019 | 7.51E-03 | 18856 |
| 30 | OFCpost_R            | -0.441 | -1.174 | 0.291  | 0.374 | -1.181 | -0.009 | 2.38E-01 | 18761 | -2.763  | -3.952  | -1.573 | 0.607 | -4.552 | -0.033 | 5.35E-06 | 18856 |
| 31 | OFClat_L             | -0.331 | -0.598 | -0.063 | 0.136 | -2.423 | -0.018 | 1.54E-02 | 18761 | -0.881  | -1.315  | -0.446 | 0.222 | -3.975 | -0.029 | 7.07E-05 | 18856 |
| 32 | OFClat_R             | -0.099 | -0.325 | 0.127  | 0.115 | -0.858 | -0.006 | 3.91E-01 | 18761 | -0.952  | -1.319  | -0.585 | 0.187 | -5.088 | -0.037 | 3.66E-07 | 18856 |
| 33 | Insula_L             | -0.923 | -3.374 | 1.527  | 1.250 | -0.739 | -0.005 | 4.60E-01 | 18761 | -6.409  | -10.389 | -2.429 | 2.031 | -3.156 | -0.023 | 1.60E-03 | 18856 |
| 34 | Insula_R             | -0.018 | -2.407 | 2.371  | 1.219 | -0.015 | 0.000  | 9.88E-01 | 18761 | -8.656  | -12.534 | -4.778 | 1.978 | -4.375 | -0.032 | 1.22E-05 | 18856 |
| 37 | Cingulate_Mid_L      | 2.808  | 0.734  | 4.883  | 1.058 | 2.653  | 0.019  | 7.98E-03 | 18761 | -9.609  | -12.976 | -6.242 | 1.718 | -5.594 | -0.041 | 2.25E-08 | 18856 |
| 38 | Cingulate_Mid_R      | 2.694  | 0.483  | 4.904  | 1.128 | 2.388  | 0.017  | 1.69E-02 | 18761 | -9.352  | -12.941 | -5.763 | 1.831 | -5.107 | -0.037 | 3.30E-07 | 18856 |
| 39 | Cingulate_Post_L     | -0.228 | -0.861 | 0.406  | 0.323 | -0.704 | -0.005 | 4.81E-01 | 18761 | -2.095  | -3.122  | -1.067 | 0.524 | -3.995 | -0.029 | 6.48E-05 | 18856 |
| 40 | Cingulate_Post_R     | -0.253 | -0.604 | 0.098  | 0.179 | -1.412 | -0.010 | 1.58E-01 | 18761 | -0.866  | -1.436  | -0.296 | 0.291 | -2.979 | -0.022 | 2.90E-03 | 18856 |
| 41 | Hippocampus_L        | 0.457  | -0.567 | 1.481  | 0.522 | 0.875  | 0.006  | 3.82E-01 | 18761 | -2.394  | -4.057  | -0.731 | 0.848 | -2.822 | -0.021 | 4.77E-03 | 18856 |
| 42 | Hippocampus_R        | 0.948  | -0.114 | 2.011  | 0.542 | 1.749  | 0.013  | 8.03E-02 | 18761 | -2.584  | -4.309  | -0.859 | 0.880 | -2.937 | -0.021 | 3.32E-03 | 18856 |
| 43 | ParaHippocampa_L     | 0.964  | 0.054  | 1.874  | 0.464 | 2.077  | 0.015  | 3.78E-02 | 18761 | -1.806  | -3.284  | -0.329 | 0.754 | -2.396 | -0.017 | 1.66E-02 | 18856 |
| 44 | ParaHippocampa_R     | 0.723  | -0.426 | 1.871  | 0.586 | 1.234  | 0.009  | 2.17E-01 | 18761 | -3.132  | -4.997  | -1.267 | 0.952 | -3.291 | -0.024 | 1.00E-03 | 18856 |
| 45 | Amygdala_L           | 0.157  | -0.196 | 0.511  | 0.180 | 0.873  | 0.006  | 3.83E-01 | 18761 | -0.299  | -0.873  | 0.275  | 0.293 | -1.020 | -0.007 | 3.08E-01 | 18856 |
| 46 | Amygdala_R           | 0.124  | -0.238 | 0.485  | 0.184 | 0.671  | 0.005  | 5.02E-01 | 18761 | -0.993  | -1.580  | -0.406 | 0.300 | -3.314 | -0.024 | 9.20E-04 | 18856 |
| 47 | Calcarine_L          | -0.393 | -3.768 | 2.982  | 1.722 | -0.228 | -0.002 | 8.19E-01 | 18761 | 2.151   | -3.326  | 7.629  | 2.795 | 0.770  | 0.006  | 4.41E-01 | 18856 |
| 48 | Calcarine_R          | 0.464  | -2.355 | 3.283  | 1.438 | 0.322  | 0.002  | 7.47E-01 | 18761 | 0.459   | -4.117  | 5.035  | 2.335 | 0.197  | 0.001  | 8.44E-01 | 18856 |
| 49 | Cuneus_L             | 2.166  | 0.047  | 4.285  | 1.081 | 2.003  | 0.015  | 4.51E-02 | 18761 | -1.425  | -4.864  | 2.014  | 1.754 | -0.812 | -0.006 | 4.17E-01 | 18856 |
| 50 | Cuneus_R             | 0.248  | -1.372 | 1.867  | 0.826 | 0.300  | 0.002  | 7.64E-01 | 18761 | -2.176  | -4.806  | 0.453  | 1.342 | -1.622 | -0.012 | 1.05E-01 | 18856 |
| 51 | Lingual_L            | 0.223  | -1.808 | 2.255  | 1.036 | 0.216  | 0.002  | 8.29E-01 | 18761 | -1.359  | -4.657  | 1.939  | 1.682 | -0.808 | -0.006 | 4.19E-01 | 18856 |
| 52 | Lingual_R            | -0.044 | -2.171 | 2.082  | 1.085 | -0.041 | 0.000  | 9.67E-01 | 18761 | -1.615  | -5.068  | 1.838  | 1.761 | -0.917 | -0.007 | 3.59E-01 | 18856 |
| 53 | Occipital_Sup_L      | 1.100  | -0.296 | 2.496  | 0.712 | 1.544  | 0.011  | 1.23E-01 | 18761 | -4.431  | -6.698  | -2.165 | 1.156 | -3.833 | -0.028 | 1.27E-04 | 18856 |
| 54 | Occipital_Sup_R      | 0.128  | -1.385 | 1.642  | 0.772 | 0.166  | 0.001  | 8.68E-01 | 18761 | -5.038  | -7.494  | -2.583 | 1.253 | -4.022 | -0.029 | 5.79E-05 | 18856 |
| 55 | Occipital_Mid_L      | -1.382 | -4.651 | 1.888  | 1.668 | -0.828 | -0.006 | 4.08E-01 | 18761 | -7.707  | -13.016 | -2.398 | 2.709 | -2.845 | -0.021 | 4.44E-03 | 18856 |
| 56 | Occipital_Mid_R      | -1.104 | -3.381 | 1.173  | 1.162 | -0.950 | -0.007 | 3.42E-01 | 18761 | -4.212  | -7.908  | -0.515 | 1.886 | -2.233 | -0.016 | 2.55E-02 | 18856 |
| 57 | Occipital_Inf_L      | -1.338 | -2.423 | -0.253 | 0.554 | -2.417 | -0.018 | 1.57E-02 | 18761 | 0.191   | -1.571  | 1.953  | 0.899 | 0.212  | 0.002  | 8.32E-01 | 18856 |

|     |                      |        |        |        |       |        |        |          |       |         |         |        |       |        |        |          |       |
|-----|----------------------|--------|--------|--------|-------|--------|--------|----------|-------|---------|---------|--------|-------|--------|--------|----------|-------|
| 58  | Occipita_Inf_R       | -1.723 | -2.977 | -0.468 | 0.640 | -2.692 | -0.020 | 7.11E-03 | 18761 | 1.607   | -0.429  | 3.643  | 1.039 | 1.547  | 0.011  | 1.22E-01 | 18856 |
| 59  | Fusiform_L           | 2.234  | -0.142 | 4.610  | 1.212 | 1.843  | 0.013  | 6.54E-02 | 18761 | -0.237  | -4.095  | 3.622  | 1.969 | -0.120 | -0.001 | 9.04E-01 | 18856 |
| 60  | Fusiform_R           | 3.952  | 1.342  | 6.562  | 1.331 | 2.968  | 0.022  | 3.00E-03 | 18761 | -1.846  | -6.086  | 2.394  | 2.163 | -0.853 | -0.006 | 3.93E-01 | 18856 |
| 61  | Postcentral_L        | 7.208  | 3.633  | 10.783 | 1.824 | 3.952  | 0.029  | 7.79E-05 | 18761 | -9.644  | -15.448 | -3.840 | 2.961 | -3.257 | -0.024 | 1.13E-03 | 18856 |
| 62  | Postcentral_R        | 8.965  | 5.304  | 12.625 | 1.867 | 4.800  | 0.035  | 1.60E-06 | 18761 | -6.775  | -12.720 | -0.831 | 3.033 | -2.234 | -0.016 | 2.55E-02 | 18856 |
| 63  | Parietal_Sup_L       | -0.076 | -2.136 | 1.985  | 1.051 | -0.072 | -0.001 | 9.43E-01 | 18761 | -4.883  | -8.227  | -1.539 | 1.706 | -2.862 | -0.021 | 4.21E-03 | 18856 |
| 64  | Parietal_Sup_R       | 0.368  | -1.460 | 2.196  | 0.933 | 0.394  | 0.003  | 6.93E-01 | 18761 | -4.280  | -7.245  | -1.315 | 1.513 | -2.829 | -0.021 | 4.67E-03 | 18856 |
| 65  | Parietal_Inf_L       | 3.275  | 0.577  | 5.972  | 1.376 | 2.379  | 0.017  | 1.74E-02 | 18761 | -7.799  | -12.176 | -3.422 | 2.233 | -3.493 | -0.025 | 4.80E-04 | 18856 |
| 66  | Parietal_Inf_R       | 2.516  | 0.767  | 4.264  | 0.892 | 2.820  | 0.021  | 4.80E-03 | 18761 | -3.930  | -6.768  | -1.092 | 1.448 | -2.714 | -0.020 | 6.65E-03 | 18856 |
| 67  | SupraMarginal_L      | 1.141  | -0.440 | 2.721  | 0.806 | 1.414  | 0.010  | 1.57E-01 | 18761 | -5.167  | -7.733  | -2.602 | 1.309 | -3.948 | -0.029 | 7.91E-05 | 18856 |
| 68  | SupraMarginal_R      | 4.377  | 2.140  | 6.614  | 1.141 | 3.835  | 0.028  | 1.26E-04 | 18761 | -8.565  | -12.196 | -4.934 | 1.853 | -4.623 | -0.034 | 3.81E-06 | 18856 |
| 69  | Angular_L            | 0.781  | -0.772 | 2.335  | 0.793 | 0.986  | 0.007  | 3.24E-01 | 18761 | -2.671  | -5.192  | -0.150 | 1.286 | -2.077 | -0.015 | 3.78E-02 | 18856 |
| 70  | Angular_R            | 0.269  | -1.813 | 2.351  | 1.062 | 0.253  | 0.002  | 8.00E-01 | 18761 | -5.009  | -8.387  | -1.630 | 1.724 | -2.906 | -0.021 | 3.66E-03 | 18856 |
| 71  | Precuneus_L          | 3.631  | -0.155 | 7.416  | 1.931 | 1.880  | 0.014  | 6.01E-02 | 18761 | -8.376  | -14.520 | -2.231 | 3.135 | -2.672 | -0.019 | 7.55E-03 | 18856 |
| 72  | Precuneus_R          | 0.911  | -2.462 | 4.283  | 1.721 | 0.529  | 0.004  | 5.97E-01 | 18761 | -7.606  | -13.078 | -2.134 | 2.792 | -2.724 | -0.020 | 6.45E-03 | 18856 |
| 73  | Paracentral_Lobule_L | 1.791  | 0.058  | 3.525  | 0.884 | 2.025  | 0.015  | 4.29E-02 | 18761 | -1.759  | -4.573  | 1.055  | 1.435 | -1.225 | -0.009 | 2.20E-01 | 18856 |
| 74  | Paracentral_Lobule_R | 0.922  | -0.320 | 2.163  | 0.633 | 1.455  | 0.011  | 1.46E-01 | 18761 | -1.284  | -3.299  | 0.731  | 1.028 | -1.249 | -0.009 | 2.12E-01 | 18856 |
| 75  | Caudate_L            | -0.096 | -1.480 | 1.288  | 0.706 | -0.136 | -0.001 | 8.92E-01 | 18761 | -4.080  | -6.327  | -1.833 | 1.146 | -3.559 | -0.026 | 3.73E-04 | 18856 |
| 76  | Caudate_R            | -0.779 | -2.347 | 0.789  | 0.800 | -0.974 | -0.007 | 3.30E-01 | 18761 | -4.098  | -6.644  | -1.552 | 1.299 | -3.155 | -0.023 | 1.61E-03 | 18856 |
| 77  | Putamen_L            | -1.411 | -3.512 | 0.689  | 1.072 | -1.317 | -0.010 | 1.88E-01 | 18761 | -5.773  | -9.185  | -2.362 | 1.740 | -3.317 | -0.024 | 9.12E-04 | 18856 |
| 78  | Putamen_R            | -0.937 | -3.078 | 1.203  | 1.092 | -0.858 | -0.006 | 3.91E-01 | 18761 | -6.129  | -9.603  | -2.654 | 1.773 | -3.457 | -0.025 | 5.47E-04 | 18856 |
| 79  | Pallidum_L           | -0.060 | -0.247 | 0.127  | 0.095 | -0.627 | -0.005 | 5.31E-01 | 18761 | -0.573  | -0.876  | -0.269 | 0.155 | -3.701 | -0.027 | 2.15E-04 | 18856 |
| 80  | Pallidum_R           | -0.042 | -0.248 | 0.163  | 0.105 | -0.406 | -0.003 | 6.85E-01 | 18761 | -0.662  | -0.995  | -0.329 | 0.170 | -3.900 | -0.028 | 9.65E-05 | 18856 |
| 83  | Heschl_L             | -0.337 | -0.716 | 0.042  | 0.193 | -1.743 | -0.013 | 8.14E-02 | 18761 | -0.989  | -1.603  | -0.374 | 0.314 | -3.151 | -0.023 | 1.63E-03 | 18856 |
| 84  | Heschl_R             | 0.138  | -0.286 | 0.561  | 0.216 | 0.636  | 0.005  | 5.24E-01 | 18761 | -1.525  | -2.212  | -0.838 | 0.350 | -4.353 | -0.032 | 1.35E-05 | 18856 |
| 85  | Temporal_Sup_L       | -0.925 | -3.658 | 1.808  | 1.395 | -0.663 | -0.005 | 5.07E-01 | 18761 | -9.173  | -13.610 | -4.737 | 2.263 | -4.053 | -0.030 | 5.08E-05 | 18856 |
| 86  | Temporal_Sup_R       | 2.609  | -0.417 | 5.634  | 1.544 | 1.690  | 0.012  | 9.10E-02 | 18761 | -12.809 | -17.719 | -7.898 | 2.505 | -5.113 | -0.037 | 3.21E-07 | 18856 |
| 87  | Temporal_Pole_Sup_L  | -0.421 | -1.716 | 0.875  | 0.661 | -0.637 | -0.005 | 5.24E-01 | 18761 | -2.765  | -4.868  | -0.662 | 1.073 | -2.577 | -0.019 | 9.97E-03 | 18856 |
| 88  | Temporal_Pole_Sup_R  | 0.269  | -1.094 | 1.632  | 0.695 | 0.386  | 0.003  | 6.99E-01 | 18761 | -4.218  | -6.431  | -2.004 | 1.129 | -3.735 | -0.027 | 1.88E-04 | 18856 |
| 89  | Temporal_Mid_L       | 1.329  | -3.228 | 5.886  | 2.325 | 0.572  | 0.004  | 5.68E-01 | 18761 | -16.029 | -23.430 | -8.629 | 3.776 | -4.246 | -0.031 | 2.19E-05 | 18856 |
| 90  | Temporal_Mid_R       | -0.150 | -4.196 | 3.896  | 2.064 | -0.073 | -0.001 | 9.42E-01 | 18761 | -7.848  | -14.420 | -1.275 | 3.353 | -2.340 | -0.017 | 1.93E-02 | 18856 |
| 91  | Temporal_Pole_Mid_L  | 0.226  | -0.863 | 1.315  | 0.556 | 0.406  | 0.003  | 6.84E-01 | 18761 | -0.400  | -2.169  | 1.368  | 0.902 | -0.444 | -0.003 | 6.57E-01 | 18856 |
| 92  | Temporal_Pole_Mid_R  | -0.037 | -1.358 | 1.284  | 0.674 | -0.054 | 0.000  | 9.57E-01 | 18761 | -2.436  | -4.584  | -0.289 | 1.096 | -2.223 | -0.016 | 2.62E-02 | 18856 |
| 93  | Temporal_Inf_L       | -0.697 | -3.828 | 2.434  | 1.597 | -0.436 | -0.003 | 6.63E-01 | 18761 | -3.309  | -8.398  | 1.781  | 2.597 | -1.274 | -0.009 | 2.03E-01 | 18856 |
| 94  | Temporal_Inf_R       | -1.095 | -4.509 | 2.319  | 1.742 | -0.629 | -0.005 | 5.29E-01 | 18761 | -3.706  | -9.254  | 1.843  | 2.831 | -1.309 | -0.010 | 1.91E-01 | 18856 |
| 95  | Cerebellum_Crus1_L   | 1.378  | -2.346 | 5.102  | 1.900 | 0.725  | 0.005  | 4.68E-01 | 18761 | 1.785   | -4.259  | 7.828  | 3.083 | 0.579  | 0.004  | 5.63E-01 | 18856 |
| 96  | Cerebellum_Crus1_R   | 0.290  | -3.507 | 4.086  | 1.937 | 0.150  | 0.001  | 8.81E-01 | 18761 | 0.817   | -5.345  | 6.979  | 3.144 | 0.260  | 0.002  | 7.95E-01 | 18856 |
| 97  | Cerebellum_Crus2_L   | -0.452 | -3.404 | 2.500  | 1.506 | -0.300 | -0.002 | 7.64E-01 | 18761 | -4.195  | -8.988  | 0.598  | 2.445 | -1.715 | -0.012 | 8.63E-02 | 18856 |
| 98  | Cerebellum_Crus2_R   | -0.528 | -3.254 | 2.199  | 1.391 | -0.379 | -0.003 | 7.04E-01 | 18761 | -2.572  | -7.003  | 1.859  | 2.261 | -1.138 | -0.008 | 2.55E-01 | 18856 |
| 99  | Cerebellum_3_L       | 0.088  | -0.110 | 0.286  | 0.101 | 0.872  | 0.006  | 3.83E-01 | 18761 | 0.621   | 0.299   | 0.942  | 0.164 | 3.785  | 0.028  | 1.54E-04 | 18856 |
| 100 | Cerebellum_3_R       | 0.224  | -0.043 | 0.491  | 0.136 | 1.644  | 0.012  | 1.00E-01 | 18761 | 0.635   | 0.201   | 1.069  | 0.221 | 2.869  | 0.021  | 4.12E-03 | 18856 |
| 101 | Cerebellum_4_5_L     | 0.730  | -0.872 | 2.333  | 0.817 | 0.894  | 0.007  | 3.72E-01 | 18761 | 2.897   | 0.297   | 5.498  | 1.327 | 2.184  | 0.016  | 2.90E-02 | 18856 |
| 102 | Cerebellum_4_5_R     | 1.591  | 0.286  | 2.896  | 0.666 | 2.390  | 0.017  | 1.69E-02 | 18761 | 1.665   | -0.455  | 3.784  | 1.081 | 1.539  | 0.011  | 1.24E-01 | 18856 |
| 103 | Cerebellum_6_L       | 2.308  | -0.463 | 5.078  | 1.414 | 1.632  | 0.012  | 1.03E-01 | 18761 | 1.877   | -2.623  | 6.376  | 2.296 | 0.817  | 0.006  | 4.14E-01 | 18856 |
| 104 | Cerebellum_6_R       | 2.702  | -0.216 | 5.621  | 1.489 | 1.815  | 0.013  | 6.96E-02 | 18761 | 2.432   | -2.307  | 7.171  | 2.418 | 1.006  | 0.007  | 3.15E-01 | 18856 |
| 105 | Cerebellum_7b_L      | -0.032 | -0.934 | 0.870  | 0.460 | -0.069 | -0.001 | 9.45E-01 | 18761 | -1.139  | -2.604  | 0.326  | 0.748 | -1.524 | -0.011 | 1.28E-01 | 18856 |
| 106 | Cerebellum_7b_R      | 0.010  | -0.884 | 0.904  | 0.456 | 0.022  | 0.000  | 9.83E-01 | 18761 | -1.634  | -3.086  | -0.182 | 0.741 | -2.206 | -0.016 | 2.74E-02 | 18856 |
| 107 | Cerebellum_8_L       | -0.104 | -2.972 | 2.764  | 1.463 | -0.071 | -0.001 | 9.43E-01 | 18761 | 0.948   | -3.706  | 5.602  | 2.374 | 0.399  | 0.003  | 6.90E-01 | 18856 |
| 108 | Cerebellum_8_R       | -0.657 | -4.389 | 3.075  | 1.904 | -0.345 | -0.003 | 7.30E-01 | 18761 | -5.159  | -11.217 | 0.898  | 3.090 | -1.670 | -0.012 | 9.50E-02 | 18856 |

|     |                 |        |        |        |       |        |        |          |       |        |        |        |       |        |        |          |       |
|-----|-----------------|--------|--------|--------|-------|--------|--------|----------|-------|--------|--------|--------|-------|--------|--------|----------|-------|
| 109 | Cerebellum_9_L  | -1.258 | -2.879 | 0.364  | 0.827 | -1.521 | -0.011 | 1.28E-01 | 18761 | 2.222  | -0.408 | 4.852  | 1.342 | 1.656  | 0.012  | 9.77E-02 | 18856 |
| 110 | Cerebellum_9_R  | -1.656 | -3.250 | -0.061 | 0.813 | -2.035 | -0.015 | 4.18E-02 | 18761 | 2.330  | -0.256 | 4.915  | 1.319 | 1.766  | 0.013  | 7.74E-02 | 18856 |
| 111 | Cerebellum_10_L | -0.037 | -0.152 | 0.078  | 0.059 | -0.632 | -0.005 | 5.27E-01 | 18761 | 0.236  | 0.050  | 0.423  | 0.095 | 2.484  | 0.018  | 1.30E-02 | 18856 |
| 112 | Cerebellum_10_R | -0.006 | -0.126 | 0.113  | 0.061 | -0.102 | -0.001 | 9.19E-01 | 18761 | 0.238  | 0.044  | 0.432  | 0.099 | 2.405  | 0.018  | 1.62E-02 | 18856 |
| 113 | Vermis_1_2      | 0.004  | -0.071 | 0.079  | 0.038 | 0.108  | 0.001  | 9.14E-01 | 18761 | 0.154  | 0.033  | 0.275  | 0.062 | 2.494  | 0.018  | 1.27E-02 | 18856 |
| 114 | Vermis_3        | -0.005 | -0.302 | 0.292  | 0.151 | -0.034 | 0.000  | 9.73E-01 | 18761 | 0.410  | -0.072 | 0.892  | 0.246 | 1.668  | 0.012  | 9.53E-02 | 18856 |
| 115 | Vermis_4_5      | -0.055 | -0.928 | 0.817  | 0.445 | -0.124 | -0.001 | 9.01E-01 | 18761 | 0.905  | -0.511 | 2.322  | 0.723 | 1.253  | 0.009  | 2.10E-01 | 18856 |
| 116 | Vermis_6        | 0.081  | -0.404 | 0.567  | 0.248 | 0.329  | 0.002  | 7.42E-01 | 18761 | 0.855  | 0.066  | 1.644  | 0.402 | 2.125  | 0.015  | 3.36E-02 | 18856 |
| 117 | Vermis_7        | -0.043 | -0.317 | 0.232  | 0.140 | -0.303 | -0.002 | 7.62E-01 | 18761 | 0.223  | -0.223 | 0.669  | 0.228 | 0.978  | 0.007  | 3.28E-01 | 18856 |
| 118 | Vermis_8        | -0.078 | -0.529 | 0.374  | 0.230 | -0.337 | -0.002 | 7.36E-01 | 18761 | 0.535  | -0.198 | 1.268  | 0.374 | 1.430  | 0.010  | 1.53E-01 | 18856 |
| 119 | Vermis_9        | -0.070 | -0.437 | 0.296  | 0.187 | -0.376 | -0.003 | 7.07E-01 | 18761 | 0.568  | -0.027 | 1.162  | 0.303 | 1.872  | 0.014  | 6.12E-02 | 18856 |
| 120 | Vermis_10       | -0.057 | -0.159 | 0.045  | 0.052 | -1.101 | -0.008 | 2.71E-01 | 18761 | 0.313  | 0.147  | 0.478  | 0.084 | 3.704  | 0.027  | 2.13E-04 | 18856 |
| 121 | Thal_AV_L       | -0.001 | -0.041 | 0.040  | 0.021 | -0.025 | 0.000  | 9.80E-01 | 18761 | -0.112 | -0.178 | -0.046 | 0.034 | -3.315 | -0.024 | 9.18E-04 | 18856 |
| 122 | Thal_AV_R       | -0.029 | -0.087 | 0.029  | 0.030 | -0.974 | -0.007 | 3.30E-01 | 18761 | -0.141 | -0.236 | -0.047 | 0.048 | -2.923 | -0.021 | 3.47E-03 | 18856 |
| 123 | Thal_LP_L       | 0.000  | -0.046 | 0.045  | 0.023 | -0.016 | 0.000  | 9.87E-01 | 18761 | -0.161 | -0.235 | -0.088 | 0.037 | -4.307 | -0.031 | 1.67E-05 | 18856 |
| 124 | Thal_LP_R       | -0.032 | -0.091 | 0.027  | 0.030 | -1.058 | -0.008 | 2.90E-01 | 18761 | -0.211 | -0.306 | -0.115 | 0.049 | -4.314 | -0.031 | 1.61E-05 | 18856 |
| 125 | Thal_VA_L       | -0.007 | -0.055 | 0.041  | 0.025 | -0.285 | -0.002 | 7.76E-01 | 18761 | -0.057 | -0.136 | 0.021  | 0.040 | -1.434 | -0.010 | 1.52E-01 | 18856 |
| 126 | Thal_VA_R       | -0.020 | -0.079 | 0.040  | 0.030 | -0.651 | -0.005 | 5.15E-01 | 18761 | -0.050 | -0.146 | 0.047  | 0.049 | -1.010 | -0.007 | 3.13E-01 | 18856 |
| 127 | Thal_VL_L       | -0.060 | -0.197 | 0.077  | 0.070 | -0.855 | -0.006 | 3.92E-01 | 18761 | -0.411 | -0.634 | -0.188 | 0.114 | -3.611 | -0.026 | 3.06E-04 | 18856 |
| 128 | Thal_VL_R       | -0.137 | -0.320 | 0.045  | 0.093 | -1.477 | -0.011 | 1.40E-01 | 18761 | -0.619 | -0.915 | -0.323 | 0.151 | -4.097 | -0.030 | 4.21E-05 | 18856 |
| 129 | Thal_VPL_L      | -0.175 | -0.339 | -0.012 | 0.083 | -2.099 | -0.015 | 3.58E-02 | 18761 | -0.391 | -0.656 | -0.125 | 0.135 | -2.884 | -0.021 | 3.93E-03 | 18856 |
| 130 | Thal_VPL_R      | -0.135 | -0.307 | 0.037  | 0.088 | -1.541 | -0.011 | 1.23E-01 | 18761 | -0.563 | -0.842 | -0.284 | 0.142 | -3.954 | -0.029 | 7.73E-05 | 18856 |
| 131 | Thal_IL_L       | -0.040 | -0.110 | 0.031  | 0.036 | -1.100 | -0.008 | 2.72E-01 | 18761 | -0.334 | -0.449 | -0.219 | 0.059 | -5.694 | -0.041 | 1.26E-08 | 18856 |
| 132 | Thal_IL_R       | -0.034 | -0.114 | 0.047  | 0.041 | -0.824 | -0.006 | 4.10E-01 | 18761 | -0.364 | -0.494 | -0.233 | 0.066 | -5.468 | -0.040 | 4.60E-08 | 18856 |
| 133 | Thal_Re_L       | 0.000  | 0.000  | 0.000  | 0.000 | 0.014  | 0.000  | 9.89E-01 | 18761 | 0.000  | -0.001 | 0.000  | 0.000 | -0.777 | -0.006 | 4.37E-01 | 18856 |
| 134 | Thal_Re_R       | -0.001 | -0.003 | 0.002  | 0.001 | -0.514 | -0.004 | 6.07E-01 | 18761 | -0.004 | -0.008 | 0.000  | 0.002 | -2.191 | -0.016 | 2.85E-02 | 18856 |
| 135 | Thal_MDm_L      | -0.410 | -0.934 | 0.114  | 0.267 | -1.533 | -0.011 | 1.25E-01 | 18761 | -2.618 | -3.469 | -1.768 | 0.434 | -6.035 | -0.044 | 1.62E-09 | 18856 |
| 136 | Thal_MDm_R      | -0.413 | -1.022 | 0.196  | 0.311 | -1.329 | -0.010 | 1.84E-01 | 18761 | -2.698 | -3.687 | -1.710 | 0.504 | -5.350 | -0.039 | 8.88E-08 | 18856 |
| 137 | Thal_MDl_L      | -0.042 | -0.133 | 0.049  | 0.046 | -0.905 | -0.007 | 3.65E-01 | 18761 | -0.468 | -0.616 | -0.321 | 0.075 | -6.235 | -0.045 | 4.61E-10 | 18856 |
| 138 | Thal_MDl_R      | -0.051 | -0.154 | 0.052  | 0.053 | -0.971 | -0.007 | 3.31E-01 | 18761 | -0.484 | -0.652 | -0.317 | 0.085 | -5.672 | -0.041 | 1.43E-08 | 18856 |
| 139 | Thal_LGN_L      | 0.003  | -0.010 | 0.017  | 0.007 | 0.473  | 0.003  | 6.36E-01 | 18761 | -0.043 | -0.066 | -0.021 | 0.011 | -3.808 | -0.028 | 1.40E-04 | 18856 |
| 140 | Thal_LGN_R      | -0.013 | -0.043 | 0.016  | 0.015 | -0.900 | -0.007 | 3.68E-01 | 18761 | -0.123 | -0.171 | -0.075 | 0.024 | -5.069 | -0.037 | 4.05E-07 | 18856 |
| 141 | Thal_MGN_L      | -0.017 | -0.041 | 0.008  | 0.013 | -1.329 | -0.010 | 1.84E-01 | 18761 | -0.098 | -0.138 | -0.059 | 0.020 | -4.833 | -0.035 | 1.35E-06 | 18856 |
| 142 | Thal_MGN_R      | -0.013 | -0.040 | 0.014  | 0.014 | -0.953 | -0.007 | 3.41E-01 | 18761 | -0.121 | -0.165 | -0.078 | 0.022 | -5.476 | -0.040 | 4.40E-08 | 18856 |
| 143 | Thal_PuA_L      | -0.019 | -0.048 | 0.010  | 0.015 | -1.277 | -0.009 | 2.02E-01 | 18761 | -0.127 | -0.174 | -0.080 | 0.024 | -5.267 | -0.038 | 1.41E-07 | 18856 |
| 144 | Thal_PuA_R      | -0.020 | -0.080 | 0.040  | 0.031 | -0.649 | -0.005 | 5.16E-01 | 18761 | -0.274 | -0.372 | -0.176 | 0.050 | -5.472 | -0.040 | 4.52E-08 | 18856 |
| 145 | Thal_PuM_L      | -0.496 | -1.073 | 0.081  | 0.294 | -1.685 | -0.012 | 9.19E-02 | 18761 | -2.579 | -3.515 | -1.642 | 0.478 | -5.396 | -0.039 | 6.90E-08 | 18856 |
| 146 | Thal_PuM_R      | -0.314 | -1.034 | 0.405  | 0.367 | -0.857 | -0.006 | 3.92E-01 | 18761 | -3.056 | -4.224 | -1.889 | 0.595 | -5.133 | -0.037 | 2.88E-07 | 18856 |
| 147 | Thal_PuL_L      | -0.076 | -0.181 | 0.029  | 0.054 | -1.412 | -0.010 | 1.58E-01 | 18761 | -0.470 | -0.641 | -0.299 | 0.087 | -5.387 | -0.039 | 7.24E-08 | 18856 |
| 148 | Thal_PuL_R      | -0.084 | -0.251 | 0.083  | 0.085 | -0.983 | -0.007 | 3.26E-01 | 18761 | -0.708 | -0.980 | -0.436 | 0.139 | -5.106 | -0.037 | 3.33E-07 | 18856 |
| 149 | Thal_PuL_L      | -0.023 | -0.052 | 0.006  | 0.015 | -1.577 | -0.012 | 1.15E-01 | 18761 | -0.063 | -0.110 | -0.017 | 0.024 | -2.656 | -0.019 | 7.92E-03 | 18856 |
| 150 | Thal_PuL_R      | -0.020 | -0.058 | 0.018  | 0.019 | -1.034 | -0.008 | 3.01E-01 | 18761 | -0.094 | -0.155 | -0.032 | 0.031 | -2.990 | -0.022 | 2.80E-03 | 18856 |
| 151 | ACC_sub_L       | -0.057 | -0.387 | 0.274  | 0.169 | -0.336 | -0.002 | 7.37E-01 | 18761 | -0.351 | -0.887 | 0.186  | 0.274 | -1.282 | -0.009 | 2.00E-01 | 18856 |
| 152 | ACC_sub_R       | -0.159 | -0.467 | 0.149  | 0.157 | -1.011 | -0.007 | 3.12E-01 | 18761 | -0.253 | -0.754 | 0.248  | 0.256 | -0.991 | -0.007 | 3.22E-01 | 18856 |
| 153 | ACC_pre_L       | 0.052  | -0.795 | 0.898  | 0.432 | 0.119  | 0.001  | 9.05E-01 | 18761 | -2.618 | -3.992 | -1.244 | 0.701 | -3.734 | -0.027 | 1.89E-04 | 18856 |
| 154 | ACC_pre_R       | 0.190  | -0.625 | 1.005  | 0.416 | 0.457  | 0.003  | 6.48E-01 | 18761 | -2.197 | -3.521 | -0.873 | 0.676 | -3.252 | -0.024 | 1.15E-03 | 18856 |
| 155 | ACC_sup_L       | 0.097  | -0.823 | 1.018  | 0.469 | 0.208  | 0.002  | 8.36E-01 | 18761 | -2.133 | -3.627 | -0.638 | 0.762 | -2.797 | -0.020 | 5.16E-03 | 18856 |
| 156 | ACC_sup_R       | 0.255  | -0.697 | 1.207  | 0.486 | 0.525  | 0.004  | 6.00E-01 | 18761 | -1.823 | -3.371 | -0.275 | 0.790 | -2.309 | -0.017 | 2.10E-02 | 18856 |
| 157 | N_Acc_L         | -0.080 | -0.357 | 0.197  | 0.141 | -0.568 | -0.004 | 5.70E-01 | 18761 | -0.724 | -1.174 | -0.274 | 0.230 | -3.154 | -0.023 | 1.62E-03 | 18856 |

|     |         |        |        |       |       |        |        |          |       |        |        |        |       |        |        |          |       |
|-----|---------|--------|--------|-------|-------|--------|--------|----------|-------|--------|--------|--------|-------|--------|--------|----------|-------|
| 158 | N_Acc_R | -0.151 | -0.390 | 0.089 | 0.122 | -1.234 | -0.009 | 2.17E-01 | 18761 | -0.581 | -0.970 | -0.192 | 0.199 | -2.927 | -0.021 | 3.43E-03 | 18856 |
| 159 | VTA_L   | 0.004  | -0.006 | 0.013 | 0.005 | 0.720  | 0.005  | 4.72E-01 | 18761 | 0.003  | -0.013 | 0.019  | 0.008 | 0.350  | 0.003  | 7.26E-01 | 18856 |
| 160 | VTA_R   | 0.004  | -0.005 | 0.012 | 0.004 | 0.787  | 0.006  | 4.32E-01 | 18761 | 0.004  | -0.011 | 0.018  | 0.007 | 0.497  | 0.004  | 6.19E-01 | 18856 |
| 161 | SN_pc_L | 0.009  | -0.006 | 0.025 | 0.008 | 1.151  | 0.008  | 2.50E-01 | 18761 | -0.026 | -0.051 | -0.001 | 0.013 | -2.004 | -0.015 | 4.51E-02 | 18856 |
| 162 | SN_pc_R | 0.001  | -0.020 | 0.022 | 0.010 | 0.098  | 0.001  | 9.22E-01 | 18761 | -0.017 | -0.051 | 0.016  | 0.017 | -1.016 | -0.007 | 3.10E-01 | 18856 |
| 163 | SN_pr_L | -0.007 | -0.028 | 0.014 | 0.011 | -0.645 | -0.005 | 5.19E-01 | 18761 | -0.034 | -0.068 | 0.001  | 0.018 | -1.924 | -0.014 | 5.44E-02 | 18856 |
| 164 | SN_pr_R | -0.017 | -0.041 | 0.007 | 0.012 | -1.370 | -0.010 | 1.71E-01 | 18761 | -0.011 | -0.050 | 0.027  | 0.020 | -0.579 | -0.004 | 5.63E-01 | 18856 |
| 165 | Red_N_L | -0.002 | -0.028 | 0.025 | 0.013 | -0.119 | -0.001 | 9.05E-01 | 18761 | -0.035 | -0.077 | 0.008  | 0.022 | -1.597 | -0.012 | 1.10E-01 | 18856 |
| 166 | Red_N_R | -0.001 | -0.029 | 0.028 | 0.015 | -0.050 | 0.000  | 9.60E-01 | 18761 | -0.021 | -0.067 | 0.025  | 0.024 | -0.886 | -0.006 | 3.76E-01 | 18856 |
| 167 | LC_L    | 0.002  | -0.008 | 0.011 | 0.005 | 0.322  | 0.002  | 7.47E-01 | 18761 | 0.013  | -0.003 | 0.029  | 0.008 | 1.573  | 0.011  | 1.16E-01 | 18856 |
| 168 | LC_R    | -0.005 | -0.016 | 0.006 | 0.005 | -0.882 | -0.006 | 3.78E-01 | 18761 | 0.011  | -0.007 | 0.028  | 0.009 | 1.194  | 0.009  | 2.32E-01 | 18856 |
| 169 | Raphe_D | -0.010 | -0.048 | 0.027 | 0.019 | -0.541 | -0.004 | 5.88E-01 | 18761 | -0.082 | -0.144 | -0.021 | 0.031 | -2.620 | -0.019 | 8.79E-03 | 18856 |
| 170 | Raphe_M | 0.003  | -0.009 | 0.015 | 0.006 | 0.506  | 0.004  | 6.13E-01 | 18761 | 0.004  | -0.015 | 0.022  | 0.010 | 0.369  | 0.003  | 7.12E-01 | 18856 |

| Dried fruit intake |                      |         |         |         |        |       |       |          |       | Lamb/mutton intake |          |          |         |        |        |          |       |
|--------------------|----------------------|---------|---------|---------|--------|-------|-------|----------|-------|--------------------|----------|----------|---------|--------|--------|----------|-------|
| Number             | AAL 3 region         | beta    | 95%CI l | 95%CI h | se     | t     | r     | p        | df.e  | beta               | 95%CI l  | 95%CI h  | se      | t      | r      | p        | df.e  |
| 0                  | Total brain          | 276.978 | 165.541 | 388.414 | 56.853 | 4.872 | 0.036 | 1.11E-06 | 18645 | -549.726           | -748.243 | -351.210 | 101.279 | -5.428 | -0.040 | 5.78E-08 | 18828 |
| 1                  | Precentral_L         | 1.972   | -1.952  | 5.896   | 2.002  | 0.985 | 0.007 | 3.25E-01 | 18645 | -8.809             | -15.794  | -1.825   | 3.563   | -2.472 | -0.018 | 1.34E-02 | 18828 |
| 2                  | Precentral_R         | 5.141   | 1.550   | 8.732   | 1.832  | 2.806 | 0.021 | 5.02E-03 | 18645 | -9.676             | -16.071  | -3.280   | 3.263   | -2.965 | -0.022 | 3.03E-03 | 18828 |
| 3                  | Frontal_Sup_2_L      | 7.493   | 3.356   | 11.630  | 2.111  | 3.550 | 0.026 | 3.86E-04 | 18645 | -12.695            | -20.070  | -5.319   | 3.763   | -3.374 | -0.025 | 7.43E-04 | 18828 |
| 4                  | Frontal_Sup_2_R      | 8.129   | 3.567   | 12.690  | 2.327  | 3.493 | 0.026 | 4.79E-04 | 18645 | -13.297            | -21.427  | -5.166   | 4.148   | -3.206 | -0.023 | 1.35E-03 | 18828 |
| 5                  | Frontal_Mid_2_L      | 7.795   | 3.449   | 12.141  | 2.217  | 3.516 | 0.026 | 4.39E-04 | 18645 | -11.307            | -19.051  | -3.562   | 3.951   | -2.862 | -0.021 | 4.22E-03 | 18828 |
| 6                  | Frontal_Mid_2_R      | 9.854   | 4.938   | 14.771  | 2.508  | 3.929 | 0.029 | 8.57E-05 | 18645 | -17.799            | -26.561  | -9.037   | 4.470   | -3.982 | -0.029 | 6.87E-05 | 18828 |
| 7                  | Frontal_Inf_Oper_L   | 2.707   | 1.423   | 3.991   | 0.655  | 4.133 | 0.030 | 3.59E-05 | 18645 | -3.811             | -6.099   | -1.524   | 1.167   | -3.266 | -0.024 | 1.09E-03 | 18828 |
| 8                  | Frontal_Inf_Oper_R   | 2.556   | 0.946   | 4.166   | 0.821  | 3.112 | 0.023 | 1.86E-03 | 18645 | -5.472             | -8.342   | -2.602   | 1.464   | -3.738 | -0.027 | 1.86E-04 | 18828 |
| 9                  | Frontal_Inf_Tri_L    | 5.978   | 3.253   | 8.703   | 1.390  | 4.300 | 0.031 | 1.71E-05 | 18645 | -4.433             | -9.292   | 0.426    | 2.479   | -1.788 | -0.013 | 7.37E-02 | 18828 |
| 10                 | Frontal_Inf_Tri_R    | 3.724   | 1.585   | 5.863   | 1.091  | 3.413 | 0.025 | 6.45E-04 | 18645 | -5.815             | -9.632   | -1.998   | 1.947   | -2.986 | -0.022 | 2.83E-03 | 18828 |
| 11                 | Frontal_Inf_Orb_2_L  | 1.440   | 0.625   | 2.254   | 0.416  | 3.463 | 0.025 | 5.36E-04 | 18645 | -0.610             | -2.063   | 0.844    | 0.741   | -0.822 | -0.006 | 4.11E-01 | 18828 |
| 12                 | Frontal_Inf_Orb_2_R  | 1.613   | 0.762   | 2.465   | 0.434  | 3.713 | 0.027 | 2.05E-04 | 18645 | -1.833             | -3.352   | -0.314   | 0.775   | -2.365 | -0.017 | 1.81E-02 | 18828 |
| 13                 | Rolandic_Oper_L      | 0.654   | -0.579  | 1.886   | 0.629  | 1.039 | 0.008 | 2.99E-01 | 18645 | -2.290             | -4.487   | -0.093   | 1.121   | -2.043 | -0.015 | 4.11E-02 | 18828 |
| 14                 | Rolandic_Oper_R      | 1.311   | -0.453  | 3.075   | 0.900  | 1.457 | 0.011 | 1.45E-01 | 18645 | -4.906             | -8.050   | -1.762   | 1.604   | -3.059 | -0.022 | 2.23E-03 | 18828 |
| 15                 | Supp_Motor_Area_L    | 0.640   | -2.293  | 3.572   | 1.496  | 0.428 | 0.003 | 6.69E-01 | 18645 | -6.394             | -11.619  | -1.169   | 2.666   | -2.399 | -0.017 | 1.65E-02 | 18828 |
| 16                 | Supp_Motor_Area_R    | 1.488   | -1.750  | 4.726   | 1.652  | 0.901 | 0.007 | 3.68E-01 | 18645 | -6.634             | -12.408  | -0.860   | 2.946   | -2.252 | -0.016 | 2.43E-02 | 18828 |
| 17                 | Olfactory_L          | 0.407   | -0.028  | 0.843   | 0.222  | 1.833 | 0.013 | 6.68E-02 | 18645 | -0.194             | -0.971   | 0.582    | 0.396   | -0.490 | -0.004 | 6.24E-01 | 18828 |
| 18                 | Olfactory_R          | 0.387   | -0.050  | 0.824   | 0.223  | 1.737 | 0.013 | 8.24E-02 | 18645 | -0.711             | -1.489   | 0.068    | 0.397   | -1.789 | -0.013 | 7.37E-02 | 18828 |
| 19                 | Frontal_Sup_Medial_L | 6.944   | 4.197   | 9.691   | 1.402  | 4.955 | 0.036 | 7.31E-07 | 18645 | -11.561            | -16.458  | -6.665   | 2.498   | -4.628 | -0.034 | 3.71E-06 | 18828 |
| 20                 | Frontal_Sup_Medial_R | 4.755   | 2.756   | 6.754   | 1.020  | 4.662 | 0.034 | 3.16E-06 | 18645 | -6.422             | -9.986   | -2.859   | 1.818   | -3.533 | -0.026 | 4.12E-04 | 18828 |
| 21                 | Frontal_Med_Orb_L    | 2.098   | 1.071   | 3.125   | 0.524  | 4.005 | 0.029 | 6.23E-05 | 18645 | -3.104             | -4.935   | -1.274   | 0.934   | -3.325 | -0.024 | 8.87E-04 | 18828 |
| 22                 | Frontal_Med_Orb_R    | 2.579   | 1.317   | 3.842   | 0.644  | 4.005 | 0.029 | 6.22E-05 | 18645 | -3.369             | -5.618   | -1.120   | 1.147   | -2.937 | -0.021 | 3.32E-03 | 18828 |
| 23                 | Rectus_L             | 1.925   | 0.862   | 2.988   | 0.542  | 3.549 | 0.026 | 3.88E-04 | 18645 | -2.459             | -4.353   | -0.564   | 0.967   | -2.544 | -0.019 | 1.10E-02 | 18828 |
| 24                 | Rectus_R             | 2.197   | 1.214   | 3.181   | 0.502  | 4.379 | 0.032 | 1.20E-05 | 18645 | -2.185             | -3.937   | -0.432   | 0.894   | -2.443 | -0.018 | 1.46E-02 | 18828 |
| 25                 | OFCmed_L             | 0.989   | 0.373   | 1.605   | 0.314  | 3.146 | 0.023 | 1.66E-03 | 18645 | -1.344             | -2.442   | -0.246   | 0.560   | -2.400 | -0.017 | 1.64E-02 | 18828 |
| 26                 | OFCmed_R             | 1.265   | 0.548   | 1.982   | 0.366  | 3.456 | 0.025 | 5.49E-04 | 18645 | -1.533             | -2.813   | -0.254   | 0.653   | -2.349 | -0.017 | 1.88E-02 | 18828 |
| 27                 | OFCant_L             | 0.647   | -0.066  | 1.360   | 0.364  | 1.779 | 0.013 | 7.52E-02 | 18645 | -1.728             | -2.998   | -0.459   | 0.648   | -2.669 | -0.019 | 7.61E-03 | 18828 |
| 28                 | OFCant_R             | 1.370   | 0.431   | 2.310   | 0.479  | 2.858 | 0.021 | 4.26E-03 | 18645 | -2.884             | -4.560   | -1.208   | 0.855   | -3.373 | -0.025 | 7.46E-04 | 18828 |
| 29                 | OFCpost_L            | 0.658   | -0.233  | 1.549   | 0.455  | 1.447 | 0.011 | 1.48E-01 | 18645 | -1.521             | -3.109   | 0.068    | 0.811   | -1.876 | -0.014 | 6.06E-02 | 18828 |
| 30                 | OFCpost_R            | 1.075   | 0.251   | 1.899   | 0.421  | 2.557 | 0.019 | 1.06E-02 | 18645 | -2.130             | -3.598   | -0.662   | 0.749   | -2.844 | -0.021 | 4.46E-03 | 18828 |
| 31                 | OFClat_L             | 0.680   | 0.379   | 0.980   | 0.153  | 4.433 | 0.032 | 9.34E-06 | 18645 | -0.398             | -0.935   | 0.138    | 0.274   | -1.456 | -0.011 | 1.46E-01 | 18828 |
| 32                 | OFClat_R             | 0.715   | 0.461   | 0.969   | 0.129  | 5.524 | 0.040 | 3.37E-08 | 18645 | -0.775             | -1.227   | -0.322   | 0.231   | -3.354 | -0.024 | 7.99E-04 | 18828 |
| 33                 | Insula_L             | 1.823   | -0.936  | 4.581   | 1.407  | 1.295 | 0.009 | 1.95E-01 | 18645 | -6.386             | -11.299  | -1.472   | 2.507   | -2.547 | -0.019 | 1.09E-02 | 18828 |

|    |                      |        |        |        |       |        |        |          |       |         |         |        |       |        |        |          |       |
|----|----------------------|--------|--------|--------|-------|--------|--------|----------|-------|---------|---------|--------|-------|--------|--------|----------|-------|
| 34 | Insula_R             | 1.377  | -1.313 | 4.067  | 1.372 | 1.004  | 0.007  | 3.16E-01 | 18645 | -7.398  | -12.187 | -2.609 | 2.443 | -3.028 | -0.022 | 2.47E-03 | 18828 |
| 37 | Cingulate_Mid_L      | 5.237  | 2.904  | 7.570  | 1.190 | 4.400  | 0.032  | 1.09E-05 | 18645 | -13.122 | -17.276 | -8.968 | 2.119 | -6.192 | -0.045 | 6.08E-10 | 18828 |
| 38 | Cingulate_Mid_R      | 3.343  | 0.855  | 5.831  | 1.269 | 2.634  | 0.019  | 8.45E-03 | 18645 | -12.023 | -16.452 | -7.594 | 2.260 | -5.321 | -0.039 | 1.04E-07 | 18828 |
| 39 | Cingulate_Post_L     | -0.109 | -0.821 | 0.603  | 0.363 | -0.299 | -0.002 | 7.65E-01 | 18645 | -2.606  | -3.875  | -1.338 | 0.647 | -4.028 | -0.029 | 5.64E-05 | 18828 |
| 40 | Cingulate_Post_R     | -0.330 | -0.725 | 0.066  | 0.202 | -1.635 | -0.012 | 1.02E-01 | 18645 | -0.965  | -1.669  | -0.261 | 0.359 | -2.687 | -0.020 | 7.22E-03 | 18828 |
| 41 | Hippocampus_L        | 1.713  | 0.563  | 2.864  | 0.587 | 2.919  | 0.021  | 3.52E-03 | 18645 | -0.979  | -3.031  | 1.074  | 1.047 | -0.935 | -0.007 | 3.50E-01 | 18828 |
| 42 | Hippocampus_R        | 2.161  | 0.967  | 3.355  | 0.609 | 3.547  | 0.026  | 3.90E-04 | 18645 | -0.691  | -2.820  | 1.437  | 1.086 | -0.637 | -0.005 | 5.24E-01 | 18828 |
| 43 | ParaHippocampal_L    | 2.322  | 1.300  | 3.343  | 0.521 | 4.455  | 0.033  | 8.43E-06 | 18645 | -1.584  | -3.407  | 0.240  | 0.930 | -1.702 | -0.012 | 8.87E-02 | 18828 |
| 44 | ParaHippocampal_R    | 2.537  | 1.245  | 3.829  | 0.659 | 3.849  | 0.028  | 1.19E-04 | 18645 | -1.260  | -3.561  | 1.042  | 1.174 | -1.073 | -0.008 | 2.83E-01 | 18828 |
| 45 | Amygdala_L           | 0.182  | -0.216 | 0.580  | 0.203 | 0.897  | 0.007  | 3.69E-01 | 18645 | -0.151  | -0.860  | 0.557  | 0.362 | -0.419 | -0.003 | 6.76E-01 | 18828 |
| 46 | Amygdala_R           | 0.241  | -0.166 | 0.648  | 0.208 | 1.160  | 0.008  | 2.46E-01 | 18645 | -0.508  | -1.233  | 0.216  | 0.370 | -1.375 | -0.010 | 1.69E-01 | 18828 |
| 47 | Calcarine_L          | 1.003  | -2.788 | 4.794  | 1.934 | 0.518  | 0.004  | 6.04E-01 | 18645 | -1.398  | -8.158  | 5.363  | 3.449 | -0.405 | -0.003 | 6.85E-01 | 18828 |
| 48 | Calcarine_R          | 0.105  | -3.065 | 3.275  | 1.617 | 0.065  | 0.000  | 9.48E-01 | 18645 | -1.649  | -7.297  | 3.999  | 2.882 | -0.572 | -0.004 | 5.67E-01 | 18828 |
| 49 | Cuneus_L             | 0.791  | -1.590 | 3.171  | 1.215 | 0.651  | 0.005  | 5.15E-01 | 18645 | -2.188  | -6.430  | 2.055  | 2.164 | -1.011 | -0.007 | 3.12E-01 | 18828 |
| 50 | Cuneus_R             | -0.040 | -1.861 | 1.782  | 0.929 | -0.043 | 0.000  | 9.66E-01 | 18645 | -4.964  | -8.208  | -1.719 | 1.655 | -2.999 | -0.022 | 2.72E-03 | 18828 |
| 51 | Lingual_L            | 2.700  | 0.417  | 4.982  | 1.165 | 2.318  | 0.017  | 2.04E-02 | 18645 | -4.775  | -8.846  | -0.704 | 2.077 | -2.299 | -0.017 | 2.15E-02 | 18828 |
| 52 | Lingual_R            | 1.797  | -0.593 | 4.187  | 1.220 | 1.473  | 0.011  | 1.41E-01 | 18645 | -2.604  | -6.867  | 1.658  | 2.175 | -1.198 | -0.009 | 2.31E-01 | 18828 |
| 53 | Occipital_Sup_L      | 1.726  | 0.158  | 3.295  | 0.800 | 2.157  | 0.016  | 3.10E-02 | 18645 | -4.608  | -7.406  | -1.810 | 1.427 | -3.228 | -0.024 | 1.25E-03 | 18828 |
| 54 | Occipital_Sup_R      | 0.738  | -0.964 | 2.439  | 0.868 | 0.850  | 0.006  | 3.95E-01 | 18645 | -4.721  | -7.752  | -1.690 | 1.546 | -3.053 | -0.022 | 2.27E-03 | 18828 |
| 55 | Occipital_Mid_L      | -1.550 | -5.228 | 2.128  | 1.876 | -0.826 | -0.006 | 4.09E-01 | 18645 | -9.889  | -16.443 | -3.336 | 3.343 | -2.958 | -0.022 | 3.10E-03 | 18828 |
| 56 | Occipital_Mid_R      | 0.196  | -2.365 | 2.757  | 1.307 | 0.150  | 0.001  | 8.81E-01 | 18645 | -3.520  | -8.083  | 1.042  | 2.328 | -1.512 | -0.011 | 1.30E-01 | 18828 |
| 57 | Occipital_Inf_L      | -1.227 | -2.446 | -0.008 | 0.622 | -1.973 | -0.014 | 4.85E-02 | 18645 | -2.495  | -4.669  | -0.322 | 1.109 | -2.250 | -0.016 | 2.45E-02 | 18828 |
| 58 | Occipital_Inf_R      | -2.853 | -4.263 | -1.444 | 0.719 | -3.968 | -0.029 | 7.29E-05 | 18645 | -0.650  | -3.162  | 1.861  | 1.281 | -0.507 | -0.004 | 6.12E-01 | 18828 |
| 59 | Fusiform_L           | 4.382  | 1.712  | 7.053  | 1.362 | 3.217  | 0.024  | 1.30E-03 | 18645 | -6.404  | -11.166 | -1.642 | 2.429 | -2.636 | -0.019 | 8.39E-03 | 18828 |
| 60 | Fusiform_R           | 5.001  | 2.066  | 7.936  | 1.497 | 3.340  | 0.024  | 8.39E-04 | 18645 | -4.069  | -9.299  | 1.160  | 2.668 | -1.525 | -0.011 | 1.27E-01 | 18828 |
| 61 | Postcentral_L        | 9.490  | 5.476  | 13.505 | 2.048 | 4.634  | 0.034  | 3.62E-06 | 18645 | -14.397 | -21.558 | -7.236 | 3.653 | -3.941 | -0.029 | 8.15E-05 | 18828 |
| 62 | Postcentral_R        | 9.560  | 5.445  | 13.675 | 2.099 | 4.554  | 0.033  | 5.31E-06 | 18645 | -11.606 | -18.942 | -4.270 | 3.743 | -3.101 | -0.023 | 1.93E-03 | 18828 |
| 63 | Parietal_Sup_L       | 0.344  | -1.971 | 2.658  | 1.181 | 0.291  | 0.002  | 7.71E-01 | 18645 | -3.801  | -7.927  | 0.325  | 2.105 | -1.806 | -0.013 | 7.10E-02 | 18828 |
| 64 | Parietal_Sup_R       | 0.553  | -1.501 | 2.606  | 1.048 | 0.527  | 0.004  | 5.98E-01 | 18645 | -4.487  | -8.145  | -0.829 | 1.866 | -2.404 | -0.018 | 1.62E-02 | 18828 |
| 65 | Parietal_Inf_L       | 3.410  | 0.379  | 6.441  | 1.546 | 2.205  | 0.016  | 2.74E-02 | 18645 | -13.144 | -18.545 | -7.744 | 2.755 | -4.771 | -0.035 | 1.85E-06 | 18828 |
| 66 | Parietal_Inf_R       | 1.279  | -0.687 | 3.245  | 1.003 | 1.275  | 0.009  | 2.02E-01 | 18645 | -6.196  | -9.699  | -2.693 | 1.787 | -3.467 | -0.025 | 5.27E-04 | 18828 |
| 67 | SupraMarginal_L      | 1.643  | -0.133 | 3.419  | 0.906 | 1.813  | 0.013  | 6.98E-02 | 18645 | -5.852  | -9.019  | -2.686 | 1.615 | -3.622 | -0.026 | 2.93E-04 | 18828 |
| 68 | SupraMarginal_R      | 3.738  | 1.225  | 6.251  | 1.282 | 2.916  | 0.021  | 3.55E-03 | 18645 | -11.121 | -15.604 | -6.639 | 2.287 | -4.863 | -0.035 | 1.16E-06 | 18828 |
| 69 | Angular_L            | 2.150  | 0.405  | 3.896  | 0.891 | 2.414  | 0.018  | 1.58E-02 | 18645 | -6.692  | -9.803  | -3.582 | 1.587 | -4.217 | -0.031 | 2.49E-05 | 18828 |
| 70 | Angular_R            | 1.747  | -0.594 | 4.088  | 1.194 | 1.463  | 0.011  | 1.44E-01 | 18645 | -5.294  | -9.463  | -1.125 | 2.127 | -2.489 | -0.018 | 1.28E-02 | 18828 |
| 71 | Precuneus_L          | 3.143  | -1.115 | 7.401  | 2.172 | 1.447  | 0.011  | 1.48E-01 | 18645 | -9.885  | -17.469 | -2.300 | 3.870 | -2.554 | -0.019 | 1.06E-02 | 18828 |
| 72 | Precuneus_R          | 1.126  | -2.665 | 4.917  | 1.934 | 0.582  | 0.004  | 5.60E-01 | 18645 | -11.043 | -17.796 | -4.290 | 3.445 | -3.205 | -0.023 | 1.35E-03 | 18828 |
| 73 | Paracentral_Lobule_L | -0.039 | -1.986 | 1.909  | 0.994 | -0.039 | 0.000  | 9.69E-01 | 18645 | -2.103  | -5.576  | 1.369  | 1.772 | -1.187 | -0.009 | 2.35E-01 | 18828 |
| 74 | Paracentral_Lobule_R | 0.584  | -0.811 | 1.980  | 0.712 | 0.821  | 0.006  | 4.12E-01 | 18645 | -1.043  | -3.530  | 1.445  | 1.269 | -0.822 | -0.006 | 4.11E-01 | 18828 |
| 75 | Caudate_L            | 1.739  | 0.186  | 3.292  | 0.792 | 2.195  | 0.016  | 2.82E-02 | 18645 | -3.630  | -6.404  | -0.856 | 1.415 | -2.565 | -0.019 | 1.03E-02 | 18828 |
| 76 | Caudate_R            | 2.283  | 0.522  | 4.044  | 0.898 | 2.542  | 0.019  | 1.10E-02 | 18645 | -4.863  | -8.005  | -1.721 | 1.603 | -3.033 | -0.022 | 2.42E-03 | 18828 |
| 77 | Putamen_L            | 2.897  | 0.536  | 5.259  | 1.205 | 2.405  | 0.018  | 1.62E-02 | 18645 | -7.688  | -11.899 | -3.477 | 2.149 | -3.578 | -0.026 | 3.47E-04 | 18828 |
| 78 | Putamen_R            | 2.477  | 0.072  | 4.883  | 1.227 | 2.019  | 0.015  | 4.35E-02 | 18645 | -7.993  | -12.284 | -3.703 | 2.189 | -3.652 | -0.027 | 2.61E-04 | 18828 |
| 79 | Pallidum_L           | 0.137  | -0.074 | 0.347  | 0.107 | 1.274  | 0.009  | 2.03E-01 | 18645 | -0.490  | -0.865  | -0.116 | 0.191 | -2.567 | -0.019 | 1.03E-02 | 18828 |
| 80 | Pallidum_R           | 0.116  | -0.115 | 0.346  | 0.118 | 0.983  | 0.007  | 3.26E-01 | 18645 | -0.677  | -1.088  | -0.266 | 0.210 | -3.231 | -0.024 | 1.24E-03 | 18828 |
| 83 | Heschl_L             | 0.030  | -0.396 | 0.456  | 0.217 | 0.138  | 0.001  | 8.90E-01 | 18645 | -0.864  | -1.623  | -0.105 | 0.387 | -2.232 | -0.016 | 2.56E-02 | 18828 |
| 84 | Heschl_R             | 0.186  | -0.290 | 0.662  | 0.243 | 0.766  | 0.006  | 4.44E-01 | 18645 | -1.369  | -2.217  | -0.521 | 0.433 | -3.164 | -0.023 | 1.56E-03 | 18828 |
| 85 | Temporal_Sup_L       | 2.001  | -1.073 | 5.074  | 1.568 | 1.276  | 0.009  | 2.02E-01 | 18645 | -7.622  | -13.099 | -2.144 | 2.795 | -2.727 | -0.020 | 6.39E-03 | 18828 |
| 86 | Temporal_Sup_R       | 4.799  | 1.398  | 8.200  | 1.735 | 2.766  | 0.020  | 5.69E-03 | 18645 | -13.935 | -19.997 | -7.873 | 3.093 | -4.506 | -0.033 | 6.65E-06 | 18828 |

|     |                     |        |        |        |       |        |        |          |       |         |         |        |       |        |        |          |       |
|-----|---------------------|--------|--------|--------|-------|--------|--------|----------|-------|---------|---------|--------|-------|--------|--------|----------|-------|
| 87  | Temporal_Pole_Sup_L | 1.162  | -0.294 | 2.619  | 0.743 | 1.565  | 0.011  | 1.18E-01 | 18645 | -2.657  | -5.252  | -0.062 | 1.324 | -2.007 | -0.015 | 4.48E-02 | 18828 |
| 88  | Temporal_Pole_Sup_R | 1.961  | 0.428  | 3.495  | 0.783 | 2.507  | 0.018  | 1.22E-02 | 18645 | -4.371  | -7.102  | -1.640 | 1.393 | -3.138 | -0.023 | 1.71E-03 | 18828 |
| 89  | Temporal_Mid_L      | 7.888  | 2.761  | 13.014 | 2.615 | 3.016  | 0.022  | 2.57E-03 | 18645 | -14.104 | -23.239 | -4.968 | 4.661 | -3.026 | -0.022 | 2.48E-03 | 18828 |
| 90  | Temporal_Mid_R      | 3.822  | -0.729 | 8.373  | 2.322 | 1.646  | 0.012  | 9.98E-02 | 18645 | -15.293 | -23.400 | -7.187 | 4.136 | -3.698 | -0.027 | 2.18E-04 | 18828 |
| 91  | Temporal_Pole_Mid_L | 1.273  | 0.050  | 2.497  | 0.624 | 2.040  | 0.015  | 4.14E-02 | 18645 | -1.503  | -3.685  | 0.679  | 1.113 | -1.350 | -0.010 | 1.77E-01 | 18828 |
| 92  | Temporal_Pole_Mid_R | 2.081  | 0.595  | 3.568  | 0.758 | 2.744  | 0.020  | 6.07E-03 | 18645 | -2.673  | -5.321  | -0.024 | 1.351 | -1.978 | -0.014 | 4.79E-02 | 18828 |
| 93  | Temporal_Inf_L      | 1.276  | -2.247 | 4.798  | 1.797 | 0.710  | 0.005  | 4.78E-01 | 18645 | -6.727  | -13.008 | -0.446 | 3.204 | -2.099 | -0.015 | 3.58E-02 | 18828 |
| 94  | Temporal_Inf_R      | 0.036  | -3.808 | 3.880  | 1.961 | 0.018  | 0.000  | 9.85E-01 | 18645 | -7.495  | -14.335 | -0.654 | 3.490 | -2.147 | -0.016 | 3.18E-02 | 18828 |
| 95  | Cerebellum_Crus1_L  | 5.318  | 1.130  | 9.506  | 2.137 | 2.489  | 0.018  | 1.28E-02 | 18645 | -1.521  | -8.980  | 5.939  | 3.806 | -0.400 | -0.003 | 6.89E-01 | 18828 |
| 96  | Cerebellum_Crus1_R  | 6.703  | 2.436  | 10.971 | 2.177 | 3.079  | 0.023  | 2.08E-03 | 18645 | -1.875  | -9.480  | 5.730  | 3.880 | -0.483 | -0.004 | 6.29E-01 | 18828 |
| 97  | Cerebellum_Crus2_L  | 7.351  | 4.033  | 10.670 | 1.693 | 4.343  | 0.032  | 1.42E-05 | 18645 | -6.735  | -12.653 | -0.818 | 3.019 | -2.231 | -0.016 | 2.57E-02 | 18828 |
| 98  | Cerebellum_Crus2_R  | 6.999  | 3.932  | 10.067 | 1.565 | 4.473  | 0.033  | 7.78E-06 | 18645 | -4.485  | -9.955  | 0.985  | 2.791 | -1.607 | -0.012 | 1.08E-01 | 18828 |
| 99  | Cerebellum_3_L      | 0.167  | -0.056 | 0.389  | 0.114 | 1.467  | 0.011  | 1.42E-01 | 18645 | 0.166   | -0.231  | 0.563  | 0.202 | 0.821  | 0.006  | 4.12E-01 | 18828 |
| 100 | Cerebellum_3_R      | 0.301  | 0.000  | 0.601  | 0.153 | 1.963  | 0.014  | 4.97E-02 | 18645 | -0.088  | -0.624  | 0.448  | 0.273 | -0.322 | -0.002 | 7.48E-01 | 18828 |
| 101 | Cerebellum_4_5_L    | 2.727  | 0.926  | 4.529  | 0.919 | 2.967  | 0.022  | 3.01E-03 | 18645 | -0.448  | -3.659  | 2.762  | 1.638 | -0.274 | -0.002 | 7.84E-01 | 18828 |
| 102 | Cerebellum_4_5_R    | 2.262  | 0.794  | 3.729  | 0.749 | 3.020  | 0.022  | 2.53E-03 | 18645 | -1.056  | -3.672  | 1.560  | 1.335 | -0.791 | -0.006 | 4.29E-01 | 18828 |
| 103 | Cerebellum_6_L      | 4.996  | 1.877  | 8.115  | 1.591 | 3.140  | 0.023  | 1.69E-03 | 18645 | -5.118  | -10.672 | 0.436  | 2.834 | -1.806 | -0.013 | 7.09E-02 | 18828 |
| 104 | Cerebellum_6_R      | 5.902  | 2.618  | 9.186  | 1.676 | 3.522  | 0.026  | 4.29E-04 | 18645 | -2.743  | -8.593  | 3.107  | 2.985 | -0.919 | -0.007 | 3.58E-01 | 18828 |
| 105 | Cerebellum_7b_L     | 2.614  | 1.600  | 3.629  | 0.518 | 5.051  | 0.037  | 4.43E-07 | 18645 | -1.705  | -3.514  | 0.104  | 0.923 | -1.847 | -0.013 | 6.47E-02 | 18828 |
| 106 | Cerebellum_7b_R     | 3.147  | 2.142  | 4.151  | 0.513 | 6.137  | 0.045  | 8.57E-10 | 18645 | -1.968  | -3.760  | -0.176 | 0.914 | -2.153 | -0.016 | 3.14E-02 | 18828 |
| 107 | Cerebellum_8_L      | 4.952  | 1.730  | 8.174  | 1.644 | 3.013  | 0.022  | 2.59E-03 | 18645 | -2.212  | -7.958  | 3.534  | 2.931 | -0.755 | -0.005 | 4.51E-01 | 18828 |
| 108 | Cerebellum_8_R      | 10.552 | 6.358  | 14.746 | 2.140 | 4.932  | 0.036  | 8.23E-07 | 18645 | -8.507  | -15.984 | -1.030 | 3.815 | -2.230 | -0.016 | 2.58E-02 | 18828 |
| 109 | Cerebellum_9_L      | -1.590 | -3.411 | 0.232  | 0.929 | -1.711 | -0.013 | 8.72E-02 | 18645 | -1.650  | -4.897  | 1.596  | 1.656 | -0.997 | -0.007 | 3.19E-01 | 18828 |
| 110 | Cerebellum_9_R      | -1.430 | -3.222 | 0.361  | 0.914 | -1.565 | -0.011 | 1.18E-01 | 18645 | -1.686  | -4.878  | 1.506  | 1.628 | -1.035 | -0.008 | 3.01E-01 | 18828 |
| 111 | Cerebellum_10_L     | -0.177 | -0.306 | -0.047 | 0.066 | -2.680 | -0.020 | 7.37E-03 | 18645 | -0.044  | -0.274  | 0.186  | 0.117 | -0.374 | -0.003 | 7.08E-01 | 18828 |
| 112 | Cerebellum_10_R     | -0.023 | -0.158 | 0.111  | 0.069 | -0.341 | -0.002 | 7.33E-01 | 18645 | -0.067  | -0.307  | 0.172  | 0.122 | -0.550 | -0.004 | 5.82E-01 | 18828 |
| 113 | Vermis_1_2          | 0.033  | -0.051 | 0.117  | 0.043 | 0.760  | 0.006  | 4.47E-01 | 18645 | -0.019  | -0.169  | 0.130  | 0.076 | -0.255 | -0.002 | 7.99E-01 | 18828 |
| 114 | Vermis_3            | 0.373  | 0.040  | 0.707  | 0.170 | 2.193  | 0.016  | 2.84E-02 | 18645 | -0.428  | -1.023  | 0.167  | 0.304 | -1.409 | -0.010 | 1.59E-01 | 18828 |
| 115 | Vermis_4_5          | 1.039  | 0.059  | 2.019  | 0.500 | 2.078  | 0.015  | 3.77E-02 | 18645 | -0.284  | -2.033  | 1.465  | 0.892 | -0.318 | -0.002 | 7.50E-01 | 18828 |
| 116 | Vermis_6            | 0.098  | -0.448 | 0.644  | 0.279 | 0.352  | 0.003  | 7.25E-01 | 18645 | -0.258  | -1.232  | 0.716  | 0.497 | -0.520 | -0.004 | 6.03E-01 | 18828 |
| 117 | Vermis_7            | 0.134  | -0.175 | 0.443  | 0.158 | 0.851  | 0.006  | 3.95E-01 | 18645 | -0.133  | -0.684  | 0.417  | 0.281 | -0.474 | -0.003 | 6.35E-01 | 18828 |
| 118 | Vermis_8            | -0.078 | -0.586 | 0.430  | 0.259 | -0.303 | -0.002 | 7.62E-01 | 18645 | -0.603  | -1.508  | 0.303  | 0.462 | -1.305 | -0.010 | 1.92E-01 | 18828 |
| 119 | Vermis_9            | -0.285 | -0.697 | 0.127  | 0.210 | -1.355 | -0.010 | 1.76E-01 | 18645 | -0.047  | -0.781  | 0.687  | 0.374 | -0.125 | -0.001 | 9.01E-01 | 18828 |
| 120 | Vermis_10           | -0.124 | -0.239 | -0.009 | 0.059 | -2.114 | -0.015 | 3.45E-02 | 18645 | 0.126   | -0.079  | 0.330  | 0.104 | 1.204  | 0.009  | 2.29E-01 | 18828 |
| 121 | Thal_AV_L           | 0.097  | 0.051  | 0.143  | 0.023 | 4.162  | 0.030  | 3.17E-05 | 18645 | -0.137  | -0.218  | -0.055 | 0.042 | -3.272 | -0.024 | 1.07E-03 | 18828 |
| 122 | Thal_AV_R           | 0.156  | 0.090  | 0.221  | 0.033 | 4.675  | 0.034  | 2.96E-06 | 18645 | -0.169  | -0.286  | -0.052 | 0.060 | -2.829 | -0.021 | 4.68E-03 | 18828 |
| 123 | Thal_LP_L           | 0.112  | 0.061  | 0.163  | 0.026 | 4.332  | 0.032  | 1.49E-05 | 18645 | -0.184  | -0.275  | -0.093 | 0.046 | -3.977 | -0.029 | 7.00E-05 | 18828 |
| 124 | Thal_LP_R           | 0.154  | 0.088  | 0.220  | 0.034 | 4.574  | 0.033  | 4.83E-06 | 18645 | -0.247  | -0.365  | -0.129 | 0.060 | -4.099 | -0.030 | 4.17E-05 | 18828 |
| 125 | Thal_VA_L           | 0.062  | 0.008  | 0.116  | 0.028 | 2.234  | 0.016  | 2.55E-02 | 18645 | -0.068  | -0.164  | 0.029  | 0.049 | -1.370 | -0.010 | 1.71E-01 | 18828 |
| 126 | Thal_VA_R           | 0.108  | 0.041  | 0.174  | 0.034 | 3.170  | 0.023  | 1.53E-03 | 18645 | -0.088  | -0.207  | 0.031  | 0.061 | -1.456 | -0.011 | 1.45E-01 | 18828 |
| 127 | Thal_VL_L           | 0.279  | 0.124  | 0.433  | 0.079 | 3.537  | 0.026  | 4.06E-04 | 18645 | -0.577  | -0.853  | -0.302 | 0.141 | -4.108 | -0.030 | 4.01E-05 | 18828 |
| 128 | Thal_VL_R           | 0.563  | 0.358  | 0.767  | 0.104 | 5.388  | 0.039  | 7.20E-08 | 18645 | -0.794  | -1.159  | -0.428 | 0.186 | -4.257 | -0.031 | 2.08E-05 | 18828 |
| 129 | Thal_VPL_L          | 0.187  | 0.003  | 0.371  | 0.094 | 1.996  | 0.015  | 4.59E-02 | 18645 | -0.493  | -0.820  | -0.165 | 0.167 | -2.949 | -0.021 | 3.20E-03 | 18828 |
| 130 | Thal_VPL_R          | 0.367  | 0.173  | 0.560  | 0.099 | 3.718  | 0.027  | 2.01E-04 | 18645 | -0.699  | -1.043  | -0.355 | 0.176 | -3.978 | -0.029 | 6.97E-05 | 18828 |
| 131 | Thal_IL_L           | 0.196  | 0.117  | 0.276  | 0.041 | 4.841  | 0.035  | 1.30E-06 | 18645 | -0.379  | -0.520  | -0.237 | 0.072 | -5.235 | -0.038 | 1.67E-07 | 18828 |
| 132 | Thal_IL_R           | 0.272  | 0.182  | 0.362  | 0.046 | 5.929  | 0.043  | 3.10E-09 | 18645 | -0.404  | -0.565  | -0.244 | 0.082 | -4.928 | -0.036 | 8.39E-07 | 18828 |
| 133 | Thal_Re_L           | 0.001  | 0.000  | 0.001  | 0.000 | 3.361  | 0.025  | 7.78E-04 | 18645 | 0.000   | -0.001  | 0.000  | 0.000 | -0.680 | -0.005 | 4.96E-01 | 18828 |
| 134 | Thal_Re_R           | 0.007  | 0.004  | 0.009  | 0.001 | 4.852  | 0.036  | 1.23E-06 | 18645 | -0.006  | -0.011  | -0.001 | 0.002 | -2.347 | -0.017 | 1.89E-02 | 18828 |
| 135 | Thal_MDm_L          | 1.722  | 1.134  | 2.310  | 0.300 | 5.744  | 0.042  | 9.39E-09 | 18645 | -2.876  | -3.926  | -1.827 | 0.536 | -5.371 | -0.039 | 7.93E-08 | 18828 |

|     |            |        |        |       |       |        |        |          |       |        |        |        |       |        |        |          |       |
|-----|------------|--------|--------|-------|-------|--------|--------|----------|-------|--------|--------|--------|-------|--------|--------|----------|-------|
| 136 | Thal_MDm_R | 2.090  | 1.408  | 2.772 | 0.348 | 6.004  | 0.044  | 1.96E-09 | 18645 | -3.086 | -4.306 | -1.866 | 0.623 | -4.957 | -0.036 | 7.21E-07 | 18828 |
| 137 | Thal_MDl_L | 0.315  | 0.213  | 0.417 | 0.052 | 6.058  | 0.044  | 1.40E-09 | 18645 | -0.533 | -0.715 | -0.351 | 0.093 | -5.750 | -0.042 | 9.06E-09 | 18828 |
| 138 | Thal_MDl_R | 0.375  | 0.260  | 0.491 | 0.059 | 6.362  | 0.047  | 2.04E-10 | 18645 | -0.546 | -0.753 | -0.340 | 0.105 | -5.182 | -0.038 | 2.21E-07 | 18828 |
| 139 | Thal_LGN_L | 0.028  | 0.012  | 0.043 | 0.008 | 3.523  | 0.026  | 4.27E-04 | 18645 | -0.049 | -0.076 | -0.021 | 0.014 | -3.471 | -0.025 | 5.19E-04 | 18828 |
| 140 | Thal_LGN_R | 0.083  | 0.050  | 0.116 | 0.017 | 4.931  | 0.036  | 8.27E-07 | 18645 | -0.150 | -0.209 | -0.091 | 0.030 | -5.010 | -0.036 | 5.50E-07 | 18828 |
| 141 | Thal_MGN_L | 0.046  | 0.018  | 0.073 | 0.014 | 3.233  | 0.024  | 1.23E-03 | 18645 | -0.130 | -0.179 | -0.081 | 0.025 | -5.178 | -0.038 | 2.27E-07 | 18828 |
| 142 | Thal_MGN_R | 0.067  | 0.037  | 0.097 | 0.015 | 4.374  | 0.032  | 1.22E-05 | 18645 | -0.145 | -0.198 | -0.091 | 0.027 | -5.293 | -0.039 | 1.22E-07 | 18828 |
| 143 | Thal_PuA_L | 0.064  | 0.031  | 0.097 | 0.017 | 3.836  | 0.028  | 1.25E-04 | 18645 | -0.163 | -0.221 | -0.105 | 0.030 | -5.492 | -0.040 | 4.04E-08 | 18828 |
| 144 | Thal_PuA_R | 0.166  | 0.098  | 0.234 | 0.035 | 4.801  | 0.035  | 1.59E-06 | 18645 | -0.340 | -0.461 | -0.219 | 0.062 | -5.513 | -0.040 | 3.57E-08 | 18828 |
| 145 | Thal_PuM_L | 1.561  | 0.913  | 2.210 | 0.331 | 4.721  | 0.035  | 2.36E-06 | 18645 | -3.015 | -4.171 | -1.860 | 0.589 | -5.115 | -0.037 | 3.16E-07 | 18828 |
| 146 | Thal_PuM_R | 2.021  | 1.214  | 2.829 | 0.412 | 4.908  | 0.036  | 9.29E-07 | 18645 | -3.602 | -5.042 | -2.162 | 0.735 | -4.903 | -0.036 | 9.52E-07 | 18828 |
| 147 | Thal_PuL_L | 0.281  | 0.163  | 0.400 | 0.060 | 4.664  | 0.034  | 3.12E-06 | 18645 | -0.522 | -0.733 | -0.311 | 0.108 | -4.853 | -0.035 | 1.22E-06 | 18828 |
| 148 | Thal_PuL_R | 0.466  | 0.278  | 0.654 | 0.096 | 4.856  | 0.036  | 1.20E-06 | 18645 | -0.827 | -1.162 | -0.491 | 0.171 | -4.832 | -0.035 | 1.36E-06 | 18828 |
| 149 | Thal_PuI_L | 0.028  | -0.005 | 0.060 | 0.016 | 1.675  | 0.012  | 9.39E-02 | 18645 | -0.063 | -0.121 | -0.006 | 0.029 | -2.161 | -0.016 | 3.07E-02 | 18828 |
| 150 | Thal_PuI_R | 0.071  | 0.029  | 0.113 | 0.022 | 3.277  | 0.024  | 1.05E-03 | 18645 | -0.127 | -0.203 | -0.051 | 0.039 | -3.289 | -0.024 | 1.01E-03 | 18828 |
| 151 | ACC_sub_L  | -0.072 | -0.444 | 0.299 | 0.190 | -0.381 | -0.003 | 7.03E-01 | 18645 | -0.708 | -1.370 | -0.046 | 0.338 | -2.097 | -0.015 | 3.60E-02 | 18828 |
| 152 | ACC_sub_R  | -0.094 | -0.441 | 0.254 | 0.177 | -0.529 | -0.004 | 5.97E-01 | 18645 | -0.587 | -1.205 | 0.031  | 0.315 | -1.862 | -0.014 | 6.26E-02 | 18828 |
| 153 | ACC_pre_L  | 0.944  | -0.008 | 1.897 | 0.486 | 1.943  | 0.014  | 5.20E-02 | 18645 | -3.453 | -5.149 | -1.756 | 0.865 | -3.990 | -0.029 | 6.63E-05 | 18828 |
| 154 | ACC_pre_R  | 0.847  | -0.070 | 1.764 | 0.468 | 1.811  | 0.013  | 7.02E-02 | 18645 | -3.558 | -5.191 | -1.924 | 0.833 | -4.270 | -0.031 | 1.97E-05 | 18828 |
| 155 | ACC_sup_L  | 0.688  | -0.348 | 1.724 | 0.529 | 1.302  | 0.010  | 1.93E-01 | 18645 | -3.154 | -4.997 | -1.311 | 0.940 | -3.354 | -0.024 | 7.99E-04 | 18828 |
| 156 | ACC_sup_R  | 0.304  | -0.768 | 1.376 | 0.547 | 0.556  | 0.004  | 5.78E-01 | 18645 | -2.766 | -4.676 | -0.857 | 0.974 | -2.839 | -0.021 | 4.52E-03 | 18828 |
| 157 | N_Acc_L    | 0.517  | 0.205  | 0.828 | 0.159 | 3.253  | 0.024  | 1.15E-03 | 18645 | -0.442 | -0.997 | 0.113  | 0.283 | -1.560 | -0.011 | 1.19E-01 | 18828 |
| 158 | N_Acc_R    | 0.315  | 0.046  | 0.585 | 0.138 | 2.292  | 0.017  | 2.19E-02 | 18645 | -0.510 | -0.990 | -0.030 | 0.245 | -2.083 | -0.015 | 3.73E-02 | 18828 |
| 159 | VTA_L      | 0.014  | 0.003  | 0.025 | 0.006 | 2.480  | 0.018  | 1.32E-02 | 18645 | 0.003  | -0.017 | 0.023  | 0.010 | 0.302  | 0.002  | 7.63E-01 | 18828 |
| 160 | VTA_R      | 0.015  | 0.005  | 0.025 | 0.005 | 2.929  | 0.021  | 3.40E-03 | 18645 | -0.009 | -0.026 | 0.009  | 0.009 | -0.972 | -0.007 | 3.31E-01 | 18828 |
| 161 | SN_pc_L    | 0.009  | -0.009 | 0.027 | 0.009 | 0.999  | 0.007  | 3.18E-01 | 18645 | -0.044 | -0.075 | -0.013 | 0.016 | -2.748 | -0.020 | 6.01E-03 | 18828 |
| 162 | SN_pc_R    | 0.017  | -0.006 | 0.040 | 0.012 | 1.470  | 0.011  | 1.42E-01 | 18645 | -0.065 | -0.106 | -0.024 | 0.021 | -3.091 | -0.023 | 2.00E-03 | 18828 |
| 163 | SN_pr_L    | 0.008  | -0.016 | 0.032 | 0.012 | 0.622  | 0.005  | 5.34E-01 | 18645 | -0.039 | -0.082 | 0.003  | 0.022 | -1.817 | -0.013 | 6.92E-02 | 18828 |
| 164 | SN_pr_R    | 0.013  | -0.014 | 0.040 | 0.014 | 0.949  | 0.007  | 3.42E-01 | 18645 | -0.037 | -0.085 | 0.011  | 0.024 | -1.516 | -0.011 | 1.29E-01 | 18828 |
| 165 | Red_N_L    | 0.044  | 0.015  | 0.074 | 0.015 | 2.939  | 0.022  | 3.30E-03 | 18645 | -0.067 | -0.119 | -0.014 | 0.027 | -2.492 | -0.018 | 1.27E-02 | 18828 |
| 166 | Red_N_R    | 0.047  | 0.015  | 0.079 | 0.016 | 2.856  | 0.021  | 4.29E-03 | 18645 | -0.065 | -0.122 | -0.008 | 0.029 | -2.237 | -0.016 | 2.53E-02 | 18828 |
| 167 | LC_L       | 0.003  | -0.008 | 0.014 | 0.006 | 0.489  | 0.004  | 6.25E-01 | 18645 | 0.006  | -0.014 | 0.026  | 0.010 | 0.609  | 0.004  | 5.42E-01 | 18828 |
| 168 | LC_R       | -0.002 | -0.015 | 0.010 | 0.006 | -0.406 | -0.003 | 6.85E-01 | 18645 | 0.001  | -0.020 | 0.023  | 0.011 | 0.113  | 0.001  | 9.10E-01 | 18828 |
| 169 | Raphe_D    | 0.096  | 0.053  | 0.139 | 0.022 | 4.413  | 0.032  | 1.02E-05 | 18645 | -0.100 | -0.176 | -0.023 | 0.039 | -2.564 | -0.019 | 1.04E-02 | 18828 |
| 170 | Raphe_M    | 0.014  | 0.001  | 0.027 | 0.007 | 2.180  | 0.016  | 2.93E-02 | 18645 | 0.002  | -0.021 | 0.025  | 0.012 | 0.167  | 0.001  | 8.68E-01 | 18828 |

|        |                     | Bread intake |         |         |       |        |        |          |       | Pork intake |          |          |        |        |        |          |       |
|--------|---------------------|--------------|---------|---------|-------|--------|--------|----------|-------|-------------|----------|----------|--------|--------|--------|----------|-------|
| Number | AAL 3 region        | beta         | 95%CI l | 95%CI h | se    | t      | r      | p        | df.e  | beta        | 95%CI l  | 95%CI h  | se     | t      | r      | p        | df.e  |
| 0      | Total brain         | 8.626        | -8.644  | 25.895  | 8.811 | 0.979  | 0.007  | 3.28E-01 | 18599 | -469.130    | -663.863 | -274.398 | 99.349 | -4.722 | -0.034 | 2.35E-06 | 18827 |
| 1      | Precenral_L         | -0.062       | -0.669  | 0.546   | 0.310 | -0.200 | -0.001 | 8.42E-01 | 18599 | -6.083      | -12.930  | 0.764    | 3.493  | -1.741 | -0.013 | 8.16E-02 | 18827 |
| 2      | Precenral_R         | 0.311        | -0.246  | 0.867   | 0.284 | 1.094  | 0.008  | 2.74E-01 | 18599 | -9.029      | -15.302  | -2.757   | 3.200  | -2.822 | -0.021 | 4.78E-03 | 18827 |
| 3      | Frontal_Sup_2_L     | 0.954        | 0.312   | 1.596   | 0.327 | 2.914  | 0.021  | 3.58E-03 | 18599 | -10.291     | -17.524  | -3.057   | 3.690  | -2.789 | -0.020 | 5.30E-03 | 18827 |
| 4      | Frontal_Sup_2_R     | 0.805        | 0.097   | 1.512   | 0.361 | 2.230  | 0.016  | 2.58E-02 | 18599 | -13.739     | -21.713  | -5.765   | 4.068  | -3.377 | -0.025 | 7.34E-04 | 18827 |
| 5      | Frontal_Mid_2_L     | 0.163        | -0.511  | 0.836   | 0.344 | 0.474  | 0.003  | 6.36E-01 | 18599 | -9.292      | -16.887  | -1.697   | 3.875  | -2.398 | -0.017 | 1.65E-02 | 18827 |
| 6      | Frontal_Mid_2_R     | 0.845        | 0.083   | 1.607   | 0.389 | 2.175  | 0.016  | 2.97E-02 | 18599 | -14.527     | -23.120  | -5.934   | 4.384  | -3.314 | -0.024 | 9.23E-04 | 18827 |
| 7      | Frontal_Inf_Oper_L  | 0.063        | -0.136  | 0.261   | 0.101 | 0.616  | 0.005  | 5.38E-01 | 18599 | -2.387      | -4.631   | -0.142   | 1.145  | -2.084 | -0.015 | 3.71E-02 | 18827 |
| 8      | Frontal_Inf_Oper_R  | 0.251        | 0.002   | 0.501   | 0.127 | 1.972  | 0.014  | 4.86E-02 | 18599 | -4.495      | -7.309   | -1.681   | 1.436  | -3.130 | -0.023 | 1.75E-03 | 18827 |
| 9      | Frontal_Inf_Tri_L   | 0.242        | -0.181  | 0.664   | 0.216 | 1.120  | 0.008  | 2.63E-01 | 18599 | -8.551      | -13.314  | -3.787   | 2.430  | -3.519 | -0.026 | 4.35E-04 | 18827 |
| 10     | Frontal_Inf_Tri_R   | 0.179        | -0.153  | 0.511   | 0.169 | 1.058  | 0.008  | 2.90E-01 | 18599 | -5.945      | -9.687   | -2.203   | 1.909  | -3.114 | -0.023 | 1.85E-03 | 18827 |
| 11     | Frontal_Inf_Orb_2_L | 0.145        | 0.019   | 0.271   | 0.064 | 2.252  | 0.017  | 2.43E-02 | 18599 | -2.020      | -3.445   | -0.595   | 0.727  | -2.778 | -0.020 | 5.47E-03 | 18827 |

|    |                      |        |        |        |       |        |        |          |       |         |         |        |       |        |        |          |       |
|----|----------------------|--------|--------|--------|-------|--------|--------|----------|-------|---------|---------|--------|-------|--------|--------|----------|-------|
| 12 | Frontal_Inf_Orb_2_R  | 0.109  | -0.023 | 0.241  | 0.067 | 1.614  | 0.012  | 1.07E-01 | 18599 | -2.141  | -3.631  | -0.652 | 0.760 | -2.817 | -0.021 | 4.85E-03 | 18827 |
| 13 | Rolandic_Oper_L      | 0.082  | -0.109 | 0.273  | 0.098 | 0.840  | 0.006  | 4.01E-01 | 18599 | -2.620  | -4.776  | -0.465 | 1.100 | -2.383 | -0.017 | 1.72E-02 | 18827 |
| 14 | Rolandic_Oper_R      | 0.139  | -0.135 | 0.413  | 0.140 | 0.995  | 0.007  | 3.20E-01 | 18599 | -6.203  | -9.287  | -3.118 | 1.574 | -3.941 | -0.029 | 8.13E-05 | 18827 |
| 15 | Supp_Motor_Area_L    | 0.139  | -0.316 | 0.594  | 0.232 | 0.599  | 0.004  | 5.49E-01 | 18599 | -2.585  | -7.710  | 2.539  | 2.615 | -0.989 | -0.007 | 3.23E-01 | 18827 |
| 16 | Supp_Motor_Area_R    | 0.127  | -0.375 | 0.629  | 0.256 | 0.497  | 0.004  | 6.19E-01 | 18599 | -2.650  | -8.313  | 3.013  | 2.889 | -0.917 | -0.007 | 3.59E-01 | 18827 |
| 17 | Olfactory_L          | 0.032  | -0.036 | 0.099  | 0.034 | 0.921  | 0.007  | 3.57E-01 | 18599 | -0.978  | -1.740  | -0.216 | 0.389 | -2.517 | -0.018 | 1.18E-02 | 18827 |
| 18 | Olfactory_R          | 0.041  | -0.027 | 0.109  | 0.035 | 1.191  | 0.009  | 2.34E-01 | 18599 | -1.358  | -2.122  | -0.595 | 0.390 | -3.486 | -0.025 | 4.91E-04 | 18827 |
| 19 | Frontal_Sup_Medial_L | 0.524  | 0.098  | 0.950  | 0.217 | 2.411  | 0.018  | 1.59E-02 | 18599 | -6.959  | -11.763 | -2.156 | 2.451 | -2.840 | -0.021 | 4.52E-03 | 18827 |
| 20 | Frontal_Sup_Medial_R | 0.203  | -0.106 | 0.513  | 0.158 | 1.287  | 0.009  | 1.98E-01 | 18599 | -6.337  | -9.831  | -2.843 | 1.783 | -3.555 | -0.026 | 3.80E-04 | 18827 |
| 21 | Frontal_Med_Orb_L    | 0.188  | 0.029  | 0.348  | 0.081 | 2.322  | 0.017  | 2.02E-02 | 18599 | -3.184  | -4.978  | -1.390 | 0.915 | -3.478 | -0.025 | 5.06E-04 | 18827 |
| 22 | Frontal_Med_Orb_R    | 0.089  | -0.107 | 0.284  | 0.100 | 0.891  | 0.007  | 3.73E-01 | 18599 | -3.257  | -5.462  | -1.052 | 1.125 | -2.895 | -0.021 | 3.79E-03 | 18827 |
| 23 | Rectus_L             | 0.157  | -0.007 | 0.322  | 0.084 | 1.873  | 0.014  | 6.11E-02 | 18599 | -2.981  | -4.838  | -1.123 | 0.948 | -3.145 | -0.023 | 1.66E-03 | 18827 |
| 24 | Rectus_R             | 0.115  | -0.037 | 0.268  | 0.078 | 1.486  | 0.011  | 1.37E-01 | 18599 | -2.134  | -3.853  | -0.415 | 0.877 | -2.434 | -0.018 | 1.50E-02 | 18827 |
| 25 | OFCmed_L             | -0.002 | -0.097 | 0.094  | 0.049 | -0.033 | 0.000  | 9.74E-01 | 18599 | -1.505  | -2.582  | -0.428 | 0.549 | -2.740 | -0.020 | 6.15E-03 | 18827 |
| 26 | OFCmed_R             | 0.037  | -0.075 | 0.148  | 0.057 | 0.646  | 0.005  | 5.18E-01 | 18599 | -0.858  | -2.113  | 0.397  | 0.640 | -1.340 | -0.010 | 1.80E-01 | 18827 |
| 27 | OFCant_L             | -0.031 | -0.141 | 0.080  | 0.056 | -0.544 | -0.004 | 5.86E-01 | 18599 | -1.567  | -2.811  | -0.322 | 0.635 | -2.468 | -0.018 | 1.36E-02 | 18827 |
| 28 | OFCant_R             | 0.080  | -0.066 | 0.225  | 0.074 | 1.071  | 0.008  | 2.84E-01 | 18599 | -2.210  | -3.854  | -0.566 | 0.839 | -2.635 | -0.019 | 8.42E-03 | 18827 |
| 29 | OFCpost_L            | 0.170  | 0.032  | 0.308  | 0.070 | 2.411  | 0.018  | 1.59E-02 | 18599 | -2.455  | -4.012  | -0.897 | 0.795 | -3.089 | -0.023 | 2.01E-03 | 18827 |
| 30 | OFCpost_R            | 0.158  | 0.030  | 0.286  | 0.065 | 2.424  | 0.018  | 1.53E-02 | 18599 | -2.843  | -4.282  | -1.404 | 0.734 | -3.871 | -0.028 | 1.09E-04 | 18827 |
| 31 | OFClat_L             | 0.022  | -0.025 | 0.068  | 0.024 | 0.911  | 0.007  | 3.62E-01 | 18599 | -0.632  | -1.157  | -0.106 | 0.268 | -2.355 | -0.017 | 1.85E-02 | 18827 |
| 32 | OFClat_R             | 0.017  | -0.023 | 0.056  | 0.020 | 0.828  | 0.006  | 4.08E-01 | 18599 | -0.644  | -1.088  | -0.200 | 0.227 | -2.842 | -0.021 | 4.49E-03 | 18827 |
| 33 | Insula_L             | 0.440  | 0.012  | 0.867  | 0.218 | 2.015  | 0.015  | 4.39E-02 | 18599 | -11.925 | -16.742 | -7.108 | 2.457 | -4.853 | -0.035 | 1.23E-06 | 18827 |
| 34 | Insula_R             | 0.518  | 0.102  | 0.935  | 0.212 | 2.440  | 0.018  | 1.47E-02 | 18599 | -10.730 | -15.427 | -6.033 | 2.396 | -4.478 | -0.033 | 7.58E-06 | 18827 |
| 37 | Cingulate_Mid_L      | 0.385  | 0.024  | 0.747  | 0.184 | 2.090  | 0.015  | 3.66E-02 | 18599 | -10.043 | -14.117 | -5.968 | 2.079 | -4.831 | -0.035 | 1.37E-06 | 18827 |
| 38 | Cingulate_Mid_R      | 0.421  | 0.036  | 0.806  | 0.196 | 2.145  | 0.016  | 3.19E-02 | 18599 | -10.113 | -14.456 | -5.770 | 2.216 | -4.564 | -0.033 | 5.04E-06 | 18827 |
| 39 | Cingulate_Post_L     | 0.068  | -0.042 | 0.179  | 0.056 | 1.215  | 0.009  | 2.24E-01 | 18599 | -2.355  | -3.599  | -1.111 | 0.635 | -3.711 | -0.027 | 2.07E-04 | 18827 |
| 40 | Cingulate_Post_R     | 0.012  | -0.049 | 0.073  | 0.031 | 0.387  | 0.003  | 6.99E-01 | 18599 | -0.758  | -1.448  | -0.068 | 0.352 | -2.154 | -0.016 | 3.13E-02 | 18827 |
| 41 | Hippocampus_L        | 0.182  | 0.004  | 0.361  | 0.091 | 1.999  | 0.015  | 4.56E-02 | 18599 | -2.717  | -4.729  | -0.705 | 1.027 | -2.647 | -0.019 | 8.13E-03 | 18827 |
| 42 | Hippocampus_R        | 0.113  | -0.072 | 0.299  | 0.094 | 1.200  | 0.009  | 2.30E-01 | 18599 | -3.011  | -5.099  | -0.923 | 1.065 | -2.827 | -0.021 | 4.71E-03 | 18827 |
| 43 | ParaHippocampa_L     | 0.172  | 0.014  | 0.331  | 0.081 | 2.129  | 0.016  | 3.33E-02 | 18599 | -2.761  | -4.549  | -0.973 | 0.912 | -3.027 | -0.022 | 2.47E-03 | 18827 |
| 44 | ParaHippocampa_R     | 0.267  | 0.067  | 0.467  | 0.102 | 2.614  | 0.019  | 8.97E-03 | 18599 | -4.210  | -6.467  | -1.953 | 1.151 | -3.657 | -0.027 | 2.56E-04 | 18827 |
| 45 | Amygdala_L           | 0.089  | 0.028  | 0.151  | 0.031 | 2.848  | 0.021  | 4.41E-03 | 18599 | -0.611  | -1.305  | 0.084  | 0.355 | -1.722 | -0.013 | 8.50E-02 | 18827 |
| 46 | Amygdala_R           | 0.090  | 0.027  | 0.153  | 0.032 | 2.785  | 0.020  | 5.37E-03 | 18599 | -1.013  | -1.723  | -0.302 | 0.363 | -2.792 | -0.020 | 5.25E-03 | 18827 |
| 47 | Calcarine_L          | -0.899 | -1.487 | -0.312 | 0.300 | -2.999 | -0.022 | 2.71E-03 | 18599 | -1.698  | -8.326  | 4.931  | 3.382 | -0.502 | -0.004 | 6.16E-01 | 18827 |
| 48 | Calcarine_R          | -0.844 | -1.335 | -0.353 | 0.251 | -3.368 | -0.025 | 7.60E-04 | 18599 | -1.720  | -7.260  | 3.820  | 2.826 | -0.609 | -0.004 | 5.43E-01 | 18827 |
| 49 | Cuneus_L             | -0.593 | -0.962 | -0.223 | 0.188 | -3.145 | -0.023 | 1.67E-03 | 18599 | -1.518  | -5.677  | 2.641  | 2.122 | -0.715 | -0.005 | 4.74E-01 | 18827 |
| 50 | Cuneus_R             | -0.352 | -0.634 | -0.069 | 0.144 | -2.443 | -0.018 | 1.46E-02 | 18599 | -1.862  | -5.043  | 1.319  | 1.623 | -1.147 | -0.008 | 2.51E-01 | 18827 |
| 51 | Lingual_L            | -0.309 | -0.663 | 0.045  | 0.181 | -1.709 | -0.013 | 8.74E-02 | 18599 | -3.272  | -7.264  | 0.719  | 2.037 | -1.607 | -0.012 | 1.08E-01 | 18827 |
| 52 | Lingual_R            | -0.238 | -0.609 | 0.132  | 0.189 | -1.260 | -0.009 | 2.08E-01 | 18599 | -3.606  | -7.785  | 0.574  | 2.132 | -1.691 | -0.012 | 9.09E-02 | 18827 |
| 53 | Occipital_Sup_L      | -0.109 | -0.352 | 0.134  | 0.124 | -0.880 | -0.006 | 3.79E-01 | 18599 | -3.181  | -5.925  | -0.438 | 1.399 | -2.273 | -0.017 | 2.30E-02 | 18827 |
| 54 | Occipital_Sup_R      | 0.060  | -0.204 | 0.324  | 0.135 | 0.444  | 0.003  | 6.57E-01 | 18599 | -3.185  | -6.157  | -0.212 | 1.516 | -2.100 | -0.015 | 3.57E-02 | 18827 |
| 55 | Occipital_Mid_L      | -0.175 | -0.746 | 0.395  | 0.291 | -0.603 | -0.004 | 5.47E-01 | 18599 | -6.196  | -12.621 | 0.228  | 3.278 | -1.891 | -0.014 | 5.87E-02 | 18827 |
| 56 | Occipital_Mid_R      | 0.144  | -0.253 | 0.541  | 0.202 | 0.711  | 0.005  | 4.77E-01 | 18599 | -4.238  | -8.713  | 0.236  | 2.283 | -1.857 | -0.014 | 6.34E-02 | 18827 |
| 57 | Occipital_Inf_L      | -0.003 | -0.193 | 0.186  | 0.097 | -0.036 | 0.000  | 9.71E-01 | 18599 | -1.980  | -4.112  | 0.152  | 1.088 | -1.820 | -0.013 | 6.88E-02 | 18827 |
| 58 | Occipital_Inf_R      | 0.155  | -0.064 | 0.374  | 0.112 | 1.386  | 0.010  | 1.66E-01 | 18599 | 0.925   | -1.539  | 3.389  | 1.257 | 0.736  | 0.005  | 4.62E-01 | 18827 |
| 59 | Fusiform_L           | -0.088 | -0.503 | 0.327  | 0.212 | -0.416 | -0.003 | 6.77E-01 | 18599 | -4.348  | -9.018  | 0.322  | 2.382 | -1.825 | -0.013 | 6.80E-02 | 18827 |
| 60 | Fusiform_R           | 0.246  | -0.209 | 0.701  | 0.232 | 1.059  | 0.008  | 2.90E-01 | 18599 | -5.571  | -10.701 | -0.441 | 2.617 | -2.129 | -0.016 | 3.33E-02 | 18827 |
| 61 | Postcentral_L        | 0.336  | -0.287 | 0.960  | 0.318 | 1.058  | 0.008  | 2.90E-01 | 18599 | -7.385  | -14.407 | -0.364 | 3.582 | -2.062 | -0.015 | 3.93E-02 | 18827 |
| 62 | Postcentral_R        | 0.378  | -0.261 | 1.017  | 0.326 | 1.160  | 0.009  | 2.46E-01 | 18599 | -8.005  | -15.202 | -0.807 | 3.672 | -2.180 | -0.016 | 2.93E-02 | 18827 |



|     |                      |        |        |       |       |        |        |          |       |         |         |         |       |        |        |          |       |
|-----|----------------------|--------|--------|-------|-------|--------|--------|----------|-------|---------|---------|---------|-------|--------|--------|----------|-------|
| 63  | Parietal_Sup_L       | -0.165 | -0.524 | 0.195 | 0.183 | -0.897 | -0.007 | 3.69E-01 | 18599 | -3.420  | -7.467  | 0.627   | 2.065 | -1.656 | -0.012 | 9.77E-02 | 18827 |
| 64  | Parietal_Sup_R       | 0.072  | -0.247 | 0.391 | 0.163 | 0.443  | 0.003  | 6.58E-01 | 18599 | -5.405  | -8.992  | -1.818  | 1.830 | -2.953 | -0.022 | 3.15E-03 | 18827 |
| 65  | Parietal_Inf_L       | -0.130 | -0.601 | 0.340 | 0.240 | -0.543 | -0.004 | 5.87E-01 | 18599 | -8.564  | -13.861 | -3.266  | 2.703 | -3.168 | -0.023 | 1.53E-03 | 18827 |
| 66  | Parietal_Inf_R       | -0.021 | -0.326 | 0.284 | 0.156 | -0.133 | -0.001 | 8.94E-01 | 18599 | -4.549  | -7.985  | -1.114  | 1.753 | -2.595 | -0.019 | 9.46E-03 | 18827 |
| 67  | SupraMarginal_L      | 0.220  | -0.056 | 0.495 | 0.141 | 1.562  | 0.011  | 1.18E-01 | 18599 | -5.344  | -8.448  | -2.239  | 1.584 | -3.374 | -0.025 | 7.43E-04 | 18827 |
| 68  | SupraMarginal_R      | 0.223  | -0.167 | 0.613 | 0.199 | 1.120  | 0.008  | 2.63E-01 | 18599 | -7.119  | -11.517 | -2.721  | 2.244 | -3.173 | -0.023 | 1.51E-03 | 18827 |
| 69  | Angular_L            | -0.074 | -0.345 | 0.197 | 0.138 | -0.538 | -0.004 | 5.91E-01 | 18599 | -4.615  | -7.665  | -1.565  | 1.556 | -2.966 | -0.022 | 3.02E-03 | 18827 |
| 70  | Angular_R            | -0.303 | -0.666 | 0.060 | 0.185 | -1.638 | -0.012 | 1.01E-01 | 18599 | -5.445  | -9.534  | -1.356  | 2.086 | -2.610 | -0.019 | 9.05E-03 | 18827 |
| 71  | Precuneus_L          | -0.213 | -0.873 | 0.447 | 0.337 | -0.634 | -0.005 | 5.26E-01 | 18599 | -8.747  | -16.186 | -1.308  | 3.795 | -2.305 | -0.017 | 2.12E-02 | 18827 |
| 72  | Precuneus_R          | -0.267 | -0.854 | 0.321 | 0.300 | -0.890 | -0.007 | 3.74E-01 | 18599 | -6.891  | -13.517 | -0.266  | 3.380 | -2.039 | -0.015 | 4.15E-02 | 18827 |
| 73  | Paracentral_Lobule_L | -0.075 | -0.377 | 0.227 | 0.154 | -0.489 | -0.004 | 6.25E-01 | 18599 | -1.249  | -4.655  | 2.157   | 1.738 | -0.719 | -0.005 | 4.72E-01 | 18827 |
| 74  | Paracentral_Lobule_R | 0.010  | -0.206 | 0.226 | 0.110 | 0.091  | 0.001  | 9.28E-01 | 18599 | -0.151  | -2.592  | 2.289   | 1.245 | -0.122 | -0.001 | 9.03E-01 | 18827 |
| 75  | Caudate_L            | 0.369  | 0.128  | 0.610 | 0.123 | 3.002  | 0.022  | 2.68E-03 | 18599 | -4.013  | -6.733  | -1.293  | 1.388 | -2.892 | -0.021 | 3.84E-03 | 18827 |
| 76  | Caudate_R            | 0.477  | 0.204  | 0.750 | 0.139 | 3.425  | 0.025  | 6.15E-04 | 18599 | -4.904  | -7.986  | -1.822  | 1.572 | -3.119 | -0.023 | 1.82E-03 | 18827 |
| 77  | Putamen_L            | 0.439  | 0.073  | 0.805 | 0.187 | 2.353  | 0.017  | 1.86E-02 | 18599 | -5.546  | -9.675  | -1.416  | 2.107 | -2.632 | -0.019 | 8.49E-03 | 18827 |
| 78  | Putamen_R            | 0.391  | 0.019  | 0.764 | 0.190 | 2.058  | 0.015  | 3.96E-02 | 18599 | -6.454  | -10.659 | -2.248  | 2.146 | -3.008 | -0.022 | 2.63E-03 | 18827 |
| 79  | Pallidum_L           | 0.020  | -0.012 | 0.053 | 0.017 | 1.211  | 0.009  | 2.26E-01 | 18599 | -0.427  | -0.794  | -0.060  | 0.187 | -2.280 | -0.017 | 2.26E-02 | 18827 |
| 80  | Pallidum_R           | 0.029  | -0.007 | 0.065 | 0.018 | 1.602  | 0.012  | 1.09E-01 | 18599 | -0.667  | -1.070  | -0.264  | 0.206 | -3.246 | -0.024 | 1.17E-03 | 18827 |
| 83  | Heschl_L             | 0.031  | -0.035 | 0.097 | 0.034 | 0.929  | 0.007  | 3.53E-01 | 18599 | -1.264  | -2.008  | -0.520  | 0.380 | -3.329 | -0.024 | 8.75E-04 | 18827 |
| 84  | Heschl_R             | 0.051  | -0.023 | 0.125 | 0.038 | 1.346  | 0.010  | 1.78E-01 | 18599 | -1.907  | -2.738  | -1.075  | 0.424 | -4.494 | -0.033 | 7.03E-06 | 18827 |
| 85  | Temporal_Sup_L       | 0.778  | 0.301  | 1.255 | 0.243 | 3.199  | 0.023  | 1.38E-03 | 18599 | -11.692 | -17.063 | -6.322  | 2.740 | -4.268 | -0.031 | 1.99E-05 | 18827 |
| 86  | Temporal_Sup_R       | 0.340  | -0.187 | 0.867 | 0.269 | 1.264  | 0.009  | 2.06E-01 | 18599 | -14.763 | -20.709 | -8.818  | 3.033 | -4.867 | -0.035 | 1.14E-06 | 18827 |
| 87  | Temporal_Pole_Sup_L  | 0.317  | 0.092  | 0.542 | 0.115 | 2.757  | 0.020  | 5.84E-03 | 18599 | -4.277  | -6.822  | -1.732  | 1.298 | -3.294 | -0.024 | 9.88E-04 | 18827 |
| 88  | Temporal_Pole_Sup_R  | 0.446  | 0.208  | 0.683 | 0.121 | 3.682  | 0.027  | 2.32E-04 | 18599 | -4.708  | -7.385  | -2.030  | 1.366 | -3.446 | -0.025 | 5.70E-04 | 18827 |
| 89  | Temporal_Mid_L       | -0.067 | -0.861 | 0.728 | 0.405 | -0.164 | -0.001 | 8.69E-01 | 18599 | -21.080 | -30.035 | -12.126 | 4.568 | -4.614 | -0.034 | 3.97E-06 | 18827 |
| 90  | Temporal_Mid_R       | 0.176  | -0.530 | 0.882 | 0.360 | 0.488  | 0.004  | 6.26E-01 | 18599 | -13.089 | -21.039 | -5.139  | 4.056 | -3.227 | -0.024 | 1.25E-03 | 18827 |
| 91  | Temporal_Pole_Mid_L  | 0.051  | -0.138 | 0.241 | 0.097 | 0.532  | 0.004  | 5.95E-01 | 18599 | -2.698  | -4.838  | -0.558  | 1.092 | -2.472 | -0.018 | 1.35E-02 | 18827 |
| 92  | Temporal_Pole_Mid_R  | 0.314  | 0.084  | 0.545 | 0.117 | 2.677  | 0.020  | 7.43E-03 | 18599 | -3.404  | -6.001  | -0.806  | 1.325 | -2.568 | -0.019 | 1.02E-02 | 18827 |
| 93  | Temporal_Inf_L       | -0.288 | -0.834 | 0.258 | 0.279 | -1.034 | -0.008 | 3.01E-01 | 18599 | -7.058  | -13.215 | -0.902  | 3.141 | -2.247 | -0.016 | 2.46E-02 | 18827 |
| 94  | Temporal_Inf_R       | 0.177  | -0.419 | 0.773 | 0.304 | 0.582  | 0.004  | 5.61E-01 | 18599 | -4.664  | -11.379 | 2.052   | 3.426 | -1.361 | -0.010 | 1.73E-01 | 18827 |
| 95  | Cerebellum_Crus1_L   | -0.621 | -1.270 | 0.028 | 0.331 | -1.875 | -0.014 | 6.08E-02 | 18599 | 0.968   | -6.348  | 8.284   | 3.733 | 0.259  | 0.002  | 7.95E-01 | 18827 |
| 96  | Cerebellum_Crus1_R   | -0.338 | -1.000 | 0.323 | 0.337 | -1.002 | -0.007 | 3.17E-01 | 18599 | -0.063  | -7.522  | 7.395   | 3.805 | -0.017 | 0.000  | 9.87E-01 | 18827 |
| 97  | Cerebellum_Crus2_L   | -0.292 | -0.807 | 0.222 | 0.262 | -1.115 | -0.008 | 2.65E-01 | 18599 | -6.323  | -12.122 | -0.524  | 2.959 | -2.137 | -0.016 | 3.26E-02 | 18827 |
| 98  | Cerebellum_Crus2_R   | -0.165 | -0.640 | 0.310 | 0.242 | -0.680 | -0.005 | 4.96E-01 | 18599 | -3.073  | -8.435  | 2.288   | 2.735 | -1.124 | -0.008 | 2.61E-01 | 18827 |
| 99  | Cerebellum_3_L       | 0.001  | -0.034 | 0.035 | 0.018 | 0.045  | 0.000  | 9.64E-01 | 18599 | 0.290   | -0.099  | 0.679   | 0.199 | 1.460  | 0.011  | 1.44E-01 | 18827 |
| 100 | Cerebellum_3_R       | -0.014 | -0.060 | 0.033 | 0.024 | -0.571 | -0.004 | 5.68E-01 | 18599 | -0.001  | -0.526  | 0.525   | 0.268 | -0.003 | 0.000  | 9.98E-01 | 18827 |
| 101 | Cerebellum_4_5_L     | -0.003 | -0.282 | 0.276 | 0.142 | -0.019 | 0.000  | 9.85E-01 | 18599 | 2.793   | -0.357  | 5.942   | 1.607 | 1.738  | 0.013  | 8.22E-02 | 18827 |
| 102 | Cerebellum_4_5_R     | 0.058  | -0.169 | 0.285 | 0.116 | 0.500  | 0.004  | 6.17E-01 | 18599 | 0.685   | -1.881  | 3.250   | 1.309 | 0.523  | 0.004  | 6.01E-01 | 18827 |
| 103 | Cerebellum_6_L       | -0.440 | -0.923 | 0.043 | 0.246 | -1.785 | -0.013 | 7.42E-02 | 18599 | 0.043   | -5.404  | 5.490   | 2.779 | 0.015  | 0.000  | 9.88E-01 | 18827 |
| 104 | Cerebellum_6_R       | -0.344 | -0.853 | 0.164 | 0.259 | -1.328 | -0.010 | 1.84E-01 | 18599 | 1.621   | -4.116  | 7.358   | 2.927 | 0.554  | 0.004  | 5.80E-01 | 18827 |
| 105 | Cerebellum_7b_L      | -0.049 | -0.207 | 0.108 | 0.080 | -0.617 | -0.005 | 5.37E-01 | 18599 | -1.184  | -2.957  | 0.590   | 0.905 | -1.308 | -0.010 | 1.91E-01 | 18827 |
| 106 | Cerebellum_7b_R      | -0.046 | -0.202 | 0.109 | 0.079 | -0.580 | -0.004 | 5.62E-01 | 18599 | -1.722  | -3.479  | 0.034   | 0.896 | -1.922 | -0.014 | 5.47E-02 | 18827 |
| 107 | Cerebellum_8_L       | -0.144 | -0.643 | 0.355 | 0.255 | -0.565 | -0.004 | 5.72E-01 | 18599 | 1.425   | -4.210  | 7.060   | 2.875 | 0.496  | 0.004  | 6.20E-01 | 18827 |
| 108 | Cerebellum_8_R       | 0.035  | -0.615 | 0.684 | 0.331 | 0.105  | 0.001  | 9.16E-01 | 18599 | -2.333  | -9.666  | 5.000   | 3.741 | -0.624 | -0.005 | 5.33E-01 | 18827 |
| 109 | Cerebellum_9_L       | -0.116 | -0.398 | 0.166 | 0.144 | -0.807 | -0.006 | 4.20E-01 | 18599 | 0.988   | -2.196  | 4.173   | 1.625 | 0.608  | 0.004  | 5.43E-01 | 18827 |
| 110 | Cerebellum_9_R       | -0.090 | -0.367 | 0.187 | 0.141 | -0.638 | -0.005 | 5.24E-01 | 18599 | 1.824   | -1.307  | 4.954   | 1.597 | 1.142  | 0.008  | 2.54E-01 | 18827 |
| 111 | Cerebellum_10_L      | 0.009  | -0.011 | 0.029 | 0.010 | 0.899  | 0.007  | 3.68E-01 | 18599 | 0.178   | -0.048  | 0.404   | 0.115 | 1.545  | 0.011  | 1.22E-01 | 18827 |
| 112 | Cerebellum_10_R      | 0.017  | -0.004 | 0.037 | 0.011 | 1.558  | 0.011  | 1.19E-01 | 18599 | 0.162   | -0.073  | 0.396   | 0.120 | 1.349  | 0.010  | 1.77E-01 | 18827 |
| 113 | Vermis_1_2           | 0.002  | -0.011 | 0.015 | 0.007 | 0.358  | 0.003  | 7.21E-01 | 18599 | -0.020  | -0.167  | 0.126   | 0.075 | -0.270 | -0.002 | 7.87E-01 | 18827 |

|     |            |        |        |       |       |        |        |          |       |        |        |        |       |        |        |          |       |
|-----|------------|--------|--------|-------|-------|--------|--------|----------|-------|--------|--------|--------|-------|--------|--------|----------|-------|
| 114 | Vermis_3   | 0.020  | -0.032 | 0.072 | 0.026 | 0.758  | 0.006  | 4.49E-01 | 18599 | -0.100 | -0.684 | 0.483  | 0.298 | -0.336 | -0.002 | 7.37E-01 | 18827 |
| 115 | Vermis_4_5 | 0.090  | -0.062 | 0.242 | 0.078 | 1.164  | 0.009  | 2.44E-01 | 18599 | 1.682  | -0.032 | 3.397  | 0.875 | 1.923  | 0.014  | 5.45E-02 | 18827 |
| 116 | Vermis_6   | -0.035 | -0.119 | 0.050 | 0.043 | -0.805 | -0.006 | 4.21E-01 | 18599 | 0.709  | -0.246 | 1.664  | 0.487 | 1.455  | 0.011  | 1.46E-01 | 18827 |
| 117 | Vermis_7   | -0.003 | -0.051 | 0.045 | 0.024 | -0.125 | -0.001 | 9.01E-01 | 18599 | 0.303  | -0.237 | 0.843  | 0.275 | 1.101  | 0.008  | 2.71E-01 | 18827 |
| 118 | Vermis_8   | -0.040 | -0.119 | 0.039 | 0.040 | -0.999 | -0.007 | 3.18E-01 | 18599 | 0.301  | -0.586 | 1.189  | 0.453 | 0.665  | 0.005  | 5.06E-01 | 18827 |
| 119 | Vermis_9   | -0.030 | -0.094 | 0.034 | 0.033 | -0.928 | -0.007 | 3.53E-01 | 18599 | 0.327  | -0.393 | 1.047  | 0.367 | 0.890  | 0.006  | 3.73E-01 | 18827 |
| 120 | Vermis_10  | -0.001 | -0.019 | 0.016 | 0.009 | -0.151 | -0.001 | 8.80E-01 | 18599 | 0.149  | -0.052 | 0.349  | 0.102 | 1.454  | 0.011  | 1.46E-01 | 18827 |
| 121 | Thal_AV_L  | 0.010  | 0.003  | 0.017 | 0.004 | 2.709  | 0.020  | 6.76E-03 | 18599 | -0.100 | -0.180 | -0.019 | 0.041 | -2.432 | -0.018 | 1.50E-02 | 18827 |
| 122 | Thal_AV_R  | 0.010  | 0.000  | 0.020 | 0.005 | 1.916  | 0.014  | 5.53E-02 | 18599 | -0.176 | -0.290 | -0.061 | 0.058 | -3.007 | -0.022 | 2.64E-03 | 18827 |
| 123 | Thal_LP_L  | 0.012  | 0.004  | 0.020 | 0.004 | 3.073  | 0.023  | 2.12E-03 | 18599 | -0.163 | -0.252 | -0.074 | 0.045 | -3.585 | -0.026 | 3.38E-04 | 18827 |
| 124 | Thal_LP_R  | 0.008  | -0.002 | 0.018 | 0.005 | 1.503  | 0.011  | 1.33E-01 | 18599 | -0.253 | -0.369 | -0.137 | 0.059 | -4.277 | -0.031 | 1.90E-05 | 18827 |
| 125 | Thal_VA_L  | 0.005  | -0.004 | 0.013 | 0.004 | 1.092  | 0.008  | 2.75E-01 | 18599 | -0.051 | -0.146 | 0.044  | 0.048 | -1.059 | -0.008 | 2.90E-01 | 18827 |
| 126 | Thal_VA_R  | 0.007  | -0.003 | 0.017 | 0.005 | 1.302  | 0.010  | 1.93E-01 | 18599 | -0.101 | -0.218 | 0.015  | 0.059 | -1.708 | -0.012 | 8.77E-02 | 18827 |
| 127 | Thal_VL_L  | 0.055  | 0.031  | 0.079 | 0.012 | 4.506  | 0.033  | 6.64E-06 | 18599 | -0.392 | -0.663 | -0.122 | 0.138 | -2.847 | -0.021 | 4.41E-03 | 18827 |
| 128 | Thal_VL_R  | 0.050  | 0.018  | 0.082 | 0.016 | 3.086  | 0.023  | 2.03E-03 | 18599 | -0.664 | -1.022 | -0.305 | 0.183 | -3.630 | -0.026 | 2.84E-04 | 18827 |
| 129 | Thal_VPL_L | 0.024  | -0.005 | 0.052 | 0.015 | 1.627  | 0.012  | 1.04E-01 | 18599 | -0.576 | -0.897 | -0.255 | 0.164 | -3.514 | -0.026 | 4.42E-04 | 18827 |
| 130 | Thal_VPL_R | 0.008  | -0.022 | 0.038 | 0.015 | 0.519  | 0.004  | 6.04E-01 | 18599 | -0.644 | -0.981 | -0.306 | 0.172 | -3.734 | -0.027 | 1.89E-04 | 18827 |
| 131 | Thal_IL_L  | 0.017  | 0.004  | 0.029 | 0.006 | 2.665  | 0.020  | 7.71E-03 | 18599 | -0.387 | -0.526 | -0.248 | 0.071 | -5.455 | -0.040 | 4.95E-08 | 18827 |
| 132 | Thal_IL_R  | 0.013  | -0.001 | 0.027 | 0.007 | 1.880  | 0.014  | 6.01E-02 | 18599 | -0.412 | -0.570 | -0.254 | 0.080 | -5.121 | -0.037 | 3.06E-07 | 18827 |
| 133 | Thal_Re_L  | 0.000  | 0.000  | 0.000 | 0.000 | 0.609  | 0.004  | 5.42E-01 | 18599 | 0.000  | -0.001 | 0.000  | 0.000 | -0.984 | -0.007 | 3.25E-01 | 18827 |
| 134 | Thal_Re_R  | 0.000  | 0.000  | 0.001 | 0.000 | 1.399  | 0.010  | 1.62E-01 | 18599 | -0.006 | -0.011 | -0.001 | 0.002 | -2.555 | -0.019 | 1.06E-02 | 18827 |
| 135 | Thal_MDm_L | 0.119  | 0.027  | 0.210 | 0.047 | 2.547  | 0.019  | 1.09E-02 | 18599 | -2.787 | -3.817 | -1.757 | 0.525 | -5.305 | -0.039 | 1.14E-07 | 18827 |
| 136 | Thal_MDm_R | 0.097  | -0.009 | 0.203 | 0.054 | 1.799  | 0.013  | 7.20E-02 | 18599 | -3.040 | -4.237 | -1.843 | 0.611 | -4.979 | -0.036 | 6.44E-07 | 18827 |
| 137 | Thal_MDL_L | 0.030  | 0.014  | 0.045 | 0.008 | 3.665  | 0.027  | 2.48E-04 | 18599 | -0.489 | -0.667 | -0.311 | 0.091 | -5.376 | -0.039 | 7.70E-08 | 18827 |
| 138 | Thal_MDL_R | 0.020  | 0.002  | 0.038 | 0.009 | 2.173  | 0.016  | 2.98E-02 | 18599 | -0.527 | -0.730 | -0.325 | 0.103 | -5.100 | -0.037 | 3.43E-07 | 18827 |
| 139 | Thal_LGN_L | 0.002  | 0.000  | 0.005 | 0.001 | 1.805  | 0.013  | 7.11E-02 | 18599 | -0.051 | -0.078 | -0.024 | 0.014 | -3.716 | -0.027 | 2.03E-04 | 18827 |
| 140 | Thal_LGN_R | 0.005  | 0.000  | 0.010 | 0.003 | 1.958  | 0.014  | 5.02E-02 | 18599 | -0.135 | -0.192 | -0.077 | 0.029 | -4.587 | -0.033 | 4.53E-06 | 18827 |
| 141 | Thal_MGN_L | 0.001  | -0.003 | 0.005 | 0.002 | 0.506  | 0.004  | 6.13E-01 | 18599 | -0.113 | -0.161 | -0.064 | 0.025 | -4.569 | -0.033 | 4.94E-06 | 18827 |
| 142 | Thal_MGN_R | 0.001  | -0.004 | 0.006 | 0.002 | 0.394  | 0.003  | 6.94E-01 | 18599 | -0.139 | -0.191 | -0.086 | 0.027 | -5.174 | -0.038 | 2.31E-07 | 18827 |
| 143 | Thal_PuA_L | 0.002  | -0.003 | 0.007 | 0.003 | 0.620  | 0.005  | 5.36E-01 | 18599 | -0.155 | -0.212 | -0.098 | 0.029 | -5.322 | -0.039 | 1.04E-07 | 18827 |
| 144 | Thal_PuA_R | 0.003  | -0.008 | 0.013 | 0.005 | 0.515  | 0.004  | 6.07E-01 | 18599 | -0.332 | -0.451 | -0.214 | 0.060 | -5.490 | -0.040 | 4.06E-08 | 18827 |
| 145 | Thal_PuM_L | 0.051  | -0.049 | 0.152 | 0.051 | 1.000  | 0.007  | 3.17E-01 | 18599 | -2.956 | -4.090 | -1.823 | 0.578 | -5.112 | -0.037 | 3.22E-07 | 18827 |
| 146 | Thal_PuM_R | 0.041  | -0.084 | 0.167 | 0.064 | 0.649  | 0.005  | 5.16E-01 | 18599 | -3.761 | -5.173 | -2.348 | 0.721 | -5.219 | -0.038 | 1.82E-07 | 18827 |
| 147 | Thal_PuL_L | 0.013  | -0.005 | 0.031 | 0.009 | 1.402  | 0.010  | 1.61E-01 | 18599 | -0.538 | -0.744 | -0.331 | 0.106 | -5.095 | -0.037 | 3.52E-07 | 18827 |
| 148 | Thal_PuL_R | 0.010  | -0.019 | 0.039 | 0.015 | 0.675  | 0.005  | 4.99E-01 | 18599 | -0.841 | -1.170 | -0.512 | 0.168 | -5.013 | -0.037 | 5.41E-07 | 18827 |
| 149 | Thal_PuL_L | 0.001  | -0.004 | 0.006 | 0.003 | 0.579  | 0.004  | 5.63E-01 | 18599 | -0.080 | -0.137 | -0.024 | 0.029 | -2.795 | -0.020 | 5.19E-03 | 18827 |
| 150 | Thal_PuL_R | -0.002 | -0.008 | 0.005 | 0.003 | -0.525 | -0.004 | 6.00E-01 | 18599 | -0.109 | -0.183 | -0.034 | 0.038 | -2.858 | -0.021 | 4.27E-03 | 18827 |
| 151 | ACC_sub_L  | -0.006 | -0.064 | 0.052 | 0.029 | -0.203 | -0.001 | 8.39E-01 | 18599 | -0.955 | -1.604 | -0.306 | 0.331 | -2.883 | -0.021 | 3.94E-03 | 18827 |
| 152 | ACC_sub_R  | -0.003 | -0.056 | 0.051 | 0.027 | -0.095 | -0.001 | 9.24E-01 | 18599 | -0.750 | -1.356 | -0.144 | 0.309 | -2.425 | -0.018 | 1.53E-02 | 18827 |
| 153 | ACC_pre_L  | 0.069  | -0.079 | 0.216 | 0.075 | 0.914  | 0.007  | 3.61E-01 | 18599 | -2.727 | -4.391 | -1.064 | 0.849 | -3.214 | -0.023 | 1.31E-03 | 18827 |
| 154 | ACC_pre_R  | 0.026  | -0.116 | 0.168 | 0.072 | 0.363  | 0.003  | 7.16E-01 | 18599 | -2.851 | -4.453 | -1.249 | 0.817 | -3.488 | -0.025 | 4.88E-04 | 18827 |
| 155 | ACC_sup_L  | 0.171  | 0.011  | 0.331 | 0.082 | 2.088  | 0.015  | 3.68E-02 | 18599 | -2.757 | -4.564 | -0.949 | 0.922 | -2.989 | -0.022 | 2.80E-03 | 18827 |
| 156 | ACC_sup_R  | 0.065  | -0.101 | 0.231 | 0.085 | 0.767  | 0.006  | 4.43E-01 | 18599 | -3.022 | -4.895 | -1.149 | 0.956 | -3.163 | -0.023 | 1.57E-03 | 18827 |
| 157 | N_Acc_L    | 0.060  | 0.012  | 0.108 | 0.025 | 2.430  | 0.018  | 1.51E-02 | 18599 | -0.797 | -1.342 | -0.253 | 0.278 | -2.869 | -0.021 | 4.12E-03 | 18827 |
| 158 | N_Acc_R    | 0.052  | 0.010  | 0.094 | 0.021 | 2.437  | 0.018  | 1.48E-02 | 18599 | -0.863 | -1.334 | -0.392 | 0.240 | -3.592 | -0.026 | 3.28E-04 | 18827 |
| 159 | VTA_L      | 0.001  | -0.001 | 0.003 | 0.001 | 1.138  | 0.008  | 2.55E-01 | 18599 | -0.001 | -0.020 | 0.018  | 0.010 | -0.084 | -0.001 | 9.33E-01 | 18827 |
| 160 | VTA_R      | 0.001  | 0.000  | 0.003 | 0.001 | 1.331  | 0.010  | 1.83E-01 | 18599 | -0.006 | -0.023 | 0.011  | 0.009 | -0.709 | -0.005 | 4.78E-01 | 18827 |
| 161 | SN_pc_L    | 0.001  | -0.001 | 0.004 | 0.001 | 1.072  | 0.008  | 2.84E-01 | 18599 | -0.028 | -0.059 | 0.002  | 0.016 | -1.817 | -0.013 | 6.92E-02 | 18827 |
| 162 | SN_pc_R    | 0.004  | 0.000  | 0.007 | 0.002 | 2.108  | 0.015  | 3.51E-02 | 18599 | -0.053 | -0.093 | -0.013 | 0.021 | -2.580 | -0.019 | 9.89E-03 | 18827 |

|     |         |       |        |       |       |       |       |          |       |        |        |        |       |        |        |          |       |
|-----|---------|-------|--------|-------|-------|-------|-------|----------|-------|--------|--------|--------|-------|--------|--------|----------|-------|
| 163 | SN_pr_L | 0.003 | 0.000  | 0.007 | 0.002 | 1.830 | 0.013 | 6.72E-02 | 18599 | -0.038 | -0.080 | 0.004  | 0.021 | -1.791 | -0.013 | 7.33E-02 | 18827 |
| 164 | SN_pr_R | 0.006 | 0.002  | 0.010 | 0.002 | 2.676 | 0.020 | 7.45E-03 | 18599 | -0.051 | -0.098 | -0.004 | 0.024 | -2.117 | -0.015 | 3.43E-02 | 18827 |
| 165 | Red_N_L | 0.003 | -0.001 | 0.008 | 0.002 | 1.417 | 0.010 | 1.56E-01 | 18599 | -0.072 | -0.124 | -0.020 | 0.026 | -2.739 | -0.020 | 6.16E-03 | 18827 |
| 166 | Red_N_R | 0.005 | 0.000  | 0.010 | 0.003 | 1.861 | 0.014 | 6.27E-02 | 18599 | -0.050 | -0.106 | 0.006  | 0.029 | -1.759 | -0.013 | 7.86E-02 | 18827 |
| 167 | LC_L    | 0.001 | -0.001 | 0.003 | 0.001 | 1.204 | 0.009 | 2.29E-01 | 18599 | -0.001 | -0.020 | 0.019  | 0.010 | -0.071 | -0.001 | 9.43E-01 | 18827 |
| 168 | LC_R    | 0.001 | -0.001 | 0.003 | 0.001 | 1.205 | 0.009 | 2.28E-01 | 18599 | 0.000  | -0.021 | 0.021  | 0.011 | 0.007  | 0.000  | 9.95E-01 | 18827 |
| 169 | Raphe_D | 0.003 | -0.004 | 0.009 | 0.003 | 0.805 | 0.006 | 4.21E-01 | 18599 | -0.093 | -0.167 | -0.018 | 0.038 | -2.436 | -0.018 | 1.49E-02 | 18827 |
| 170 | Raphe_M | 0.002 | 0.000  | 0.004 | 0.001 | 1.682 | 0.012 | 9.25E-02 | 18599 | -0.004 | -0.026 | 0.019  | 0.012 | -0.321 | -0.002 | 7.48E-01 | 18827 |

| Oily fish intake |                      |          |          |         |        |        |        |          |       | Cheese intake |          |         |        |        |        |          |       |
|------------------|----------------------|----------|----------|---------|--------|--------|--------|----------|-------|---------------|----------|---------|--------|--------|--------|----------|-------|
| Number           | AAL 3 region         | beta     | 95%CI l  | 95%CI h | se     | t      | r      | p        | df.e  | beta          | 95%CI l  | 95%CI h | se     | t      | r      | p        | df.e  |
| 0                | Total brain          | -155.729 | -305.500 | -5.958  | 76.410 | -2.038 | -0.015 | 4.16E-02 | 18842 | 0.163         | -126.741 | 127.068 | 64.744 | 0.003  | 0.000  | 9.98E-01 | 18590 |
| 1                | Precentral_L         | -2.718   | -7.982   | 2.547   | 2.686  | -1.012 | -0.007 | 3.12E-01 | 18842 | -2.900        | -7.360   | 1.559   | 2.275  | -1.275 | -0.009 | 2.02E-01 | 18590 |
| 2                | Precentral_R         | -2.806   | -7.632   | 2.020   | 2.462  | -1.140 | -0.008 | 2.54E-01 | 18842 | -1.818        | -5.902   | 2.266   | 2.083  | -0.873 | -0.006 | 3.83E-01 | 18590 |
| 3                | Frontal_Sup_2_L      | -2.305   | -7.868   | 3.257   | 2.838  | -0.812 | -0.006 | 4.17E-01 | 18842 | 2.868         | -1.839   | 7.576   | 2.401  | 1.194  | 0.009  | 2.32E-01 | 18590 |
| 4                | Frontal_Sup_2_R      | -4.411   | -10.541  | 1.718   | 3.127  | -1.411 | -0.010 | 1.58E-01 | 18842 | 1.344         | -3.847   | 6.536   | 2.649  | 0.508  | 0.004  | 6.12E-01 | 18590 |
| 5                | Frontal_Mid_2_L      | -3.993   | -9.833   | 1.846   | 2.979  | -1.340 | -0.010 | 1.80E-01 | 18842 | 3.172         | -1.778   | 8.122   | 2.526  | 1.256  | 0.009  | 2.09E-01 | 18590 |
| 6                | Frontal_Mid_2_R      | -7.229   | -13.839  | -0.618  | 3.372  | -2.143 | -0.016 | 3.21E-02 | 18842 | 1.171         | -4.424   | 6.766   | 2.855  | 0.410  | 0.003  | 6.82E-01 | 18590 |
| 7                | Frontal_Inf_Oper_L   | -1.849   | -3.574   | -0.124  | 0.880  | -2.101 | -0.015 | 3.57E-02 | 18842 | 1.616         | 0.155    | 3.077   | 0.746  | 2.168  | 0.016  | 3.02E-02 | 18590 |
| 8                | Frontal_Inf_Oper_R   | -1.727   | -3.891   | 0.437   | 1.104  | -1.565 | -0.011 | 1.18E-01 | 18842 | 1.875         | 0.042    | 3.708   | 0.935  | 2.005  | 0.015  | 4.50E-02 | 18590 |
| 9                | Frontal_Inf_Tri_L    | -2.995   | -6.657   | 0.668   | 1.869  | -1.603 | -0.012 | 1.09E-01 | 18842 | 5.918         | 2.817    | 9.020   | 1.582  | 3.740  | 0.027  | 1.84E-04 | 18590 |
| 10               | Frontal_Inf_Tri_R    | -0.071   | -2.949   | 2.807   | 1.468  | -0.048 | 0.000  | 9.62E-01 | 18842 | 4.435         | 1.995    | 6.874   | 1.245  | 3.563  | 0.026  | 3.67E-04 | 18590 |
| 11               | Frontal_Inf_Orb_2_L  | -0.698   | -1.793   | 0.398   | 0.559  | -1.248 | -0.009 | 2.12E-01 | 18842 | 2.281         | 1.353    | 3.210   | 0.474  | 4.815  | 0.035  | 1.48E-06 | 18590 |
| 12               | Frontal_Inf_Orb_2_R  | -0.452   | -1.597   | 0.694   | 0.584  | -0.773 | -0.006 | 4.40E-01 | 18842 | 2.837         | 1.866    | 3.807   | 0.495  | 5.731  | 0.042  | 1.02E-08 | 18590 |
| 13               | Rolandic_Oper_L      | -1.048   | -2.705   | 0.609   | 0.845  | -1.240 | -0.009 | 2.15E-01 | 18842 | 1.322         | -0.083   | 2.726   | 0.717  | 1.844  | 0.014  | 6.52E-02 | 18590 |
| 14               | Rolandic_Oper_R      | 0.166    | -2.204   | 2.537   | 1.209  | 0.137  | 0.001  | 8.91E-01 | 18842 | 0.050         | -1.960   | 2.060   | 1.025  | 0.049  | 0.000  | 9.61E-01 | 18590 |
| 15               | Supp_Motor_Area_L    | -1.420   | -5.361   | 2.521   | 2.011  | -0.706 | -0.005 | 4.80E-01 | 18842 | -4.014        | -7.347   | -0.682  | 1.700  | -2.361 | -0.017 | 1.82E-02 | 18590 |
| 16               | Supp_Motor_Area_R    | 0.168    | -4.186   | 4.522   | 2.221  | 0.076  | 0.001  | 9.40E-01 | 18842 | -2.903        | -6.585   | 0.779   | 1.879  | -1.545 | -0.011 | 1.22E-01 | 18590 |
| 17               | Olfactory_L          | -0.039   | -0.624   | 0.547   | 0.299  | -0.130 | -0.001 | 8.97E-01 | 18842 | 0.392         | -0.105   | 0.888   | 0.253  | 1.545  | 0.011  | 1.22E-01 | 18590 |
| 18               | Olfactory_R          | -0.127   | -0.714   | 0.460   | 0.300  | -0.424 | -0.003 | 6.71E-01 | 18842 | 0.469         | -0.028   | 0.967   | 0.254  | 1.849  | 0.014  | 6.45E-02 | 18590 |
| 19               | Frontal_Sup_Medial_L | -2.253   | -5.947   | 1.442   | 1.885  | -1.195 | -0.009 | 2.32E-01 | 18842 | 3.529         | 0.400    | 6.657   | 1.596  | 2.211  | 0.016  | 2.71E-02 | 18590 |
| 20               | Frontal_Sup_Medial_R | -1.629   | -4.317   | 1.059   | 1.371  | -1.188 | -0.009 | 2.35E-01 | 18842 | 0.625         | -1.652   | 2.902   | 1.162  | 0.538  | 0.004  | 5.91E-01 | 18590 |
| 21               | Frontal_Med_Orb_L    | -1.003   | -2.383   | 0.377   | 0.704  | -1.425 | -0.010 | 1.54E-01 | 18842 | 1.207         | 0.038    | 2.376   | 0.596  | 2.024  | 0.015  | 4.30E-02 | 18590 |
| 22               | Frontal_Med_Orb_R    | -0.561   | -2.257   | 1.135   | 0.865  | -0.649 | -0.005 | 5.17E-01 | 18842 | 1.644         | 0.208    | 3.081   | 0.733  | 2.243  | 0.016  | 2.49E-02 | 18590 |
| 23               | Rectus_L             | -1.195   | -2.624   | 0.233   | 0.729  | -1.641 | -0.012 | 1.01E-01 | 18842 | 1.404         | 0.193    | 2.614   | 0.618  | 2.273  | 0.017  | 2.31E-02 | 18590 |
| 24               | Rectus_R             | -0.371   | -1.692   | 0.951   | 0.674  | -0.550 | -0.004 | 5.83E-01 | 18842 | 1.461         | 0.342    | 2.581   | 0.571  | 2.558  | 0.019  | 1.05E-02 | 18590 |
| 25               | OFCmed_L             | -0.693   | -1.521   | 0.135   | 0.422  | -1.640 | -0.012 | 1.01E-01 | 18842 | 0.138         | -0.564   | 0.840   | 0.358  | 0.384  | 0.003  | 7.01E-01 | 18590 |
| 26               | OFCmed_R             | 0.006    | -0.959   | 0.970   | 0.492  | 0.011  | 0.000  | 9.91E-01 | 18842 | 0.337         | -0.481   | 1.155   | 0.417  | 0.807  | 0.006  | 4.20E-01 | 18590 |
| 27               | OFCant_L             | -0.826   | -1.783   | 0.131   | 0.488  | -1.693 | -0.012 | 9.05E-02 | 18842 | -0.256        | -1.067   | 0.556   | 0.414  | -0.618 | -0.005 | 5.37E-01 | 18590 |
| 28               | OFCant_R             | -0.888   | -2.152   | 0.376   | 0.645  | -1.377 | -0.010 | 1.69E-01 | 18842 | 0.764         | -0.308   | 1.836   | 0.547  | 1.397  | 0.010  | 1.62E-01 | 18590 |
| 29               | OFCpost_L            | -0.743   | -1.940   | 0.455   | 0.611  | -1.215 | -0.009 | 2.24E-01 | 18842 | 0.094         | -0.922   | 1.110   | 0.518  | 0.181  | 0.001  | 8.57E-01 | 18590 |
| 30               | OFCpost_R            | -0.941   | -2.048   | 0.166   | 0.565  | -1.666 | -0.012 | 9.58E-02 | 18842 | 0.416         | -0.522   | 1.354   | 0.479  | 0.869  | 0.006  | 3.85E-01 | 18590 |
| 31               | OFClat_L             | -0.100   | -0.504   | 0.304   | 0.206  | -0.484 | -0.004 | 6.28E-01 | 18842 | 0.811         | 0.468    | 1.154   | 0.175  | 4.639  | 0.034  | 3.52E-06 | 18590 |
| 32               | OFClat_R             | -0.177   | -0.518   | 0.164   | 0.174  | -1.016 | -0.007 | 3.10E-01 | 18842 | 0.735         | 0.446    | 1.024   | 0.148  | 4.980  | 0.037  | 6.40E-07 | 18590 |
| 33               | Insula_L             | -5.642   | -9.346   | -1.938  | 1.890  | -2.986 | -0.022 | 2.83E-03 | 18842 | 3.166         | 0.027    | 6.305   | 1.602  | 1.977  | 0.014  | 4.81E-02 | 18590 |
| 34               | Insula_R             | -4.540   | -8.150   | -0.930  | 1.842  | -2.465 | -0.018 | 1.37E-02 | 18842 | 3.709         | 0.648    | 6.769   | 1.561  | 2.375  | 0.017  | 1.76E-02 | 18590 |
| 37               | Cingulate_Mid_L      | -2.491   | -5.628   | 0.646   | 1.600  | -1.557 | -0.011 | 1.20E-01 | 18842 | -1.022        | -3.679   | 1.635   | 1.355  | -0.754 | -0.006 | 4.51E-01 | 18590 |
| 38               | Cingulate_Mid_R      | -3.145   | -6.488   | 0.198   | 1.706  | -1.844 | -0.013 | 6.52E-02 | 18842 | -1.884        | -4.715   | 0.947   | 1.444  | -1.304 | -0.010 | 1.92E-01 | 18590 |
| 39               | Cingulate_Post_L     | -1.079   | -2.036   | -0.122  | 0.488  | -2.211 | -0.016 | 2.71E-02 | 18842 | -0.705        | -1.515   | 0.105   | 0.413  | -1.705 | -0.013 | 8.81E-02 | 18590 |
| 40               | Cingulate_Post_R     | -0.606   | -1.137   | -0.075  | 0.271  | -2.238 | -0.016 | 2.52E-02 | 18842 | -0.571        | -1.020   | -0.121  | 0.229  | -2.487 | -0.018 | 1.29E-02 | 18590 |

|    |                      |        |         |        |       |        |        |          |       |         |         |        |       |        |        |          |       |
|----|----------------------|--------|---------|--------|-------|--------|--------|----------|-------|---------|---------|--------|-------|--------|--------|----------|-------|
| 41 | Hippocampus_L        | 0.465  | -1.082  | 2.012  | 0.789 | 0.589  | 0.004  | 5.56E-01 | 18842 | 0.686   | -0.626  | 1.999  | 0.670 | 1.025  | 0.008  | 3.05E-01 | 18590 |
| 42 | Hippocampus_R        | 1.501  | -0.104  | 3.106  | 0.819 | 1.833  | 0.013  | 6.68E-02 | 18842 | 0.954   | -0.408  | 2.315  | 0.695 | 1.373  | 0.010  | 1.70E-01 | 18590 |
| 43 | ParaHippocampa_L     | -0.063 | -1.438  | 1.311  | 0.701 | -0.090 | -0.001 | 9.28E-01 | 18842 | 0.604   | -0.561  | 1.769  | 0.594 | 1.016  | 0.007  | 3.09E-01 | 18590 |
| 44 | ParaHippocampa_R     | 0.254  | -1.482  | 1.990  | 0.886 | 0.287  | 0.002  | 7.74E-01 | 18842 | 0.934   | -0.536  | 2.405  | 0.750 | 1.246  | 0.009  | 2.13E-01 | 18590 |
| 45 | Amygdala_L           | -0.698 | -1.232  | -0.163 | 0.272 | -2.560 | -0.019 | 1.05E-02 | 18842 | 0.402   | -0.050  | 0.855  | 0.231 | 1.743  | 0.013  | 8.14E-02 | 18590 |
| 46 | Amygdala_R           | -0.727 | -1.274  | -0.181 | 0.279 | -2.608 | -0.019 | 9.12E-03 | 18842 | 0.224   | -0.239  | 0.688  | 0.236 | 0.949  | 0.007  | 3.43E-01 | 18590 |
| 47 | Calcarine_L          | -0.507 | -5.603  | 4.590  | 2.600 | -0.195 | -0.001 | 8.45E-01 | 18842 | -12.257 | -16.576 | -7.939 | 2.203 | -5.563 | -0.041 | 2.68E-08 | 18590 |
| 48 | Calcarine_R          | -1.104 | -5.363  | 3.154  | 2.173 | -0.508 | -0.004 | 6.11E-01 | 18842 | -9.123  | -12.729 | -5.517 | 1.840 | -4.959 | -0.036 | 7.14E-07 | 18590 |
| 49 | Cuneus_L             | 0.283  | -2.918  | 3.483  | 1.633 | 0.173  | 0.001  | 8.63E-01 | 18842 | -6.879  | -9.590  | -4.168 | 1.383 | -4.973 | -0.036 | 6.64E-07 | 18590 |
| 50 | Cuneus_R             | -1.570 | -4.018  | 0.877  | 1.249 | -1.257 | -0.009 | 2.09E-01 | 18842 | -4.814  | -6.887  | -2.740 | 1.058 | -4.550 | -0.033 | 5.39E-06 | 18590 |
| 51 | Lingua_L             | -1.124 | -4.192  | 1.943  | 1.565 | -0.719 | -0.005 | 4.72E-01 | 18842 | -3.514  | -6.115  | -0.912 | 1.327 | -2.648 | -0.019 | 8.12E-03 | 18590 |
| 52 | Lingua_R             | 0.043  | -3.170  | 3.257  | 1.639 | 0.026  | 0.000  | 9.79E-01 | 18842 | -4.295  | -7.017  | -1.572 | 1.389 | -3.092 | -0.023 | 1.99E-03 | 18590 |
| 53 | Occipital_Sup_L      | -0.210 | -2.319  | 1.899  | 1.076 | -0.195 | -0.001 | 8.45E-01 | 18842 | -2.185  | -3.972  | -0.398 | 0.912 | -2.397 | -0.018 | 1.65E-02 | 18590 |
| 54 | Occipital_Sup_R      | -1.383 | -3.668  | 0.903  | 1.166 | -1.186 | -0.009 | 2.36E-01 | 18842 | -0.745  | -2.681  | 1.192  | 0.988 | -0.754 | -0.006 | 4.51E-01 | 18590 |
| 55 | Occipital_Mid_L      | 0.211  | -4.730  | 5.152  | 2.521 | 0.084  | 0.001  | 9.33E-01 | 18842 | -4.166  | -8.348  | 0.016  | 2.134 | -1.952 | -0.014 | 5.09E-02 | 18590 |
| 56 | Occipital_Mid_R      | -3.778 | -7.217  | -0.339 | 1.755 | -2.153 | -0.016 | 3.13E-02 | 18842 | -1.819  | -4.733  | 1.095  | 1.487 | -1.224 | -0.009 | 2.21E-01 | 18590 |
| 57 | Occipital_Inf_L      | -0.820 | -2.459  | 0.819  | 0.836 | -0.981 | -0.007 | 3.27E-01 | 18842 | -2.768  | -4.156  | -1.380 | 0.708 | -3.909 | -0.029 | 9.29E-05 | 18590 |
| 58 | Occipital_Inf_R      | -3.354 | -5.248  | -1.459 | 0.967 | -3.470 | -0.025 | 5.22E-04 | 18842 | -3.354  | -4.960  | -1.749 | 0.819 | -4.095 | -0.030 | 4.24E-05 | 18590 |
| 59 | Fusiform_L           | -1.264 | -4.854  | 2.325  | 1.831 | -0.690 | -0.005 | 4.90E-01 | 18842 | -1.021  | -4.057  | 2.016  | 1.549 | -0.659 | -0.005 | 5.10E-01 | 18590 |
| 60 | Fusiform_R           | -0.343 | -4.288  | 3.601  | 2.012 | -0.171 | -0.001 | 8.65E-01 | 18842 | 2.133   | -1.210  | 5.476  | 1.706 | 1.251  | 0.009  | 2.11E-01 | 18590 |
| 61 | Postcentral_L        | 1.743  | -3.659  | 7.145  | 2.756 | 0.632  | 0.005  | 5.27E-01 | 18842 | 7.468   | 2.901   | 12.036 | 2.330 | 3.205  | 0.024  | 1.35E-03 | 18590 |
| 62 | Postcentral_R        | 1.746  | -3.786  | 7.279  | 2.822 | 0.619  | 0.005  | 5.36E-01 | 18842 | 4.301   | -0.379  | 8.982  | 2.388 | 1.801  | 0.013  | 7.17E-02 | 18590 |
| 63 | Parietal_Sup_L       | -2.228 | -5.340  | 0.885  | 1.588 | -1.403 | -0.010 | 1.61E-01 | 18842 | -3.039  | -5.675  | -0.402 | 1.345 | -2.259 | -0.017 | 2.39E-02 | 18590 |
| 64 | Parietal_Sup_R       | -0.163 | -2.922  | 2.597  | 1.408 | -0.116 | -0.001 | 9.08E-01 | 18842 | -2.632  | -4.968  | -0.295 | 1.192 | -2.208 | -0.016 | 2.73E-02 | 18590 |
| 65 | Parietal_Inf_L       | -3.987 | -8.061  | 0.086  | 2.078 | -1.919 | -0.014 | 5.51E-02 | 18842 | 0.224   | -3.225  | 3.674  | 1.760 | 0.127  | 0.001  | 8.99E-01 | 18590 |
| 66 | Parietal_Inf_R       | -1.196 | -3.837  | 1.445  | 1.347 | -0.887 | -0.006 | 3.75E-01 | 18842 | -0.646  | -2.880  | 1.588  | 1.140 | -0.567 | -0.004 | 5.71E-01 | 18590 |
| 67 | SupraMarginal_L      | -1.544 | -3.931  | 0.843  | 1.218 | -1.268 | -0.009 | 2.05E-01 | 18842 | 2.435   | 0.413   | 4.458  | 1.032 | 2.360  | 0.017  | 1.83E-02 | 18590 |
| 68 | SupraMarginal_R      | -1.673 | -5.054  | 1.708  | 1.725 | -0.970 | -0.007 | 3.32E-01 | 18842 | 3.727   | 0.865   | 6.590  | 1.460 | 2.552  | 0.019  | 1.07E-02 | 18590 |
| 69 | Angular_L            | -0.285 | -2.631  | 2.062  | 1.197 | -0.238 | -0.002 | 8.12E-01 | 18842 | -0.126  | -2.114  | 1.863  | 1.014 | -0.124 | -0.001 | 9.01E-01 | 18590 |
| 70 | Angular_R            | -0.567 | -3.711  | 2.577  | 1.604 | -0.353 | -0.003 | 7.24E-01 | 18842 | -1.011  | -3.676  | 1.655  | 1.360 | -0.743 | -0.005 | 4.57E-01 | 18590 |
| 71 | Precuneus_L          | -3.325 | -9.046  | 2.396  | 2.919 | -1.139 | -0.008 | 2.55E-01 | 18842 | -6.195  | -11.039 | -1.351 | 2.471 | -2.507 | -0.018 | 1.22E-02 | 18590 |
| 72 | Precuneus_R          | -6.062 | -11.156 | -0.969 | 2.599 | -2.333 | -0.017 | 1.97E-02 | 18842 | -6.633  | -10.951 | -2.315 | 2.203 | -3.011 | -0.022 | 2.61E-03 | 18590 |
| 73 | Paracentral_Lobule_L | 0.154  | -2.464  | 2.772  | 1.336 | 0.115  | 0.001  | 9.08E-01 | 18842 | -3.062  | -5.278  | -0.847 | 1.130 | -2.710 | -0.020 | 6.74E-03 | 18590 |
| 74 | Paracentral_Lobule_R | -0.321 | -2.196  | 1.554  | 0.957 | -0.336 | -0.002 | 7.37E-01 | 18842 | -1.719  | -3.308  | -0.130 | 0.810 | -2.121 | -0.016 | 3.39E-02 | 18590 |
| 75 | Caudate_L            | 0.426  | -1.664  | 2.516  | 1.066 | 0.399  | 0.003  | 6.90E-01 | 18842 | 0.190   | -1.577  | 1.957  | 0.902 | 0.211  | 0.002  | 8.33E-01 | 18590 |
| 76 | Caudate_R            | 0.237  | -2.130  | 2.605  | 1.208 | 0.197  | 0.001  | 8.44E-01 | 18842 | 0.219   | -1.783  | 2.221  | 1.021 | 0.215  | 0.002  | 8.30E-01 | 18590 |
| 77 | Putamen_L            | -4.997 | -8.171  | -1.823 | 1.619 | -3.086 | -0.022 | 2.03E-03 | 18842 | 0.743   | -1.945  | 3.431  | 1.372 | 0.542  | 0.004  | 5.88E-01 | 18590 |
| 78 | Putamen_R            | -5.569 | -8.802  | -2.336 | 1.649 | -3.377 | -0.025 | 7.35E-04 | 18842 | 0.939   | -1.799  | 3.678  | 1.397 | 0.672  | 0.005  | 5.01E-01 | 18590 |
| 79 | Pallidum_L           | -0.224 | -0.507  | 0.058  | 0.144 | -1.558 | -0.011 | 1.19E-01 | 18842 | 0.081   | -0.158  | 0.320  | 0.122 | 0.664  | 0.005  | 5.07E-01 | 18590 |
| 80 | Pallidum_R           | -0.298 | -0.608  | 0.012  | 0.158 | -1.885 | -0.014 | 5.95E-02 | 18842 | 0.041   | -0.221  | 0.303  | 0.134 | 0.308  | 0.002  | 7.58E-01 | 18590 |
| 83 | Heschl_L             | -0.437 | -1.010  | 0.135  | 0.292 | -1.498 | -0.011 | 1.34E-01 | 18842 | 0.119   | -0.366  | 0.604  | 0.247 | 0.480  | 0.004  | 6.31E-01 | 18590 |
| 84 | Heschl_R             | -0.180 | -0.820  | 0.459  | 0.326 | -0.553 | -0.004 | 5.80E-01 | 18842 | 0.220   | -0.322  | 0.761  | 0.276 | 0.795  | 0.006  | 4.27E-01 | 18590 |
| 85 | Temporal_Sup_L       | -4.186 | -8.315  | -0.057 | 2.107 | -1.987 | -0.014 | 4.69E-02 | 18842 | 4.056   | 0.556   | 7.556  | 1.786 | 2.272  | 0.017  | 2.31E-02 | 18590 |
| 86 | Temporal_Sup_R       | -1.618 | -6.190  | 2.955  | 2.333 | -0.693 | -0.005 | 4.88E-01 | 18842 | 4.755   | 0.885   | 8.626  | 1.975 | 2.408  | 0.018  | 1.60E-02 | 18590 |
| 87 | Temporal_Pole_Sup_L  | -1.812 | -3.768  | 0.145  | 0.998 | -1.815 | -0.013 | 6.95E-02 | 18842 | 0.763   | -0.896  | 2.421  | 0.846 | 0.901  | 0.007  | 3.67E-01 | 18590 |
| 88 | Temporal_Pole_Sup_R  | -1.488 | -3.548  | 0.573  | 1.051 | -1.415 | -0.010 | 1.57E-01 | 18842 | 0.979   | -0.767  | 2.725  | 0.891 | 1.099  | 0.008  | 2.72E-01 | 18590 |
| 89 | Temporal_Mid_L       | -2.328 | -9.216  | 4.560  | 3.514 | -0.662 | -0.005 | 5.08E-01 | 18842 | 2.642   | -3.188  | 8.473  | 2.975 | 0.888  | 0.007  | 3.74E-01 | 18590 |
| 90 | Temporal_Mid_R       | -2.788 | -8.904  | 3.328  | 3.120 | -0.894 | -0.007 | 3.72E-01 | 18842 | 1.221   | -3.962  | 6.403  | 2.644 | 0.462  | 0.003  | 6.44E-01 | 18590 |
| 91 | Temporal_Pole_Mid_L  | -0.335 | -1.980  | 1.310  | 0.839 | -0.399 | -0.003 | 6.90E-01 | 18842 | 0.084   | -1.310  | 1.478  | 0.711 | 0.118  | 0.001  | 9.06E-01 | 18590 |

|     |                     |        |         |        |       |        |        |          |       |        |        |        |       |        |        |          |       |
|-----|---------------------|--------|---------|--------|-------|--------|--------|----------|-------|--------|--------|--------|-------|--------|--------|----------|-------|
| 92  | Temporal_Pole_Mid_R | 0.567  | -1.431  | 2.565  | 1.019 | 0.556  | 0.004  | 5.78E-01 | 18842 | 1.986  | 0.295  | 3.678  | 0.863 | 2.301  | 0.017  | 2.14E-02 | 18590 |
| 93  | Temporal_Inf_L      | -1.988 | -6.721  | 2.744  | 2.415 | -0.824 | -0.006 | 4.10E-01 | 18842 | -2.776 | -6.786 | 1.234  | 2.046 | -1.357 | -0.010 | 1.75E-01 | 18590 |
| 94  | Temporal_Inf_R      | -1.023 | -6.185  | 4.139  | 2.634 | -0.389 | -0.003 | 6.98E-01 | 18842 | -0.252 | -4.620 | 4.115  | 2.228 | -0.113 | -0.001 | 9.10E-01 | 18590 |
| 95  | Cerebellum_Crus1_L  | 1.024  | -4.599  | 6.648  | 2.869 | 0.357  | 0.003  | 7.21E-01 | 18842 | -2.249 | -7.011 | 2.512  | 2.429 | -0.926 | -0.007 | 3.55E-01 | 18590 |
| 96  | Cerebellum_Crus1_R  | 0.392  | -5.341  | 6.126  | 2.925 | 0.134  | 0.001  | 8.93E-01 | 18842 | 1.588  | -3.269 | 6.446  | 2.478 | 0.641  | 0.005  | 5.22E-01 | 18590 |
| 97  | Cerebellum_Crus2_L  | -2.911 | -7.369  | 1.547  | 2.274 | -1.280 | -0.009 | 2.01E-01 | 18842 | 1.930  | -1.850 | 5.710  | 1.928 | 1.001  | 0.007  | 3.17E-01 | 18590 |
| 98  | Cerebellum_Crus2_R  | 0.247  | -3.874  | 4.369  | 2.103 | 0.118  | 0.001  | 9.06E-01 | 18842 | 2.570  | -0.923 | 6.064  | 1.782 | 1.442  | 0.011  | 1.49E-01 | 18590 |
| 99  | Cerebellum_3_L      | -0.213 | -0.512  | 0.086  | 0.153 | -1.397 | -0.010 | 1.62E-01 | 18842 | -0.414 | -0.667 | -0.161 | 0.129 | -3.203 | -0.023 | 1.36E-03 | 18590 |
| 100 | Cerebellum_3_R      | -0.178 | -0.582  | 0.226  | 0.206 | -0.864 | -0.006 | 3.88E-01 | 18842 | -0.505 | -0.846 | -0.163 | 0.174 | -2.896 | -0.021 | 3.78E-03 | 18590 |
| 101 | Cerebellum_4_5_L    | -1.036 | -3.456  | 1.384  | 1.235 | -0.839 | -0.006 | 4.01E-01 | 18842 | -1.449 | -3.499 | 0.600  | 1.046 | -1.386 | -0.010 | 1.66E-01 | 18590 |
| 102 | Cerebellum_4_5_R    | -0.543 | -2.515  | 1.429  | 1.006 | -0.540 | -0.004 | 5.89E-01 | 18842 | -1.383 | -3.053 | 0.287  | 0.852 | -1.624 | -0.012 | 1.04E-01 | 18590 |
| 103 | Cerebellum_6_L      | -0.612 | -4.799  | 3.575  | 2.136 | -0.286 | -0.002 | 7.75E-01 | 18842 | -2.529 | -6.074 | 1.016  | 1.809 | -1.398 | -0.010 | 1.62E-01 | 18590 |
| 104 | Cerebellum_6_R      | -0.701 | -5.110  | 3.708  | 2.250 | -0.312 | -0.002 | 7.55E-01 | 18842 | -1.929 | -5.664 | 1.805  | 1.905 | -1.013 | -0.007 | 3.11E-01 | 18590 |
| 105 | Cerebellum_7b_L     | -1.021 | -2.384  | 0.342  | 0.696 | -1.468 | -0.011 | 1.42E-01 | 18842 | 1.191  | 0.035  | 2.347  | 0.590 | 2.020  | 0.015  | 4.34E-02 | 18590 |
| 106 | Cerebellum_7b_R     | -0.803 | -2.153  | 0.548  | 0.689 | -1.165 | -0.008 | 2.44E-01 | 18842 | 1.946  | 0.802  | 3.091  | 0.584 | 3.334  | 0.024  | 8.58E-04 | 18590 |
| 107 | Cerebellum_8_L      | -4.045 | -8.376  | 0.285  | 2.209 | -1.831 | -0.013 | 6.71E-02 | 18842 | 0.361  | -3.310 | 4.033  | 1.873 | 0.193  | 0.001  | 8.47E-01 | 18590 |
| 108 | Cerebellum_8_R      | -4.958 | -10.592 | 0.677  | 2.875 | -1.725 | -0.013 | 8.46E-02 | 18842 | 5.932  | 1.157  | 10.706 | 2.436 | 2.435  | 0.018  | 1.49E-02 | 18590 |
| 109 | Cerebellum_9_L      | -3.321 | -5.769  | -0.874 | 1.249 | -2.660 | -0.019 | 7.82E-03 | 18842 | -0.695 | -2.769 | 1.379  | 1.058 | -0.657 | -0.005 | 5.11E-01 | 18590 |
| 110 | Cerebellum_9_R      | -3.987 | -6.392  | -1.581 | 1.227 | -3.249 | -0.024 | 1.16E-03 | 18842 | -0.529 | -2.567 | 1.509  | 1.040 | -0.509 | -0.004 | 6.11E-01 | 18590 |
| 111 | Cerebellum_10_L     | -0.100 | -0.273  | 0.074  | 0.089 | -1.129 | -0.008 | 2.59E-01 | 18842 | -0.160 | -0.307 | -0.013 | 0.075 | -2.129 | -0.016 | 3.33E-02 | 18590 |
| 112 | Cerebellum_10_R     | 0.019  | -0.162  | 0.199  | 0.092 | 0.202  | 0.001  | 8.40E-01 | 18842 | 0.009  | -0.144 | 0.162  | 0.078 | 0.116  | 0.001  | 9.08E-01 | 18590 |
| 113 | Vermis_1_2          | -0.009 | -0.122  | 0.104  | 0.058 | -0.154 | -0.001 | 8.77E-01 | 18842 | -0.212 | -0.307 | -0.117 | 0.049 | -4.358 | -0.032 | 1.32E-05 | 18590 |
| 114 | Vermis_3            | -0.146 | -0.595  | 0.302  | 0.229 | -0.639 | -0.005 | 5.23E-01 | 18842 | -0.312 | -0.692 | 0.067  | 0.194 | -1.613 | -0.012 | 1.07E-01 | 18590 |
| 115 | Vermis_4_5          | -0.545 | -1.863  | 0.773  | 0.672 | -0.810 | -0.006 | 4.18E-01 | 18842 | -0.156 | -1.273 | 0.960  | 0.570 | -0.274 | -0.002 | 7.84E-01 | 18590 |
| 116 | Vermis_6            | -0.119 | -0.854  | 0.615  | 0.375 | -0.319 | -0.002 | 7.50E-01 | 18842 | -1.038 | -1.660 | -0.416 | 0.317 | -3.273 | -0.024 | 1.07E-03 | 18590 |
| 117 | Vermis_7            | -0.157 | -0.572  | 0.258  | 0.212 | -0.742 | -0.005 | 4.58E-01 | 18842 | -0.414 | -0.766 | -0.063 | 0.179 | -2.313 | -0.017 | 2.08E-02 | 18590 |
| 118 | Vermis_8            | -0.227 | -0.910  | 0.455  | 0.348 | -0.654 | -0.005 | 5.13E-01 | 18842 | -0.774 | -1.352 | -0.196 | 0.295 | -2.627 | -0.019 | 8.63E-03 | 18590 |
| 119 | Vermis_9            | -0.653 | -1.206  | -0.100 | 0.282 | -2.315 | -0.017 | 2.06E-02 | 18842 | -0.146 | -0.615 | 0.322  | 0.239 | -0.611 | -0.004 | 5.41E-01 | 18590 |
| 120 | Vermis_10           | -0.090 | -0.244  | 0.064  | 0.079 | -1.143 | -0.008 | 2.53E-01 | 18842 | -0.129 | -0.259 | 0.002  | 0.067 | -1.931 | -0.014 | 5.35E-02 | 18590 |
| 121 | Thal_AV_L           | 0.046  | -0.016  | 0.107  | 0.031 | 1.451  | 0.011  | 1.47E-01 | 18842 | 0.098  | 0.046  | 0.150  | 0.027 | 3.711  | 0.027  | 2.07E-04 | 18590 |
| 122 | Thal_AV_R           | 0.096  | 0.008   | 0.184  | 0.045 | 2.130  | 0.016  | 3.32E-02 | 18842 | 0.115  | 0.041  | 0.189  | 0.038 | 3.040  | 0.022  | 2.37E-03 | 18590 |
| 123 | Thal_LP_L           | -0.009 | -0.078  | 0.059  | 0.035 | -0.271 | -0.002 | 7.86E-01 | 18842 | 0.099  | 0.042  | 0.157  | 0.029 | 3.372  | 0.025  | 7.49E-04 | 18590 |
| 124 | Thal_LP_R           | 0.013  | -0.077  | 0.102  | 0.045 | 0.276  | 0.002  | 7.82E-01 | 18842 | 0.099  | 0.024  | 0.174  | 0.038 | 2.585  | 0.019  | 9.74E-03 | 18590 |
| 125 | Thal_VA_L           | 0.093  | 0.020   | 0.166  | 0.037 | 2.491  | 0.018  | 1.27E-02 | 18842 | 0.060  | -0.001 | 0.122  | 0.031 | 1.913  | 0.014  | 5.58E-02 | 18590 |
| 126 | Thal_VA_R           | 0.123  | 0.034   | 0.213  | 0.046 | 2.696  | 0.020  | 7.02E-03 | 18842 | 0.087  | 0.011  | 0.163  | 0.039 | 2.256  | 0.017  | 2.41E-02 | 18590 |
| 127 | Thal_VL_L           | 0.014  | -0.193  | 0.222  | 0.106 | 0.135  | 0.001  | 8.93E-01 | 18842 | 0.367  | 0.192  | 0.542  | 0.089 | 4.109  | 0.030  | 3.99E-05 | 18590 |
| 128 | Thal_VL_R           | 0.142  | -0.133  | 0.418  | 0.141 | 1.013  | 0.007  | 3.11E-01 | 18842 | 0.538  | 0.305  | 0.771  | 0.119 | 4.530  | 0.033  | 5.93E-06 | 18590 |
| 129 | Thal_VPL_L          | -0.275 | -0.522  | -0.027 | 0.126 | -2.176 | -0.016 | 2.95E-02 | 18842 | 0.280  | 0.071  | 0.490  | 0.107 | 2.626  | 0.019  | 8.65E-03 | 18590 |
| 130 | Thal_VPL_R          | -0.334 | -0.594  | -0.074 | 0.133 | -2.522 | -0.018 | 1.17E-02 | 18842 | 0.324  | 0.104  | 0.544  | 0.112 | 2.885  | 0.021  | 3.91E-03 | 18590 |
| 131 | Thal_IL_L           | -0.107 | -0.214  | 0.000  | 0.055 | -1.968 | -0.014 | 4.90E-02 | 18842 | 0.100  | 0.009  | 0.191  | 0.046 | 2.164  | 0.016  | 3.04E-02 | 18590 |
| 132 | Thal_IL_R           | -0.079 | -0.200  | 0.043  | 0.062 | -1.272 | -0.009 | 2.03E-01 | 18842 | 0.107  | 0.004  | 0.210  | 0.052 | 2.041  | 0.015  | 4.12E-02 | 18590 |
| 133 | Thal_Re_L           | 0.000  | 0.000   | 0.001  | 0.000 | 1.826  | 0.013  | 6.79E-02 | 18842 | 0.000  | 0.000  | 0.001  | 0.000 | 2.144  | 0.016  | 3.21E-02 | 18590 |
| 134 | Thal_Re_R           | 0.002  | -0.002  | 0.006  | 0.002 | 1.045  | 0.008  | 2.96E-01 | 18842 | 0.004  | 0.001  | 0.007  | 0.002 | 2.854  | 0.021  | 4.33E-03 | 18590 |
| 135 | Thal_MDm_L          | -0.576 | -1.368  | 0.217  | 0.404 | -1.424 | -0.010 | 1.54E-01 | 18842 | 0.962  | 0.292  | 1.631  | 0.342 | 2.815  | 0.021  | 4.88E-03 | 18590 |
| 136 | Thal_MDm_R          | -0.562 | -1.483  | 0.359  | 0.470 | -1.196 | -0.009 | 2.32E-01 | 18842 | 1.122  | 0.345  | 1.899  | 0.397 | 2.830  | 0.021  | 4.67E-03 | 18590 |
| 137 | Thal_MDl_L          | -0.113 | -0.250  | 0.024  | 0.070 | -1.612 | -0.012 | 1.07E-01 | 18842 | 0.213  | 0.097  | 0.329  | 0.059 | 3.594  | 0.026  | 3.26E-04 | 18590 |
| 138 | Thal_MDl_R          | -0.082 | -0.238  | 0.074  | 0.080 | -1.034 | -0.008 | 3.01E-01 | 18842 | 0.204  | 0.073  | 0.336  | 0.067 | 3.042  | 0.022  | 2.35E-03 | 18590 |
| 139 | Thal_LGN_L          | -0.009 | -0.030  | 0.012  | 0.011 | -0.836 | -0.006 | 4.03E-01 | 18842 | 0.010  | -0.007 | 0.028  | 0.009 | 1.163  | 0.009  | 2.45E-01 | 18590 |
| 140 | Thal_LGN_R          | -0.046 | -0.090  | -0.001 | 0.023 | -2.025 | -0.015 | 4.29E-02 | 18842 | 0.048  | 0.011  | 0.086  | 0.019 | 2.528  | 0.019  | 1.15E-02 | 18590 |

|     |            |        |        |        |       |        |        |          |       |        |        |        |       |        |        |          |       |
|-----|------------|--------|--------|--------|-------|--------|--------|----------|-------|--------|--------|--------|-------|--------|--------|----------|-------|
| 141 | Thal_MGN_L | -0.071 | -0.108 | -0.033 | 0.019 | -3.724 | -0.027 | 1.96E-04 | 18842 | -0.002 | -0.034 | 0.029  | 0.016 | -0.155 | -0.001 | 8.77E-01 | 18590 |
| 142 | Thal_MGN_R | -0.062 | -0.102 | -0.021 | 0.021 | -2.992 | -0.022 | 2.78E-03 | 18842 | 0.019  | -0.015 | 0.053  | 0.017 | 1.086  | 0.008  | 2.78E-01 | 18590 |
| 143 | Thal_PuA_L | -0.052 | -0.095 | -0.008 | 0.022 | -2.300 | -0.017 | 2.14E-02 | 18842 | 0.000  | -0.037 | 0.038  | 0.019 | 0.025  | 0.000  | 9.80E-01 | 18590 |
| 144 | Thal_PuA_R | -0.122 | -0.213 | -0.031 | 0.047 | -2.623 | -0.019 | 8.71E-03 | 18842 | 0.034  | -0.043 | 0.111  | 0.039 | 0.862  | 0.006  | 3.89E-01 | 18590 |
| 145 | Thal_PuM_L | -0.790 | -1.662 | 0.083  | 0.445 | -1.774 | -0.013 | 7.60E-02 | 18842 | 0.288  | -0.451 | 1.026  | 0.377 | 0.763  | 0.006  | 4.45E-01 | 18590 |
| 146 | Thal_PuM_R | -1.162 | -2.249 | -0.076 | 0.554 | -2.097 | -0.015 | 3.60E-02 | 18842 | 0.479  | -0.441 | 1.399  | 0.469 | 1.020  | 0.007  | 3.08E-01 | 18590 |
| 147 | Thal_PuL_L | -0.161 | -0.320 | -0.001 | 0.081 | -1.977 | -0.014 | 4.81E-02 | 18842 | 0.101  | -0.033 | 0.236  | 0.069 | 1.475  | 0.011  | 1.40E-01 | 18590 |
| 148 | Thal_PuL_R | -0.308 | -0.561 | -0.055 | 0.129 | -2.388 | -0.017 | 1.69E-02 | 18842 | 0.145  | -0.069 | 0.359  | 0.109 | 1.328  | 0.010  | 1.84E-01 | 18590 |
| 149 | Thal_PuL_L | -0.004 | -0.047 | 0.040  | 0.022 | -0.171 | -0.001 | 8.64E-01 | 18842 | 0.037  | 0.000  | 0.074  | 0.019 | 1.981  | 0.015  | 4.76E-02 | 18590 |
| 150 | Thal_PuL_R | -0.005 | -0.062 | 0.052  | 0.029 | -0.171 | -0.001 | 8.65E-01 | 18842 | 0.050  | 0.002  | 0.099  | 0.025 | 2.037  | 0.015  | 4.17E-02 | 18590 |
| 151 | ACC_sub_L  | -0.174 | -0.673 | 0.325  | 0.255 | -0.685 | -0.005 | 4.94E-01 | 18842 | -0.090 | -0.514 | 0.333  | 0.216 | -0.418 | -0.003 | 6.76E-01 | 18590 |
| 152 | ACC_sub_R  | -0.147 | -0.613 | 0.320  | 0.238 | -0.616 | -0.004 | 5.38E-01 | 18842 | 0.001  | -0.394 | 0.396  | 0.202 | 0.005  | 0.000  | 9.96E-01 | 18590 |
| 153 | ACC_pre_L  | -0.878 | -2.158 | 0.402  | 0.653 | -1.344 | -0.010 | 1.79E-01 | 18842 | 0.462  | -0.623 | 1.547  | 0.554 | 0.835  | 0.006  | 4.04E-01 | 18590 |
| 154 | ACC_pre_R  | -0.772 | -2.005 | 0.460  | 0.629 | -1.228 | -0.009 | 2.19E-01 | 18842 | 0.537  | -0.507 | 1.582  | 0.533 | 1.009  | 0.007  | 3.13E-01 | 18590 |
| 155 | ACC_sup_L  | -1.141 | -2.532 | 0.250  | 0.710 | -1.608 | -0.012 | 1.08E-01 | 18842 | 0.089  | -1.090 | 1.268  | 0.601 | 0.148  | 0.001  | 8.82E-01 | 18590 |
| 156 | ACC_sup_R  | -1.154 | -2.595 | 0.286  | 0.735 | -1.570 | -0.011 | 1.16E-01 | 18842 | -0.191 | -1.412 | 1.029  | 0.623 | -0.307 | -0.002 | 7.59E-01 | 18590 |
| 157 | N_Acc_L    | 0.227  | -0.192 | 0.645  | 0.214 | 1.061  | 0.008  | 2.89E-01 | 18842 | 0.512  | 0.157  | 0.867  | 0.181 | 2.828  | 0.021  | 4.69E-03 | 18590 |
| 158 | N_Acc_R    | -0.052 | -0.414 | 0.310  | 0.185 | -0.283 | -0.002 | 7.77E-01 | 18842 | 0.491  | 0.184  | 0.798  | 0.157 | 3.134  | 0.023  | 1.72E-03 | 18590 |
| 159 | VTA_L      | 0.000  | -0.014 | 0.015  | 0.008 | 0.043  | 0.000  | 9.66E-01 | 18842 | 0.005  | -0.007 | 0.017  | 0.006 | 0.785  | 0.006  | 4.32E-01 | 18590 |
| 160 | VTA_R      | -0.002 | -0.015 | 0.012  | 0.007 | -0.225 | -0.002 | 8.22E-01 | 18842 | 0.003  | -0.008 | 0.014  | 0.006 | 0.495  | 0.004  | 6.21E-01 | 18590 |
| 161 | SN_pc_L    | -0.027 | -0.050 | -0.003 | 0.012 | -2.211 | -0.016 | 2.70E-02 | 18842 | -0.003 | -0.023 | 0.017  | 0.010 | -0.269 | -0.002 | 7.88E-01 | 18590 |
| 162 | SN_pc_R    | -0.036 | -0.067 | -0.005 | 0.016 | -2.284 | -0.017 | 2.24E-02 | 18842 | -0.002 | -0.028 | 0.025  | 0.013 | -0.126 | -0.001 | 8.99E-01 | 18590 |
| 163 | SN_pr_L    | -0.036 | -0.068 | -0.004 | 0.016 | -2.215 | -0.016 | 2.68E-02 | 18842 | 0.021  | -0.006 | 0.049  | 0.014 | 1.541  | 0.011  | 1.23E-01 | 18590 |
| 164 | SN_pr_R    | -0.036 | -0.072 | 0.000  | 0.018 | -1.954 | -0.014 | 5.07E-02 | 18842 | 0.021  | -0.010 | 0.052  | 0.016 | 1.344  | 0.010  | 1.79E-01 | 18590 |
| 165 | Red_N_L    | -0.024 | -0.064 | 0.015  | 0.020 | -1.198 | -0.009 | 2.31E-01 | 18842 | 0.012  | -0.022 | 0.045  | 0.017 | 0.699  | 0.005  | 4.85E-01 | 18590 |
| 166 | Red_N_R    | -0.025 | -0.068 | 0.018  | 0.022 | -1.128 | -0.008 | 2.59E-01 | 18842 | 0.010  | -0.027 | 0.046  | 0.019 | 0.531  | 0.004  | 5.95E-01 | 18590 |
| 167 | LC_L       | 0.011  | -0.004 | 0.026  | 0.008 | 1.425  | 0.010  | 1.54E-01 | 18842 | -0.018 | -0.030 | -0.005 | 0.006 | -2.813 | -0.021 | 4.91E-03 | 18590 |
| 168 | LC_R       | 0.010  | -0.006 | 0.026  | 0.008 | 1.229  | 0.009  | 2.19E-01 | 18842 | -0.022 | -0.035 | -0.008 | 0.007 | -3.087 | -0.023 | 2.02E-03 | 18590 |
| 169 | Raphe_D    | -0.026 | -0.083 | 0.031  | 0.029 | -0.890 | -0.006 | 3.74E-01 | 18842 | 0.026  | -0.023 | 0.075  | 0.025 | 1.052  | 0.008  | 2.93E-01 | 18590 |
| 170 | Raphe_M    | 0.012  | -0.006 | 0.029  | 0.009 | 1.341  | 0.010  | 1.80E-01 | 18842 | -0.019 | -0.034 | -0.004 | 0.008 | -2.511 | -0.018 | 1.20E-02 | 18590 |

**Non-oily fish intake**

| Number | AAL 3 region        | beta     | 95%CI l  | 95%CI h | se     | t      | r      | p        | df.e  |
|--------|---------------------|----------|----------|---------|--------|--------|--------|----------|-------|
| 0      | Total brain         | -112.462 | -283.786 | 58.863  | 87.406 | -1.287 | -0.009 | 1.98E-01 | 18837 |
| 1      | Precentral_L        | -5.509   | -11.532  | 0.515   | 3.073  | -1.793 | -0.013 | 7.31E-02 | 18837 |
| 2      | Precentral_R        | 0.462    | -5.058   | 5.981   | 2.816  | 0.164  | 0.001  | 8.70E-01 | 18837 |
| 3      | Frontal_Sup_2_L     | -5.124   | -11.484  | 1.235   | 3.245  | -1.579 | -0.012 | 1.14E-01 | 18837 |
| 4      | Frontal_Sup_2_R     | -10.058  | -17.067  | -3.050  | 3.576  | -2.813 | -0.020 | 4.91E-03 | 18837 |
| 5      | Frontal_Mid_2_L     | -5.484   | -12.165  | 1.196   | 3.408  | -1.609 | -0.012 | 1.08E-01 | 18837 |
| 6      | Frontal_Mid_2_R     | -8.823   | -16.382  | -1.264  | 3.856  | -2.288 | -0.017 | 2.22E-02 | 18837 |
| 7      | Frontal_Inf_Oper_L  | -2.278   | -4.251   | -0.305  | 1.006  | -2.263 | -0.016 | 2.36E-02 | 18837 |
| 8      | Frontal_Inf_Oper_R  | -2.558   | -5.033   | -0.083  | 1.263  | -2.026 | -0.015 | 4.28E-02 | 18837 |
| 9      | Frontal_Inf_Tri_L   | -1.971   | -6.161   | 2.219   | 2.138  | -0.922 | -0.007 | 3.56E-01 | 18837 |
| 10     | Frontal_Inf_Tri_R   | -3.562   | -6.853   | -0.271  | 1.679  | -2.122 | -0.015 | 3.39E-02 | 18837 |
| 11     | Frontal_Inf_Orb_2_L | -0.804   | -2.057   | 0.449   | 0.639  | -1.258 | -0.009 | 2.09E-01 | 18837 |
| 12     | Frontal_Inf_Orb_2_R | -1.156   | -2.466   | 0.153   | 0.668  | -1.731 | -0.013 | 8.35E-02 | 18837 |
| 13     | Rolandic_Oper_L     | -0.055   | -1.950   | 1.839   | 0.967  | -0.057 | 0.000  | 9.54E-01 | 18837 |
| 14     | Rolandic_Oper_R     | -0.200   | -2.912   | 2.511   | 1.383  | -0.145 | -0.001 | 8.85E-01 | 18837 |
| 15     | Supp_Motor_Area_L   | -2.597   | -7.104   | 1.910   | 2.299  | -1.129 | -0.008 | 2.59E-01 | 18837 |
| 16     | Supp_Motor_Area_R   | -1.335   | -6.315   | 3.646   | 2.541  | -0.525 | -0.004 | 5.99E-01 | 18837 |

|    |                      |        |        |        |       |        |        |          |       |
|----|----------------------|--------|--------|--------|-------|--------|--------|----------|-------|
| 17 | Olfactory_L          | 0.088  | -0.582 | 0.757  | 0.342 | 0.256  | 0.002  | 7.98E-01 | 18837 |
| 18 | Olfactory_R          | 0.132  | -0.540 | 0.803  | 0.343 | 0.385  | 0.003  | 7.01E-01 | 18837 |
| 19 | Frontal_Sup_Medial_L | -4.852 | -9.076 | -0.627 | 2.155 | -2.251 | -0.016 | 2.44E-02 | 18837 |
| 20 | Frontal_Sup_Medial_R | -3.762 | -6.836 | -0.689 | 1.568 | -2.399 | -0.017 | 1.64E-02 | 18837 |
| 21 | Frontal_Med_Orb_L    | -0.834 | -2.412 | 0.745  | 0.805 | -1.035 | -0.008 | 3.01E-01 | 18837 |
| 22 | Frontal_Med_Orb_R    | -1.331 | -3.271 | 0.608  | 0.989 | -1.346 | -0.010 | 1.78E-01 | 18837 |
| 23 | Rectus_L             | -0.873 | -2.507 | 0.761  | 0.833 | -1.048 | -0.008 | 2.95E-01 | 18837 |
| 24 | Rectus_R             | -0.562 | -2.074 | 0.949  | 0.771 | -0.729 | -0.005 | 4.66E-01 | 18837 |
| 25 | OFCmed_L             | -1.395 | -2.342 | -0.448 | 0.483 | -2.888 | -0.021 | 3.88E-03 | 18837 |
| 26 | OFCmed_R             | -0.765 | -1.868 | 0.338  | 0.563 | -1.360 | -0.010 | 1.74E-01 | 18837 |
| 27 | OFCant_L             | -0.758 | -1.853 | 0.336  | 0.558 | -1.358 | -0.010 | 1.74E-01 | 18837 |
| 28 | OFCant_R             | -1.297 | -2.742 | 0.149  | 0.738 | -1.758 | -0.013 | 7.88E-02 | 18837 |
| 29 | OFCpost_L            | -0.542 | -1.912 | 0.827  | 0.699 | -0.776 | -0.006 | 4.38E-01 | 18837 |
| 30 | OFCpost_R            | -0.719 | -1.985 | 0.547  | 0.646 | -1.113 | -0.008 | 2.66E-01 | 18837 |
| 31 | OFClat_L             | -0.344 | -0.806 | 0.119  | 0.236 | -1.457 | -0.011 | 1.45E-01 | 18837 |
| 32 | OFClat_R             | -0.616 | -1.007 | -0.226 | 0.199 | -3.095 | -0.023 | 1.97E-03 | 18837 |
| 33 | Insula_L             | -1.948 | -6.186 | 2.290  | 2.162 | -0.901 | -0.007 | 3.68E-01 | 18837 |
| 34 | Insula_R             | -2.809 | -6.939 | 1.320  | 2.107 | -1.333 | -0.010 | 1.82E-01 | 18837 |
| 37 | Cingulate_Mid_L      | -3.665 | -7.251 | -0.078 | 1.830 | -2.003 | -0.015 | 4.52E-02 | 18837 |
| 38 | Cingulate_Mid_R      | -2.341 | -6.165 | 1.482  | 1.951 | -1.200 | -0.009 | 2.30E-01 | 18837 |
| 39 | Cingulate_Post_L     | -0.023 | -1.117 | 1.070  | 0.558 | -0.042 | 0.000  | 9.67E-01 | 18837 |
| 40 | Cingulate_Post_R     | -0.037 | -0.644 | 0.570  | 0.310 | -0.119 | -0.001 | 9.06E-01 | 18837 |
| 41 | Hippocampus_L        | 0.690  | -1.079 | 2.460  | 0.903 | 0.765  | 0.006  | 4.44E-01 | 18837 |
| 42 | Hippocampus_R        | 1.257  | -0.580 | 3.093  | 0.937 | 1.341  | 0.010  | 1.80E-01 | 18837 |
| 43 | ParaHippocampaL_L    | 0.264  | -1.308 | 1.836  | 0.802 | 0.329  | 0.002  | 7.42E-01 | 18837 |
| 44 | ParaHippocampaL_R    | -0.250 | -2.236 | 1.735  | 1.013 | -0.247 | -0.002 | 8.05E-01 | 18837 |
| 45 | Amygdala_L           | -0.147 | -0.758 | 0.464  | 0.312 | -0.471 | -0.003 | 6.37E-01 | 18837 |
| 46 | Amygdala_R           | -0.419 | -1.045 | 0.206  | 0.319 | -1.315 | -0.010 | 1.89E-01 | 18837 |
| 47 | Calcarine_L          | 4.371  | -1.459 | 10.200 | 2.974 | 1.470  | 0.011  | 1.42E-01 | 18837 |
| 48 | Calcarine_R          | 3.389  | -1.482 | 8.259  | 2.485 | 1.364  | 0.010  | 1.73E-01 | 18837 |
| 49 | Cuneus_L             | 0.688  | -2.972 | 4.348  | 1.867 | 0.368  | 0.003  | 7.13E-01 | 18837 |
| 50 | Cuneus_R             | -0.583 | -3.382 | 2.216  | 1.428 | -0.408 | -0.003 | 6.83E-01 | 18837 |
| 51 | Lingual_L            | 1.385  | -2.124 | 4.894  | 1.790 | 0.774  | 0.006  | 4.39E-01 | 18837 |
| 52 | Lingual_R            | 0.746  | -2.929 | 4.421  | 1.875 | 0.398  | 0.003  | 6.91E-01 | 18837 |
| 53 | Occipital_Sup_L      | -2.255 | -4.668 | 0.157  | 1.231 | -1.833 | -0.013 | 6.69E-02 | 18837 |
| 54 | Occipital_Sup_R      | -1.560 | -4.175 | 1.054  | 1.334 | -1.170 | -0.009 | 2.42E-01 | 18837 |
| 55 | Occipital_Mid_L      | 1.396  | -4.253 | 7.045  | 2.882 | 0.484  | 0.004  | 6.28E-01 | 18837 |
| 56 | Occipital_Mid_R      | -2.791 | -6.725 | 1.143  | 2.007 | -1.390 | -0.010 | 1.64E-01 | 18837 |
| 57 | Occipital_Inf_L      | 1.882  | 0.008  | 3.757  | 0.956 | 1.968  | 0.014  | 4.90E-02 | 18837 |
| 58 | Occipital_Inf_R      | -1.525 | -3.692 | 0.641  | 1.105 | -1.380 | -0.010 | 1.68E-01 | 18837 |
| 59 | Fusiform_L           | 1.774  | -2.332 | 5.880  | 2.095 | 0.847  | 0.006  | 3.97E-01 | 18837 |
| 60 | Fusiform_R           | 0.820  | -3.692 | 5.331  | 2.302 | 0.356  | 0.003  | 7.22E-01 | 18837 |
| 61 | Postcentral_L        | 0.878  | -5.302 | 7.057  | 3.153 | 0.278  | 0.002  | 7.81E-01 | 18837 |
| 62 | Postcentral_R        | 2.792  | -3.533 | 9.118  | 3.227 | 0.865  | 0.006  | 3.87E-01 | 18837 |
| 63 | Parietal_Sup_L       | -2.997 | -6.556 | 0.562  | 1.816 | -1.650 | -0.012 | 9.89E-02 | 18837 |
| 64 | Parietal_Sup_R       | -2.187 | -5.343 | 0.969  | 1.610 | -1.358 | -0.010 | 1.74E-01 | 18837 |
| 65 | Parietal_Inf_L       | -0.151 | -4.811 | 4.508  | 2.377 | -0.064 | 0.000  | 9.49E-01 | 18837 |
| 66 | Parietal_Inf_R       | -0.946 | -3.966 | 2.074  | 1.541 | -0.614 | -0.004 | 5.39E-01 | 18837 |
| 67 | SupraMarginal_L      | -1.142 | -3.873 | 1.590  | 1.394 | -0.819 | -0.006 | 4.13E-01 | 18837 |

|     |                      |        |         |       |       |        |        |          |       |
|-----|----------------------|--------|---------|-------|-------|--------|--------|----------|-------|
| 68  | SupraMarginal_R      | -3.258 | -7.125  | 0.609 | 1.973 | -1.652 | -0.012 | 9.86E-02 | 18837 |
| 69  | Angular_L            | 1.551  | -1.132  | 4.235 | 1.369 | 1.133  | 0.008  | 2.57E-01 | 18837 |
| 70  | Angular_R            | 2.325  | -1.270  | 5.921 | 1.834 | 1.268  | 0.009  | 2.05E-01 | 18837 |
| 71  | Precuneus_L          | 1.055  | -5.484  | 7.595 | 3.336 | 0.316  | 0.002  | 7.52E-01 | 18837 |
| 72  | Precuneus_R          | -1.278 | -7.103  | 4.546 | 2.971 | -0.430 | -0.003 | 6.67E-01 | 18837 |
| 73  | Paracentral_Lobule_L | -1.156 | -4.150  | 1.839 | 1.528 | -0.757 | -0.006 | 4.49E-01 | 18837 |
| 74  | Paracentral_Lobule_R | 0.129  | -2.015  | 2.274 | 1.094 | 0.118  | 0.001  | 9.06E-01 | 18837 |
| 75  | Caudate_L            | -0.380 | -2.771  | 2.011 | 1.220 | -0.312 | -0.002 | 7.55E-01 | 18837 |
| 76  | Caudate_R            | -1.240 | -3.950  | 1.469 | 1.382 | -0.897 | -0.007 | 3.70E-01 | 18837 |
| 77  | Putamen_L            | -2.868 | -6.499  | 0.764 | 1.853 | -1.548 | -0.011 | 1.22E-01 | 18837 |
| 78  | Putamen_R            | -3.558 | -7.257  | 0.140 | 1.887 | -1.886 | -0.014 | 5.94E-02 | 18837 |
| 79  | Pallidum_L           | -0.117 | -0.440  | 0.206 | 0.165 | -0.712 | -0.005 | 4.76E-01 | 18837 |
| 80  | Pallidum_R           | -0.122 | -0.476  | 0.233 | 0.181 | -0.673 | -0.005 | 5.01E-01 | 18837 |
| 83  | Heschl_L             | -0.094 | -0.748  | 0.560 | 0.334 | -0.282 | -0.002 | 7.78E-01 | 18837 |
| 84  | Heschl_R             | -0.189 | -0.920  | 0.542 | 0.373 | -0.506 | -0.004 | 6.13E-01 | 18837 |
| 85  | Temporal_Sup_L       | -2.232 | -6.954  | 2.490 | 2.409 | -0.926 | -0.007 | 3.54E-01 | 18837 |
| 86  | Temporal_Sup_R       | -0.753 | -5.982  | 4.475 | 2.668 | -0.282 | -0.002 | 7.78E-01 | 18837 |
| 87  | Temporal_Pole_Sup_L  | -0.506 | -2.744  | 1.733 | 1.142 | -0.443 | -0.003 | 6.58E-01 | 18837 |
| 88  | Temporal_Pole_Sup_R  | -1.007 | -3.363  | 1.349 | 1.202 | -0.838 | -0.006 | 4.02E-01 | 18837 |
| 89  | Temporal_Mid_L       | -1.844 | -9.724  | 6.036 | 4.020 | -0.459 | -0.003 | 6.46E-01 | 18837 |
| 90  | Temporal_Mid_R       | 2.158  | -4.835  | 9.150 | 3.567 | 0.605  | 0.004  | 5.45E-01 | 18837 |
| 91  | Temporal_Pole_Mid_L  | 0.878  | -1.003  | 2.759 | 0.960 | 0.915  | 0.007  | 3.60E-01 | 18837 |
| 92  | Temporal_Pole_Mid_R  | -0.112 | -2.396  | 2.173 | 1.166 | -0.096 | -0.001 | 9.24E-01 | 18837 |
| 93  | Temporal_Inf_L       | -0.543 | -5.957  | 4.871 | 2.762 | -0.197 | -0.001 | 8.44E-01 | 18837 |
| 94  | Temporal_Inf_R       | -0.407 | -6.311  | 5.496 | 3.012 | -0.135 | -0.001 | 8.92E-01 | 18837 |
| 95  | Cerebellum_Crus1_L   | 2.752  | -3.679  | 9.183 | 3.281 | 0.839  | 0.006  | 4.02E-01 | 18837 |
| 96  | Cerebellum_Crus1_R   | -0.187 | -6.743  | 6.369 | 3.345 | -0.056 | 0.000  | 9.56E-01 | 18837 |
| 97  | Cerebellum_Crus2_L   | -2.459 | -7.559  | 2.640 | 2.602 | -0.945 | -0.007 | 3.45E-01 | 18837 |
| 98  | Cerebellum_Crus2_R   | -2.112 | -6.826  | 2.602 | 2.405 | -0.878 | -0.006 | 3.80E-01 | 18837 |
| 99  | Cerebellum_3_L       | 0.014  | -0.328  | 0.356 | 0.174 | 0.079  | 0.001  | 9.37E-01 | 18837 |
| 100 | Cerebellum_3_R       | -0.097 | -0.558  | 0.365 | 0.235 | -0.411 | -0.003 | 6.81E-01 | 18837 |
| 101 | Cerebellum_4_5_L     | -0.753 | -3.521  | 2.015 | 1.412 | -0.533 | -0.004 | 5.94E-01 | 18837 |
| 102 | Cerebellum_4_5_R     | -0.908 | -3.164  | 1.347 | 1.151 | -0.789 | -0.006 | 4.30E-01 | 18837 |
| 103 | Cerebellum_6_L       | 1.147  | -3.642  | 5.936 | 2.443 | 0.469  | 0.003  | 6.39E-01 | 18837 |
| 104 | Cerebellum_6_R       | 0.947  | -4.097  | 5.991 | 2.573 | 0.368  | 0.003  | 7.13E-01 | 18837 |
| 105 | Cerebellum_7b_L      | -0.447 | -2.007  | 1.112 | 0.795 | -0.562 | -0.004 | 5.74E-01 | 18837 |
| 106 | Cerebellum_7b_R      | -1.125 | -2.670  | 0.420 | 0.788 | -1.427 | -0.010 | 1.53E-01 | 18837 |
| 107 | Cerebellum_8_L       | -2.296 | -7.248  | 2.656 | 2.526 | -0.909 | -0.007 | 3.63E-01 | 18837 |
| 108 | Cerebellum_8_R       | -4.445 | -10.890 | 2.000 | 3.288 | -1.352 | -0.010 | 1.76E-01 | 18837 |
| 109 | Cerebellum_9_L       | -0.105 | -2.903  | 2.694 | 1.428 | -0.074 | -0.001 | 9.41E-01 | 18837 |
| 110 | Cerebellum_9_R       | -0.145 | -2.896  | 2.606 | 1.404 | -0.104 | -0.001 | 9.18E-01 | 18837 |
| 111 | Cerebellum_10_L      | 0.065  | -0.133  | 0.264 | 0.101 | 0.644  | 0.005  | 5.20E-01 | 18837 |
| 112 | Cerebellum_10_R      | 0.008  | -0.198  | 0.215 | 0.105 | 0.079  | 0.001  | 9.37E-01 | 18837 |
| 113 | Vermis_1_2           | 0.040  | -0.089  | 0.169 | 0.066 | 0.609  | 0.004  | 5.42E-01 | 18837 |
| 114 | Vermis_3             | -0.014 | -0.527  | 0.498 | 0.262 | -0.055 | 0.000  | 9.56E-01 | 18837 |
| 115 | Vermis_4_5           | -0.019 | -1.526  | 1.488 | 0.769 | -0.025 | 0.000  | 9.80E-01 | 18837 |
| 116 | Vermis_6             | 0.365  | -0.475  | 1.204 | 0.428 | 0.851  | 0.006  | 3.95E-01 | 18837 |
| 117 | Vermis_7             | 0.160  | -0.314  | 0.635 | 0.242 | 0.662  | 0.005  | 5.08E-01 | 18837 |
| 118 | Vermis_8             | 0.349  | -0.431  | 1.129 | 0.398 | 0.878  | 0.006  | 3.80E-01 | 18837 |



|     |            |        |        |        |       |        |        |          |       |
|-----|------------|--------|--------|--------|-------|--------|--------|----------|-------|
| 119 | Vermis_9   | -0.128 | -0.761 | 0.504  | 0.323 | -0.398 | -0.003 | 6.91E-01 | 18837 |
| 120 | Vermis_10  | 0.016  | -0.160 | 0.192  | 0.090 | 0.180  | 0.001  | 8.57E-01 | 18837 |
| 121 | Thal_AV_L  | 0.006  | -0.065 | 0.076  | 0.036 | 0.160  | 0.001  | 8.73E-01 | 18837 |
| 122 | Thal_AV_R  | 0.042  | -0.059 | 0.142  | 0.051 | 0.811  | 0.006  | 4.17E-01 | 18837 |
| 123 | Thal_LP_L  | -0.032 | -0.111 | 0.046  | 0.040 | -0.811 | -0.006 | 4.18E-01 | 18837 |
| 124 | Thal_LP_R  | -0.037 | -0.139 | 0.065  | 0.052 | -0.706 | -0.005 | 4.80E-01 | 18837 |
| 125 | Thal_VA_L  | 0.026  | -0.057 | 0.109  | 0.043 | 0.612  | 0.004  | 5.40E-01 | 18837 |
| 126 | Thal_VA_R  | 0.048  | -0.055 | 0.150  | 0.052 | 0.912  | 0.007  | 3.62E-01 | 18837 |
| 127 | Thal_VL_L  | -0.127 | -0.364 | 0.111  | 0.121 | -1.044 | -0.008 | 2.96E-01 | 18837 |
| 128 | Thal_VL_R  | -0.205 | -0.521 | 0.110  | 0.161 | -1.277 | -0.009 | 2.02E-01 | 18837 |
| 129 | Thal_VPL_L | -0.114 | -0.396 | 0.169  | 0.144 | -0.788 | -0.006 | 4.31E-01 | 18837 |
| 130 | Thal_VPL_R | -0.193 | -0.490 | 0.105  | 0.152 | -1.270 | -0.009 | 2.04E-01 | 18837 |
| 131 | Thal_IL_L  | -0.111 | -0.233 | 0.011  | 0.062 | -1.777 | -0.013 | 7.56E-02 | 18837 |
| 132 | Thal_IL_R  | -0.082 | -0.221 | 0.057  | 0.071 | -1.162 | -0.008 | 2.45E-01 | 18837 |
| 133 | Thal_Re_L  | -0.001 | -0.001 | 0.000  | 0.000 | -2.328 | -0.017 | 1.99E-02 | 18837 |
| 134 | Thal_Re_R  | -0.001 | -0.005 | 0.003  | 0.002 | -0.616 | -0.004 | 5.38E-01 | 18837 |
| 135 | Thal_MDm_L | -0.636 | -1.542 | 0.270  | 0.462 | -1.376 | -0.010 | 1.69E-01 | 18837 |
| 136 | Thal_MDm_R | -0.413 | -1.466 | 0.640  | 0.537 | -0.768 | -0.006 | 4.42E-01 | 18837 |
| 137 | Thal_MDl_L | -0.168 | -0.325 | -0.011 | 0.080 | -2.098 | -0.015 | 3.59E-02 | 18837 |
| 138 | Thal_MDl_R | -0.093 | -0.271 | 0.085  | 0.091 | -1.024 | -0.007 | 3.06E-01 | 18837 |
| 139 | Thal_LGN_L | -0.017 | -0.041 | 0.007  | 0.012 | -1.416 | -0.010 | 1.57E-01 | 18837 |
| 140 | Thal_LGN_R | -0.064 | -0.114 | -0.013 | 0.026 | -2.462 | -0.018 | 1.38E-02 | 18837 |
| 141 | Thal_MGN_L | -0.058 | -0.100 | -0.015 | 0.022 | -2.674 | -0.019 | 7.51E-03 | 18837 |
| 142 | Thal_MGN_R | -0.067 | -0.113 | -0.021 | 0.024 | -2.844 | -0.021 | 4.46E-03 | 18837 |
| 143 | Thal_PuA_L | -0.062 | -0.112 | -0.012 | 0.026 | -2.423 | -0.018 | 1.54E-02 | 18837 |
| 144 | Thal_PuA_R | -0.134 | -0.238 | -0.030 | 0.053 | -2.519 | -0.018 | 1.18E-02 | 18837 |
| 145 | Thal_PuM_L | -0.967 | -1.964 | 0.031  | 0.509 | -1.900 | -0.014 | 5.75E-02 | 18837 |
| 146 | Thal_PuM_R | -0.977 | -2.220 | 0.266  | 0.634 | -1.541 | -0.011 | 1.23E-01 | 18837 |
| 147 | Thal_PuL_L | -0.157 | -0.339 | 0.025  | 0.093 | -1.686 | -0.012 | 9.18E-02 | 18837 |
| 148 | Thal_PuL_R | -0.212 | -0.501 | 0.078  | 0.148 | -1.435 | -0.010 | 1.51E-01 | 18837 |
| 149 | Thal_PuL_L | -0.012 | -0.062 | 0.037  | 0.025 | -0.487 | -0.004 | 6.26E-01 | 18837 |
| 150 | Thal_PuL_R | -0.011 | -0.077 | 0.054  | 0.033 | -0.331 | -0.002 | 7.41E-01 | 18837 |
| 151 | ACC_sub_L  | -0.539 | -1.110 | 0.032  | 0.291 | -1.850 | -0.013 | 6.43E-02 | 18837 |
| 152 | ACC_sub_R  | -0.384 | -0.917 | 0.149  | 0.272 | -1.413 | -0.010 | 1.58E-01 | 18837 |
| 153 | ACC_pre_L  | -1.458 | -2.922 | 0.006  | 0.747 | -1.953 | -0.014 | 5.09E-02 | 18837 |
| 154 | ACC_pre_R  | -1.297 | -2.707 | 0.113  | 0.719 | -1.803 | -0.013 | 7.14E-02 | 18837 |
| 155 | ACC_sup_L  | -3.080 | -4.670 | -1.490 | 0.811 | -3.797 | -0.028 | 1.47E-04 | 18837 |
| 156 | ACC_sup_R  | -3.014 | -4.661 | -1.367 | 0.840 | -3.588 | -0.026 | 3.35E-04 | 18837 |
| 157 | N_Acc_L    | 0.114  | -0.365 | 0.593  | 0.244 | 0.467  | 0.003  | 6.40E-01 | 18837 |
| 158 | N_Acc_R    | 0.067  | -0.347 | 0.482  | 0.211 | 0.319  | 0.002  | 7.50E-01 | 18837 |
| 159 | VTA_L      | -0.004 | -0.021 | 0.013  | 0.009 | -0.485 | -0.004 | 6.28E-01 | 18837 |
| 160 | VTA_R      | -0.002 | -0.017 | 0.014  | 0.008 | -0.211 | -0.002 | 8.33E-01 | 18837 |
| 161 | SN_pc_L    | -0.021 | -0.048 | 0.006  | 0.014 | -1.491 | -0.011 | 1.36E-01 | 18837 |
| 162 | SN_pc_R    | -0.021 | -0.056 | 0.015  | 0.018 | -1.151 | -0.008 | 2.50E-01 | 18837 |
| 163 | SN_pr_L    | -0.030 | -0.066 | 0.007  | 0.019 | -1.577 | -0.011 | 1.15E-01 | 18837 |
| 164 | SN_pr_R    | -0.009 | -0.051 | 0.032  | 0.021 | -0.450 | -0.003 | 6.52E-01 | 18837 |
| 165 | Red_N_L    | -0.047 | -0.093 | -0.002 | 0.023 | -2.047 | -0.015 | 4.06E-02 | 18837 |
| 166 | Red_N_R    | -0.020 | -0.069 | 0.029  | 0.025 | -0.797 | -0.006 | 4.25E-01 | 18837 |
| 167 | LC_L       | 0.006  | -0.011 | 0.023  | 0.009 | 0.663  | 0.005  | 5.07E-01 | 18837 |

|     |         |        |        |       |       |        |        |          |       |
|-----|---------|--------|--------|-------|-------|--------|--------|----------|-------|
| 168 | LC_R    | 0.006  | -0.012 | 0.025 | 0.009 | 0.680  | 0.005  | 4.96E-01 | 18837 |
| 169 | Raphe_D | -0.029 | -0.094 | 0.037 | 0.033 | -0.861 | -0.006 | 3.89E-01 | 18837 |
| 170 | Raphe_M | 0.006  | -0.014 | 0.025 | 0.010 | 0.545  | 0.004  | 5.86E-01 | 18837 |

---

Table S4: Associations between grey matter volumes and diet phenotypes (baseline), with follow-up diets as covariates.

| Number        | AAL 3 region        | beta     | 95%CI_l  | 95%CI_h | se     | t      | r      | p        | df.e  | beta          | 95%CI_l | 95%CI_h | se     | t     | r     | p        | df.e  |
|---------------|---------------------|----------|----------|---------|--------|--------|--------|----------|-------|---------------|---------|---------|--------|-------|-------|----------|-------|
| Coffee intake |                     |          |          |         |        |        |        |          |       | Cereal intake |         |         |        |       |       |          |       |
| 0             | Total brain         | -163.196 | -261.077 | -65.316 | 49.937 | -3.268 | -0.024 | 1.08E-03 | 18620 | 152.006       | 92.479  | 211.534 | 30.370 | 5.005 | 0.037 | 5.63E-07 | 18704 |
| 1             | Precentral_L        | -3.072   | -6.522   | 0.377   | 1.760  | -1.746 | -0.013 | 8.09E-02 | 18620 | 3.426         | 1.324   | 5.528   | 1.073  | 3.195 | 0.023 | 1.40E-03 | 18704 |
| 2             | Precentral_R        | -2.628   | -5.789   | 0.533   | 1.613  | -1.630 | -0.012 | 1.03E-01 | 18620 | 2.830         | 0.905   | 4.755   | 0.982  | 2.882 | 0.021 | 3.96E-03 | 18704 |
| 3             | Frontal_Sup_2_L     | -5.921   | -9.560   | -2.281  | 1.857  | -3.189 | -0.023 | 1.43E-03 | 18620 | 4.030         | 1.814   | 6.247   | 1.131  | 3.564 | 0.026 | 3.67E-04 | 18704 |
| 4             | Frontal_Sup_2_R     | -5.199   | -9.209   | -1.189  | 2.046  | -2.541 | -0.019 | 1.11E-02 | 18620 | 5.093         | 2.651   | 7.535   | 1.246  | 4.087 | 0.030 | 4.38E-05 | 18704 |
| 5             | Frontal_Mid_2_L     | -4.645   | -8.468   | -0.822  | 1.950  | -2.381 | -0.017 | 1.73E-02 | 18620 | 2.109         | -0.221  | 4.438   | 1.188  | 1.774 | 0.013 | 7.60E-02 | 18704 |
| 6             | Frontal_Mid_2_R     | -4.718   | -9.043   | -0.394  | 2.206  | -2.139 | -0.016 | 3.25E-02 | 18620 | 3.981         | 1.347   | 6.614   | 1.343  | 2.963 | 0.022 | 3.05E-03 | 18704 |
| 7             | Frontal_Inf_Oper_L  | -0.640   | -1.770   | 0.490   | 0.577  | -1.110 | -0.008 | 2.67E-01 | 18620 | 1.015         | 0.327   | 1.704   | 0.351  | 2.889 | 0.021 | 3.86E-03 | 18704 |
| 8             | Frontal_Inf_Oper_R  | -1.717   | -3.135   | -0.299  | 0.723  | -2.373 | -0.017 | 1.76E-02 | 18620 | 0.854         | -0.009  | 1.717   | 0.440  | 1.940 | 0.014 | 5.24E-02 | 18704 |
| 9             | Frontal_Inf_Tri_L   | -1.113   | -3.513   | 1.287   | 1.224  | -0.909 | -0.007 | 3.63E-01 | 18620 | 1.912         | 0.451   | 3.373   | 0.746  | 2.565 | 0.019 | 1.03E-02 | 18704 |
| 10            | Frontal_Inf_Tri_R   | -1.091   | -2.976   | 0.794   | 0.962  | -1.135 | -0.008 | 2.56E-01 | 18620 | 1.614         | 0.467   | 2.762   | 0.586  | 2.757 | 0.020 | 5.84E-03 | 18704 |
| 11            | Frontal_Inf_Orb_2_L | -0.502   | -1.219   | 0.215   | 0.366  | -1.372 | -0.010 | 1.70E-01 | 18620 | 0.387         | -0.050  | 0.824   | 0.223  | 1.737 | 0.013 | 8.24E-02 | 18704 |
| 12            | Frontal_Inf_Orb_2_R | -1.072   | -1.823   | -0.322  | 0.383  | -2.801 | -0.021 | 5.11E-03 | 18620 | 0.618         | 0.161   | 1.075   | 0.233  | 2.652 | 0.019 | 8.01E-03 | 18704 |
| 13            | Rolandic_Oper_L     | -0.514   | -1.600   | 0.572   | 0.554  | -0.928 | -0.007 | 3.53E-01 | 18620 | 1.001         | 0.340   | 1.663   | 0.337  | 2.967 | 0.022 | 3.01E-03 | 18704 |
| 14            | Rolandic_Oper_R     | -1.834   | -3.387   | -0.280  | 0.793  | -2.314 | -0.017 | 2.07E-02 | 18620 | 1.446         | 0.500   | 2.392   | 0.483  | 2.997 | 0.022 | 2.73E-03 | 18704 |
| 15            | Supp_Motor_Area_L   | -2.107   | -4.689   | 0.474   | 1.317  | -1.600 | -0.012 | 1.10E-01 | 18620 | 1.007         | -0.566  | 2.580   | 0.802  | 1.255 | 0.009 | 2.10E-01 | 18704 |
| 16            | Supp_Motor_Area_R   | -2.287   | -5.138   | 0.564   | 1.455  | -1.572 | -0.012 | 1.16E-01 | 18620 | 1.702         | -0.036  | 3.439   | 0.886  | 1.920 | 0.014 | 5.49E-02 | 18704 |
| 17            | Olfactory_L         | -0.215   | -0.599   | 0.169   | 0.196  | -1.098 | -0.008 | 2.72E-01 | 18620 | 0.298         | 0.065   | 0.532   | 0.119  | 2.502 | 0.018 | 1.24E-02 | 18704 |
| 18            | Olfactory_R         | -0.226   | -0.611   | 0.159   | 0.196  | -1.149 | -0.008 | 2.50E-01 | 18620 | 0.246         | 0.012   | 0.480   | 0.120  | 2.058 | 0.015 | 3.96E-02 | 18704 |
| 19            | Frontal_Sup_Media_L | -3.966   | -6.383   | -1.550  | 1.233  | -3.217 | -0.024 | 1.30E-03 | 18620 | 3.105         | 1.635   | 4.575   | 0.750  | 4.140 | 0.030 | 3.48E-05 | 18704 |
| 20            | Frontal_Sup_Media_R | -2.677   | -4.436   | -0.918  | 0.898  | -2.983 | -0.022 | 2.86E-03 | 18620 | 1.932         | 0.861   | 3.002   | 0.546  | 3.535 | 0.026 | 4.08E-04 | 18704 |
| 21            | Frontal_Med_Orb_L   | -0.879   | -1.784   | 0.025   | 0.461  | -1.907 | -0.014 | 5.66E-02 | 18620 | 1.122         | 0.572   | 1.671   | 0.280  | 4.001 | 0.029 | 6.33E-05 | 18704 |
| 22            | Frontal_Med_Orb_R   | -0.789   | -1.900   | 0.322   | 0.567  | -1.391 | -0.010 | 1.64E-01 | 18620 | 1.439         | 0.763   | 2.114   | 0.345  | 4.175 | 0.031 | 2.99E-05 | 18704 |
| 23            | Rectus_L            | -0.844   | -1.780   | 0.091   | 0.477  | -1.769 | -0.013 | 7.69E-02 | 18620 | 0.950         | 0.381   | 1.519   | 0.290  | 3.272 | 0.024 | 1.07E-03 | 18704 |
| 24            | Rectus_R            | -0.676   | -1.541   | 0.189   | 0.441  | -1.533 | -0.011 | 1.25E-01 | 18620 | 0.993         | 0.467   | 1.519   | 0.269  | 3.698 | 0.027 | 2.18E-04 | 18704 |
| 25            | OFCmed_L            | -0.473   | -1.015   | 0.069   | 0.276  | -1.711 | -0.013 | 8.70E-02 | 18620 | 0.426         | 0.096   | 0.756   | 0.168  | 2.529 | 0.018 | 1.15E-02 | 18704 |
| 26            | OFCmed_R            | -0.304   | -0.936   | 0.328   | 0.322  | -0.942 | -0.007 | 3.46E-01 | 18620 | 0.528         | 0.143   | 0.913   | 0.196  | 2.691 | 0.020 | 7.13E-03 | 18704 |
| 27            | OFCant_L            | -0.320   | -0.947   | 0.308   | 0.320  | -0.998 | -0.007 | 3.18E-01 | 18620 | 0.355         | -0.027  | 0.737   | 0.195  | 1.820 | 0.013 | 6.88E-02 | 18704 |
| 28            | OFCant_R            | -0.376   | -1.205   | 0.453   | 0.423  | -0.890 | -0.007 | 3.73E-01 | 18620 | 1.004         | 0.499   | 1.508   | 0.257  | 3.902 | 0.029 | 9.57E-05 | 18704 |
| 29            | OFCpost_L           | -0.314   | -1.099   | 0.471   | 0.401  | -0.784 | -0.006 | 4.33E-01 | 18620 | 0.397         | -0.082  | 0.875   | 0.244  | 1.626 | 0.012 | 1.04E-01 | 18704 |
| 30            | OFCpost_R           | -0.336   | -1.062   | 0.390   | 0.370  | -0.907 | -0.007 | 3.64E-01 | 18620 | 0.629         | 0.187   | 1.071   | 0.225  | 2.792 | 0.020 | 5.25E-03 | 18704 |
| 31            | OFClat_L            | -0.216   | -0.480   | 0.049   | 0.135  | -1.596 | -0.012 | 1.11E-01 | 18620 | 0.174         | 0.013   | 0.335   | 0.082  | 2.115 | 0.015 | 3.45E-02 | 18704 |
| 32            | OFClat_R            | -0.281   | -0.505   | -0.057  | 0.114  | -2.464 | -0.018 | 1.37E-02 | 18620 | 0.306         | 0.170   | 0.442   | 0.069  | 4.407 | 0.032 | 1.05E-05 | 18704 |
| 33            | Insula_L            | -4.212   | -6.634   | -1.789  | 1.236  | -3.408 | -0.025 | 6.56E-04 | 18620 | 2.523         | 1.046   | 4.001   | 0.754  | 3.347 | 0.024 | 8.18E-04 | 18704 |
| 34            | Insula_R            | -4.248   | -6.610   | -1.886  | 1.205  | -3.525 | -0.026 | 4.25E-04 | 18620 | 2.653         | 1.215   | 4.092   | 0.734  | 3.615 | 0.026 | 3.02E-04 | 18704 |
| 37            | Cingulate_Mid_L     | -3.984   | -6.033   | -1.935  | 1.045  | -3.811 | -0.028 | 1.39E-04 | 18620 | 3.045         | 1.798   | 4.292   | 0.636  | 4.785 | 0.035 | 1.73E-06 | 18704 |
| 38            | Cingulate_Mid_R     | -3.903   | -6.088   | -1.717  | 1.115  | -3.500 | -0.026 | 4.67E-04 | 18620 | 3.003         | 1.673   | 4.333   | 0.679  | 4.425 | 0.032 | 9.69E-06 | 18704 |
| 39            | Cingulate_Post_L    | -0.180   | -0.808   | 0.447   | 0.320  | -0.563 | -0.004 | 5.73E-01 | 18620 | 0.488         | 0.106   | 0.870   | 0.195  | 2.504 | 0.018 | 1.23E-02 | 18704 |
| 40            | Cingulate_Post_R    | -0.153   | -0.501   | 0.195   | 0.178  | -0.861 | -0.006 | 3.89E-01 | 18620 | 0.156         | -0.056  | 0.368   | 0.108  | 1.442 | 0.011 | 1.49E-01 | 18704 |
| 41            | Hippocampus_L       | -0.657   | -1.671   | 0.358   | 0.518  | -1.269 | -0.009 | 2.05E-01 | 18620 | 1.084         | 0.466   | 1.701   | 0.315  | 3.440 | 0.025 | 5.82E-04 | 18704 |
| 42            | Hippocampus_R       | -0.302   | -1.355   | 0.750   | 0.537  | -0.563 | -0.004 | 5.73E-01 | 18620 | 0.643         | 0.002   | 1.283   | 0.327  | 1.966 | 0.014 | 4.93E-02 | 18704 |
| 43            | ParaHippocampal_L   | -0.943   | -1.845   | -0.042  | 0.460  | -2.052 | -0.015 | 4.02E-02 | 18620 | 0.902         | 0.354   | 1.451   | 0.280  | 3.224 | 0.024 | 1.27E-03 | 18704 |
| 44            | ParaHippocampal_R   | -0.861   | -1.998   | 0.277   | 0.580  | -1.483 | -0.011 | 1.38E-01 | 18620 | 0.980         | 0.288   | 1.672   | 0.353  | 2.776 | 0.020 | 5.50E-03 | 18704 |
| 45            | Amygdala_L          | -0.478   | -0.828   | -0.128  | 0.179  | -2.675 | -0.020 | 7.48E-03 | 18620 | 0.314         | 0.100   | 0.527   | 0.109  | 2.881 | 0.021 | 3.97E-03 | 18704 |
| 46            | Amygdala_R          | -0.475   | -0.833   | -0.117  | 0.183  | -2.603 | -0.019 | 9.25E-03 | 18620 | 0.284         | 0.066   | 0.502   | 0.111  | 2.550 | 0.019 | 1.08E-02 | 18704 |

|    |                      |        |        |        |       |        |        |          |       |        |        |       |       |        |        |          |       |
|----|----------------------|--------|--------|--------|-------|--------|--------|----------|-------|--------|--------|-------|-------|--------|--------|----------|-------|
| 47 | Calcarine_L          | -1.981 | -5.321 | 1.358  | 1.704 | -1.163 | -0.009 | 2.45E-01 | 18620 | 0.318  | -1.718 | 2.355 | 1.039 | 0.306  | 0.002  | 7.59E-01 | 18704 |
| 48 | Calcarine_R          | -1.633 | -4.424 | 1.157  | 1.424 | -1.147 | -0.008 | 2.51E-01 | 18620 | 0.657  | -1.045 | 2.359 | 0.868 | 0.756  | 0.006  | 4.49E-01 | 18704 |
| 49 | Cuneus_L             | -1.922 | -4.018 | 0.174  | 1.069 | -1.798 | -0.013 | 7.22E-02 | 18620 | 0.303  | -0.974 | 1.580 | 0.652 | 0.465  | 0.003  | 6.42E-01 | 18704 |
| 50 | Cuneus_R             | -1.290 | -2.893 | 0.313  | 0.818 | -1.577 | -0.012 | 1.15E-01 | 18620 | 0.594  | -0.383 | 1.571 | 0.499 | 1.192  | 0.009  | 2.33E-01 | 18704 |
| 51 | Lingual_L            | -1.137 | -3.146 | 0.872  | 1.025 | -1.110 | -0.008 | 2.67E-01 | 18620 | 0.045  | -1.179 | 1.269 | 0.625 | 0.072  | 0.001  | 9.42E-01 | 18704 |
| 52 | Lingual_R            | -0.690 | -2.796 | 1.416  | 1.074 | -0.642 | -0.005 | 5.21E-01 | 18620 | 0.736  | -0.547 | 2.019 | 0.655 | 1.124  | 0.008  | 2.61E-01 | 18704 |
| 53 | Occipital_Sup_L      | -1.160 | -2.541 | 0.222  | 0.705 | -1.646 | -0.012 | 9.99E-02 | 18620 | 0.815  | -0.026 | 1.657 | 0.429 | 1.899  | 0.014  | 5.76E-02 | 18704 |
| 54 | Occipital_Sup_R      | -1.389 | -2.887 | 0.109  | 0.764 | -1.817 | -0.013 | 6.92E-02 | 18620 | 0.907  | -0.005 | 1.819 | 0.465 | 1.949  | 0.014  | 5.13E-02 | 18704 |
| 55 | Occipital_Mid_L      | 0.748  | -2.490 | 3.985  | 1.652 | 0.453  | 0.003  | 6.51E-01 | 18620 | 0.163  | -1.811 | 2.136 | 1.007 | 0.161  | 0.001  | 8.72E-01 | 18704 |
| 56 | Occipital_Mid_R      | 0.124  | -2.128 | 2.376  | 1.149 | 0.108  | 0.001  | 9.14E-01 | 18620 | -0.141 | -1.514 | 1.232 | 0.700 | -0.201 | -0.001 | 8.40E-01 | 18704 |
| 57 | Occipital_Inf_L      | 0.660  | -0.415 | 1.734  | 0.548 | 1.203  | 0.009  | 2.29E-01 | 18620 | -0.455 | -1.111 | 0.200 | 0.334 | -1.361 | -0.010 | 1.73E-01 | 18704 |
| 58 | Occipital_Inf_R      | 0.994  | -0.248 | 2.236  | 0.634 | 1.569  | 0.011  | 1.17E-01 | 18620 | -0.234 | -0.990 | 0.523 | 0.386 | -0.605 | -0.004 | 5.45E-01 | 18704 |
| 59 | Fusiform_L           | -0.888 | -3.240 | 1.464  | 1.200 | -0.740 | -0.005 | 4.59E-01 | 18620 | 2.018  | 0.586  | 3.450 | 0.731 | 2.762  | 0.020  | 5.74E-03 | 18704 |
| 60 | Fusiform_R           | -1.955 | -4.543 | 0.633  | 1.320 | -1.480 | -0.011 | 1.39E-01 | 18620 | 1.015  | -0.558 | 2.588 | 0.803 | 1.265  | 0.009  | 2.06E-01 | 18704 |
| 61 | Postcentral_L        | -5.064 | -8.598 | -1.530 | 1.803 | -2.809 | -0.021 | 4.98E-03 | 18620 | 4.358  | 2.206  | 6.510 | 1.098 | 3.970  | 0.029  | 7.22E-05 | 18704 |
| 62 | Postcentral_R        | -3.280 | -6.908 | 0.347  | 1.851 | -1.773 | -0.013 | 7.63E-02 | 18620 | 3.221  | 1.015  | 5.428 | 1.126 | 2.862  | 0.021  | 4.22E-03 | 18704 |
| 63 | Parietal_Sup_L       | -2.911 | -4.949 | -0.873 | 1.040 | -2.800 | -0.021 | 5.12E-03 | 18620 | -0.579 | -1.821 | 0.663 | 0.634 | -0.914 | -0.007 | 3.61E-01 | 18704 |
| 64 | Parietal_Sup_R       | -0.663 | -2.471 | 1.145  | 0.922 | -0.719 | -0.005 | 4.72E-01 | 18620 | 0.161  | -0.941 | 1.263 | 0.562 | 0.286  | 0.002  | 7.75E-01 | 18704 |
| 65 | Parietal_Inf_L       | -2.804 | -5.470 | -0.137 | 1.360 | -2.061 | -0.015 | 3.93E-02 | 18620 | 2.212  | 0.587  | 3.836 | 0.829 | 2.668  | 0.020  | 7.63E-03 | 18704 |
| 66 | Parietal_Inf_R       | -1.308 | -3.037 | 0.420  | 0.882 | -1.483 | -0.011 | 1.38E-01 | 18620 | 2.229  | 1.176  | 3.282 | 0.537 | 4.150  | 0.030  | 3.34E-05 | 18704 |
| 67 | SupraMarginal_L      | -0.576 | -2.140 | 0.988  | 0.798 | -0.722 | -0.005 | 4.70E-01 | 18620 | 1.372  | 0.421  | 2.324 | 0.486 | 2.826  | 0.021  | 4.72E-03 | 18704 |
| 68 | SupraMarginal_R      | -1.975 | -4.189 | 0.238  | 1.129 | -1.749 | -0.013 | 8.03E-02 | 18620 | 3.567  | 2.222  | 4.912 | 0.686 | 5.197  | 0.038  | 2.05E-07 | 18704 |
| 69 | Angular_L            | -1.069 | -2.605 | 0.467  | 0.784 | -1.364 | -0.010 | 1.73E-01 | 18620 | 0.244  | -0.692 | 1.181 | 0.478 | 0.511  | 0.004  | 6.09E-01 | 18704 |
| 70 | Angular_R            | -0.331 | -2.392 | 1.730  | 1.051 | -0.315 | -0.002 | 7.53E-01 | 18620 | 0.726  | -0.530 | 1.981 | 0.641 | 1.133  | 0.008  | 2.57E-01 | 18704 |
| 71 | Precuneus_L          | -3.909 | -7.654 | -0.165 | 1.910 | -2.046 | -0.015 | 4.07E-02 | 18620 | 0.651  | -1.630 | 2.932 | 1.164 | 0.559  | 0.004  | 5.76E-01 | 18704 |
| 72 | Precuneus_R          | -3.090 | -6.426 | 0.246  | 1.702 | -1.816 | -0.013 | 6.94E-02 | 18620 | 0.155  | -1.877 | 2.187 | 1.037 | 0.150  | 0.001  | 8.81E-01 | 18704 |
| 73 | Paracentral_Lobule_L | -0.902 | -2.617 | 0.814  | 0.875 | -1.030 | -0.008 | 3.03E-01 | 18620 | -0.173 | -1.219 | 0.872 | 0.533 | -0.324 | -0.002 | 7.46E-01 | 18704 |
| 74 | Paracentral_Lobule_R | -0.767 | -1.996 | 0.462  | 0.627 | -1.224 | -0.009 | 2.21E-01 | 18620 | -0.148 | -0.897 | 0.600 | 0.382 | -0.389 | -0.003 | 6.98E-01 | 18704 |
| 75 | Caudate_L            | -1.347 | -2.718 | 0.023  | 0.699 | -1.927 | -0.014 | 5.40E-02 | 18620 | -0.383 | -1.218 | 0.452 | 0.426 | -0.899 | -0.007 | 3.69E-01 | 18704 |
| 76 | Caudate_R            | -1.439 | -2.991 | 0.112  | 0.792 | -1.818 | -0.013 | 6.91E-02 | 18620 | -0.586 | -1.531 | 0.360 | 0.482 | -1.214 | -0.009 | 2.25E-01 | 18704 |
| 77 | Putamen_L            | -3.512 | -5.590 | -1.435 | 1.060 | -3.313 | -0.024 | 9.23E-04 | 18620 | 2.349  | 1.083  | 3.616 | 0.646 | 3.636  | 0.027  | 2.77E-04 | 18704 |
| 78 | Putamen_R            | -3.776 | -5.892 | -1.661 | 1.079 | -3.499 | -0.026 | 4.69E-04 | 18620 | 2.157  | 0.866  | 3.447 | 0.658 | 3.277  | 0.024  | 1.05E-03 | 18704 |
| 79 | Pallidum_L           | -0.090 | -0.275 | 0.095  | 0.094 | -0.952 | -0.007 | 3.41E-01 | 18620 | 0.114  | 0.001  | 0.226 | 0.057 | 1.975  | 0.014  | 4.83E-02 | 18704 |
| 80 | Pallidum_R           | -0.185 | -0.388 | 0.017  | 0.104 | -1.792 | -0.013 | 7.32E-02 | 18620 | 0.090  | -0.034 | 0.213 | 0.063 | 1.421  | 0.010  | 1.55E-01 | 18704 |
| 83 | Heschl_L             | -0.372 | -0.747 | 0.003  | 0.191 | -1.944 | -0.014 | 5.19E-02 | 18620 | 0.324  | 0.095  | 0.552 | 0.117 | 2.779  | 0.020  | 5.46E-03 | 18704 |
| 84 | Heschl_R             | -0.357 | -0.776 | 0.062  | 0.214 | -1.671 | -0.012 | 9.46E-02 | 18620 | 0.417  | 0.162  | 0.672 | 0.130 | 3.207  | 0.023  | 1.35E-03 | 18704 |
| 85 | Temporal_Sup_L       | -3.083 | -5.788 | -0.378 | 1.380 | -2.234 | -0.016 | 2.55E-02 | 18620 | 1.714  | 0.066  | 3.362 | 0.841 | 2.039  | 0.015  | 4.15E-02 | 18704 |
| 86 | Temporal_Sup_R       | -1.834 | -4.827 | 1.159  | 1.527 | -1.201 | -0.009 | 2.30E-01 | 18620 | 4.530  | 2.708  | 6.352 | 0.929 | 4.874  | 0.036  | 1.10E-06 | 18704 |
| 87 | Temporal_Pole_Sup_L  | -1.497 | -2.778 | -0.215 | 0.654 | -2.289 | -0.017 | 2.21E-02 | 18620 | 1.150  | 0.370  | 1.931 | 0.398 | 2.888  | 0.021  | 3.88E-03 | 18704 |
| 88 | Temporal_Pole_Sup_R  | -1.376 | -2.725 | -0.027 | 0.688 | -1.999 | -0.015 | 4.57E-02 | 18620 | 0.906  | 0.084  | 1.728 | 0.419 | 2.161  | 0.016  | 3.07E-02 | 18704 |
| 89 | Temporal_Mid_L       | -2.187 | -6.699 | 2.325  | 2.302 | -0.950 | -0.007 | 3.42E-01 | 18620 | 4.717  | 1.970  | 7.464 | 1.402 | 3.366  | 0.025  | 7.66E-04 | 18704 |
| 90 | Temporal_Mid_R       | -1.548 | -5.552 | 2.456  | 2.043 | -0.758 | -0.006 | 4.49E-01 | 18620 | 3.994  | 1.555  | 6.434 | 1.245 | 3.209  | 0.023  | 1.33E-03 | 18704 |
| 91 | Temporal_Pole_Mid_L  | -0.304 | -1.382 | 0.774  | 0.550 | -0.553 | -0.004 | 5.80E-01 | 18620 | 0.827  | 0.171  | 1.484 | 0.335 | 2.469  | 0.018  | 1.35E-02 | 18704 |
| 92 | Temporal_Pole_Mid_R  | -1.010 | -2.320 | 0.299  | 0.668 | -1.512 | -0.011 | 1.30E-01 | 18620 | 1.342  | 0.545  | 2.139 | 0.407 | 3.300  | 0.024  | 9.67E-04 | 18704 |
| 93 | Temporal_Inf_L       | 0.534  | -2.569 | 3.636  | 1.583 | 0.337  | 0.002  | 7.36E-01 | 18620 | 1.162  | -0.728 | 3.052 | 0.964 | 1.205  | 0.009  | 2.28E-01 | 18704 |
| 94 | Temporal_Inf_R       | -2.347 | -5.730 | 1.035  | 1.726 | -1.360 | -0.010 | 1.74E-01 | 18620 | 1.526  | -0.534 | 3.587 | 1.051 | 1.452  | 0.011  | 1.47E-01 | 18704 |
| 95 | Cerebellum_Crus1_L   | -2.425 | -6.108 | 1.258  | 1.879 | -1.291 | -0.009 | 1.97E-01 | 18620 | 2.629  | 0.385  | 4.873 | 1.145 | 2.296  | 0.017  | 2.17E-02 | 18704 |
| 96 | Cerebellum_Crus1_R   | -4.372 | -8.129 | -0.615 | 1.917 | -2.281 | -0.017 | 2.26E-02 | 18620 | 3.106  | 0.818  | 5.394 | 1.167 | 2.661  | 0.019  | 7.80E-03 | 18704 |
| 97 | Cerebellum_Crus2_L   | -3.519 | -6.443 | -0.595 | 1.492 | -2.359 | -0.017 | 1.83E-02 | 18620 | 3.041  | 1.263  | 4.820 | 0.907 | 3.352  | 0.025  | 8.04E-04 | 18704 |

|     |                    |        |        |        |       |        |        |          |       |        |        |        |       |        |        |          |       |
|-----|--------------------|--------|--------|--------|-------|--------|--------|----------|-------|--------|--------|--------|-------|--------|--------|----------|-------|
| 98  | Cerebellum_Crus2_R | -2.321 | -5.026 | 0.384  | 1.380 | -1.682 | -0.012 | 9.27E-02 | 18620 | 3.445  | 1.799  | 5.090  | 0.839 | 4.104  | 0.030  | 4.08E-05 | 18704 |
| 99  | Cerebellum_3_L     | -0.004 | -0.200 | 0.193  | 0.100 | -0.035 | 0.000  | 9.72E-01 | 18620 | 0.089  | -0.030 | 0.209  | 0.061 | 1.464  | 0.011  | 1.43E-01 | 18704 |
| 100 | Cerebellum_3_R     | -0.112 | -0.377 | 0.153  | 0.135 | -0.828 | -0.006 | 4.08E-01 | 18620 | 0.136  | -0.025 | 0.298  | 0.082 | 1.659  | 0.012  | 9.72E-02 | 18704 |
| 101 | Cerebellum_4_5_L   | 0.844  | -0.744 | 2.432  | 0.810 | 1.042  | 0.008  | 2.97E-01 | 18620 | 0.395  | -0.571 | 1.362  | 0.493 | 0.802  | 0.006  | 4.23E-01 | 18704 |
| 102 | Cerebellum_4_5_R   | -0.026 | -1.320 | 1.267  | 0.660 | -0.040 | 0.000  | 9.68E-01 | 18620 | 0.519  | -0.268 | 1.306  | 0.402 | 1.292  | 0.009  | 1.96E-01 | 18704 |
| 103 | Cerebellum_6_L     | -0.725 | -3.467 | 2.017  | 1.399 | -0.518 | -0.004 | 6.04E-01 | 18620 | 1.659  | -0.011 | 3.329  | 0.852 | 1.947  | 0.014  | 5.15E-02 | 18704 |
| 104 | Cerebellum_6_R     | -1.153 | -4.043 | 1.737  | 1.474 | -0.782 | -0.006 | 4.34E-01 | 18620 | 1.779  | 0.021  | 3.538  | 0.897 | 1.983  | 0.015  | 4.74E-02 | 18704 |
| 105 | Cerebellum_7b_L    | -0.411 | -1.305 | 0.483  | 0.456 | -0.901 | -0.007 | 3.68E-01 | 18620 | 0.917  | 0.373  | 1.461  | 0.277 | 3.306  | 0.024  | 9.47E-04 | 18704 |
| 106 | Cerebellum_7b_R    | -0.714 | -1.600 | 0.172  | 0.452 | -1.579 | -0.012 | 1.14E-01 | 18620 | 1.161  | 0.622  | 1.699  | 0.275 | 4.224  | 0.031  | 2.42E-05 | 18704 |
| 107 | Cerebellum_8_L     | 0.145  | -2.693 | 2.982  | 1.448 | 0.100  | 0.001  | 9.20E-01 | 18620 | 2.756  | 1.029  | 4.483  | 0.881 | 3.128  | 0.023  | 1.76E-03 | 18704 |
| 108 | Cerebellum_8_R     | -2.561 | -6.252 | 1.130  | 1.883 | -1.360 | -0.010 | 1.74E-01 | 18620 | 4.365  | 2.119  | 6.612  | 1.146 | 3.808  | 0.028  | 1.40E-04 | 18704 |
| 109 | Cerebellum_9_L     | 0.962  | -0.640 | 2.564  | 0.817 | 1.177  | 0.009  | 2.39E-01 | 18620 | 0.938  | -0.039 | 1.916  | 0.499 | 1.881  | 0.014  | 6.00E-02 | 18704 |
| 110 | Cerebellum_9_R     | 0.893  | -0.681 | 2.468  | 0.803 | 1.112  | 0.008  | 2.66E-01 | 18620 | 0.736  | -0.225 | 1.697  | 0.490 | 1.502  | 0.011  | 1.33E-01 | 18704 |
| 111 | Cerebellum_10_L    | -0.025 | -0.138 | 0.089  | 0.058 | -0.423 | -0.003 | 6.73E-01 | 18620 | -0.008 | -0.077 | 0.061  | 0.035 | -0.226 | -0.002 | 8.21E-01 | 18704 |
| 112 | Cerebellum_10_R    | -0.030 | -0.148 | 0.089  | 0.060 | -0.489 | -0.004 | 6.25E-01 | 18620 | -0.020 | -0.092 | 0.052  | 0.037 | -0.545 | -0.004 | 5.85E-01 | 18704 |
| 113 | Vermis_1_2         | -0.067 | -0.141 | 0.007  | 0.038 | -1.778 | -0.013 | 7.54E-02 | 18620 | 0.036  | -0.009 | 0.081  | 0.023 | 1.583  | 0.012  | 1.13E-01 | 18704 |
| 114 | Vermis_3           | -0.071 | -0.365 | 0.223  | 0.150 | -0.471 | -0.003 | 6.38E-01 | 18620 | 0.185  | 0.006  | 0.364  | 0.091 | 2.021  | 0.015  | 4.33E-02 | 18704 |
| 115 | Vermis_4_5         | 0.649  | -0.216 | 1.514  | 0.441 | 1.471  | 0.011  | 1.41E-01 | 18620 | 0.170  | -0.357 | 0.696  | 0.269 | 0.631  | 0.005  | 5.28E-01 | 18704 |
| 116 | Vermis_6           | 0.383  | -0.098 | 0.864  | 0.245 | 1.562  | 0.011  | 1.18E-01 | 18620 | 0.014  | -0.279 | 0.307  | 0.150 | 0.096  | 0.001  | 9.24E-01 | 18704 |
| 117 | Vermis_7           | 0.090  | -0.182 | 0.362  | 0.139 | 0.650  | 0.005  | 5.16E-01 | 18620 | 0.085  | -0.081 | 0.251  | 0.085 | 1.004  | 0.007  | 3.15E-01 | 18704 |
| 118 | Vermis_8           | 0.265  | -0.182 | 0.712  | 0.228 | 1.162  | 0.009  | 2.45E-01 | 18620 | 0.165  | -0.107 | 0.438  | 0.139 | 1.189  | 0.009  | 2.34E-01 | 18704 |
| 119 | Vermis_9           | 0.196  | -0.166 | 0.558  | 0.185 | 1.061  | 0.008  | 2.89E-01 | 18620 | 0.287  | 0.067  | 0.508  | 0.113 | 2.551  | 0.019  | 1.08E-02 | 18704 |
| 120 | Vermis_10          | 0.027  | -0.074 | 0.128  | 0.052 | 0.520  | 0.004  | 6.03E-01 | 18620 | 0.043  | -0.019 | 0.104  | 0.031 | 1.360  | 0.010  | 1.74E-01 | 18704 |
| 121 | Tha_AV_L           | -0.063 | -0.104 | -0.023 | 0.021 | -3.073 | -0.023 | 2.12E-03 | 18620 | 0.013  | -0.012 | 0.037  | 0.013 | 1.001  | 0.007  | 3.17E-01 | 18704 |
| 122 | Tha_AV_R           | -0.077 | -0.135 | -0.019 | 0.029 | -2.612 | -0.019 | 9.00E-03 | 18620 | 0.015  | -0.020 | 0.050  | 0.018 | 0.851  | 0.006  | 3.95E-01 | 18704 |
| 123 | Tha_LP_L           | -0.077 | -0.122 | -0.033 | 0.023 | -3.387 | -0.025 | 7.09E-04 | 18620 | 0.051  | 0.023  | 0.078  | 0.014 | 3.645  | 0.027  | 2.68E-04 | 18704 |
| 124 | Tha_LP_R           | -0.108 | -0.166 | -0.049 | 0.030 | -3.617 | -0.026 | 2.99E-04 | 18620 | 0.074  | 0.038  | 0.109  | 0.018 | 4.053  | 0.030  | 5.09E-05 | 18704 |
| 125 | Tha_VA_L           | -0.011 | -0.059 | 0.037  | 0.024 | -0.440 | -0.003 | 6.60E-01 | 18620 | -0.031 | -0.060 | -0.002 | 0.015 | -2.064 | -0.015 | 3.90E-02 | 18704 |
| 126 | Tha_VA_R           | -0.006 | -0.065 | 0.053  | 0.030 | -0.205 | -0.002 | 8.37E-01 | 18620 | -0.039 | -0.075 | -0.003 | 0.018 | -2.150 | -0.016 | 3.15E-02 | 18704 |
| 127 | Tha_VL_L           | -0.154 | -0.290 | -0.018 | 0.069 | -2.212 | -0.016 | 2.70E-02 | 18620 | 0.082  | -0.001 | 0.164  | 0.042 | 1.927  | 0.014  | 5.40E-02 | 18704 |
| 128 | Tha_VL_R           | -0.247 | -0.427 | -0.066 | 0.092 | -2.674 | -0.020 | 7.51E-03 | 18620 | 0.137  | 0.027  | 0.247  | 0.056 | 2.436  | 0.018  | 1.48E-02 | 18704 |
| 129 | Tha_VPL_L          | -0.148 | -0.310 | 0.014  | 0.083 | -1.796 | -0.013 | 7.25E-02 | 18620 | 0.238  | 0.139  | 0.337  | 0.050 | 4.726  | 0.035  | 2.31E-06 | 18704 |
| 130 | Tha_VPL_R          | -0.258 | -0.428 | -0.088 | 0.087 | -2.970 | -0.022 | 2.98E-03 | 18620 | 0.227  | 0.124  | 0.331  | 0.053 | 4.295  | 0.031  | 1.75E-05 | 18704 |
| 131 | Tha_IL_L           | -0.131 | -0.201 | -0.061 | 0.036 | -3.669 | -0.027 | 2.44E-04 | 18620 | 0.100  | 0.057  | 0.142  | 0.022 | 4.577  | 0.033  | 4.76E-06 | 18704 |
| 132 | Tha_IL_R           | -0.200 | -0.280 | -0.121 | 0.040 | -4.948 | -0.036 | 7.56E-07 | 18620 | 0.116  | 0.067  | 0.164  | 0.025 | 4.684  | 0.034  | 2.84E-06 | 18704 |
| 133 | Tha_Re_L           | 0.000  | 0.000  | 0.000  | 0.000 | -0.513 | -0.004 | 6.08E-01 | 18620 | 0.000  | 0.000  | 0.000  | 0.000 | 0.298  | 0.002  | 7.66E-01 | 18704 |
| 134 | Tha_Re_R           | -0.003 | -0.005 | -0.001 | 0.001 | -2.434 | -0.018 | 1.49E-02 | 18620 | 0.001  | 0.000  | 0.003  | 0.001 | 1.878  | 0.014  | 6.04E-02 | 18704 |
| 135 | Tha_MDm_L          | -1.291 | -1.810 | -0.773 | 0.264 | -4.884 | -0.036 | 1.05E-06 | 18620 | 0.760  | 0.444  | 1.076  | 0.161 | 4.714  | 0.034  | 2.44E-06 | 18704 |
| 136 | Tha_MDm_R          | -1.568 | -2.170 | -0.966 | 0.307 | -5.105 | -0.037 | 3.34E-07 | 18620 | 0.864  | 0.497  | 1.231  | 0.187 | 4.614  | 0.034  | 3.97E-06 | 18704 |
| 137 | Tha_MDI_L          | -0.233 | -0.323 | -0.144 | 0.046 | -5.096 | -0.037 | 3.51E-07 | 18620 | 0.151  | 0.096  | 0.205  | 0.028 | 5.395  | 0.039  | 6.92E-08 | 18704 |
| 138 | Tha_MDI_R          | -0.263 | -0.365 | -0.161 | 0.052 | -5.052 | -0.037 | 4.41E-07 | 18620 | 0.163  | 0.101  | 0.226  | 0.032 | 5.156  | 0.038  | 2.55E-07 | 18704 |
| 139 | Tha_LGN_L          | -0.007 | -0.020 | 0.007  | 0.007 | -0.943 | -0.007 | 3.46E-01 | 18620 | 0.009  | 0.001  | 0.018  | 0.004 | 2.176  | 0.016  | 2.96E-02 | 18704 |
| 140 | Tha_LGN_R          | -0.021 | -0.050 | 0.008  | 0.015 | -1.412 | -0.010 | 1.58E-01 | 18620 | 0.034  | 0.016  | 0.052  | 0.009 | 3.785  | 0.028  | 1.54E-04 | 18704 |
| 141 | Tha_MGN_L          | -0.024 | -0.049 | 0.000  | 0.012 | -1.962 | -0.014 | 4.98E-02 | 18620 | 0.037  | 0.022  | 0.052  | 0.008 | 4.918  | 0.036  | 8.80E-07 | 18704 |
| 142 | Tha_MGN_R          | -0.041 | -0.068 | -0.015 | 0.013 | -3.049 | -0.022 | 2.30E-03 | 18620 | 0.037  | 0.021  | 0.053  | 0.008 | 4.551  | 0.033  | 5.37E-06 | 18704 |
| 143 | Tha_PuA_L          | -0.030 | -0.059 | -0.002 | 0.015 | -2.075 | -0.015 | 3.80E-02 | 18620 | 0.042  | 0.025  | 0.060  | 0.009 | 4.736  | 0.035  | 2.20E-06 | 18704 |
| 144 | Tha_PuA_R          | -0.101 | -0.161 | -0.041 | 0.030 | -3.315 | -0.024 | 9.18E-04 | 18620 | 0.083  | 0.047  | 0.120  | 0.019 | 4.488  | 0.033  | 7.23E-06 | 18704 |
| 145 | Tha_PuM_L          | -0.935 | -1.505 | -0.364 | 0.291 | -3.211 | -0.024 | 1.33E-03 | 18620 | 0.810  | 0.463  | 1.158  | 0.177 | 4.568  | 0.033  | 4.95E-06 | 18704 |
| 146 | Tha_PuM_R          | -1.457 | -2.168 | -0.746 | 0.363 | -4.017 | -0.029 | 5.92E-05 | 18620 | 0.934  | 0.501  | 1.368  | 0.221 | 4.226  | 0.031  | 2.39E-05 | 18704 |

|     |            |        |        |        |       |        |        |          |       |        |        |       |       |        |        |          |       |
|-----|------------|--------|--------|--------|-------|--------|--------|----------|-------|--------|--------|-------|-------|--------|--------|----------|-------|
| 147 | Thal_PuL_L | -0.193 | -0.297 | -0.088 | 0.053 | -3.626 | -0.027 | 2.89E-04 | 18620 | 0.163  | 0.100  | 0.227 | 0.032 | 5.039  | 0.037  | 4.72E-07 | 18704 |
| 148 | Thal_PuL_R | -0.370 | -0.536 | -0.205 | 0.084 | -4.382 | -0.032 | 1.18E-05 | 18620 | 0.244  | 0.143  | 0.345 | 0.051 | 4.745  | 0.035  | 2.10E-06 | 18704 |
| 149 | Thal_PuL_L | -0.015 | -0.044 | 0.013  | 0.014 | -1.068 | -0.008 | 2.86E-01 | 18620 | 0.028  | 0.011  | 0.046 | 0.009 | 3.204  | 0.023  | 1.36E-03 | 18704 |
| 150 | Thal_PuL_R | -0.024 | -0.061 | 0.014  | 0.019 | -1.229 | -0.009 | 2.19E-01 | 18620 | 0.030  | 0.007  | 0.053 | 0.012 | 2.549  | 0.019  | 1.08E-02 | 18704 |
| 151 | ACC_sub_L  | 0.052  | -0.275 | 0.379  | 0.167 | 0.314  | 0.002  | 7.54E-01 | 18620 | 0.089  | -0.111 | 0.288 | 0.102 | 0.870  | 0.006  | 3.84E-01 | 18704 |
| 152 | ACC_sub_R  | -0.050 | -0.355 | 0.256  | 0.156 | -0.319 | -0.002 | 7.50E-01 | 18620 | 0.068  | -0.118 | 0.255 | 0.095 | 0.720  | 0.005  | 4.71E-01 | 18704 |
| 153 | ACC_pre_L  | -0.508 | -1.346 | 0.330  | 0.428 | -1.189 | -0.009 | 2.34E-01 | 18620 | 1.053  | 0.542  | 1.563 | 0.260 | 4.043  | 0.030  | 5.30E-05 | 18704 |
| 154 | ACC_pre_R  | -0.636 | -1.444 | 0.171  | 0.412 | -1.545 | -0.011 | 1.22E-01 | 18620 | 0.816  | 0.324  | 1.307 | 0.251 | 3.251  | 0.024  | 1.15E-03 | 18704 |
| 155 | ACC_sup_L  | -0.798 | -1.708 | 0.112  | 0.464 | -1.719 | -0.013 | 8.57E-02 | 18620 | 0.772  | 0.217  | 1.327 | 0.283 | 2.728  | 0.020  | 6.38E-03 | 18704 |
| 156 | ACC_sup_R  | -0.077 | -1.020 | 0.866  | 0.481 | -0.160 | -0.001 | 8.73E-01 | 18620 | 0.426  | -0.149 | 1.002 | 0.294 | 1.453  | 0.011  | 1.46E-01 | 18704 |
| 157 | N_Acc_L    | -0.268 | -0.542 | 0.007  | 0.140 | -1.911 | -0.014 | 5.60E-02 | 18620 | 0.266  | 0.099  | 0.433 | 0.085 | 3.120  | 0.023  | 1.81E-03 | 18704 |
| 158 | N_Acc_R    | -0.214 | -0.451 | 0.024  | 0.121 | -1.766 | -0.013 | 7.75E-02 | 18620 | 0.261  | 0.117  | 0.406 | 0.074 | 3.545  | 0.026  | 3.94E-04 | 18704 |
| 159 | VTA_L      | -0.012 | -0.022 | -0.002 | 0.005 | -2.431 | -0.018 | 1.51E-02 | 18620 | 0.008  | 0.002  | 0.014 | 0.003 | 2.706  | 0.020  | 6.82E-03 | 18704 |
| 160 | VTA_R      | -0.014 | -0.022 | -0.005 | 0.004 | -3.070 | -0.022 | 2.14E-03 | 18620 | 0.008  | 0.003  | 0.013 | 0.003 | 2.999  | 0.022  | 2.71E-03 | 18704 |
| 161 | SN_pc_L    | -0.025 | -0.041 | -0.010 | 0.008 | -3.190 | -0.023 | 1.42E-03 | 18620 | 0.013  | 0.003  | 0.022 | 0.005 | 2.623  | 0.019  | 8.73E-03 | 18704 |
| 162 | SN_pc_R    | -0.033 | -0.054 | -0.013 | 0.010 | -3.204 | -0.023 | 1.36E-03 | 18620 | 0.020  | 0.008  | 0.033 | 0.006 | 3.190  | 0.023  | 1.43E-03 | 18704 |
| 163 | SN_pr_L    | -0.021 | -0.042 | 0.000  | 0.011 | -1.970 | -0.014 | 4.88E-02 | 18620 | 0.011  | -0.001 | 0.024 | 0.007 | 1.741  | 0.013  | 8.17E-02 | 18704 |
| 164 | SN_pr_R    | -0.026 | -0.050 | -0.003 | 0.012 | -2.179 | -0.016 | 2.93E-02 | 18620 | 0.016  | 0.002  | 0.030 | 0.007 | 2.181  | 0.016  | 2.92E-02 | 18704 |
| 165 | Red_N_L    | -0.035 | -0.061 | -0.009 | 0.013 | -2.642 | -0.019 | 8.24E-03 | 18620 | 0.019  | 0.003  | 0.035 | 0.008 | 2.341  | 0.017  | 1.93E-02 | 18704 |
| 166 | Red_N_R    | -0.050 | -0.078 | -0.021 | 0.014 | -3.442 | -0.025 | 5.78E-04 | 18620 | 0.023  | 0.005  | 0.040 | 0.009 | 2.565  | 0.019  | 1.03E-02 | 18704 |
| 167 | LC_L       | -0.009 | -0.019 | 0.001  | 0.005 | -1.856 | -0.014 | 6.35E-02 | 18620 | -0.001 | -0.007 | 0.005 | 0.003 | -0.379 | -0.003 | 7.05E-01 | 18704 |
| 168 | LC_R       | -0.005 | -0.016 | 0.005  | 0.005 | -0.968 | -0.007 | 3.33E-01 | 18620 | -0.003 | -0.009 | 0.004 | 0.003 | -0.866 | -0.006 | 3.87E-01 | 18704 |
| 169 | Raphe_D    | -0.070 | -0.107 | -0.032 | 0.019 | -3.627 | -0.027 | 2.88E-04 | 18620 | 0.043  | 0.020  | 0.066 | 0.012 | 3.671  | 0.027  | 2.42E-04 | 18704 |
| 170 | Raphe_M    | -0.011 | -0.022 | 0.001  | 0.006 | -1.818 | -0.013 | 6.91E-02 | 18620 | 0.003  | -0.004 | 0.010 | 0.004 | 0.840  | 0.006  | 4.01E-01 | 18704 |

| Tea intake |                      |         |          |         |        |        |        |          |       | Water intake |          |         |        |        |        |          |       |
|------------|----------------------|---------|----------|---------|--------|--------|--------|----------|-------|--------------|----------|---------|--------|--------|--------|----------|-------|
| Number     | AAL 3 region         | beta    | 95%CI l  | 95%CI h | se     | t      | r      | p        | df.e  | beta         | 95%CI l  | 95%CI h | se     | t      | r      | p        | df.e  |
| 0          | Total brain          | -56.022 | -131.197 | 19.154  | 38.353 | -1.461 | -0.011 | 1.44E-01 | 18590 | -36.753      | -123.744 | 50.238  | 44.381 | -0.828 | -0.006 | 4.08E-01 | 18531 |
| 1          | Precentral_L         | -1.083  | -3.729   | 1.564   | 1.350  | -0.802 | -0.006 | 4.23E-01 | 18590 | -1.344       | -4.409   | 1.722   | 1.564  | -0.859 | -0.006 | 3.90E-01 | 18531 |
| 2          | Precentral_R         | -0.206  | -2.632   | 2.220   | 1.238  | -0.166 | -0.001 | 8.68E-01 | 18590 | -1.718       | -4.528   | 1.091   | 1.433  | -1.199 | -0.009 | 2.31E-01 | 18531 |
| 3          | Frontal_Sup_2_L      | -0.375  | -3.169   | 2.418   | 1.425  | -0.263 | -0.002 | 7.92E-01 | 18590 | -2.760       | -5.999   | 0.479   | 1.652  | -1.670 | -0.012 | 9.48E-02 | 18531 |
| 4          | Frontal_Sup_2_R      | -0.262  | -3.342   | 2.818   | 1.571  | -0.167 | -0.001 | 8.68E-01 | 18590 | -2.328       | -5.898   | 1.243   | 1.822  | -1.278 | -0.009 | 2.01E-01 | 18531 |
| 5          | Frontal_Mid_2_L      | -1.750  | -4.684   | 1.184   | 1.497  | -1.169 | -0.009 | 2.42E-01 | 18590 | -0.076       | -3.478   | 3.325   | 1.736  | -0.044 | 0.000  | 9.65E-01 | 18531 |
| 6          | Frontal_Mid_2_R      | -0.394  | -3.714   | 2.926   | 1.694  | -0.233 | -0.002 | 8.16E-01 | 18590 | -0.972       | -4.819   | 2.876   | 1.963  | -0.495 | -0.004 | 6.21E-01 | 18531 |
| 7          | Frontal_Inf_Oper_L   | -0.297  | -1.164   | 0.570   | 0.442  | -0.671 | -0.005 | 5.02E-01 | 18590 | -0.940       | -1.944   | 0.064   | 0.512  | -1.835 | -0.013 | 6.66E-02 | 18531 |
| 8          | Frontal_Inf_Oper_R   | -0.816  | -1.902   | 0.271   | 0.554  | -1.471 | -0.011 | 1.41E-01 | 18590 | -1.013       | -2.273   | 0.247   | 0.643  | -1.576 | -0.012 | 1.15E-01 | 18531 |
| 9          | Frontal_Inf_Tri_L    | -1.185  | -3.028   | 0.658   | 0.940  | -1.260 | -0.009 | 2.08E-01 | 18590 | -1.062       | -3.196   | 1.073   | 1.089  | -0.975 | -0.007 | 3.30E-01 | 18531 |
| 10         | Frontal_Inf_Tri_R    | -0.989  | -2.434   | 0.457   | 0.738  | -1.340 | -0.010 | 1.80E-01 | 18590 | -1.137       | -2.812   | 0.538   | 0.855  | -1.330 | -0.010 | 1.84E-01 | 18531 |
| 11         | Frontal_Inf_Orb_2_L  | -0.209  | -0.761   | 0.342   | 0.281  | -0.745 | -0.005 | 4.56E-01 | 18590 | -0.218       | -0.856   | 0.420   | 0.326  | -0.669 | -0.005 | 5.03E-01 | 18531 |
| 12         | Frontal_Inf_Orb_2_R  | -0.188  | -0.764   | 0.388   | 0.294  | -0.640 | -0.005 | 5.22E-01 | 18590 | -0.059       | -0.726   | 0.608   | 0.340  | -0.173 | -0.001 | 8.62E-01 | 18531 |
| 13         | Rolandic_Oper_L      | -0.819  | -1.652   | 0.014   | 0.425  | -1.928 | -0.014 | 5.39E-02 | 18590 | 0.205        | -0.760   | 1.169   | 0.492  | 0.416  | 0.003  | 6.78E-01 | 18531 |
| 14         | Rolandic_Oper_R      | 0.134   | -1.057   | 1.324   | 0.607  | 0.220  | 0.002  | 8.26E-01 | 18590 | -0.385       | -1.764   | 0.994   | 0.704  | -0.547 | -0.004 | 5.84E-01 | 18531 |
| 15         | Supp_Motor_Area_L    | -0.839  | -2.818   | 1.140   | 1.010  | -0.831 | -0.006 | 4.06E-01 | 18590 | -1.603       | -3.897   | 0.692   | 1.170  | -1.369 | -0.010 | 1.71E-01 | 18531 |
| 16         | Supp_Motor_Area_R    | -1.301  | -3.489   | 0.886   | 1.116  | -1.166 | -0.009 | 2.44E-01 | 18590 | -1.498       | -4.034   | 1.037   | 1.294  | -1.158 | -0.009 | 2.47E-01 | 18531 |
| 17         | Olfactory_L          | -0.108  | -0.402   | 0.187   | 0.150  | -0.717 | -0.005 | 4.73E-01 | 18590 | -0.273       | -0.614   | 0.068   | 0.174  | -1.570 | -0.012 | 1.16E-01 | 18531 |
| 18         | Olfactory_R          | -0.165  | -0.460   | 0.130   | 0.151  | -1.095 | -0.008 | 2.74E-01 | 18590 | -0.369       | -0.711   | -0.027  | 0.174  | -2.116 | -0.016 | 3.44E-02 | 18531 |
| 19         | Frontal_Sup_MediaL_L | -2.239  | -4.094   | -0.384  | 0.947  | -2.366 | -0.017 | 1.80E-02 | 18590 | -1.787       | -3.937   | 0.363   | 1.097  | -1.629 | -0.012 | 1.03E-01 | 18531 |
| 20         | Frontal_Sup_MediaL_R | -1.455  | -2.806   | -0.103  | 0.689  | -2.110 | -0.015 | 3.49E-02 | 18590 | -0.797       | -2.362   | 0.768   | 0.798  | -0.999 | -0.007 | 3.18E-01 | 18531 |
| 21         | Frontal_Med_Orb_L    | -0.686  | -1.379   | 0.008   | 0.354  | -1.938 | -0.014 | 5.26E-02 | 18590 | -0.183       | -0.986   | 0.619   | 0.409  | -0.447 | -0.003 | 6.55E-01 | 18531 |
| 22         | Frontal_Med_Orb_R    | -0.596  | -1.448   | 0.256   | 0.435  | -1.371 | -0.010 | 1.70E-01 | 18590 | -0.340       | -1.326   | 0.645   | 0.503  | -0.677 | -0.005 | 4.98E-01 | 18531 |

|    |                      |        |        |        |       |        |        |          |       |        |        |        |       |        |        |          |       |
|----|----------------------|--------|--------|--------|-------|--------|--------|----------|-------|--------|--------|--------|-------|--------|--------|----------|-------|
| 23 | Rectus_L             | -0.593 | -1.311 | 0.124  | 0.366 | -1.621 | -0.012 | 1.05E-01 | 18590 | 0.025  | -0.805 | 0.856  | 0.424 | 0.059  | 0.000  | 9.53E-01 | 18531 |
| 24 | Rectus_R             | -0.722 | -1.386 | -0.059 | 0.339 | -2.133 | -0.016 | 3.29E-02 | 18590 | -0.238 | -1.006 | 0.531  | 0.392 | -0.606 | -0.004 | 5.44E-01 | 18531 |
| 25 | OFCmed_L             | -0.389 | -0.805 | 0.027  | 0.212 | -1.832 | -0.013 | 6.69E-02 | 18590 | -0.154 | -0.635 | 0.328  | 0.246 | -0.625 | -0.005 | 5.32E-01 | 18531 |
| 26 | OFCmed_R             | -0.320 | -0.804 | 0.165  | 0.247 | -1.293 | -0.009 | 1.96E-01 | 18590 | -0.536 | -1.097 | 0.026  | 0.286 | -1.870 | -0.014 | 6.15E-02 | 18531 |
| 27 | OFCant_L             | -0.212 | -0.692 | 0.269  | 0.245 | -0.863 | -0.006 | 3.88E-01 | 18590 | -0.549 | -1.106 | 0.008  | 0.284 | -1.932 | -0.014 | 5.33E-02 | 18531 |
| 28 | OFCant_R             | 0.050  | -0.586 | 0.685  | 0.324 | 0.153  | 0.001  | 8.79E-01 | 18590 | -0.690 | -1.426 | 0.046  | 0.376 | -1.837 | -0.013 | 6.63E-02 | 18531 |
| 29 | OFCpost_L            | -0.120 | -0.722 | 0.482  | 0.307 | -0.390 | -0.003 | 6.97E-01 | 18590 | -0.578 | -1.276 | 0.119  | 0.356 | -1.625 | -0.012 | 1.04E-01 | 18531 |
| 30 | OFCpost_R            | -0.156 | -0.713 | 0.400  | 0.284 | -0.550 | -0.004 | 5.82E-01 | 18590 | -0.302 | -0.947 | 0.343  | 0.329 | -0.917 | -0.007 | 3.59E-01 | 18531 |
| 31 | OFClat_L             | -0.071 | -0.274 | 0.132  | 0.104 | -0.684 | -0.005 | 4.94E-01 | 18590 | -0.235 | -0.471 | 0.000  | 0.120 | -1.959 | -0.014 | 5.01E-02 | 18531 |
| 32 | OFClat_R             | -0.115 | -0.286 | 0.057  | 0.088 | -1.312 | -0.010 | 1.90E-01 | 18590 | -0.049 | -0.248 | 0.150  | 0.101 | -0.481 | -0.004 | 6.30E-01 | 18531 |
| 33 | Insula_L             | -0.317 | -2.180 | 1.546  | 0.950 | -0.334 | -0.002 | 7.39E-01 | 18590 | -0.965 | -3.121 | 1.191  | 1.100 | -0.878 | -0.006 | 3.80E-01 | 18531 |
| 34 | Insula_R             | -0.578 | -2.393 | 1.236  | 0.926 | -0.624 | -0.005 | 5.32E-01 | 18590 | -1.347 | -3.447 | 0.753  | 1.071 | -1.257 | -0.009 | 2.09E-01 | 18531 |
| 37 | Cingulate_Mid_L      | -1.268 | -2.841 | 0.305  | 0.803 | -1.580 | -0.012 | 1.14E-01 | 18590 | -1.063 | -2.884 | 0.758  | 0.929 | -1.144 | -0.008 | 2.53E-01 | 18531 |
| 38 | Cingulate_Mid_R      | -1.516 | -3.195 | 0.162  | 0.856 | -1.771 | -0.013 | 7.67E-02 | 18590 | -0.583 | -2.526 | 1.359  | 0.991 | -0.589 | -0.004 | 5.56E-01 | 18531 |
| 39 | Cingulate_Post_L     | -0.074 | -0.556 | 0.407  | 0.245 | -0.303 | -0.002 | 7.62E-01 | 18590 | -0.314 | -0.871 | 0.244  | 0.284 | -1.104 | -0.008 | 2.70E-01 | 18531 |
| 40 | Cingulate_Post_R     | -0.024 | -0.291 | 0.243  | 0.136 | -0.177 | -0.001 | 8.60E-01 | 18590 | -0.230 | -0.539 | 0.080  | 0.158 | -1.456 | -0.011 | 1.45E-01 | 18531 |
| 41 | Hippocampus_L        | 0.135  | -0.643 | 0.913  | 0.397 | 0.339  | 0.002  | 7.34E-01 | 18590 | 0.071  | -0.829 | 0.971  | 0.459 | 0.155  | 0.001  | 8.77E-01 | 18531 |
| 42 | Hippocampus_R        | 0.171  | -0.636 | 0.978  | 0.412 | 0.416  | 0.003  | 6.78E-01 | 18590 | 0.141  | -0.793 | 1.075  | 0.477 | 0.296  | 0.002  | 7.67E-01 | 18531 |
| 43 | ParaHippocampaL      | 0.413  | -0.278 | 1.104  | 0.353 | 1.172  | 0.009  | 2.41E-01 | 18590 | 0.030  | -0.769 | 0.829  | 0.408 | 0.074  | 0.001  | 9.41E-01 | 18531 |
| 44 | ParaHippocampaR      | 0.092  | -0.780 | 0.963  | 0.445 | 0.206  | 0.002  | 8.37E-01 | 18590 | 0.699  | -0.310 | 1.708  | 0.515 | 1.357  | 0.010  | 1.75E-01 | 18531 |
| 45 | Amygdala_L           | 0.217  | -0.052 | 0.485  | 0.137 | 1.581  | 0.012  | 1.14E-01 | 18590 | -0.097 | -0.407 | 0.214  | 0.158 | -0.611 | -0.004 | 5.41E-01 | 18531 |
| 46 | Amygdala_R           | 0.198  | -0.077 | 0.473  | 0.140 | 1.413  | 0.010  | 1.58E-01 | 18590 | -0.022 | -0.340 | 0.296  | 0.162 | -0.137 | -0.001 | 8.91E-01 | 18531 |
| 47 | Calcarine_L          | -0.175 | -2.739 | 2.389  | 1.308 | -0.134 | -0.001 | 8.93E-01 | 18590 | -0.054 | -3.021 | 2.913  | 1.514 | -0.036 | 0.000  | 9.72E-01 | 18531 |
| 48 | Calcarine_R          | -0.316 | -2.458 | 1.826  | 1.093 | -0.289 | -0.002 | 7.73E-01 | 18590 | 0.674  | -1.807 | 3.154  | 1.266 | 0.532  | 0.004  | 5.95E-01 | 18531 |
| 49 | Cuneus_L             | -0.544 | -2.151 | 1.063  | 0.820 | -0.663 | -0.005 | 5.07E-01 | 18590 | 1.546  | -0.317 | 3.408  | 0.950 | 1.627  | 0.012  | 1.04E-01 | 18531 |
| 50 | Cuneus_R             | -0.177 | -1.406 | 1.053  | 0.627 | -0.281 | -0.002 | 7.78E-01 | 18590 | -0.706 | -2.131 | 0.720  | 0.727 | -0.971 | -0.007 | 3.32E-01 | 18531 |
| 51 | Lingual_L            | -0.087 | -1.627 | 1.454  | 0.786 | -0.110 | -0.001 | 9.12E-01 | 18590 | 0.155  | -1.632 | 1.942  | 0.912 | 0.170  | 0.001  | 8.65E-01 | 18531 |
| 52 | Lingual_R            | -0.478 | -2.093 | 1.137  | 0.824 | -0.580 | -0.004 | 5.62E-01 | 18590 | 0.300  | -1.569 | 2.169  | 0.954 | 0.315  | 0.002  | 7.53E-01 | 18531 |
| 53 | Occipital_Sup_L      | 0.207  | -0.851 | 1.266  | 0.540 | 0.384  | 0.003  | 7.01E-01 | 18590 | 0.351  | -0.876 | 1.579  | 0.626 | 0.561  | 0.004  | 5.75E-01 | 18531 |
| 54 | Occipital_Sup_R      | 0.481  | -0.667 | 1.629  | 0.586 | 0.821  | 0.006  | 4.12E-01 | 18590 | -1.330 | -2.660 | 0.001  | 0.679 | -1.959 | -0.014 | 5.01E-02 | 18531 |
| 55 | Occipital_Mid_L      | -1.069 | -3.551 | 1.414  | 1.266 | -0.844 | -0.006 | 3.99E-01 | 18590 | -2.021 | -4.893 | 0.852  | 1.465 | -1.379 | -0.010 | 1.68E-01 | 18531 |
| 56 | Occipital_Mid_R      | -0.613 | -2.339 | 1.113  | 0.881 | -0.696 | -0.005 | 4.87E-01 | 18590 | -1.701 | -3.702 | 0.300  | 1.021 | -1.666 | -0.012 | 9.57E-02 | 18531 |
| 57 | Occipital_Inf_L      | -0.905 | -1.729 | -0.081 | 0.420 | -2.152 | -0.016 | 3.14E-02 | 18590 | -0.878 | -1.832 | 0.076  | 0.487 | -1.803 | -0.013 | 7.13E-02 | 18531 |
| 58 | Occipital_Inf_R      | -0.043 | -0.996 | 0.909  | 0.486 | -0.089 | -0.001 | 9.29E-01 | 18590 | -1.392 | -2.495 | -0.289 | 0.563 | -2.474 | -0.018 | 1.34E-02 | 18531 |
| 59 | Fusiform_L           | -0.545 | -2.349 | 1.258  | 0.920 | -0.592 | -0.004 | 5.54E-01 | 18590 | -0.289 | -2.377 | 1.799  | 1.065 | -0.271 | -0.002 | 7.86E-01 | 18531 |
| 60 | Fusiform_R           | -1.503 | -3.486 | 0.481  | 1.012 | -1.485 | -0.011 | 1.38E-01 | 18590 | 0.666  | -1.630 | 2.962  | 1.171 | 0.568  | 0.004  | 5.70E-01 | 18531 |
| 61 | Postcentral_L        | -1.257 | -3.970 | 1.457  | 1.384 | -0.908 | -0.007 | 3.64E-01 | 18590 | 1.608  | -1.534 | 4.750  | 1.603 | 1.003  | 0.007  | 3.16E-01 | 18531 |
| 62 | Postcentral_R        | -1.362 | -4.146 | 1.421  | 1.420 | -0.960 | -0.007 | 3.37E-01 | 18590 | 2.074  | -1.148 | 5.296  | 1.644 | 1.262  | 0.009  | 2.07E-01 | 18531 |
| 63 | Parietal_Sup_L       | -1.711 | -3.274 | -0.147 | 0.798 | -2.144 | -0.016 | 3.20E-02 | 18590 | -0.075 | -1.886 | 1.736  | 0.924 | -0.081 | -0.001 | 9.35E-01 | 18531 |
| 64 | Parietal_Sup_R       | -1.706 | -3.095 | -0.318 | 0.708 | -2.409 | -0.018 | 1.60E-02 | 18590 | 0.025  | -1.582 | 1.633  | 0.820 | 0.031  | 0.000  | 9.75E-01 | 18531 |
| 65 | Parietal_Inf_L       | -1.998 | -4.045 | 0.050  | 1.045 | -1.912 | -0.014 | 5.58E-02 | 18590 | 0.245  | -2.126 | 2.616  | 1.210 | 0.203  | 0.001  | 8.39E-01 | 18531 |
| 66 | Parietal_Inf_R       | -0.547 | -1.874 | 0.780  | 0.677 | -0.808 | -0.006 | 4.19E-01 | 18590 | -0.148 | -1.684 | 1.388  | 0.784 | -0.188 | -0.001 | 8.51E-01 | 18531 |
| 67 | SupraMarginal_L      | -0.736 | -1.936 | 0.463  | 0.612 | -1.203 | -0.009 | 2.29E-01 | 18590 | -0.077 | -1.467 | 1.313  | 0.709 | -0.108 | -0.001 | 9.14E-01 | 18531 |
| 68 | SupraMarginal_R      | -0.728 | -2.424 | 0.969  | 0.866 | -0.841 | -0.006 | 4.01E-01 | 18590 | 1.291  | -0.674 | 3.255  | 1.002 | 1.288  | 0.009  | 1.98E-01 | 18531 |
| 69 | Angular_L            | -1.504 | -2.683 | -0.325 | 0.601 | -2.501 | -0.018 | 1.24E-02 | 18590 | 0.407  | -0.958 | 1.773  | 0.697 | 0.585  | 0.004  | 5.59E-01 | 18531 |
| 70 | Angular_R            | -2.022 | -3.603 | -0.441 | 0.807 | -2.507 | -0.018 | 1.22E-02 | 18590 | -0.573 | -2.403 | 1.258  | 0.934 | -0.613 | -0.005 | 5.40E-01 | 18531 |
| 71 | Precuneus_L          | -2.962 | -5.835 | -0.089 | 1.466 | -2.021 | -0.015 | 4.33E-02 | 18590 | -0.435 | -3.760 | 2.891  | 1.696 | -0.256 | -0.002 | 7.98E-01 | 18531 |
| 72 | Precuneus_R          | -2.096 | -4.656 | 0.463  | 1.306 | -1.605 | -0.012 | 1.08E-01 | 18590 | -2.011 | -4.972 | 0.950  | 1.511 | -1.331 | -0.010 | 1.83E-01 | 18531 |
| 73 | Paracentral_Lobule_L | -0.922 | -2.237 | 0.393  | 0.671 | -1.374 | -0.010 | 1.69E-01 | 18590 | -0.395 | -1.918 | 1.129  | 0.777 | -0.508 | -0.004 | 6.12E-01 | 18531 |

|     |                      |        |        |       |       |        |        |          |       |        |        |       |       |        |        |          |       |
|-----|----------------------|--------|--------|-------|-------|--------|--------|----------|-------|--------|--------|-------|-------|--------|--------|----------|-------|
| 74  | Paracentral_Lobule_R | -0.803 | -1.745 | 0.139 | 0.481 | -1.670 | -0.012 | 9.49E-02 | 18590 | 0.040  | -1.051 | 1.132 | 0.557 | 0.072  | 0.001  | 9.42E-01 | 18531 |
| 75  | Caudate_L            | 1.132  | 0.081  | 2.183 | 0.536 | 2.110  | 0.015  | 3.48E-02 | 18590 | 0.890  | -0.327 | 2.107 | 0.621 | 1.433  | 0.011  | 1.52E-01 | 18531 |
| 76  | Caudate_R            | 0.688  | -0.502 | 1.877 | 0.607 | 1.133  | 0.008  | 2.57E-01 | 18590 | 0.785  | -0.593 | 2.162 | 0.703 | 1.116  | 0.008  | 2.64E-01 | 18531 |
| 77  | Putamen_L            | 0.343  | -1.252 | 1.938 | 0.814 | 0.421  | 0.003  | 6.73E-01 | 18590 | 0.302  | -1.546 | 2.150 | 0.943 | 0.321  | 0.002  | 7.49E-01 | 18531 |
| 78  | Putamen_R            | 0.055  | -1.570 | 1.680 | 0.829 | 0.067  | 0.000  | 9.47E-01 | 18590 | 0.467  | -1.415 | 2.350 | 0.961 | 0.487  | 0.004  | 6.27E-01 | 18531 |
| 79  | Pallidum_L           | -0.054 | -0.196 | 0.088 | 0.072 | -0.745 | -0.005 | 4.56E-01 | 18590 | -0.043 | -0.207 | 0.122 | 0.084 | -0.510 | -0.004 | 6.10E-01 | 18531 |
| 80  | Pallidum_R           | -0.017 | -0.173 | 0.138 | 0.079 | -0.217 | -0.002 | 8.29E-01 | 18590 | -0.051 | -0.231 | 0.130 | 0.092 | -0.552 | -0.004 | 5.81E-01 | 18531 |
| 83  | Heschl_L             | -0.137 | -0.424 | 0.151 | 0.147 | -0.931 | -0.007 | 3.52E-01 | 18590 | -0.018 | -0.351 | 0.315 | 0.170 | -0.105 | -0.001 | 9.16E-01 | 18531 |
| 84  | Heschl_R             | 0.171  | -0.150 | 0.492 | 0.164 | 1.041  | 0.008  | 2.98E-01 | 18590 | -0.099 | -0.471 | 0.273 | 0.190 | -0.521 | -0.004 | 6.02E-01 | 18531 |
| 85  | Temporal_Sup_L       | -0.036 | -2.113 | 2.040 | 1.059 | -0.034 | 0.000  | 9.73E-01 | 18590 | -0.755 | -3.161 | 1.652 | 1.228 | -0.615 | -0.005 | 5.39E-01 | 18531 |
| 86  | Temporal_Sup_R       | 0.454  | -1.844 | 2.752 | 1.172 | 0.387  | 0.003  | 6.99E-01 | 18590 | -2.368 | -5.028 | 0.291 | 1.357 | -1.746 | -0.013 | 8.09E-02 | 18531 |
| 87  | Temporal_Pole_Sup_L  | 0.019  | -0.966 | 1.003 | 0.502 | 0.037  | 0.000  | 9.70E-01 | 18590 | -0.744 | -1.881 | 0.394 | 0.580 | -1.281 | -0.009 | 2.00E-01 | 18531 |
| 88  | Temporal_Pole_Sup_R  | 0.837  | -0.199 | 1.873 | 0.529 | 1.583  | 0.012  | 1.13E-01 | 18590 | -1.132 | -2.330 | 0.066 | 0.611 | -1.852 | -0.014 | 6.41E-02 | 18531 |
| 89  | Temporal_Mid_L       | -1.568 | -5.030 | 1.894 | 1.766 | -0.888 | -0.007 | 3.75E-01 | 18590 | -2.979 | -6.984 | 1.027 | 2.044 | -1.458 | -0.011 | 1.45E-01 | 18531 |
| 90  | Temporal_Mid_R       | -2.793 | -5.866 | 0.280 | 1.568 | -1.782 | -0.013 | 7.48E-02 | 18590 | -1.673 | -5.228 | 1.882 | 1.814 | -0.923 | -0.007 | 3.56E-01 | 18531 |
| 91  | Temporal_Pole_Mid_L  | 0.180  | -0.646 | 1.006 | 0.422 | 0.427  | 0.003  | 6.69E-01 | 18590 | -0.195 | -1.151 | 0.762 | 0.488 | -0.399 | -0.003 | 6.90E-01 | 18531 |
| 92  | Temporal_Pole_Mid_R  | 0.224  | -0.779 | 1.228 | 0.512 | 0.438  | 0.003  | 6.61E-01 | 18590 | -0.695 | -1.858 | 0.467 | 0.593 | -1.172 | -0.009 | 2.41E-01 | 18531 |
| 93  | Temporal_Inf_L       | -1.976 | -4.356 | 0.403 | 1.214 | -1.628 | -0.012 | 1.03E-01 | 18590 | -1.093 | -3.847 | 1.661 | 1.405 | -0.778 | -0.006 | 4.37E-01 | 18531 |
| 94  | Temporal_Inf_R       | -2.483 | -5.077 | 0.111 | 1.324 | -1.876 | -0.014 | 6.06E-02 | 18590 | 0.276  | -2.727 | 3.280 | 1.532 | 0.180  | 0.001  | 8.57E-01 | 18531 |
| 95  | Cerebellum_Crus1_L   | -0.016 | -2.842 | 2.810 | 1.442 | -0.011 | 0.000  | 9.91E-01 | 18590 | 0.865  | -2.408 | 4.138 | 1.670 | 0.518  | 0.004  | 6.04E-01 | 18531 |
| 96  | Cerebellum_Crus1_R   | -0.237 | -3.118 | 2.643 | 1.470 | -0.161 | -0.001 | 8.72E-01 | 18590 | -0.168 | -3.507 | 3.172 | 1.704 | -0.099 | -0.001 | 9.21E-01 | 18531 |
| 97  | Cerebellum_Crus2_L   | 0.288  | -1.952 | 2.529 | 1.143 | 0.252  | 0.002  | 8.01E-01 | 18590 | 1.087  | -1.506 | 3.681 | 1.323 | 0.822  | 0.006  | 4.11E-01 | 18531 |
| 98  | Cerebellum_Crus2_R   | -0.412 | -2.484 | 1.660 | 1.057 | -0.390 | -0.003 | 6.97E-01 | 18590 | 0.248  | -2.152 | 2.648 | 1.224 | 0.202  | 0.001  | 8.40E-01 | 18531 |
| 99  | Cerebellum_3_L       | -0.051 | -0.201 | 0.099 | 0.077 | -0.665 | -0.005 | 5.06E-01 | 18590 | -0.009 | -0.183 | 0.165 | 0.089 | -0.101 | -0.001 | 9.20E-01 | 18531 |
| 100 | Cerebellum_3_R       | -0.004 | -0.207 | 0.199 | 0.104 | -0.042 | 0.000  | 9.67E-01 | 18590 | -0.016 | -0.251 | 0.220 | 0.120 | -0.130 | -0.001 | 8.97E-01 | 18531 |
| 101 | Cerebellum_4_5_L     | 0.092  | -1.124 | 1.309 | 0.621 | 0.149  | 0.001  | 8.82E-01 | 18590 | 0.431  | -0.978 | 1.841 | 0.719 | 0.600  | 0.004  | 5.49E-01 | 18531 |
| 102 | Cerebellum_4_5_R     | -0.461 | -1.452 | 0.530 | 0.506 | -0.912 | -0.007 | 3.62E-01 | 18590 | 0.782  | -0.367 | 1.931 | 0.586 | 1.334  | 0.010  | 1.82E-01 | 18531 |
| 103 | Cerebellum_6_L       | -0.340 | -2.441 | 1.762 | 1.072 | -0.317 | -0.002 | 7.51E-01 | 18590 | 1.019  | -1.415 | 3.453 | 1.242 | 0.821  | 0.006  | 4.12E-01 | 18531 |
| 104 | Cerebellum_6_R       | -0.698 | -2.912 | 1.515 | 1.129 | -0.618 | -0.005 | 5.36E-01 | 18590 | 0.819  | -1.748 | 3.386 | 1.310 | 0.625  | 0.005  | 5.32E-01 | 18531 |
| 105 | Cerebellum_7b_L      | -0.247 | -0.932 | 0.438 | 0.350 | -0.706 | -0.005 | 4.80E-01 | 18590 | 0.181  | -0.612 | 0.974 | 0.404 | 0.448  | 0.003  | 6.54E-01 | 18531 |
| 106 | Cerebellum_7b_R      | -0.040 | -0.719 | 0.639 | 0.346 | -0.115 | -0.001 | 9.09E-01 | 18590 | 0.191  | -0.595 | 0.977 | 0.401 | 0.476  | 0.003  | 6.34E-01 | 18531 |
| 107 | Cerebellum_8_L       | -1.283 | -3.458 | 0.891 | 1.109 | -1.157 | -0.008 | 2.47E-01 | 18590 | 0.676  | -1.841 | 3.194 | 1.284 | 0.527  | 0.004  | 5.98E-01 | 18531 |
| 108 | Cerebellum_8_R       | -1.788 | -4.617 | 1.042 | 1.444 | -1.238 | -0.009 | 2.16E-01 | 18590 | 0.045  | -3.233 | 3.323 | 1.673 | 0.027  | 0.000  | 9.79E-01 | 18531 |
| 109 | Cerebellum_9_L       | 0.561  | -0.669 | 1.791 | 0.627 | 0.894  | 0.007  | 3.71E-01 | 18590 | -0.165 | -1.589 | 1.259 | 0.727 | -0.227 | -0.002 | 8.21E-01 | 18531 |
| 110 | Cerebellum_9_R       | 0.522  | -0.686 | 1.731 | 0.617 | 0.847  | 0.006  | 3.97E-01 | 18590 | -0.741 | -2.142 | 0.660 | 0.715 | -1.037 | -0.008 | 3.00E-01 | 18531 |
| 111 | Cerebellum_10_L      | 0.033  | -0.055 | 0.120 | 0.045 | 0.731  | 0.005  | 4.65E-01 | 18590 | 0.077  | -0.024 | 0.178 | 0.052 | 1.497  | 0.011  | 1.35E-01 | 18531 |
| 112 | Cerebellum_10_R      | -0.045 | -0.136 | 0.046 | 0.046 | -0.974 | -0.007 | 3.30E-01 | 18590 | 0.062  | -0.043 | 0.167 | 0.054 | 1.150  | 0.008  | 2.50E-01 | 18531 |
| 113 | Vermis_1_2           | -0.029 | -0.085 | 0.028 | 0.029 | -0.992 | -0.007 | 3.21E-01 | 18590 | -0.027 | -0.093 | 0.039 | 0.034 | -0.799 | -0.006 | 4.24E-01 | 18531 |
| 114 | Vermis_3             | -0.150 | -0.375 | 0.075 | 0.115 | -1.306 | -0.010 | 1.92E-01 | 18590 | -0.045 | -0.306 | 0.217 | 0.133 | -0.336 | -0.002 | 7.37E-01 | 18531 |
| 115 | Vermis_4_5           | -0.308 | -0.970 | 0.354 | 0.338 | -0.911 | -0.007 | 3.62E-01 | 18590 | 0.200  | -0.569 | 0.969 | 0.392 | 0.510  | 0.004  | 6.10E-01 | 18531 |
| 116 | Vermis_6             | -0.133 | -0.502 | 0.235 | 0.188 | -0.709 | -0.005 | 4.78E-01 | 18590 | 0.140  | -0.288 | 0.568 | 0.218 | 0.641  | 0.005  | 5.22E-01 | 18531 |
| 117 | Vermis_7             | -0.002 | -0.211 | 0.206 | 0.106 | -0.020 | 0.000  | 9.84E-01 | 18590 | 0.093  | -0.149 | 0.335 | 0.123 | 0.755  | 0.006  | 4.50E-01 | 18531 |
| 118 | Vermis_8             | -0.077 | -0.420 | 0.266 | 0.175 | -0.439 | -0.003 | 6.61E-01 | 18590 | 0.041  | -0.357 | 0.438 | 0.203 | 0.200  | 0.001  | 8.41E-01 | 18531 |
| 119 | Vermis_9             | 0.200  | -0.078 | 0.478 | 0.142 | 1.410  | 0.010  | 1.59E-01 | 18590 | -0.050 | -0.372 | 0.272 | 0.164 | -0.304 | -0.002 | 7.61E-01 | 18531 |
| 120 | Vermis_10            | 0.026  | -0.051 | 0.104 | 0.040 | 0.662  | 0.005  | 5.08E-01 | 18590 | -0.045 | -0.135 | 0.045 | 0.046 | -0.982 | -0.007 | 3.26E-01 | 18531 |
| 121 | Thal_AV_L            | 0.010  | -0.021 | 0.041 | 0.016 | 0.623  | 0.005  | 5.33E-01 | 18590 | 0.011  | -0.025 | 0.047 | 0.018 | 0.618  | 0.005  | 5.37E-01 | 18531 |
| 122 | Thal_AV_R            | 0.009  | -0.035 | 0.053 | 0.023 | 0.403  | 0.003  | 6.87E-01 | 18590 | 0.021  | -0.031 | 0.072 | 0.026 | 0.795  | 0.006  | 4.27E-01 | 18531 |
| 123 | Thal_LP_L            | -0.006 | -0.040 | 0.029 | 0.018 | -0.330 | -0.002 | 7.42E-01 | 18590 | 0.016  | -0.024 | 0.056 | 0.020 | 0.793  | 0.006  | 4.28E-01 | 18531 |
| 124 | Thal_LP_R            | 0.029  | -0.016 | 0.074 | 0.023 | 1.262  | 0.009  | 2.07E-01 | 18590 | 0.022  | -0.030 | 0.074 | 0.026 | 0.817  | 0.006  | 4.14E-01 | 18531 |



|     |           |        |        |        |       |        |        |          |       |        |        |       |       |        |        |          |       |
|-----|-----------|--------|--------|--------|-------|--------|--------|----------|-------|--------|--------|-------|-------|--------|--------|----------|-------|
| 125 | Tha_VA_L  | 0.004  | -0.032 | 0.041  | 0.019 | 0.231  | 0.002  | 8.17E-01 | 18590 | 0.024  | -0.019 | 0.066 | 0.022 | 1.085  | 0.008  | 2.78E-01 | 18531 |
| 126 | Tha_VA_R  | -0.014 | -0.059 | 0.031  | 0.023 | -0.600 | -0.004 | 5.48E-01 | 18590 | 0.010  | -0.043 | 0.062 | 0.027 | 0.362  | 0.003  | 7.17E-01 | 18531 |
| 127 | Tha_VL_L  | 0.023  | -0.081 | 0.127  | 0.053 | 0.431  | 0.003  | 6.66E-01 | 18590 | -0.049 | -0.170 | 0.072 | 0.062 | -0.798 | -0.006 | 4.25E-01 | 18531 |
| 128 | Tha_VL_R  | 0.027  | -0.112 | 0.165  | 0.071 | 0.379  | 0.003  | 7.05E-01 | 18590 | -0.039 | -0.200 | 0.122 | 0.082 | -0.477 | -0.004 | 6.33E-01 | 18531 |
| 129 | Tha_VPL_L | 0.037  | -0.087 | 0.161  | 0.063 | 0.587  | 0.004  | 5.57E-01 | 18590 | -0.062 | -0.206 | 0.081 | 0.073 | -0.851 | -0.006 | 3.95E-01 | 18531 |
| 130 | Tha_VPL_R | 0.076  | -0.055 | 0.207  | 0.067 | 1.139  | 0.008  | 2.55E-01 | 18590 | 0.022  | -0.130 | 0.173 | 0.077 | 0.282  | 0.002  | 7.78E-01 | 18531 |
| 131 | Tha_IL_L  | 0.029  | -0.025 | 0.083  | 0.027 | 1.050  | 0.008  | 2.94E-01 | 18590 | -0.008 | -0.070 | 0.055 | 0.032 | -0.244 | -0.002 | 8.07E-01 | 18531 |
| 132 | Tha_IL_R  | 0.037  | -0.024 | 0.098  | 0.031 | 1.177  | 0.009  | 2.39E-01 | 18590 | 0.007  | -0.064 | 0.077 | 0.036 | 0.191  | 0.001  | 8.48E-01 | 18531 |
| 133 | Tha_Re_L  | 0.000  | 0.000  | 0.000  | 0.000 | -0.801 | -0.006 | 4.23E-01 | 18590 | 0.000  | 0.000  | 0.000 | 0.000 | 1.464  | 0.011  | 1.43E-01 | 18531 |
| 134 | Tha_Re_R  | -0.001 | -0.003 | 0.001  | 0.001 | -0.801 | -0.006 | 4.23E-01 | 18590 | 0.000  | -0.002 | 0.003 | 0.001 | 0.384  | 0.003  | 7.01E-01 | 18531 |
| 135 | Tha_MDm_L | 0.200  | -0.198 | 0.598  | 0.203 | 0.985  | 0.007  | 3.25E-01 | 18590 | -0.046 | -0.507 | 0.415 | 0.235 | -0.195 | -0.001 | 8.45E-01 | 18531 |
| 136 | Tha_MDm_R | 0.290  | -0.173 | 0.753  | 0.236 | 1.228  | 0.009  | 2.19E-01 | 18590 | -0.025 | -0.561 | 0.511 | 0.273 | -0.091 | -0.001 | 9.27E-01 | 18531 |
| 137 | Tha_MDL_L | 0.032  | -0.037 | 0.101  | 0.035 | 0.916  | 0.007  | 3.60E-01 | 18590 | -0.005 | -0.085 | 0.075 | 0.041 | -0.120 | -0.001 | 9.05E-01 | 18531 |
| 138 | Tha_MDL_R | 0.041  | -0.038 | 0.119  | 0.040 | 1.019  | 0.007  | 3.08E-01 | 18590 | -0.007 | -0.098 | 0.084 | 0.046 | -0.148 | -0.001 | 8.82E-01 | 18531 |
| 139 | Tha_LGN_L | -0.013 | -0.023 | -0.002 | 0.005 | -2.348 | -0.017 | 1.89E-02 | 18590 | -0.004 | -0.016 | 0.008 | 0.006 | -0.644 | -0.005 | 5.19E-01 | 18531 |
| 140 | Tha_LGN_R | -0.017 | -0.039 | 0.005  | 0.011 | -1.494 | -0.011 | 1.35E-01 | 18590 | -0.015 | -0.041 | 0.011 | 0.013 | -1.131 | -0.008 | 2.58E-01 | 18531 |
| 141 | Tha_MGN_L | -0.007 | -0.025 | 0.012  | 0.010 | -0.683 | -0.005 | 4.95E-01 | 18590 | -0.012 | -0.034 | 0.010 | 0.011 | -1.081 | -0.008 | 2.80E-01 | 18531 |
| 142 | Tha_MGN_R | -0.001 | -0.021 | 0.020  | 0.010 | -0.051 | 0.000  | 9.59E-01 | 18590 | -0.013 | -0.037 | 0.010 | 0.012 | -1.092 | -0.008 | 2.75E-01 | 18531 |
| 143 | Tha_PuA_L | -0.007 | -0.029 | 0.015  | 0.011 | -0.647 | -0.005 | 5.18E-01 | 18590 | -0.013 | -0.039 | 0.012 | 0.013 | -1.014 | -0.007 | 3.11E-01 | 18531 |
| 144 | Tha_PuA_R | 0.011  | -0.035 | 0.057  | 0.023 | 0.456  | 0.003  | 6.48E-01 | 18590 | -0.027 | -0.080 | 0.026 | 0.027 | -0.987 | -0.007 | 3.24E-01 | 18531 |
| 145 | Tha_PuM_L | 0.064  | -0.374 | 0.503  | 0.224 | 0.287  | 0.002  | 7.74E-01 | 18590 | -0.178 | -0.685 | 0.330 | 0.259 | -0.686 | -0.005 | 4.93E-01 | 18531 |
| 146 | Tha_PuM_R | 0.298  | -0.248 | 0.845  | 0.279 | 1.070  | 0.008  | 2.85E-01 | 18590 | -0.071 | -0.704 | 0.561 | 0.323 | -0.221 | -0.002 | 8.25E-01 | 18531 |
| 147 | Tha_PuL_L | 0.024  | -0.056 | 0.104  | 0.041 | 0.582  | 0.004  | 5.61E-01 | 18590 | -0.013 | -0.106 | 0.079 | 0.047 | -0.281 | -0.002 | 7.79E-01 | 18531 |
| 148 | Tha_PuL_R | 0.076  | -0.051 | 0.204  | 0.065 | 1.177  | 0.009  | 2.39E-01 | 18590 | 0.015  | -0.132 | 0.163 | 0.075 | 0.204  | 0.001  | 8.39E-01 | 18531 |
| 149 | Tha_PuL_L | -0.006 | -0.027 | 0.016  | 0.011 | -0.503 | -0.004 | 6.15E-01 | 18590 | -0.001 | -0.026 | 0.024 | 0.013 | -0.082 | -0.001 | 9.35E-01 | 18531 |
| 150 | Tha_PuL_R | 0.002  | -0.026 | 0.031  | 0.015 | 0.165  | 0.001  | 8.69E-01 | 18590 | 0.016  | -0.017 | 0.050 | 0.017 | 0.955  | 0.007  | 3.40E-01 | 18531 |
| 151 | ACC_sub_L | -0.019 | -0.270 | 0.232  | 0.128 | -0.150 | -0.001 | 8.81E-01 | 18590 | -0.227 | -0.517 | 0.064 | 0.148 | -1.529 | -0.011 | 1.26E-01 | 18531 |
| 152 | ACC_sub_R | -0.010 | -0.245 | 0.224  | 0.120 | -0.085 | -0.001 | 9.32E-01 | 18590 | -0.257 | -0.528 | 0.014 | 0.138 | -1.856 | -0.014 | 6.35E-02 | 18531 |
| 153 | ACC_pre_L | -0.401 | -1.044 | 0.242  | 0.328 | -1.223 | -0.009 | 2.21E-01 | 18590 | -0.722 | -1.466 | 0.022 | 0.380 | -1.902 | -0.014 | 5.72E-02 | 18531 |
| 154 | ACC_pre_R | -0.393 | -1.012 | 0.226  | 0.316 | -1.244 | -0.009 | 2.14E-01 | 18590 | -0.418 | -1.135 | 0.299 | 0.366 | -1.144 | -0.008 | 2.53E-01 | 18531 |
| 155 | ACC_sup_L | 0.074  | -0.625 | 0.773  | 0.357 | 0.208  | 0.002  | 8.35E-01 | 18590 | -0.465 | -1.275 | 0.344 | 0.413 | -1.127 | -0.008 | 2.60E-01 | 18531 |
| 156 | ACC_sup_R | 0.183  | -0.541 | 0.907  | 0.369 | 0.496  | 0.004  | 6.20E-01 | 18590 | -0.500 | -1.338 | 0.338 | 0.428 | -1.170 | -0.009 | 2.42E-01 | 18531 |
| 157 | N_Acc_L   | 0.021  | -0.189 | 0.232  | 0.107 | 0.199  | 0.001  | 8.42E-01 | 18590 | 0.117  | -0.126 | 0.361 | 0.124 | 0.944  | 0.007  | 3.45E-01 | 18531 |
| 158 | N_Acc_R   | -0.054 | -0.236 | 0.128  | 0.093 | -0.581 | -0.004 | 5.62E-01 | 18590 | 0.035  | -0.176 | 0.246 | 0.108 | 0.323  | 0.002  | 7.47E-01 | 18531 |
| 159 | VTA_L     | 0.005  | -0.003 | 0.012  | 0.004 | 1.275  | 0.009  | 2.02E-01 | 18590 | -0.004 | -0.013 | 0.004 | 0.004 | -0.971 | -0.007 | 3.31E-01 | 18531 |
| 160 | VTA_R     | 0.006  | 0.000  | 0.013  | 0.003 | 1.884  | 0.014  | 5.96E-02 | 18590 | -0.003 | -0.011 | 0.005 | 0.004 | -0.713 | -0.005 | 4.76E-01 | 18531 |
| 161 | SN_pc_L   | 0.010  | -0.002 | 0.022  | 0.006 | 1.606  | 0.012  | 1.08E-01 | 18590 | -0.010 | -0.024 | 0.003 | 0.007 | -1.483 | -0.011 | 1.38E-01 | 18531 |
| 162 | SN_pc_R   | 0.012  | -0.004 | 0.027  | 0.008 | 1.464  | 0.011  | 1.43E-01 | 18590 | -0.008 | -0.026 | 0.010 | 0.009 | -0.916 | -0.007 | 3.59E-01 | 18531 |
| 163 | SN_pr_L   | 0.005  | -0.012 | 0.021  | 0.008 | 0.556  | 0.004  | 5.78E-01 | 18590 | -0.014 | -0.032 | 0.005 | 0.010 | -1.448 | -0.011 | 1.48E-01 | 18531 |
| 164 | SN_pr_R   | 0.004  | -0.014 | 0.022  | 0.009 | 0.411  | 0.003  | 6.81E-01 | 18590 | -0.016 | -0.037 | 0.005 | 0.011 | -1.492 | -0.011 | 1.36E-01 | 18531 |
| 165 | Red_N_L   | 0.000  | -0.020 | 0.020  | 0.010 | 0.031  | 0.000  | 9.75E-01 | 18590 | -0.018 | -0.041 | 0.005 | 0.012 | -1.558 | -0.011 | 1.19E-01 | 18531 |
| 166 | Red_N_R   | -0.003 | -0.024 | 0.019  | 0.011 | -0.241 | -0.002 | 8.09E-01 | 18590 | -0.007 | -0.032 | 0.018 | 0.013 | -0.541 | -0.004 | 5.89E-01 | 18531 |
| 167 | LC_L      | 0.001  | -0.007 | 0.008  | 0.004 | 0.209  | 0.002  | 8.34E-01 | 18590 | -0.007 | -0.016 | 0.002 | 0.004 | -1.609 | -0.012 | 1.08E-01 | 18531 |
| 168 | LC_R      | 0.002  | -0.007 | 0.010  | 0.004 | 0.368  | 0.003  | 7.13E-01 | 18590 | -0.008 | -0.017 | 0.001 | 0.005 | -1.693 | -0.012 | 9.04E-02 | 18531 |
| 169 | Raphe_D   | -0.003 | -0.031 | 0.026  | 0.015 | -0.176 | -0.001 | 8.61E-01 | 18590 | -0.017 | -0.050 | 0.016 | 0.017 | -0.994 | -0.007 | 3.20E-01 | 18531 |
| 170 | Raphe_M   | -0.002 | -0.011 | 0.006  | 0.004 | -0.544 | -0.004 | 5.87E-01 | 18590 | -0.006 | -0.016 | 0.005 | 0.005 | -1.086 | -0.008 | 2.77E-01 | 18531 |

**Cooked vegetable intake**

**Processed meat intake**

| Number | AAL 3 region | beta     | 95%CI l  | 95%CI h | se     | t      | r      | p        | df.e  | beta    | 95%CI l  | 95%CI h | se     | t      | r      | p        | df.e  |
|--------|--------------|----------|----------|---------|--------|--------|--------|----------|-------|---------|----------|---------|--------|--------|--------|----------|-------|
| 0      | Total brain  | -122.865 | -235.993 | -9.737  | 57.716 | -2.129 | -0.016 | 3.33E-02 | 18391 | -59.112 | -216.010 | 97.786  | 80.046 | -0.738 | -0.005 | 4.60E-01 | 18724 |

|    |                      |        |        |        |       |        |        |          |       |        |        |        |       |        |        |          |       |
|----|----------------------|--------|--------|--------|-------|--------|--------|----------|-------|--------|--------|--------|-------|--------|--------|----------|-------|
| 1  | Precentral_L         | -2.191 | -6.173 | 1.790  | 2.031 | -1.079 | -0.008 | 2.81E-01 | 18391 | 0.714  | -4.815 | 6.243  | 2.821 | 0.253  | 0.002  | 8.00E-01 | 18724 |
| 2  | Precentral_R         | -0.792 | -4.437 | 2.852  | 1.859 | -0.426 | -0.003 | 6.70E-01 | 18391 | -0.571 | -5.638 | 4.497  | 2.585 | -0.221 | -0.002 | 8.25E-01 | 18724 |
| 3  | Frontal_Sup_2_L      | -4.682 | -8.887 | -0.478 | 2.145 | -2.183 | -0.016 | 2.91E-02 | 18391 | 2.874  | -2.961 | 8.710  | 2.977 | 0.965  | 0.007  | 3.34E-01 | 18724 |
| 4  | Frontal_Sup_2_R      | -3.170 | -7.805 | 1.465  | 2.365 | -1.340 | -0.010 | 1.80E-01 | 18391 | 1.705  | -4.724 | 8.135  | 3.280 | 0.520  | 0.004  | 6.03E-01 | 18724 |
| 5  | Frontal_Mid_2_L      | -1.044 | -5.459 | 3.370  | 2.252 | -0.464 | -0.003 | 6.43E-01 | 18391 | 5.394  | -0.737 | 11.524 | 3.128 | 1.724  | 0.013  | 8.46E-02 | 18724 |
| 6  | Frontal_Mid_2_R      | -1.555 | -6.545 | 3.435  | 2.546 | -0.611 | -0.005 | 5.41E-01 | 18391 | 2.646  | -4.290 | 9.581  | 3.538 | 0.748  | 0.005  | 4.55E-01 | 18724 |
| 7  | Frontal_Inf_Oper_L   | -0.349 | -1.652 | 0.954  | 0.665 | -0.525 | -0.004 | 5.99E-01 | 18391 | 0.754  | -1.057 | 2.565  | 0.924 | 0.816  | 0.006  | 4.14E-01 | 18724 |
| 8  | Frontal_Inf_Oper_R   | -0.829 | -2.464 | 0.807  | 0.834 | -0.993 | -0.007 | 3.21E-01 | 18391 | 1.756  | -0.514 | 4.027  | 1.158 | 1.516  | 0.011  | 1.29E-01 | 18724 |
| 9  | Frontal_Inf_Tri_L    | -1.795 | -4.562 | 0.972  | 1.412 | -1.272 | -0.009 | 2.03E-01 | 18391 | 2.561  | -1.284 | 6.406  | 1.962 | 1.305  | 0.010  | 1.92E-01 | 18724 |
| 10 | Frontal_Inf_Tri_R    | -0.577 | -2.750 | 1.597  | 1.109 | -0.520 | -0.004 | 6.03E-01 | 18391 | 1.145  | -1.875 | 4.165  | 1.541 | 0.743  | 0.005  | 4.57E-01 | 18724 |
| 11 | Frontal_Inf_Orb_2_L  | -1.154 | -1.983 | -0.326 | 0.423 | -2.732 | -0.020 | 6.31E-03 | 18391 | 1.287  | 0.137  | 2.437  | 0.587 | 2.194  | 0.016  | 2.82E-02 | 18724 |
| 12 | Frontal_Inf_Orb_2_R  | -1.106 | -1.971 | -0.240 | 0.442 | -2.503 | -0.018 | 1.23E-02 | 18391 | 0.559  | -0.644 | 1.761  | 0.614 | 0.910  | 0.007  | 3.63E-01 | 18724 |
| 13 | Rolandic_Oper_L      | -1.682 | -2.935 | -0.430 | 0.639 | -2.632 | -0.019 | 8.49E-03 | 18391 | 0.625  | -1.114 | 2.364  | 0.887 | 0.705  | 0.005  | 4.81E-01 | 18724 |
| 14 | Rolandic_Oper_R      | -3.284 | -5.076 | -1.492 | 0.914 | -3.593 | -0.026 | 3.28E-04 | 18391 | 1.013  | -1.476 | 3.502  | 1.270 | 0.798  | 0.006  | 4.25E-01 | 18724 |
| 15 | Supp_Motor_Area_L    | -1.899 | -4.874 | 1.076  | 1.518 | -1.251 | -0.009 | 2.11E-01 | 18391 | 0.526  | -3.609 | 4.661  | 2.110 | 0.249  | 0.002  | 8.03E-01 | 18724 |
| 16 | Supp_Motor_Area_R    | -2.111 | -5.400 | 1.177  | 1.678 | -1.258 | -0.009 | 2.08E-01 | 18391 | -0.050 | -4.619 | 4.519  | 2.331 | -0.021 | 0.000  | 9.83E-01 | 18724 |
| 17 | Olfactory_L          | -0.401 | -0.845 | 0.042  | 0.226 | -1.775 | -0.013 | 7.59E-02 | 18391 | 0.438  | -0.176 | 1.052  | 0.313 | 1.399  | 0.010  | 1.62E-01 | 18724 |
| 18 | Olfactory_R          | -0.328 | -0.773 | 0.116  | 0.227 | -1.448 | -0.011 | 1.48E-01 | 18391 | 0.442  | -0.174 | 1.058  | 0.314 | 1.405  | 0.010  | 1.60E-01 | 18724 |
| 19 | Frontal_Sup_Medial_L | -2.608 | -5.398 | 0.183  | 1.424 | -1.832 | -0.014 | 6.70E-02 | 18391 | 1.401  | -2.471 | 5.273  | 1.975 | 0.709  | 0.005  | 4.78E-01 | 18724 |
| 20 | Frontal_Sup_Medial_R | -2.111 | -4.144 | -0.078 | 1.037 | -2.035 | -0.015 | 4.18E-02 | 18391 | 1.169  | -1.650 | 3.988  | 1.438 | 0.813  | 0.006  | 4.16E-01 | 18724 |
| 21 | Frontal_Med_Orb_L    | -1.074 | -2.117 | -0.031 | 0.532 | -2.019 | -0.015 | 4.35E-02 | 18391 | 1.195  | -0.252 | 2.642  | 0.738 | 1.618  | 0.012  | 1.06E-01 | 18724 |
| 22 | Frontal_Med_Orb_R    | -1.027 | -2.309 | 0.255  | 0.654 | -1.570 | -0.012 | 1.16E-01 | 18391 | 1.451  | -0.328 | 3.229  | 0.907 | 1.599  | 0.012  | 1.10E-01 | 18724 |
| 23 | Rectus_L             | -1.187 | -2.266 | -0.108 | 0.551 | -2.156 | -0.016 | 3.11E-02 | 18391 | 0.477  | -1.020 | 1.974  | 0.764 | 0.624  | 0.005  | 5.32E-01 | 18724 |
| 24 | Rectus_R             | -0.863 | -1.861 | 0.135  | 0.509 | -1.695 | -0.012 | 9.01E-02 | 18391 | 0.717  | -0.668 | 2.103  | 0.707 | 1.015  | 0.007  | 3.10E-01 | 18724 |
| 25 | OFCmed_L             | -1.170 | -1.795 | -0.544 | 0.319 | -3.663 | -0.027 | 2.50E-04 | 18391 | 0.096  | -0.772 | 0.964  | 0.443 | 0.217  | 0.002  | 8.28E-01 | 18724 |
| 26 | OFCmed_R             | -0.547 | -1.276 | 0.181  | 0.372 | -1.472 | -0.011 | 1.41E-01 | 18391 | 0.758  | -0.253 | 1.770  | 0.516 | 1.469  | 0.011  | 1.42E-01 | 18724 |
| 27 | OFCant_L             | -1.011 | -1.734 | -0.287 | 0.369 | -2.736 | -0.020 | 6.22E-03 | 18391 | 0.290  | -0.715 | 1.294  | 0.512 | 0.566  | 0.004  | 5.72E-01 | 18724 |
| 28 | OFCant_R             | -0.749 | -1.705 | 0.208  | 0.488 | -1.534 | -0.011 | 1.25E-01 | 18391 | 0.704  | -0.622 | 2.031  | 0.677 | 1.041  | 0.008  | 2.98E-01 | 18724 |
| 29 | OFCpost_L            | -1.504 | -2.410 | -0.597 | 0.462 | -3.252 | -0.024 | 1.15E-03 | 18391 | 0.842  | -0.416 | 2.100  | 0.642 | 1.312  | 0.010  | 1.90E-01 | 18724 |
| 30 | OFCpost_R            | -1.423 | -2.261 | -0.585 | 0.427 | -3.329 | -0.025 | 8.74E-04 | 18391 | 0.362  | -0.800 | 1.525  | 0.593 | 0.611  | 0.004  | 5.41E-01 | 18724 |
| 31 | OFClat_L             | -0.350 | -0.656 | -0.045 | 0.156 | -2.246 | -0.017 | 2.47E-02 | 18391 | 0.106  | -0.318 | 0.531  | 0.216 | 0.492  | 0.004  | 6.23E-01 | 18724 |
| 32 | OFClat_R             | -0.469 | -0.728 | -0.211 | 0.132 | -3.562 | -0.026 | 3.69E-04 | 18391 | 0.076  | -0.282 | 0.434  | 0.183 | 0.416  | 0.003  | 6.77E-01 | 18724 |
| 33 | Insula_L             | -2.600 | -5.401 | 0.202  | 1.429 | -1.819 | -0.013 | 6.89E-02 | 18391 | 1.430  | -2.458 | 5.318  | 1.984 | 0.721  | 0.005  | 4.71E-01 | 18724 |
| 34 | Insula_R             | -3.187 | -5.917 | -0.458 | 1.392 | -2.289 | -0.017 | 2.21E-02 | 18391 | 1.405  | -2.383 | 5.193  | 1.933 | 0.727  | 0.005  | 4.67E-01 | 18724 |
| 37 | Cingulate_Mid_L      | -2.248 | -4.615 | 0.118  | 1.207 | -1.862 | -0.014 | 6.26E-02 | 18391 | -2.356 | -5.639 | 0.928  | 1.675 | -1.406 | -0.010 | 1.60E-01 | 18724 |
| 38 | Cingulate_Mid_R      | -1.621 | -4.144 | 0.902  | 1.287 | -1.259 | -0.009 | 2.08E-01 | 18391 | -0.979 | -4.480 | 2.521  | 1.786 | -0.548 | -0.004 | 5.84E-01 | 18724 |
| 39 | Cingulate_Post_L     | -0.713 | -1.436 | 0.010  | 0.369 | -1.932 | -0.014 | 5.34E-02 | 18391 | -1.403 | -2.407 | -0.398 | 0.512 | -2.737 | -0.020 | 6.20E-03 | 18724 |
| 40 | Cingulate_Post_R     | -0.420 | -0.821 | -0.018 | 0.205 | -2.050 | -0.015 | 4.04E-02 | 18391 | -0.557 | -1.115 | 0.000  | 0.284 | -1.961 | -0.014 | 4.99E-02 | 18724 |
| 41 | Hippocampus_L        | -0.628 | -1.797 | 0.541  | 0.596 | -1.053 | -0.008 | 2.92E-01 | 18391 | 0.615  | -1.010 | 2.240  | 0.829 | 0.742  | 0.005  | 4.58E-01 | 18724 |
| 42 | Hippocampus_R        | -0.568 | -1.781 | 0.645  | 0.619 | -0.918 | -0.007 | 3.59E-01 | 18391 | 1.103  | -0.582 | 2.788  | 0.860 | 1.283  | 0.009  | 1.99E-01 | 18724 |
| 43 | ParaHippocampaL      | -0.840 | -1.879 | 0.199  | 0.530 | -1.585 | -0.012 | 1.13E-01 | 18391 | -0.816 | -2.259 | 0.628  | 0.737 | -1.107 | -0.008 | 2.68E-01 | 18724 |
| 44 | ParaHippocampaR      | -0.228 | -1.539 | 1.084  | 0.669 | -0.340 | -0.003 | 7.34E-01 | 18391 | -1.039 | -2.860 | 0.783  | 0.929 | -1.117 | -0.008 | 2.64E-01 | 18724 |
| 45 | Amygdala_L           | -0.373 | -0.777 | 0.031  | 0.206 | -1.811 | -0.013 | 7.02E-02 | 18391 | 0.366  | -0.195 | 0.927  | 0.286 | 1.277  | 0.009  | 2.01E-01 | 18724 |
| 46 | Amygdala_R           | -0.261 | -0.674 | 0.152  | 0.211 | -1.240 | -0.009 | 2.15E-01 | 18391 | 0.233  | -0.341 | 0.807  | 0.293 | 0.796  | 0.006  | 4.26E-01 | 18724 |
| 47 | Calcarine_L          | -0.486 | -4.341 | 3.369  | 1.967 | -0.247 | -0.002 | 8.05E-01 | 18391 | -3.325 | -8.680 | 2.029  | 2.732 | -1.217 | -0.009 | 2.23E-01 | 18724 |
| 48 | Calcarine_R          | -0.357 | -3.580 | 2.865  | 1.644 | -0.217 | -0.002 | 8.28E-01 | 18391 | -1.432 | -5.906 | 3.042  | 2.283 | -0.627 | -0.005 | 5.31E-01 | 18724 |
| 49 | Cuneus_L             | -0.817 | -3.235 | 1.601  | 1.233 | -0.662 | -0.005 | 5.08E-01 | 18391 | -3.562 | -6.920 | -0.204 | 1.713 | -2.079 | -0.015 | 3.76E-02 | 18724 |
| 50 | Cuneus_R             | -0.284 | -2.135 | 1.566  | 0.944 | -0.301 | -0.002 | 7.63E-01 | 18391 | -1.931 | -4.500 | 0.638  | 1.311 | -1.473 | -0.011 | 1.41E-01 | 18724 |
| 51 | Lingual_L            | -1.150 | -3.469 | 1.169  | 1.183 | -0.972 | -0.007 | 3.31E-01 | 18391 | -1.496 | -4.714 | 1.722  | 1.642 | -0.911 | -0.007 | 3.62E-01 | 18724 |

|     |                      |        |         |        |       |        |        |          |       |         |         |        |       |        |        |          |       |
|-----|----------------------|--------|---------|--------|-------|--------|--------|----------|-------|---------|---------|--------|-------|--------|--------|----------|-------|
| 52  | Lingual_R            | -1.752 | -4.185  | 0.680  | 1.241 | -1.412 | -0.010 | 1.58E-01 | 18391 | -2.135  | -5.509  | 1.238  | 1.721 | -1.241 | -0.009 | 2.15E-01 | 18724 |
| 53  | Occipital_Sup_L      | -0.885 | -2.481  | 0.710  | 0.814 | -1.088 | -0.008 | 2.77E-01 | 18391 | -3.326  | -5.537  | -1.114 | 1.128 | -2.948 | -0.022 | 3.20E-03 | 18724 |
| 54  | Occipital_Sup_R      | -1.372 | -3.101  | 0.358  | 0.882 | -1.555 | -0.011 | 1.20E-01 | 18391 | -1.129  | -3.527  | 1.270  | 1.224 | -0.922 | -0.007 | 3.56E-01 | 18724 |
| 55  | Occipital_Mid_L      | -1.303 | -5.036  | 2.431  | 1.905 | -0.684 | -0.005 | 4.94E-01 | 18391 | -1.931  | -7.119  | 3.256  | 2.647 | -0.730 | -0.005 | 4.66E-01 | 18724 |
| 56  | Occipital_Mid_R      | -0.962 | -3.560  | 1.636  | 1.325 | -0.726 | -0.005 | 4.68E-01 | 18391 | -0.495  | -4.105  | 3.116  | 1.842 | -0.269 | -0.002 | 7.88E-01 | 18724 |
| 57  | Occipital_Inf_L      | -1.132 | -2.372  | 0.109  | 0.633 | -1.788 | -0.013 | 7.37E-02 | 18391 | -0.070  | -1.793  | 1.653  | 0.879 | -0.080 | -0.001 | 9.36E-01 | 18724 |
| 58  | Occipital_Inf_R      | -1.864 | -3.298  | -0.431 | 0.731 | -2.549 | -0.019 | 1.08E-02 | 18391 | 1.322   | -0.667  | 3.311  | 1.015 | 1.303  | 0.010  | 1.93E-01 | 18724 |
| 59  | Fusiform_L           | -0.494 | -3.209  | 2.220  | 1.385 | -0.357 | -0.003 | 7.21E-01 | 18391 | -5.167  | -8.936  | -1.399 | 1.923 | -2.688 | -0.020 | 7.20E-03 | 18724 |
| 60  | Fusiform_R           | -2.464 | -5.447  | 0.519  | 1.522 | -1.619 | -0.012 | 1.05E-01 | 18391 | -3.991  | -8.134  | 0.153  | 2.114 | -1.888 | -0.014 | 5.91E-02 | 18724 |
| 61  | Postcentral_L        | -4.066 | -8.149  | 0.018  | 2.083 | -1.951 | -0.014 | 5.10E-02 | 18391 | -0.821  | -6.484  | 4.842  | 2.889 | -0.284 | -0.002 | 7.76E-01 | 18724 |
| 62  | Postcentral_R        | -3.282 | -7.470  | 0.905  | 2.136 | -1.537 | -0.011 | 1.24E-01 | 18391 | -5.196  | -11.002 | 0.611  | 2.962 | -1.754 | -0.013 | 7.95E-02 | 18724 |
| 63  | Parietal_Sup_L       | -0.988 | -3.340  | 1.364  | 1.200 | -0.823 | -0.006 | 4.10E-01 | 18391 | -2.126  | -5.392  | 1.139  | 1.666 | -1.276 | -0.009 | 2.02E-01 | 18724 |
| 64  | Parietal_Sup_R       | 0.111  | -1.977  | 2.199  | 1.065 | 0.104  | 0.001  | 9.17E-01 | 18391 | -1.941  | -4.839  | 0.956  | 1.478 | -1.314 | -0.010 | 1.89E-01 | 18724 |
| 65  | Parietal_Inf_L       | -1.426 | -4.508  | 1.655  | 1.572 | -0.907 | -0.007 | 3.64E-01 | 18391 | -4.430  | -8.702  | -0.158 | 2.179 | -2.033 | -0.015 | 4.21E-02 | 18724 |
| 66  | Parietal_Inf_R       | -0.226 | -2.218  | 1.766  | 1.017 | -0.222 | -0.002 | 8.24E-01 | 18391 | -1.211  | -3.980  | 1.559  | 1.413 | -0.857 | -0.006 | 3.91E-01 | 18724 |
| 67  | SupraMarginal_L      | -2.210 | -4.015  | -0.404 | 0.921 | -2.399 | -0.018 | 1.65E-02 | 18391 | -0.495  | -3.000  | 2.009  | 1.278 | -0.388 | -0.003 | 6.98E-01 | 18724 |
| 68  | SupraMarginal_R      | -1.809 | -4.364  | 0.745  | 1.303 | -1.388 | -0.010 | 1.65E-01 | 18391 | -0.275  | -3.819  | 3.269  | 1.808 | -0.152 | -0.001 | 8.79E-01 | 18724 |
| 69  | Angular_L            | -0.448 | -2.221  | 1.325  | 0.905 | -0.495 | -0.004 | 6.21E-01 | 18391 | -2.340  | -4.802  | 0.121  | 1.256 | -1.863 | -0.014 | 6.24E-02 | 18724 |
| 70  | Angular_R            | -0.641 | -3.020  | 1.739  | 1.214 | -0.528 | -0.004 | 5.98E-01 | 18391 | -2.207  | -5.508  | 1.095  | 1.684 | -1.310 | -0.010 | 1.90E-01 | 18724 |
| 71  | Precuneus_L          | 0.457  | -3.868  | 4.781  | 2.206 | 0.207  | 0.002  | 8.36E-01 | 18391 | -12.310 | -18.306 | -6.315 | 3.059 | -4.025 | -0.029 | 5.73E-05 | 18724 |
| 72  | Precuneus_R          | 0.269  | -3.585  | 4.123  | 1.966 | 0.137  | 0.001  | 8.91E-01 | 18391 | -6.566  | -11.909 | -1.222 | 2.726 | -2.408 | -0.018 | 1.60E-02 | 18724 |
| 73  | Paracentral_Lobule_L | -0.862 | -2.839  | 1.115  | 1.009 | -0.854 | -0.006 | 3.93E-01 | 18391 | -1.035  | -3.783  | 1.713  | 1.402 | -0.738 | -0.005 | 4.60E-01 | 18724 |
| 74  | Paracentral_Lobule_R | -1.191 | -2.606  | 0.225  | 0.722 | -1.649 | -0.012 | 9.92E-02 | 18391 | -1.174  | -3.141  | 0.794  | 1.004 | -1.169 | -0.009 | 2.42E-01 | 18724 |
| 75  | Caudate_L            | -0.538 | -2.117  | 1.041  | 0.806 | -0.668 | -0.005 | 5.04E-01 | 18391 | 0.621   | -1.573  | 2.816  | 1.120 | 0.555  | 0.004  | 5.79E-01 | 18724 |
| 76  | Caudate_R            | -0.416 | -2.204  | 1.372  | 0.912 | -0.456 | -0.003 | 6.48E-01 | 18391 | 1.137   | -1.348  | 3.621  | 1.268 | 0.897  | 0.007  | 3.70E-01 | 18724 |
| 77  | Putamen_L            | 0.377  | -2.021  | 2.776  | 1.224 | 0.308  | 0.002  | 7.58E-01 | 18391 | 0.449   | -2.884  | 3.782  | 1.700 | 0.264  | 0.002  | 7.92E-01 | 18724 |
| 78  | Putamen_R            | -0.005 | -2.448  | 2.438  | 1.246 | -0.004 | 0.000  | 9.97E-01 | 18391 | 0.264   | -3.130  | 3.658  | 1.731 | 0.152  | 0.001  | 8.79E-01 | 18724 |
| 79  | Pallidum_L           | 0.015  | -0.198  | 0.228  | 0.109 | 0.138  | 0.001  | 8.90E-01 | 18391 | 0.062   | -0.234  | 0.358  | 0.151 | 0.409  | 0.003  | 6.82E-01 | 18724 |
| 80  | Pallidum_R           | -0.096 | -0.331  | 0.138  | 0.119 | -0.808 | -0.006 | 4.19E-01 | 18391 | 0.074   | -0.252  | 0.399  | 0.166 | 0.444  | 0.003  | 6.57E-01 | 18724 |
| 83  | Heschl_L             | -0.326 | -0.759  | 0.106  | 0.221 | -1.479 | -0.011 | 1.39E-01 | 18391 | -0.033  | -0.634  | 0.567  | 0.306 | -0.109 | -0.001 | 9.13E-01 | 18724 |
| 84  | Heschl_R             | -0.636 | -1.120  | -0.153 | 0.247 | -2.579 | -0.019 | 9.92E-03 | 18391 | 0.140   | -0.530  | 0.811  | 0.342 | 0.410  | 0.003  | 6.82E-01 | 18724 |
| 85  | Temporal_Sup_L       | -3.943 | -7.068  | -0.817 | 1.595 | -2.472 | -0.018 | 1.34E-02 | 18391 | 1.193   | -3.141  | 5.527  | 2.211 | 0.540  | 0.004  | 5.90E-01 | 18724 |
| 86  | Temporal_Sup_R       | -4.955 | -8.412  | -1.498 | 1.764 | -2.809 | -0.021 | 4.97E-03 | 18391 | 4.280   | -0.514  | 9.074  | 2.446 | 1.750  | 0.013  | 8.02E-02 | 18724 |
| 87  | Temporal_Pole_Sup_L  | -0.685 | -2.166  | 0.796  | 0.755 | -0.907 | -0.007 | 3.64E-01 | 18391 | 0.358   | -1.698  | 2.413  | 1.049 | 0.341  | 0.002  | 7.33E-01 | 18724 |
| 88  | Temporal_Pole_Sup_R  | -0.714 | -2.272  | 0.843  | 0.795 | -0.899 | -0.007 | 3.69E-01 | 18391 | 0.341   | -1.823  | 2.504  | 1.104 | 0.309  | 0.002  | 7.58E-01 | 18724 |
| 89  | Temporal_Mid_L       | -5.940 | -11.147 | -0.732 | 2.657 | -2.236 | -0.016 | 2.54E-02 | 18391 | 0.454   | -6.774  | 7.682  | 3.688 | 0.123  | 0.001  | 9.02E-01 | 18724 |
| 90  | Temporal_Mid_R       | -2.201 | -6.824  | 2.422  | 2.359 | -0.933 | -0.007 | 3.51E-01 | 18391 | -1.099  | -7.519  | 5.321  | 3.275 | -0.335 | -0.002 | 7.37E-01 | 18724 |
| 91  | Temporal_Pole_Mid_L  | 0.130  | -1.114  | 1.374  | 0.635 | 0.205  | 0.002  | 8.38E-01 | 18391 | -1.534  | -3.262  | 0.193  | 0.881 | -1.741 | -0.013 | 8.17E-02 | 18724 |
| 92  | Temporal_Pole_Mid_R  | -0.477 | -1.988  | 1.033  | 0.770 | -0.620 | -0.005 | 5.36E-01 | 18391 | 0.044   | -2.056  | 2.143  | 1.071 | 0.041  | 0.000  | 9.68E-01 | 18724 |
| 93  | Temporal_Inf_L       | -4.624 | -8.204  | -1.043 | 1.827 | -2.531 | -0.019 | 1.14E-02 | 18391 | -0.692  | -5.664  | 4.280  | 2.537 | -0.273 | -0.002 | 7.85E-01 | 18724 |
| 94  | Temporal_Inf_R       | -3.076 | -6.976  | 0.823  | 1.989 | -1.546 | -0.011 | 1.22E-01 | 18391 | -1.492  | -6.914  | 3.931  | 2.766 | -0.539 | -0.004 | 5.90E-01 | 18724 |
| 95  | Cerebellum_Crus1_L   | -1.888 | -6.142  | 2.366  | 2.170 | -0.870 | -0.006 | 3.84E-01 | 18391 | -6.037  | -11.936 | -0.138 | 3.009 | -2.006 | -0.015 | 4.49E-02 | 18724 |
| 96  | Cerebellum_Crus1_R   | 0.681  | -3.653  | 5.016  | 2.211 | 0.308  | 0.002  | 7.58E-01 | 18391 | -3.996  | -10.014 | 2.022  | 3.070 | -1.301 | -0.010 | 1.93E-01 | 18724 |
| 97  | Cerebellum_Crus2_L   | -2.213 | -5.583  | 1.157  | 1.719 | -1.287 | -0.009 | 1.98E-01 | 18391 | -5.704  | -10.384 | -1.024 | 2.388 | -2.389 | -0.017 | 1.69E-02 | 18724 |
| 98  | Cerebellum_Crus2_R   | -0.890 | -4.004  | 2.224  | 1.589 | -0.560 | -0.004 | 5.75E-01 | 18391 | -2.702  | -7.032  | 1.628  | 2.209 | -1.223 | -0.009 | 2.21E-01 | 18724 |
| 99  | Cerebellum_3_L       | 0.274  | 0.048   | 0.500  | 0.115 | 2.373  | 0.017  | 1.77E-02 | 18391 | -0.131  | -0.445  | 0.183  | 0.160 | -0.818 | -0.006 | 4.14E-01 | 18724 |
| 100 | Cerebellum_3_R       | 0.229  | -0.076  | 0.534  | 0.156 | 1.470  | 0.011  | 1.41E-01 | 18391 | -0.138  | -0.562  | 0.286  | 0.216 | -0.639 | -0.005 | 5.23E-01 | 18724 |
| 101 | Cerebellum_4_5_L     | 1.987  | 0.158   | 3.815  | 0.933 | 2.129  | 0.016  | 3.33E-02 | 18391 | -0.680  | -3.222  | 1.861  | 1.297 | -0.525 | -0.004 | 6.00E-01 | 18724 |
| 102 | Cerebellum_4_5_R     | 0.719  | -0.773  | 2.210  | 0.761 | 0.945  | 0.007  | 3.45E-01 | 18391 | -0.727  | -2.798  | 1.343  | 1.056 | -0.688 | -0.005 | 4.91E-01 | 18724 |

|     |                 |        |        |        |       |        |        |          |       |        |        |        |       |        |        |          |       |
|-----|-----------------|--------|--------|--------|-------|--------|--------|----------|-------|--------|--------|--------|-------|--------|--------|----------|-------|
| 103 | Cerebellum_6_L  | 2.434  | -0.728 | 5.597  | 1.613 | 1.509  | 0.011  | 1.31E-01 | 18391 | -3.569 | -7.960 | 0.823  | 2.241 | -1.593 | -0.012 | 1.11E-01 | 18724 |
| 104 | Cerebellum_6_R  | 2.211  | -1.119 | 5.541  | 1.699 | 1.301  | 0.010  | 1.93E-01 | 18391 | -2.964 | -7.592 | 1.664  | 2.361 | -1.255 | -0.009 | 2.09E-01 | 18724 |
| 105 | Cerebellum_7b_L | -0.444 | -1.473 | 0.585  | 0.525 | -0.846 | -0.006 | 3.98E-01 | 18391 | -0.711 | -2.142 | 0.720  | 0.730 | -0.974 | -0.007 | 3.30E-01 | 18724 |
| 106 | Cerebellum_7b_R | -0.524 | -1.544 | 0.496  | 0.520 | -1.007 | -0.007 | 3.14E-01 | 18391 | -0.430 | -1.848 | 0.988  | 0.724 | -0.594 | -0.004 | 5.52E-01 | 18724 |
| 107 | Cerebellum_8_L  | -1.967 | -5.233 | 1.298  | 1.666 | -1.181 | -0.009 | 2.38E-01 | 18391 | -0.662 | -5.206 | 3.881  | 2.318 | -0.286 | -0.002 | 7.75E-01 | 18724 |
| 108 | Cerebellum_8_R  | -2.246 | -6.501 | 2.009  | 2.171 | -1.035 | -0.008 | 3.01E-01 | 18391 | -1.301 | -7.214 | 4.612  | 3.017 | -0.431 | -0.003 | 6.66E-01 | 18724 |
| 109 | Cerebellum_9_L  | -0.464 | -2.312 | 1.383  | 0.943 | -0.493 | -0.004 | 6.22E-01 | 18391 | 1.200  | -1.369 | 3.769  | 1.311 | 0.916  | 0.007  | 3.60E-01 | 18724 |
| 110 | Cerebellum_9_R  | -0.566 | -2.382 | 1.251  | 0.927 | -0.610 | -0.004 | 5.42E-01 | 18391 | 0.763  | -1.762 | 3.289  | 1.288 | 0.593  | 0.004  | 5.53E-01 | 18724 |
| 111 | Cerebellum_10_L | 0.077  | -0.055 | 0.208  | 0.067 | 1.144  | 0.008  | 2.53E-01 | 18391 | 0.139  | -0.043 | 0.321  | 0.093 | 1.496  | 0.011  | 1.35E-01 | 18724 |
| 112 | Cerebellum_10_R | 0.096  | -0.040 | 0.233  | 0.070 | 1.382  | 0.010  | 1.67E-01 | 18391 | 0.101  | -0.088 | 0.291  | 0.097 | 1.046  | 0.008  | 2.95E-01 | 18724 |
| 113 | Vermis_1_2      | 0.085  | 0.000  | 0.171  | 0.044 | 1.963  | 0.014  | 4.97E-02 | 18391 | -0.026 | -0.144 | 0.093  | 0.060 | -0.429 | -0.003 | 6.68E-01 | 18724 |
| 114 | Vermis_3        | 0.184  | -0.155 | 0.523  | 0.173 | 1.062  | 0.008  | 2.88E-01 | 18391 | -0.201 | -0.672 | 0.270  | 0.240 | -0.836 | -0.006 | 4.03E-01 | 18724 |
| 115 | Vermis_4_5      | -0.421 | -1.417 | 0.575  | 0.508 | -0.828 | -0.006 | 4.08E-01 | 18391 | -0.939 | -2.324 | 0.445  | 0.706 | -1.330 | -0.010 | 1.83E-01 | 18724 |
| 116 | Vermis_6        | 0.298  | -0.256 | 0.852  | 0.283 | 1.054  | 0.008  | 2.92E-01 | 18391 | -0.925 | -1.696 | -0.155 | 0.393 | -2.354 | -0.017 | 1.86E-02 | 18724 |
| 117 | Vermis_7        | 0.285  | -0.029 | 0.599  | 0.160 | 1.781  | 0.013  | 7.49E-02 | 18391 | -0.248 | -0.684 | 0.187  | 0.222 | -1.117 | -0.008 | 2.64E-01 | 18724 |
| 118 | Vermis_8        | 0.517  | 0.002  | 1.032  | 0.263 | 1.966  | 0.014  | 4.93E-02 | 18391 | -0.043 | -0.759 | 0.673  | 0.365 | -0.118 | -0.001 | 9.06E-01 | 18724 |
| 119 | Vermis_9        | 0.195  | -0.222 | 0.612  | 0.213 | 0.916  | 0.007  | 3.60E-01 | 18391 | 0.064  | -0.517 | 0.644  | 0.296 | 0.215  | 0.002  | 8.30E-01 | 18724 |
| 120 | Vermis_10       | 0.014  | -0.102 | 0.130  | 0.059 | 0.235  | 0.002  | 8.14E-01 | 18391 | 0.104  | -0.058 | 0.266  | 0.083 | 1.261  | 0.009  | 2.07E-01 | 18724 |
| 121 | Tha_AV_L        | -0.023 | -0.070 | 0.024  | 0.024 | -0.959 | -0.007 | 3.38E-01 | 18391 | -0.039 | -0.104 | 0.026  | 0.033 | -1.175 | -0.009 | 2.40E-01 | 18724 |
| 122 | Tha_AV_R        | 0.003  | -0.064 | 0.070  | 0.034 | 0.093  | 0.001  | 9.26E-01 | 18391 | -0.046 | -0.139 | 0.046  | 0.047 | -0.979 | -0.007 | 3.27E-01 | 18724 |
| 123 | Tha_LP_L        | -0.013 | -0.065 | 0.039  | 0.026 | -0.482 | -0.004 | 6.30E-01 | 18391 | -0.037 | -0.108 | 0.035  | 0.037 | -0.998 | -0.007 | 3.18E-01 | 18724 |
| 124 | Tha_LP_R        | 0.011  | -0.056 | 0.079  | 0.034 | 0.331  | 0.002  | 7.41E-01 | 18391 | -0.024 | -0.118 | 0.070  | 0.048 | -0.502 | -0.004 | 6.16E-01 | 18724 |
| 125 | Tha_VA_L        | -0.025 | -0.081 | 0.030  | 0.028 | -0.894 | -0.007 | 3.71E-01 | 18391 | -0.033 | -0.110 | 0.043  | 0.039 | -0.855 | -0.006 | 3.93E-01 | 18724 |
| 126 | Tha_VA_R        | -0.007 | -0.075 | 0.061  | 0.035 | -0.190 | -0.001 | 8.49E-01 | 18391 | -0.030 | -0.124 | 0.064  | 0.048 | -0.629 | -0.005 | 5.29E-01 | 18724 |
| 127 | Tha_VL_L        | 0.094  | -0.064 | 0.251  | 0.080 | 1.168  | 0.009  | 2.43E-01 | 18391 | -0.118 | -0.336 | 0.100  | 0.111 | -1.063 | -0.008 | 2.88E-01 | 18724 |
| 128 | Tha_VL_R        | 0.167  | -0.041 | 0.376  | 0.106 | 1.571  | 0.012  | 1.16E-01 | 18391 | -0.149 | -0.439 | 0.140  | 0.148 | -1.011 | -0.007 | 3.12E-01 | 18724 |
| 129 | Tha_VPL_L       | 0.190  | 0.003  | 0.377  | 0.096 | 1.992  | 0.015  | 4.64E-02 | 18391 | 0.026  | -0.234 | 0.286  | 0.132 | 0.197  | 0.001  | 8.44E-01 | 18724 |
| 130 | Tha_VPL_R       | 0.149  | -0.048 | 0.346  | 0.100 | 1.485  | 0.011  | 1.38E-01 | 18391 | 0.104  | -0.169 | 0.377  | 0.139 | 0.744  | 0.005  | 4.57E-01 | 18724 |
| 131 | Tha_IL_L        | 0.000  | -0.080 | 0.081  | 0.041 | 0.009  | 0.000  | 9.92E-01 | 18391 | 0.044  | -0.068 | 0.156  | 0.057 | 0.767  | 0.006  | 4.43E-01 | 18724 |
| 132 | Tha_IL_R        | -0.016 | -0.107 | 0.076  | 0.047 | -0.332 | -0.002 | 7.40E-01 | 18391 | 0.050  | -0.077 | 0.177  | 0.065 | 0.770  | 0.006  | 4.42E-01 | 18724 |
| 133 | Tha_Re_L        | 0.000  | -0.001 | 0.000  | 0.000 | -1.057 | -0.008 | 2.90E-01 | 18391 | 0.000  | 0.000  | 0.001  | 0.000 | 1.753  | 0.013  | 7.96E-02 | 18724 |
| 134 | Tha_Re_R        | 0.000  | -0.003 | 0.003  | 0.001 | 0.121  | 0.001  | 9.04E-01 | 18391 | 0.001  | -0.003 | 0.005  | 0.002 | 0.626  | 0.005  | 5.31E-01 | 18724 |
| 135 | Tha_MDm_L       | -0.186 | -0.785 | 0.414  | 0.306 | -0.607 | -0.004 | 5.44E-01 | 18391 | 0.323  | -0.508 | 1.155  | 0.424 | 0.762  | 0.006  | 4.46E-01 | 18724 |
| 136 | Tha_MDm_R       | -0.131 | -0.827 | 0.566  | 0.355 | -0.368 | -0.003 | 7.13E-01 | 18391 | 0.383  | -0.583 | 1.350  | 0.493 | 0.778  | 0.006  | 4.37E-01 | 18724 |
| 137 | Tha_MDI_L       | -0.017 | -0.121 | 0.087  | 0.053 | -0.318 | -0.002 | 7.51E-01 | 18391 | 0.023  | -0.121 | 0.167  | 0.073 | 0.313  | 0.002  | 7.55E-01 | 18724 |
| 138 | Tha_MDI_R       | 0.004  | -0.114 | 0.122  | 0.060 | 0.066  | 0.000  | 9.47E-01 | 18391 | 0.038  | -0.126 | 0.201  | 0.083 | 0.451  | 0.003  | 6.52E-01 | 18724 |
| 139 | Tha_LGN_L       | -0.001 | -0.016 | 0.015  | 0.008 | -0.074 | -0.001 | 9.41E-01 | 18391 | -0.009 | -0.031 | 0.012  | 0.011 | -0.845 | -0.006 | 3.98E-01 | 18724 |
| 140 | Tha_LGN_R       | -0.003 | -0.037 | 0.030  | 0.017 | -0.178 | -0.001 | 8.59E-01 | 18391 | -0.013 | -0.060 | 0.033  | 0.024 | -0.557 | -0.004 | 5.77E-01 | 18724 |
| 141 | Tha_MGN_L       | -0.013 | -0.041 | 0.015  | 0.014 | -0.897 | -0.007 | 3.69E-01 | 18391 | -0.001 | -0.040 | 0.038  | 0.020 | -0.047 | 0.000  | 9.62E-01 | 18724 |
| 142 | Tha_MGN_R       | -0.020 | -0.050 | 0.011  | 0.016 | -1.269 | -0.009 | 2.05E-01 | 18391 | -0.003 | -0.045 | 0.040  | 0.022 | -0.121 | -0.001 | 9.03E-01 | 18724 |
| 143 | Tha_PuA_L       | -0.014 | -0.047 | 0.020  | 0.017 | -0.808 | -0.006 | 4.19E-01 | 18391 | -0.009 | -0.055 | 0.037  | 0.023 | -0.393 | -0.003 | 6.94E-01 | 18724 |
| 144 | Tha_PuA_R       | -0.034 | -0.103 | 0.035  | 0.035 | -0.974 | -0.007 | 3.30E-01 | 18391 | 0.007  | -0.089 | 0.102  | 0.049 | 0.137  | 0.001  | 8.91E-01 | 18724 |
| 145 | Tha_PuM_L       | -0.223 | -0.883 | 0.436  | 0.337 | -0.664 | -0.005 | 5.07E-01 | 18391 | -0.035 | -0.950 | 0.880  | 0.467 | -0.075 | -0.001 | 9.40E-01 | 18724 |
| 146 | Tha_PuM_R       | -0.186 | -1.007 | 0.635  | 0.419 | -0.444 | -0.003 | 6.57E-01 | 18391 | 0.200  | -0.940 | 1.341  | 0.582 | 0.345  | 0.003  | 7.30E-01 | 18724 |
| 147 | Tha_PuL_L       | -0.015 | -0.135 | 0.106  | 0.061 | -0.239 | -0.002 | 8.11E-01 | 18391 | -0.002 | -0.169 | 0.165  | 0.085 | -0.028 | 0.000  | 9.78E-01 | 18724 |
| 148 | Tha_PuL_R       | -0.026 | -0.217 | 0.166  | 0.098 | -0.262 | -0.002 | 7.94E-01 | 18391 | 0.072  | -0.194 | 0.338  | 0.135 | 0.532  | 0.004  | 5.95E-01 | 18724 |
| 149 | Tha_PuL_L       | 0.026  | -0.007 | 0.059  | 0.017 | 1.555  | 0.011  | 1.20E-01 | 18391 | 0.000  | -0.046 | 0.045  | 0.023 | -0.011 | 0.000  | 9.91E-01 | 18724 |
| 150 | Tha_PuL_R       | 0.023  | -0.020 | 0.066  | 0.022 | 1.042  | 0.008  | 2.97E-01 | 18391 | 0.004  | -0.056 | 0.064  | 0.031 | 0.131  | 0.001  | 8.96E-01 | 18724 |
| 151 | ACC_sub_L       | -0.446 | -0.823 | -0.068 | 0.192 | -2.315 | -0.017 | 2.06E-02 | 18391 | 0.404  | -0.120 | 0.928  | 0.267 | 1.512  | 0.011  | 1.30E-01 | 18724 |

|     |           |        |        |        |       |        |        |          |       |        |        |       |       |        |        |          |       |
|-----|-----------|--------|--------|--------|-------|--------|--------|----------|-------|--------|--------|-------|-------|--------|--------|----------|-------|
| 152 | ACC_sub_R | -0.463 | -0.815 | -0.110 | 0.180 | -2.573 | -0.019 | 1.01E-02 | 18391 | 0.469  | -0.021 | 0.958 | 0.250 | 1.875  | 0.014  | 6.08E-02 | 18724 |
| 153 | ACC_pre_L | -0.505 | -1.473 | 0.462  | 0.493 | -1.024 | -0.008 | 3.06E-01 | 18391 | 0.817  | -0.527 | 2.160 | 0.685 | 1.192  | 0.009  | 2.33E-01 | 18724 |
| 154 | ACC_pre_R | -0.365 | -1.296 | 0.566  | 0.475 | -0.768 | -0.006 | 4.43E-01 | 18391 | 0.924  | -0.370 | 2.217 | 0.660 | 1.400  | 0.010  | 1.62E-01 | 18724 |
| 155 | ACC_sup_L | -0.695 | -1.746 | 0.356  | 0.536 | -1.296 | -0.010 | 1.95E-01 | 18391 | 0.720  | -0.740 | 2.179 | 0.745 | 0.967  | 0.007  | 3.34E-01 | 18724 |
| 156 | ACC_sup_R | -0.115 | -1.204 | 0.974  | 0.556 | -0.207 | -0.002 | 8.36E-01 | 18391 | 0.861  | -0.651 | 2.373 | 0.771 | 1.116  | 0.008  | 2.64E-01 | 18724 |
| 157 | N_Acc_L   | -0.209 | -0.525 | 0.108  | 0.161 | -1.294 | -0.010 | 1.96E-01 | 18391 | 0.210  | -0.229 | 0.649 | 0.224 | 0.937  | 0.007  | 3.49E-01 | 18724 |
| 158 | N_Acc_R   | -0.100 | -0.374 | 0.173  | 0.140 | -0.720 | -0.005 | 4.72E-01 | 18391 | 0.185  | -0.195 | 0.565 | 0.194 | 0.956  | 0.007  | 3.39E-01 | 18724 |
| 159 | VTA_L     | 0.016  | 0.005  | 0.027  | 0.006 | 2.779  | 0.020  | 5.46E-03 | 18391 | 0.003  | -0.012 | 0.019 | 0.008 | 0.441  | 0.003  | 6.59E-01 | 18724 |
| 160 | VTA_R     | 0.013  | 0.003  | 0.024  | 0.005 | 2.633  | 0.019  | 8.48E-03 | 18391 | 0.006  | -0.008 | 0.020 | 0.007 | 0.837  | 0.006  | 4.02E-01 | 18724 |
| 161 | SN_pc_L   | 0.001  | -0.017 | 0.019  | 0.009 | 0.152  | 0.001  | 8.80E-01 | 18391 | 0.004  | -0.021 | 0.029 | 0.013 | 0.295  | 0.002  | 7.68E-01 | 18724 |
| 162 | SN_pc_R   | 0.001  | -0.023 | 0.024  | 0.012 | 0.047  | 0.000  | 9.62E-01 | 18391 | 0.001  | -0.031 | 0.034 | 0.017 | 0.090  | 0.001  | 9.28E-01 | 18724 |
| 163 | SN_pr_L   | 0.001  | -0.024 | 0.025  | 0.012 | 0.049  | 0.000  | 9.61E-01 | 18391 | -0.005 | -0.039 | 0.028 | 0.017 | -0.315 | -0.002 | 7.53E-01 | 18724 |
| 164 | SN_pr_R   | 0.000  | -0.028 | 0.027  | 0.014 | -0.029 | 0.000  | 9.77E-01 | 18391 | 0.005  | -0.033 | 0.043 | 0.019 | 0.245  | 0.002  | 8.06E-01 | 18724 |
| 165 | Red_N_L   | 0.023  | -0.007 | 0.053  | 0.015 | 1.491  | 0.011  | 1.36E-01 | 18391 | 0.014  | -0.028 | 0.055 | 0.021 | 0.638  | 0.005  | 5.23E-01 | 18724 |
| 166 | Red_N_R   | 0.024  | -0.009 | 0.057  | 0.017 | 1.443  | 0.011  | 1.49E-01 | 18391 | 0.021  | -0.024 | 0.066 | 0.023 | 0.907  | 0.007  | 3.64E-01 | 18724 |
| 167 | LC_L      | 0.012  | 0.001  | 0.023  | 0.006 | 2.084  | 0.015  | 3.71E-02 | 18391 | 0.005  | -0.010 | 0.021 | 0.008 | 0.656  | 0.005  | 5.12E-01 | 18724 |
| 168 | LC_R      | 0.001  | -0.011 | 0.013  | 0.006 | 0.171  | 0.001  | 8.64E-01 | 18391 | 0.006  | -0.011 | 0.023 | 0.009 | 0.680  | 0.005  | 4.97E-01 | 18724 |
| 169 | Raphe_D   | 0.019  | -0.024 | 0.062  | 0.022 | 0.858  | 0.006  | 3.91E-01 | 18391 | 0.033  | -0.028 | 0.093 | 0.031 | 1.060  | 0.008  | 2.89E-01 | 18724 |
| 170 | Raphe_M   | 0.017  | 0.004  | 0.030  | 0.007 | 2.489  | 0.018  | 1.28E-02 | 18391 | 0.008  | -0.010 | 0.027 | 0.009 | 0.878  | 0.006  | 3.80E-01 | 18724 |

| Salad / raw vegetable intake |                      |         |          |         |        |        |        |          |       | Poultry intake |          |         |         |        |        |          |       |
|------------------------------|----------------------|---------|----------|---------|--------|--------|--------|----------|-------|----------------|----------|---------|---------|--------|--------|----------|-------|
| Number                       | AAL 3 region         | beta    | 95%CI l  | 95%CI h | se     | t      | r      | p        | df.e  | beta           | 95%CI l  | 95%CI h | se      | t      | r      | p        | df.e  |
| 0                            | Total brain          | -54.236 | -142.943 | 34.471  | 45.257 | -1.198 | -0.009 | 2.31E-01 | 18404 | -39.525        | -235.836 | 156.786 | 100.154 | -0.395 | -0.003 | 6.93E-01 | 18727 |
| 1                            | Precentral_L         | -1.149  | -4.267   | 1.969   | 1.591  | -0.722 | -0.005 | 4.70E-01 | 18404 | -0.515         | -7.422   | 6.392   | 3.524   | -0.146 | -0.001 | 8.84E-01 | 18727 |
| 2                            | Precentral_R         | 0.523   | -2.336   | 3.381   | 1.458  | 0.359  | 0.003  | 7.20E-01 | 18404 | -1.155         | -7.485   | 5.174   | 3.229   | -0.358 | -0.003 | 7.21E-01 | 18727 |
| 3                            | Frontal_Sup_2_L      | -1.776  | -5.071   | 1.519   | 1.681  | -1.057 | -0.008 | 2.91E-01 | 18404 | 0.456          | -6.838   | 7.750   | 3.721   | 0.122  | 0.001  | 9.03E-01 | 18727 |
| 4                            | Frontal_Sup_2_R      | -0.148  | -3.781   | 3.484   | 1.853  | -0.080 | -0.001 | 9.36E-01 | 18404 | 1.375          | -6.661   | 9.411   | 4.100   | 0.335  | 0.002  | 7.37E-01 | 18727 |
| 5                            | Frontal_Mid_2_L      | 0.029   | -3.432   | 3.490   | 1.766  | 0.017  | 0.000  | 9.87E-01 | 18404 | 4.960          | -2.697   | 12.617  | 3.907   | 1.270  | 0.009  | 2.04E-01 | 18727 |
| 6                            | Frontal_Mid_2_R      | -0.107  | -4.020   | 3.805   | 1.996  | -0.054 | 0.000  | 9.57E-01 | 18404 | -2.817         | -11.483  | 5.850   | 4.421   | -0.637 | -0.005 | 5.24E-01 | 18727 |
| 7                            | Frontal_Inf_Oper_L   | -0.272  | -1.294   | 0.750   | 0.522  | -0.521 | -0.004 | 6.02E-01 | 18404 | 0.122          | -2.141   | 2.385   | 1.155   | 0.106  | 0.001  | 9.16E-01 | 18727 |
| 8                            | Frontal_Inf_Oper_R   | -0.691  | -1.972   | 0.591   | 0.654  | -1.056 | -0.008 | 2.91E-01 | 18404 | 0.561          | -2.276   | 3.399   | 1.448   | 0.388  | 0.003  | 6.98E-01 | 18727 |
| 9                            | Frontal_Inf_Tri_L    | -0.605  | -2.777   | 1.567   | 1.108  | -0.546 | -0.004 | 5.85E-01 | 18404 | -0.422         | -5.228   | 4.385   | 2.452   | -0.172 | -0.001 | 8.64E-01 | 18727 |
| 10                           | Frontal_Inf_Tri_R    | 0.875   | -0.829   | 2.579   | 0.869  | 1.006  | 0.007  | 3.14E-01 | 18404 | 0.968          | -2.805   | 4.741   | 1.925   | 0.503  | 0.004  | 6.15E-01 | 18727 |
| 11                           | Frontal_Inf_Orb_2_L  | -0.551  | -1.200   | 0.099   | 0.331  | -1.661 | -0.012 | 9.67E-02 | 18404 | 0.132          | -1.305   | 1.569   | 0.733   | 0.180  | 0.001  | 8.57E-01 | 18727 |
| 12                           | Frontal_Inf_Orb_2_R  | -0.151  | -0.830   | 0.529   | 0.347  | -0.435 | -0.003 | 6.64E-01 | 18404 | 0.525          | -0.978   | 2.028   | 0.767   | 0.685  | 0.005  | 4.94E-01 | 18727 |
| 13                           | Rolandic_Oper_L      | -0.877  | -1.859   | 0.104   | 0.501  | -1.752 | -0.013 | 7.99E-02 | 18404 | -0.221         | -2.394   | 1.952   | 1.109   | -0.199 | -0.001 | 8.42E-01 | 18727 |
| 14                           | Rolandic_Oper_R      | -0.378  | -1.785   | 1.028   | 0.718  | -0.527 | -0.004 | 5.98E-01 | 18404 | -0.294         | -3.404   | 2.816   | 1.587   | -0.185 | -0.001 | 8.53E-01 | 18727 |
| 15                           | Supp_Motor_Area_L    | -0.404  | -2.737   | 1.928   | 1.190  | -0.340 | -0.003 | 7.34E-01 | 18404 | -1.807         | -6.972   | 3.359   | 2.635   | -0.686 | -0.005 | 4.93E-01 | 18727 |
| 16                           | Supp_Motor_Area_R    | 0.695   | -1.881   | 3.271   | 1.314  | 0.529  | 0.004  | 5.97E-01 | 18404 | -1.474         | -7.181   | 4.234   | 2.912   | -0.506 | -0.004 | 6.13E-01 | 18727 |
| 17                           | Olfactory_L          | -0.231  | -0.578   | 0.117   | 0.177  | -1.303 | -0.010 | 1.93E-01 | 18404 | 0.484          | -0.284   | 1.252   | 0.392   | 1.235  | 0.009  | 2.17E-01 | 18727 |
| 18                           | Olfactory_R          | -0.250  | -0.598   | 0.099   | 0.178  | -1.405 | -0.010 | 1.60E-01 | 18404 | 0.339          | -0.431   | 1.109   | 0.393   | 0.862  | 0.006  | 3.88E-01 | 18727 |
| 19                           | Frontal_Sup_Medial_L | -1.720  | -3.908   | 0.468   | 1.116  | -1.541 | -0.011 | 1.23E-01 | 18404 | -1.448         | -6.288   | 3.392   | 2.469   | -0.586 | -0.004 | 5.58E-01 | 18727 |
| 20                           | Frontal_Sup_Medial_R | -0.747  | -2.340   | 0.847   | 0.813  | -0.918 | -0.007 | 3.58E-01 | 18404 | -1.221         | -4.744   | 2.303   | 1.798   | -0.679 | -0.005 | 4.97E-01 | 18727 |
| 21                           | Frontal_Med_Orb_L    | -0.968  | -1.786   | -0.151  | 0.417  | -2.321 | -0.017 | 2.03E-02 | 18404 | 0.196          | -1.613   | 2.006   | 0.923   | 0.212  | 0.002  | 8.32E-01 | 18727 |
| 22                           | Frontal_Med_Orb_R    | -1.154  | -2.159   | -0.150  | 0.513  | -2.252 | -0.017 | 2.43E-02 | 18404 | -0.959         | -3.183   | 1.264   | 1.134   | -0.846 | -0.006 | 3.98E-01 | 18727 |
| 23                           | Rectus_L             | -0.517  | -1.364   | 0.330   | 0.432  | -1.197 | -0.009 | 2.31E-01 | 18404 | -0.849         | -2.721   | 1.023   | 0.955   | -0.889 | -0.006 | 3.74E-01 | 18727 |
| 24                           | Rectus_R             | -0.270  | -1.053   | 0.513   | 0.399  | -0.675 | -0.005 | 5.00E-01 | 18404 | -1.144         | -2.876   | 0.587   | 0.884   | -1.295 | -0.009 | 1.95E-01 | 18727 |
| 25                           | OFCmed_L             | -0.366  | -0.857   | 0.125   | 0.250  | -1.460 | -0.011 | 1.44E-01 | 18404 | -0.521         | -1.606   | 0.564   | 0.554   | -0.942 | -0.007 | 3.46E-01 | 18727 |
| 26                           | OFCmed_R             | -0.593  | -1.164   | -0.021  | 0.292  | -2.032 | -0.015 | 4.22E-02 | 18404 | -0.286         | -1.550   | 0.979   | 0.645   | -0.443 | -0.003 | 6.58E-01 | 18727 |
| 27                           | OFCant_L             | -0.533  | -1.101   | 0.034   | 0.289  | -1.842 | -0.014 | 6.55E-02 | 18404 | 0.013          | -1.242   | 1.268   | 0.640   | 0.020  | 0.000  | 9.84E-01 | 18727 |

|    |                      |        |        |        |       |        |        |          |       |        |         |        |       |        |        |          |       |
|----|----------------------|--------|--------|--------|-------|--------|--------|----------|-------|--------|---------|--------|-------|--------|--------|----------|-------|
| 28 | OFCant_R             | -0.674 | -1.424 | 0.076  | 0.383 | -1.762 | -0.013 | 7.82E-02 | 18404 | -0.122 | -1.779  | 1.536  | 0.846 | -0.144 | -0.001 | 8.85E-01 | 18727 |
| 29 | OFCpost_L            | -0.709 | -1.419 | 0.001  | 0.362 | -1.958 | -0.014 | 5.02E-02 | 18404 | 0.295  | -1.277  | 1.867  | 0.802 | 0.368  | 0.003  | 7.13E-01 | 18727 |
| 30 | OFCpost_R            | -0.757 | -1.413 | -0.100 | 0.335 | -2.259 | -0.017 | 2.39E-02 | 18404 | 0.189  | -1.263  | 1.642  | 0.741 | 0.255  | 0.002  | 7.98E-01 | 18727 |
| 31 | OFClat_L             | -0.182 | -0.422 | 0.058  | 0.122 | -1.489 | -0.011 | 1.37E-01 | 18404 | -0.133 | -0.663  | 0.397  | 0.270 | -0.493 | -0.004 | 6.22E-01 | 18727 |
| 32 | OFClat_R             | -0.093 | -0.295 | 0.110  | 0.103 | -0.897 | -0.007 | 3.70E-01 | 18404 | -0.043 | -0.491  | 0.405  | 0.228 | -0.189 | -0.001 | 8.50E-01 | 18727 |
| 33 | Insula_L             | -1.182 | -3.379 | 1.015  | 1.121 | -1.055 | -0.008 | 2.92E-01 | 18404 | -1.567 | -6.426  | 3.292  | 2.479 | -0.632 | -0.005 | 5.27E-01 | 18727 |
| 34 | Insula_R             | -0.720 | -2.860 | 1.421  | 1.092 | -0.659 | -0.005 | 5.10E-01 | 18404 | -2.220 | -6.954  | 2.515  | 2.416 | -0.919 | -0.007 | 3.58E-01 | 18727 |
| 37 | Cingulate_Mid_L      | 1.467  | -0.390 | 3.324  | 0.947 | 1.549  | 0.011  | 1.21E-01 | 18404 | -1.145 | -5.250  | 2.960  | 2.094 | -0.547 | -0.004 | 5.85E-01 | 18727 |
| 38 | Cingulate_Mid_R      | 0.912  | -1.067 | 2.892  | 1.010 | 0.903  | 0.007  | 3.66E-01 | 18404 | -1.943 | -6.322  | 2.435  | 2.234 | -0.870 | -0.006 | 3.84E-01 | 18727 |
| 39 | Cingulate_Post_L     | -0.433 | -1.000 | 0.134  | 0.289 | -1.496 | -0.011 | 1.35E-01 | 18404 | -0.580 | -1.835  | 0.674  | 0.640 | -0.907 | -0.007 | 3.65E-01 | 18727 |
| 40 | Cingulate_Post_R     | -0.252 | -0.566 | 0.063  | 0.161 | -1.567 | -0.012 | 1.17E-01 | 18404 | -0.214 | -0.910  | 0.482  | 0.355 | -0.602 | -0.004 | 5.47E-01 | 18727 |
| 41 | Hippocampus_L        | 0.573  | -0.344 | 1.490  | 0.468 | 1.226  | 0.009  | 2.20E-01 | 18404 | -1.267 | -3.296  | 0.763  | 1.035 | -1.223 | -0.009 | 2.21E-01 | 18727 |
| 42 | Hippocampus_R        | 0.692  | -0.259 | 1.643  | 0.485 | 1.426  | 0.011  | 1.54E-01 | 18404 | -0.288 | -2.392  | 1.816  | 1.073 | -0.268 | -0.002 | 7.88E-01 | 18727 |
| 43 | ParaHippocampaL_L    | 0.432  | -0.382 | 1.246  | 0.415 | 1.041  | 0.008  | 2.98E-01 | 18404 | -1.301 | -3.104  | 0.503  | 0.920 | -1.414 | -0.010 | 1.57E-01 | 18727 |
| 44 | ParaHippocampaL_R    | 0.901  | -0.128 | 1.930  | 0.525 | 1.717  | 0.013  | 8.60E-02 | 18404 | -1.122 | -3.397  | 1.154  | 1.161 | -0.966 | -0.007 | 3.34E-01 | 18727 |
| 45 | Amygdala_L           | -0.031 | -0.348 | 0.286  | 0.162 | -0.193 | -0.001 | 8.47E-01 | 18404 | -0.365 | -1.066  | 0.336  | 0.358 | -1.021 | -0.007 | 3.07E-01 | 18727 |
| 46 | Amygdala_R           | -0.089 | -0.413 | 0.235  | 0.165 | -0.537 | -0.004 | 5.91E-01 | 18404 | -0.254 | -0.971  | 0.463  | 0.366 | -0.695 | -0.005 | 4.87E-01 | 18727 |
| 47 | Calcarine_L          | -0.965 | -3.986 | 2.056  | 1.541 | -0.626 | -0.005 | 5.31E-01 | 18404 | 6.349  | -0.337  | 13.035 | 3.411 | 1.861  | 0.014  | 6.27E-02 | 18727 |
| 48 | Calcarine_R          | -1.052 | -3.576 | 1.473  | 1.288 | -0.817 | -0.006 | 4.14E-01 | 18404 | 3.568  | -2.020  | 9.156  | 2.851 | 1.252  | 0.009  | 2.11E-01 | 18727 |
| 49 | Cuneus_L             | 0.128  | -1.767 | 2.023  | 0.967 | 0.132  | 0.001  | 8.95E-01 | 18404 | 2.921  | -1.274  | 7.115  | 2.140 | 1.365  | 0.010  | 1.72E-01 | 18727 |
| 50 | Cuneus_R             | -0.729 | -2.180 | 0.723  | 0.740 | -0.984 | -0.007 | 3.25E-01 | 18404 | 0.601  | -2.609  | 3.811  | 1.638 | 0.367  | 0.003  | 7.14E-01 | 18727 |
| 51 | Lingual_L            | 0.500  | -1.319 | 2.318  | 0.928 | 0.539  | 0.004  | 5.90E-01 | 18404 | 3.331  | -0.689  | 7.351  | 2.051 | 1.624  | 0.012  | 1.04E-01 | 18727 |
| 52 | Lingual_R            | -0.328 | -2.233 | 1.576  | 0.971 | -0.338 | -0.002 | 7.35E-01 | 18404 | 2.079  | -2.134  | 6.293  | 2.150 | 0.967  | 0.007  | 3.33E-01 | 18727 |
| 53 | Occipital_Sup_L      | 0.344  | -0.906 | 1.594  | 0.638 | 0.540  | 0.004  | 5.89E-01 | 18404 | 1.488  | -1.276  | 4.252  | 1.410 | 1.055  | 0.008  | 2.91E-01 | 18727 |
| 54 | Occipital_Sup_R      | -0.392 | -1.747 | 0.963  | 0.691 | -0.567 | -0.004 | 5.71E-01 | 18404 | 1.514  | -1.482  | 4.511  | 1.529 | 0.991  | 0.007  | 3.22E-01 | 18727 |
| 55 | Occipital_Mid_L      | -0.940 | -3.868 | 1.988  | 1.494 | -0.629 | -0.005 | 5.29E-01 | 18404 | 2.639  | -3.841  | 9.120  | 3.306 | 0.798  | 0.006  | 4.25E-01 | 18727 |
| 56 | Occipital_Mid_R      | -1.773 | -3.810 | 0.263  | 1.039 | -1.707 | -0.013 | 8.79E-02 | 18404 | 2.027  | -2.482  | 6.536  | 2.300 | 0.881  | 0.006  | 3.78E-01 | 18727 |
| 57 | Occipital_Inf_L      | -1.438 | -2.411 | -0.466 | 0.496 | -2.900 | -0.021 | 3.74E-03 | 18404 | 1.124  | -1.027  | 3.276  | 1.098 | 1.024  | 0.007  | 3.06E-01 | 18727 |
| 58 | Occipital_Inf_R      | -1.268 | -2.391 | -0.145 | 0.573 | -2.213 | -0.016 | 2.69E-02 | 18404 | -0.114 | -2.599  | 2.370  | 1.268 | -0.090 | -0.001 | 9.28E-01 | 18727 |
| 59 | Fusiform_L           | -0.043 | -2.172 | 2.086  | 1.086 | -0.039 | 0.000  | 9.69E-01 | 18404 | -1.225 | -5.934  | 3.485  | 2.403 | -0.510 | -0.004 | 6.10E-01 | 18727 |
| 60 | Fusiform_R           | -0.272 | -2.611 | 2.067  | 1.193 | -0.228 | -0.002 | 8.20E-01 | 18404 | -1.375 | -6.553  | 3.804  | 2.642 | -0.520 | -0.004 | 6.03E-01 | 18727 |
| 61 | Postcentral_L        | 1.419  | -1.783 | 4.620  | 1.633 | 0.869  | 0.006  | 3.85E-01 | 18404 | -4.022 | -11.100 | 3.056  | 3.611 | -1.114 | -0.008 | 2.65E-01 | 18727 |
| 62 | Postcentral_R        | 2.770  | -0.514 | 6.053  | 1.675 | 1.653  | 0.012  | 9.83E-02 | 18404 | -3.563 | -10.820 | 3.694  | 3.702 | -0.962 | -0.007 | 3.36E-01 | 18727 |
| 63 | Parietal_Sup_L       | -0.291 | -2.136 | 1.553  | 0.941 | -0.309 | -0.002 | 7.57E-01 | 18404 | -1.194 | -5.274  | 2.886  | 2.081 | -0.574 | -0.004 | 5.66E-01 | 18727 |
| 64 | Parietal_Sup_R       | 0.312  | -1.324 | 1.949  | 0.835 | 0.374  | 0.003  | 7.08E-01 | 18404 | 1.494  | -2.124  | 5.113  | 1.846 | 0.809  | 0.006  | 4.18E-01 | 18727 |
| 65 | Parietal_Inf_L       | -1.729 | -4.145 | 0.687  | 1.233 | -1.403 | -0.010 | 1.61E-01 | 18404 | -1.453 | -6.795  | 3.890  | 2.726 | -0.533 | -0.004 | 5.94E-01 | 18727 |
| 66 | Parietal_Inf_R       | 0.080  | -1.485 | 1.644  | 0.798 | 0.100  | 0.001  | 9.21E-01 | 18404 | -2.064 | -5.525  | 1.397  | 1.766 | -1.169 | -0.009 | 2.42E-01 | 18727 |
| 67 | SupraMarginal_L      | -0.979 | -2.394 | 0.436  | 0.722 | -1.356 | -0.010 | 1.75E-01 | 18404 | -2.793 | -5.923  | 0.337  | 1.597 | -1.749 | -0.013 | 8.03E-02 | 18727 |
| 68 | SupraMarginal_R      | 0.509  | -1.493 | 2.511  | 1.021 | 0.498  | 0.004  | 6.18E-01 | 18404 | -4.157 | -8.585  | 0.272  | 2.259 | -1.840 | -0.013 | 6.58E-02 | 18727 |
| 69 | Angular_L            | -0.465 | -1.856 | 0.925  | 0.710 | -0.656 | -0.005 | 5.12E-01 | 18404 | -1.707 | -4.783  | 1.368  | 1.569 | -1.088 | -0.008 | 2.77E-01 | 18727 |
| 70 | Angular_R            | 0.013  | -1.850 | 1.877  | 0.951 | 0.014  | 0.000  | 9.89E-01 | 18404 | 0.510  | -3.616  | 4.635  | 2.105 | 0.242  | 0.002  | 8.09E-01 | 18727 |
| 71 | Precuneus_L          | 0.290  | -3.099 | 3.679  | 1.729 | 0.168  | 0.001  | 8.67E-01 | 18404 | -1.969 | -9.461  | 5.523  | 3.822 | -0.515 | -0.004 | 6.06E-01 | 18727 |
| 72 | Precuneus_R          | -0.929 | -3.951 | 2.092  | 1.541 | -0.603 | -0.004 | 5.47E-01 | 18404 | -0.468 | -7.144  | 6.208  | 3.406 | -0.137 | -0.001 | 8.91E-01 | 18727 |
| 73 | Paracentral_Lobule_L | 0.929  | -0.621 | 2.478  | 0.791 | 1.174  | 0.009  | 2.40E-01 | 18404 | -2.894 | -6.326  | 0.538  | 1.751 | -1.653 | -0.012 | 9.84E-02 | 18727 |
| 74 | Paracentral_Lobule_R | 0.256  | -0.856 | 1.367  | 0.567 | 0.451  | 0.003  | 6.52E-01 | 18404 | -0.631 | -3.089  | 1.826  | 1.254 | -0.503 | -0.004 | 6.15E-01 | 18727 |
| 75 | Caudate_L            | 0.294  | -0.947 | 1.535  | 0.633 | 0.464  | 0.003  | 6.42E-01 | 18404 | 0.092  | -2.649  | 2.834  | 1.399 | 0.066  | 0.000  | 9.47E-01 | 18727 |
| 76 | Caudate_R            | 0.085  | -1.318 | 1.488  | 0.716 | 0.119  | 0.001  | 9.06E-01 | 18404 | 0.561  | -2.543  | 3.665  | 1.583 | 0.354  | 0.003  | 7.23E-01 | 18727 |
| 77 | Putamen_L            | -1.065 | -2.948 | 0.817  | 0.960 | -1.109 | -0.008 | 2.67E-01 | 18404 | 1.825  | -2.340  | 5.990  | 2.125 | 0.859  | 0.006  | 3.90E-01 | 18727 |
| 78 | Putamen_R            | -1.129 | -3.046 | 0.787  | 0.978 | -1.155 | -0.009 | 2.48E-01 | 18404 | -0.037 | -4.278  | 4.204  | 2.164 | -0.017 | 0.000  | 9.86E-01 | 18727 |

|     |                     |        |        |        |       |        |        |          |       |        |         |        |       |        |        |          |       |
|-----|---------------------|--------|--------|--------|-------|--------|--------|----------|-------|--------|---------|--------|-------|--------|--------|----------|-------|
| 79  | Pallidum_L          | 0.059  | -0.108 | 0.227  | 0.085 | 0.695  | 0.005  | 4.87E-01 | 18404 | 0.091  | -0.279  | 0.461  | 0.189 | 0.483  | 0.004  | 6.29E-01 | 18727 |
| 80  | Pallidum_R          | -0.017 | -0.200 | 0.167  | 0.094 | -0.177 | -0.001 | 8.59E-01 | 18404 | 0.038  | -0.369  | 0.444  | 0.207 | 0.181  | 0.001  | 8.56E-01 | 18727 |
| 83  | Heschl_L            | -0.341 | -0.680 | -0.002 | 0.173 | -1.970 | -0.015 | 4.88E-02 | 18404 | -0.053 | -0.804  | 0.697  | 0.383 | -0.139 | -0.001 | 8.89E-01 | 18727 |
| 84  | Heschl_R            | -0.021 | -0.400 | 0.358  | 0.193 | -0.110 | -0.001 | 9.12E-01 | 18404 | 0.154  | -0.685  | 0.992  | 0.428 | 0.360  | 0.003  | 7.19E-01 | 18727 |
| 85  | TemporaL_Sup_L      | -3.054 | -5.504 | -0.604 | 1.250 | -2.444 | -0.018 | 1.46E-02 | 18404 | -3.242 | -8.660  | 2.175  | 2.764 | -1.173 | -0.009 | 2.41E-01 | 18727 |
| 86  | TemporaL_Sup_R      | -2.036 | -4.745 | 0.674  | 1.382 | -1.472 | -0.011 | 1.41E-01 | 18404 | -2.307 | -8.300  | 3.686  | 3.057 | -0.755 | -0.006 | 4.51E-01 | 18727 |
| 87  | TemporaL_Pole_Sup_L | -0.789 | -1.948 | 0.370  | 0.591 | -1.335 | -0.010 | 1.82E-01 | 18404 | -1.454 | -4.022  | 1.114  | 1.310 | -1.110 | -0.008 | 2.67E-01 | 18727 |
| 88  | TemporaL_Pole_Sup_R | -1.157 | -2.378 | 0.064  | 0.623 | -1.857 | -0.014 | 6.33E-02 | 18404 | -0.739 | -3.443  | 1.965  | 1.380 | -0.536 | -0.004 | 5.92E-01 | 18727 |
| 89  | TemporaL_Mid_L      | -1.600 | -5.682 | 2.483  | 2.083 | -0.768 | -0.006 | 4.42E-01 | 18404 | -6.205 | -15.237 | 2.826  | 4.608 | -1.347 | -0.010 | 1.78E-01 | 18727 |
| 90  | TemporaL_Mid_R      | -1.400 | -5.025 | 2.226  | 1.850 | -0.757 | -0.006 | 4.49E-01 | 18404 | -3.066 | -11.088 | 4.957  | 4.093 | -0.749 | -0.005 | 4.54E-01 | 18727 |
| 91  | TemporaL_Pole_Mid_L | -0.047 | -1.022 | 0.927  | 0.497 | -0.095 | -0.001 | 9.24E-01 | 18404 | -2.051 | -4.209  | 0.107  | 1.101 | -1.863 | -0.014 | 6.25E-02 | 18727 |
| 92  | TemporaL_Pole_Mid_R | -0.401 | -1.586 | 0.783  | 0.604 | -0.664 | -0.005 | 5.07E-01 | 18404 | -0.749 | -3.371  | 1.874  | 1.338 | -0.559 | -0.004 | 5.76E-01 | 18727 |
| 93  | TemporaL_Inf_L      | -0.697 | -3.504 | 2.111  | 1.432 | -0.486 | -0.004 | 6.27E-01 | 18404 | -3.162 | -9.371  | 3.048  | 3.168 | -0.998 | -0.007 | 3.18E-01 | 18727 |
| 94  | TemporaL_Inf_R      | -0.984 | -4.047 | 2.078  | 1.563 | -0.630 | -0.005 | 5.29E-01 | 18404 | -2.232 | -9.005  | 4.541  | 3.455 | -0.646 | -0.005 | 5.18E-01 | 18727 |
| 95  | Cerebellum_Crus1_L  | -3.535 | -6.866 | -0.203 | 1.700 | -2.080 | -0.015 | 3.76E-02 | 18404 | 3.433  | -3.938  | 10.804 | 3.761 | 0.913  | 0.007  | 3.61E-01 | 18727 |
| 96  | Cerebellum_Crus1_R  | -2.262 | -5.658 | 1.135  | 1.733 | -1.305 | -0.010 | 1.92E-01 | 18404 | 4.269  | -3.248  | 11.786 | 3.835 | 1.113  | 0.008  | 2.66E-01 | 18727 |
| 97  | Cerebellum_Crus2_L  | -3.216 | -5.859 | -0.574 | 1.348 | -2.386 | -0.018 | 1.71E-02 | 18404 | -2.330 | -8.180  | 3.520  | 2.985 | -0.781 | -0.006 | 4.35E-01 | 18727 |
| 98  | Cerebellum_Crus2_R  | -1.172 | -3.616 | 1.272  | 1.247 | -0.940 | -0.007 | 3.47E-01 | 18404 | -2.530 | -7.940  | 2.880  | 2.760 | -0.917 | -0.007 | 3.59E-01 | 18727 |
| 99  | Cerebellum_3_L      | 0.065  | -0.113 | 0.242  | 0.091 | 0.717  | 0.005  | 4.73E-01 | 18404 | 0.408  | 0.015   | 0.800  | 0.200 | 2.035  | 0.015  | 4.18E-02 | 18727 |
| 100 | Cerebellum_3_R      | 0.001  | -0.238 | 0.241  | 0.122 | 0.011  | 0.000  | 9.91E-01 | 18404 | 0.342  | -0.187  | 0.872  | 0.270 | 1.267  | 0.009  | 2.05E-01 | 18727 |
| 101 | Cerebellum_4_5_L    | 0.167  | -1.266 | 1.601  | 0.731 | 0.229  | 0.002  | 8.19E-01 | 18404 | 2.202  | -0.972  | 5.377  | 1.619 | 1.360  | 0.010  | 1.74E-01 | 18727 |
| 102 | Cerebellum_4_5_R    | -0.037 | -1.206 | 1.132  | 0.597 | -0.062 | 0.000  | 9.51E-01 | 18404 | 0.824  | -1.762  | 3.411  | 1.320 | 0.625  | 0.005  | 5.32E-01 | 18727 |
| 103 | Cerebellum_6_L      | -0.395 | -2.874 | 2.084  | 1.265 | -0.312 | -0.002 | 7.55E-01 | 18404 | 0.559  | -4.926  | 6.045  | 2.799 | 0.200  | 0.001  | 8.42E-01 | 18727 |
| 104 | Cerebellum_6_R      | -0.194 | -2.806 | 2.418  | 1.332 | -0.146 | -0.001 | 8.84E-01 | 18404 | 2.191  | -3.589  | 7.971  | 2.949 | 0.743  | 0.005  | 4.58E-01 | 18727 |
| 105 | Cerebellum_7b_L     | -0.796 | -1.604 | 0.011  | 0.412 | -1.932 | -0.014 | 5.33E-02 | 18404 | -0.556 | -2.345  | 1.232  | 0.912 | -0.610 | -0.004 | 5.42E-01 | 18727 |
| 106 | Cerebellum_7b_R     | -0.494 | -1.295 | 0.307  | 0.409 | -1.209 | -0.009 | 2.27E-01 | 18404 | -1.407 | -3.180  | 0.365  | 0.904 | -1.557 | -0.011 | 1.20E-01 | 18727 |
| 107 | Cerebellum_8_L      | -2.100 | -4.663 | 0.462  | 1.307 | -1.607 | -0.012 | 1.08E-01 | 18404 | -1.851 | -7.525  | 3.823  | 2.895 | -0.640 | -0.005 | 5.22E-01 | 18727 |
| 108 | Cerebellum_8_R      | -3.914 | -7.251 | -0.576 | 1.703 | -2.298 | -0.017 | 2.16E-02 | 18404 | -5.455 | -12.843 | 1.934  | 3.769 | -1.447 | -0.011 | 1.48E-01 | 18727 |
| 109 | Cerebellum_9_L      | -1.276 | -2.725 | 0.173  | 0.739 | -1.726 | -0.013 | 8.44E-02 | 18404 | -0.012 | -3.219  | 3.195  | 1.636 | -0.008 | 0.000  | 9.94E-01 | 18727 |
| 110 | Cerebellum_9_R      | -1.244 | -2.669 | 0.182  | 0.727 | -1.710 | -0.013 | 8.74E-02 | 18404 | 0.401  | -2.752  | 3.554  | 1.609 | 0.249  | 0.002  | 8.03E-01 | 18727 |
| 111 | Cerebellum_10_L     | -0.155 | -0.257 | -0.052 | 0.052 | -2.951 | -0.022 | 3.17E-03 | 18404 | -0.013 | -0.241  | 0.214  | 0.116 | -0.114 | -0.001 | 9.09E-01 | 18727 |
| 112 | Cerebellum_10_R     | -0.083 | -0.190 | 0.024  | 0.055 | -1.514 | -0.011 | 1.30E-01 | 18404 | 0.101  | -0.136  | 0.337  | 0.121 | 0.832  | 0.006  | 4.05E-01 | 18727 |
| 113 | Vermis_1_2          | 0.047  | -0.020 | 0.114  | 0.034 | 1.379  | 0.010  | 1.68E-01 | 18404 | 0.132  | -0.016  | 0.280  | 0.075 | 1.743  | 0.013  | 8.13E-02 | 18727 |
| 114 | Vermis_3            | 0.103  | -0.163 | 0.369  | 0.136 | 0.762  | 0.006  | 4.46E-01 | 18404 | 0.408  | -0.180  | 0.996  | 0.300 | 1.359  | 0.010  | 1.74E-01 | 18727 |
| 115 | Vermis_4_5          | 0.230  | -0.551 | 1.012  | 0.399 | 0.578  | 0.004  | 5.64E-01 | 18404 | 0.766  | -0.963  | 2.495  | 0.882 | 0.868  | 0.006  | 3.85E-01 | 18727 |
| 116 | Vermis_6            | 0.054  | -0.381 | 0.489  | 0.222 | 0.244  | 0.002  | 8.07E-01 | 18404 | 0.724  | -0.238  | 1.687  | 0.491 | 1.475  | 0.011  | 1.40E-01 | 18727 |
| 117 | Vermis_7            | -0.057 | -0.303 | 0.189  | 0.125 | -0.454 | -0.003 | 6.50E-01 | 18404 | 0.430  | -0.114  | 0.974  | 0.277 | 1.551  | 0.011  | 1.21E-01 | 18727 |
| 118 | Vermis_8            | 0.049  | -0.355 | 0.453  | 0.206 | 0.238  | 0.002  | 8.12E-01 | 18404 | 1.074  | 0.179   | 1.968  | 0.456 | 2.353  | 0.017  | 1.86E-02 | 18727 |
| 119 | Vermis_9            | -0.006 | -0.333 | 0.322  | 0.167 | -0.034 | 0.000  | 9.73E-01 | 18404 | 0.369  | -0.356  | 1.094  | 0.370 | 0.997  | 0.007  | 3.19E-01 | 18727 |
| 120 | Vermis_10           | 0.007  | -0.084 | 0.098  | 0.047 | 0.149  | 0.001  | 8.81E-01 | 18404 | 0.191  | -0.011  | 0.393  | 0.103 | 1.853  | 0.014  | 6.39E-02 | 18727 |
| 121 | ThaL_AV_L           | 0.015  | -0.022 | 0.052  | 0.019 | 0.809  | 0.006  | 4.18E-01 | 18404 | -0.029 | -0.110  | 0.052  | 0.041 | -0.698 | -0.005 | 4.85E-01 | 18727 |
| 122 | ThaL_AV_R           | 0.056  | 0.004  | 0.108  | 0.027 | 2.107  | 0.016  | 3.51E-02 | 18404 | -0.063 | -0.179  | 0.052  | 0.059 | -1.073 | -0.008 | 2.83E-01 | 18727 |
| 123 | ThaL_LP_L           | -0.007 | -0.048 | 0.033  | 0.021 | -0.345 | -0.003 | 7.30E-01 | 18404 | -0.111 | -0.201  | -0.021 | 0.046 | -2.420 | -0.018 | 1.55E-02 | 18727 |
| 124 | ThaL_LP_R           | 0.017  | -0.035 | 0.070  | 0.027 | 0.648  | 0.005  | 5.17E-01 | 18404 | -0.109 | -0.226  | 0.008  | 0.060 | -1.824 | -0.013 | 6.82E-02 | 18727 |
| 125 | ThaL_VA_L           | 0.015  | -0.028 | 0.059  | 0.022 | 0.694  | 0.005  | 4.88E-01 | 18404 | -0.020 | -0.116  | 0.075  | 0.049 | -0.419 | -0.003 | 6.75E-01 | 18727 |
| 126 | ThaL_VA_R           | 0.028  | -0.025 | 0.082  | 0.027 | 1.045  | 0.008  | 2.96E-01 | 18404 | -0.023 | -0.140  | 0.095  | 0.060 | -0.378 | -0.003 | 7.05E-01 | 18727 |
| 127 | ThaL_VL_L           | -0.018 | -0.141 | 0.106  | 0.063 | -0.280 | -0.002 | 7.80E-01 | 18404 | -0.317 | -0.589  | -0.045 | 0.139 | -2.281 | -0.017 | 2.25E-02 | 18727 |
| 128 | ThaL_VL_R           | 0.058  | -0.106 | 0.221  | 0.083 | 0.692  | 0.005  | 4.89E-01 | 18404 | -0.469 | -0.830  | -0.107 | 0.185 | -2.539 | -0.019 | 1.11E-02 | 18727 |
| 129 | ThaL_VPL_L          | -0.084 | -0.231 | 0.062  | 0.075 | -1.125 | -0.008 | 2.61E-01 | 18404 | -0.252 | -0.577  | 0.072  | 0.165 | -1.524 | -0.011 | 1.27E-01 | 18727 |

|     |            |        |        |        |       |        |        |          |       |        |        |        |       |        |        |          |       |
|-----|------------|--------|--------|--------|-------|--------|--------|----------|-------|--------|--------|--------|-------|--------|--------|----------|-------|
| 130 | Thal_VPL_R | -0.061 | -0.215 | 0.093  | 0.079 | -0.775 | -0.006 | 4.39E-01 | 18404 | -0.357 | -0.698 | -0.016 | 0.174 | -2.053 | -0.015 | 4.01E-02 | 18727 |
| 131 | Thal_IL_L  | -0.001 | -0.064 | 0.063  | 0.032 | -0.019 | 0.000  | 9.84E-01 | 18404 | -0.094 | -0.235 | 0.046  | 0.072 | -1.318 | -0.010 | 1.87E-01 | 18727 |
| 132 | Thal_IL_R  | 0.027  | -0.045 | 0.099  | 0.037 | 0.734  | 0.005  | 4.63E-01 | 18404 | -0.131 | -0.291 | 0.028  | 0.081 | -1.619 | -0.012 | 1.06E-01 | 18727 |
| 133 | Thal_Re_L  | 0.000  | 0.000  | 0.000  | 0.000 | 1.330  | 0.010  | 1.83E-01 | 18404 | 0.000  | -0.001 | 0.000  | 0.000 | -0.980 | -0.007 | 3.27E-01 | 18727 |
| 134 | Thal_Re_R  | 0.002  | 0.000  | 0.004  | 0.001 | 1.826  | 0.013  | 6.79E-02 | 18404 | -0.004 | -0.009 | 0.001  | 0.002 | -1.584 | -0.012 | 1.13E-01 | 18727 |
| 135 | Thal_MDm_L | 0.087  | -0.383 | 0.556  | 0.240 | 0.362  | 0.003  | 7.18E-01 | 18404 | -0.933 | -1.972 | 0.107  | 0.530 | -1.759 | -0.013 | 7.86E-02 | 18727 |
| 136 | Thal_MDm_R | 0.251  | -0.295 | 0.796  | 0.278 | 0.901  | 0.007  | 3.67E-01 | 18404 | -0.910 | -2.118 | 0.298  | 0.616 | -1.476 | -0.011 | 1.40E-01 | 18727 |
| 137 | Thal_MDI_L | 0.003  | -0.078 | 0.084  | 0.041 | 0.067  | 0.000  | 9.46E-01 | 18404 | -0.218 | -0.398 | -0.038 | 0.092 | -2.370 | -0.017 | 1.78E-02 | 18727 |
| 138 | Thal_MDI_R | 0.048  | -0.044 | 0.140  | 0.047 | 1.017  | 0.008  | 3.09E-01 | 18404 | -0.191 | -0.395 | 0.014  | 0.104 | -1.828 | -0.013 | 6.76E-02 | 18727 |
| 139 | Thal_LGN_L | 0.001  | -0.012 | 0.013  | 0.006 | 0.113  | 0.001  | 9.10E-01 | 18404 | -0.019 | -0.047 | 0.008  | 0.014 | -1.394 | -0.010 | 1.63E-01 | 18727 |
| 140 | Thal_LGN_R | 0.000  | -0.026 | 0.026  | 0.013 | -0.003 | 0.000  | 9.98E-01 | 18404 | -0.045 | -0.103 | 0.014  | 0.030 | -1.503 | -0.011 | 1.33E-01 | 18727 |
| 141 | Thal_MGN_L | -0.020 | -0.043 | 0.002  | 0.011 | -1.823 | -0.013 | 6.83E-02 | 18404 | -0.037 | -0.086 | 0.011  | 0.025 | -1.500 | -0.011 | 1.34E-01 | 18727 |
| 142 | Thal_MGN_R | -0.011 | -0.035 | 0.013  | 0.012 | -0.916 | -0.007 | 3.60E-01 | 18404 | -0.045 | -0.098 | 0.008  | 0.027 | -1.667 | -0.012 | 9.55E-02 | 18727 |
| 143 | Thal_PuA_L | -0.015 | -0.041 | 0.011  | 0.013 | -1.137 | -0.008 | 2.55E-01 | 18404 | -0.043 | -0.101 | 0.015  | 0.029 | -1.465 | -0.011 | 1.43E-01 | 18727 |
| 144 | Thal_PuA_R | -0.021 | -0.075 | 0.033  | 0.028 | -0.752 | -0.006 | 4.52E-01 | 18404 | -0.099 | -0.219 | 0.020  | 0.061 | -1.625 | -0.012 | 1.04E-01 | 18727 |
| 145 | Thal_PuM_L | -0.103 | -0.620 | 0.413  | 0.264 | -0.392 | -0.003 | 6.95E-01 | 18404 | -0.862 | -2.006 | 0.282  | 0.583 | -1.477 | -0.011 | 1.40E-01 | 18727 |
| 146 | Thal_PuM_R | -0.107 | -0.751 | 0.537  | 0.328 | -0.326 | -0.002 | 7.44E-01 | 18404 | -1.210 | -2.635 | 0.215  | 0.727 | -1.664 | -0.012 | 9.61E-02 | 18727 |
| 147 | Thal_PuL_L | -0.019 | -0.113 | 0.075  | 0.048 | -0.399 | -0.003 | 6.90E-01 | 18404 | -0.162 | -0.371 | 0.046  | 0.106 | -1.526 | -0.011 | 1.27E-01 | 18727 |
| 148 | Thal_PuL_R | -0.021 | -0.170 | 0.129  | 0.076 | -0.269 | -0.002 | 7.88E-01 | 18404 | -0.276 | -0.608 | 0.056  | 0.169 | -1.628 | -0.012 | 1.03E-01 | 18727 |
| 149 | Thal_PuL_L | -0.008 | -0.033 | 0.018  | 0.013 | -0.603 | -0.004 | 5.47E-01 | 18404 | -0.069 | -0.125 | -0.012 | 0.029 | -2.366 | -0.017 | 1.80E-02 | 18727 |
| 150 | Thal_PuL_R | -0.006 | -0.040 | 0.028  | 0.017 | -0.345 | -0.003 | 7.30E-01 | 18404 | -0.073 | -0.148 | 0.002  | 0.038 | -1.908 | -0.014 | 5.64E-02 | 18727 |
| 151 | ACC_sub_L  | -0.313 | -0.609 | -0.017 | 0.151 | -2.072 | -0.015 | 3.82E-02 | 18404 | 0.091  | -0.564 | 0.745  | 0.334 | 0.272  | 0.002  | 7.86E-01 | 18727 |
| 152 | ACC_sub_R  | -0.248 | -0.524 | 0.029  | 0.141 | -1.755 | -0.013 | 7.92E-02 | 18404 | 0.157  | -0.454 | 0.769  | 0.312 | 0.504  | 0.004  | 6.14E-01 | 18727 |
| 153 | ACC_pre_L  | -0.495 | -1.253 | 0.264  | 0.387 | -1.278 | -0.009 | 2.01E-01 | 18404 | 0.742  | -0.936 | 2.421  | 0.856 | 0.867  | 0.006  | 3.86E-01 | 18727 |
| 154 | ACC_pre_R  | -0.412 | -1.142 | 0.319  | 0.373 | -1.104 | -0.008 | 2.70E-01 | 18404 | 0.870  | -0.747 | 2.486  | 0.825 | 1.055  | 0.008  | 2.92E-01 | 18727 |
| 155 | ACC_sup_L  | 0.378  | -0.447 | 1.202  | 0.421 | 0.897  | 0.007  | 3.70E-01 | 18404 | -0.034 | -1.858 | 1.790  | 0.931 | -0.036 | 0.000  | 9.71E-01 | 18727 |
| 156 | ACC_sup_R  | -0.077 | -0.931 | 0.776  | 0.436 | -0.178 | -0.001 | 8.59E-01 | 18404 | 0.741  | -1.147 | 2.630  | 0.964 | 0.769  | 0.006  | 4.42E-01 | 18727 |
| 157 | N_Acc_L    | -0.147 | -0.395 | 0.102  | 0.127 | -1.158 | -0.009 | 2.47E-01 | 18404 | 0.175  | -0.374 | 0.724  | 0.280 | 0.625  | 0.005  | 5.32E-01 | 18727 |
| 158 | N_Acc_R    | -0.048 | -0.262 | 0.167  | 0.110 | -0.435 | -0.003 | 6.64E-01 | 18404 | 0.026  | -0.449 | 0.501  | 0.242 | 0.109  | 0.001  | 9.14E-01 | 18727 |
| 159 | VTA_L      | 0.004  | -0.004 | 0.013  | 0.004 | 1.006  | 0.007  | 3.14E-01 | 18404 | -0.008 | -0.027 | 0.011  | 0.010 | -0.813 | -0.006 | 4.16E-01 | 18727 |
| 160 | VTA_R      | 0.002  | -0.006 | 0.010  | 0.004 | 0.456  | 0.003  | 6.48E-01 | 18404 | -0.007 | -0.024 | 0.010  | 0.009 | -0.798 | -0.006 | 4.25E-01 | 18727 |
| 161 | SN_pc_L    | -0.003 | -0.017 | 0.011  | 0.007 | -0.478 | -0.004 | 6.33E-01 | 18404 | -0.030 | -0.061 | 0.001  | 0.016 | -1.897 | -0.014 | 5.78E-02 | 18727 |
| 162 | SN_pc_R    | -0.002 | -0.020 | 0.016  | 0.009 | -0.218 | -0.002 | 8.28E-01 | 18404 | -0.033 | -0.074 | 0.007  | 0.021 | -1.606 | -0.012 | 1.08E-01 | 18727 |
| 163 | SN_pr_L    | -0.006 | -0.025 | 0.014  | 0.010 | -0.570 | -0.004 | 5.69E-01 | 18404 | -0.066 | -0.108 | -0.024 | 0.021 | -3.090 | -0.023 | 2.00E-03 | 18727 |
| 164 | SN_pr_R    | -0.008 | -0.030 | 0.013  | 0.011 | -0.760 | -0.006 | 4.47E-01 | 18404 | -0.045 | -0.093 | 0.002  | 0.024 | -1.878 | -0.014 | 6.04E-02 | 18727 |
| 165 | Red_N_L    | 0.017  | -0.006 | 0.041  | 0.012 | 1.443  | 0.011  | 1.49E-01 | 18404 | -0.035 | -0.087 | 0.017  | 0.027 | -1.333 | -0.010 | 1.83E-01 | 18727 |
| 166 | Red_N_R    | 0.015  | -0.011 | 0.041  | 0.013 | 1.155  | 0.009  | 2.48E-01 | 18404 | -0.012 | -0.069 | 0.044  | 0.029 | -0.424 | -0.003 | 6.71E-01 | 18727 |
| 167 | LC_L       | 0.007  | -0.002 | 0.016  | 0.004 | 1.522  | 0.011  | 1.28E-01 | 18404 | 0.021  | 0.002  | 0.040  | 0.010 | 2.112  | 0.015  | 3.47E-02 | 18727 |
| 168 | LC_R       | 0.005  | -0.005 | 0.014  | 0.005 | 0.970  | 0.007  | 3.32E-01 | 18404 | 0.021  | 0.000  | 0.042  | 0.011 | 1.939  | 0.014  | 5.25E-02 | 18727 |
| 169 | Raphe_D    | 0.017  | -0.017 | 0.051  | 0.017 | 0.960  | 0.007  | 3.37E-01 | 18404 | -0.011 | -0.086 | 0.065  | 0.038 | -0.275 | -0.002 | 7.84E-01 | 18727 |
| 170 | Raphe_M    | 0.006  | -0.004 | 0.017  | 0.005 | 1.215  | 0.009  | 2.25E-01 | 18404 | 0.015  | -0.008 | 0.038  | 0.012 | 1.280  | 0.009  | 2.01E-01 | 18727 |

| Fresh fruit intake |                 |         |          |         |        |        |        |          |       | Beef intake |          |         |         |        |        |          |       |
|--------------------|-----------------|---------|----------|---------|--------|--------|--------|----------|-------|-------------|----------|---------|---------|--------|--------|----------|-------|
| Number             | AAL 3 region    | beta    | 95%CI_l  | 95%CI_h | se     | t      | r      | p        | df.e  | beta        | 95%CI_l  | 95%CI_h | se      | t      | r      | p        | df.e  |
| 0                  | Total brain     | -27.850 | -146.381 | 90.681  | 60.472 | -0.461 | -0.003 | 6.45E-01 | 18540 | -280.805    | -478.983 | -82.627 | 101.107 | -2.777 | -0.020 | 5.49E-03 | 18702 |
| 1                  | Precentral_L    | -0.341  | -4.516   | 3.834   | 2.130  | -0.160 | -0.001 | 8.73E-01 | 18540 | -2.654      | -9.636   | 4.328   | 3.562   | -0.745 | -0.005 | 4.56E-01 | 18702 |
| 2                  | Precentral_R    | 1.090   | -2.737   | 4.917   | 1.952  | 0.558  | 0.004  | 5.77E-01 | 18540 | -4.637      | -11.033  | 1.759   | 3.263   | -1.421 | -0.010 | 1.55E-01 | 18702 |
| 3                  | Frontal_Sup_2_L | -0.380  | -4.788   | 4.028   | 2.249  | -0.169 | -0.001 | 8.66E-01 | 18540 | -10.652     | -18.025  | -3.279  | 3.762   | -2.832 | -0.021 | 4.63E-03 | 18702 |
| 4                  | Frontal_Sup_2_R | -1.798  | -6.658   | 3.062   | 2.479  | -0.725 | -0.005 | 4.68E-01 | 18540 | -8.667      | -16.793  | -0.542  | 4.145   | -2.091 | -0.015 | 3.66E-02 | 18702 |
| 5                  | Frontal_Mid_2_L | -2.141  | -6.771   | 2.489   | 2.362  | -0.906 | -0.007 | 3.65E-01 | 18540 | -6.598      | -14.338  | 1.142   | 3.949   | -1.671 | -0.012 | 9.48E-02 | 18702 |



|    |                      |        |        |        |       |        |        |          |       |        |         |        |       |        |        |          |       |
|----|----------------------|--------|--------|--------|-------|--------|--------|----------|-------|--------|---------|--------|-------|--------|--------|----------|-------|
| 6  | Frontal_Mid_2_R      | -2.790 | -8.024 | 2.444  | 2.670 | -1.045 | -0.008 | 2.96E-01 | 18540 | -8.915 | -17.672 | -0.158 | 4.468 | -1.996 | -0.015 | 4.60E-02 | 18702 |
| 7  | Frontal_Inf_Oper_L   | 0.002  | -1.365 | 1.369  | 0.698 | 0.003  | 0.000  | 9.97E-01 | 18540 | -3.395 | -5.682  | -1.109 | 1.167 | -2.911 | -0.021 | 3.61E-03 | 18702 |
| 8  | Frontal_Inf_Oper_R   | -0.079 | -1.792 | 1.635  | 0.874 | -0.090 | -0.001 | 9.28E-01 | 18540 | -4.401 | -7.268  | -1.533 | 1.463 | -3.008 | -0.022 | 2.63E-03 | 18702 |
| 9  | Frontal_Inf_Tri_L    | -0.762 | -3.665 | 2.141  | 1.481 | -0.514 | -0.004 | 6.07E-01 | 18540 | -5.461 | -10.318 | -0.603 | 2.478 | -2.204 | -0.016 | 2.76E-02 | 18702 |
| 10 | Frontal_Inf_Tri_R    | -0.545 | -2.825 | 1.736  | 1.164 | -0.468 | -0.003 | 6.40E-01 | 18540 | -5.326 | -9.140  | -1.512 | 1.946 | -2.737 | -0.020 | 6.20E-03 | 18702 |
| 11 | Frontal_Inf_Orb_2_L  | -0.542 | -1.409 | 0.326  | 0.443 | -1.224 | -0.009 | 2.21E-01 | 18540 | -1.705 | -3.157  | -0.252 | 0.741 | -2.300 | -0.017 | 2.14E-02 | 18702 |
| 12 | Frontal_Inf_Orb_2_R  | 0.124  | -0.783 | 1.032  | 0.463 | 0.269  | 0.002  | 7.88E-01 | 18540 | -3.002 | -4.521  | -1.484 | 0.775 | -3.875 | -0.028 | 1.07E-04 | 18702 |
| 13 | Rolandic_Oper_L      | -1.521 | -2.835 | -0.208 | 0.670 | -2.271 | -0.017 | 2.32E-02 | 18540 | -0.828 | -3.024  | 1.369  | 1.121 | -0.739 | -0.005 | 4.60E-01 | 18702 |
| 14 | Rolandic_Oper_R      | -0.018 | -1.896 | 1.861  | 0.958 | -0.018 | 0.000  | 9.85E-01 | 18540 | -4.920 | -8.063  | -1.777 | 1.603 | -3.068 | -0.022 | 2.16E-03 | 18702 |
| 15 | Supp_Motor_Area_L    | 1.348  | -1.777 | 4.472  | 1.594 | 0.845  | 0.006  | 3.98E-01 | 18540 | -1.583 | -6.806  | 3.640  | 2.665 | -0.594 | -0.004 | 5.53E-01 | 18702 |
| 16 | Supp_Motor_Area_R    | 1.575  | -1.876 | 5.027  | 1.761 | 0.895  | 0.007  | 3.71E-01 | 18540 | -1.443 | -7.214  | 4.327  | 2.944 | -0.490 | -0.004 | 6.24E-01 | 18702 |
| 17 | Olfactory_L          | -0.342 | -0.805 | 0.122  | 0.237 | -1.445 | -0.011 | 1.48E-01 | 18540 | -0.395 | -1.171  | 0.381  | 0.396 | -0.997 | -0.007 | 3.19E-01 | 18702 |
| 18 | Olfactory_R          | -0.370 | -0.835 | 0.095  | 0.237 | -1.561 | -0.011 | 1.19E-01 | 18540 | -0.436 | -1.214  | 0.342  | 0.397 | -1.098 | -0.008 | 2.72E-01 | 18702 |
| 19 | Frontal_Sup_Medial_L | 0.355  | -2.572 | 3.282  | 1.493 | 0.238  | 0.002  | 8.12E-01 | 18540 | -6.769 | -11.660 | -1.877 | 2.496 | -2.712 | -0.020 | 6.69E-03 | 18702 |
| 20 | Frontal_Sup_Medial_R | 0.194  | -1.937 | 2.324  | 1.087 | 0.178  | 0.001  | 8.59E-01 | 18540 | -6.187 | -9.747  | -2.627 | 1.816 | -3.407 | -0.025 | 6.59E-04 | 18702 |
| 21 | Frontal_Med_Orb_L    | -0.081 | -1.174 | 1.012  | 0.558 | -0.145 | -0.001 | 8.84E-01 | 18540 | -2.294 | -4.123  | -0.466 | 0.933 | -2.460 | -0.018 | 1.39E-02 | 18702 |
| 22 | Frontal_Med_Orb_R    | 0.267  | -1.076 | 1.609  | 0.685 | 0.389  | 0.003  | 6.97E-01 | 18540 | -2.319 | -4.566  | -0.072 | 1.146 | -2.023 | -0.015 | 4.31E-02 | 18702 |
| 23 | Rectus_L             | -0.099 | -1.230 | 1.031  | 0.577 | -0.172 | -0.001 | 8.63E-01 | 18540 | -1.790 | -3.682  | 0.102  | 0.965 | -1.855 | -0.014 | 6.37E-02 | 18702 |
| 24 | Rectus_R             | -0.140 | -1.186 | 0.906  | 0.534 | -0.262 | -0.002 | 7.93E-01 | 18540 | -2.066 | -3.816  | -0.316 | 0.893 | -2.314 | -0.017 | 2.07E-02 | 18702 |
| 25 | OFCmed_L             | -0.212 | -0.867 | 0.444  | 0.334 | -0.633 | -0.005 | 5.27E-01 | 18540 | -1.229 | -2.326  | -0.133 | 0.560 | -2.197 | -0.016 | 2.80E-02 | 18702 |
| 26 | OFCmed_R             | -0.383 | -1.147 | 0.380  | 0.390 | -0.984 | -0.007 | 3.25E-01 | 18540 | -1.545 | -2.823  | -0.267 | 0.652 | -2.370 | -0.017 | 1.78E-02 | 18702 |
| 27 | OFCant_L             | -0.525 | -1.283 | 0.233  | 0.387 | -1.358 | -0.010 | 1.74E-01 | 18540 | -1.241 | -2.509  | 0.028  | 0.647 | -1.917 | -0.014 | 5.52E-02 | 18702 |
| 28 | OFCant_R             | -1.061 | -2.062 | -0.060 | 0.511 | -2.077 | -0.015 | 3.78E-02 | 18540 | -1.859 | -3.534  | -0.184 | 0.855 | -2.175 | -0.016 | 2.96E-02 | 18702 |
| 29 | OFCpost_L            | -0.548 | -1.496 | 0.401  | 0.484 | -1.132 | -0.008 | 2.58E-01 | 18540 | -1.680 | -3.269  | -0.092 | 0.810 | -2.074 | -0.015 | 3.81E-02 | 18702 |
| 30 | OFCpost_R            | -0.499 | -1.376 | 0.378  | 0.447 | -1.116 | -0.008 | 2.65E-01 | 18540 | -2.236 | -3.704  | -0.769 | 0.749 | -2.987 | -0.022 | 2.82E-03 | 18702 |
| 31 | OFClat_L             | -0.325 | -0.645 | -0.005 | 0.163 | -1.994 | -0.015 | 4.62E-02 | 18540 | -0.865 | -1.400  | -0.329 | 0.273 | -3.163 | -0.023 | 1.56E-03 | 18702 |
| 32 | OFClat_R             | -0.100 | -0.371 | 0.170  | 0.138 | -0.725 | -0.005 | 4.68E-01 | 18540 | -0.989 | -1.441  | -0.537 | 0.231 | -4.285 | -0.031 | 1.83E-05 | 18702 |
| 33 | Insula_L             | -2.680 | -5.611 | 0.252  | 1.496 | -1.792 | -0.013 | 7.32E-02 | 18540 | -5.023 | -9.933  | -0.114 | 2.505 | -2.006 | -0.015 | 4.49E-02 | 18702 |
| 34 | Insula_R             | -2.306 | -5.163 | 0.551  | 1.458 | -1.582 | -0.012 | 1.14E-01 | 18540 | -8.027 | -12.810 | -3.244 | 2.440 | -3.290 | -0.024 | 1.00E-03 | 18702 |
| 37 | Cingulate_Mid_L      | 1.603  | -0.879 | 4.084  | 1.266 | 1.266  | 0.009  | 2.06E-01 | 18540 | -5.319 | -9.466  | -1.172 | 2.116 | -2.514 | -0.018 | 1.20E-02 | 18702 |
| 38 | Cingulate_Mid_R      | 0.766  | -1.879 | 3.411  | 1.350 | 0.568  | 0.004  | 5.70E-01 | 18540 | -5.196 | -9.617  | -0.774 | 2.256 | -2.303 | -0.017 | 2.13E-02 | 18702 |
| 39 | Cingulate_Post_L     | 0.084  | -0.675 | 0.843  | 0.387 | 0.217  | 0.002  | 8.28E-01 | 18540 | -1.530 | -2.798  | -0.262 | 0.647 | -2.366 | -0.017 | 1.80E-02 | 18702 |
| 40 | Cingulate_Post_R     | -0.138 | -0.559 | 0.283  | 0.215 | -0.642 | -0.005 | 5.21E-01 | 18540 | -0.613 | -1.316  | 0.090  | 0.359 | -1.708 | -0.012 | 8.76E-02 | 18702 |
| 41 | Hippocampus_L        | -0.028 | -1.255 | 1.199  | 0.626 | -0.045 | 0.000  | 9.64E-01 | 18540 | -1.978 | -4.030  | 0.073  | 1.047 | -1.890 | -0.014 | 5.88E-02 | 18702 |
| 42 | Hippocampus_R        | 0.107  | -1.164 | 1.379  | 0.649 | 0.166  | 0.001  | 8.68E-01 | 18540 | -2.339 | -4.466  | -0.212 | 1.085 | -2.155 | -0.016 | 3.11E-02 | 18702 |
| 43 | ParaHippocampaL      | 0.272  | -0.818 | 1.362  | 0.556 | 0.489  | 0.004  | 6.25E-01 | 18540 | -1.304 | -3.126  | 0.519  | 0.930 | -1.402 | -0.010 | 1.61E-01 | 18702 |
| 44 | ParaHippocampaR      | -0.410 | -1.784 | 0.965  | 0.701 | -0.584 | -0.004 | 5.59E-01 | 18540 | -2.234 | -4.533  | 0.065  | 1.173 | -1.905 | -0.014 | 5.68E-02 | 18702 |
| 45 | Amygdala_L           | 0.017  | -0.406 | 0.441  | 0.216 | 0.080  | 0.001  | 9.36E-01 | 18540 | -0.633 | -1.342  | 0.076  | 0.362 | -1.751 | -0.013 | 8.00E-02 | 18702 |
| 46 | Amygdala_R           | -0.022 | -0.455 | 0.411  | 0.221 | -0.098 | -0.001 | 9.22E-01 | 18540 | -1.127 | -1.852  | -0.403 | 0.370 | -3.051 | -0.022 | 2.28E-03 | 18702 |
| 47 | Calcarine_L          | -0.265 | -4.311 | 3.782  | 2.064 | -0.128 | -0.001 | 8.98E-01 | 18540 | 4.125  | -2.637  | 10.888 | 3.450 | 1.196  | 0.009  | 2.32E-01 | 18702 |
| 48 | Calcarine_R          | -0.471 | -3.850 | 2.908  | 1.724 | -0.273 | -0.002 | 7.85E-01 | 18540 | 3.888  | -1.761  | 9.538  | 2.882 | 1.349  | 0.010  | 1.77E-01 | 18702 |
| 49 | Cuneus_L             | 2.271  | -0.266 | 4.808  | 1.294 | 1.755  | 0.013  | 7.93E-02 | 18540 | -0.178 | -4.418  | 4.062  | 2.163 | -0.082 | -0.001 | 9.34E-01 | 18702 |
| 50 | Cuneus_R             | -0.648 | -2.587 | 1.291  | 0.989 | -0.655 | -0.005 | 5.12E-01 | 18540 | 0.434  | -2.810  | 3.677  | 1.655 | 0.262  | 0.002  | 7.93E-01 | 18702 |
| 51 | Lingual_L            | -0.741 | -3.174 | 1.691  | 1.241 | -0.597 | -0.004 | 5.50E-01 | 18540 | 0.381  | -3.685  | 4.446  | 2.074 | 0.183  | 0.001  | 8.54E-01 | 18702 |
| 52 | Lingual_R            | -0.992 | -3.540 | 1.556  | 1.300 | -0.763 | -0.006 | 4.45E-01 | 18540 | 0.756  | -3.502  | 5.014  | 2.172 | 0.348  | 0.003  | 7.28E-01 | 18702 |
| 53 | Occipital_Sup_L      | 0.591  | -1.080 | 2.262  | 0.853 | 0.693  | 0.005  | 4.88E-01 | 18540 | -3.812 | -6.606  | -1.018 | 1.425 | -2.674 | -0.020 | 7.50E-03 | 18702 |
| 54 | Occipital_Sup_R      | -0.187 | -1.999 | 1.625  | 0.924 | -0.202 | -0.001 | 8.40E-01 | 18540 | -3.070 | -6.097  | -0.043 | 1.544 | -1.988 | -0.015 | 4.68E-02 | 18702 |
| 55 | Occipital_Mid_L      | -1.141 | -5.056 | 2.773  | 1.997 | -0.571 | -0.004 | 5.68E-01 | 18540 | -4.205 | -10.754 | 2.345  | 3.341 | -1.258 | -0.009 | 2.08E-01 | 18702 |
| 56 | Occipital_Mid_R      | 0.382  | -2.344 | 3.108  | 1.391 | 0.275  | 0.002  | 7.84E-01 | 18540 | -3.744 | -8.301  | 0.812  | 2.325 | -1.611 | -0.012 | 1.07E-01 | 18702 |

|     |                      |        |        |        |       |        |        |          |       |         |         |        |       |        |        |          |       |
|-----|----------------------|--------|--------|--------|-------|--------|--------|----------|-------|---------|---------|--------|-------|--------|--------|----------|-------|
| 57  | Occipital_Inf_L      | -1.529 | -2.829 | -0.228 | 0.664 | -2.304 | -0.017 | 2.13E-02 | 18540 | 0.800   | -1.376  | 2.975  | 1.110 | 0.720  | 0.005  | 4.71E-01 | 18702 |
| 58  | Occipital_Inf_R      | -1.540 | -3.043 | -0.036 | 0.767 | -2.008 | -0.015 | 4.47E-02 | 18540 | 0.992   | -1.519  | 3.504  | 1.281 | 0.775  | 0.006  | 4.39E-01 | 18702 |
| 59  | Fusiform_L           | 0.632  | -2.212 | 3.476  | 1.451 | 0.436  | 0.003  | 6.63E-01 | 18540 | 2.343   | -2.416  | 7.102  | 2.428 | 0.965  | 0.007  | 3.35E-01 | 18702 |
| 60  | Fusiform_R           | 0.883  | -2.242 | 4.009  | 1.594 | 0.554  | 0.004  | 5.80E-01 | 18540 | -1.406  | -6.635  | 3.822  | 2.667 | -0.527 | -0.004 | 5.98E-01 | 18702 |
| 61  | Postcentral_L        | 7.158  | 2.878  | 11.438 | 2.184 | 3.278  | 0.024  | 1.05E-03 | 18540 | -2.173  | -9.329  | 4.983  | 3.651 | -0.595 | -0.004 | 5.52E-01 | 18702 |
| 62  | Postcentral_R        | 7.793  | 3.406  | 12.179 | 2.238 | 3.482  | 0.026  | 4.98E-04 | 18540 | -0.334  | -7.671  | 7.003  | 3.743 | -0.089 | -0.001 | 9.29E-01 | 18702 |
| 63  | Parietal_Sup_L       | -0.650 | -3.117 | 1.817  | 1.259 | -0.516 | -0.004 | 6.06E-01 | 18540 | -4.734  | -8.859  | -0.610 | 2.104 | -2.250 | -0.016 | 2.45E-02 | 18702 |
| 64  | Parietal_Sup_R       | 0.157  | -2.033 | 2.347  | 1.117 | 0.141  | 0.001  | 8.88E-01 | 18540 | -2.269  | -5.928  | 1.390  | 1.867 | -1.216 | -0.009 | 2.24E-01 | 18702 |
| 65  | Parietal_Inf_L       | 2.066  | -1.166 | 5.298  | 1.649 | 1.253  | 0.009  | 2.10E-01 | 18540 | -2.812  | -8.210  | 2.587  | 2.754 | -1.021 | -0.007 | 3.07E-01 | 18702 |
| 66  | Parietal_Inf_R       | 2.456  | 0.363  | 4.548  | 1.068 | 2.300  | 0.017  | 2.14E-02 | 18540 | -2.300  | -5.798  | 1.198  | 1.784 | -1.289 | -0.009 | 1.97E-01 | 18702 |
| 67  | SupraMarginal_L      | 1.201  | -0.693 | 3.094  | 0.966 | 1.243  | 0.009  | 2.14E-01 | 18540 | -3.785  | -6.949  | -0.622 | 1.614 | -2.345 | -0.017 | 1.90E-02 | 18702 |
| 68  | SupraMarginal_R      | 4.123  | 1.445  | 6.801  | 1.366 | 3.018  | 0.022  | 2.55E-03 | 18540 | -7.421  | -11.897 | -2.945 | 2.284 | -3.250 | -0.024 | 1.16E-03 | 18702 |
| 69  | Angular_L            | 0.291  | -1.570 | 2.152  | 0.949 | 0.306  | 0.002  | 7.59E-01 | 18540 | -0.298  | -3.407  | 2.811  | 1.586 | -0.188 | -0.001 | 8.51E-01 | 18702 |
| 70  | Angular_R            | 0.878  | -1.617 | 3.372  | 1.273 | 0.690  | 0.005  | 4.90E-01 | 18540 | -1.244  | -5.412  | 2.924  | 2.127 | -0.585 | -0.004 | 5.59E-01 | 18702 |
| 71  | Precuneus_L          | 3.558  | -0.971 | 8.087  | 2.311 | 1.540  | 0.011  | 1.24E-01 | 18540 | -3.911  | -11.485 | 3.664  | 3.864 | -1.012 | -0.007 | 3.12E-01 | 18702 |
| 72  | Precuneus_R          | -0.044 | -4.081 | 3.993  | 2.059 | -0.021 | 0.000  | 9.83E-01 | 18540 | -0.838  | -7.585  | 5.908  | 3.442 | -0.244 | -0.002 | 8.08E-01 | 18702 |
| 73  | Paracentral_Lobule_L | 2.093  | 0.018  | 4.169  | 1.059 | 1.977  | 0.015  | 4.80E-02 | 18540 | -1.015  | -4.485  | 2.456  | 1.771 | -0.573 | -0.004 | 5.67E-01 | 18702 |
| 74  | Paracentral_Lobule_R | 0.136  | -1.350 | 1.622  | 0.758 | 0.180  | 0.001  | 8.57E-01 | 18540 | -0.566  | -3.051  | 1.919  | 1.268 | -0.446 | -0.003 | 6.55E-01 | 18702 |
| 75  | Caudate_L            | -0.239 | -1.895 | 1.417  | 0.845 | -0.283 | -0.002 | 7.77E-01 | 18540 | -3.534  | -6.307  | -0.761 | 1.415 | -2.498 | -0.018 | 1.25E-02 | 18702 |
| 76  | Caudate_R            | -1.051 | -2.925 | 0.823  | 0.956 | -1.099 | -0.008 | 2.72E-01 | 18540 | -3.312  | -6.450  | -0.173 | 1.601 | -2.068 | -0.015 | 3.86E-02 | 18702 |
| 77  | Putamen_L            | -2.249 | -4.762 | 0.264  | 1.282 | -1.754 | -0.013 | 7.94E-02 | 18540 | -6.989  | -11.197 | -2.781 | 2.147 | -3.255 | -0.024 | 1.13E-03 | 18702 |
| 78  | Putamen_R            | -2.244 | -4.803 | 0.316  | 1.306 | -1.718 | -0.013 | 8.58E-02 | 18540 | -6.746  | -11.032 | -2.461 | 2.186 | -3.086 | -0.023 | 2.03E-03 | 18702 |
| 79  | Pallidum_L           | -0.128 | -0.352 | 0.096  | 0.114 | -1.122 | -0.008 | 2.62E-01 | 18540 | -0.647  | -1.021  | -0.273 | 0.191 | -3.389 | -0.025 | 7.02E-04 | 18702 |
| 80  | Pallidum_R           | -0.170 | -0.415 | 0.076  | 0.125 | -1.356 | -0.010 | 1.75E-01 | 18540 | -0.731  | -1.142  | -0.321 | 0.209 | -3.490 | -0.026 | 4.84E-04 | 18702 |
| 83  | Heschl_L             | -0.439 | -0.893 | 0.014  | 0.231 | -1.898 | -0.014 | 5.78E-02 | 18540 | -0.676  | -1.434  | 0.083  | 0.387 | -1.746 | -0.013 | 8.09E-02 | 18702 |
| 84  | Heschl_R             | -0.036 | -0.542 | 0.471  | 0.259 | -0.138 | -0.001 | 8.91E-01 | 18540 | -1.617  | -2.464  | -0.770 | 0.432 | -3.740 | -0.027 | 1.84E-04 | 18702 |
| 85  | Temporal_Sup_L       | -1.746 | -5.019 | 1.527  | 1.670 | -1.046 | -0.008 | 2.96E-01 | 18540 | -6.283  | -11.759 | -0.807 | 2.794 | -2.249 | -0.016 | 2.45E-02 | 18702 |
| 86  | Temporal_Sup_R       | 0.903  | -2.719 | 4.524  | 1.848 | 0.488  | 0.004  | 6.25E-01 | 18540 | -11.303 | -17.359 | -5.247 | 3.090 | -3.658 | -0.027 | 2.54E-04 | 18702 |
| 87  | Temporal_Pole_Sup_L  | -0.878 | -2.428 | 0.673  | 0.791 | -1.110 | -0.008 | 2.67E-01 | 18540 | -2.637  | -5.231  | -0.042 | 1.324 | -1.992 | -0.015 | 4.64E-02 | 18702 |
| 88  | Temporal_Pole_Sup_R  | -1.062 | -2.694 | 0.570  | 0.833 | -1.275 | -0.009 | 2.02E-01 | 18540 | -3.390  | -6.120  | -0.659 | 1.393 | -2.433 | -0.018 | 1.50E-02 | 18702 |
| 89  | Temporal_Mid_L       | -0.509 | -5.968 | 4.950  | 2.785 | -0.183 | -0.001 | 8.55E-01 | 18540 | -11.673 | -20.797 | -2.549 | 4.655 | -2.508 | -0.018 | 1.22E-02 | 18702 |
| 90  | Temporal_Mid_R       | -0.953 | -5.802 | 3.895  | 2.474 | -0.385 | -0.003 | 7.00E-01 | 18540 | -3.769  | -11.871 | 4.334  | 4.134 | -0.912 | -0.007 | 3.62E-01 | 18702 |
| 91  | Temporal_Pole_Mid_L  | -0.028 | -1.332 | 1.276  | 0.665 | -0.042 | 0.000  | 9.66E-01 | 18540 | 0.139   | -2.042  | 2.320  | 1.113 | 0.125  | 0.001  | 9.01E-01 | 18702 |
| 92  | Temporal_Pole_Mid_R  | -0.923 | -2.506 | 0.660  | 0.807 | -1.143 | -0.008 | 2.53E-01 | 18540 | -1.418  | -4.068  | 1.232  | 1.352 | -1.049 | -0.008 | 2.94E-01 | 18702 |
| 93  | Temporal_Inf_L       | -1.773 | -5.522 | 1.976  | 1.913 | -0.927 | -0.007 | 3.54E-01 | 18540 | -4.110  | -10.381 | 2.162  | 3.200 | -1.284 | -0.009 | 1.99E-01 | 18702 |
| 94  | Temporal_Inf_R       | -1.252 | -5.341 | 2.838  | 2.086 | -0.600 | -0.004 | 5.49E-01 | 18540 | -1.658  | -8.496  | 5.179  | 3.488 | -0.475 | -0.003 | 6.34E-01 | 18702 |
| 95  | Cerebellum_Crus1_L   | -0.431 | -4.887 | 4.025  | 2.273 | -0.190 | -0.001 | 8.49E-01 | 18540 | 0.983   | -6.468  | 8.435  | 3.802 | 0.259  | 0.002  | 7.96E-01 | 18702 |
| 96  | Cerebellum_Crus1_R   | -2.409 | -6.955 | 2.137  | 2.319 | -1.039 | -0.008 | 2.99E-01 | 18540 | -1.761  | -9.361  | 5.839  | 3.877 | -0.454 | -0.003 | 6.50E-01 | 18702 |
| 97  | Cerebellum_Crus2_L   | -2.610 | -6.144 | 0.924  | 1.803 | -1.447 | -0.011 | 1.48E-01 | 18540 | -3.869  | -9.780  | 2.043  | 3.016 | -1.283 | -0.009 | 2.00E-01 | 18702 |
| 98  | Cerebellum_Crus2_R   | -2.248 | -5.515 | 1.019  | 1.667 | -1.349 | -0.010 | 1.77E-01 | 18540 | -3.750  | -9.218  | 1.717  | 2.789 | -1.344 | -0.010 | 1.79E-01 | 18702 |
| 99  | Cerebellum_3_L       | -0.147 | -0.384 | 0.090  | 0.121 | -1.215 | -0.009 | 2.24E-01 | 18540 | 0.756   | 0.359   | 1.153  | 0.202 | 3.735  | 0.027  | 1.88E-04 | 18702 |
| 100 | Cerebellum_3_R       | -0.082 | -0.402 | 0.239  | 0.163 | -0.500 | -0.004 | 6.17E-01 | 18540 | 0.695   | 0.159   | 1.230  | 0.273 | 2.542  | 0.019  | 1.10E-02 | 18702 |
| 101 | Cerebellum_4_5_L     | -0.455 | -2.374 | 1.465  | 0.979 | -0.464 | -0.003 | 6.42E-01 | 18540 | 2.846   | -0.364  | 6.056  | 1.638 | 1.738  | 0.013  | 8.22E-02 | 18702 |
| 102 | Cerebellum_4_5_R     | 0.540  | -1.024 | 2.104  | 0.798 | 0.677  | 0.005  | 4.99E-01 | 18540 | 1.963   | -0.653  | 4.579  | 1.335 | 1.471  | 0.011  | 1.41E-01 | 18702 |
| 103 | Cerebellum_6_L       | 1.022  | -2.294 | 4.337  | 1.692 | 0.604  | 0.004  | 5.46E-01 | 18540 | 0.582   | -4.965  | 6.130  | 2.830 | 0.206  | 0.002  | 8.37E-01 | 18702 |
| 104 | Cerebellum_6_R       | 0.854  | -2.641 | 4.348  | 1.783 | 0.479  | 0.004  | 6.32E-01 | 18540 | -0.046  | -5.890  | 5.799  | 2.982 | -0.015 | 0.000  | 9.88E-01 | 18702 |
| 105 | Cerebellum_7b_L      | -0.956 | -2.036 | 0.124  | 0.551 | -1.735 | -0.013 | 8.27E-02 | 18540 | -1.338  | -3.144  | 0.468  | 0.921 | -1.453 | -0.011 | 1.46E-01 | 18702 |
| 106 | Cerebellum_7b_R      | -0.929 | -2.000 | 0.142  | 0.546 | -1.701 | -0.012 | 8.90E-02 | 18540 | -1.995  | -3.785  | -0.204 | 0.913 | -2.184 | -0.016 | 2.90E-02 | 18702 |
| 107 | Cerebellum_8_L       | -2.983 | -6.415 | 0.448  | 1.751 | -1.704 | -0.013 | 8.84E-02 | 18540 | -2.486  | -8.222  | 3.250  | 2.926 | -0.849 | -0.006 | 3.96E-01 | 18702 |

|     |                 |        |        |        |       |        |        |          |       |        |         |        |       |        |        |          |       |
|-----|-----------------|--------|--------|--------|-------|--------|--------|----------|-------|--------|---------|--------|-------|--------|--------|----------|-------|
| 108 | Cerebellum_8_R  | -5.079 | -9.544 | -0.614 | 2.278 | -2.230 | -0.016 | 2.58E-02 | 18540 | -7.227 | -14.693 | 0.239  | 3.809 | -1.897 | -0.014 | 5.78E-02 | 18702 |
| 109 | Cerebellum_9_L  | -2.067 | -4.007 | -0.127 | 0.990 | -2.088 | -0.015 | 3.68E-02 | 18540 | -0.035 | -3.280  | 3.209  | 1.655 | -0.021 | 0.000  | 9.83E-01 | 18702 |
| 110 | Cerebellum_9_R  | -2.316 | -4.223 | -0.408 | 0.973 | -2.379 | -0.017 | 1.74E-02 | 18540 | 0.576  | -2.613  | 3.765  | 1.627 | 0.354  | 0.003  | 7.23E-01 | 18702 |
| 111 | Cerebellum_10_L | 0.001  | -0.137 | 0.139  | 0.070 | 0.012  | 0.000  | 9.90E-01 | 18540 | 0.024  | -0.207  | 0.254  | 0.117 | 0.201  | 0.001  | 8.41E-01 | 18702 |
| 112 | Cerebellum_10_R | 0.061  | -0.082 | 0.204  | 0.073 | 0.833  | 0.006  | 4.05E-01 | 18540 | 0.156  | -0.083  | 0.395  | 0.122 | 1.277  | 0.009  | 2.02E-01 | 18702 |
| 113 | Vermis_1_2      | -0.098 | -0.188 | -0.009 | 0.046 | -2.158 | -0.016 | 3.09E-02 | 18540 | 0.202  | 0.052   | 0.352  | 0.076 | 2.647  | 0.019  | 8.12E-03 | 18702 |
| 114 | Vermis_3        | -0.415 | -0.770 | -0.060 | 0.181 | -2.290 | -0.017 | 2.20E-02 | 18540 | 0.622  | 0.028   | 1.217  | 0.303 | 2.051  | 0.015  | 4.02E-02 | 18702 |
| 115 | Vermis_4_5      | -0.753 | -1.798 | 0.292  | 0.533 | -1.412 | -0.010 | 1.58E-01 | 18540 | 0.976  | -0.773  | 2.725  | 0.892 | 1.094  | 0.008  | 2.74E-01 | 18702 |
| 116 | Vermis_6        | -0.280 | -0.862 | 0.302  | 0.297 | -0.944 | -0.007 | 3.45E-01 | 18540 | 0.319  | -0.654  | 1.293  | 0.497 | 0.643  | 0.005  | 5.20E-01 | 18702 |
| 117 | Vermis_7        | -0.239 | -0.568 | 0.090  | 0.168 | -1.425 | -0.010 | 1.54E-01 | 18540 | -0.191 | -0.742  | 0.359  | 0.281 | -0.682 | -0.005 | 4.95E-01 | 18702 |
| 118 | Vermis_8        | -0.174 | -0.715 | 0.367  | 0.276 | -0.631 | -0.005 | 5.28E-01 | 18540 | 0.001  | -0.903  | 0.905  | 0.461 | 0.002  | 0.000  | 9.98E-01 | 18702 |
| 119 | Vermis_9        | -0.288 | -0.727 | 0.150  | 0.224 | -1.290 | -0.009 | 1.97E-01 | 18540 | 0.178  | -0.555  | 0.911  | 0.374 | 0.476  | 0.003  | 6.34E-01 | 18702 |
| 120 | Vermis_10       | -0.143 | -0.266 | -0.021 | 0.062 | -2.301 | -0.017 | 2.14E-02 | 18540 | 0.244  | 0.040   | 0.448  | 0.104 | 2.343  | 0.017  | 1.92E-02 | 18702 |
| 121 | Tha_AV_L        | 0.019  | -0.030 | 0.068  | 0.025 | 0.747  | 0.005  | 4.55E-01 | 18540 | -0.065 | -0.147  | 0.017  | 0.042 | -1.557 | -0.011 | 1.20E-01 | 18702 |
| 122 | Tha_AV_R        | -0.032 | -0.102 | 0.038  | 0.036 | -0.890 | -0.007 | 3.74E-01 | 18540 | -0.049 | -0.166  | 0.068  | 0.060 | -0.819 | -0.006 | 4.13E-01 | 18702 |
| 123 | Tha_LP_L        | 0.015  | -0.040 | 0.069  | 0.028 | 0.527  | 0.004  | 5.99E-01 | 18540 | -0.085 | -0.176  | 0.006  | 0.046 | -1.841 | -0.013 | 6.56E-02 | 18702 |
| 124 | Tha_LP_R        | -0.025 | -0.096 | 0.045  | 0.036 | -0.707 | -0.005 | 4.79E-01 | 18540 | -0.078 | -0.196  | 0.040  | 0.060 | -1.296 | -0.009 | 1.95E-01 | 18702 |
| 125 | Tha_VA_L        | 0.018  | -0.040 | 0.076  | 0.030 | 0.613  | 0.004  | 5.40E-01 | 18540 | -0.050 | -0.147  | 0.047  | 0.049 | -1.012 | -0.007 | 3.12E-01 | 18702 |
| 126 | Tha_VA_R        | -0.007 | -0.078 | 0.064  | 0.036 | -0.195 | -0.001 | 8.46E-01 | 18540 | -0.015 | -0.134  | 0.104  | 0.061 | -0.245 | -0.002 | 8.07E-01 | 18702 |
| 127 | Tha_VL_L        | 0.056  | -0.108 | 0.221  | 0.084 | 0.673  | 0.005  | 5.01E-01 | 18540 | -0.257 | -0.532  | 0.018  | 0.140 | -1.830 | -0.013 | 6.72E-02 | 18702 |
| 128 | Tha_VL_R        | -0.050 | -0.269 | 0.169  | 0.112 | -0.448 | -0.003 | 6.54E-01 | 18540 | -0.270 | -0.636  | 0.096  | 0.187 | -1.448 | -0.011 | 1.48E-01 | 18702 |
| 129 | Tha_VPL_L       | -0.075 | -0.271 | 0.121  | 0.100 | -0.750 | -0.006 | 4.53E-01 | 18540 | -0.218 | -0.546  | 0.110  | 0.167 | -1.303 | -0.010 | 1.93E-01 | 18702 |
| 130 | Tha_VPL_R       | -0.050 | -0.256 | 0.156  | 0.105 | -0.474 | -0.003 | 6.36E-01 | 18540 | -0.397 | -0.741  | -0.052 | 0.176 | -2.257 | -0.016 | 2.40E-02 | 18702 |
| 131 | Tha_IL_L        | -0.019 | -0.104 | 0.066  | 0.043 | -0.436 | -0.003 | 6.63E-01 | 18540 | -0.224 | -0.365  | -0.082 | 0.072 | -3.095 | -0.023 | 1.97E-03 | 18702 |
| 132 | Tha_IL_R        | -0.034 | -0.130 | 0.062  | 0.049 | -0.691 | -0.005 | 4.89E-01 | 18540 | -0.254 | -0.415  | -0.093 | 0.082 | -3.097 | -0.023 | 1.96E-03 | 18702 |
| 133 | Tha_Re_L        | 0.000  | 0.000  | 0.000  | 0.000 | -0.253 | -0.002 | 8.00E-01 | 18540 | 0.000  | -0.001  | 0.001  | 0.000 | 0.337  | 0.002  | 7.36E-01 | 18702 |
| 134 | Tha_Re_R        | -0.002 | -0.004 | 0.001  | 0.001 | -1.102 | -0.008 | 2.71E-01 | 18540 | -0.001 | -0.006  | 0.004  | 0.002 | -0.519 | -0.004 | 6.03E-01 | 18702 |
| 135 | Tha_MDm_L       | -0.350 | -0.978 | 0.278  | 0.320 | -1.094 | -0.008 | 2.74E-01 | 18540 | -1.795 | -2.844  | -0.745 | 0.536 | -3.351 | -0.024 | 8.08E-04 | 18702 |
| 136 | Tha_MDm_R       | -0.510 | -1.240 | 0.220  | 0.372 | -1.370 | -0.010 | 1.71E-01 | 18540 | -1.871 | -3.091  | -0.650 | 0.623 | -3.004 | -0.022 | 2.66E-03 | 18702 |
| 137 | Tha_MDI_L       | -0.012 | -0.120 | 0.097  | 0.055 | -0.209 | -0.002 | 8.35E-01 | 18540 | -0.305 | -0.486  | -0.123 | 0.093 | -3.287 | -0.024 | 1.02E-03 | 18702 |
| 138 | Tha_MDI_R       | -0.053 | -0.177 | 0.070  | 0.063 | -0.847 | -0.006 | 3.97E-01 | 18540 | -0.310 | -0.517  | -0.103 | 0.105 | -2.942 | -0.022 | 3.27E-03 | 18702 |
| 139 | Tha_LGN_L       | -0.004 | -0.020 | 0.013  | 0.008 | -0.447 | -0.003 | 6.55E-01 | 18540 | -0.025 | -0.053  | 0.002  | 0.014 | -1.791 | -0.013 | 7.33E-02 | 18702 |
| 140 | Tha_LGN_R       | -0.019 | -0.054 | 0.016  | 0.018 | -1.049 | -0.008 | 2.94E-01 | 18540 | -0.070 | -0.128  | -0.011 | 0.030 | -2.328 | -0.017 | 1.99E-02 | 18702 |
| 141 | Tha_MGN_L       | -0.025 | -0.055 | 0.004  | 0.015 | -1.688 | -0.012 | 9.15E-02 | 18540 | -0.072 | -0.121  | -0.023 | 0.025 | -2.860 | -0.021 | 4.24E-03 | 18702 |
| 142 | Tha_MGN_R       | -0.024 | -0.056 | 0.008  | 0.016 | -1.465 | -0.011 | 1.43E-01 | 18540 | -0.100 | -0.154  | -0.047 | 0.027 | -3.664 | -0.027 | 2.49E-04 | 18702 |
| 143 | Tha_PuA_L       | -0.028 | -0.063 | 0.007  | 0.018 | -1.567 | -0.012 | 1.17E-01 | 18540 | -0.085 | -0.144  | -0.027 | 0.030 | -2.880 | -0.021 | 3.98E-03 | 18702 |
| 144 | Tha_PuA_R       | -0.043 | -0.115 | 0.029  | 0.037 | -1.163 | -0.009 | 2.45E-01 | 18540 | -0.225 | -0.346  | -0.105 | 0.062 | -3.654 | -0.027 | 2.59E-04 | 18702 |
| 145 | Tha_PuM_L       | -0.514 | -1.205 | 0.177  | 0.353 | -1.457 | -0.011 | 1.45E-01 | 18540 | -1.667 | -2.823  | -0.511 | 0.590 | -2.827 | -0.021 | 4.70E-03 | 18702 |
| 146 | Tha_PuM_R       | -0.377 | -1.238 | 0.485  | 0.440 | -0.857 | -0.006 | 3.92E-01 | 18540 | -2.305 | -3.746  | -0.864 | 0.735 | -3.136 | -0.023 | 1.71E-03 | 18702 |
| 147 | Tha_PuL_L       | -0.053 | -0.179 | 0.073  | 0.064 | -0.828 | -0.006 | 4.07E-01 | 18540 | -0.293 | -0.503  | -0.082 | 0.108 | -2.721 | -0.020 | 6.51E-03 | 18702 |
| 148 | Tha_PuL_R       | -0.079 | -0.279 | 0.122  | 0.102 | -0.768 | -0.006 | 4.43E-01 | 18540 | -0.504 | -0.840  | -0.169 | 0.171 | -2.947 | -0.022 | 3.22E-03 | 18702 |
| 149 | Tha_PuL_L       | -0.010 | -0.045 | 0.024  | 0.018 | -0.599 | -0.004 | 5.49E-01 | 18540 | -0.030 | -0.088  | 0.027  | 0.029 | -1.035 | -0.008 | 3.01E-01 | 18702 |
| 150 | Tha_PuL_R       | -0.003 | -0.048 | 0.043  | 0.023 | -0.126 | -0.001 | 9.00E-01 | 18540 | -0.048 | -0.124  | 0.028  | 0.039 | -1.236 | -0.009 | 2.16E-01 | 18702 |
| 151 | ACC_sub_L       | -0.190 | -0.585 | 0.206  | 0.202 | -0.940 | -0.007 | 3.47E-01 | 18540 | -0.265 | -0.927  | 0.396  | 0.338 | -0.786 | -0.006 | 4.32E-01 | 18702 |
| 152 | ACC_sub_R       | -0.273 | -0.643 | 0.096  | 0.188 | -1.451 | -0.011 | 1.47E-01 | 18540 | -0.220 | -0.838  | 0.398  | 0.315 | -0.697 | -0.005 | 4.86E-01 | 18702 |
| 153 | ACC_pre_L       | -0.703 | -1.716 | 0.311  | 0.517 | -1.358 | -0.010 | 1.74E-01 | 18540 | -1.972 | -3.667  | -0.276 | 0.865 | -2.279 | -0.017 | 2.27E-02 | 18702 |
| 154 | ACC_pre_R       | -0.586 | -1.562 | 0.390  | 0.498 | -1.177 | -0.009 | 2.39E-01 | 18540 | -1.644 | -3.278  | -0.010 | 0.834 | -1.972 | -0.014 | 4.86E-02 | 18702 |
| 155 | ACC_sup_L       | -0.207 | -1.309 | 0.895  | 0.562 | -0.368 | -0.003 | 7.13E-01 | 18540 | -1.166 | -3.010  | 0.678  | 0.941 | -1.240 | -0.009 | 2.15E-01 | 18702 |
| 156 | ACC_sup_R       | -0.418 | -1.559 | 0.723  | 0.582 | -0.718 | -0.005 | 4.73E-01 | 18540 | -0.872 | -2.782  | 1.038  | 0.974 | -0.895 | -0.007 | 3.71E-01 | 18702 |

|     |         |        |        |        |       |        |        |          |       |        |        |        |       |        |        |          |       |
|-----|---------|--------|--------|--------|-------|--------|--------|----------|-------|--------|--------|--------|-------|--------|--------|----------|-------|
| 157 | N_Acc_L | -0.313 | -0.644 | 0.019  | 0.169 | -1.848 | -0.014 | 6.46E-02 | 18540 | -0.784 | -1.339 | -0.229 | 0.283 | -2.768 | -0.020 | 5.64E-03 | 18702 |
| 158 | N_Acc_R | -0.328 | -0.614 | -0.042 | 0.146 | -2.245 | -0.016 | 2.48E-02 | 18540 | -0.573 | -1.053 | -0.092 | 0.245 | -2.338 | -0.017 | 1.94E-02 | 18702 |
| 159 | VTA_L   | -0.002 | -0.013 | 0.010  | 0.006 | -0.264 | -0.002 | 7.92E-01 | 18540 | 0.013  | -0.007 | 0.032  | 0.010 | 1.295  | 0.009  | 1.95E-01 | 18702 |
| 160 | VTA_R   | -0.003 | -0.014 | 0.007  | 0.005 | -0.595 | -0.004 | 5.52E-01 | 18540 | 0.020  | 0.002  | 0.037  | 0.009 | 2.208  | 0.016  | 2.72E-02 | 18702 |
| 161 | SN_pc_L | -0.004 | -0.023 | 0.015  | 0.010 | -0.445 | -0.003 | 6.57E-01 | 18540 | -0.011 | -0.042 | 0.021  | 0.016 | -0.664 | -0.005 | 5.07E-01 | 18702 |
| 162 | SN_pc_R | -0.020 | -0.045 | 0.005  | 0.013 | -1.601 | -0.012 | 1.09E-01 | 18540 | 0.016  | -0.025 | 0.057  | 0.021 | 0.757  | 0.006  | 4.49E-01 | 18702 |
| 163 | SN_pr_L | -0.018 | -0.044 | 0.007  | 0.013 | -1.391 | -0.010 | 1.64E-01 | 18540 | -0.019 | -0.061 | 0.024  | 0.022 | -0.860 | -0.006 | 3.90E-01 | 18702 |
| 164 | SN_pr_R | -0.035 | -0.064 | -0.006 | 0.015 | -2.391 | -0.018 | 1.68E-02 | 18540 | 0.015  | -0.032 | 0.063  | 0.024 | 0.629  | 0.005  | 5.29E-01 | 18702 |
| 165 | Red_N_L | -0.029 | -0.060 | 0.003  | 0.016 | -1.784 | -0.013 | 7.44E-02 | 18540 | 0.003  | -0.050 | 0.056  | 0.027 | 0.114  | 0.001  | 9.09E-01 | 18702 |
| 166 | Red_N_R | -0.038 | -0.072 | -0.004 | 0.017 | -2.181 | -0.016 | 2.92E-02 | 18540 | 0.021  | -0.036 | 0.078  | 0.029 | 0.714  | 0.005  | 4.75E-01 | 18702 |
| 167 | LC_L    | -0.008 | -0.020 | 0.004  | 0.006 | -1.353 | -0.010 | 1.76E-01 | 18540 | 0.016  | -0.004 | 0.035  | 0.010 | 1.566  | 0.011  | 1.17E-01 | 18702 |
| 168 | LC_R    | -0.015 | -0.028 | -0.002 | 0.007 | -2.317 | -0.017 | 2.05E-02 | 18540 | 0.014  | -0.007 | 0.036  | 0.011 | 1.325  | 0.010  | 1.85E-01 | 18702 |
| 169 | Raphe_D | -0.042 | -0.088 | 0.003  | 0.023 | -1.823 | -0.013 | 6.84E-02 | 18540 | -0.010 | -0.086 | 0.066  | 0.039 | -0.254 | -0.002 | 8.00E-01 | 18702 |
| 170 | Raphe_M | -0.008 | -0.022 | 0.006  | 0.007 | -1.145 | -0.008 | 2.52E-01 | 18540 | 0.012  | -0.011 | 0.035  | 0.012 | 1.033  | 0.008  | 3.02E-01 | 18702 |

| Dried fruit intake |                      |         |         |         |        |        |        |          |       | Lamb/mutton intake |          |         |         |        |        |          |       |
|--------------------|----------------------|---------|---------|---------|--------|--------|--------|----------|-------|--------------------|----------|---------|---------|--------|--------|----------|-------|
| Number             | AAL 3 region         | beta    | 95%CI l | 95%CI h | se     | t      | r      | p        | df.e  | beta               | 95%CI l  | 95%CI h | se      | t      | r      | p        | df.e  |
| 0                  | Total brain          | 163.394 | 40.297  | 286.492 | 62.802 | 2.602  | 0.019  | 9.28E-03 | 18314 | -341.713           | -586.037 | -97.388 | 124.650 | -2.741 | -0.020 | 6.12E-03 | 18664 |
| 1                  | Precentral_L         | -0.382  | -4.723  | 3.960   | 2.215  | -0.172 | -0.001 | 8.63E-01 | 18314 | -3.116             | -11.725  | 5.493   | 4.392   | -0.709 | -0.005 | 4.78E-01 | 18664 |
| 2                  | Precentral_R         | 2.677   | -1.291  | 6.645   | 2.024  | 1.322  | 0.010  | 1.86E-01 | 18314 | -2.946             | -10.828  | 4.935   | 4.021   | -0.733 | -0.005 | 4.64E-01 | 18664 |
| 3                  | Frontal_Sup_2_L      | 3.981   | -0.590  | 8.552   | 2.332  | 1.707  | 0.013  | 8.79E-02 | 18314 | -9.679             | -18.767  | -0.591  | 4.637   | -2.088 | -0.015 | 3.68E-02 | 18664 |
| 4                  | Frontal_Sup_2_R      | 5.028   | -0.015  | 10.072  | 2.573  | 1.954  | 0.014  | 5.07E-02 | 18314 | -5.127             | -15.143  | 4.888   | 5.110   | -1.003 | -0.007 | 3.16E-01 | 18664 |
| 5                  | Frontal_Mid_2_L      | 4.752   | -0.051  | 9.556   | 2.451  | 1.939  | 0.014  | 5.25E-02 | 18314 | -6.516             | -16.059  | 3.027   | 4.869   | -1.338 | -0.010 | 1.81E-01 | 18664 |
| 6                  | Frontal_Mid_2_R      | 6.563   | 1.129   | 11.998  | 2.773  | 2.367  | 0.017  | 1.79E-02 | 18314 | -11.810            | -22.607  | -1.012  | 5.509   | -2.144 | -0.016 | 3.21E-02 | 18664 |
| 7                  | Frontal_Inf_Oper_L   | 1.984   | 0.564   | 3.403   | 0.724  | 2.739  | 0.020  | 6.16E-03 | 18314 | -2.771             | -5.590   | 0.048   | 1.438   | -1.927 | -0.014 | 5.40E-02 | 18664 |
| 8                  | Frontal_Inf_Oper_R   | 1.572   | -0.208  | 3.352   | 0.908  | 1.731  | 0.013  | 8.35E-02 | 18314 | -4.805             | -8.340   | -1.269  | 1.804   | -2.664 | -0.019 | 7.73E-03 | 18664 |
| 9                  | Frontal_Inf_Tri_L    | 4.153   | 1.139   | 7.168   | 1.538  | 2.700  | 0.020  | 6.93E-03 | 18314 | -0.813             | -6.803   | 5.177   | 3.056   | -0.266 | -0.002 | 7.90E-01 | 18664 |
| 10                 | Frontal_Inf_Tri_R    | 2.552   | 0.185   | 4.920   | 1.208  | 2.113  | 0.016  | 3.46E-02 | 18314 | -3.678             | -8.383   | 1.026   | 2.400   | -1.532 | -0.011 | 1.25E-01 | 18664 |
| 11                 | Frontal_Inf_Orb_2_L  | 0.567   | -0.335  | 1.468   | 0.460  | 1.232  | 0.009  | 2.18E-01 | 18314 | -0.335             | -2.127   | 1.456   | 0.914   | -0.367 | -0.003 | 7.14E-01 | 18664 |
| 12                 | Frontal_Inf_Orb_2_R  | 0.842   | -0.100  | 1.785   | 0.481  | 1.752  | 0.013  | 7.98E-02 | 18314 | -0.409             | -2.281   | 1.463   | 0.955   | -0.428 | -0.003 | 6.69E-01 | 18664 |
| 13                 | Rolandic_Oper_L      | 0.053   | -1.311  | 1.417   | 0.696  | 0.077  | 0.001  | 9.39E-01 | 18314 | -1.638             | -4.346   | 1.070   | 1.382   | -1.186 | -0.009 | 2.36E-01 | 18664 |
| 14                 | Rolandic_Oper_R      | 0.205   | -1.746  | 2.157   | 0.996  | 0.206  | 0.002  | 8.37E-01 | 18314 | -2.810             | -6.685   | 1.065   | 1.977   | -1.421 | -0.010 | 1.55E-01 | 18664 |
| 15                 | Supp_Motor_Area_L    | -0.400  | -3.638  | 2.839   | 1.652  | -0.242 | -0.002 | 8.09E-01 | 18314 | -2.156             | -8.591   | 4.278   | 3.283   | -0.657 | -0.005 | 5.11E-01 | 18664 |
| 16                 | Supp_Motor_Area_R    | -0.087  | -3.669  | 3.494   | 1.827  | -0.048 | 0.000  | 9.62E-01 | 18314 | -4.246             | -11.360  | 2.868   | 3.629   | -1.170 | -0.009 | 2.42E-01 | 18664 |
| 17                 | Olfactory_L          | 0.361   | -0.121  | 0.844   | 0.246  | 1.469  | 0.011  | 1.42E-01 | 18314 | 0.280              | -0.677   | 1.237   | 0.488   | 0.573  | 0.004  | 5.67E-01 | 18664 |
| 18                 | Olfactory_R          | 0.315   | -0.169  | 0.799   | 0.247  | 1.276  | 0.009  | 2.02E-01 | 18314 | -0.251             | -1.211   | 0.708   | 0.489   | -0.514 | -0.004 | 6.08E-01 | 18664 |
| 19                 | Frontal_Sup_Medial_L | 5.266   | 2.230   | 8.303   | 1.549  | 3.399  | 0.025  | 6.77E-04 | 18314 | -6.896             | -12.926  | -0.866  | 3.076   | -2.242 | -0.016 | 2.50E-02 | 18664 |
| 20                 | Frontal_Sup_Medial_R | 3.155   | 0.945   | 5.364   | 1.127  | 2.799  | 0.021  | 5.14E-03 | 18314 | -3.159             | -7.548   | 1.230   | 2.239   | -1.411 | -0.010 | 1.58E-01 | 18664 |
| 21                 | Frontal_Med_Orb_L    | 1.651   | 0.515   | 2.788   | 0.580  | 2.848  | 0.021  | 4.40E-03 | 18314 | -2.925             | -5.180   | -0.670  | 1.150   | -2.542 | -0.019 | 1.10E-02 | 18664 |
| 22                 | Frontal_Med_Orb_R    | 1.874   | 0.477   | 3.271   | 0.713  | 2.630  | 0.019  | 8.55E-03 | 18314 | -2.440             | -5.210   | 0.330   | 1.413   | -1.726 | -0.013 | 8.43E-02 | 18664 |
| 23                 | Rectus_L             | 1.292   | 0.117   | 2.468   | 0.600  | 2.155  | 0.016  | 3.12E-02 | 18314 | -1.345             | -3.679   | 0.988   | 1.190   | -1.130 | -0.008 | 2.59E-01 | 18664 |
| 24                 | Rectus_R             | 1.618   | 0.531   | 2.706   | 0.555  | 2.917  | 0.022  | 3.54E-03 | 18314 | -1.063             | -3.221   | 1.095   | 1.101   | -0.966 | -0.007 | 3.34E-01 | 18664 |
| 25                 | OFCmed_L             | 0.467   | -0.213  | 1.148   | 0.347  | 1.347  | 0.010  | 1.78E-01 | 18314 | -0.219             | -1.571   | 1.133   | 0.690   | -0.318 | -0.002 | 7.50E-01 | 18664 |
| 26                 | OFCmed_R             | 0.846   | 0.053   | 1.639   | 0.405  | 2.090  | 0.015  | 3.66E-02 | 18314 | -0.392             | -1.967   | 1.184   | 0.804   | -0.487 | -0.004 | 6.26E-01 | 18664 |
| 27                 | OFCant_L             | 0.145   | -0.643  | 0.933   | 0.402  | 0.361  | 0.003  | 7.18E-01 | 18314 | -1.075             | -2.640   | 0.489   | 0.798   | -1.347 | -0.010 | 1.78E-01 | 18664 |
| 28                 | OFCant_R             | 0.794   | -0.245  | 1.833   | 0.530  | 1.497  | 0.011  | 1.34E-01 | 18314 | -1.634             | -3.699   | 0.432   | 1.054   | -1.550 | -0.011 | 1.21E-01 | 18664 |
| 29                 | OFCpost_L            | 0.339   | -0.646  | 1.324   | 0.503  | 0.674  | 0.005  | 5.00E-01 | 18314 | -0.341             | -2.299   | 1.618   | 0.999   | -0.341 | -0.002 | 7.33E-01 | 18664 |
| 30                 | OFCpost_R            | 0.398   | -0.514  | 1.309   | 0.465  | 0.855  | 0.006  | 3.93E-01 | 18314 | -0.367             | -2.176   | 1.441   | 0.923   | -0.398 | -0.003 | 6.90E-01 | 18664 |
| 31                 | OFClat_L             | 0.459   | 0.127   | 0.792   | 0.170  | 2.709  | 0.020  | 6.76E-03 | 18314 | -0.090             | -0.751   | 0.571   | 0.337   | -0.266 | -0.002 | 7.90E-01 | 18664 |
| 32                 | OFClat_R             | 0.494   | 0.213   | 0.774   | 0.143  | 3.449  | 0.025  | 5.64E-04 | 18314 | -0.303             | -0.860   | 0.255   | 0.285   | -1.064 | -0.008 | 2.88E-01 | 18664 |

|    |                      |        |        |        |       |        |        |          |       |        |         |        |       |        |        |          |       |
|----|----------------------|--------|--------|--------|-------|--------|--------|----------|-------|--------|---------|--------|-------|--------|--------|----------|-------|
| 33 | Insula_L             | 0.547  | -2.505 | 3.600  | 1.557 | 0.351  | 0.003  | 7.25E-01 | 18314 | -3.229 | -9.282  | 2.825  | 3.088 | -1.045 | -0.008 | 2.96E-01 | 18664 |
| 34 | Insula_R             | -0.089 | -3.063 | 2.886  | 1.517 | -0.058 | 0.000  | 9.53E-01 | 18314 | -3.991 | -9.887  | 1.905  | 3.008 | -1.327 | -0.010 | 1.85E-01 | 18664 |
| 37 | Cingulate_Mid_L      | 3.746  | 1.167  | 6.326  | 1.316 | 2.847  | 0.021  | 4.42E-03 | 18314 | -8.235 | -13.346 | -3.124 | 2.608 | -3.158 | -0.023 | 1.59E-03 | 18664 |
| 38 | Cingulate_Mid_R      | 1.703  | -1.049 | 4.455  | 1.404 | 1.213  | 0.009  | 2.25E-01 | 18314 | -6.565 | -12.016 | -1.114 | 2.781 | -2.360 | -0.017 | 1.83E-02 | 18664 |
| 39 | Cingulate_Post_L     | -0.306 | -1.094 | 0.481  | 0.402 | -0.762 | -0.006 | 4.46E-01 | 18314 | -1.081 | -2.643  | 0.481  | 0.797 | -1.356 | -0.010 | 1.75E-01 | 18664 |
| 40 | Cingulate_Post_R     | -0.367 | -0.804 | 0.070  | 0.223 | -1.646 | -0.012 | 9.98E-02 | 18314 | -0.025 | -0.892  | 0.841  | 0.442 | -0.057 | 0.000  | 9.54E-01 | 18664 |
| 41 | Hippocampus_L        | 1.077  | -0.195 | 2.349  | 0.649 | 1.659  | 0.012  | 9.71E-02 | 18314 | -0.921 | -3.450  | 1.608  | 1.290 | -0.714 | -0.005 | 4.76E-01 | 18664 |
| 42 | Hippocampus_R        | 1.496  | 0.175  | 2.816  | 0.674 | 2.221  | 0.016  | 2.64E-02 | 18314 | -1.329 | -3.950  | 1.293  | 1.337 | -0.993 | -0.007 | 3.21E-01 | 18664 |
| 43 | ParaHippocampal_L    | 1.458  | 0.327  | 2.589  | 0.577 | 2.528  | 0.019  | 1.15E-02 | 18314 | -1.591 | -3.837  | 0.656  | 1.146 | -1.388 | -0.010 | 1.65E-01 | 18664 |
| 44 | ParaHippocampal_R    | 1.281  | -0.148 | 2.709  | 0.729 | 1.757  | 0.013  | 7.90E-02 | 18314 | -1.545 | -4.379  | 1.289  | 1.446 | -1.069 | -0.008 | 2.85E-01 | 18664 |
| 45 | Amygdala_L           | -0.022 | -0.462 | 0.418  | 0.224 | -0.097 | -0.001 | 9.23E-01 | 18314 | -0.236 | -1.110  | 0.637  | 0.446 | -0.530 | -0.004 | 5.96E-01 | 18664 |
| 46 | Amygdala_R           | -0.008 | -0.458 | 0.442  | 0.230 | -0.035 | 0.000  | 9.72E-01 | 18314 | -0.586 | -1.478  | 0.307  | 0.455 | -1.287 | -0.009 | 1.98E-01 | 18664 |
| 47 | Calcarine_L          | 1.594  | -2.599 | 5.787  | 2.139 | 0.745  | 0.006  | 4.56E-01 | 18314 | -0.396 | -8.732  | 7.939  | 4.253 | -0.093 | -0.001 | 9.26E-01 | 18664 |
| 48 | Calcarine_R          | 0.362  | -3.142 | 3.867  | 1.788 | 0.203  | 0.001  | 8.39E-01 | 18314 | -0.049 | -7.016  | 6.917  | 3.554 | -0.014 | 0.000  | 9.89E-01 | 18664 |
| 49 | Cuneus_L             | 1.238  | -1.395 | 3.872  | 1.343 | 0.922  | 0.007  | 3.57E-01 | 18314 | -1.208 | -6.433  | 4.017  | 2.666 | -0.453 | -0.003 | 6.50E-01 | 18664 |
| 50 | Cuneus_R             | -0.605 | -2.620 | 1.410  | 1.028 | -0.588 | -0.004 | 5.56E-01 | 18314 | -1.798 | -5.795  | 2.198  | 2.039 | -0.882 | -0.006 | 3.78E-01 | 18664 |
| 51 | Lingual_L            | 2.541  | 0.020  | 5.063  | 1.287 | 1.975  | 0.015  | 4.82E-02 | 18314 | -1.736 | -6.748  | 3.275  | 2.557 | -0.679 | -0.005 | 4.97E-01 | 18664 |
| 52 | Lingual_R            | 1.046  | -1.597 | 3.688  | 1.348 | 0.776  | 0.006  | 4.38E-01 | 18314 | -0.199 | -5.450  | 5.053  | 2.679 | -0.074 | -0.001 | 9.41E-01 | 18664 |
| 53 | Occipital_Sup_L      | 1.701  | -0.034 | 3.435  | 0.885 | 1.922  | 0.014  | 5.46E-02 | 18314 | -3.699 | -7.145  | -0.254 | 1.758 | -2.105 | -0.015 | 3.53E-02 | 18664 |
| 54 | Occipital_Sup_R      | -0.075 | -1.956 | 1.806  | 0.960 | -0.078 | -0.001 | 9.38E-01 | 18314 | -2.155 | -5.887  | 1.577  | 1.904 | -1.132 | -0.008 | 2.58E-01 | 18664 |
| 55 | Occipital_Mid_L      | -3.786 | -7.855 | 0.283  | 2.076 | -1.824 | -0.013 | 6.82E-02 | 18314 | -5.070 | -13.145 | 3.005  | 4.120 | -1.231 | -0.009 | 2.18E-01 | 18664 |
| 56 | Occipital_Mid_R      | -0.108 | -2.940 | 2.723  | 1.445 | -0.075 | -0.001 | 9.40E-01 | 18314 | -0.613 | -6.232  | 5.006  | 2.867 | -0.214 | -0.002 | 8.31E-01 | 18664 |
| 57 | Occipital_Inf_L      | -1.152 | -2.503 | 0.199  | 0.689 | -1.671 | -0.012 | 9.47E-02 | 18314 | -2.588 | -5.269  | 0.094  | 1.368 | -1.892 | -0.014 | 5.85E-02 | 18664 |
| 58 | Occipital_Inf_R      | -1.999 | -3.558 | -0.439 | 0.796 | -2.512 | -0.019 | 1.20E-02 | 18314 | 0.606  | -2.489  | 3.700  | 1.579 | 0.384  | 0.003  | 7.01E-01 | 18664 |
| 59 | Fusiform_L           | 2.513  | -0.440 | 5.465  | 1.506 | 1.668  | 0.012  | 9.53E-02 | 18314 | -7.308 | -13.176 | -1.441 | 2.993 | -2.442 | -0.018 | 1.46E-02 | 18664 |
| 60 | Fusiform_R           | 2.792  | -0.455 | 6.039  | 1.657 | 1.686  | 0.012  | 9.19E-02 | 18314 | -4.606 | -11.051 | 1.839  | 3.288 | -1.401 | -0.010 | 1.61E-01 | 18664 |
| 61 | Postcentral_L        | 5.700  | 1.260  | 10.140 | 2.265 | 2.516  | 0.019  | 1.19E-02 | 18314 | -7.322 | -16.143 | 1.499  | 4.500 | -1.627 | -0.012 | 1.04E-01 | 18664 |
| 62 | Postcentral_R        | 6.082  | 1.528  | 10.636 | 2.323 | 2.618  | 0.019  | 8.86E-03 | 18314 | -5.895 | -14.940 | 3.150  | 4.615 | -1.277 | -0.009 | 2.01E-01 | 18664 |
| 63 | Parietal_Sup_L       | 0.065  | -2.494 | 2.624  | 1.306 | 0.050  | 0.000  | 9.60E-01 | 18314 | -0.511 | -5.595  | 4.573  | 2.594 | -0.197 | -0.001 | 8.44E-01 | 18664 |
| 64 | Parietal_Sup_R       | 0.699  | -1.574 | 2.972  | 1.160 | 0.603  | 0.004  | 5.47E-01 | 18314 | -0.647 | -5.154  | 3.861  | 2.300 | -0.281 | -0.002 | 7.79E-01 | 18664 |
| 65 | Parietal_Inf_L       | 2.158  | -1.193 | 5.510  | 1.710 | 1.262  | 0.009  | 2.07E-01 | 18314 | -6.360 | -13.014 | 0.294  | 3.395 | -1.873 | -0.014 | 6.10E-02 | 18664 |
| 66 | Parietal_Inf_R       | 1.011  | -1.161 | 3.183  | 1.108 | 0.912  | 0.007  | 3.62E-01 | 18314 | -2.856 | -7.167  | 1.455  | 2.199 | -1.299 | -0.010 | 1.94E-01 | 18664 |
| 67 | SupraMarginal_L      | 1.185  | -0.779 | 3.149  | 1.002 | 1.183  | 0.009  | 2.37E-01 | 18314 | -5.101 | -9.003  | -1.199 | 1.991 | -2.562 | -0.019 | 1.04E-02 | 18664 |
| 68 | SupraMarginal_R      | 1.964  | -0.812 | 4.739  | 1.416 | 1.387  | 0.010  | 1.65E-01 | 18314 | -9.279 | -14.795 | -3.762 | 2.814 | -3.297 | -0.024 | 9.79E-04 | 18664 |
| 69 | Angular_L            | 1.490  | -0.440 | 3.420  | 0.985 | 1.513  | 0.011  | 1.30E-01 | 18314 | -4.570 | -8.401  | -0.739 | 1.954 | -2.338 | -0.017 | 1.94E-02 | 18664 |
| 70 | Angular_R            | 1.951  | -0.640 | 4.542  | 1.322 | 1.476  | 0.011  | 1.40E-01 | 18314 | -2.327 | -7.465  | 2.811  | 2.621 | -0.888 | -0.006 | 3.75E-01 | 18664 |
| 71 | Precuneus_L          | 2.070  | -2.638 | 6.779  | 2.402 | 0.862  | 0.006  | 3.89E-01 | 18314 | -1.834 | -11.168 | 7.500  | 4.762 | -0.385 | -0.003 | 7.00E-01 | 18664 |
| 72 | Precuneus_R          | -0.037 | -4.232 | 4.158  | 2.140 | -0.017 | 0.000  | 9.86E-01 | 18314 | -2.575 | -10.887 | 5.738  | 4.241 | -0.607 | -0.004 | 5.44E-01 | 18664 |
| 73 | Paracentral_Lobule_L | -1.060 | -3.213 | 1.092  | 1.098 | -0.965 | -0.007 | 3.34E-01 | 18314 | 0.285  | -3.993  | 4.563  | 2.183 | 0.131  | 0.001  | 8.96E-01 | 18664 |
| 74 | Paracentral_Lobule_R | -0.550 | -2.093 | 0.992  | 0.787 | -0.699 | -0.005 | 4.84E-01 | 18314 | -0.349 | -3.413  | 2.716  | 1.563 | -0.223 | -0.002 | 8.24E-01 | 18664 |
| 75 | Caudate_L            | 0.752  | -0.964 | 2.468  | 0.875 | 0.859  | 0.006  | 3.90E-01 | 18314 | -3.253 | -6.670  | 0.165  | 1.744 | -1.865 | -0.014 | 6.21E-02 | 18664 |
| 76 | Caudate_R            | 1.167  | -0.777 | 3.110  | 0.992 | 1.177  | 0.009  | 2.39E-01 | 18314 | -5.146 | -9.013  | -1.278 | 1.973 | -2.608 | -0.019 | 9.11E-03 | 18664 |
| 77 | Putamen_L            | 2.133  | -0.479 | 4.744  | 1.332 | 1.601  | 0.012  | 1.09E-01 | 18314 | -5.996 | -11.184 | -0.809 | 2.646 | -2.266 | -0.017 | 2.35E-02 | 18664 |
| 78 | Putamen_R            | 1.749  | -0.910 | 4.408  | 1.356 | 1.290  | 0.010  | 1.97E-01 | 18314 | -6.072 | -11.355 | -0.789 | 2.695 | -2.253 | -0.016 | 2.43E-02 | 18664 |
| 79 | Pallidum_L           | 0.049  | -0.183 | 0.282  | 0.119 | 0.417  | 0.003  | 6.76E-01 | 18314 | -0.216 | -0.677  | 0.245  | 0.235 | -0.918 | -0.007 | 3.59E-01 | 18664 |
| 80 | Pallidum_R           | 0.011  | -0.244 | 0.265  | 0.130 | 0.082  | 0.001  | 9.35E-01 | 18314 | -0.434 | -0.941  | 0.072  | 0.258 | -1.682 | -0.012 | 9.27E-02 | 18664 |
| 83 | Heschl_L             | -0.154 | -0.625 | 0.317  | 0.240 | -0.640 | -0.005 | 5.22E-01 | 18314 | -0.314 | -1.249  | 0.621  | 0.477 | -0.657 | -0.005 | 5.11E-01 | 18664 |
| 84 | Heschl_R             | -0.061 | -0.587 | 0.466  | 0.269 | -0.226 | -0.002 | 8.21E-01 | 18314 | -0.756 | -1.801  | 0.289  | 0.533 | -1.419 | -0.010 | 1.56E-01 | 18664 |
| 85 | Temporal_Sup_L       | -0.312 | -3.710 | 3.087  | 1.734 | -0.180 | -0.001 | 8.57E-01 | 18314 | -5.050 | -11.801 | 1.701  | 3.444 | -1.466 | -0.011 | 1.43E-01 | 18664 |

|     |                     |        |        |        |       |        |        |          |       |        |         |        |       |        |        |          |       |
|-----|---------------------|--------|--------|--------|-------|--------|--------|----------|-------|--------|---------|--------|-------|--------|--------|----------|-------|
| 86  | TemporaL_Sup_R      | 1.106  | -2.655 | 4.867  | 1.919 | 0.576  | 0.004  | 5.64E-01 | 18314 | -8.642 | -16.107 | -1.177 | 3.809 | -2.269 | -0.017 | 2.33E-02 | 18664 |
| 87  | TemporaL_Pole_Sup_L | 0.665  | -0.948 | 2.278  | 0.823 | 0.808  | 0.006  | 4.19E-01 | 18314 | -0.924 | -4.121  | 2.272  | 1.631 | -0.567 | -0.004 | 5.71E-01 | 18664 |
| 88  | TemporaL_Pole_Sup_R | 1.060  | -0.639 | 2.758  | 0.867 | 1.223  | 0.009  | 2.21E-01 | 18314 | -2.556 | -5.920  | 0.809  | 1.716 | -1.489 | -0.011 | 1.37E-01 | 18664 |
| 89  | TemporaL_Mid_L      | 3.722  | -1.942 | 9.386  | 2.890 | 1.288  | 0.010  | 1.98E-01 | 18314 | -7.990 | -19.240 | 3.260  | 5.739 | -1.392 | -0.010 | 1.64E-01 | 18664 |
| 90  | TemporaL_Mid_R      | 1.196  | -3.838 | 6.231  | 2.568 | 0.466  | 0.003  | 6.41E-01 | 18314 | -8.937 | -18.916 | 1.041  | 5.091 | -1.756 | -0.013 | 7.92E-02 | 18664 |
| 91  | TemporaL_Pole_Mid_L | 0.907  | -0.448 | 2.261  | 0.691 | 1.312  | 0.010  | 1.90E-01 | 18314 | -1.090 | -3.778  | 1.599  | 1.372 | -0.795 | -0.006 | 4.27E-01 | 18664 |
| 92  | TemporaL_Pole_Mid_R | 1.496  | -0.150 | 3.142  | 0.840 | 1.782  | 0.013  | 7.48E-02 | 18314 | -2.328 | -5.592  | 0.936  | 1.665 | -1.398 | -0.010 | 1.62E-01 | 18664 |
| 93  | TemporaL_Inf_L      | 0.217  | -3.677 | 4.111  | 1.986 | 0.109  | 0.001  | 9.13E-01 | 18314 | -5.242 | -12.975 | 2.491  | 3.945 | -1.329 | -0.010 | 1.84E-01 | 18664 |
| 94  | TemporaL_Inf_R      | -0.763 | -5.016 | 3.489  | 2.169 | -0.352 | -0.003 | 7.25E-01 | 18314 | -5.526 | -13.948 | 2.896  | 4.297 | -1.286 | -0.009 | 1.98E-01 | 18664 |
| 95  | Cerebellum_Crus1_L  | 4.483  | -0.145 | 9.111  | 2.361 | 1.899  | 0.014  | 5.76E-02 | 18314 | -6.450 | -15.634 | 2.734  | 4.685 | -1.377 | -0.010 | 1.69E-01 | 18664 |
| 96  | Cerebellum_Crus1_R  | 5.323  | 0.605  | 10.040 | 2.407 | 2.212  | 0.016  | 2.70E-02 | 18314 | -5.279 | -14.649 | 4.092  | 4.780 | -1.104 | -0.008 | 2.70E-01 | 18664 |
| 97  | Cerebellum_Crus2_L  | 4.306  | 0.642  | 7.971  | 1.870 | 2.303  | 0.017  | 2.13E-02 | 18314 | -6.333 | -13.625 | 0.959  | 3.720 | -1.702 | -0.012 | 8.87E-02 | 18664 |
| 98  | Cerebellum_Crus2_R  | 4.195  | 0.805  | 7.585  | 1.730 | 2.425  | 0.018  | 1.53E-02 | 18314 | -4.644 | -11.389 | 2.102  | 3.442 | -1.349 | -0.010 | 1.77E-01 | 18664 |
| 99  | Cerebellum_3_L      | 0.113  | -0.133 | 0.360  | 0.126 | 0.899  | 0.007  | 3.69E-01 | 18314 | 0.234  | -0.255  | 0.724  | 0.250 | 0.938  | 0.007  | 3.48E-01 | 18664 |
| 100 | Cerebellum_3_R      | 0.188  | -0.145 | 0.520  | 0.170 | 1.105  | 0.008  | 2.69E-01 | 18314 | 0.330  | -0.330  | 0.991  | 0.337 | 0.981  | 0.007  | 3.27E-01 | 18664 |
| 101 | Cerebellum_4_5_L    | 2.236  | 0.242  | 4.230  | 1.017 | 2.198  | 0.016  | 2.80E-02 | 18314 | 0.038  | -3.919  | 3.995  | 2.019 | 0.019  | 0.000  | 9.85E-01 | 18664 |
| 102 | Cerebellum_4_5_R    | 1.698  | 0.073  | 3.322  | 0.829 | 2.048  | 0.015  | 4.05E-02 | 18314 | 0.385  | -2.840  | 3.610  | 1.645 | 0.234  | 0.002  | 8.15E-01 | 18664 |
| 103 | Cerebellum_6_L      | 3.956  | 0.507  | 7.404  | 1.759 | 2.248  | 0.017  | 2.46E-02 | 18314 | -8.186 | -15.024 | -1.349 | 3.488 | -2.347 | -0.017 | 1.89E-02 | 18664 |
| 104 | Cerebellum_6_R      | 4.539  | 0.909  | 8.169  | 1.852 | 2.451  | 0.018  | 1.43E-02 | 18314 | -4.678 | -11.884 | 2.528  | 3.676 | -1.272 | -0.009 | 2.03E-01 | 18664 |
| 105 | Cerebellum_7b_L     | 1.703  | 0.582  | 2.823  | 0.572 | 2.978  | 0.022  | 2.90E-03 | 18314 | -1.399 | -3.628  | 0.829  | 1.137 | -1.231 | -0.009 | 2.18E-01 | 18664 |
| 106 | Cerebellum_7b_R     | 2.087  | 0.977  | 3.198  | 0.566 | 3.685  | 0.027  | 2.29E-04 | 18314 | -2.015 | -4.224  | 0.195  | 1.127 | -1.788 | -0.013 | 7.39E-02 | 18664 |
| 107 | Cerebellum_8_L      | 3.463  | -0.095 | 7.020  | 1.815 | 1.908  | 0.014  | 5.64E-02 | 18314 | -3.543 | -10.616 | 3.530  | 3.609 | -0.982 | -0.007 | 3.26E-01 | 18664 |
| 108 | Cerebellum_8_R      | 7.546  | 2.912  | 12.180 | 2.364 | 3.192  | 0.024  | 1.42E-03 | 18314 | -7.960 | -17.167 | 1.247  | 4.697 | -1.695 | -0.012 | 9.02E-02 | 18664 |
| 109 | Cerebellum_9_L      | -1.412 | -3.425 | 0.602  | 1.027 | -1.374 | -0.010 | 1.69E-01 | 18314 | -2.618 | -6.617  | 1.380  | 2.040 | -1.283 | -0.009 | 1.99E-01 | 18664 |
| 110 | Cerebellum_9_R      | -1.261 | -3.242 | 0.721  | 1.011 | -1.247 | -0.009 | 2.12E-01 | 18314 | -1.890 | -5.821  | 2.041  | 2.005 | -0.943 | -0.007 | 3.46E-01 | 18664 |
| 111 | Cerebellum_10_L     | -0.139 | -0.282 | 0.004  | 0.073 | -1.902 | -0.014 | 5.72E-02 | 18314 | -0.086 | -0.370  | 0.198  | 0.145 | -0.593 | -0.004 | 5.53E-01 | 18664 |
| 112 | Cerebellum_10_R     | -0.019 | -0.168 | 0.129  | 0.076 | -0.254 | -0.002 | 7.99E-01 | 18314 | -0.072 | -0.368  | 0.223  | 0.151 | -0.481 | -0.004 | 6.31E-01 | 18664 |
| 113 | Vermis_1_2          | 0.003  | -0.090 | 0.096  | 0.047 | 0.058  | 0.000  | 9.54E-01 | 18314 | 0.083  | -0.102  | 0.267  | 0.094 | 0.877  | 0.006  | 3.80E-01 | 18664 |
| 114 | Vermis_3            | 0.245  | -0.125 | 0.614  | 0.188 | 1.298  | 0.010  | 1.94E-01 | 18314 | 0.014  | -0.720  | 0.747  | 0.374 | 0.037  | 0.000  | 9.70E-01 | 18664 |
| 115 | Vermis_4_5          | 0.925  | -0.160 | 2.010  | 0.553 | 1.671  | 0.012  | 9.48E-02 | 18314 | 0.113  | -2.043  | 2.269  | 1.100 | 0.103  | 0.001  | 9.18E-01 | 18664 |
| 116 | Vermis_6            | 0.030  | -0.574 | 0.634  | 0.308 | 0.097  | 0.001  | 9.22E-01 | 18314 | -0.596 | -1.796  | 0.604  | 0.612 | -0.973 | -0.007 | 3.30E-01 | 18664 |
| 117 | Vermis_7            | 0.097  | -0.245 | 0.439  | 0.174 | 0.554  | 0.004  | 5.80E-01 | 18314 | -0.362 | -1.040  | 0.317  | 0.346 | -1.045 | -0.008 | 2.96E-01 | 18664 |
| 118 | Vermis_8            | -0.047 | -0.608 | 0.515  | 0.286 | -0.163 | -0.001 | 8.71E-01 | 18314 | -1.228 | -2.343  | -0.113 | 0.569 | -2.159 | -0.016 | 3.08E-02 | 18664 |
| 119 | Vermis_9            | -0.263 | -0.718 | 0.192  | 0.232 | -1.132 | -0.008 | 2.58E-01 | 18314 | -0.419 | -1.323  | 0.484  | 0.461 | -0.910 | -0.007 | 3.63E-01 | 18664 |
| 120 | Vermis_10           | -0.111 | -0.238 | 0.016  | 0.065 | -1.709 | -0.013 | 8.74E-02 | 18314 | 0.083  | -0.169  | 0.335  | 0.129 | 0.645  | 0.005  | 5.19E-01 | 18664 |
| 121 | Tha_AV_L            | 0.062  | 0.011  | 0.112  | 0.026 | 2.385  | 0.018  | 1.71E-02 | 18314 | -0.072 | -0.173  | 0.029  | 0.052 | -1.391 | -0.010 | 1.64E-01 | 18664 |
| 122 | Tha_AV_R            | 0.104  | 0.031  | 0.176  | 0.037 | 2.807  | 0.021  | 5.01E-03 | 18314 | -0.054 | -0.199  | 0.090  | 0.074 | -0.738 | -0.005 | 4.60E-01 | 18664 |
| 123 | Tha_LP_L            | 0.089  | 0.032  | 0.145  | 0.029 | 3.087  | 0.023  | 2.03E-03 | 18314 | -0.087 | -0.199  | 0.024  | 0.057 | -1.531 | -0.011 | 1.26E-01 | 18664 |
| 124 | Tha_LP_R            | 0.119  | 0.046  | 0.192  | 0.037 | 3.191  | 0.024  | 1.42E-03 | 18314 | -0.113 | -0.259  | 0.033  | 0.074 | -1.521 | -0.011 | 1.28E-01 | 18664 |
| 125 | Tha_VA_L            | 0.039  | -0.021 | 0.099  | 0.031 | 1.275  | 0.009  | 2.02E-01 | 18314 | -0.029 | -0.149  | 0.090  | 0.061 | -0.480 | -0.004 | 6.31E-01 | 18664 |
| 126 | Tha_VA_R            | 0.063  | -0.010 | 0.137  | 0.038 | 1.683  | 0.012  | 9.23E-02 | 18314 | -0.040 | -0.186  | 0.107  | 0.075 | -0.529 | -0.004 | 5.97E-01 | 18664 |
| 127 | Tha_VL_L            | 0.179  | 0.009  | 0.350  | 0.087 | 2.060  | 0.015  | 3.94E-02 | 18314 | -0.321 | -0.660  | 0.018  | 0.173 | -1.855 | -0.014 | 6.36E-02 | 18664 |
| 128 | Tha_VL_R            | 0.358  | 0.131  | 0.584  | 0.116 | 3.097  | 0.023  | 1.95E-03 | 18314 | -0.386 | -0.837  | 0.065  | 0.230 | -1.680 | -0.012 | 9.31E-02 | 18664 |
| 129 | Tha_VPL_L           | 0.135  | -0.069 | 0.338  | 0.104 | 1.295  | 0.010  | 1.95E-01 | 18314 | -0.166 | -0.570  | 0.238  | 0.206 | -0.807 | -0.006 | 4.19E-01 | 18664 |
| 130 | Tha_VPL_R           | 0.299  | 0.085  | 0.513  | 0.109 | 2.740  | 0.020  | 6.14E-03 | 18314 | -0.269 | -0.693  | 0.156  | 0.217 | -1.239 | -0.009 | 2.15E-01 | 18664 |
| 131 | Tha_IL_L            | 0.153  | 0.065  | 0.241  | 0.045 | 3.420  | 0.025  | 6.29E-04 | 18314 | -0.187 | -0.361  | -0.012 | 0.089 | -2.095 | -0.015 | 3.62E-02 | 18664 |
| 132 | Tha_IL_R            | 0.206  | 0.107  | 0.306  | 0.051 | 4.062  | 0.030  | 4.88E-05 | 18314 | -0.201 | -0.399  | -0.002 | 0.101 | -1.985 | -0.015 | 4.72E-02 | 18664 |
| 133 | Tha_Re_L            | 0.000  | 0.000  | 0.001  | 0.000 | 1.961  | 0.014  | 4.98E-02 | 18314 | 0.000  | -0.001  | 0.001  | 0.000 | 0.288  | 0.002  | 7.73E-01 | 18664 |
| 134 | Tha_Re_R            | 0.004  | 0.001  | 0.007  | 0.002 | 2.672  | 0.020  | 7.54E-03 | 18314 | -0.003 | -0.009  | 0.003  | 0.003 | -0.933 | -0.007 | 3.51E-01 | 18664 |

|     |           |        |        |       |       |        |        |          |       |        |        |        |       |        |        |          |       |
|-----|-----------|--------|--------|-------|-------|--------|--------|----------|-------|--------|--------|--------|-------|--------|--------|----------|-------|
| 135 | Tha_MDm_L | 1.256  | 0.606  | 1.907 | 0.332 | 3.785  | 0.028  | 1.54E-04 | 18314 | -1.523 | -2.817 | -0.228 | 0.660 | -2.306 | -0.017 | 2.11E-02 | 18664 |
| 136 | Tha_MDm_R | 1.518  | 0.763  | 2.273 | 0.385 | 3.940  | 0.029  | 8.16E-05 | 18314 | -1.691 | -3.195 | -0.186 | 0.768 | -2.202 | -0.016 | 2.77E-02 | 18664 |
| 137 | Tha_MDI_L | 0.229  | 0.116  | 0.342 | 0.057 | 3.986  | 0.029  | 6.74E-05 | 18314 | -0.280 | -0.504 | -0.056 | 0.114 | -2.448 | -0.018 | 1.44E-02 | 18664 |
| 138 | Tha_MDI_R | 0.264  | 0.136  | 0.391 | 0.065 | 4.041  | 0.030  | 5.35E-05 | 18314 | -0.292 | -0.547 | -0.037 | 0.130 | -2.247 | -0.016 | 2.47E-02 | 18664 |
| 139 | Tha_LGN_L | 0.024  | 0.007  | 0.041 | 0.009 | 2.780  | 0.021  | 5.44E-03 | 18314 | -0.016 | -0.050 | 0.018  | 0.017 | -0.923 | -0.007 | 3.56E-01 | 18664 |
| 140 | Tha_LGN_R | 0.073  | 0.037  | 0.110 | 0.019 | 3.952  | 0.029  | 7.80E-05 | 18314 | -0.083 | -0.156 | -0.011 | 0.037 | -2.253 | -0.016 | 2.42E-02 | 18664 |
| 141 | Tha_MGN_L | 0.042  | 0.011  | 0.072 | 0.016 | 2.682  | 0.020  | 7.32E-03 | 18314 | -0.061 | -0.122 | 0.000  | 0.031 | -1.970 | -0.014 | 4.88E-02 | 18664 |
| 142 | Tha_MGN_R | 0.059  | 0.026  | 0.092 | 0.017 | 3.477  | 0.026  | 5.08E-04 | 18314 | -0.072 | -0.138 | -0.006 | 0.034 | -2.130 | -0.016 | 3.32E-02 | 18664 |
| 143 | Tha_PuA_L | 0.057  | 0.021  | 0.093 | 0.018 | 3.074  | 0.023  | 2.11E-03 | 18314 | -0.070 | -0.141 | 0.002  | 0.037 | -1.905 | -0.014 | 5.68E-02 | 18664 |
| 144 | Tha_PuA_R | 0.144  | 0.069  | 0.219 | 0.038 | 3.762  | 0.028  | 1.69E-04 | 18314 | -0.151 | -0.300 | -0.002 | 0.076 | -1.984 | -0.015 | 4.73E-02 | 18664 |
| 145 | Tha_PuM_L | 1.279  | 0.561  | 1.997 | 0.366 | 3.494  | 0.026  | 4.77E-04 | 18314 | -1.127 | -2.550 | 0.297  | 0.726 | -1.551 | -0.011 | 1.21E-01 | 18664 |
| 146 | Tha_PuM_R | 1.656  | 0.763  | 2.550 | 0.456 | 3.634  | 0.027  | 2.80E-04 | 18314 | -1.368 | -3.143 | 0.406  | 0.905 | -1.511 | -0.011 | 1.31E-01 | 18664 |
| 147 | Tha_PuL_L | 0.224  | 0.093  | 0.355 | 0.067 | 3.348  | 0.025  | 8.15E-04 | 18314 | -0.208 | -0.467 | 0.052  | 0.133 | -1.566 | -0.011 | 1.17E-01 | 18664 |
| 148 | Tha_PuL_R | 0.377  | 0.169  | 0.585 | 0.106 | 3.550  | 0.026  | 3.86E-04 | 18314 | -0.366 | -0.779 | 0.048  | 0.211 | -1.734 | -0.013 | 8.29E-02 | 18664 |
| 149 | Tha_PuL_L | 0.018  | -0.018 | 0.054 | 0.018 | 0.996  | 0.007  | 3.19E-01 | 18314 | -0.009 | -0.080 | 0.062  | 0.036 | -0.247 | -0.002 | 8.05E-01 | 18664 |
| 150 | Tha_PuL_R | 0.062  | 0.015  | 0.110 | 0.024 | 2.604  | 0.019  | 9.23E-03 | 18314 | -0.036 | -0.130 | 0.057  | 0.048 | -0.761 | -0.006 | 4.47E-01 | 18664 |
| 151 | ACC_sub_L | -0.010 | -0.422 | 0.401 | 0.210 | -0.049 | 0.000  | 9.61E-01 | 18314 | -0.719 | -1.535 | 0.097  | 0.416 | -1.727 | -0.013 | 8.41E-02 | 18664 |
| 152 | ACC_sub_R | 0.059  | -0.325 | 0.443 | 0.196 | 0.301  | 0.002  | 7.64E-01 | 18314 | -0.602 | -1.364 | 0.161  | 0.389 | -1.546 | -0.011 | 1.22E-01 | 18664 |
| 153 | ACC_pre_L | 0.621  | -0.434 | 1.675 | 0.538 | 1.154  | 0.009  | 2.49E-01 | 18314 | -2.927 | -5.017 | -0.837 | 1.066 | -2.745 | -0.020 | 6.05E-03 | 18664 |
| 154 | ACC_pre_R | 0.521  | -0.494 | 1.537 | 0.518 | 1.006  | 0.007  | 3.14E-01 | 18314 | -2.418 | -4.431 | -0.405 | 1.027 | -2.354 | -0.017 | 1.86E-02 | 18664 |
| 155 | ACC_sup_L | 0.503  | -0.644 | 1.650 | 0.585 | 0.859  | 0.006  | 3.90E-01 | 18314 | -1.904 | -4.177 | 0.369  | 1.160 | -1.642 | -0.012 | 1.01E-01 | 18664 |
| 156 | ACC_sup_R | 0.207  | -0.980 | 1.393 | 0.605 | 0.342  | 0.003  | 7.32E-01 | 18314 | -1.615 | -3.970 | 0.739  | 1.201 | -1.345 | -0.010 | 1.79E-01 | 18664 |
| 157 | N_Acc_L   | 0.404  | 0.060  | 0.748 | 0.176 | 2.304  | 0.017  | 2.13E-02 | 18314 | -0.279 | -0.963 | 0.405  | 0.349 | -0.799 | -0.006 | 4.24E-01 | 18664 |
| 158 | N_Acc_R   | 0.160  | -0.138 | 0.458 | 0.152 | 1.055  | 0.008  | 2.92E-01 | 18314 | -0.330 | -0.922 | 0.261  | 0.302 | -1.095 | -0.008 | 2.74E-01 | 18664 |
| 159 | VTA_L     | 0.008  | -0.004 | 0.020 | 0.006 | 1.256  | 0.009  | 2.09E-01 | 18314 | 0.003  | -0.021 | 0.027  | 0.012 | 0.276  | 0.002  | 7.82E-01 | 18664 |
| 160 | VTA_R     | 0.007  | -0.004 | 0.018 | 0.006 | 1.272  | 0.009  | 2.03E-01 | 18314 | -0.001 | -0.023 | 0.021  | 0.011 | -0.087 | -0.001 | 9.31E-01 | 18664 |
| 161 | SN_pc_L   | 0.006  | -0.014 | 0.026 | 0.010 | 0.603  | 0.004  | 5.47E-01 | 18314 | -0.032 | -0.071 | 0.006  | 0.020 | -1.648 | -0.012 | 9.94E-02 | 18664 |
| 162 | SN_pc_R   | 0.009  | -0.016 | 0.035 | 0.013 | 0.708  | 0.005  | 4.79E-01 | 18314 | -0.035 | -0.086 | 0.015  | 0.026 | -1.368 | -0.010 | 1.71E-01 | 18664 |
| 163 | SN_pr_L   | 0.003  | -0.024 | 0.029 | 0.014 | 0.209  | 0.002  | 8.34E-01 | 18314 | -0.019 | -0.071 | 0.034  | 0.027 | -0.696 | -0.005 | 4.86E-01 | 18664 |
| 164 | SN_pr_R   | 0.003  | -0.026 | 0.033 | 0.015 | 0.216  | 0.002  | 8.29E-01 | 18314 | -0.017 | -0.076 | 0.042  | 0.030 | -0.556 | -0.004 | 5.78E-01 | 18664 |
| 165 | Red_N_L   | 0.033  | 0.001  | 0.066 | 0.017 | 2.003  | 0.015  | 4.52E-02 | 18314 | -0.036 | -0.101 | 0.029  | 0.033 | -1.081 | -0.008 | 2.80E-01 | 18664 |
| 166 | Red_N_R   | 0.027  | -0.008 | 0.063 | 0.018 | 1.508  | 0.011  | 1.31E-01 | 18314 | -0.015 | -0.086 | 0.055  | 0.036 | -0.428 | -0.003 | 6.68E-01 | 18664 |
| 167 | LC_L      | 0.001  | -0.011 | 0.013 | 0.006 | 0.123  | 0.001  | 9.02E-01 | 18314 | 0.015  | -0.009 | 0.039  | 0.012 | 1.207  | 0.009  | 2.28E-01 | 18664 |
| 168 | LC_R      | -0.004 | -0.017 | 0.009 | 0.007 | -0.615 | -0.005 | 5.39E-01 | 18314 | 0.011  | -0.015 | 0.038  | 0.013 | 0.827  | 0.006  | 4.08E-01 | 18664 |
| 169 | Raphe_D   | 0.066  | 0.019  | 0.113 | 0.024 | 2.746  | 0.020  | 6.04E-03 | 18314 | -0.007 | -0.101 | 0.087  | 0.048 | -0.151 | -0.001 | 8.80E-01 | 18664 |
| 170 | Raphe_M   | 0.008  | -0.006 | 0.023 | 0.007 | 1.141  | 0.008  | 2.54E-01 | 18314 | 0.013  | -0.016 | 0.041  | 0.015 | 0.889  | 0.007  | 3.74E-01 | 18664 |

| Bread intake |                    |        |         |         |        |       |       |          |       | Pork intake |          |         |         |        |        |          |       |
|--------------|--------------------|--------|---------|---------|--------|-------|-------|----------|-------|-------------|----------|---------|---------|--------|--------|----------|-------|
| Number       | AAL 3 region       | beta   | 95%CI l | 95%CI h | se     | t     | r     | p        | df.e  | beta        | 95%CI l  | 95%CI h | se      | t      | r      | p        | df.e  |
| 0            | Total brain        | 16.782 | -3.635  | 37.198  | 10.416 | 1.611 | 0.012 | 1.07E-01 | 18371 | -234.354    | -465.599 | -3.108  | 117.977 | -1.986 | -0.015 | 4.70E-02 | 18656 |
| 1            | Precentral_L       | 0.105  | -0.615  | 0.824   | 0.367  | 0.285 | 0.002 | 7.76E-01 | 18371 | -2.089      | -10.235  | 6.058   | 4.156   | -0.502 | -0.004 | 6.15E-01 | 18656 |
| 2            | Precentral_R       | 0.162  | -0.497  | 0.821   | 0.336  | 0.482 | 0.004 | 6.30E-01 | 18371 | -3.443      | -10.904  | 4.018   | 3.806   | -0.904 | -0.007 | 3.66E-01 | 18656 |
| 3            | Frontal_Sup_2_L    | 0.886  | 0.127   | 1.646   | 0.388  | 2.286 | 0.017 | 2.22E-02 | 18371 | -2.165      | -10.768  | 6.438   | 4.389   | -0.493 | -0.004 | 6.22E-01 | 18656 |
| 4            | Frontal_Sup_2_R    | 0.632  | -0.206  | 1.469   | 0.427  | 1.479 | 0.011 | 1.39E-01 | 18371 | -6.947      | -16.430  | 2.536   | 4.838   | -1.436 | -0.011 | 1.51E-01 | 18656 |
| 5            | Frontal_Mid_2_L    | 0.098  | -0.699  | 0.895   | 0.407  | 0.241 | 0.002 | 8.09E-01 | 18371 | -7.211      | -16.243  | 1.820   | 4.607   | -1.565 | -0.011 | 1.18E-01 | 18656 |
| 6            | Frontal_Mid_2_R    | 0.810  | -0.092  | 1.712   | 0.460  | 1.760 | 0.013 | 7.84E-02 | 18371 | -6.625      | -16.845  | 3.596   | 5.214   | -1.270 | -0.009 | 2.04E-01 | 18656 |
| 7            | Frontal_Inf_Oper_L | 0.156  | -0.079  | 0.392   | 0.120  | 1.303 | 0.010 | 1.93E-01 | 18371 | -0.819      | -3.489   | 1.850   | 1.362   | -0.602 | -0.004 | 5.47E-01 | 18656 |
| 8            | Frontal_Inf_Oper_R | 0.251  | -0.044  | 0.547   | 0.151  | 1.666 | 0.012 | 9.57E-02 | 18371 | -2.285      | -5.633   | 1.062   | 1.708   | -1.338 | -0.010 | 1.81E-01 | 18656 |
| 9            | Frontal_Inf_Tri_L  | 0.302  | -0.199  | 0.802   | 0.255  | 1.181 | 0.009 | 2.38E-01 | 18371 | -3.927      | -9.594   | 1.740   | 2.891   | -1.358 | -0.010 | 1.74E-01 | 18656 |
| 10           | Frontal_Inf_Tri_R  | 0.225  | -0.168  | 0.618   | 0.200  | 1.121 | 0.008 | 2.62E-01 | 18371 | -1.025      | -5.477   | 3.426   | 2.271   | -0.452 | -0.003 | 6.52E-01 | 18656 |

|    |                      |        |        |       |       |        |        |          |       |        |         |        |       |        |        |          |       |
|----|----------------------|--------|--------|-------|-------|--------|--------|----------|-------|--------|---------|--------|-------|--------|--------|----------|-------|
| 11 | Frontal_Inf_Orb_2_L  | 0.132  | -0.018 | 0.281 | 0.076 | 1.726  | 0.013  | 8.44E-02 | 18371 | -1.241 | -2.936  | 0.454  | 0.865 | -1.436 | -0.011 | 1.51E-01 | 18656 |
| 12 | Frontal_Inf_Orb_2_R  | 0.092  | -0.065 | 0.248 | 0.080 | 1.148  | 0.008  | 2.51E-01 | 18371 | -1.153 | -2.925  | 0.620  | 0.904 | -1.275 | -0.009 | 2.02E-01 | 18656 |
| 13 | Rolandic_Oper_L      | 0.094  | -0.132 | 0.321 | 0.116 | 0.817  | 0.006  | 4.14E-01 | 18371 | -0.783 | -3.347  | 1.781  | 1.308 | -0.599 | -0.004 | 5.49E-01 | 18656 |
| 14 | Rolandic_Oper_R      | 0.189  | -0.135 | 0.514 | 0.165 | 1.146  | 0.008  | 2.52E-01 | 18371 | -2.643 | -6.312  | 1.026  | 1.872 | -1.412 | -0.010 | 1.58E-01 | 18656 |
| 15 | Supp_Motor_Area_L    | 0.293  | -0.245 | 0.831 | 0.275 | 1.066  | 0.008  | 2.86E-01 | 18371 | 1.029  | -5.064  | 7.122  | 3.109 | 0.331  | 0.002  | 7.41E-01 | 18656 |
| 16 | Supp_Motor_Area_R    | 0.289  | -0.305 | 0.884 | 0.303 | 0.955  | 0.007  | 3.40E-01 | 18371 | -2.636 | -9.370  | 4.097  | 3.435 | -0.768 | -0.006 | 4.43E-01 | 18656 |
| 17 | Olfactory_L          | 0.072  | -0.008 | 0.152 | 0.041 | 1.767  | 0.013  | 7.73E-02 | 18371 | -0.401 | -1.307  | 0.505  | 0.462 | -0.868 | -0.006 | 3.85E-01 | 18656 |
| 18 | Olfactory_R          | 0.075  | -0.005 | 0.155 | 0.041 | 1.839  | 0.014  | 6.59E-02 | 18371 | -0.856 | -1.764  | 0.053  | 0.463 | -1.847 | -0.014 | 6.48E-02 | 18656 |
| 19 | Frontal_Sup_Medial_L | 0.581  | 0.077  | 1.085 | 0.257 | 2.259  | 0.017  | 2.39E-02 | 18371 | -1.693 | -7.405  | 4.020  | 2.914 | -0.581 | -0.004 | 5.61E-01 | 18656 |
| 20 | Frontal_Sup_Medial_R | 0.097  | -0.270 | 0.464 | 0.187 | 0.519  | 0.004  | 6.04E-01 | 18371 | -3.969 | -8.126  | 0.187  | 2.121 | -1.872 | -0.014 | 6.12E-02 | 18656 |
| 21 | Frontal_Med_Orb_L    | 0.140  | -0.049 | 0.328 | 0.096 | 1.454  | 0.011  | 1.46E-01 | 18371 | -1.449 | -3.581  | 0.684  | 1.088 | -1.332 | -0.010 | 1.83E-01 | 18656 |
| 22 | Frontal_Med_Orb_R    | -0.004 | -0.235 | 0.227 | 0.118 | -0.033 | 0.000  | 9.74E-01 | 18371 | -1.237 | -3.859  | 1.384  | 1.337 | -0.925 | -0.007 | 3.55E-01 | 18656 |
| 23 | Rectus_L             | 0.153  | -0.042 | 0.348 | 0.099 | 1.541  | 0.011  | 1.23E-01 | 18371 | -1.628 | -3.836  | 0.580  | 1.126 | -1.445 | -0.011 | 1.48E-01 | 18656 |
| 24 | Rectus_R             | 0.145  | -0.036 | 0.325 | 0.092 | 1.573  | 0.012  | 1.16E-01 | 18371 | -0.768 | -2.811  | 1.274  | 1.042 | -0.737 | -0.005 | 4.61E-01 | 18656 |
| 25 | OFCmed_L             | -0.001 | -0.114 | 0.112 | 0.058 | -0.014 | 0.000  | 9.89E-01 | 18371 | -0.694 | -1.973  | 0.586  | 0.653 | -1.062 | -0.008 | 2.88E-01 | 18656 |
| 26 | OFCmed_R             | 0.054  | -0.078 | 0.185 | 0.067 | 0.799  | 0.006  | 4.24E-01 | 18371 | 0.258  | -1.234  | 1.750  | 0.761 | 0.339  | 0.002  | 7.34E-01 | 18656 |
| 27 | OFCant_L             | -0.045 | -0.176 | 0.085 | 0.067 | -0.679 | -0.005 | 4.97E-01 | 18371 | -0.827 | -2.307  | 0.653  | 0.755 | -1.096 | -0.008 | 2.73E-01 | 18656 |
| 28 | OFCant_R             | 0.094  | -0.078 | 0.267 | 0.088 | 1.071  | 0.008  | 2.84E-01 | 18371 | -0.626 | -2.582  | 1.329  | 0.998 | -0.628 | -0.005 | 5.30E-01 | 18656 |
| 29 | OFCpost_L            | 0.217  | 0.053  | 0.380 | 0.083 | 2.597  | 0.019  | 9.41E-03 | 18371 | -1.148 | -3.000  | 0.705  | 0.945 | -1.214 | -0.009 | 2.25E-01 | 18656 |
| 30 | OFCpost_R            | 0.176  | 0.025  | 0.327 | 0.077 | 2.283  | 0.017  | 2.24E-02 | 18371 | -2.005 | -3.717  | -0.293 | 0.874 | -2.295 | -0.017 | 2.17E-02 | 18656 |
| 31 | OFClat_L             | 0.022  | -0.033 | 0.077 | 0.028 | 0.784  | 0.006  | 4.33E-01 | 18371 | -0.265 | -0.890  | 0.360  | 0.319 | -0.831 | -0.006 | 4.06E-01 | 18656 |
| 32 | OFClat_R             | 0.021  | -0.026 | 0.067 | 0.024 | 0.868  | 0.006  | 3.85E-01 | 18371 | -0.334 | -0.862  | 0.194  | 0.269 | -1.239 | -0.009 | 2.15E-01 | 18656 |
| 33 | Insula_L             | 0.671  | 0.165  | 1.177 | 0.258 | 2.599  | 0.019  | 9.37E-03 | 18371 | -7.378 | -13.105 | -1.651 | 2.922 | -2.525 | -0.018 | 1.16E-02 | 18656 |
| 34 | Insula_R             | 0.699  | 0.206  | 1.192 | 0.251 | 2.781  | 0.021  | 5.42E-03 | 18371 | -6.198 | -11.780 | -0.616 | 2.848 | -2.176 | -0.016 | 2.95E-02 | 18656 |
| 37 | Cingulate_Mid_L      | 0.351  | -0.076 | 0.779 | 0.218 | 1.612  | 0.012  | 1.07E-01 | 18371 | -4.242 | -9.080  | 0.596  | 2.468 | -1.719 | -0.013 | 8.57E-02 | 18656 |
| 38 | Cingulate_Mid_R      | 0.499  | 0.044  | 0.954 | 0.232 | 2.149  | 0.016  | 3.17E-02 | 18371 | -3.892 | -9.051  | 1.266  | 2.632 | -1.479 | -0.011 | 1.39E-01 | 18656 |
| 39 | Cingulate_Post_L     | 0.102  | -0.029 | 0.233 | 0.067 | 1.531  | 0.011  | 1.26E-01 | 18371 | -1.489 | -2.969  | -0.010 | 0.755 | -1.973 | -0.014 | 4.85E-02 | 18656 |
| 40 | Cingulate_Post_R     | 0.031  | -0.042 | 0.103 | 0.037 | 0.836  | 0.006  | 4.03E-01 | 18371 | -0.240 | -1.060  | 0.581  | 0.419 | -0.572 | -0.004 | 5.67E-01 | 18656 |
| 41 | Hippocampus_L        | 0.268  | 0.056  | 0.479 | 0.108 | 2.483  | 0.018  | 1.30E-02 | 18371 | -2.585 | -4.977  | -0.193 | 1.221 | -2.118 | -0.016 | 3.42E-02 | 18656 |
| 42 | Hippocampus_R        | 0.178  | -0.041 | 0.397 | 0.112 | 1.591  | 0.012  | 1.12E-01 | 18371 | -3.828 | -6.307  | -1.349 | 1.265 | -3.027 | -0.022 | 2.48E-03 | 18656 |
| 43 | ParaHippocampal_L    | 0.208  | 0.020  | 0.396 | 0.096 | 2.173  | 0.016  | 2.98E-02 | 18371 | -2.299 | -4.424  | -0.173 | 1.084 | -2.120 | -0.016 | 3.40E-02 | 18656 |
| 44 | ParaHippocampal_R    | 0.284  | 0.047  | 0.520 | 0.121 | 2.348  | 0.017  | 1.89E-02 | 18371 | -4.637 | -7.318  | -1.956 | 1.368 | -3.390 | -0.025 | 7.00E-04 | 18656 |
| 45 | Amygdala_L           | 0.126  | 0.053  | 0.199 | 0.037 | 3.393  | 0.025  | 6.92E-04 | 18371 | -0.492 | -1.318  | 0.334  | 0.421 | -1.168 | -0.009 | 2.43E-01 | 18656 |
| 46 | Amygdala_R           | 0.116  | 0.042  | 0.191 | 0.038 | 3.057  | 0.023  | 2.24E-03 | 18371 | -0.891 | -1.736  | -0.046 | 0.431 | -2.067 | -0.015 | 3.87E-02 | 18656 |
| 47 | Calcarine_L          | -0.159 | -0.855 | 0.538 | 0.355 | -0.446 | -0.003 | 6.55E-01 | 18371 | -0.852 | -8.743  | 7.038  | 4.026 | -0.212 | -0.002 | 8.32E-01 | 18656 |
| 48 | Calcarine_R          | -0.230 | -0.812 | 0.351 | 0.297 | -0.776 | -0.006 | 4.38E-01 | 18371 | -0.888 | -7.484  | 5.708  | 3.365 | -0.264 | -0.002 | 7.92E-01 | 18656 |
| 49 | Cuneus_L             | -0.337 | -0.774 | 0.100 | 0.223 | -1.511 | -0.011 | 1.31E-01 | 18371 | 1.259  | -3.686  | 6.203  | 2.523 | 0.499  | 0.004  | 6.18E-01 | 18656 |
| 50 | Cuneus_R             | -0.131 | -0.465 | 0.203 | 0.170 | -0.771 | -0.006 | 4.41E-01 | 18371 | 0.261  | -3.523  | 4.045  | 1.930 | 0.135  | 0.001  | 8.92E-01 | 18656 |
| 51 | Lingual_L            | -0.046 | -0.465 | 0.373 | 0.214 | -0.216 | -0.002 | 8.29E-01 | 18371 | -0.582 | -5.327  | 4.164  | 2.421 | -0.240 | -0.002 | 8.10E-01 | 18656 |
| 52 | Lingual_R            | 0.109  | -0.329 | 0.548 | 0.224 | 0.489  | 0.004  | 6.25E-01 | 18371 | -1.838 | -6.811  | 3.134  | 2.537 | -0.725 | -0.005 | 4.69E-01 | 18656 |
| 53 | Occipital_Sup_L      | -0.040 | -0.328 | 0.248 | 0.147 | -0.274 | -0.002 | 7.84E-01 | 18371 | -0.870 | -4.131  | 2.392  | 1.664 | -0.523 | -0.004 | 6.01E-01 | 18656 |
| 54 | Occipital_Sup_R      | 0.214  | -0.099 | 0.526 | 0.159 | 1.342  | 0.010  | 1.80E-01 | 18371 | -0.783 | -4.318  | 2.751  | 1.803 | -0.434 | -0.003 | 6.64E-01 | 18656 |
| 55 | Occipital_Mid_L      | 0.279  | -0.396 | 0.954 | 0.344 | 0.811  | 0.006  | 4.18E-01 | 18371 | -1.344 | -8.986  | 6.299  | 3.899 | -0.345 | -0.003 | 7.30E-01 | 18656 |
| 56 | Occipital_Mid_R      | 0.398  | -0.071 | 0.867 | 0.239 | 1.662  | 0.012  | 9.65E-02 | 18371 | -1.061 | -6.381  | 4.259  | 2.714 | -0.391 | -0.003 | 6.96E-01 | 18656 |
| 57 | Occipital_Inf_L      | 0.135  | -0.090 | 0.359 | 0.114 | 1.176  | 0.009  | 2.40E-01 | 18371 | -2.079 | -4.618  | 0.459  | 1.295 | -1.605 | -0.012 | 1.08E-01 | 18656 |
| 58 | Occipital_Inf_R      | 0.362  | 0.103  | 0.621 | 0.132 | 2.738  | 0.020  | 6.19E-03 | 18371 | 0.719  | -2.212  | 3.649  | 1.495 | 0.481  | 0.004  | 6.31E-01 | 18656 |
| 59 | Fusiform_L           | -0.196 | -0.687 | 0.294 | 0.250 | -0.785 | -0.006 | 4.33E-01 | 18371 | -3.653 | -9.205  | 1.900  | 2.833 | -1.289 | -0.009 | 1.97E-01 | 18656 |
| 60 | Fusiform_R           | 0.139  | -0.400 | 0.678 | 0.275 | 0.504  | 0.004  | 6.14E-01 | 18371 | -4.605 | -10.702 | 1.493  | 3.111 | -1.480 | -0.011 | 1.39E-01 | 18656 |
| 61 | Postcentral_L        | 0.213  | -0.525 | 0.952 | 0.377 | 0.567  | 0.004  | 5.71E-01 | 18371 | 0.709  | -7.635  | 9.054  | 4.257 | 0.167  | 0.001  | 8.68E-01 | 18656 |



|     |                      |        |        |       |       |        |        |          |       |         |         |        |       |        |        |          |       |
|-----|----------------------|--------|--------|-------|-------|--------|--------|----------|-------|---------|---------|--------|-------|--------|--------|----------|-------|
| 62  | Postcentral_R        | -0.072 | -0.829 | 0.685 | 0.386 | -0.185 | -0.001 | 8.53E-01 | 18371 | -1.083  | -9.647  | 7.481  | 4.369 | -0.248 | -0.002 | 8.04E-01 | 18656 |
| 63  | Parietal_Sup_L       | -0.004 | -0.430 | 0.421 | 0.217 | -0.021 | 0.000  | 9.83E-01 | 18371 | -0.901  | -5.713  | 3.911  | 2.455 | -0.367 | -0.003 | 7.14E-01 | 18656 |
| 64  | Parietal_Sup_R       | 0.352  | -0.026 | 0.729 | 0.193 | 1.827  | 0.013  | 6.77E-02 | 18371 | -3.874  | -8.141  | 0.393  | 2.177 | -1.780 | -0.013 | 7.52E-02 | 18656 |
| 65  | Parietal_Inf_L       | -0.025 | -0.582 | 0.532 | 0.284 | -0.088 | -0.001 | 9.30E-01 | 18371 | -2.086  | -8.384  | 4.212  | 3.213 | -0.649 | -0.005 | 5.16E-01 | 18656 |
| 66  | Parietal_Inf_R       | -0.002 | -0.362 | 0.359 | 0.184 | -0.009 | 0.000  | 9.93E-01 | 18371 | -0.859  | -4.941  | 3.223  | 2.083 | -0.412 | -0.003 | 6.80E-01 | 18656 |
| 67  | SupraMarginal_L      | 0.189  | -0.137 | 0.515 | 0.166 | 1.134  | 0.008  | 2.57E-01 | 18371 | -2.054  | -5.745  | 1.636  | 1.883 | -1.091 | -0.008 | 2.75E-01 | 18656 |
| 68  | SupraMarginal_R      | 0.206  | -0.255 | 0.667 | 0.235 | 0.876  | 0.006  | 3.81E-01 | 18371 | -3.088  | -8.314  | 2.139  | 2.667 | -1.158 | -0.008 | 2.47E-01 | 18656 |
| 69  | Angular_L            | 0.053  | -0.267 | 0.374 | 0.164 | 0.326  | 0.002  | 7.44E-01 | 18371 | -2.322  | -5.946  | 1.302  | 1.849 | -1.256 | -0.009 | 2.09E-01 | 18656 |
| 70  | Angular_R            | -0.261 | -0.690 | 0.169 | 0.219 | -1.189 | -0.009 | 2.34E-01 | 18371 | -1.299  | -6.163  | 3.564  | 2.481 | -0.524 | -0.004 | 6.01E-01 | 18656 |
| 71  | Precuneus_L          | 0.051  | -0.730 | 0.832 | 0.399 | 0.127  | 0.001  | 8.99E-01 | 18371 | -3.705  | -12.545 | 5.135  | 4.510 | -0.822 | -0.006 | 4.11E-01 | 18656 |
| 72  | Precuneus_R          | 0.061  | -0.634 | 0.757 | 0.355 | 0.173  | 0.001  | 8.63E-01 | 18371 | -3.664  | -11.540 | 4.212  | 4.018 | -0.912 | -0.007 | 3.62E-01 | 18656 |
| 73  | Paracentral_Lobule_L | -0.075 | -0.432 | 0.283 | 0.182 | -0.409 | -0.003 | 6.82E-01 | 18371 | -0.190  | -4.240  | 3.860  | 2.066 | -0.092 | -0.001 | 9.27E-01 | 18656 |
| 74  | Paracentral_Lobule_R | 0.046  | -0.210 | 0.302 | 0.130 | 0.354  | 0.003  | 7.23E-01 | 18371 | 0.941   | -1.961  | 3.842  | 1.480 | 0.635  | 0.005  | 5.25E-01 | 18656 |
| 75  | Caudate_L            | 0.419  | 0.134  | 0.704 | 0.145 | 2.880  | 0.021  | 3.98E-03 | 18371 | -2.544  | -5.778  | 0.691  | 1.650 | -1.542 | -0.011 | 1.23E-01 | 18656 |
| 76  | Caudate_R            | 0.484  | 0.161  | 0.807 | 0.165 | 2.938  | 0.022  | 3.31E-03 | 18371 | -3.450  | -7.112  | 0.211  | 1.868 | -1.847 | -0.014 | 6.47E-02 | 18656 |
| 77  | Putamen_L            | 0.550  | 0.117  | 0.983 | 0.221 | 2.490  | 0.018  | 1.28E-02 | 18371 | -2.174  | -7.084  | 2.736  | 2.505 | -0.868 | -0.006 | 3.85E-01 | 18656 |
| 78  | Putamen_R            | 0.434  | -0.008 | 0.875 | 0.225 | 1.927  | 0.014  | 5.40E-02 | 18371 | -2.791  | -7.791  | 2.208  | 2.551 | -1.094 | -0.008 | 2.74E-01 | 18656 |
| 79  | Pallidum_L           | 0.025  | -0.014 | 0.064 | 0.020 | 1.273  | 0.009  | 2.03E-01 | 18371 | -0.204  | -0.641  | 0.233  | 0.223 | -0.915 | -0.007 | 3.60E-01 | 18656 |
| 80  | Pallidum_R           | 0.034  | -0.009 | 0.076 | 0.022 | 1.555  | 0.011  | 1.20E-01 | 18371 | -0.364  | -0.844  | 0.115  | 0.245 | -1.490 | -0.011 | 1.36E-01 | 18656 |
| 83  | Heschl_L             | 0.046  | -0.033 | 0.124 | 0.040 | 1.142  | 0.008  | 2.53E-01 | 18371 | -0.381  | -1.266  | 0.504  | 0.451 | -0.844 | -0.006 | 3.99E-01 | 18656 |
| 84  | Heschl_R             | 0.049  | -0.039 | 0.136 | 0.045 | 1.089  | 0.008  | 2.76E-01 | 18371 | -1.030  | -2.019  | -0.041 | 0.505 | -2.041 | -0.015 | 4.12E-02 | 18656 |
| 85  | Temporal_Sup_L       | 0.847  | 0.282  | 1.411 | 0.288 | 2.940  | 0.022  | 3.29E-03 | 18371 | -5.581  | -11.967 | 0.806  | 3.258 | -1.713 | -0.013 | 8.68E-02 | 18656 |
| 86  | Temporal_Sup_R       | 0.407  | -0.217 | 1.031 | 0.318 | 1.278  | 0.009  | 2.01E-01 | 18371 | -7.445  | -14.510 | -0.380 | 3.605 | -2.065 | -0.015 | 3.89E-02 | 18656 |
| 87  | Temporal_Pole_Sup_L  | 0.371  | 0.105  | 0.638 | 0.136 | 2.729  | 0.020  | 6.36E-03 | 18371 | -3.372  | -6.397  | -0.347 | 1.543 | -2.185 | -0.016 | 2.89E-02 | 18656 |
| 88  | Temporal_Pole_Sup_R  | 0.483  | 0.202  | 0.764 | 0.143 | 3.370  | 0.025  | 7.53E-04 | 18371 | -3.867  | -7.051  | -0.683 | 1.624 | -2.381 | -0.017 | 1.73E-02 | 18656 |
| 89  | Temporal_Mid_L       | 0.240  | -0.700 | 1.180 | 0.480 | 0.501  | 0.004  | 6.17E-01 | 18371 | -13.626 | -24.269 | -2.984 | 5.430 | -2.510 | -0.018 | 1.21E-02 | 18656 |
| 90  | Temporal_Mid_R       | 0.406  | -0.430 | 1.242 | 0.427 | 0.952  | 0.007  | 3.41E-01 | 18371 | -5.832  | -15.278 | 3.614  | 4.819 | -1.210 | -0.009 | 2.26E-01 | 18656 |
| 91  | Temporal_Pole_Mid_L  | 0.097  | -0.128 | 0.321 | 0.114 | 0.845  | 0.006  | 3.98E-01 | 18371 | -2.832  | -5.376  | -0.288 | 1.298 | -2.182 | -0.016 | 2.91E-02 | 18656 |
| 92  | Temporal_Pole_Mid_R  | 0.360  | 0.088  | 0.633 | 0.139 | 2.590  | 0.019  | 9.60E-03 | 18371 | -3.182  | -6.272  | -0.091 | 1.577 | -2.018 | -0.015 | 4.36E-02 | 18656 |
| 93  | Temporal_Inf_L       | -0.265 | -0.912 | 0.382 | 0.330 | -0.802 | -0.006 | 4.23E-01 | 18371 | -6.230  | -13.544 | 1.084  | 3.731 | -1.670 | -0.012 | 9.50E-02 | 18656 |
| 94  | Temporal_Inf_R       | 0.307  | -0.399 | 1.012 | 0.360 | 0.852  | 0.006  | 3.94E-01 | 18371 | -2.722  | -10.706 | 5.262  | 4.073 | -0.668 | -0.005 | 5.04E-01 | 18656 |
| 95  | Cerebellum_Crus1_L   | -0.415 | -1.183 | 0.352 | 0.392 | -1.061 | -0.008 | 2.89E-01 | 18371 | -1.093  | -9.793  | 7.606  | 4.438 | -0.246 | -0.002 | 8.05E-01 | 18656 |
| 96  | Cerebellum_Crus1_R   | -0.301 | -1.084 | 0.482 | 0.399 | -0.753 | -0.006 | 4.51E-01 | 18371 | 2.093   | -6.779  | 10.966 | 4.527 | 0.462  | 0.003  | 6.44E-01 | 18656 |
| 97  | Cerebellum_Crus2_L   | -0.102 | -0.711 | 0.507 | 0.311 | -0.329 | -0.002 | 7.42E-01 | 18371 | -5.931  | -12.830 | 0.967  | 3.519 | -1.685 | -0.012 | 9.19E-02 | 18656 |
| 98  | Cerebellum_Crus2_R   | 0.001  | -0.561 | 0.564 | 0.287 | 0.005  | 0.000  | 9.96E-01 | 18371 | -2.641  | -9.023  | 3.741  | 3.256 | -0.811 | -0.006 | 4.17E-01 | 18656 |
| 99  | Cerebellum_3_L       | 0.030  | -0.011 | 0.070 | 0.021 | 1.419  | 0.010  | 1.56E-01 | 18371 | 0.359   | -0.105  | 0.822  | 0.236 | 1.517  | 0.011  | 1.29E-01 | 18656 |
| 100 | Cerebellum_3_R       | 0.029  | -0.027 | 0.084 | 0.028 | 1.015  | 0.007  | 3.10E-01 | 18371 | 0.295   | -0.330  | 0.920  | 0.319 | 0.925  | 0.007  | 3.55E-01 | 18656 |
| 101 | Cerebellum_4_5_L     | 0.088  | -0.242 | 0.419 | 0.169 | 0.524  | 0.004  | 6.00E-01 | 18371 | 3.527   | -0.221  | 7.274  | 1.912 | 1.845  | 0.014  | 6.51E-02 | 18656 |
| 102 | Cerebellum_4_5_R     | 0.169  | -0.100 | 0.438 | 0.137 | 1.232  | 0.009  | 2.18E-01 | 18371 | 2.005   | -1.048  | 5.057  | 1.557 | 1.287  | 0.009  | 1.98E-01 | 18656 |
| 103 | Cerebellum_6_L       | -0.390 | -0.962 | 0.181 | 0.291 | -1.340 | -0.010 | 1.80E-01 | 18371 | 0.075   | -6.401  | 6.551  | 3.304 | 0.023  | 0.000  | 9.82E-01 | 18656 |
| 104 | Cerebellum_6_R       | -0.195 | -0.797 | 0.407 | 0.307 | -0.636 | -0.005 | 5.24E-01 | 18371 | 2.503   | -4.319  | 9.325  | 3.481 | 0.719  | 0.005  | 4.72E-01 | 18656 |
| 105 | Cerebellum_7b_L      | -0.061 | -0.247 | 0.125 | 0.095 | -0.642 | -0.005 | 5.21E-01 | 18371 | -1.233  | -3.341  | 0.876  | 1.076 | -1.146 | -0.008 | 2.52E-01 | 18656 |
| 106 | Cerebellum_7b_R      | -0.012 | -0.196 | 0.172 | 0.094 | -0.127 | -0.001 | 8.99E-01 | 18371 | -1.668  | -3.758  | 0.422  | 1.066 | -1.565 | -0.011 | 1.18E-01 | 18656 |
| 107 | Cerebellum_8_L       | -0.143 | -0.733 | 0.447 | 0.301 | -0.475 | -0.004 | 6.35E-01 | 18371 | -2.409  | -9.104  | 4.286  | 3.415 | -0.705 | -0.005 | 4.81E-01 | 18656 |
| 108 | Cerebellum_8_R       | 0.113  | -0.655 | 0.882 | 0.392 | 0.288  | 0.002  | 7.73E-01 | 18371 | -4.257  | -12.971 | 4.458  | 4.446 | -0.957 | -0.007 | 3.38E-01 | 18656 |
| 109 | Cerebellum_9_L       | -0.025 | -0.359 | 0.308 | 0.170 | -0.148 | -0.001 | 8.83E-01 | 18371 | -2.030  | -5.817  | 1.756  | 1.932 | -1.051 | -0.008 | 2.93E-01 | 18656 |
| 110 | Cerebellum_9_R       | 0.081  | -0.247 | 0.409 | 0.167 | 0.484  | 0.004  | 6.29E-01 | 18371 | -1.150  | -4.872  | 2.572  | 1.899 | -0.606 | -0.004 | 5.45E-01 | 18656 |
| 111 | Cerebellum_10_L      | 0.015  | -0.009 | 0.039 | 0.012 | 1.233  | 0.009  | 2.18E-01 | 18371 | 0.085   | -0.184  | 0.354  | 0.137 | 0.622  | 0.005  | 5.34E-01 | 18656 |
| 112 | Cerebellum_10_R      | 0.023  | -0.002 | 0.048 | 0.013 | 1.831  | 0.014  | 6.71E-02 | 18371 | 0.199   | -0.080  | 0.479  | 0.143 | 1.399  | 0.010  | 1.62E-01 | 18656 |

|     |            |        |        |       |       |        |        |          |       |        |        |        |       |        |        |          |       |
|-----|------------|--------|--------|-------|-------|--------|--------|----------|-------|--------|--------|--------|-------|--------|--------|----------|-------|
| 113 | Vermis_1_2 | 0.014  | -0.001 | 0.030 | 0.008 | 1.840  | 0.014  | 6.58E-02 | 18371 | 0.042  | -0.133 | 0.217  | 0.089 | 0.469  | 0.003  | 6.39E-01 | 18656 |
| 114 | Vermis_3   | 0.064  | 0.002  | 0.125 | 0.031 | 2.033  | 0.015  | 4.21E-02 | 18371 | 0.213  | -0.482 | 0.907  | 0.354 | 0.600  | 0.004  | 5.48E-01 | 18656 |
| 115 | Vermis_4_5 | 0.149  | -0.031 | 0.329 | 0.092 | 1.618  | 0.012  | 1.06E-01 | 18371 | 2.281  | 0.241  | 4.322  | 1.041 | 2.192  | 0.016  | 2.84E-02 | 18656 |
| 116 | Vermis_6   | -0.011 | -0.111 | 0.090 | 0.051 | -0.210 | -0.002 | 8.34E-01 | 18371 | 0.430  | -0.706 | 1.567  | 0.580 | 0.742  | 0.005  | 4.58E-01 | 18656 |
| 117 | Vermis_7   | -0.017 | -0.074 | 0.040 | 0.029 | -0.587 | -0.004 | 5.57E-01 | 18371 | 0.102  | -0.540 | 0.744  | 0.328 | 0.310  | 0.002  | 7.56E-01 | 18656 |
| 118 | Vermis_8   | -0.044 | -0.137 | 0.049 | 0.047 | -0.922 | -0.007 | 3.57E-01 | 18371 | -0.493 | -1.548 | 0.563  | 0.538 | -0.915 | -0.007 | 3.60E-01 | 18656 |
| 119 | Vermis_9   | 0.000  | -0.075 | 0.076 | 0.038 | 0.006  | 0.000  | 9.96E-01 | 18371 | -0.207 | -1.062 | 0.648  | 0.436 | -0.474 | -0.003 | 6.35E-01 | 18656 |
| 120 | Vermis_10  | 0.012  | -0.009 | 0.033 | 0.011 | 1.122  | 0.008  | 2.62E-01 | 18371 | -0.050 | -0.288 | 0.189  | 0.122 | -0.409 | -0.003 | 6.83E-01 | 18656 |
| 121 | Tha_AV_L   | 0.008  | 0.000  | 0.017 | 0.004 | 1.968  | 0.015  | 4.91E-02 | 18371 | -0.065 | -0.161 | 0.030  | 0.049 | -1.342 | -0.010 | 1.80E-01 | 18656 |
| 122 | Tha_AV_R   | 0.007  | -0.005 | 0.019 | 0.006 | 1.109  | 0.008  | 2.67E-01 | 18371 | -0.120 | -0.256 | 0.017  | 0.070 | -1.718 | -0.013 | 8.59E-02 | 18656 |
| 123 | Tha_LP_L   | 0.012  | 0.003  | 0.021 | 0.005 | 2.520  | 0.019  | 1.17E-02 | 18371 | -0.085 | -0.191 | 0.020  | 0.054 | -1.582 | -0.012 | 1.14E-01 | 18656 |
| 124 | Tha_LP_R   | 0.006  | -0.006 | 0.018 | 0.006 | 0.979  | 0.007  | 3.27E-01 | 18371 | -0.172 | -0.310 | -0.034 | 0.070 | -2.451 | -0.018 | 1.43E-02 | 18656 |
| 125 | Tha_VA_L   | 0.007  | -0.003 | 0.017 | 0.005 | 1.336  | 0.010  | 1.82E-01 | 18371 | -0.060 | -0.172 | 0.053  | 0.058 | -1.035 | -0.008 | 3.01E-01 | 18656 |
| 126 | Tha_VA_R   | 0.005  | -0.007 | 0.017 | 0.006 | 0.821  | 0.006  | 4.12E-01 | 18371 | -0.099 | -0.237 | 0.040  | 0.071 | -1.397 | -0.010 | 1.63E-01 | 18656 |
| 127 | Tha_VL_L   | 0.051  | 0.023  | 0.079 | 0.014 | 3.523  | 0.026  | 4.28E-04 | 18371 | -0.243 | -0.564 | 0.078  | 0.164 | -1.484 | -0.011 | 1.38E-01 | 18656 |
| 128 | Tha_VL_R   | 0.038  | 0.000  | 0.075 | 0.019 | 1.962  | 0.014  | 4.98E-02 | 18371 | -0.483 | -0.909 | -0.056 | 0.218 | -2.216 | -0.016 | 2.67E-02 | 18656 |
| 129 | Tha_VPL_L  | 0.037  | 0.003  | 0.071 | 0.017 | 2.136  | 0.016  | 3.27E-02 | 18371 | -0.283 | -0.665 | 0.100  | 0.195 | -1.449 | -0.011 | 1.47E-01 | 18656 |
| 130 | Tha_VPL_R  | 0.019  | -0.017 | 0.054 | 0.018 | 1.039  | 0.008  | 2.99E-01 | 18371 | -0.359 | -0.761 | 0.044  | 0.205 | -1.748 | -0.013 | 8.05E-02 | 18656 |
| 131 | Tha_IL_L   | 0.021  | 0.006  | 0.036 | 0.007 | 2.818  | 0.021  | 4.83E-03 | 18371 | -0.277 | -0.443 | -0.112 | 0.084 | -3.283 | -0.024 | 1.03E-03 | 18656 |
| 132 | Tha_IL_R   | 0.015  | -0.002 | 0.031 | 0.008 | 1.742  | 0.013  | 8.15E-02 | 18371 | -0.260 | -0.448 | -0.073 | 0.096 | -2.720 | -0.020 | 6.54E-03 | 18656 |
| 133 | Tha_Re_L   | 0.000  | 0.000  | 0.000 | 0.000 | 0.526  | 0.004  | 5.99E-01 | 18371 | 0.000  | -0.001 | 0.001  | 0.000 | -0.349 | -0.003 | 7.27E-01 | 18656 |
| 134 | Tha_Re_R   | 0.000  | 0.000  | 0.001 | 0.000 | 0.984  | 0.007  | 3.25E-01 | 18371 | -0.004 | -0.010 | 0.001  | 0.003 | -1.463 | -0.011 | 1.44E-01 | 18656 |
| 135 | Tha_MDm_L  | 0.121  | 0.013  | 0.229 | 0.055 | 2.200  | 0.016  | 2.78E-02 | 18371 | -1.650 | -2.875 | -0.424 | 0.625 | -2.638 | -0.019 | 8.34E-03 | 18656 |
| 136 | Tha_MDm_R  | 0.097  | -0.029 | 0.222 | 0.064 | 1.510  | 0.011  | 1.31E-01 | 18371 | -1.740 | -3.164 | -0.316 | 0.726 | -2.395 | -0.018 | 1.66E-02 | 18656 |
| 137 | Tha_MDI_L  | 0.027  | 0.009  | 0.046 | 0.010 | 2.864  | 0.021  | 4.18E-03 | 18371 | -0.288 | -0.500 | -0.076 | 0.108 | -2.663 | -0.019 | 7.76E-03 | 18656 |
| 138 | Tha_MDI_R  | 0.018  | -0.003 | 0.040 | 0.011 | 1.686  | 0.012  | 9.18E-02 | 18371 | -0.302 | -0.543 | -0.061 | 0.123 | -2.454 | -0.018 | 1.41E-02 | 18656 |
| 139 | Tha_LGN_L  | 0.002  | -0.001 | 0.005 | 0.001 | 1.371  | 0.010  | 1.70E-01 | 18371 | -0.042 | -0.074 | -0.010 | 0.016 | -2.565 | -0.019 | 1.03E-02 | 18656 |
| 140 | Tha_LGN_R  | 0.006  | 0.000  | 0.012 | 0.003 | 1.943  | 0.014  | 5.20E-02 | 18371 | -0.109 | -0.177 | -0.040 | 0.035 | -3.102 | -0.023 | 1.92E-03 | 18656 |
| 141 | Tha_MGN_L  | 0.003  | -0.002 | 0.008 | 0.003 | 1.288  | 0.010  | 1.98E-01 | 18371 | -0.078 | -0.135 | -0.020 | 0.029 | -2.658 | -0.019 | 7.86E-03 | 18656 |
| 142 | Tha_MGN_R  | 0.004  | -0.002 | 0.009 | 0.003 | 1.332  | 0.010  | 1.83E-01 | 18371 | -0.098 | -0.161 | -0.036 | 0.032 | -3.085 | -0.023 | 2.04E-03 | 18656 |
| 143 | Tha_PuA_L  | 0.005  | -0.001 | 0.011 | 0.003 | 1.591  | 0.012  | 1.12E-01 | 18371 | -0.109 | -0.177 | -0.041 | 0.035 | -3.148 | -0.023 | 1.65E-03 | 18656 |
| 144 | Tha_PuA_R  | 0.009  | -0.003 | 0.021 | 0.006 | 1.411  | 0.010  | 1.58E-01 | 18371 | -0.225 | -0.366 | -0.084 | 0.072 | -3.122 | -0.023 | 1.80E-03 | 18656 |
| 145 | Tha_PuM_L  | 0.092  | -0.027 | 0.211 | 0.061 | 1.519  | 0.011  | 1.29E-01 | 18371 | -1.590 | -2.939 | -0.241 | 0.688 | -2.311 | -0.017 | 2.09E-02 | 18656 |
| 146 | Tha_PuM_R  | 0.095  | -0.053 | 0.244 | 0.076 | 1.257  | 0.009  | 2.09E-01 | 18371 | -2.223 | -3.904 | -0.543 | 0.857 | -2.593 | -0.019 | 9.51E-03 | 18656 |
| 147 | Tha_PuL_L  | 0.019  | -0.002 | 0.041 | 0.011 | 1.757  | 0.013  | 7.89E-02 | 18371 | -0.286 | -0.532 | -0.040 | 0.126 | -2.279 | -0.017 | 2.27E-02 | 18656 |
| 148 | Tha_PuL_R  | 0.020  | -0.015 | 0.054 | 0.018 | 1.117  | 0.008  | 2.64E-01 | 18371 | -0.473 | -0.864 | -0.082 | 0.200 | -2.369 | -0.017 | 1.79E-02 | 18656 |
| 149 | Tha_PuL_L  | 0.003  | -0.003 | 0.009 | 0.003 | 1.012  | 0.007  | 3.12E-01 | 18371 | -0.016 | -0.083 | 0.051  | 0.034 | -0.460 | -0.003 | 6.46E-01 | 18656 |
| 150 | Tha_PuL_R  | 0.002  | -0.006 | 0.009 | 0.004 | 0.379  | 0.003  | 7.05E-01 | 18371 | -0.067 | -0.156 | 0.022  | 0.045 | -1.483 | -0.011 | 1.38E-01 | 18656 |
| 151 | ACC_sub_L  | -0.023 | -0.092 | 0.045 | 0.035 | -0.668 | -0.005 | 5.04E-01 | 18371 | -0.404 | -1.176 | 0.368  | 0.394 | -1.026 | -0.008 | 3.05E-01 | 18656 |
| 152 | ACC_sub_R  | -0.008 | -0.072 | 0.056 | 0.033 | -0.253 | -0.002 | 8.00E-01 | 18371 | -0.427 | -1.149 | 0.295  | 0.368 | -1.160 | -0.008 | 2.46E-01 | 18656 |
| 153 | ACC_pre_L  | 0.004  | -0.170 | 0.179 | 0.089 | 0.047  | 0.000  | 9.63E-01 | 18371 | -1.327 | -3.305 | 0.651  | 1.009 | -1.315 | -0.010 | 1.88E-01 | 18656 |
| 154 | ACC_pre_R  | 0.050  | -0.118 | 0.218 | 0.086 | 0.581  | 0.004  | 5.61E-01 | 18371 | -1.367 | -3.273 | 0.539  | 0.972 | -1.406 | -0.010 | 1.60E-01 | 18656 |
| 155 | ACC_sup_L  | 0.133  | -0.057 | 0.323 | 0.097 | 1.372  | 0.010  | 1.70E-01 | 18371 | -0.628 | -2.777 | 1.522  | 1.097 | -0.572 | -0.004 | 5.67E-01 | 18656 |
| 156 | ACC_sup_R  | 0.058  | -0.138 | 0.255 | 0.100 | 0.581  | 0.004  | 5.61E-01 | 18371 | -1.084 | -3.313 | 1.145  | 1.137 | -0.953 | -0.007 | 3.40E-01 | 18656 |
| 157 | N_Acc_L    | 0.080  | 0.023  | 0.137 | 0.029 | 2.753  | 0.020  | 5.91E-03 | 18371 | -0.422 | -1.069 | 0.225  | 0.330 | -1.278 | -0.009 | 2.01E-01 | 18656 |
| 158 | N_Acc_R    | 0.058  | 0.009  | 0.107 | 0.025 | 2.308  | 0.017  | 2.10E-02 | 18371 | -0.561 | -1.121 | -0.001 | 0.286 | -1.965 | -0.014 | 4.95E-02 | 18656 |
| 159 | VTA_L      | 0.001  | -0.001 | 0.003 | 0.001 | 0.977  | 0.007  | 3.29E-01 | 18371 | 0.006  | -0.017 | 0.029  | 0.012 | 0.498  | 0.004  | 6.18E-01 | 18656 |
| 160 | VTA_R      | 0.001  | -0.001 | 0.003 | 0.001 | 1.021  | 0.008  | 3.07E-01 | 18371 | 0.002  | -0.018 | 0.023  | 0.010 | 0.202  | 0.001  | 8.40E-01 | 18656 |
| 161 | SN_pc_L    | 0.002  | -0.001 | 0.006 | 0.002 | 1.381  | 0.010  | 1.67E-01 | 18371 | -0.012 | -0.049 | 0.024  | 0.019 | -0.665 | -0.005 | 5.06E-01 | 18656 |

|     |         |       |        |       |       |       |       |          |       |        |        |       |       |        |        |          |       |
|-----|---------|-------|--------|-------|-------|-------|-------|----------|-------|--------|--------|-------|-------|--------|--------|----------|-------|
| 162 | SN_pc_R | 0.005 | 0.001  | 0.009 | 0.002 | 2.379 | 0.018 | 1.73E-02 | 18371 | -0.035 | -0.083 | 0.013 | 0.024 | -1.432 | -0.010 | 1.52E-01 | 18656 |
| 163 | SN_pr_L | 0.005 | 0.000  | 0.009 | 0.002 | 2.039 | 0.015 | 4.15E-02 | 18371 | -0.022 | -0.071 | 0.028 | 0.025 | -0.861 | -0.006 | 3.90E-01 | 18656 |
| 164 | SN_pr_R | 0.008 | 0.003  | 0.013 | 0.003 | 3.049 | 0.022 | 2.30E-03 | 18371 | -0.049 | -0.104 | 0.007 | 0.028 | -1.708 | -0.013 | 8.76E-02 | 18656 |
| 165 | Red_N_L | 0.004 | -0.001 | 0.009 | 0.003 | 1.469 | 0.011 | 1.42E-01 | 18371 | -0.039 | -0.100 | 0.023 | 0.031 | -1.238 | -0.009 | 2.16E-01 | 18656 |
| 166 | Red_N_R | 0.005 | -0.001 | 0.011 | 0.003 | 1.705 | 0.013 | 8.83E-02 | 18371 | -0.016 | -0.083 | 0.051 | 0.034 | -0.476 | -0.003 | 6.34E-01 | 18656 |
| 167 | LC_L    | 0.002 | 0.000  | 0.004 | 0.001 | 1.780 | 0.013 | 7.50E-02 | 18371 | 0.007  | -0.016 | 0.030 | 0.012 | 0.607  | 0.004  | 5.44E-01 | 18656 |
| 168 | LC_R    | 0.002 | 0.000  | 0.004 | 0.001 | 1.647 | 0.012 | 9.96E-02 | 18371 | 0.008  | -0.017 | 0.033 | 0.013 | 0.618  | 0.005  | 5.36E-01 | 18656 |
| 169 | Raphe_D | 0.005 | -0.003 | 0.012 | 0.004 | 1.131 | 0.008 | 2.58E-01 | 18371 | -0.039 | -0.128 | 0.050 | 0.045 | -0.855 | -0.006 | 3.93E-01 | 18656 |
| 170 | Raphe_M | 0.002 | 0.000  | 0.004 | 0.001 | 1.726 | 0.013 | 8.44E-02 | 18371 | 0.009  | -0.018 | 0.036 | 0.014 | 0.688  | 0.005  | 4.92E-01 | 18656 |

| Oily fish intake |                     |          |          |         |        |        |        |          |       | Cheese intake |         |         |        |        |        |          |       |
|------------------|---------------------|----------|----------|---------|--------|--------|--------|----------|-------|---------------|---------|---------|--------|--------|--------|----------|-------|
| Number           | AAL 3 region        | beta     | 95%CI l  | 95%CI h | se     | t      | r      | p        | df.e  | beta          | 95%CI l | 95%CI h | se     | t      | r      | p        | df.e  |
| 0                | Total brain         | -237.794 | -423.876 | -51.711 | 94.936 | -2.505 | -0.018 | 1.23E-02 | 18696 | 63.960        | -91.971 | 219.890 | 79.553 | 0.804  | 0.006  | 4.21E-01 | 18245 |
| 1                | Precentral_L        | -3.397   | -9.944   | 3.150   | 3.340  | -1.017 | -0.007 | 3.09E-01 | 18696 | 0.909         | -4.570  | 6.388   | 2.795  | 0.325  | 0.002  | 7.45E-01 | 18245 |
| 2                | Precentral_R        | -3.944   | -9.945   | 2.057   | 3.062  | -1.288 | -0.009 | 1.98E-01 | 18696 | 1.176         | -3.841  | 6.194   | 2.560  | 0.459  | 0.003  | 6.46E-01 | 18245 |
| 3                | Frontal_Sup_2_L     | -6.332   | -13.247  | 0.582   | 3.528  | -1.795 | -0.013 | 7.27E-02 | 18696 | 3.333         | -2.454  | 9.120   | 2.952  | 1.129  | 0.008  | 2.59E-01 | 18245 |
| 4                | Frontal_Sup_2_R     | -6.144   | -13.765  | 1.476   | 3.888  | -1.581 | -0.012 | 1.14E-01 | 18696 | 2.023         | -4.363  | 8.410   | 3.258  | 0.621  | 0.005  | 5.35E-01 | 18245 |
| 5                | Frontal_Mid_2_L     | -4.111   | -11.372  | 3.149   | 3.704  | -1.110 | -0.008 | 2.67E-01 | 18696 | 3.539         | -2.548  | 9.627   | 3.106  | 1.140  | 0.008  | 2.54E-01 | 18245 |
| 6                | Frontal_Mid_2_R     | -6.958   | -15.177  | 1.261   | 4.193  | -1.659 | -0.012 | 9.70E-02 | 18696 | -0.205        | -7.084  | 6.674   | 3.509  | -0.058 | 0.000  | 9.53E-01 | 18245 |
| 7                | Frontal_Inf_Oper_L  | -2.156   | -4.300   | -0.011  | 1.094  | -1.970 | -0.014 | 4.88E-02 | 18696 | 1.590         | -0.207  | 3.386   | 0.917  | 1.734  | 0.013  | 8.29E-02 | 18245 |
| 8                | Frontal_Inf_Oper_R  | -1.688   | -4.378   | 1.002   | 1.372  | -1.230 | -0.009 | 2.19E-01 | 18696 | 2.529         | 0.273   | 4.784   | 1.151  | 2.197  | 0.016  | 2.80E-02 | 18245 |
| 9                | Frontal_Inf_Tri_L   | -3.606   | -8.161   | 0.950   | 2.324  | -1.551 | -0.011 | 1.21E-01 | 18696 | 5.234         | 1.417   | 9.052   | 1.948  | 2.687  | 0.020  | 7.21E-03 | 18245 |
| 10               | Frontal_Inf_Tri_R   | -0.187   | -3.766   | 3.391   | 1.826  | -0.103 | -0.001 | 9.18E-01 | 18696 | 4.945         | 1.944   | 7.947   | 1.531  | 3.229  | 0.024  | 1.24E-03 | 18245 |
| 11               | Frontal_Inf_Orb_2_L | -1.284   | -2.646   | 0.078   | 0.695  | -1.848 | -0.014 | 6.46E-02 | 18696 | 1.872         | 0.729   | 3.015   | 0.583  | 3.211  | 0.024  | 1.33E-03 | 18245 |
| 12               | Frontal_Inf_Orb_2_R | -2.641   | -2.066   | 0.783   | 0.727  | -0.882 | -0.006 | 3.78E-01 | 18696 | 2.247         | 1.053   | 3.441   | 0.609  | 3.688  | 0.027  | 2.26E-04 | 18245 |
| 13               | Rolandic_Oper_L     | -3.027   | -5.087   | -0.968  | 1.051  | -2.882 | -0.021 | 3.96E-03 | 18696 | 1.692         | -0.035  | 3.420   | 0.882  | 1.920  | 0.014  | 5.49E-02 | 18245 |
| 14               | Rolandic_Oper_R     | -1.698   | -4.646   | 1.249   | 1.504  | -1.129 | -0.008 | 2.59E-01 | 18696 | 1.402         | -1.071  | 3.876   | 1.262  | 1.111  | 0.008  | 2.67E-01 | 18245 |
| 15               | Supp_Motor_Area_L   | -0.938   | -5.835   | 3.959   | 2.499  | -0.375 | -0.003 | 7.07E-01 | 18696 | -1.282        | -5.381  | 2.818   | 2.091  | -0.613 | -0.005 | 5.40E-01 | 18245 |
| 16               | Supp_Motor_Area_R   | 1.556    | -3.857   | 6.969   | 2.762  | 0.563  | 0.004  | 5.73E-01 | 18696 | -0.604        | -5.135  | 3.927   | 2.312  | -0.261 | -0.002 | 7.94E-01 | 18245 |
| 17               | Olfactory_L         | -0.395   | -1.123   | 0.333   | 0.371  | -1.063 | -0.008 | 2.88E-01 | 18696 | 0.574         | -0.037  | 1.185   | 0.312  | 1.841  | 0.014  | 6.56E-02 | 18245 |
| 18               | Olfactory_R         | -0.229   | -0.959   | 0.501   | 0.372  | -0.616 | -0.005 | 5.38E-01 | 18696 | 0.818         | 0.206   | 1.430   | 0.312  | 2.619  | 0.019  | 8.82E-03 | 18245 |
| 19               | Frontal_Sup_Media_L | -1.417   | -6.009   | 3.174   | 2.342  | -0.605 | -0.004 | 5.45E-01 | 18696 | 3.438         | -0.409  | 7.286   | 1.963  | 1.752  | 0.013  | 7.99E-02 | 18245 |
| 20               | Frontal_Sup_Media_R | -1.306   | -4.648   | 2.036   | 1.705  | -0.766 | -0.006 | 4.44E-01 | 18696 | 0.804         | -1.997  | 3.604   | 1.429  | 0.562  | 0.004  | 5.74E-01 | 18245 |
| 21               | Frontal_Med_Orb_L   | -1.228   | -2.943   | 0.488   | 0.875  | -1.403 | -0.010 | 1.61E-01 | 18696 | 0.864         | -0.574  | 2.302   | 0.734  | 1.177  | 0.009  | 2.39E-01 | 18245 |
| 22               | Frontal_Med_Orb_R   | -1.476   | -3.584   | 0.632   | 1.076  | -1.372 | -0.010 | 1.70E-01 | 18696 | 1.317         | -0.449  | 3.084   | 0.901  | 1.462  | 0.011  | 1.44E-01 | 18245 |
| 23               | Rectus_L            | -2.165   | -3.939   | -0.390  | 0.906  | -2.390 | -0.017 | 1.68E-02 | 18696 | 1.469         | -0.020  | 2.957   | 0.759  | 1.934  | 0.014  | 5.31E-02 | 18245 |
| 24               | Rectus_R            | -1.447   | -3.088   | 0.195   | 0.838  | -1.727 | -0.013 | 8.41E-02 | 18696 | 1.678         | 0.302   | 3.055   | 0.702  | 2.389  | 0.018  | 1.69E-02 | 18245 |
| 25               | OFCmed_L            | -1.115   | -2.144   | -0.087  | 0.525  | -2.125 | -0.016 | 3.36E-02 | 18696 | 0.171         | -0.692  | 1.034   | 0.441  | 0.388  | 0.003  | 6.98E-01 | 18245 |
| 26               | OFCmed_R            | -0.422   | -1.620   | 0.777   | 0.611  | -0.690 | -0.005 | 4.90E-01 | 18696 | 0.137         | -0.868  | 1.143   | 0.513  | 0.268  | 0.002  | 7.89E-01 | 18245 |
| 27               | OFCant_L            | -0.992   | -2.182   | 0.197   | 0.607  | -1.635 | -0.012 | 1.02E-01 | 18696 | 0.164         | -0.834  | 1.162   | 0.509  | 0.322  | 0.002  | 7.47E-01 | 18245 |
| 28               | OFCant_R            | -0.638   | -2.210   | 0.934   | 0.802  | -0.795 | -0.006 | 4.26E-01 | 18696 | 0.488         | -0.831  | 1.807   | 0.673  | 0.726  | 0.005  | 4.68E-01 | 18245 |
| 29               | OFCpost_L           | -1.538   | -3.027   | -0.050  | 0.760  | -2.025 | -0.015 | 4.28E-02 | 18696 | 0.063         | -1.188  | 1.313   | 0.638  | 0.098  | 0.001  | 9.22E-01 | 18245 |
| 30               | OFCpost_R           | -0.990   | -2.367   | 0.386   | 0.702  | -1.410 | -0.010 | 1.58E-01 | 18696 | 0.184         | -0.969  | 1.338   | 0.589  | 0.313  | 0.002  | 7.54E-01 | 18245 |
| 31               | OFClat_L            | -0.153   | -0.656   | 0.349   | 0.256  | -0.599 | -0.004 | 5.49E-01 | 18696 | 0.817         | 0.395   | 1.238   | 0.215  | 3.798  | 0.028  | 1.46E-04 | 18245 |
| 32               | OFClat_R            | -0.038   | -0.462   | 0.386   | 0.217  | -0.175 | -0.001 | 8.61E-01 | 18696 | 0.428         | 0.072   | 0.784   | 0.181  | 2.358  | 0.017  | 1.84E-02 | 18245 |
| 33               | Insula_L            | -9.303   | -13.906  | -4.700  | 2.348  | -3.961 | -0.029 | 7.48E-05 | 18696 | 3.061         | -0.799  | 6.921   | 1.969  | 1.554  | 0.012  | 1.20E-01 | 18245 |
| 34               | Insula_R            | -7.436   | -11.922  | -2.950  | 2.289  | -3.249 | -0.024 | 1.16E-03 | 18696 | 5.222         | 1.460   | 8.984   | 1.919  | 2.721  | 0.020  | 6.52E-03 | 18245 |
| 37               | Cingulate_Mid_L     | -1.905   | -5.800   | 1.989   | 1.987  | -0.959 | -0.007 | 3.38E-01 | 18696 | -0.652        | -3.916  | 2.612   | 1.665  | -0.391 | -0.003 | 6.95E-01 | 18245 |
| 38               | Cingulate_Mid_R     | -3.302   | -7.455   | 0.851   | 2.119  | -1.559 | -0.011 | 1.19E-01 | 18696 | -1.042        | -4.523  | 2.439   | 1.776  | -0.587 | -0.004 | 5.57E-01 | 18245 |
| 39               | Cingulate_Post_L    | -0.815   | -2.005   | 0.374   | 0.607  | -1.343 | -0.010 | 1.79E-01 | 18696 | -0.194        | -1.189  | 0.802   | 0.508  | -0.381 | -0.003 | 7.03E-01 | 18245 |

|    |                      |        |         |        |       |        |        |          |       |        |         |        |       |        |        |          |       |
|----|----------------------|--------|---------|--------|-------|--------|--------|----------|-------|--------|---------|--------|-------|--------|--------|----------|-------|
| 40 | Cingulate_Post_R     | -0.540 | -1.200  | 0.120  | 0.337 | -1.604 | -0.012 | 1.09E-01 | 18696 | -0.162 | -0.715  | 0.391  | 0.282 | -0.574 | -0.004 | 5.66E-01 | 18245 |
| 41 | Hippocampus_L        | -0.754 | -2.678  | 1.169  | 0.981 | -0.769 | -0.006 | 4.42E-01 | 18696 | 1.196  | -0.419  | 2.811  | 0.824 | 1.452  | 0.011  | 1.47E-01 | 18245 |
| 42 | Hippocampus_R        | 0.590  | -1.404  | 2.584  | 1.017 | 0.580  | 0.004  | 5.62E-01 | 18696 | 1.400  | -0.275  | 3.075  | 0.855 | 1.638  | 0.012  | 1.01E-01 | 18245 |
| 43 | ParaHippocampal_L    | -0.588 | -2.297  | 1.121  | 0.872 | -0.674 | -0.005 | 5.00E-01 | 18696 | 0.857  | -0.576  | 2.291  | 0.732 | 1.172  | 0.009  | 2.41E-01 | 18245 |
| 44 | ParaHippocampal_R    | -0.475 | -2.631  | 1.682  | 1.100 | -0.431 | -0.003 | 6.66E-01 | 18696 | 0.833  | -0.977  | 2.642  | 0.923 | 0.902  | 0.007  | 3.67E-01 | 18245 |
| 45 | Amygdala_L           | -0.700 | -1.365  | -0.036 | 0.339 | -2.066 | -0.015 | 3.88E-02 | 18696 | 0.445  | -0.112  | 1.001  | 0.284 | 1.566  | 0.012  | 1.17E-01 | 18245 |
| 46 | Amygdala_R           | -0.914 | -1.593  | -0.234 | 0.347 | -2.636 | -0.019 | 8.40E-03 | 18696 | 0.170  | -0.400  | 0.740  | 0.291 | 0.584  | 0.004  | 5.59E-01 | 18245 |
| 47 | Calcarine_L          | -3.105 | -9.444  | 3.234  | 3.234 | -0.960 | -0.007 | 3.37E-01 | 18696 | -7.137 | -12.446 | -1.827 | 2.709 | -2.635 | -0.020 | 8.43E-03 | 18245 |
| 48 | Calcarine_R          | -3.554 | -8.850  | 1.742  | 2.702 | -1.315 | -0.010 | 1.88E-01 | 18696 | -5.104 | -9.539  | -0.669 | 2.263 | -2.256 | -0.017 | 2.41E-02 | 18245 |
| 49 | Cuneus_L             | -1.166 | -5.143  | 2.812  | 2.029 | -0.574 | -0.004 | 5.66E-01 | 18696 | -4.551 | -7.883  | -1.218 | 1.700 | -2.677 | -0.020 | 7.44E-03 | 18245 |
| 50 | Cuneus_R             | -2.605 | -5.648  | 0.438  | 1.552 | -1.678 | -0.012 | 9.33E-02 | 18696 | -2.498 | -5.046  | 0.051  | 1.300 | -1.921 | -0.014 | 5.48E-02 | 18245 |
| 51 | Lingual_L            | -2.372 | -6.182  | 1.439  | 1.944 | -1.220 | -0.009 | 2.23E-01 | 18696 | -0.641 | -3.839  | 2.557  | 1.632 | -0.393 | -0.003 | 6.94E-01 | 18245 |
| 52 | Lingual_R            | -0.693 | -4.688  | 3.302  | 2.038 | -0.340 | -0.002 | 7.34E-01 | 18696 | -2.617 | -5.966  | 0.733  | 1.709 | -1.531 | -0.011 | 1.26E-01 | 18245 |
| 53 | Occipital_Sup_L      | -1.244 | -3.866  | 1.377  | 1.337 | -0.931 | -0.007 | 3.52E-01 | 18696 | -1.150 | -3.348  | 1.048  | 1.121 | -1.026 | -0.008 | 3.05E-01 | 18245 |
| 54 | Occipital_Sup_R      | -1.895 | -4.737  | 0.947  | 1.450 | -1.307 | -0.010 | 1.91E-01 | 18696 | 0.624  | -1.759  | 3.007  | 1.216 | 0.513  | 0.004  | 6.08E-01 | 18245 |
| 55 | Occipital_Mid_L      | -0.327 | -6.472  | 5.818  | 3.135 | -0.104 | -0.001 | 9.17E-01 | 18696 | -0.401 | -5.545  | 4.742  | 2.624 | -0.153 | -0.001 | 8.78E-01 | 18245 |
| 56 | Occipital_Mid_R      | -3.588 | -7.862  | 0.686  | 2.181 | -1.646 | -0.012 | 9.99E-02 | 18696 | 0.986  | -2.595  | 4.568  | 1.827 | 0.540  | 0.004  | 5.89E-01 | 18245 |
| 57 | Occipital_Inf_L      | -1.909 | -3.948  | 0.130  | 1.040 | -1.835 | -0.013 | 6.65E-02 | 18696 | -1.298 | -3.008  | 0.411  | 0.872 | -1.489 | -0.011 | 1.37E-01 | 18245 |
| 58 | Occipital_Inf_R      | -2.054 | -4.409  | 0.301  | 1.201 | -1.710 | -0.013 | 8.74E-02 | 18696 | -0.379 | -2.352  | 1.594  | 1.007 | -0.377 | -0.003 | 7.06E-01 | 18245 |
| 59 | Fusiform_L           | -2.679 | -7.142  | 1.784  | 2.277 | -1.177 | -0.009 | 2.39E-01 | 18696 | -0.041 | -3.776  | 3.695  | 1.906 | -0.021 | 0.000  | 9.83E-01 | 18245 |
| 60 | Fusiform_R           | -2.530 | -7.437  | 2.378  | 2.504 | -1.010 | -0.007 | 3.12E-01 | 18696 | 2.913  | -1.203  | 7.028  | 2.099 | 1.387  | 0.010  | 1.65E-01 | 18245 |
| 61 | Postcentral_L        | 0.578  | -6.137  | 7.293  | 3.426 | 0.169  | 0.001  | 8.66E-01 | 18696 | 8.290  | 2.676   | 13.903 | 2.864 | 2.894  | 0.021  | 3.80E-03 | 18245 |
| 62 | Postcentral_R        | -0.822 | -7.702  | 6.058  | 3.510 | -0.234 | -0.002 | 8.15E-01 | 18696 | 5.121  | -0.639  | 10.881 | 2.939 | 1.743  | 0.013  | 8.14E-02 | 18245 |
| 63 | Parietal_Sup_L       | -0.406 | -4.275  | 3.463  | 1.974 | -0.205 | -0.002 | 8.37E-01 | 18696 | -1.196 | -4.439  | 2.048  | 1.655 | -0.723 | -0.005 | 4.70E-01 | 18245 |
| 64 | Parietal_Sup_R       | 1.311  | -2.120  | 4.743  | 1.751 | 0.749  | 0.005  | 4.54E-01 | 18696 | 0.321  | -2.552  | 3.195  | 1.466 | 0.219  | 0.002  | 8.26E-01 | 18245 |
| 65 | Parietal_Inf_L       | -4.278 | -9.342  | 0.787  | 2.584 | -1.656 | -0.012 | 9.78E-02 | 18696 | 0.656  | -3.584  | 4.896  | 2.163 | 0.303  | 0.002  | 7.62E-01 | 18245 |
| 66 | Parietal_Inf_R       | -0.556 | -3.838  | 2.725  | 1.674 | -0.332 | -0.002 | 7.40E-01 | 18696 | 0.695  | -2.050  | 3.440  | 1.400 | 0.496  | 0.004  | 6.20E-01 | 18245 |
| 67 | SupraMarginal_L      | -2.743 | -5.711  | 0.224  | 1.514 | -1.812 | -0.013 | 7.00E-02 | 18696 | 2.551  | 0.063   | 5.039  | 1.269 | 2.010  | 0.015  | 4.45E-02 | 18245 |
| 68 | SupraMarginal_R      | -1.924 | -6.124  | 2.276  | 2.143 | -0.898 | -0.007 | 3.69E-01 | 18696 | 3.905  | 0.386   | 7.424  | 1.795 | 2.175  | 0.016  | 2.96E-02 | 18245 |
| 69 | Angular_L            | -1.422 | -4.336  | 1.492  | 1.487 | -0.956 | -0.007 | 3.39E-01 | 18696 | 0.908  | -1.534  | 3.350  | 1.246 | 0.729  | 0.005  | 4.66E-01 | 18245 |
| 70 | Angular_R            | -1.118 | -5.028  | 2.792  | 1.995 | -0.560 | -0.004 | 5.75E-01 | 18696 | 0.619  | -2.662  | 3.901  | 1.674 | 0.370  | 0.003  | 7.11E-01 | 18245 |
| 71 | Precuneus_L          | -3.261 | -10.366 | 3.845  | 3.625 | -0.899 | -0.007 | 3.68E-01 | 18696 | -3.208 | -9.159  | 2.743  | 3.036 | -1.057 | -0.008 | 2.91E-01 | 18245 |
| 72 | Precuneus_R          | -5.649 | -11.979 | 0.681  | 3.229 | -1.749 | -0.013 | 8.03E-02 | 18696 | -2.730 | -8.037  | 2.576  | 2.707 | -1.008 | -0.007 | 3.13E-01 | 18245 |
| 73 | Paracentral_Lobule_L | 0.284  | -2.970  | 3.537  | 1.660 | 0.171  | 0.001  | 8.64E-01 | 18696 | -0.974 | -3.697  | 1.748  | 1.389 | -0.701 | -0.005 | 4.83E-01 | 18245 |
| 74 | Paracentral_Lobule_R | 0.248  | -2.081  | 2.577  | 1.188 | 0.209  | 0.002  | 8.35E-01 | 18696 | -0.879 | -2.831  | 1.074  | 0.996 | -0.882 | -0.007 | 3.78E-01 | 18245 |
| 75 | Caudate_L            | 0.867  | -1.729  | 3.463  | 1.324 | 0.654  | 0.005  | 5.13E-01 | 18696 | -0.091 | -2.264  | 2.082  | 1.109 | -0.082 | -0.001 | 9.35E-01 | 18245 |
| 76 | Caudate_R            | 0.814  | -2.125  | 3.752  | 1.499 | 0.543  | 0.004  | 5.87E-01 | 18696 | 0.255  | -2.203  | 2.714  | 1.254 | 0.203  | 0.002  | 8.39E-01 | 18245 |
| 77 | Putamen_L            | -4.906 | -8.851  | -0.960 | 2.013 | -2.437 | -0.018 | 1.48E-02 | 18696 | 0.119  | -3.185  | 3.424  | 1.686 | 0.071  | 0.001  | 9.44E-01 | 18245 |
| 78 | Putamen_R            | -5.469 | -9.487  | -1.451 | 2.050 | -2.668 | -0.020 | 7.64E-03 | 18696 | 0.892  | -2.474  | 4.258  | 1.717 | 0.519  | 0.004  | 6.04E-01 | 18245 |
| 79 | Pallidum_L           | -0.106 | -0.457  | 0.244  | 0.179 | -0.595 | -0.004 | 5.52E-01 | 18696 | 0.028  | -0.265  | 0.322  | 0.150 | 0.189  | 0.001  | 8.50E-01 | 18245 |
| 80 | Pallidum_R           | -0.222 | -0.607  | 0.163  | 0.196 | -1.132 | -0.008 | 2.58E-01 | 18696 | 0.021  | -0.301  | 0.344  | 0.165 | 0.129  | 0.001  | 8.97E-01 | 18245 |
| 83 | Heschl_L             | -0.913 | -1.624  | -0.201 | 0.363 | -2.515 | -0.018 | 1.19E-02 | 18696 | 0.258  | -0.338  | 0.854  | 0.304 | 0.847  | 0.006  | 3.97E-01 | 18245 |
| 84 | Heschl_R             | -0.591 | -1.386  | 0.203  | 0.405 | -1.459 | -0.011 | 1.45E-01 | 18696 | 0.455  | -0.212  | 1.121  | 0.340 | 1.337  | 0.010  | 1.81E-01 | 18245 |
| 85 | Temporal_Sup_L       | -8.637 | -13.772 | -3.502 | 2.620 | -3.297 | -0.024 | 9.80E-04 | 18696 | 4.188  | -0.118  | 8.495  | 2.197 | 1.906  | 0.014  | 5.66E-02 | 18245 |
| 86 | Temporal_Sup_R       | -5.567 | -11.250 | 0.116  | 2.899 | -1.920 | -0.014 | 5.49E-02 | 18696 | 5.859  | 1.097   | 10.621 | 2.429 | 2.412  | 0.018  | 1.59E-02 | 18245 |
| 87 | Temporal_Pole_Sup_L  | -2.372 | -4.805  | 0.061  | 1.241 | -1.911 | -0.014 | 5.60E-02 | 18696 | 1.108  | -0.931  | 3.147  | 1.040 | 1.065  | 0.008  | 2.87E-01 | 18245 |
| 88 | Temporal_Pole_Sup_R  | -3.004 | -5.566  | -0.441 | 1.307 | -2.297 | -0.017 | 2.16E-02 | 18696 | 0.768  | -1.381  | 2.916  | 1.096 | 0.700  | 0.005  | 4.84E-01 | 18245 |
| 89 | Temporal_Mid_L       | -7.999 | -16.561 | 0.563  | 4.368 | -1.831 | -0.013 | 6.71E-02 | 18696 | 2.490  | -4.681  | 9.660  | 3.658 | 0.681  | 0.005  | 4.96E-01 | 18245 |
| 90 | Temporal_Mid_R       | -3.378 | -10.982 | 4.226  | 3.880 | -0.871 | -0.006 | 3.84E-01 | 18696 | 3.131  | -3.245  | 9.507  | 3.253 | 0.963  | 0.007  | 3.36E-01 | 18245 |

|     |                     |        |         |        |       |        |        |          |       |        |        |        |       |        |        |          |       |
|-----|---------------------|--------|---------|--------|-------|--------|--------|----------|-------|--------|--------|--------|-------|--------|--------|----------|-------|
| 91  | Temporal_Pole_Mid_L | -1.090 | -3.135  | 0.954  | 1.043 | -1.045 | -0.008 | 2.96E-01 | 18696 | 0.134  | -1.581 | 1.848  | 0.875 | 0.153  | 0.001  | 8.78E-01 | 18245 |
| 92  | Temporal_Pole_Mid_R | -1.210 | -3.696  | 1.276  | 1.268 | -0.954 | -0.007 | 3.40E-01 | 18696 | 1.881  | -0.201 | 3.963  | 1.062 | 1.771  | 0.013  | 7.65E-02 | 18245 |
| 93  | Temporal_Inf_L      | -3.366 | -9.251  | 2.518  | 3.002 | -1.121 | -0.008 | 2.62E-01 | 18696 | -1.244 | -6.175 | 3.687  | 2.516 | -0.494 | -0.004 | 6.21E-01 | 18245 |
| 94  | Temporal_Inf_R      | -3.482 | -9.902  | 2.938  | 3.275 | -1.063 | -0.008 | 2.88E-01 | 18696 | 1.457  | -3.912 | 6.826  | 2.739 | 0.532  | 0.004  | 5.95E-01 | 18245 |
| 95  | Cerebellum_Crus1_L  | -3.112 | -10.099 | 3.874  | 3.564 | -0.873 | -0.006 | 3.83E-01 | 18696 | -3.975 | -9.820 | 1.870  | 2.982 | -1.333 | -0.010 | 1.83E-01 | 18245 |
| 96  | Cerebellum_Crus1_R  | 0.011  | -7.114  | 7.136  | 3.635 | 0.003  | 0.000  | 9.98E-01 | 18696 | 2.292  | -3.672 | 8.256  | 3.042 | 0.753  | 0.006  | 4.51E-01 | 18245 |
| 97  | Cerebellum_Crus2_L  | -4.368 | -9.910  | 1.174  | 2.827 | -1.545 | -0.011 | 1.22E-01 | 18696 | -1.662 | -6.306 | 2.982  | 2.369 | -0.701 | -0.005 | 4.83E-01 | 18245 |
| 98  | Cerebellum_Crus2_R  | -1.526 | -6.652  | 3.600  | 2.615 | -0.583 | -0.004 | 5.60E-01 | 18696 | 0.604  | -3.689 | 4.897  | 2.190 | 0.276  | 0.002  | 7.83E-01 | 18245 |
| 99  | Cerebellum_3_L      | -0.450 | -0.822  | -0.078 | 0.190 | -2.371 | -0.017 | 1.78E-02 | 18696 | -0.336 | -0.647 | -0.024 | 0.159 | -2.114 | -0.016 | 3.45E-02 | 18245 |
| 100 | Cerebellum_3_R      | -0.281 | -0.783  | 0.221  | 0.256 | -1.097 | -0.008 | 2.73E-01 | 18696 | -0.265 | -0.684 | 0.155  | 0.214 | -1.235 | -0.009 | 2.17E-01 | 18245 |
| 101 | Cerebellum_4_5_L    | -1.860 | -4.868  | 1.149  | 1.535 | -1.212 | -0.009 | 2.26E-01 | 18696 | -0.434 | -2.952 | 2.085  | 1.285 | -0.338 | -0.002 | 7.36E-01 | 18245 |
| 102 | Cerebellum_4_5_R    | -0.875 | -3.327  | 1.577  | 1.251 | -0.699 | -0.005 | 4.84E-01 | 18696 | -0.510 | -2.563 | 1.543  | 1.047 | -0.487 | -0.004 | 6.26E-01 | 18245 |
| 103 | Cerebellum_6_L      | -2.795 | -7.995  | 2.406  | 2.653 | -1.053 | -0.008 | 2.92E-01 | 18696 | -1.937 | -6.290 | 2.416  | 2.221 | -0.872 | -0.006 | 3.83E-01 | 18245 |
| 104 | Cerebellum_6_R      | -1.610 | -7.090  | 3.869  | 2.796 | -0.576 | -0.004 | 5.65E-01 | 18696 | -1.553 | -6.143 | 3.036  | 2.342 | -0.663 | -0.005 | 5.07E-01 | 18245 |
| 105 | Cerebellum_7b_L     | -1.650 | -3.344  | 0.045  | 0.864 | -1.908 | -0.014 | 5.63E-02 | 18696 | -0.066 | -1.486 | 1.353  | 0.724 | -0.092 | -0.001 | 9.27E-01 | 18245 |
| 106 | Cerebellum_7b_R     | -1.904 | -3.583  | -0.225 | 0.857 | -2.223 | -0.016 | 2.62E-02 | 18696 | 0.843  | -0.564 | 2.250  | 0.718 | 1.174  | 0.009  | 2.40E-01 | 18245 |
| 107 | Cerebellum_8_L      | -4.540 | -9.918  | 0.839  | 2.744 | -1.654 | -0.012 | 9.81E-02 | 18696 | -1.960 | -6.465 | 2.545  | 2.298 | -0.853 | -0.006 | 3.94E-01 | 18245 |
| 108 | Cerebellum_8_R      | -6.791 | -13.790 | 0.208  | 3.571 | -1.902 | -0.014 | 5.72E-02 | 18696 | 2.543  | -3.320 | 8.407  | 2.992 | 0.850  | 0.006  | 3.95E-01 | 18245 |
| 109 | Cerebellum_9_L      | -3.331 | -6.372  | -0.289 | 1.552 | -2.146 | -0.016 | 3.19E-02 | 18696 | -1.163 | -3.712 | 1.385  | 1.300 | -0.895 | -0.007 | 3.71E-01 | 18245 |
| 110 | Cerebellum_9_R      | -3.434 | -6.423  | -0.445 | 1.525 | -2.252 | -0.016 | 2.43E-02 | 18696 | -1.215 | -3.719 | 1.289  | 1.278 | -0.951 | -0.007 | 3.41E-01 | 18245 |
| 111 | Cerebellum_10_L     | -0.074 | -0.290  | 0.142  | 0.110 | -0.671 | -0.005 | 5.02E-01 | 18696 | -0.115 | -0.296 | 0.066  | 0.092 | -1.242 | -0.009 | 2.14E-01 | 18245 |
| 112 | Cerebellum_10_R     | -0.017 | -0.242  | 0.207  | 0.115 | -0.150 | -0.001 | 8.81E-01 | 18696 | 0.014  | -0.174 | 0.202  | 0.096 | 0.149  | 0.001  | 8.82E-01 | 18245 |
| 113 | Vermis_1_2          | -0.064 | -0.205  | 0.076  | 0.072 | -0.901 | -0.007 | 3.68E-01 | 18696 | -0.192 | -0.309 | -0.074 | 0.060 | -3.201 | -0.024 | 1.37E-03 | 18245 |
| 114 | Vermis_3            | -0.462 | -1.019  | 0.096  | 0.284 | -1.624 | -0.012 | 1.04E-01 | 18696 | -0.349 | -0.816 | 0.117  | 0.238 | -1.467 | -0.011 | 1.42E-01 | 18245 |
| 115 | Vermis_4_5          | -0.633 | -2.272  | 1.006  | 0.836 | -0.757 | -0.006 | 4.49E-01 | 18696 | -0.216 | -1.589 | 1.157  | 0.700 | -0.308 | -0.002 | 7.58E-01 | 18245 |
| 116 | Vermis_6            | 0.064  | -0.849  | 0.976  | 0.466 | 0.137  | 0.001  | 8.91E-01 | 18696 | -1.138 | -1.902 | -0.374 | 0.390 | -2.919 | -0.022 | 3.52E-03 | 18245 |
| 117 | Vermis_7            | -0.169 | -0.685  | 0.347  | 0.263 | -0.641 | -0.005 | 5.21E-01 | 18696 | -0.387 | -0.818 | 0.045  | 0.220 | -1.756 | -0.013 | 7.91E-02 | 18245 |
| 118 | Vermis_8            | -0.315 | -1.163  | 0.532  | 0.433 | -0.729 | -0.005 | 4.66E-01 | 18696 | -1.044 | -1.754 | -0.334 | 0.362 | -2.882 | -0.021 | 3.95E-03 | 18245 |
| 119 | Vermis_9            | -0.542 | -1.229  | 0.145  | 0.351 | -1.547 | -0.011 | 1.22E-01 | 18696 | -0.391 | -0.967 | 0.184  | 0.293 | -1.334 | -0.010 | 1.82E-01 | 18245 |
| 120 | Vermis_10           | -0.034 | -0.226  | 0.158  | 0.098 | -0.347 | -0.003 | 7.28E-01 | 18696 | -0.113 | -0.274 | 0.047  | 0.082 | -1.384 | -0.010 | 1.66E-01 | 18245 |
| 121 | Tha_AV_L            | 0.038  | -0.039  | 0.114  | 0.039 | 0.960  | 0.007  | 3.37E-01 | 18696 | 0.082  | 0.018  | 0.146  | 0.033 | 2.498  | 0.018  | 1.25E-02 | 18245 |
| 122 | Tha_AV_R            | 0.045  | -0.065  | 0.155  | 0.056 | 0.806  | 0.006  | 4.20E-01 | 18696 | 0.084  | -0.008 | 0.175  | 0.047 | 1.799  | 0.013  | 7.21E-02 | 18245 |
| 123 | Tha_LP_L            | -0.009 | -0.094  | 0.076  | 0.043 | -0.201 | -0.001 | 8.41E-01 | 18696 | 0.078  | 0.007  | 0.149  | 0.036 | 2.142  | 0.016  | 3.22E-02 | 18245 |
| 124 | Tha_LP_R            | -0.018 | -0.129  | 0.093  | 0.057 | -0.315 | -0.002 | 7.53E-01 | 18696 | 0.065  | -0.027 | 0.158  | 0.047 | 1.386  | 0.010  | 1.66E-01 | 18245 |
| 125 | Tha_VA_L            | 0.106  | 0.015   | 0.197  | 0.046 | 2.290  | 0.017  | 2.21E-02 | 18696 | 0.070  | -0.006 | 0.146  | 0.039 | 1.808  | 0.013  | 7.06E-02 | 18245 |
| 126 | Tha_VA_R            | 0.096  | -0.015  | 0.208  | 0.057 | 1.694  | 0.012  | 9.03E-02 | 18696 | 0.093  | 0.000  | 0.186  | 0.048 | 1.958  | 0.014  | 5.03E-02 | 18245 |
| 127 | Tha_VL_L            | 0.086  | -0.172  | 0.345  | 0.132 | 0.656  | 0.005  | 5.12E-01 | 18696 | 0.285  | 0.070  | 0.501  | 0.110 | 2.594  | 0.019  | 9.50E-03 | 18245 |
| 128 | Tha_VL_R            | 0.095  | -0.248  | 0.438  | 0.175 | 0.543  | 0.004  | 5.87E-01 | 18696 | 0.387  | 0.101  | 0.674  | 0.146 | 2.647  | 0.020  | 8.12E-03 | 18245 |
| 129 | Tha_VPL_L           | -0.351 | -0.659  | -0.044 | 0.157 | -2.240 | -0.016 | 2.51E-02 | 18696 | 0.175  | -0.083 | 0.433  | 0.131 | 1.329  | 0.010  | 1.84E-01 | 18245 |
| 130 | Tha_VPL_R           | -0.351 | -0.674  | -0.027 | 0.165 | -2.127 | -0.016 | 3.35E-02 | 18696 | 0.276  | 0.005  | 0.547  | 0.138 | 1.996  | 0.015  | 4.59E-02 | 18245 |
| 131 | Tha_IL_L            | -0.149 | -0.282  | -0.016 | 0.068 | -2.194 | -0.016 | 2.82E-02 | 18696 | 0.060  | -0.051 | 0.172  | 0.057 | 1.060  | 0.008  | 2.89E-01 | 18245 |
| 132 | Tha_IL_R            | -0.116 | -0.266  | 0.035  | 0.077 | -1.501 | -0.011 | 1.33E-01 | 18696 | 0.062  | -0.064 | 0.189  | 0.064 | 0.970  | 0.007  | 3.32E-01 | 18245 |
| 133 | Tha_Re_L            | 0.000  | 0.000   | 0.001  | 0.000 | 1.603  | 0.012  | 1.09E-01 | 18696 | 0.001  | 0.000  | 0.001  | 0.000 | 2.133  | 0.016  | 3.29E-02 | 18245 |
| 134 | Tha_Re_R            | 0.001  | -0.004  | 0.005  | 0.002 | 0.422  | 0.003  | 6.73E-01 | 18696 | 0.004  | 0.000  | 0.008  | 0.002 | 2.004  | 0.015  | 4.51E-02 | 18245 |
| 135 | Tha_MDm_L           | -1.059 | -2.044  | -0.073 | 0.503 | -2.106 | -0.015 | 3.52E-02 | 18696 | 0.497  | -0.327 | 1.321  | 0.421 | 1.182  | 0.009  | 2.37E-01 | 18245 |
| 136 | Tha_MDm_R           | -0.971 | -2.116  | 0.175  | 0.584 | -1.661 | -0.012 | 9.67E-02 | 18696 | 0.512  | -0.445 | 1.469  | 0.488 | 1.048  | 0.008  | 2.95E-01 | 18245 |
| 137 | Tha_MDI_L           | -0.153 | -0.323  | 0.018  | 0.087 | -1.753 | -0.013 | 7.96E-02 | 18696 | 0.131  | -0.012 | 0.273  | 0.073 | 1.793  | 0.013  | 7.30E-02 | 18245 |
| 138 | Tha_MDI_R           | -0.140 | -0.334  | 0.054  | 0.099 | -1.416 | -0.010 | 1.57E-01 | 18696 | 0.097  | -0.066 | 0.259  | 0.083 | 1.168  | 0.009  | 2.43E-01 | 18245 |
| 139 | Tha_LGN_L           | -0.012 | -0.038  | 0.013  | 0.013 | -0.946 | -0.007 | 3.44E-01 | 18696 | 0.016  | -0.005 | 0.038  | 0.011 | 1.490  | 0.011  | 1.36E-01 | 18245 |

|     |            |        |        |        |       |        |        |          |       |        |        |       |       |        |        |          |       |
|-----|------------|--------|--------|--------|-------|--------|--------|----------|-------|--------|--------|-------|-------|--------|--------|----------|-------|
| 140 | Thal_LGN_R | -0.046 | -0.101 | 0.009  | 0.028 | -1.631 | -0.012 | 1.03E-01 | 18696 | 0.058  | 0.012  | 0.104 | 0.024 | 2.450  | 0.018  | 1.43E-02 | 18245 |
| 141 | Thal_MGN_L | -0.090 | -0.137 | -0.044 | 0.024 | -3.830 | -0.028 | 1.28E-04 | 18696 | 0.008  | -0.031 | 0.047 | 0.020 | 0.403  | 0.003  | 6.87E-01 | 18245 |
| 142 | Thal_MGN_R | -0.069 | -0.119 | -0.019 | 0.026 | -2.700 | -0.020 | 6.95E-03 | 18696 | 0.029  | -0.013 | 0.071 | 0.021 | 1.343  | 0.010  | 1.79E-01 | 18245 |
| 143 | Thal_PuA_L | -0.080 | -0.134 | -0.025 | 0.028 | -2.860 | -0.021 | 4.25E-03 | 18696 | 0.010  | -0.036 | 0.055 | 0.023 | 0.408  | 0.003  | 6.83E-01 | 18245 |
| 144 | Thal_PuA_R | -0.140 | -0.254 | -0.027 | 0.058 | -2.427 | -0.018 | 1.52E-02 | 18696 | 0.053  | -0.042 | 0.149 | 0.049 | 1.102  | 0.008  | 2.70E-01 | 18245 |
| 145 | Thal_PuM_L | -1.456 | -2.540 | -0.372 | 0.553 | -2.632 | -0.019 | 8.48E-03 | 18696 | 0.090  | -0.820 | 0.999 | 0.464 | 0.194  | 0.001  | 8.46E-01 | 18245 |
| 146 | Thal_PuM_R | -1.589 | -2.940 | -0.238 | 0.689 | -2.306 | -0.017 | 2.11E-02 | 18696 | 0.411  | -0.722 | 1.544 | 0.578 | 0.712  | 0.005  | 4.77E-01 | 18245 |
| 147 | Thal_PuL_L | -0.249 | -0.447 | -0.051 | 0.101 | -2.467 | -0.018 | 1.36E-02 | 18696 | 0.042  | -0.124 | 0.208 | 0.085 | 0.498  | 0.004  | 6.19E-01 | 18245 |
| 148 | Thal_PuL_R | -0.388 | -0.703 | -0.074 | 0.160 | -2.420 | -0.018 | 1.55E-02 | 18696 | 0.091  | -0.173 | 0.355 | 0.135 | 0.677  | 0.005  | 4.98E-01 | 18245 |
| 149 | Thal_PuL_L | -0.014 | -0.068 | 0.039  | 0.027 | -0.526 | -0.004 | 5.99E-01 | 18696 | 0.022  | -0.023 | 0.067 | 0.023 | 0.942  | 0.007  | 3.46E-01 | 18245 |
| 150 | Thal_PuL_R | -0.011 | -0.082 | 0.060  | 0.036 | -0.304 | -0.002 | 7.61E-01 | 18696 | 0.046  | -0.013 | 0.106 | 0.030 | 1.528  | 0.011  | 1.26E-01 | 18245 |
| 151 | ACC_sub_L  | -0.105 | -0.725 | 0.516  | 0.317 | -0.331 | -0.002 | 7.41E-01 | 18696 | 0.195  | -0.326 | 0.715 | 0.266 | 0.733  | 0.005  | 4.64E-01 | 18245 |
| 152 | ACC_sub_R  | 0.011  | -0.569 | 0.591  | 0.296 | 0.037  | 0.000  | 9.71E-01 | 18696 | 0.201  | -0.285 | 0.687 | 0.248 | 0.810  | 0.006  | 4.18E-01 | 18245 |
| 153 | ACC_pre_L  | -0.578 | -2.170 | 1.014  | 0.812 | -0.712 | -0.005 | 4.77E-01 | 18696 | 0.876  | -0.459 | 2.211 | 0.681 | 1.286  | 0.010  | 1.98E-01 | 18245 |
| 154 | ACC_pre_R  | -0.768 | -2.301 | 0.765  | 0.782 | -0.982 | -0.007 | 3.26E-01 | 18696 | 0.881  | -0.404 | 2.166 | 0.656 | 1.343  | 0.010  | 1.79E-01 | 18245 |
| 155 | ACC_sup_L  | -0.613 | -2.342 | 1.116  | 0.882 | -0.695 | -0.005 | 4.87E-01 | 18696 | 0.072  | -1.380 | 1.523 | 0.740 | 0.097  | 0.001  | 9.23E-01 | 18245 |
| 156 | ACC_sup_R  | -1.348 | -3.140 | 0.443  | 0.914 | -1.475 | -0.011 | 1.40E-01 | 18696 | 0.080  | -1.421 | 1.582 | 0.766 | 0.105  | 0.001  | 9.17E-01 | 18245 |
| 157 | N_Acc_L    | 0.077  | -0.443 | 0.598  | 0.266 | 0.290  | 0.002  | 7.72E-01 | 18696 | 0.499  | 0.063  | 0.936 | 0.223 | 2.241  | 0.017  | 2.50E-02 | 18245 |
| 158 | N_Acc_R    | -0.098 | -0.548 | 0.352  | 0.230 | -0.429 | -0.003 | 6.68E-01 | 18696 | 0.572  | 0.195  | 0.950 | 0.193 | 2.970  | 0.022  | 2.98E-03 | 18245 |
| 159 | VTA_L      | -0.005 | -0.023 | 0.014  | 0.009 | -0.503 | -0.004 | 6.15E-01 | 18696 | 0.006  | -0.009 | 0.021 | 0.008 | 0.788  | 0.006  | 4.31E-01 | 18245 |
| 160 | VTA_R      | -0.002 | -0.019 | 0.014  | 0.008 | -0.254 | -0.002 | 8.00E-01 | 18696 | 0.000  | -0.014 | 0.014 | 0.007 | 0.018  | 0.000  | 9.86E-01 | 18245 |
| 161 | SN_pc_L    | -0.036 | -0.066 | -0.007 | 0.015 | -2.424 | -0.018 | 1.54E-02 | 18696 | -0.006 | -0.031 | 0.019 | 0.013 | -0.482 | -0.004 | 6.30E-01 | 18245 |
| 162 | SN_pc_R    | -0.032 | -0.071 | 0.006  | 0.020 | -1.649 | -0.012 | 9.92E-02 | 18696 | -0.007 | -0.039 | 0.025 | 0.017 | -0.425 | -0.003 | 6.71E-01 | 18245 |
| 163 | SN_pr_L    | -0.040 | -0.080 | 0.000  | 0.020 | -1.984 | -0.015 | 4.73E-02 | 18696 | 0.011  | -0.023 | 0.044 | 0.017 | 0.623  | 0.005  | 5.33E-01 | 18245 |
| 164 | SN_pr_R    | -0.034 | -0.079 | 0.011  | 0.023 | -1.497 | -0.011 | 1.34E-01 | 18696 | 0.024  | -0.014 | 0.062 | 0.019 | 1.248  | 0.009  | 2.12E-01 | 18245 |
| 165 | Red_N_L    | -0.042 | -0.091 | 0.008  | 0.025 | -1.659 | -0.012 | 9.70E-02 | 18696 | 0.021  | -0.021 | 0.062 | 0.021 | 0.986  | 0.007  | 3.24E-01 | 18245 |
| 166 | Red_N_R    | -0.024 | -0.078 | 0.029  | 0.027 | -0.891 | -0.007 | 3.73E-01 | 18696 | 0.005  | -0.040 | 0.050 | 0.023 | 0.225  | 0.002  | 8.22E-01 | 18245 |
| 167 | LC_L       | 0.003  | -0.015 | 0.021  | 0.009 | 0.321  | 0.002  | 7.49E-01 | 18696 | -0.015 | -0.030 | 0.001 | 0.008 | -1.860 | -0.014 | 6.29E-02 | 18245 |
| 168 | LC_R       | 0.011  | -0.009 | 0.032  | 0.010 | 1.120  | 0.008  | 2.63E-01 | 18696 | -0.014 | -0.031 | 0.003 | 0.009 | -1.643 | -0.012 | 1.00E-01 | 18245 |
| 169 | Raphe_D    | -0.056 | -0.127 | 0.015  | 0.036 | -1.535 | -0.011 | 1.25E-01 | 18696 | 0.021  | -0.039 | 0.080 | 0.031 | 0.678  | 0.005  | 4.98E-01 | 18245 |
| 170 | Raphe_M    | 0.000  | -0.022 | 0.022  | 0.011 | -0.002 | 0.000  | 9.98E-01 | 18696 | -0.016 | -0.034 | 0.002 | 0.009 | -1.710 | -0.013 | 8.73E-02 | 18245 |

Non-oily fish intake

| Number | AAL 3 region        | beta     | 95%CI l  | 95%CI h | se      | t      | r      | p        | df.e  |
|--------|---------------------|----------|----------|---------|---------|--------|--------|----------|-------|
| 0      | Total brain         | -159.545 | -356.492 | 37.402  | 100.478 | -1.588 | -0.012 | 1.12E-01 | 18667 |
| 1      | Precentral_L        | -5.435   | -12.369  | 1.499   | 3.538   | -1.536 | -0.011 | 1.24E-01 | 18667 |
| 2      | Precentral_R        | 1.551    | -4.803   | 7.906   | 3.242   | 0.478  | 0.004  | 6.32E-01 | 18667 |
| 3      | Frontal_Sup_2_L     | -3.548   | -10.869  | 3.773   | 3.735   | -0.950 | -0.007 | 3.42E-01 | 18667 |
| 4      | Frontal_Sup_2_R     | -9.608   | -17.675  | -1.540  | 4.116   | -2.334 | -0.017 | 1.96E-02 | 18667 |
| 5      | Frontal_Mid_2_L     | -6.405   | -14.097  | 1.287   | 3.924   | -1.632 | -0.012 | 1.03E-01 | 18667 |
| 6      | Frontal_Mid_2_R     | -10.148  | -18.849  | -1.447  | 4.439   | -2.286 | -0.017 | 2.23E-02 | 18667 |
| 7      | Frontal_Inf_Oper_L  | -1.219   | -3.489   | 1.052   | 1.158   | -1.052 | -0.008 | 2.93E-01 | 18667 |
| 8      | Frontal_Inf_Oper_R  | -1.622   | -4.469   | 1.226   | 1.453   | -1.116 | -0.008 | 2.64E-01 | 18667 |
| 9      | Frontal_Inf_Tri_L   | -2.550   | -7.375   | 2.276   | 2.462   | -1.036 | -0.008 | 3.00E-01 | 18667 |
| 10     | Frontal_Inf_Tri_R   | -3.531   | -7.320   | 0.257   | 1.933   | -1.827 | -0.013 | 6.77E-02 | 18667 |
| 11     | Frontal_Inf_Orb_2_L | -1.121   | -2.563   | 0.321   | 0.736   | -1.523 | -0.011 | 1.28E-01 | 18667 |
| 12     | Frontal_Inf_Orb_2_R | -1.208   | -2.716   | 0.301   | 0.770   | -1.569 | -0.011 | 1.17E-01 | 18667 |
| 13     | Rolandic_Oper_L     | -0.218   | -2.400   | 1.963   | 1.113   | -0.196 | -0.001 | 8.44E-01 | 18667 |
| 14     | Rolandic_Oper_R     | -0.897   | -4.019   | 2.224   | 1.592   | -0.564 | -0.004 | 5.73E-01 | 18667 |
| 15     | Supp_Motor_Area_L   | -1.761   | -6.945   | 3.423   | 2.645   | -0.666 | -0.005 | 5.06E-01 | 18667 |

|    |                      |        |        |        |       |        |        |          |       |
|----|----------------------|--------|--------|--------|-------|--------|--------|----------|-------|
| 16 | Supp_Motor_Area_R    | -1.986 | -7.717 | 3.745  | 2.924 | -0.679 | -0.005 | 4.97E-01 | 18667 |
| 17 | Olfactory_L          | -0.289 | -1.060 | 0.482  | 0.393 | -0.734 | -0.005 | 4.63E-01 | 18667 |
| 18 | Olfactory_R          | -0.009 | -0.782 | 0.764  | 0.394 | -0.023 | 0.000  | 9.82E-01 | 18667 |
| 19 | Frontal_Sup_MediaL_L | -3.503 | -8.364 | 1.358  | 2.480 | -1.412 | -0.010 | 1.58E-01 | 18667 |
| 20 | Frontal_Sup_MediaL_R | -3.454 | -6.992 | 0.084  | 1.805 | -1.913 | -0.014 | 5.57E-02 | 18667 |
| 21 | Frontal_Med_Orb_L    | -0.530 | -2.346 | 1.285  | 0.926 | -0.572 | -0.004 | 5.67E-01 | 18667 |
| 22 | Frontal_Med_Orb_R    | -0.832 | -3.063 | 1.399  | 1.138 | -0.731 | -0.005 | 4.65E-01 | 18667 |
| 23 | Rectus_L             | -1.311 | -3.190 | 0.568  | 0.959 | -1.368 | -0.010 | 1.71E-01 | 18667 |
| 24 | Rectus_R             | -0.802 | -2.540 | 0.936  | 0.887 | -0.904 | -0.007 | 3.66E-01 | 18667 |
| 25 | OFCmed_L             | -1.438 | -2.527 | -0.348 | 0.556 | -2.587 | -0.019 | 9.69E-03 | 18667 |
| 26 | OFCmed_R             | -0.562 | -1.831 | 0.708  | 0.648 | -0.867 | -0.006 | 3.86E-01 | 18667 |
| 27 | OFCant_L             | -0.493 | -1.753 | 0.766  | 0.643 | -0.768 | -0.006 | 4.43E-01 | 18667 |
| 28 | OFCant_R             | -0.678 | -2.342 | 0.986  | 0.849 | -0.799 | -0.006 | 4.25E-01 | 18667 |
| 29 | OFCpost_L            | -0.587 | -2.165 | 0.990  | 0.805 | -0.730 | -0.005 | 4.66E-01 | 18667 |
| 30 | OFCpost_R            | -0.264 | -1.721 | 1.194  | 0.744 | -0.354 | -0.003 | 7.23E-01 | 18667 |
| 31 | OFClat_L             | -0.354 | -0.886 | 0.178  | 0.271 | -1.303 | -0.010 | 1.93E-01 | 18667 |
| 32 | OFClat_R             | -0.536 | -0.985 | -0.086 | 0.229 | -2.336 | -0.017 | 1.95E-02 | 18667 |
| 33 | Insula_L             | -2.595 | -7.473 | 2.284  | 2.489 | -1.042 | -0.008 | 2.97E-01 | 18667 |
| 34 | Insula_R             | -3.375 | -8.127 | 1.377  | 2.424 | -1.392 | -0.010 | 1.64E-01 | 18667 |
| 37 | Cingulate_Mid_L      | -3.748 | -7.870 | 0.375  | 2.103 | -1.782 | -0.013 | 7.48E-02 | 18667 |
| 38 | Cingulate_Mid_R      | -1.774 | -6.170 | 2.623  | 2.243 | -0.791 | -0.006 | 4.29E-01 | 18667 |
| 39 | Cingulate_Post_L     | 0.194  | -1.065 | 1.453  | 0.642 | 0.302  | 0.002  | 7.63E-01 | 18667 |
| 40 | Cingulate_Post_R     | -0.007 | -0.705 | 0.692  | 0.357 | -0.019 | 0.000  | 9.85E-01 | 18667 |
| 41 | Hippocampus_L        | 0.609  | -1.428 | 2.646  | 1.039 | 0.586  | 0.004  | 5.58E-01 | 18667 |
| 42 | Hippocampus_R        | 1.316  | -0.796 | 3.428  | 1.078 | 1.222  | 0.009  | 2.22E-01 | 18667 |
| 43 | ParaHippocampal_L    | 0.161  | -1.648 | 1.971  | 0.923 | 0.175  | 0.001  | 8.61E-01 | 18667 |
| 44 | ParaHippocampal_R    | 0.013  | -2.269 | 2.295  | 1.164 | 0.011  | 0.000  | 9.91E-01 | 18667 |
| 45 | Amygdala_L           | -0.096 | -0.800 | 0.608  | 0.359 | -0.267 | -0.002 | 7.90E-01 | 18667 |
| 46 | Amygdala_R           | -0.233 | -0.952 | 0.487  | 0.367 | -0.634 | -0.005 | 5.26E-01 | 18667 |
| 47 | Calcarine_L          | 0.554  | -6.160 | 7.268  | 3.425 | 0.162  | 0.001  | 8.71E-01 | 18667 |
| 48 | Calcarine_R          | 0.792  | -4.817 | 6.402  | 2.862 | 0.277  | 0.002  | 7.82E-01 | 18667 |
| 49 | Cuneus_L             | -1.820 | -6.030 | 2.389  | 2.148 | -0.848 | -0.006 | 3.97E-01 | 18667 |
| 50 | Cuneus_R             | -1.319 | -4.540 | 1.901  | 1.643 | -0.803 | -0.006 | 4.22E-01 | 18667 |
| 51 | Lingual_L            | -1.710 | -5.744 | 2.325  | 2.058 | -0.831 | -0.006 | 4.06E-01 | 18667 |
| 52 | Lingual_R            | -1.288 | -5.516 | 2.941  | 2.157 | -0.597 | -0.004 | 5.51E-01 | 18667 |
| 53 | Occipital_Sup_L      | -3.139 | -5.914 | -0.364 | 1.416 | -2.217 | -0.016 | 2.66E-02 | 18667 |
| 54 | Occipital_Sup_R      | -0.195 | -3.204 | 2.814  | 1.535 | -0.127 | -0.001 | 8.99E-01 | 18667 |
| 55 | Occipital_Mid_L      | 0.092  | -6.408 | 6.591  | 3.316 | 0.028  | 0.000  | 9.78E-01 | 18667 |
| 56 | Occipital_Mid_R      | -2.396 | -6.923 | 2.132  | 2.310 | -1.037 | -0.008 | 3.00E-01 | 18667 |
| 57 | Occipital_Inf_L      | 0.771  | -1.387 | 2.930  | 1.101 | 0.700  | 0.005  | 4.84E-01 | 18667 |
| 58 | Occipital_Inf_R      | -1.983 | -4.476 | 0.510  | 1.272 | -1.559 | -0.011 | 1.19E-01 | 18667 |
| 59 | Fusiform_L           | 0.572  | -4.154 | 5.297  | 2.411 | 0.237  | 0.002  | 8.13E-01 | 18667 |
| 60 | Fusiform_R           | -1.912 | -7.103 | 3.279  | 2.648 | -0.722 | -0.005 | 4.70E-01 | 18667 |
| 61 | Postcentral_L        | 3.686  | -3.421 | 10.794 | 3.626 | 1.017  | 0.007  | 3.09E-01 | 18667 |
| 62 | Postcentral_R        | 5.411  | -1.873 | 12.695 | 3.716 | 1.456  | 0.011  | 1.45E-01 | 18667 |
| 63 | Parietal_Sup_L       | -1.381 | -5.477 | 2.715  | 2.090 | -0.661 | -0.005 | 5.09E-01 | 18667 |
| 64 | Parietal_Sup_R       | -1.626 | -5.261 | 2.008  | 1.854 | -0.877 | -0.006 | 3.80E-01 | 18667 |
| 65 | Parietal_Inf_L       | 1.257  | -4.105 | 6.620  | 2.736 | 0.460  | 0.003  | 6.46E-01 | 18667 |
| 66 | Parietal_Inf_R       | -0.384 | -3.856 | 3.088  | 1.771 | -0.217 | -0.002 | 8.28E-01 | 18667 |

|     |                      |        |         |        |       |        |        |          |       |
|-----|----------------------|--------|---------|--------|-------|--------|--------|----------|-------|
| 67  | SupraMarginal_L      | -0.474 | -3.617  | 2.670  | 1.604 | -0.295 | -0.002 | 7.68E-01 | 18667 |
| 68  | SupraMarginal_R      | -2.144 | -6.590  | 2.302  | 2.268 | -0.945 | -0.007 | 3.45E-01 | 18667 |
| 69  | Angular_L            | 0.990  | -2.096  | 4.076  | 1.575 | 0.629  | 0.005  | 5.30E-01 | 18667 |
| 70  | Angular_R            | 0.838  | -3.299  | 4.976  | 2.111 | 0.397  | 0.003  | 6.91E-01 | 18667 |
| 71  | Precuneus_L          | 2.319  | -5.201  | 9.839  | 3.837 | 0.604  | 0.004  | 5.46E-01 | 18667 |
| 72  | Precuneus_R          | -0.450 | -7.149  | 6.249  | 3.418 | -0.132 | -0.001 | 8.95E-01 | 18667 |
| 73  | Paracentral_Lobule_L | -0.849 | -4.292  | 2.594  | 1.757 | -0.483 | -0.004 | 6.29E-01 | 18667 |
| 74  | Paracentral_Lobule_R | 1.678  | -0.789  | 4.144  | 1.258 | 1.333  | 0.010  | 1.83E-01 | 18667 |
| 75  | Caudate_L            | -1.090 | -3.842  | 1.662  | 1.404 | -0.776 | -0.006 | 4.38E-01 | 18667 |
| 76  | Caudate_R            | -2.415 | -5.531  | 0.701  | 1.590 | -1.519 | -0.011 | 1.29E-01 | 18667 |
| 77  | Putamen_L            | -2.824 | -7.003  | 1.355  | 2.132 | -1.324 | -0.010 | 1.85E-01 | 18667 |
| 78  | Putamen_R            | -3.469 | -7.725  | 0.787  | 2.171 | -1.598 | -0.012 | 1.10E-01 | 18667 |
| 79  | Pallidum_L           | -0.041 | -0.412  | 0.331  | 0.189 | -0.214 | -0.002 | 8.30E-01 | 18667 |
| 80  | Pallidum_R           | -0.045 | -0.453  | 0.363  | 0.208 | -0.216 | -0.002 | 8.29E-01 | 18667 |
| 83  | Heschl_L             | -0.138 | -0.891  | 0.615  | 0.384 | -0.359 | -0.003 | 7.19E-01 | 18667 |
| 84  | Heschl_R             | -0.486 | -1.327  | 0.355  | 0.429 | -1.132 | -0.008 | 2.58E-01 | 18667 |
| 85  | Temporal_Sup_L       | -2.691 | -8.130  | 2.748  | 2.775 | -0.970 | -0.007 | 3.32E-01 | 18667 |
| 86  | Temporal_Sup_R       | -2.232 | -8.249  | 3.785  | 3.070 | -0.727 | -0.005 | 4.67E-01 | 18667 |
| 87  | Temporal_Pole_Sup_L  | -0.208 | -2.784  | 2.369  | 1.314 | -0.158 | -0.001 | 8.74E-01 | 18667 |
| 88  | Temporal_Pole_Sup_R  | -0.974 | -3.686  | 1.738  | 1.384 | -0.704 | -0.005 | 4.81E-01 | 18667 |
| 89  | Temporal_Mid_L       | -1.480 | -10.543 | 7.583  | 4.624 | -0.320 | -0.002 | 7.49E-01 | 18667 |
| 90  | Temporal_Mid_R       | 5.093  | -2.948  | 13.135 | 4.103 | 1.241  | 0.009  | 2.14E-01 | 18667 |
| 91  | Temporal_Pole_Mid_L  | 1.159  | -1.005  | 3.323  | 1.104 | 1.050  | 0.008  | 2.94E-01 | 18667 |
| 92  | Temporal_Pole_Mid_R  | 0.730  | -1.900  | 3.361  | 1.342 | 0.544  | 0.004  | 5.86E-01 | 18667 |
| 93  | Temporal_Inf_L       | -1.126 | -7.354  | 5.101  | 3.177 | -0.355 | -0.003 | 7.23E-01 | 18667 |
| 94  | Temporal_Inf_R       | -0.672 | -7.461  | 6.117  | 3.463 | -0.194 | -0.001 | 8.46E-01 | 18667 |
| 95  | Cerebellum_Crus1_L   | -4.147 | -11.538 | 3.243  | 3.771 | -1.100 | -0.008 | 2.71E-01 | 18667 |
| 96  | Cerebellum_Crus1_R   | -5.836 | -13.373 | 1.701  | 3.845 | -1.518 | -0.011 | 1.29E-01 | 18667 |
| 97  | Cerebellum_Crus2_L   | -5.062 | -10.927 | 0.802  | 2.992 | -1.692 | -0.012 | 9.07E-02 | 18667 |
| 98  | Cerebellum_Crus2_R   | -4.654 | -10.078 | 0.770  | 2.767 | -1.682 | -0.012 | 9.26E-02 | 18667 |
| 99  | Cerebellum_3_L       | -0.202 | -0.595  | 0.192  | 0.201 | -1.003 | -0.007 | 3.16E-01 | 18667 |
| 100 | Cerebellum_3_R       | -0.341 | -0.872  | 0.190  | 0.271 | -1.258 | -0.009 | 2.08E-01 | 18667 |
| 101 | Cerebellum_4_5_L     | -3.050 | -6.235  | 0.134  | 1.625 | -1.878 | -0.014 | 6.05E-02 | 18667 |
| 102 | Cerebellum_4_5_R     | -2.441 | -5.036  | 0.154  | 1.324 | -1.844 | -0.013 | 6.52E-02 | 18667 |
| 103 | Cerebellum_6_L       | -2.938 | -8.441  | 2.565  | 2.807 | -1.047 | -0.008 | 2.95E-01 | 18667 |
| 104 | Cerebellum_6_R       | -3.061 | -8.858  | 2.737  | 2.958 | -1.035 | -0.008 | 3.01E-01 | 18667 |
| 105 | Cerebellum_7b_L      | -1.197 | -2.990  | 0.595  | 0.915 | -1.309 | -0.010 | 1.91E-01 | 18667 |
| 106 | Cerebellum_7b_R      | -2.150 | -3.927  | -0.373 | 0.907 | -2.372 | -0.017 | 1.77E-02 | 18667 |
| 107 | Cerebellum_8_L       | -5.488 | -11.177 | 0.201  | 2.903 | -1.891 | -0.014 | 5.87E-02 | 18667 |
| 108 | Cerebellum_8_R       | -9.115 | -16.519 | -1.712 | 3.777 | -2.413 | -0.018 | 1.58E-02 | 18667 |
| 109 | Cerebellum_9_L       | -1.242 | -4.461  | 1.977  | 1.642 | -0.756 | -0.006 | 4.50E-01 | 18667 |
| 110 | Cerebellum_9_R       | -0.898 | -4.063  | 2.266  | 1.614 | -0.556 | -0.004 | 5.78E-01 | 18667 |
| 111 | Cerebellum_10_L      | -0.029 | -0.257  | 0.200  | 0.117 | -0.247 | -0.002 | 8.05E-01 | 18667 |
| 112 | Cerebellum_10_R      | -0.133 | -0.371  | 0.104  | 0.121 | -1.099 | -0.008 | 2.72E-01 | 18667 |
| 113 | Vermis_1_2           | 0.016  | -0.133  | 0.164  | 0.076 | 0.205  | 0.002  | 8.37E-01 | 18667 |
| 114 | Vermis_3             | -0.155 | -0.746  | 0.435  | 0.301 | -0.516 | -0.004 | 6.06E-01 | 18667 |
| 115 | Vermis_4_5           | -0.543 | -2.278  | 1.192  | 0.885 | -0.613 | -0.004 | 5.40E-01 | 18667 |
| 116 | Vermis_6             | -0.021 | -0.988  | 0.945  | 0.493 | -0.043 | 0.000  | 9.65E-01 | 18667 |
| 117 | Vermis_7             | -0.115 | -0.661  | 0.431  | 0.279 | -0.414 | -0.003 | 6.79E-01 | 18667 |



|     |           |        |        |        |       |        |        |          |       |
|-----|-----------|--------|--------|--------|-------|--------|--------|----------|-------|
| 118 | Vermis_8  | -0.149 | -1.045 | 0.748  | 0.457 | -0.325 | -0.002 | 7.45E-01 | 18667 |
| 119 | Vermis_9  | -0.320 | -1.047 | 0.407  | 0.371 | -0.863 | -0.006 | 3.88E-01 | 18667 |
| 120 | Vermis_10 | -0.017 | -0.220 | 0.186  | 0.103 | -0.166 | -0.001 | 8.68E-01 | 18667 |
| 121 | Tha_AV_L  | 0.018  | -0.063 | 0.100  | 0.042 | 0.438  | 0.003  | 6.61E-01 | 18667 |
| 122 | Tha_AV_R  | 0.072  | -0.044 | 0.188  | 0.059 | 1.217  | 0.009  | 2.24E-01 | 18667 |
| 123 | Tha_LP_L  | -0.007 | -0.098 | 0.083  | 0.046 | -0.161 | -0.001 | 8.72E-01 | 18667 |
| 124 | Tha_LP_R  | -0.016 | -0.133 | 0.101  | 0.060 | -0.267 | -0.002 | 7.90E-01 | 18667 |
| 125 | Tha_VA_L  | 0.018  | -0.078 | 0.114  | 0.049 | 0.365  | 0.003  | 7.15E-01 | 18667 |
| 126 | Tha_VA_R  | 0.057  | -0.061 | 0.176  | 0.060 | 0.953  | 0.007  | 3.40E-01 | 18667 |
| 127 | Tha_VL_L  | -0.062 | -0.336 | 0.211  | 0.140 | -0.445 | -0.003 | 6.56E-01 | 18667 |
| 128 | Tha_VL_R  | -0.204 | -0.567 | 0.160  | 0.185 | -1.099 | -0.008 | 2.72E-01 | 18667 |
| 129 | Tha_VPL_L | -0.051 | -0.376 | 0.275  | 0.166 | -0.306 | -0.002 | 7.60E-01 | 18667 |
| 130 | Tha_VPL_R | -0.174 | -0.516 | 0.169  | 0.175 | -0.994 | -0.007 | 3.20E-01 | 18667 |
| 131 | Tha_IL_L  | -0.114 | -0.255 | 0.027  | 0.072 | -1.589 | -0.012 | 1.12E-01 | 18667 |
| 132 | Tha_IL_R  | -0.056 | -0.216 | 0.104  | 0.082 | -0.688 | -0.005 | 4.91E-01 | 18667 |
| 133 | Tha_Re_L  | -0.001 | -0.002 | 0.000  | 0.000 | -2.853 | -0.021 | 4.33E-03 | 18667 |
| 134 | Tha_Re_R  | 0.000  | -0.004 | 0.005  | 0.002 | 0.140  | 0.001  | 8.89E-01 | 18667 |
| 135 | Tha_MDm_L | -0.453 | -1.497 | 0.591  | 0.533 | -0.851 | -0.006 | 3.95E-01 | 18667 |
| 136 | Tha_MDm_R | -0.014 | -1.228 | 1.199  | 0.619 | -0.023 | 0.000  | 9.81E-01 | 18667 |
| 137 | Tha_MDI_L | -0.157 | -0.338 | 0.024  | 0.092 | -1.702 | -0.012 | 8.88E-02 | 18667 |
| 138 | Tha_MDI_R | -0.039 | -0.245 | 0.166  | 0.105 | -0.377 | -0.003 | 7.06E-01 | 18667 |
| 139 | Tha_LGN_L | -0.001 | -0.028 | 0.027  | 0.014 | -0.046 | 0.000  | 9.63E-01 | 18667 |
| 140 | Tha_LGN_R | -0.036 | -0.095 | 0.022  | 0.030 | -1.217 | -0.009 | 2.24E-01 | 18667 |
| 141 | Tha_MGN_L | -0.054 | -0.102 | -0.005 | 0.025 | -2.146 | -0.016 | 3.19E-02 | 18667 |
| 142 | Tha_MGN_R | -0.064 | -0.118 | -0.011 | 0.027 | -2.376 | -0.017 | 1.75E-02 | 18667 |
| 143 | Tha_PuA_L | -0.067 | -0.125 | -0.009 | 0.029 | -2.268 | -0.017 | 2.34E-02 | 18667 |
| 144 | Tha_PuA_R | -0.127 | -0.247 | -0.006 | 0.061 | -2.065 | -0.015 | 3.89E-02 | 18667 |
| 145 | Tha_PuM_L | -1.033 | -2.181 | 0.115  | 0.586 | -1.763 | -0.013 | 7.79E-02 | 18667 |
| 146 | Tha_PuM_R | -0.757 | -2.188 | 0.674  | 0.730 | -1.037 | -0.008 | 3.00E-01 | 18667 |
| 147 | Tha_PuL_L | -0.161 | -0.370 | 0.049  | 0.107 | -1.502 | -0.011 | 1.33E-01 | 18667 |
| 148 | Tha_PuL_R | -0.168 | -0.502 | 0.165  | 0.170 | -0.990 | -0.007 | 3.22E-01 | 18667 |
| 149 | Tha_PuL_L | -0.010 | -0.067 | 0.047  | 0.029 | -0.359 | -0.003 | 7.20E-01 | 18667 |
| 150 | Tha_PuL_R | 0.000  | -0.076 | 0.075  | 0.038 | -0.008 | 0.000  | 9.94E-01 | 18667 |
| 151 | ACC_sub_L | -0.660 | -1.318 | -0.003 | 0.335 | -1.969 | -0.014 | 4.90E-02 | 18667 |
| 152 | ACC_sub_R | -0.474 | -1.088 | 0.141  | 0.313 | -1.511 | -0.011 | 1.31E-01 | 18667 |
| 153 | ACC_pre_L | -1.766 | -3.450 | -0.081 | 0.860 | -2.054 | -0.015 | 4.00E-02 | 18667 |
| 154 | ACC_pre_R | -1.559 | -3.182 | 0.064  | 0.828 | -1.882 | -0.014 | 5.98E-02 | 18667 |
| 155 | ACC_sup_L | -2.970 | -4.800 | -1.139 | 0.934 | -3.180 | -0.023 | 1.48E-03 | 18667 |
| 156 | ACC_sup_R | -3.108 | -5.004 | -1.211 | 0.967 | -3.212 | -0.024 | 1.32E-03 | 18667 |
| 157 | N_Acc_L   | 0.006  | -0.545 | 0.557  | 0.281 | 0.021  | 0.000  | 9.83E-01 | 18667 |
| 158 | N_Acc_R   | 0.017  | -0.460 | 0.493  | 0.243 | 0.069  | 0.001  | 9.45E-01 | 18667 |
| 159 | VTA_L     | -0.006 | -0.025 | 0.013  | 0.010 | -0.604 | -0.004 | 5.46E-01 | 18667 |
| 160 | VTA_R     | 0.000  | -0.017 | 0.018  | 0.009 | 0.048  | 0.000  | 9.62E-01 | 18667 |
| 161 | SN_pc_L   | -0.029 | -0.060 | 0.002  | 0.016 | -1.856 | -0.014 | 6.35E-02 | 18667 |
| 162 | SN_pc_R   | -0.022 | -0.063 | 0.019  | 0.021 | -1.060 | -0.008 | 2.89E-01 | 18667 |
| 163 | SN_pr_L   | -0.024 | -0.066 | 0.018  | 0.022 | -1.104 | -0.008 | 2.69E-01 | 18667 |
| 164 | SN_pr_R   | 0.001  | -0.046 | 0.049  | 0.024 | 0.054  | 0.000  | 9.57E-01 | 18667 |
| 165 | Red_N_L   | -0.056 | -0.108 | -0.004 | 0.027 | -2.099 | -0.015 | 3.58E-02 | 18667 |
| 166 | Red_N_R   | -0.006 | -0.062 | 0.051  | 0.029 | -0.191 | -0.001 | 8.48E-01 | 18667 |

|     |         |        |        |       |       |        |        |          |       |
|-----|---------|--------|--------|-------|-------|--------|--------|----------|-------|
| 167 | LC_L    | -0.001 | -0.020 | 0.019 | 0.010 | -0.054 | 0.000  | 9.57E-01 | 18667 |
| 168 | LC_R    | 0.001  | -0.020 | 0.022 | 0.011 | 0.101  | 0.001  | 9.19E-01 | 18667 |
| 169 | Raphe_D | -0.040 | -0.115 | 0.036 | 0.039 | -1.033 | -0.008 | 3.02E-01 | 18667 |
| 170 | Raphe_M | -0.003 | -0.026 | 0.020 | 0.012 | -0.259 | -0.002 | 7.96E-01 | 18667 |

---

**Table S5: Associations between diet phenotypes (follow-up) and alternative brain structure measures.**

| Field ID | Variable                                         | Coffee intake                |           |           |         |        |        |          | Cereal intake         |           |           |           |         |        |        |          |       |
|----------|--------------------------------------------------|------------------------------|-----------|-----------|---------|--------|--------|----------|-----------------------|-----------|-----------|-----------|---------|--------|--------|----------|-------|
|          |                                                  | beta                         | 95%CI l   | 95%CI h   | se      | t      | r      | p        | df.e                  | beta      | 95%CI l   | 95%CI h   | se      | t      | r      | p        | df.e  |
| 25005    | Volume of grey matter (normalised for head size) | -1424.739                    | -1721.605 | -1127.872 | 151.455 | -9.407 | -0.069 | 5.68E-21 | 18652                 | 760.627   | 572.932   | 948.321   | 95.758  | 7.943  | 0.058  | 2.08E-15 | 18722 |
| 25006    | Volume of grey matter                            | -771.503                     | -1142.405 | -400.601  | 189.227 | -4.077 | -0.030 | 4.58E-05 | 18652                 | 1143.483  | 909.710   | 1377.257  | 119.267 | 9.588  | 0.070  | 1.01E-21 | 18722 |
| 26518    | Volume of TotalGray (whole brain)                | -371.902                     | -611.399  | -132.404  | 122.187 | -3.044 | -0.022 | 2.34E-03 | 18411                 | 641.751   | 490.591   | 792.912   | 77.119  | 8.322  | 0.061  | 9.28E-17 | 18481 |
|          |                                                  | Tea intake                   |           |           |         |        |        |          | Water intake          |           |           |           |         |        |        |          |       |
| 25005    | Volume of grey matter (normalised for head size) | 332.224                      | 121.948   | 542.500   | 107.279 | 3.097  | 0.023  | 1.96E-03 | 18673                 | -706.304  | -984.868  | -427.740  | 142.118 | -4.970 | -0.036 | 6.76E-07 | 18638 |
| 25006    | Volume of grey matter                            | 331.933                      | 69.959    | 593.907   | 133.654 | 2.484  | 0.018  | 1.30E-02 | 18673                 | -43.933   | -391.337  | 303.470   | 177.238 | -0.248 | -0.002 | 8.04E-01 | 18638 |
| 26518    | Volume of TotalGray (whole brain)                | -163.522                     | -332.764  | 5.721     | 86.344  | -1.894 | -0.014 | 5.83E-02 | 18432                 | -101.702  | -326.176  | 122.773   | 114.522 | -0.888 | -0.007 | 3.75E-01 | 18398 |
|          |                                                  | Cooked vegetable intake      |           |           |         |        |        |          | Processed meat intake |           |           |           |         |        |        |          |       |
| 25005    | Volume of grey matter (normalised for head size) | -372.602                     | -722.403  | -22.802   | 178.461 | -2.088 | -0.015 | 3.68E-02 | 18582                 | -687.292  | -1203.363 | -171.221  | 263.289 | -2.610 | -0.019 | 9.05E-03 | 18734 |
| 25006    | Volume of grey matter                            | 232.576                      | -203.868  | 669.020   | 222.665 | 1.045  | 0.008  | 2.96E-01 | 18582                 | -1356.663 | -1999.748 | -713.578  | 328.089 | -4.135 | -0.030 | 3.56E-05 | 18734 |
| 26518    | Volume of TotalGray (whole brain)                | -36.527                      | -318.325  | 245.272   | 143.768 | -0.254 | -0.002 | 7.99E-01 | 18344                 | -314.469  | -730.199  | 101.261   | 212.097 | -1.483 | -0.011 | 1.38E-01 | 18493 |
|          |                                                  | Salad / raw vegetable intake |           |           |         |        |        |          | Poultry intake        |           |           |           |         |        |        |          |       |
| 25005    | Volume of grey matter (normalised for head size) | -256.220                     | -561.706  | 49.266    | 155.853 | -1.644 | -0.012 | 1.00E-01 | 18550                 | 629.399   | 66.272    | 1192.526  | 287.296 | 2.191  | 0.016  | 2.85E-02 | 18739 |
| 25006    | Volume of grey matter                            | -20.031                      | -400.838  | 360.776   | 194.280 | -0.103 | -0.001 | 9.18E-01 | 18550                 | -895.312  | -1597.243 | -193.380  | 358.112 | -2.500 | -0.018 | 1.24E-02 | 18739 |
| 26518    | Volume of TotalGray (whole brain)                | -76.955                      | -323.503  | 169.594   | 125.784 | -0.612 | -0.005 | 5.41E-01 | 18312                 | -236.534  | -690.103  | 217.035   | 231.402 | -1.022 | -0.008 | 3.07E-01 | 18498 |
|          |                                                  | Fresh fruit intake           |           |           |         |        |        |          | Beef intake           |           |           |           |         |        |        |          |       |
| 25005    | Volume of grey matter (normalised for head size) | -103.837                     | -479.250  | 271.575   | 191.528 | -0.542 | -0.004 | 5.88E-01 | 18642                 | -388.421  | -1039.824 | 262.982   | 332.333 | -1.169 | -0.009 | 2.43E-01 | 18720 |
| 25006    | Volume of grey matter                            | 1642.923                     | 1175.225  | 2110.622  | 238.610 | 6.885  | 0.050  | 5.95E-12 | 18642                 | -1987.895 | -2798.565 | -1177.226 | 413.588 | -4.806 | -0.035 | 1.55E-06 | 18720 |
| 26518    | Volume of TotalGray (whole brain)                | 499.420                      | 197.309   | 801.531   | 154.131 | 3.240  | 0.024  | 1.20E-03 | 18402                 | -25.217   | -550.301  | 499.867   | 267.887 | -0.094 | -0.001 | 9.25E-01 | 18480 |
|          |                                                  | Dried fruit intake           |           |           |         |        |        |          | Lamb/mutton intake    |           |           |           |         |        |        |          |       |
| 25005    | Volume of grey matter (normalised for head size) | 470.420                      | 31.853    | 908.987   | 223.748 | 2.102  | 0.015  | 3.55E-02 | 18519                 | -1658.252 | -2486.879 | -829.626  | 422.749 | -3.923 | -0.029 | 8.79E-05 | 18710 |
| 25006    | Volume of grey matter                            | 1557.090                     | 1010.311  | 2103.869  | 278.956 | 5.582  | 0.041  | 2.41E-08 | 18519                 | -1028.257 | -2059.694 | 3.181     | 526.219 | -1.954 | -0.014 | 5.07E-02 | 18710 |
| 26518    | Volume of TotalGray (whole brain)                | 694.765                      | 341.810   | 1047.719  | 180.070 | 3.858  | 0.029  | 1.15E-04 | 18279                 | -599.485  | -1266.132 | 67.161    | 340.110 | -1.763 | -0.013 | 7.80E-02 | 18472 |
|          |                                                  | Bread intake                 |           |           |         |        |        |          | Pork intake           |           |           |           |         |        |        |          |       |
| 25005    | Volume of grey matter (normalised for head size) | 41.042                       | -35.596   | 117.680   | 39.099  | 1.050  | 0.008  | 2.94E-01 | 18608                 | -846.020  | -1612.953 | -79.087   | 391.274 | -2.162 | -0.016 | 3.06E-02 | 18698 |
| 25006    | Volume of grey matter                            | 67.872                       | -27.637   | 163.381   | 48.727  | 1.393  | 0.010  | 1.64E-01 | 18608                 | -2315.315 | -3269.217 | -1361.413 | 486.662 | -4.758 | -0.035 | 1.97E-06 | 18698 |
| 26518    | Volume of TotalGray (whole brain)                | 40.993                       | -20.737   | 102.723   | 31.493  | 1.302  | 0.010  | 1.93E-01 | 18368                 | -554.095  | -1171.163 | 62.974    | 314.816 | -1.760 | -0.013 | 7.84E-02 | 18459 |
|          |                                                  | Oily fish intake             |           |           |         |        |        |          | Cheese intake         |           |           |           |         |        |        |          |       |
| 25005    | Volume of grey matter (normalised for head size) | -805.187                     | -1383.092 | -227.282  | 294.836 | -2.731 | -0.020 | 6.32E-03 | 18726                 | -1156.874 | -1646.154 | -667.594  | 249.621 | -4.635 | -0.034 | 3.60E-06 | 18411 |
| 25006    | Volume of grey matter                            | 1258.133                     | 538.303   | 1977.964  | 367.244 | 3.426  | 0.025  | 6.14E-04 | 18726                 | 1774.561  | 1164.066  | 2385.056  | 311.462 | 5.698  | 0.042  | 1.23E-08 | 18411 |
| 26518    | Volume of TotalGray (whole brain)                | -481.721                     | -947.312  | -16.130   | 237.535 | -2.028 | -0.015 | 4.26E-02 | 18485                 | 316.898   | -78.120   | 711.915   | 201.530 | 1.572  | 0.012  | 1.16E-01 | 18174 |
|          |                                                  | Non-oily fish intake         |           |           |         |        |        |          |                       |           |           |           |         |        |        |          |       |
| 25005    | Volume of grey matter (normalised for head size) | -60.147                      | -739.056  | 618.762   | 346.366 | -0.174 | -0.001 | 8.62E-01 | 18701                 |           |           |           |         |        |        |          |       |
| 25006    | Volume of grey matter                            | 408.881                      | -436.977  | 1254.738  | 431.540 | 0.947  | 0.007  | 3.43E-01 | 18701                 |           |           |           |         |        |        |          |       |
| 26518    | Volume of TotalGray (whole brain)                | -127.781                     | -674.740  | 419.179   | 279.048 | -0.458 | -0.003 | 6.47E-01 | 18460                 |           |           |           |         |        |        |          |       |

**Table S6: Associations between diet phenotypes (baseline) and alternative brain structure measures.**

| Field ID | Variable                                         | beta                                | 95%CI_l   | 95%CI_h  | se      | t      | r      | p        | df.e  | beta      | 95%CI_l                      | 95%CI_h   | se      | t      | r      | p        | df.e  |  |  |
|----------|--------------------------------------------------|-------------------------------------|-----------|----------|---------|--------|--------|----------|-------|-----------|------------------------------|-----------|---------|--------|--------|----------|-------|--|--|
|          |                                                  | <b>Coffee intake</b>                |           |          |         |        |        |          |       |           | <b>Cereal intake</b>         |           |         |        |        |          |       |  |  |
| 25005    | Volume of grey matter (normalised for head size) | -1244.918                           | -1514.548 | -975.288 | 137.560 | -9.050 | -0.066 | 1.57E-19 | 18835 | 717.845   | 522.853                      | 912.837   | 99.481  | 7.216  | 0.052  | 5.56E-13 | 18853 |  |  |
| 25006    | Volume of grey matter                            | -787.633                            | -1124.012 | -451.254 | 171.614 | -4.590 | -0.033 | 4.47E-06 | 18835 | 1230.264  | 987.825                      | 1472.703  | 123.688 | 9.947  | 0.072  | 2.98E-23 | 18853 |  |  |
| 26518    | Volume of TotalGray (whole brain)                | -326.831                            | -544.356  | -109.306 | 110.977 | -2.945 | -0.022 | 3.23E-03 | 18593 | 492.145   | 335.206                      | 649.083   | 80.067  | 6.147  | 0.045  | 8.07E-10 | 18611 |  |  |
|          |                                                  | <b>Tea intake</b>                   |           |          |         |        |        |          |       |           | <b>Water intake</b>          |           |         |        |        |          |       |  |  |
| 25005    | Volume of grey matter (normalised for head size) | 193.235                             | -10.976   | 397.445  | 104.184 | 1.855  | 0.014  | 6.36E-02 | 18776 | -664.794  | -930.073                     | -399.515  | 135.340 | -4.912 | -0.036 | 9.09E-07 | 18751 |  |  |
| 25006    | Volume of grey matter                            | 206.552                             | -47.688   | 460.792  | 129.708 | 1.592  | 0.012  | 1.11E-01 | 18776 | 299.377   | -30.967                      | 629.721   | 168.535 | 1.776  | 0.013  | 7.57E-02 | 18751 |  |  |
| 26518    | Volume of TotalGray (whole brain)                | -255.293                            | -419.458  | -91.127  | 83.754  | -3.048 | -0.022 | 2.31E-03 | 18536 | 87.225    | -126.676                     | 301.125   | 109.128 | 0.799  | 0.006  | 4.24E-01 | 18510 |  |  |
|          |                                                  | <b>Cooked vegetable intake</b>      |           |          |         |        |        |          |       |           | <b>Processed meat intake</b> |           |         |        |        |          |       |  |  |
| 25005    | Volume of grey matter (normalised for head size) | -608.938                            | -1000.666 | -217.210 | 199.852 | -3.047 | -0.022 | 2.32E-03 | 18662 | -91.974   | -607.675                     | 423.727   | 263.101 | -0.350 | -0.003 | 7.27E-01 | 18866 |  |  |
| 25006    | Volume of grey matter                            | 183.021                             | -304.667  | 670.709  | 248.809 | 0.736  | 0.005  | 4.62E-01 | 18662 | -977.930  | -1620.167                    | -335.694  | 327.657 | -2.985 | -0.022 | 2.84E-03 | 18866 |  |  |
| 26518    | Volume of TotalGray (whole brain)                | -298.414                            | -613.893  | 17.065   | 160.951 | -1.854 | -0.014 | 6.37E-02 | 18424 | -284.719  | -699.352                     | 129.914   | 211.538 | -1.346 | -0.010 | 1.78E-01 | 18624 |  |  |
|          |                                                  | <b>Salad / raw vegetable intake</b> |           |          |         |        |        |          |       |           | <b>Poultry intake</b>        |           |         |        |        |          |       |  |  |
| 25005    | Volume of grey matter (normalised for head size) | -294.460                            | -604.037  | 15.117   | 157.940 | -1.864 | -0.014 | 6.23E-02 | 18702 | 424.216   | -154.184                     | 1002.617  | 295.089 | 1.438  | 0.010  | 1.51E-01 | 18864 |  |  |
| 25006    | Volume of grey matter                            | 45.336                              | -339.850  | 430.521  | 196.514 | 0.231  | 0.002  | 8.18E-01 | 18702 | -558.128  | -1278.317                    | 162.062   | 367.427 | -1.519 | -0.011 | 1.29E-01 | 18864 |  |  |
| 26518    | Volume of TotalGray (whole brain)                | -43.430                             | -292.669  | 205.810  | 127.157 | -0.342 | -0.003 | 7.33E-01 | 18461 | -207.959  | -672.779                     | 256.862   | 237.142 | -0.877 | -0.006 | 3.81E-01 | 18622 |  |  |
|          |                                                  | <b>Fresh fruit intake</b>           |           |          |         |        |        |          |       |           | <b>Beef intake</b>           |           |         |        |        |          |       |  |  |
| 25005    | Volume of grey matter (normalised for head size) | -445.746                            | -835.692  | -55.800  | 198.943 | -2.241 | -0.016 | 2.51E-02 | 18762 | -431.630  | -1065.664                    | 202.404   | 323.472 | -1.334 | -0.010 | 1.82E-01 | 18857 |  |  |
| 25006    | Volume of grey matter                            | 1475.899                            | 990.716   | 1961.082 | 247.531 | 5.962  | 0.043  | 2.53E-09 | 18762 | -2020.125 | -2809.062                    | -1231.189 | 402.500 | -5.019 | -0.037 | 5.24E-07 | 18857 |  |  |
| 26518    | Volume of TotalGray (whole brain)                | 292.492                             | -21.378   | 606.363  | 160.130 | 1.827  | 0.013  | 6.78E-02 | 18524 | -203.376  | -713.750                     | 306.998   | 260.383 | -0.781 | -0.006 | 4.35E-01 | 18615 |  |  |
|          |                                                  | <b>Dried fruit intake</b>           |           |          |         |        |        |          |       |           | <b>Lamb/mutton intake</b>    |           |         |        |        |          |       |  |  |
| 25005    | Volume of grey matter (normalised for head size) | 167.201                             | -271.553  | 605.955  | 223.843 | 0.747  | 0.005  | 4.55E-01 | 18646 | -1239.419 | -2022.040                    | -456.798  | 399.278 | -3.104 | -0.023 | 1.91E-03 | 18829 |  |  |
| 25006    | Volume of grey matter                            | 1724.994                            | 1179.381  | 2270.607 | 278.361 | 6.197  | 0.045  | 5.88E-10 | 18646 | -1028.445 | -2003.602                    | -53.288   | 497.506 | -2.067 | -0.015 | 3.87E-02 | 18829 |  |  |
| 26518    | Volume of TotalGray (whole brain)                | 732.298                             | 379.025   | 1085.572 | 180.233 | 4.063  | 0.030  | 4.86E-05 | 18407 | -462.097  | -1091.833                    | 167.639   | 321.279 | -1.438 | -0.011 | 1.50E-01 | 18587 |  |  |
|          |                                                  | <b>Bread intake</b>                 |           |          |         |        |        |          |       |           | <b>Pork intake</b>           |           |         |        |        |          |       |  |  |
| 25005    | Volume of grey matter (normalised for head size) | 95.144                              | 27.103    | 163.184  | 34.713  | 2.741  | 0.020  | 6.13E-03 | 18600 | -592.477  | -1359.919                    | 174.964   | 391.534 | -1.513 | -0.011 | 1.30E-01 | 18828 |  |  |
| 25006    | Volume of grey matter                            | 151.751                             | 67.042    | 236.460  | 43.217  | 3.511  | 0.026  | 4.47E-04 | 18600 | -1924.296 | -2879.792                    | -968.800  | 487.476 | -3.947 | -0.029 | 7.93E-05 | 18828 |  |  |
| 26518    | Volume of TotalGray (whole brain)                | 56.657                              | 1.953     | 111.361  | 27.909  | 2.030  | 0.015  | 4.24E-02 | 18363 | -674.555  | -1291.708                    | -57.403   | 314.859 | -2.142 | -0.016 | 3.22E-02 | 18586 |  |  |
|          |                                                  | <b>Oily fish intake</b>             |           |          |         |        |        |          |       |           | <b>Cheese intake</b>         |           |         |        |        |          |       |  |  |
| 25005    | Volume of grey matter (normalised for head size) | -1229.155                           | -1818.533 | -639.777 | 300.689 | -4.088 | -0.030 | 4.37E-05 | 18843 | -951.753  | -1450.426                    | -453.080  | 254.413 | -3.741 | -0.027 | 1.84E-04 | 18591 |  |  |
| 25006    | Volume of grey matter                            | 795.099                             | 60.778    | 1529.419 | 374.636 | 2.122  | 0.015  | 3.38E-02 | 18843 | 1962.234  | 1341.028                     | 2583.439  | 316.927 | 6.191  | 0.045  | 6.09E-10 | 18591 |  |  |
| 26518    | Volume of TotalGray (whole brain)                | -620.405                            | -1094.933 | -145.876 | 242.095 | -2.563 | -0.019 | 1.04E-02 | 18601 | 283.424   | -119.300                     | 686.147   | 205.461 | 1.379  | 0.010  | 1.68E-01 | 18351 |  |  |
|          |                                                  | <b>Non-oily fish intake</b>         |           |          |         |        |        |          |       |           |                              |           |         |        |        |          |       |  |  |
| 25005    | Volume of grey matter (normalised for head size) | -400.031                            | -1074.846 | 274.785  | 344.278 | -1.162 | -0.008 | 2.45E-01 | 18838 |           |                              |           |         |        |        |          |       |  |  |
| 25006    | Volume of grey matter                            | 671.114                             | -168.946  | 1511.175 | 428.583 | 1.566  | 0.011  | 1.17E-01 | 18838 |           |                              |           |         |        |        |          |       |  |  |
| 26518    | Volume of TotalGray (whole brain)                | -539.435                            | -1082.023 | 3.154    | 276.818 | -1.949 | -0.014 | 5.13E-02 | 18596 |           |                              |           |         |        |        |          |       |  |  |

**Table S7: Genome-wide independent significant variants of cereal intake.**

| CHR | SNP        | BP        | A1 | A2 | N      | BETA     | STAT   | P        | Is lead SNP |
|-----|------------|-----------|----|----|--------|----------|--------|----------|-------------|
| 1   | rs17030613 | 113190807 | C  | A  | 335090 | 0.04525  | 5.465  | 4.63E-08 | yes         |
| 2   | rs10190898 | 60171757  | G  | A  | 334076 | 0.04518  | 5.758  | 8.54E-09 | yes         |
| 3   | rs7618975  | 25086328  | C  | A  | 334112 | 0.03832  | 5.593  | 2.24E-08 | no          |
| 3   | rs4858694  | 25097736  | A  | G  | 334974 | 0.04652  | 6.351  | 2.14E-10 | yes         |
| 3   | rs7643390  | 25174059  | T  | C  | 334844 | 0.03853  | 5.757  | 8.56E-09 | no          |
| 3   | rs720822   | 25232155  | A  | G  | 334631 | 0.03745  | 5.602  | 2.12E-08 | no          |
| 3   | rs1483848  | 25316283  | A  | G  | 334342 | -0.03749 | -5.59  | 2.28E-08 | no          |
| 3   | rs1562502  | 35735596  | T  | C  | 334961 | 0.0374   | 5.483  | 4.20E-08 | yes         |
| 3   | rs2236950  | 50420554  | A  | C  | 335339 | 0.04909  | 5.607  | 2.06E-08 | yes         |
| 5   | rs358288   | 87495504  | G  | A  | 335175 | -0.06738 | -6.725 | 1.76E-11 | yes         |
| 5   | rs11748798 | 87650742  | T  | G  | 334620 | -0.04261 | -5.523 | 3.34E-08 | no          |
| 6   | rs9381903  | 50773228  | A  | G  | 334734 | -0.03654 | -5.46  | 4.76E-08 | yes         |
| 6   | rs13202780 | 51180392  | C  | T  | 334584 | -0.04685 | -6.363 | 1.99E-10 | yes         |
| 6   | rs2504706  | 51258579  | C  | T  | 334485 | 0.05759  | 7.298  | 2.94E-13 | yes         |
| 6   | rs1342613  | 51302471  | T  | G  | 334625 | -0.04519 | -5.622 | 1.89E-08 | no          |
| 6   | rs9401196  | 98274551  | G  | A  | 333167 | -0.04266 | -6.312 | 2.76E-10 | no          |
| 6   | rs7770226  | 98320402  | T  | C  | 334723 | -0.04334 | -6.362 | 1.99E-10 | no          |
| 6   | rs9401305  | 98331937  | C  | A  | 334610 | 0.04835  | 7.204  | 5.87E-13 | yes         |
| 6   | rs9482094  | 98364895  | A  | G  | 334516 | 0.03891  | 5.612  | 2.00E-08 | no          |
| 6   | rs4524616  | 98445008  | C  | A  | 334599 | 0.04724  | 7      | 2.57E-12 | no          |
| 6   | rs4557524  | 98466195  | T  | G  | 334289 | -0.04112 | -6.128 | 8.93E-10 | no          |
| 6   | rs4601136  | 98488771  | G  | A  | 334855 | -0.04232 | -6.27  | 3.61E-10 | no          |
| 6   | rs62422661 | 98545611  | T  | G  | 334865 | 0.04294  | 6.272  | 3.58E-10 | no          |
| 7   | rs10278591 | 1921362   | T  | C  | 334728 | 0.05088  | 5.84   | 5.23E-09 | no          |
| 7   | rs7791299  | 1935598   | C  | T  | 330905 | 0.04897  | 5.458  | 4.83E-08 | no          |
| 7   | rs56259105 | 1978002   | C  | T  | 334205 | 0.0514   | 5.966  | 2.43E-09 | yes         |
| 7   | rs34809719 | 2028968   | T  | G  | 334937 | 0.05096  | 5.896  | 3.73E-09 | no          |
| 7   | rs56226325 | 2078981   | T  | C  | 335026 | 0.0526   | 5.668  | 1.44E-08 | no          |
| 7   | rs4410790  | 17284577  | C  | T  | 334375 | -0.03806 | -5.474 | 4.40E-08 | yes         |
| 8   | rs2670028  | 57423673  | G  | A  | 335051 | -0.04246 | -5.474 | 4.42E-08 | yes         |
| 9   | rs7038814  | 86733355  | G  | A  | 335050 | 0.03847  | 5.567  | 2.60E-08 | no          |
| 9   | rs2799849  | 86752641  | C  | T  | 334839 | 0.04467  | 6.245  | 4.24E-10 | yes         |
| 9   | rs1549314  | 127910307 | G  | T  | 335235 | 0.03781  | 5.644  | 1.66E-08 | yes         |

|    |            |           |   |   |        |          |        |          |     |
|----|------------|-----------|---|---|--------|----------|--------|----------|-----|
| 9  | rs501963   | 127962916 | A | G | 335170 | 0.03682  | 5.495  | 3.90E-08 | no  |
| 11 | rs566534   | 28730053  | C | T | 334372 | 0.04044  | 5.601  | 2.14E-08 | yes |
| 15 | rs12440952 | 74615292  | G | A | 334998 | 0.04206  | 5.991  | 2.09E-09 | no  |
| 15 | rs2959005  | 74618128  | C | T | 335121 | 0.04335  | 6.098  | 1.08E-09 | no  |
| 15 | rs1564782  | 74622678  | G | A | 335313 | 0.04226  | 5.791  | 6.99E-09 | no  |
| 15 | rs4077582  | 74665622  | C | T | 334477 | 0.04236  | 5.785  | 7.28E-09 | no  |
| 15 | rs11856835 | 74716174  | G | A | 333176 | 0.04702  | 7.004  | 2.49E-12 | no  |
| 15 | rs750607   | 74734819  | C | T | 331243 | 0.04175  | 6.141  | 8.19E-10 | no  |
| 15 | rs2470893  | 75019449  | T | C | 333685 | -0.05338 | -7.474 | 7.78E-14 | no  |
| 15 | rs2472297  | 75027880  | T | C | 334995 | -0.05918 | -7.844 | 4.38E-15 | yes |
| 18 | rs12709578 | 1834649   | T | G | 334811 | -0.04464 | -6.543 | 6.05E-11 | no  |
| 18 | rs72867256 | 1849194   | A | G | 335530 | -0.08093 | -5.64  | 1.71E-08 | no  |
| 18 | rs555692   | 1883692   | T | C | 334338 | -0.04216 | -6.274 | 3.53E-10 | no  |
| 18 | rs2289322  | 1884329   | T | G | 334933 | -0.07967 | -8.439 | 3.20E-17 | yes |
| 18 | rs9951259  | 1898350   | A | G | 334936 | -0.04384 | -6.31  | 2.79E-10 | no  |
| 19 | rs78816499 | 42596056  | C | T | 335429 | 0.07298  | 5.548  | 2.90E-08 | yes |
| 19 | rs769449   | 45410002  | A | G | 334498 | 0.05718  | 5.685  | 1.31E-08 | yes |
| 19 | rs2287921  | 49228272  | T | C | 335253 | -0.03858 | -5.751 | 8.89E-09 | no  |
| 19 | rs2287922  | 49232226  | G | A | 334277 | -0.03893 | -5.791 | 7.00E-09 | yes |

---

**Table S8: Genome-wide independent significant variants of coffee intake.**

| CHR | SNP        | BP       | A1 | A2 | N      | BETA     | STAT   | P        | Is lead SNP |
|-----|------------|----------|----|----|--------|----------|--------|----------|-------------|
| 2   | rs62106258 | 417167   | C  | T  | 334871 | -0.06039 | -5.48  | 4.25E-08 | yes         |
| 2   | rs2947411  | 614168   | A  | G  | 334825 | -0.04882 | -7.831 | 4.86E-15 | no          |
| 2   | rs2867125  | 622827   | T  | C  | 334788 | -0.04838 | -7.729 | 1.09E-14 | no          |
| 2   | rs11127485 | 632028   | C  | T  | 333775 | -0.04937 | -7.87  | 3.57E-15 | no          |
| 2   | rs6548238  | 634905   | T  | C  | 334844 | -0.04995 | -7.961 | 1.72E-15 | yes         |
| 2   | rs13393304 | 637830   | A  | G  | 334396 | -0.0495  | -7.862 | 3.81E-15 | no          |
| 2   | rs7561317  | 644953   | A  | G  | 334808 | -0.04936 | -7.884 | 3.17E-15 | no          |
| 2   | rs1260326  | 27730940 | T  | C  | 333668 | -0.03923 | -8.083 | 6.34E-16 | yes         |
| 2   | rs780094   | 27741237 | T  | C  | 334770 | -0.03783 | -7.765 | 8.18E-15 | no          |
| 2   | rs780093   | 27742603 | T  | C  | 334480 | -0.03773 | -7.734 | 1.04E-14 | no          |
| 2   | rs780092   | 27743154 | G  | A  | 334828 | 0.03828  | 5.935  | 2.94E-09 | no          |
| 2   | rs1260333  | 27748624 | A  | G  | 334537 | -0.03502 | -7.337 | 2.19E-13 | no          |
| 2   | rs1919127  | 27801493 | C  | T  | 334293 | -0.03374 | -6.195 | 5.82E-10 | no          |
| 2   | rs1919128  | 27801759 | G  | A  | 334714 | -0.0336  | -6.178 | 6.49E-10 | no          |
| 2   | rs13022873 | 27815510 | C  | A  | 333508 | -0.03247 | -5.933 | 2.97E-09 | no          |
| 2   | rs12987055 | 27834152 | C  | T  | 334340 | -0.03425 | -6.279 | 3.40E-10 | no          |
| 2   | rs3749147  | 27851918 | A  | G  | 334033 | -0.03355 | -6.116 | 9.60E-10 | no          |
| 4   | rs58115360 | 2865107  | T  | C  | 334607 | -0.03048 | -5.832 | 5.47E-09 | yes         |
| 4   | rs6824567  | 2883172  | T  | C  | 334500 | -0.02993 | -5.687 | 1.30E-08 | no          |
| 4   | rs2231164  | 89015857 | C  | T  | 334759 | -0.03846 | -5.472 | 4.46E-08 | no          |
| 4   | rs2231142  | 89052323 | T  | G  | 334794 | -0.05224 | -7.004 | 2.49E-12 | yes         |
| 5   | rs12519880 | 7391434  | A  | C  | 334047 | -0.03241 | -6.158 | 7.39E-10 | yes         |
| 5   | rs1422192  | 87959023 | A  | G  | 333513 | 0.03959  | 6.059  | 1.38E-09 | yes         |
| 5   | rs618741   | 88064012 | C  | T  | 334555 | 0.02698  | 5.627  | 1.84E-08 | no          |
| 5   | rs304132   | 88215594 | A  | G  | 334297 | 0.02629  | 5.487  | 4.09E-08 | yes         |
| 6   | rs2517618  | 30158127 | A  | G  | 334574 | 0.03493  | 5.479  | 4.28E-08 | no          |
| 6   | rs3132649  | 30321057 | A  | G  | 334850 | 0.03683  | 5.517  | 3.44E-08 | no          |
| 6   | rs3094061  | 30321189 | C  | A  | 334728 | 0.03725  | 5.58   | 2.41E-08 | no          |
| 6   | rs3130374  | 30321336 | T  | C  | 334492 | 0.03688  | 5.526  | 3.28E-08 | no          |
| 6   | rs3130375  | 30321732 | A  | C  | 334557 | 0.03704  | 5.542  | 3.00E-08 | no          |
| 6   | rs3131038  | 30734080 | A  | G  | 334432 | 0.03041  | 5.459  | 4.81E-08 | no          |
| 6   | rs1264350  | 30796545 | C  | T  | 334508 | 0.03526  | 5.528  | 3.24E-08 | no          |
| 6   | rs3131787  | 30899524 | C  | T  | 334619 | 0.03198  | 5.558  | 2.73E-08 | no          |

|   |           |          |   |   |        |          |        |          |    |
|---|-----------|----------|---|---|--------|----------|--------|----------|----|
| 6 | rs3095151 | 30900150 | T | G | 334436 | 0.03188  | 5.537  | 3.08E-08 | no |
| 6 | rs3130781 | 30914552 | C | T | 334723 | 0.03179  | 5.534  | 3.13E-08 | no |
| 6 | rs2247056 | 31265490 | T | C | 329376 | 0.02861  | 5.456  | 4.87E-08 | no |
| 6 | rs3094005 | 31465047 | T | G | 334717 | 0.03767  | 5.546  | 2.92E-08 | no |
| 6 | rs3132450 | 31596138 | G | A | 334394 | 0.03919  | 5.647  | 1.63E-08 | no |
| 6 | rs3117582 | 31620520 | G | T | 334928 | 0.03948  | 5.688  | 1.29E-08 | no |
| 6 | rs3132449 | 31626013 | T | C | 334913 | 0.03935  | 5.673  | 1.41E-08 | no |
| 6 | rs805293  | 31688518 | A | T | 334725 | -0.03005 | -6.317 | 2.66E-10 | no |
| 6 | rs3131383 | 31704294 | T | G | 334781 | 0.03933  | 5.666  | 1.46E-08 | no |
| 6 | rs3101018 | 31705864 | T | C | 334725 | 0.03863  | 5.56   | 2.71E-08 | no |
| 6 | rs3130484 | 31715882 | C | T | 334531 | 0.03932  | 5.659  | 1.52E-08 | no |
| 6 | rs3131379 | 31721033 | A | G | 334825 | 0.03925  | 5.654  | 1.57E-08 | no |
| 6 | rs3117574 | 31725230 | A | G | 334841 | 0.04029  | 5.801  | 6.59E-09 | no |
| 6 | rs3131378 | 31725285 | G | A | 334993 | 0.03927  | 5.659  | 1.52E-08 | no |
| 6 | rs3117575 | 31726253 | C | T | 334785 | 0.03926  | 5.659  | 1.52E-08 | no |
| 6 | rs3117577 | 31727474 | G | A | 334706 | 0.0389   | 5.604  | 2.09E-08 | no |
| 6 | rs3115671 | 31734345 | T | G | 334835 | 0.03918  | 5.641  | 1.70E-08 | no |
| 6 | rs3130490 | 31739120 | T | G | 334428 | 0.03985  | 5.714  | 1.10E-08 | no |
| 6 | rs3130679 | 31807540 | G | A | 334074 | 0.04115  | 5.919  | 3.25E-09 | no |
| 6 | rs521977  | 31836827 | T | G | 334634 | 0.03529  | 6.978  | 2.99E-12 | no |
| 6 | rs660594  | 31837250 | G | A | 334649 | 0.03064  | 6.462  | 1.03E-10 | no |
| 6 | rs660550  | 31837277 | C | A | 334773 | 0.03109  | 6.561  | 5.35E-11 | no |
| 6 | rs577272  | 31837963 | G | A | 334268 | 0.03092  | 6.524  | 6.86E-11 | no |
| 6 | rs644827  | 31838441 | T | C | 334745 | 0.03087  | 6.515  | 7.29E-11 | no |
| 6 | rs644774  | 31838490 | C | T | 334692 | 0.03087  | 6.515  | 7.29E-11 | no |
| 6 | rs2242665 | 31839309 | C | T | 334641 | 0.03036  | 6.404  | 1.51E-10 | no |
| 6 | rs3132442 | 31839494 | C | T | 334559 | 0.03035  | 6.409  | 1.47E-10 | no |
| 6 | rs3130482 | 31839782 | C | A | 334577 | 0.0301   | 6.358  | 2.05E-10 | no |
| 6 | rs605203  | 31847012 | C | A | 333769 | 0.03414  | 6.919  | 4.56E-12 | no |
| 6 | rs652888  | 31851234 | G | A | 334334 | 0.03107  | 5.556  | 2.76E-08 | no |
| 6 | rs486416  | 31856070 | G | A | 333954 | 0.03315  | 6.74   | 1.59E-11 | no |
| 6 | rs535586  | 31860337 | T | C | 334532 | 0.03377  | 6.872  | 6.34E-12 | no |
| 6 | rs659445  | 31864304 | G | A | 334444 | 0.03408  | 6.937  | 4.01E-12 | no |
| 6 | rs558702  | 31870326 | A | G | 334803 | 0.03924  | 5.633  | 1.78E-08 | no |
| 6 | rs497309  | 31892484 | C | A | 334859 | 0.03941  | 5.655  | 1.56E-08 | no |



|   |               |          |   |   |        |         |       |          |    |
|---|---------------|----------|---|---|--------|---------|-------|----------|----|
| 6 | rs537160      | 31916400 | A | G | 333501 | 0.0305  | 6.165 | 7.04E-10 | no |
| 6 | rs1270942     | 31918860 | G | A | 334507 | 0.03839 | 5.512 | 3.55E-08 | no |
| 6 | rs630379      | 31922254 | A | C | 334128 | 0.03109 | 6.127 | 8.96E-10 | no |
| 6 | rs440454      | 31927342 | A | G | 333113 | 0.03034 | 5.991 | 2.09E-09 | no |
| 6 | rs419788      | 31928799 | T | C | 334363 | 0.03071 | 6.078 | 1.22E-09 | no |
| 6 | rs437179      | 31929014 | A | C | 333753 | 0.02981 | 5.892 | 3.81E-09 | no |
| 6 | rs410851      | 31936668 | T | C | 334732 | 0.03175 | 6.279 | 3.41E-10 | no |
| 6 | rs389884      | 31940897 | G | A | 333863 | 0.03956 | 5.665 | 1.48E-08 | no |
| 6 | rs389883      | 31947460 | G | T | 334545 | 0.03094 | 6.123 | 9.21E-10 | no |
| 6 | rs1150753     | 32059867 | G | A | 334784 | 0.0398  | 5.702 | 1.18E-08 | no |
| 6 | rs1150752     | 32064726 | C | T | 334792 | 0.03917 | 5.609 | 2.04E-08 | no |
| 6 | rs1269852     | 32080191 | C | G | 334624 | 0.04111 | 5.87  | 4.36E-09 | no |
| 6 | rs3130288     | 32096001 | A | C | 334496 | 0.04071 | 5.808 | 6.32E-09 | no |
| 6 | rs3130349     | 32147696 | A | G | 334807 | 0.03251 | 5.495 | 3.90E-08 | no |
| 6 | rs1062070     | 32148031 | G | A | 334144 | 0.03274 | 5.501 | 3.77E-08 | no |
| 6 | rs3134605     | 32159956 | C | T | 334787 | 0.03295 | 5.759 | 8.45E-09 | no |
| 6 | Affx-28468489 | 32165444 | G | A | 332971 | 0.03604 | 5.642 | 1.68E-08 | no |
| 6 | rs3132947     | 32176782 | T | G | 334211 | 0.03253 | 5.66  | 1.51E-08 | no |
| 6 | rs3096690     | 32194630 | C | G | 334354 | 0.03875 | 5.579 | 2.42E-08 | no |
| 6 | rs6936204     | 32217092 | T | C | 334472 | 0.02707 | 5.527 | 3.27E-08 | no |
| 6 | rs3130320     | 32223258 | T | C | 334395 | 0.0271  | 5.556 | 2.77E-08 | no |
| 6 | rs7756177     | 32289358 | A | G | 334437 | 0.03392 | 5.774 | 7.77E-09 | no |
| 6 | rs3129949     | 32298814 | A | C | 334232 | 0.03078 | 5.55  | 2.86E-08 | no |
| 6 | rs1003878     | 32299822 | A | G | 334584 | 0.03105 | 5.605 | 2.08E-08 | no |
| 6 | rs1265757     | 32302382 | T | C | 334838 | 0.03853 | 5.497 | 3.87E-08 | no |
| 6 | rs2395149     | 32325562 | A | G | 334798 | 0.03821 | 5.456 | 4.87E-08 | no |
| 6 | rs3129927     | 32333827 | C | A | 334725 | 0.03825 | 5.464 | 4.66E-08 | no |
| 6 | rs2858324     | 32660375 | A | G | 332865 | 0.02839 | 5.859 | 4.66E-09 | no |
| 6 | rs2647012     | 32664458 | T | C | 334466 | 0.02876 | 5.963 | 2.48E-09 | no |
| 6 | rs2647003     | 32664880 | T | G | 332652 | 0.02934 | 6.07  | 1.28E-09 | no |
| 6 | rs2647046     | 32668336 | A | C | 334679 | 0.02812 | 5.828 | 5.60E-09 | no |
| 6 | rs2856717     | 32670308 | A | G | 334223 | 0.02792 | 5.787 | 7.15E-09 | no |
| 6 | rs2858305     | 32670464 | G | T | 332198 | 0.02661 | 5.473 | 4.42E-08 | no |
| 6 | rs9275572     | 32678999 | A | G | 334631 | 0.02617 | 5.466 | 4.61E-08 | no |
| 6 | rs9275596     | 32681631 | C | T | 329449 | 0.02714 | 5.535 | 3.11E-08 | no |

|   |               |          |    |   |        |          |        |           |     |
|---|---------------|----------|----|---|--------|----------|--------|-----------|-----|
| 6 | rs2504706     | 51258579 | C  | T | 333860 | -0.03371 | -6.027 | 1.67E-09  | yes |
| 7 | rs7805128     | 17106017 | G  | T | 333705 | -0.02893 | -6.062 | 1.35E-09  | yes |
| 7 | rs6973364     | 17160612 | T  | C | 333541 | 0.02894  | 5.902  | 3.59E-09  | no  |
| 7 | rs10950647    | 17196529 | G  | A | 334015 | -0.04465 | -9.378 | 6.79E-21  | yes |
| 7 | rs112476491   | 17204040 | A  | G | 334464 | -0.07753 | -5.812 | 6.17E-09  | no  |
| 7 | rs4721583     | 17215812 | G  | A | 334196 | 0.0335   | 5.934  | 2.95E-09  | no  |
| 7 | rs13328338    | 17221091 | G  | A | 333272 | 0.02655  | 5.455  | 4.90E-08  | no  |
| 7 | rs4476901     | 17243954 | G  | A | 334362 | 0.05193  | 7.54   | 4.70E-14  | yes |
| 7 | rs74919529    | 17269707 | T  | C | 327881 | -0.07873 | -6.436 | 1.23E-10  | yes |
| 7 | Affx-30120430 | 17273374 | CT | C | 334700 | -0.05107 | -9.319 | 1.18E-20  | no  |
| 7 | rs12539940    | 17275597 | C  | T | 334196 | 0.0532   | 5.903  | 3.56E-09  | no  |
| 7 | rs78707595    | 17279393 | T  | C | 334876 | 0.111    | 7.263  | 3.80E-13  | no  |
| 7 | rs4410790     | 17284577 | C  | T | 333749 | 0.12     | 24.37  | 4.71E-131 | yes |
| 7 | rs1117203     | 17303549 | A  | G | 334210 | -0.05868 | -11.03 | 2.74E-28  | no  |
| 7 | rs12670403    | 17309279 | C  | A | 334606 | -0.09552 | -20.18 | 1.72E-90  | no  |
| 7 | rs111577430   | 17319257 | G  | A | 332704 | -0.1144  | -6.143 | 8.12E-10  | no  |
| 7 | rs10272066    | 17374902 | C  | T | 333280 | -0.07016 | -12.48 | 1.01E-35  | yes |
| 7 | rs2066853     | 17379110 | A  | G | 334344 | -0.08551 | -11.1  | 1.23E-28  | no  |
| 7 | rs113070557   | 17382217 | G  | T | 334679 | -0.1239  | -7.813 | 5.60E-15  | yes |
| 7 | rs62446370    | 17404160 | A  | G | 334181 | 0.06413  | 5.972  | 2.35E-09  | yes |
| 7 | rs2198497     | 17414133 | G  | A | 325214 | -0.05438 | -8.801 | 1.36E-18  | no  |
| 7 | rs11764350    | 17422113 | T  | A | 331955 | -0.03137 | -5.977 | 2.28E-09  | no  |
| 7 | rs80265229    | 17465828 | T  | C | 334506 | 0.05936  | 7.855  | 4.02E-15  | yes |
| 7 | rs2034684     | 17475607 | C  | T | 333131 | 0.04152  | 7.626  | 2.44E-14  | no  |
| 7 | rs74789644    | 17488791 | G  | C | 333474 | -0.07512 | -7.709 | 1.27E-14  | yes |
| 7 | rs606056      | 17501082 | C  | A | 333974 | -0.03453 | -7.242 | 4.44E-13  | no  |
| 7 | rs4721617     | 17507948 | G  | A | 334420 | 0.04506  | 8.25   | 1.58E-16  | no  |
| 7 | rs6963451     | 17517644 | G  | T | 334350 | -0.06862 | -9.524 | 1.68E-21  | no  |
| 7 | rs11761325    | 17552884 | A  | G | 332012 | -0.03797 | -6.615 | 3.71E-11  | yes |
| 7 | rs4717763     | 72825125 | A  | G | 334128 | 0.02666  | 5.535  | 3.11E-08  | no  |
| 7 | rs71556711    | 72854549 | T  | C | 334600 | 0.04771  | 5.788  | 7.13E-09  | no  |
| 7 | rs2240466     | 72856269 | A  | G | 334858 | 0.05365  | 7.475  | 7.75E-14  | no  |
| 7 | rs1178979     | 72856430 | C  | T | 334695 | 0.04142  | 6.97   | 3.18E-12  | no  |
| 7 | rs714052      | 72864869 | G  | A | 333967 | 0.05312  | 7.411  | 1.26E-13  | no  |
| 7 | rs12056034    | 72878645 | G  | A | 332370 | 0.05353  | 7.467  | 8.25E-14  | no  |

|    |               |          |   |   |        |          |        |          |     |
|----|---------------|----------|---|---|--------|----------|--------|----------|-----|
| 7  | rs17145713    | 72904810 | T | C | 334453 | 0.04116  | 6.922  | 4.47E-12 | no  |
| 7  | rs13233571    | 72971231 | T | C | 334401 | 0.05561  | 7.744  | 9.63E-15 | no  |
| 7  | rs17145738    | 72982874 | T | C | 334610 | 0.05516  | 7.665  | 1.79E-14 | no  |
| 7  | rs2286276     | 72987354 | T | C | 334711 | 0.03813  | 7.281  | 3.32E-13 | no  |
| 7  | rs1051921     | 73007943 | A | G | 334795 | 0.04321  | 7.29   | 3.12E-13 | no  |
| 7  | rs35332062    | 73012042 | A | G | 334765 | 0.05382  | 7.609  | 2.77E-14 | no  |
| 7  | rs35368205    | 73017657 | T | C | 334026 | 0.04288  | 7.25   | 4.17E-13 | no  |
| 7  | rs3812316     | 73020337 | G | C | 334937 | 0.05593  | 7.924  | 2.31E-15 | yes |
| 7  | rs17145750    | 73026378 | T | C | 334165 | 0.04697  | 7.305  | 2.78E-13 | no  |
| 7  | rs34958196    | 73043101 | A | G | 334255 | 0.05462  | 7.751  | 9.13E-15 | no  |
| 7  | rs41299460    | 75600951 | A | G | 333784 | 0.03619  | 7.414  | 1.23E-13 | no  |
| 7  | rs1057868     | 75615006 | T | C | 334836 | 0.06098  | 11.65  | 2.36E-31 | yes |
| 7  | rs17685       | 75616105 | A | G | 334742 | 0.0589   | 11.16  | 6.37E-29 | no  |
| 7  | rs8565        | 75630274 | T | C | 334610 | 0.05392  | 10.08  | 7.05E-24 | no  |
| 7  | Affx-30886472 | 75659815 | T | C | 334235 | 0.04213  | 8.163  | 3.29E-16 | no  |
| 7  | rs61303167    | 75671175 | T | G | 334555 | 0.04507  | 7.09   | 1.35E-12 | no  |
| 7  | rs79859948    | 75679099 | G | A | 334402 | 0.04716  | 5.991  | 2.08E-09 | no  |
| 7  | rs74999892    | 75756464 | C | T | 333917 | 0.04668  | 5.929  | 3.06E-09 | no  |
| 7  | rs56343450    | 75796235 | T | C | 334424 | 0.04232  | 8.209  | 2.24E-16 | no  |
| 7  | rs78663390    | 75845837 | A | C | 333340 | 0.04387  | 6.671  | 2.55E-11 | no  |
| 12 | rs2599415     | 11217237 | G | A | 331414 | 0.03613  | 5.635  | 1.75E-08 | no  |
| 12 | rs61928609    | 11316437 | A | C | 334259 | 0.03771  | 5.893  | 3.81E-09 | yes |
| 12 | rs1669413     | 11338781 | C | A | 334631 | 0.03721  | 5.832  | 5.48E-09 | no  |
| 12 | rs1669424     | 11346562 | T | C | 334480 | 0.03636  | 5.696  | 1.23E-08 | no  |
| 15 | rs12914489    | 74187937 | A | G | 334708 | 0.06171  | 8.106  | 5.25E-16 | yes |
| 15 | rs5742914     | 74286929 | T | C | 334713 | 0.06184  | 8.463  | 2.61E-17 | no  |
| 15 | Affx-11962945 | 74467796 | T | C | 334262 | 0.05894  | 10.3   | 6.99E-25 | no  |
| 15 | rs1052622     | 74467856 | G | A | 334191 | 0.04713  | 9.292  | 1.52E-20 | yes |
| 15 | rs34868798    | 74469716 | C | T | 334744 | 0.05902  | 10.34  | 4.93E-25 | no  |
| 15 | rs351224      | 74487036 | A | T | 333823 | -0.03089 | -6.476 | 9.42E-11 | no  |
| 15 | rs11857410    | 74488424 | A | G | 334671 | 0.06163  | 10.76  | 5.37E-27 | no  |
| 15 | rs74922218    | 74516615 | A | C | 331201 | 0.09201  | 5.543  | 2.98E-08 | no  |
| 15 | rs11635191    | 74550050 | A | C | 334055 | -0.03848 | -6.468 | 9.95E-11 | no  |
| 15 | rs12916871    | 74552742 | C | A | 334352 | 0.04682  | 9.796  | 1.18E-22 | no  |
| 15 | rs28395230    | 74557835 | C | T | 327973 | -0.04784 | -8.068 | 7.17E-16 | yes |

|    |             |          |   |   |        |          |        |           |     |
|----|-------------|----------|---|---|--------|----------|--------|-----------|-----|
| 15 | rs1038436   | 74560566 | C | T | 333734 | -0.03851 | -7.445 | 9.69E-14  | no  |
| 15 | rs16967313  | 74561301 | A | G | 333238 | -0.04426 | -6.706 | 2.00E-11  | no  |
| 15 | rs901130    | 74573907 | G | C | 334384 | -0.0339  | -6.429 | 1.28E-10  | no  |
| 15 | rs4887131   | 74598757 | A | C | 334065 | -0.04562 | -9.224 | 2.88E-20  | no  |
| 15 | rs1009176   | 74603484 | T | C | 334865 | -0.05065 | -7.546 | 4.50E-14  | no  |
| 15 | rs12440952  | 74615292 | G | A | 334370 | -0.05075 | -10.2  | 1.99E-24  | no  |
| 15 | rs2959005   | 74618128 | C | T | 334493 | -0.05076 | -10.07 | 7.26E-24  | no  |
| 15 | rs1564782   | 74622678 | G | A | 334687 | -0.04932 | -9.534 | 1.52E-21  | no  |
| 15 | rs4077582   | 74665622 | C | T | 333853 | -0.04874 | -9.388 | 6.12E-21  | no  |
| 15 | rs28362906  | 74711790 | A | G | 334407 | 0.1034   | 10.49  | 1.02E-25  | no  |
| 15 | rs11856835  | 74716174 | G | A | 332558 | -0.07035 | -14.79 | 1.85E-49  | no  |
| 15 | rs8036030   | 74716609 | A | G | 334554 | -0.06242 | -12.78 | 2.11E-37  | no  |
| 15 | rs750607    | 74734819 | C | T | 330624 | -0.05822 | -12.08 | 1.32E-33  | no  |
| 15 | rs35032603  | 74753425 | C | T | 334391 | 0.1195   | 9.549  | 1.32E-21  | yes |
| 15 | rs80025017  | 74845566 | A | C | 333788 | -0.05471 | -6.15  | 7.77E-10  | no  |
| 15 | rs62005806  | 74883323 | A | G | 334239 | 0.1111   | 12.28  | 1.25E-34  | no  |
| 15 | rs4128436   | 74935894 | T | C | 334374 | -0.05794 | -6.667 | 2.62E-11  | yes |
| 15 | rs145923939 | 74961238 | C | T | 334541 | 0.1073   | 5.874  | 4.27E-09  | yes |
| 15 | rs2606345   | 75017176 | C | A | 333843 | -0.05203 | -10.28 | 8.67E-25  | no  |
| 15 | rs2470893   | 75019449 | T | C | 333057 | 0.1174   | 23.19  | 7.37E-119 | no  |
| 15 | rs2472297   | 75027880 | T | C | 334365 | 0.1419   | 26.55  | 4.20E-155 | yes |
| 15 | rs2472299   | 75033400 | A | G | 334699 | -0.06438 | -12.1  | 1.13E-33  | no  |
| 15 | rs762551    | 75041917 | C | A | 334695 | -0.06331 | -11.89 | 1.33E-32  | no  |
| 15 | rs45468096  | 75043539 | T | C | 334638 | -0.4812  | -9.012 | 2.04E-19  | yes |
| 15 | rs28399419  | 75043669 | T | C | 334414 | -0.157   | -6.45  | 1.12E-10  | yes |
| 15 | rs2472304   | 75044238 | G | A | 334693 | -0.06658 | -13.22 | 6.90E-40  | no  |
| 15 | rs2470890   | 75047426 | C | T | 334575 | -0.06623 | -13.15 | 1.78E-39  | no  |
| 15 | rs936226    | 75069282 | C | T | 333752 | -0.06121 | -11.31 | 1.15E-29  | no  |
| 15 | rs1378942   | 75077367 | C | A | 334640 | -0.06221 | -12.26 | 1.56E-34  | no  |
| 15 | rs34862454  | 75101530 | C | T | 333910 | -0.06001 | -11.87 | 1.79E-32  | no  |
| 15 | rs6495122   | 75125645 | A | C | 334609 | -0.0615  | -12.74 | 3.73E-37  | no  |
| 15 | rs55973697  | 75129584 | C | A | 334682 | 0.1299   | 7.295  | 3.00E-13  | yes |
| 15 | rs12898397  | 75130093 | T | C | 334075 | -0.05828 | -11.85 | 2.26E-32  | no  |
| 15 | rs4886615   | 75131661 | A | G | 334646 | -0.05062 | -9.538 | 1.47E-21  | no  |
| 15 | rs6938      | 75136261 | C | G | 332531 | -0.05281 | -10.16 | 2.91E-24  | yes |

|    |             |          |   |   |        |          |        |          |     |
|----|-------------|----------|---|---|--------|----------|--------|----------|-----|
| 15 | rs2305668   | 75142761 | G | T | 334547 | -0.04528 | -6.004 | 1.93E-09 | no  |
| 15 | rs11630918  | 75155896 | C | T | 334268 | -0.05996 | -12.53 | 5.51E-36 | no  |
| 15 | rs12911254  | 75166335 | G | A | 334247 | -0.05757 | -12.04 | 2.11E-33 | no  |
| 15 | rs1130741   | 75189930 | A | G | 334515 | -0.05355 | -11.17 | 5.71E-29 | no  |
| 15 | rs6495127   | 75194490 | C | T | 334241 | -0.04989 | -9.522 | 1.71E-21 | no  |
| 15 | rs12907898  | 75207872 | C | T | 332523 | -0.05264 | -10.94 | 7.82E-28 | no  |
| 15 | rs12912839  | 75221245 | C | T | 331594 | -0.05774 | -12.04 | 2.17E-33 | no  |
| 15 | rs12912343  | 75251041 | C | G | 334644 | -0.0632  | -13.32 | 1.76E-40 | no  |
| 15 | rs6495133   | 75255458 | G | C | 334278 | -0.04834 | -7.635 | 2.26E-14 | yes |
| 15 | rs62029217  | 75261899 | C | T | 334406 | -0.06298 | -13.27 | 3.56E-40 | no  |
| 15 | rs12050759  | 75265191 | A | G | 334337 | -0.0411  | -8.011 | 1.14E-15 | no  |
| 15 | rs11636892  | 75266049 | G | C | 333799 | -0.06189 | -13.04 | 7.30E-39 | no  |
| 15 | rs34359839  | 75274669 | G | A | 334369 | -0.049   | -7.005 | 2.48E-12 | no  |
| 15 | rs3812945   | 75289722 | C | T | 334093 | 0.06489  | 13.69  | 1.26E-42 | no  |
| 15 | rs8030089   | 75290377 | T | C | 334530 | -0.03527 | -5.815 | 6.07E-09 | no  |
| 15 | rs2289582   | 75310394 | C | T | 334353 | -0.03371 | -5.543 | 2.98E-08 | no  |
| 15 | rs8042558   | 75320433 | T | G | 333921 | -0.04071 | -7.276 | 3.44E-13 | no  |
| 15 | rs12916473  | 75321999 | A | G | 334474 | 0.1124   | 8.899  | 5.67E-19 | no  |
| 15 | rs34835684  | 75331805 | G | T | 334240 | -0.03366 | -5.564 | 2.64E-08 | no  |
| 15 | rs8043181   | 75380424 | C | T | 334740 | -0.03479 | -5.946 | 2.75E-09 | no  |
| 15 | rs12148488  | 75382542 | T | G | 330604 | -0.0604  | -12.62 | 1.77E-36 | no  |
| 15 | rs8034281   | 75384227 | T | C | 334596 | -0.04834 | -9.869 | 5.73E-23 | no  |
| 15 | rs11638746  | 75403108 | C | A | 334380 | -0.04516 | -8.635 | 5.92E-18 | no  |
| 15 | rs1602360   | 75420761 | G | A | 320676 | -0.04432 | -8.21  | 2.22E-16 | no  |
| 15 | rs34511319  | 75429717 | A | C | 334246 | -0.04708 | -8.739 | 2.36E-18 | no  |
| 15 | rs8025412   | 75444033 | C | T | 334634 | -0.04602 | -9.127 | 7.08E-20 | no  |
| 15 | rs58201389  | 75446835 | G | A | 334383 | -0.04643 | -9.201 | 3.56E-20 | no  |
| 15 | rs8040372   | 75450557 | A | G | 334113 | -0.04843 | -9.847 | 7.11E-23 | no  |
| 15 | rs7170378   | 75457490 | T | C | 333733 | -0.04431 | -9.065 | 1.25E-19 | no  |
| 15 | rs11072530  | 75458850 | G | A | 334606 | -0.04472 | -9.091 | 9.85E-20 | no  |
| 15 | rs2201002   | 75463150 | G | A | 334109 | -0.04453 | -9.127 | 7.05E-20 | yes |
| 15 | rs1873379   | 75498744 | C | G | 330117 | 0.05366  | 10.2   | 1.99E-24 | no  |
| 15 | rs1984586   | 75607479 | A | G | 333858 | 0.04335  | 8.16   | 3.37E-16 | no  |
| 15 | rs55653892  | 75610684 | C | G | 334603 | 0.0418   | 7.816  | 5.45E-15 | no  |
| 15 | rs111858375 | 75614821 | A | C | 334649 | 0.04288  | 8.089  | 6.02E-16 | no  |

|    |               |          |   |    |        |          |        |          |     |
|----|---------------|----------|---|----|--------|----------|--------|----------|-----|
| 15 | rs115991344   | 75614973 | T | C  | 334625 | 0.04218  | 7.96   | 1.73E-15 | no  |
| 15 | rs77532275    | 75690292 | C | A  | 334767 | 0.04236  | 7.932  | 2.16E-15 | no  |
| 15 | rs75782768    | 75692186 | T | C  | 334498 | 0.04237  | 7.923  | 2.33E-15 | no  |
| 15 | rs112994348   | 75698201 | T | C  | 332588 | 0.06587  | 6.421  | 1.36E-10 | no  |
| 15 | rs34608804    | 75718459 | C | T  | 333648 | 0.06845  | 5.749  | 8.99E-09 | no  |
| 15 | rs78428611    | 75738292 | A | C  | 334565 | 0.04254  | 7.956  | 1.79E-15 | no  |
| 15 | rs117174465   | 75753810 | G | A  | 334669 | 0.1026   | 5.941  | 2.83E-09 | no  |
| 15 | rs76550488    | 75757050 | C | G  | 334164 | 0.04422  | 8.27   | 1.35E-16 | no  |
| 15 | rs80163632    | 75763377 | G | A  | 334120 | 0.04364  | 8.164  | 3.26E-16 | no  |
| 15 | rs78521534    | 75769347 | T | C  | 322729 | 0.05104  | 7.273  | 3.51E-13 | yes |
| 15 | rs79471369    | 75771103 | C | T  | 334515 | 0.04391  | 8.22   | 2.04E-16 | no  |
| 15 | rs76063558    | 75775476 | A | G  | 334488 | 0.04374  | 8.181  | 2.82E-16 | no  |
| 15 | rs77716675    | 75781554 | G | A  | 334320 | 0.04352  | 8.135  | 4.14E-16 | no  |
| 15 | rs76621678    | 75844953 | T | C  | 334424 | 0.03877  | 6.164  | 7.09E-10 | no  |
| 15 | rs118028692   | 75847217 | A | C  | 334272 | 0.08481  | 6.081  | 1.20E-09 | no  |
| 15 | rs74845979    | 75912699 | T | C  | 334730 | 0.04398  | 8.098  | 5.59E-16 | no  |
| 15 | rs78911138    | 76275641 | T | G  | 333859 | 0.06926  | 6.872  | 6.35E-12 | yes |
| 15 | rs868299      | 77873549 | A | G  | 333986 | -0.02731 | -5.534 | 3.14E-08 | yes |
| 15 | rs11330240    | 91428521 | C | CT | 334276 | -0.02757 | -5.459 | 4.80E-08 | no  |
| 15 | rs7497304     | 91429176 | T | G  | 334505 | -0.02761 | -5.467 | 4.57E-08 | yes |
| 16 | rs9940128     | 53800754 | A | G  | 334223 | 0.03791  | 7.899  | 2.83E-15 | no  |
| 16 | rs1421085     | 53800954 | C | T  | 334254 | 0.03859  | 7.987  | 1.39E-15 | no  |
| 16 | rs1121980     | 53809247 | A | G  | 334456 | 0.03797  | 7.916  | 2.45E-15 | no  |
| 16 | rs17817449    | 53813367 | G | T  | 334387 | 0.03819  | 7.876  | 3.39E-15 | no  |
| 16 | rs8050136     | 53816275 | A | C  | 334609 | 0.03826  | 7.887  | 3.10E-15 | no  |
| 16 | rs3751812     | 53818460 | T | G  | 334637 | 0.03817  | 7.873  | 3.49E-15 | no  |
| 16 | rs9939609     | 53820527 | A | T  | 334878 | 0.03806  | 7.856  | 3.99E-15 | no  |
| 16 | rs7202116     | 53821615 | G | A  | 334500 | 0.03805  | 7.847  | 4.28E-15 | no  |
| 16 | rs9941349     | 53825488 | T | C  | 333785 | 0.03866  | 8.004  | 1.21E-15 | yes |
| 16 | rs9930506     | 53830465 | G | A  | 331183 | 0.03627  | 7.558  | 4.12E-14 | no  |
| 16 | rs9922619     | 53831771 | T | G  | 333782 | 0.03659  | 7.64   | 2.18E-14 | no  |
| 16 | rs12149832    | 53842908 | A | G  | 334593 | 0.03723  | 7.739  | 1.01E-14 | no  |
| 16 | rs11642841    | 53845487 | A | C  | 334752 | 0.03354  | 6.938  | 3.97E-12 | no  |
| 17 | Affx-13612776 | 17579861 | G | C  | 334321 | -0.02699 | -5.701 | 1.20E-08 | no  |
| 17 | rs11649804    | 17696755 | A | C  | 334655 | -0.03184 | -6.105 | 1.03E-09 | yes |

|    |            |          |   |   |        |          |        |          |     |
|----|------------|----------|---|---|--------|----------|--------|----------|-----|
| 17 | rs12936927 | 17726965 | C | T | 334125 | -0.02897 | -5.802 | 6.56E-09 | no  |
| 17 | rs3744115  | 17749822 | G | A | 334674 | -0.02754 | -5.534 | 3.13E-08 | no  |
| 17 | rs11078405 | 17824978 | T | G | 334446 | -0.02901 | -5.914 | 3.35E-09 | no  |
| 18 | rs4121765  | 57730096 | G | A | 334400 | 0.02963  | 5.747  | 9.07E-09 | no  |
| 18 | rs36030660 | 57735945 | C | T | 334167 | 0.03778  | 7.066  | 1.60E-12 | no  |
| 18 | rs7240566  | 57744189 | G | A | 334589 | 0.04109  | 7.498  | 6.49E-14 | no  |
| 18 | rs35981845 | 57758860 | G | A | 334533 | 0.02991  | 5.961  | 2.50E-09 | no  |
| 18 | rs633265   | 57831468 | T | G | 334409 | 0.02662  | 5.579  | 2.42E-08 | no  |
| 18 | rs571312   | 57839769 | A | C | 334744 | 0.04742  | 8.489  | 2.09E-17 | no  |
| 18 | rs589850   | 57841891 | A | G | 334385 | 0.02726  | 5.718  | 1.08E-08 | no  |
| 18 | rs1350341  | 57842533 | A | G | 334624 | 0.02708  | 5.683  | 1.33E-08 | no  |
| 18 | rs17782313 | 57851097 | C | T | 334156 | 0.04803  | 8.576  | 9.86E-18 | no  |
| 18 | rs10871777 | 57851763 | G | A | 334610 | 0.04878  | 8.774  | 1.74E-18 | yes |
| 18 | rs489693   | 57882787 | A | C | 334587 | 0.03563  | 7.052  | 1.77E-12 | no  |
| 18 | rs12970134 | 57884750 | A | G | 334334 | 0.0418   | 7.815  | 5.50E-15 | no  |
| 19 | rs3810291  | 47569003 | G | A | 334674 | -0.0284  | -5.611 | 2.01E-08 | yes |
| 20 | rs6062359  | 62900380 | G | T | 333934 | 0.03034  | 6.344  | 2.24E-10 | yes |

**Table S9: Shared lead SNPs of the cereal and coffee intake.**

| SNP information |           |          |    |    | Cereal intake |         |         |       |       |        |          | Coffee intake |        |         |         |       |       |        |           |        |
|-----------------|-----------|----------|----|----|---------------|---------|---------|-------|-------|--------|----------|---------------|--------|---------|---------|-------|-------|--------|-----------|--------|
| CHR             | SNP       | BP       | A1 | A2 | beta          | 95%CI_l | 95%CI_h | se    | t     | r      | p        | df.e          | beta   | 95%CI_l | 95%CI_h | se    | t     | r      | p         | df.e   |
| 6               | rs2504706 | 51258579 | C  | T  | 0.058         | 0.042   | 0.073   | 0.008 | 7.30  | 0.013  | 2.94E-13 | 334441        | -0.034 | -0.045  | -0.023  | 0.006 | -6.03 | -0.010 | 1.67E-09  | 333816 |
| 7               | rs4410790 | 17284577 | C  | T  | -0.038        | -0.052  | -0.024  | 0.007 | -5.47 | -0.010 | 4.40E-08 | 334331        | 0.120  | 0.110   | 0.130   | 0.005 | 24.37 | 0.042  | 4.71E-131 | 333705 |
| 15              | rs2472297 | 75027880 | T  | C  | -0.059        | -0.074  | -0.044  | 0.008 | -7.84 | -0.014 | 4.38E-15 | 334951        | 0.142  | 0.131   | 0.152   | 0.005 | 26.55 | 0.046  | 4.20E-155 | 334321 |



**Table S10: Associations between SNPs and diets.**

| Variable                     | rs2504706_C |         |         |       |       |        |          |        | rs4410790_C |         |         |       |        |        |          |        | rs2472297_T |         |         |       |        |        |          |        |
|------------------------------|-------------|---------|---------|-------|-------|--------|----------|--------|-------------|---------|---------|-------|--------|--------|----------|--------|-------------|---------|---------|-------|--------|--------|----------|--------|
|                              | beta        | 95%CI_l | 95%CI_h | se    | t     | r      | p        | df.e   | beta        | 95%CI_l | 95%CI_h | se    | t      | r      | p        | df.e   | beta        | 95%CI_l | 95%CI_h | se    | t      | r      | p        | df.e   |
| Water intake                 | 0.012       | 0.001   | 0.024   | 0.006 | 2.13  | 0.004  | 3.28E-02 | 331990 | -0.075      | -0.085  | -0.065  | 0.005 | -14.64 | -0.025 | 1.65E-48 | 331879 | -0.086      | -0.097  | -0.076  | 0.006 | -15.62 | -0.027 | 5.53E-55 | 332497 |
| Tea intake                   | 0.057       | 0.043   | 0.071   | 0.007 | 7.73  | 0.013  | 1.05E-14 | 332621 | 0.111       | 0.098   | 0.123   | 0.006 | 17.04  | 0.030  | 4.58E-65 | 332509 | 0.148       | 0.134   | 0.162   | 0.007 | 21.03  | 0.036  | 3.82E-98 | 333124 |
| Cooked vegetable intake      | -0.001      | -0.008  | 0.007   | 0.004 | -0.16 | 0.000  | 8.70E-01 | 329048 | 0.003       | -0.004  | 0.010   | 0.003 | 0.85   | 0.001  | 3.94E-01 | 328938 | -0.005      | -0.012  | 0.003   | 0.004 | -1.27  | -0.002 | 2.06E-01 | 329549 |
| Salad / raw vegetable intake | 0.011       | 0.001   | 0.020   | 0.005 | 2.25  | 0.004  | 2.42E-02 | 330099 | -0.009      | -0.017  | 0.000   | 0.004 | -2.01  | -0.004 | 4.42E-02 | 329995 | -0.005      | -0.014  | 0.004   | 0.005 | -1.12  | -0.002 | 2.62E-01 | 330603 |
| Fresh fruit intake           | 0.034       | 0.026   | 0.042   | 0.004 | 8.53  | 0.015  | 1.53E-17 | 333101 | -0.012      | -0.019  | -0.005  | 0.004 | -3.45  | -0.006 | 5.59E-04 | 332986 | -0.020      | -0.027  | -0.013  | 0.004 | -5.24  | -0.009 | 1.56E-07 | 333615 |
| Dried fruit intake           | 0.012       | 0.005   | 0.018   | 0.003 | 3.44  | 0.006  | 5.86E-04 | 329367 | -0.003      | -0.009  | 0.003   | 0.003 | -0.94  | -0.002 | 3.45E-01 | 329257 | -0.003      | -0.009  | 0.003   | 0.003 | -0.91  | -0.002 | 3.63E-01 | 329872 |
| Bread intake                 | -0.042      | -0.085  | 0.002   | 0.022 | -1.89 | -0.003 | 5.92E-02 | 329979 | 0.041       | 0.003   | 0.080   | 0.020 | 2.12   | 0.004  | 3.43E-02 | 329867 | 0.051       | 0.009   | 0.092   | 0.021 | 2.39   | 0.004  | 1.70E-02 | 330482 |
| Oily fish intake             | 0.002       | -0.003  | 0.007   | 0.003 | 0.82  | 0.001  | 4.10E-01 | 333791 | -0.001      | -0.005  | 0.004   | 0.002 | -0.25  | 0.000  | 8.04E-01 | 333675 | 0.002       | -0.003  | 0.007   | 0.002 | 0.85   | 0.001  | 3.95E-01 | 334293 |
| Non-oily fish intake         | -0.008      | -0.012  | -0.003  | 0.002 | -3.49 | -0.006 | 4.82E-04 | 333746 | -0.002      | -0.006  | 0.001   | 0.002 | -1.22  | -0.002 | 2.22E-01 | 333631 | -0.003      | -0.007  | 0.001   | 0.002 | -1.56  | -0.003 | 1.19E-01 | 334248 |
| Processed meat intake        | 0.004       | -0.002  | 0.010   | 0.003 | 1.41  | 0.002  | 1.60E-01 | 334794 | 0.007       | 0.002   | 0.012   | 0.003 | 2.73   | 0.005  | 6.36E-03 | 334680 | 0.006       | 0.001   | 0.011   | 0.003 | 2.19   | 0.004  | 2.89E-02 | 335299 |
| Poultry intake               | 0.001       | -0.004  | 0.006   | 0.002 | 0.54  | 0.001  | 5.89E-01 | 334720 | 0.003       | -0.002  | 0.007   | 0.002 | 1.15   | 0.002  | 2.51E-01 | 334607 | -0.001      | -0.006  | 0.003   | 0.002 | -0.54  | -0.001 | 5.87E-01 | 335227 |
| Beef intake                  | 0.005       | 0.001   | 0.010   | 0.002 | 2.25  | 0.004  | 2.41E-02 | 334023 | 0.002       | -0.002  | 0.007   | 0.002 | 1.19   | 0.002  | 2.35E-01 | 333914 | 0.003       | -0.002  | 0.007   | 0.002 | 1.19   | 0.002  | 2.33E-01 | 334529 |
| Lamb/mutton intake           | 0.011       | 0.007   | 0.015   | 0.002 | 5.64  | 0.010  | 1.67E-08 | 333335 | 0.001       | -0.003  | 0.004   | 0.002 | 0.36   | 0.001  | 7.16E-01 | 333226 | 0.001       | -0.002  | 0.005   | 0.002 | 0.77   | 0.001  | 4.40E-01 | 333842 |
| Pork intake                  | 0.005       | 0.001   | 0.009   | 0.002 | 2.51  | 0.004  | 1.21E-02 | 333277 | 0.002       | -0.002  | 0.005   | 0.002 | 1.02   | 0.002  | 3.08E-01 | 333170 | 0.000       | -0.004  | 0.004   | 0.002 | 0.04   | 0.000  | 9.69E-01 | 333787 |
| Cheese intake                | -0.011      | -0.017  | -0.005  | 0.003 | -3.47 | -0.006 | 5.20E-04 | 327491 | -0.003      | -0.008  | 0.002   | 0.003 | -1.11  | -0.002 | 2.67E-01 | 327380 | 0.000       | -0.006  | 0.005   | 0.003 | -0.16  | 0.000  | 8.69E-01 | 327987 |

**Table S11: Associations between SNP and lifestyle phenotypes.**

| Variable                                                                | rs2504706_C |         |         |       |       |        |          |        | rs4410790_C |         |         |       |       |        |          |        | rs2472297_T |         |         |       |       |        |          |        |
|-------------------------------------------------------------------------|-------------|---------|---------|-------|-------|--------|----------|--------|-------------|---------|---------|-------|-------|--------|----------|--------|-------------|---------|---------|-------|-------|--------|----------|--------|
|                                                                         | beta        | 95%CI_l | 95%CI_h | se    | t     | r      | p        | df.e   | beta        | 95%CI_l | 95%CI_h | se    | t     | r      | p        | df.e   | beta        | 95%CI_l | 95%CI_h | se    | t     | r      | p        | df.e   |
| Time spent watching television (TV)                                     | -0.012      | -0.021  | -0.003  | 0.005 | -2.65 | -0.005 | 8.03E-03 | 332902 | 0.012       | 0.004   | 0.020   | 0.004 | 3.02  | 0.005  | 2.54E-03 | 332793 | 0.003       | -0.005  | 0.012   | 0.004 | 0.78  | 0.001  | 4.32E-01 | 333404 |
| Usual walking pace                                                      | 0.004       | 0.001   | 0.008   | 0.002 | 2.43  | 0.004  | 1.51E-02 | 333424 | -0.001      | -0.003  | 0.002   | 0.002 | -0.33 | -0.001 | 7.41E-01 | 333312 | -0.002      | -0.005  | 0.001   | 0.002 | -1.17 | -0.002 | 2.43E-01 | 333933 |
| Summed MET minutes per week for all activity                            | -12.803     | -29.777 | 4.171   | 8.660 | -1.48 | -0.003 | 1.39E-01 | 271649 | 0.548       | -14.417 | 15.514  | 7.635 | 0.07  | 0.000  | 9.43E-01 | 271577 | -9.714      | #####   | 6.517   | 8.281 | -1.17 | -0.002 | 2.41E-01 | 272093 |
| MET minutes per week for moderate activity                              | -5.049      | -12.741 | 2.644   | 3.925 | -1.29 | -0.002 | 1.98E-01 | 271649 | -0.914      | -7.695  | 5.866   | 3.460 | -0.26 | -0.001 | 7.92E-01 | 271577 | -3.288      | #####   | 4.067   | 3.753 | -0.88 | -0.002 | 3.81E-01 | 272093 |
| MET minutes per week for vigorous activity                              | -0.026      | -7.492  | 7.440   | 3.809 | -0.01 | 0.000  | 9.95E-01 | 271649 | -1.891      | -8.475  | 4.694   | 3.360 | -0.56 | -0.001 | 5.74E-01 | 271577 | -4.525      | #####   | 2.616   | 3.643 | -1.24 | -0.002 | 2.14E-01 | 272093 |
| MET minutes per week for walking                                        | -7.728      | -14.566 | -0.890  | 3.489 | -2.22 | -0.004 | 2.68E-02 | 271649 | 3.353       | -2.675  | 9.381   | 3.076 | 1.09  | 0.002  | 2.76E-01 | 271577 | -1.901      | -8.438  | 4.636   | 3.335 | -0.57 | -0.001 | 5.69E-01 | 272093 |
| Sleep duration                                                          | 0.007       | 0.000   | 0.013   | 0.003 | 2.09  | 0.004  | 3.62E-02 | 333487 | -0.001      | -0.007  | 0.004   | 0.003 | -0.51 | -0.001 | 6.11E-01 | 333372 | 0.000       | -0.005  | 0.006   | 0.003 | 0.14  | 0.000  | 8.86E-01 | 333993 |
| Getting up in morning                                                   | -0.010      | -0.014  | -0.006  | 0.002 | -4.64 | -0.008 | 3.56E-06 | 334568 | -0.008      | -0.012  | -0.004  | 0.002 | -4.11 | -0.007 | 3.89E-05 | 334451 | -0.003      | -0.007  | 0.001   | 0.002 | -1.24 | -0.002 | 2.15E-01 | 335072 |
| Morning/evening person (chronotype)                                     | 0.012       | 0.007   | 0.018   | 0.003 | 4.39  | 0.008  | 1.12E-05 | 299433 | 0.001       | -0.003  | 0.006   | 0.002 | 0.59  | 0.001  | 5.55E-01 | 299344 | 0.002       | -0.004  | 0.007   | 0.003 | 0.56  | 0.001  | 5.76E-01 | 299893 |
| Nap during day                                                          | 0.003       | 0.000   | 0.006   | 0.002 | 1.73  | 0.003  | 8.33E-02 | 335137 | -0.003      | -0.006  | -0.001  | 0.001 | -2.31 | -0.004 | 2.10E-02 | 335022 | -0.005      | -0.008  | -0.002  | 0.002 | -3.23 | -0.006 | 1.22E-03 | 335644 |
| Sleeplessness / insomnia                                                | -0.001      | -0.005  | 0.003   | 0.002 | -0.64 | -0.001 | 5.19E-01 | 335030 | 0.001       | -0.003  | 0.004   | 0.002 | 0.43  | 0.001  | 6.65E-01 | 334913 | 0.001       | -0.003  | 0.005   | 0.002 | 0.42  | 0.001  | 6.72E-01 | 335536 |
| Daytime dozing / sleeping (narcolepsy)                                  | 0.001       | -0.002  | 0.003   | 0.001 | 0.36  | 0.001  | 7.22E-01 | 334152 | -0.004      | -0.007  | -0.002  | 0.001 | -3.60 | -0.006 | 3.17E-04 | 334034 | -0.006      | -0.008  | -0.003  | 0.001 | -4.28 | -0.007 | 1.91E-05 | 334656 |
| Ever smoked                                                             | 0.001       | -0.002  | 0.003   | 0.001 | 0.44  | 0.001  | 6.59E-01 | 334140 | -0.005      | -0.007  | -0.002  | 0.001 | -3.87 | -0.007 | 1.11E-04 | 334030 | -0.002      | -0.005  | 0.001   | 0.001 | -1.56 | -0.003 | 1.18E-01 | 334645 |
| Number of cigarettes currently smoked daily (current cigarette smokers) | -0.041      | -0.219  | 0.138   | 0.091 | -0.44 | -0.003 | 6.57E-01 | 23024  | 0.008       | -0.148  | 0.163   | 0.079 | 0.09  | 0.001  | 9.25E-01 | 23040  | 0.036       | -0.133  | 0.205   | 0.086 | 0.42  | 0.003  | 6.77E-01 | 23068  |
| Alcohol intake frequency                                                | -0.007      | -0.015  | 0.002   | 0.004 | -1.56 | -0.003 | 1.19E-01 | 335029 | 0.001       | -0.007  | 0.008   | 0.004 | 0.19  | 0.000  | 8.50E-01 | 334915 | 0.013       | 0.005   | 0.021   | 0.004 | 3.28  | 0.006  | 1.02E-03 | 335536 |
| Average intake of alcoholic units per week                              | -0.057      | -0.163  | 0.049   | 0.054 | -1.06 | -0.002 | 2.90E-01 | 331227 | 0.085       | -0.008  | 0.179   | 0.048 | 1.79  | 0.003  | 7.27E-02 | 331114 | 0.161       | 0.060   | 0.262   | 0.052 | 3.12  | 0.005  | 1.82E-03 | 331734 |

**Table S12: Associations between the cereal/coffee intake and lifestyle phenotypes.**

| Variable                                                                | Cereal intake |         |         |       |         |        |           |        | Coffee intake |         |         |       |        |        |           |        |
|-------------------------------------------------------------------------|---------------|---------|---------|-------|---------|--------|-----------|--------|---------------|---------|---------|-------|--------|--------|-----------|--------|
|                                                                         | beta          | 95%CI_l | 95%CI_h | se    | t       | r      | p         | df.e   | beta          | 95%CI_l | 95%CI_h | se    | t      | r      | p         | df.e   |
| Time spent watching television (TV)                                     | -0.034        | -0.036  | -0.032  | 0.001 | -33.21  | -0.057 | 2.11E-241 | 333481 | 0.003         | 0.001   | 0.006   | 0.001 | 2.35   | 0.004  | 1.89E-02  | 332848 |
| Usual walking pace                                                      | 0.015         | 0.014   | 0.015   | 0.000 | 38.53   | 0.067  | 0.00E+00  | 333879 | -0.003        | -0.004  | -0.002  | 0.001 | -6.24  | -0.011 | 4.30E-10  | 333261 |
| Summed MET minutes per week for all activity                            | 16.055        | 12.339  | 19.772  | 1.896 | 8.47    | 0.016  | 2.52E-17  | 272389 | -15.916       | -21.186 | -10.647 | 2.689 | -5.92  | -0.011 | 3.23E-09  | 271875 |
| MET minutes per week for moderate activity                              | 3.943         | 2.259   | 5.628   | 0.859 | 4.59    | 0.009  | 4.46E-06  | 272389 | -8.399        | -10.789 | -6.010  | 1.219 | -6.89  | -0.013 | 5.63E-12  | 271875 |
| MET minutes per week for vigorous activity                              | 13.333        | 11.700  | 14.966  | 0.833 | 16.00   | 0.031  | 1.36E-57  | 272389 | -5.675        | -7.991  | -3.359  | 1.182 | -4.80  | -0.009 | 1.56E-06  | 271875 |
| MET minutes per week for walking                                        | -1.221        | -2.718  | 0.277   | 0.764 | -1.60   | -0.003 | 1.10E-01  | 272389 | -1.842        | -3.967  | 0.282   | 1.084 | -1.70  | -0.003 | 8.92E-02  | 271875 |
| Sleep duration                                                          | 0.012         | 0.011   | 0.013   | 0.001 | 17.54   | 0.030  | 7.62E-69  | 334015 | -0.016        | -0.018  | -0.014  | 0.001 | -16.93 | -0.029 | 2.67E-64  | 333400 |
| Getting up in morning                                                   | 0.004         | 0.003   | 0.005   | 0.000 | 8.22    | 0.014  | 2.10E-16  | 335031 | 0.000         | -0.002  | 0.001   | 0.001 | -0.48  | -0.001 | 6.30E-01  | 334401 |
| Morning/evening person (chronotype)                                     | -0.013        | -0.015  | -0.012  | 0.001 | -21.70  | -0.040 | 2.57E-104 | 299974 | 0.015         | 0.014   | 0.017   | 0.001 | 17.59  | 0.032  | 3.05E-69  | 299387 |
| Nap during day                                                          | -0.001        | -0.002  | 0.000   | 0.000 | -3.30   | -0.006 | 9.75E-04  | 335581 | -0.001        | -0.002  | 0.000   | 0.001 | -1.66  | -0.003 | 9.62E-02  | 334951 |
| Sleeplessness / insomnia                                                | -0.007        | -0.008  | -0.006  | 0.000 | -15.23  | -0.026 | 2.24E-52  | 335475 | -0.003        | -0.004  | -0.001  | 0.001 | -3.96  | -0.007 | 7.47E-05  | 334845 |
| Daytime dozing / sleeping (narcolepsy)                                  | 0.002         | 0.001   | 0.002   | 0.000 | 5.93    | 0.010  | 3.05E-09  | 334626 | 0.000         | -0.001  | 0.001   | 0.000 | -0.70  | -0.001 | 4.86E-01  | 333999 |
| Ever smoked                                                             | -0.016        | -0.016  | -0.015  | 0.000 | -50.78  | -0.087 | 0.00E+00  | 334593 | 0.018         | 0.017   | 0.019   | 0.000 | 40.80  | 0.070  | 0.00E+00  | 333973 |
| Number of cigarettes currently smoked daily (current cigarette smokers) | -0.380        | -0.418  | -0.342  | 0.019 | -19.77  | -0.129 | 2.65E-86  | 23037  | 0.282         | 0.241   | 0.322   | 0.021 | 13.59  | 0.090  | 6.69E-42  | 22727  |
| Alcohol intake frequency                                                | -0.054        | -0.056  | -0.052  | 0.001 | -58.81  | -0.101 | 0.00E+00  | 335482 | 0.038         | 0.035   | 0.040   | 0.001 | 28.94  | 0.050  | 5.77E-184 | 334856 |
| Average intake of alcoholic units per week                              | -1.245        | -1.268  | -1.222  | 0.012 | -106.90 | -0.182 | 0.00E+00  | 331798 | 0.326         | 0.293   | 0.359   | 0.017 | 19.48  | 0.034  | 1.68E-84  | 331168 |

**Table S13: Significant mediation models of SNPs, lifestyle phenotypes, and the intake of cereal and coffee.**

|             |               |                           | Mediation model: X~Y~Z |         |         |       |         |           |        | Mediation model: X~Z~Y |         |         |       |         |           |        |
|-------------|---------------|---------------------------|------------------------|---------|---------|-------|---------|-----------|--------|------------------------|---------|---------|-------|---------|-----------|--------|
|             |               |                           | X~Z                    |         |         |       |         |           |        | X~Y                    |         |         |       |         |           |        |
| X           | Y             | Z                         | Beta                   | 95%CI_l | 95%CI_h | se    | T       | P         | R      | Beta                   | 95%CI_l | 95%CI_h | se    | T       | P         | R      |
| rs4410790_C | Cereal intake | Getting up in morning     | -0.008                 | -0.012  | -0.004  | 0.002 | -4.188  | 2.82E-05  | -0.007 | -0.038                 | -0.052  | -0.024  | 0.007 | -5.447  | 5.13E-08  | -0.009 |
| rs4410790_C | Cereal intake | Daytime dozing / sleeping | -0.004                 | -0.007  | -0.002  | 0.001 | -3.615  | 3.00E-04  | -0.006 | -0.038                 | -0.051  | -0.024  | 0.007 | -5.395  | 6.87E-08  | -0.009 |
| rs2472297_T | Cereal intake | Daytime dozing / sleeping | -0.006                 | -0.008  | -0.003  | 0.001 | -4.240  | 2.23E-05  | -0.007 | -0.059                 | -0.073  | -0.044  | 0.008 | -7.761  | 8.48E-15  | -0.013 |
| rs2472297_T | Cereal intake | Alcohol intake frequency  | 0.013                  | 0.005   | 0.021   | 0.004 | 3.243   | 1.18E-03  | 0.006  | -0.060                 | -0.074  | -0.045  | 0.008 | -7.891  | 3.01E-15  | -0.014 |
| rs2472297_T | Coffee intake | Alcohol intake frequency  | 0.014                  | 0.006   | 0.022   | 0.004 | 3.418   | 6.32E-04  | 0.006  | 0.142                  | 0.131   | 0.152   | 0.005 | 26.544  | 4.36E-155 | 0.046  |
|             |               |                           | X~Y                    |         |         |       |         |           |        | X~Z                    |         |         |       |         |           |        |
| X           | Y             | Z                         | Beta                   | 95%CI_l | 95%CI_h | se    | T       | P         | R      | Beta                   | 95%CI_l | 95%CI_h | se    | T       | P         | R      |
| rs4410790_C | Cereal intake | Getting up in morning     | -0.038                 | -0.052  | -0.024  | 0.007 | -5.447  | 5.13E-08  | -0.009 | -0.008                 | -0.012  | -0.004  | 0.002 | -4.188  | 2.82E-05  | -0.007 |
| rs4410790_C | Cereal intake | Daytime dozing / sleeping | -0.038                 | -0.051  | -0.024  | 0.007 | -5.395  | 6.87E-08  | -0.009 | -0.004                 | -0.007  | -0.002  | 0.001 | -3.615  | 3.00E-04  | -0.006 |
| rs2472297_T | Cereal intake | Daytime dozing / sleeping | -0.059                 | -0.073  | -0.044  | 0.008 | -7.761  | 8.48E-15  | -0.013 | -0.006                 | -0.008  | -0.003  | 0.001 | -4.240  | 2.23E-05  | -0.007 |
| rs2472297_T | Cereal intake | Alcohol intake frequency  | -0.060                 | -0.074  | -0.045  | 0.008 | -7.891  | 3.01E-15  | -0.014 | 0.013                  | 0.005   | 0.021   | 0.004 | 3.243   | 1.18E-03  | 0.006  |
| rs2472297_T | Coffee intake | Alcohol intake frequency  | 0.142                  | 0.131   | 0.152   | 0.005 | 26.544  | 4.36E-155 | 0.046  | 0.014                  | 0.006   | 0.022   | 0.004 | 3.418   | 6.32E-04  | 0.006  |
|             |               |                           | Y~Z/X                  |         |         |       |         |           |        | Z~Y/X                  |         |         |       |         |           |        |
| X           | Y             | Z                         | Beta                   | 95%CI_l | 95%CI_h | se    | T       | P         | R      | Beta                   | 95%CI_l | 95%CI_h | se    | T       | P         | R      |
| rs4410790_C | Cereal intake | Getting up in morning     | 0.004                  | 0.003   | 0.005   | 0.000 | 7.588   | 3.25E-14  | 0.013  | 0.048                  | 0.036   | 0.060   | 0.006 | 7.588   | 3.25E-14  | 0.013  |
| rs4410790_C | Cereal intake | Daytime dozing / sleeping | 0.002                  | 0.001   | 0.003   | 0.000 | 6.288   | 3.23E-10  | 0.011  | 0.061                  | 0.042   | 0.080   | 0.010 | 6.288   | 3.23E-10  | 0.011  |
| rs2472297_T | Cereal intake | Daytime dozing / sleeping | 0.002                  | 0.001   | 0.003   | 0.000 | 6.241   | 4.36E-10  | 0.011  | 0.060                  | 0.041   | 0.079   | 0.010 | 6.241   | 4.36E-10  | 0.011  |
| rs2472297_T | Cereal intake | Alcohol intake frequency  | -0.054                 | -0.056  | -0.052  | 0.001 | -59.152 | 0.00E+00  | -0.102 | -0.191                 | -0.197  | -0.185  | 0.003 | -59.152 | 0.00E+00  | -0.102 |
| rs2472297_T | Coffee intake | Alcohol intake frequency  | 0.037                  | 0.034   | 0.040   | 0.001 | 28.421  | 1.79E-177 | 0.049  | 0.065                  | 0.061   | 0.070   | 0.002 | 28.421  | 1.79E-177 | 0.049  |
|             |               |                           | X~Z/Y                  |         |         |       |         |           |        | X~Y/Z                  |         |         |       |         |           |        |
| X           | Y             | Z                         | Beta                   | 95%CI_l | 95%CI_h | se    | T       | P         | R      | Beta                   | 95%CI_l | 95%CI_h | se    | T       | P         | R      |
| rs4410790_C | Cereal intake | Getting up in morning     | -0.008                 | -0.012  | -0.004  | 0.002 | -4.116  | 3.85E-05  | -0.007 | -0.038                 | -0.051  | -0.024  | 0.007 | -5.392  | 6.96E-08  | -0.009 |
| rs4410790_C | Cereal intake | Daytime dozing / sleeping | -0.004                 | -0.007  | -0.002  | 0.001 | -3.556  | 3.76E-04  | -0.006 | -0.037                 | -0.051  | -0.024  | 0.007 | -5.355  | 8.54E-08  | -0.009 |
| rs2472297_T | Cereal intake | Daytime dozing / sleeping | -0.006                 | -0.008  | -0.003  | 0.001 | -4.156  | 3.24E-05  | -0.007 | -0.058                 | -0.073  | -0.043  | 0.008 | -7.715  | 1.21E-14  | -0.013 |
| rs2472297_T | Cereal intake | Alcohol intake frequency  | 0.010                  | 0.002   | 0.018   | 0.004 | 2.453   | 1.42E-02  | 0.004  | -0.057                 | -0.072  | -0.042  | 0.008 | -7.600  | 2.97E-14  | -0.013 |
| rs2472297_T | Coffee intake | Alcohol intake frequency  | 0.009                  | 0.001   | 0.016   | 0.004 | 2.114   | 3.45E-02  | 0.004  | 0.141                  | 0.131   | 0.151   | 0.005 | 26.408  | 1.61E-153 | 0.046  |

**Model selection**

|             |               |                           | X~Y~Z            |                   |                              | X~Z~Y            |                   |                              |                               |                      |
|-------------|---------------|---------------------------|------------------|-------------------|------------------------------|------------------|-------------------|------------------------------|-------------------------------|----------------------|
| X           | Y             | Z                         | Bootsrap P value | Theoretic P value | Proportion of Mediation (PM) | Bootsrap P value | Theoretic P value | Proportion of Mediation (PM) | Excess PM of X~Y~Z than X~Z~Y | P value of Excess PM |
| rs4410790_C | Cereal intake | Getting up in morning     | 0                | 1.55E-05          | 1.71%                        | 0                | 2.28E-04          | 1.01%                        | 0.70%                         | 0.38                 |
| rs4410790_C | Cereal intake | Daytime dozing / sleeping | 0                | 1.07E-04          | 1.63%                        | 0                | 1.89E-03          | 0.73%                        | 0.90%                         | 0.214                |
| rs2472297_T | Cereal intake | Daytime dozing / sleeping | 0                | 2.82E-06          | 1.98%                        | 0                | 4.55E-04          | 0.59%                        | 1.39%                         | 0.018                |
| rs2472297_T | Cereal intake | Alcohol intake frequency  | 0                | 5.47E-15          | 24.75%                       | 0                | 1.54E-03          | 4.18%                        | 20.57%                        | 0.002                |
| rs2472297_T | Coffee intake | Alcohol intake frequency  | 0                | 1.37E-82          | 38.14%                       | 0                | 8.85E-04          | 0.63%                        | 37.51%                        | 0                    |

**Table S14: Associations between SNPs and body/blood fat levels.**

| Variable              | rs2504706_C |         |         |       |       |        |          |        | rs4410790_C |         |         |       |       |        |          |        | rs2472297_T |         |         |       |       |        |          |        |
|-----------------------|-------------|---------|---------|-------|-------|--------|----------|--------|-------------|---------|---------|-------|-------|--------|----------|--------|-------------|---------|---------|-------|-------|--------|----------|--------|
|                       | beta        | 95%CI_l | 95%CI_h | se    | t     | r      | p        | df.e   | beta        | 95%CI_l | 95%CI_h | se    | t     | r      | p        | df.e   | beta        | 95%CI_l | 95%CI_h | se    | t     | r      | p        | df.e   |
| Body mass index (BMI) | -0.080      | -0.107  | -0.053  | 0.014 | -5.88 | -0.010 | 4.21E-09 | 334176 | 0.046       | 0.022   | 0.070   | 0.012 | 3.83  | 0.007  | 1.30E-04 | 334063 | 0.070       | 0.044   | 0.095   | 0.013 | 5.34  | 0.009  | 9.43E-08 | 334680 |
| Cholesterol           | -0.004      | -0.011  | 0.002   | 0.003 | -1.22 | -0.002 | 2.21E-01 | 319620 | 0.005       | -0.001  | 0.011   | 0.003 | 1.64  | 0.003  | 1.02E-01 | 319519 | 0.014       | 0.008   | 0.020   | 0.003 | 4.38  | 0.008  | 1.19E-05 | 320107 |
| HDL cholesterol       | -0.001      | -0.003  | 0.001   | 0.001 | -1.08 | -0.002 | 2.81E-01 | 292598 | -0.005      | -0.007  | -0.003  | 0.001 | -4.93 | -0.009 | 8.07E-07 | 292504 | 0.003       | 0.001   | 0.005   | 0.001 | 2.64  | 0.005  | 8.32E-03 | 293041 |
| LDL direct            | -0.001      | -0.006  | 0.004   | 0.003 | -0.47 | -0.001 | 6.38E-01 | 319014 | 0.005       | 0.000   | 0.009   | 0.002 | 2.15  | 0.004  | 3.17E-02 | 318915 | 0.010       | 0.006   | 0.015   | 0.002 | 4.23  | 0.007  | 2.39E-05 | 319502 |
| Triglycerides         | -0.002      | -0.008  | 0.003   | 0.003 | -0.78 | -0.001 | 4.36E-01 | 319357 | 0.015       | 0.010   | 0.021   | 0.003 | 5.94  | 0.011  | 2.84E-09 | 319256 | -0.005      | -0.011  | 0.000   | 0.003 | -1.88 | -0.003 | 5.98E-02 | 319843 |

**Table S15: Associations between the cereal/coffee intake and body/blood fat levels.**

| Variable              | Cereal intake |         |         |       |        |        |           |        | Coffee intake |         |         |       |       |        |           |        |
|-----------------------|---------------|---------|---------|-------|--------|--------|-----------|--------|---------------|---------|---------|-------|-------|--------|-----------|--------|
|                       | beta          | 95%CI_l | 95%CI_h | se    | t      | r      | p         | df.e   | beta          | 95%CI_l | 95%CI_h | se    | t     | r      | p         | df.e   |
| Body mass index (BMI) | -0.131        | -0.137  | -0.125  | 0.003 | -43.92 | -0.076 | 0.00E+00  | 334613 | 0.129         | 0.121   | 0.138   | 0.004 | 30.66 | 0.053  | 3.84E-206 | 333987 |
| Cholesterol           | -0.027        | -0.029  | -0.026  | 0.001 | -37.66 | -0.066 | 9.99E-310 | 320045 | 0.026         | 0.024   | 0.028   | 0.001 | 25.15 | 0.044  | 1.89E-139 | 319454 |
| HDL cholesterol       | -0.007        | -0.007  | -0.006  | 0.000 | -29.61 | -0.055 | 2.15E-192 | 292978 | -0.001        | -0.002  | -0.001  | 0.000 | -3.49 | -0.006 | 4.81E-04  | 292451 |
| LDL direct            | -0.015        | -0.016  | -0.014  | 0.001 | -27.10 | -0.048 | 1.57E-161 | 319441 | 0.022         | 0.020   | 0.023   | 0.001 | 27.37 | 0.048  | 9.02E-165 | 318853 |
| Triglycerides         | -0.010        | -0.011  | -0.009  | 0.001 | -15.67 | -0.028 | 2.60E-55  | 319782 | 0.004         | 0.003   | 0.006   | 0.001 | 4.83  | 0.009  | 1.39E-06  | 319191 |

**Table S16: Significant mediation models of SNPs, body/blood fat levels and the intake of cereal and coffee.**

|             |               |                       | Mediation model: X~Y~Z |         |         |       |         |           |        | Mediation model: X~Z~Y |         |         |       |         |           |        |
|-------------|---------------|-----------------------|------------------------|---------|---------|-------|---------|-----------|--------|------------------------|---------|---------|-------|---------|-----------|--------|
|             |               |                       | X~Z                    |         |         |       |         |           |        | X~Y                    |         |         |       |         |           |        |
| X           | Y             | Z                     | Beta                   | 95%CI_l | 95%CI_h | se    | T       | P         | R      | Beta                   | 95%CI_l | 95%CI_h | se    | T       | P         | R      |
| rs2504706_C | Cereal intake | Body mass index (BMI) | -0.080                 | -0.107  | -0.054  | 0.014 | -5.890  | 3.86E-09  | -0.010 | 0.058                  | 0.042   | 0.073   | 0.008 | 7.304   | 2.81E-13  | 0.013  |
| rs4410790_C | Cereal intake | Body mass index (BMI) | 0.047                  | 0.023   | 0.070   | 0.012 | 3.896   | 9.77E-05  | 0.007  | -0.038                 | -0.052  | -0.025  | 0.007 | -5.529  | 3.23E-08  | -0.010 |
| rs2472297_T | Cereal intake | Body mass index (BMI) | 0.069                  | 0.044   | 0.095   | 0.013 | 5.317   | 1.06E-07  | 0.009  | -0.059                 | -0.074  | -0.045  | 0.008 | -7.871  | 3.52E-15  | -0.014 |
| rs2504706_C | Coffee intake | Body mass index (BMI) | -0.081                 | -0.108  | -0.054  | 0.014 | -5.930  | 3.03E-09  | -0.010 | -0.033                 | -0.044  | -0.022  | 0.006 | -5.885  | 3.99E-09  | -0.010 |
| rs4410790_C | Coffee intake | Body mass index (BMI) | 0.045                  | 0.021   | 0.068   | 0.012 | 3.721   | 1.98E-04  | 0.006  | 0.120                  | 0.110   | 0.130   | 0.005 | 24.338  | 1.00E-130 | 0.042  |
| rs2472297_T | Coffee intake | Body mass index (BMI) | 0.067                  | 0.042   | 0.093   | 0.013 | 5.161   | 2.46E-07  | 0.009  | 0.142                  | 0.132   | 0.153   | 0.005 | 26.577  | 1.83E-155 | 0.046  |
| rs2472297_T | Cereal intake | Cholesterol           | 0.014                  | 0.008   | 0.020   | 0.003 | 4.444   | 8.85E-06  | 0.008  | -0.059                 | -0.074  | -0.044  | 0.008 | -7.602  | 2.93E-14  | -0.013 |
| rs2472297_T | Coffee intake | Cholesterol           | 0.014                  | 0.008   | 0.020   | 0.003 | 4.481   | 7.44E-06  | 0.008  | 0.142                  | 0.131   | 0.152   | 0.005 | 25.863  | 2.50E-147 | 0.046  |
| rs4410790_C | Coffee intake | HDL cholesterol       | -0.005                 | -0.006  | -0.003  | 0.001 | -4.851  | 1.23E-06  | -0.009 | 0.120                  | 0.110   | 0.130   | 0.005 | 22.754  | 1.67E-114 | 0.042  |
| rs2472297_T | Cereal intake | LDL direct            | 0.011                  | 0.006   | 0.015   | 0.002 | 4.293   | 1.77E-05  | 0.008  | -0.059                 | -0.074  | -0.044  | 0.008 | -7.610  | 2.75E-14  | -0.013 |
| rs2472297_T | Coffee intake | LDL direct            | 0.010                  | 0.006   | 0.015   | 0.002 | 4.262   | 2.02E-05  | 0.008  | 0.142                  | 0.131   | 0.153   | 0.005 | 25.864  | 2.44E-147 | 0.046  |
| rs4410790_C | Cereal intake | Triglycerides         | 0.015                  | 0.010   | 0.021   | 0.003 | 5.929   | 3.05E-09  | 0.011  | -0.037                 | -0.051  | -0.023  | 0.007 | -5.193  | 2.07E-07  | -0.009 |
| rs4410790_C | Coffee intake | Triglycerides         | 0.015                  | 0.010   | 0.020   | 0.003 | 5.807   | 6.36E-09  | 0.010  | 0.119                  | 0.109   | 0.129   | 0.005 | 23.596  | 5.39E-123 | 0.042  |
|             |               |                       | X~Y                    |         |         |       |         |           |        | X~Z                    |         |         |       |         |           |        |
| X           | Y             | Z                     | Beta                   | 95%CI_l | 95%CI_h | se    | T       | P         | R      | Beta                   | 95%CI_l | 95%CI_h | se    | T       | P         | R      |
| rs2504706_C | Cereal intake | Body mass index (BMI) | 0.058                  | 0.042   | 0.073   | 0.008 | 7.304   | 2.81E-13  | 0.013  | -0.080                 | -0.107  | -0.054  | 0.014 | -5.890  | 3.86E-09  | -0.010 |
| rs4410790_C | Cereal intake | Body mass index (BMI) | -0.038                 | -0.052  | -0.025  | 0.007 | -5.529  | 3.23E-08  | -0.010 | 0.047                  | 0.023   | 0.070   | 0.012 | 3.896   | 9.77E-05  | 0.007  |
| rs2472297_T | Cereal intake | Body mass index (BMI) | -0.059                 | -0.074  | -0.045  | 0.008 | -7.871  | 3.52E-15  | -0.014 | 0.069                  | 0.044   | 0.095   | 0.013 | 5.317   | 1.06E-07  | 0.009  |
| rs2504706_C | Coffee intake | Body mass index (BMI) | -0.033                 | -0.044  | -0.022  | 0.006 | -5.885  | 3.99E-09  | -0.010 | -0.081                 | -0.108  | -0.054  | 0.014 | -5.930  | 3.03E-09  | -0.010 |
| rs4410790_C | Coffee intake | Body mass index (BMI) | 0.120                  | 0.110   | 0.130   | 0.005 | 24.338  | 1.00E-130 | 0.042  | 0.045                  | 0.021   | 0.068   | 0.012 | 3.721   | 1.98E-04  | 0.006  |
| rs2472297_T | Coffee intake | Body mass index (BMI) | 0.142                  | 0.132   | 0.153   | 0.005 | 26.577  | 1.83E-155 | 0.046  | 0.067                  | 0.042   | 0.093   | 0.013 | 5.161   | 2.46E-07  | 0.009  |
| rs2472297_T | Cereal intake | Cholesterol           | -0.059                 | -0.074  | -0.044  | 0.008 | -7.602  | 2.93E-14  | -0.013 | 0.014                  | 0.008   | 0.020   | 0.003 | 4.444   | 8.85E-06  | 0.008  |
| rs2472297_T | Coffee intake | Cholesterol           | 0.142                  | 0.131   | 0.152   | 0.005 | 25.863  | 2.50E-147 | 0.046  | 0.014                  | 0.008   | 0.020   | 0.003 | 4.481   | 7.44E-06  | 0.008  |
| rs4410790_C | Coffee intake | HDL cholesterol       | 0.120                  | 0.110   | 0.130   | 0.005 | 22.754  | 1.67E-114 | 0.042  | -0.005                 | -0.006  | -0.003  | 0.001 | -4.851  | 1.23E-06  | -0.009 |
| rs2472297_T | Cereal intake | LDL direct            | -0.059                 | -0.074  | -0.044  | 0.008 | -7.610  | 2.75E-14  | -0.013 | 0.011                  | 0.006   | 0.015   | 0.002 | 4.293   | 1.77E-05  | 0.008  |
| rs2472297_T | Coffee intake | LDL direct            | 0.142                  | 0.131   | 0.153   | 0.005 | 25.864  | 2.44E-147 | 0.046  | 0.010                  | 0.006   | 0.015   | 0.002 | 4.262   | 2.02E-05  | 0.008  |
| rs4410790_C | Cereal intake | Triglycerides         | -0.037                 | -0.051  | -0.023  | 0.007 | -5.193  | 2.07E-07  | -0.009 | 0.015                  | 0.010   | 0.021   | 0.003 | 5.929   | 3.05E-09  | 0.011  |
| rs4410790_C | Coffee intake | Triglycerides         | 0.119                  | 0.109   | 0.129   | 0.005 | 23.596  | 5.39E-123 | 0.042  | 0.015                  | 0.010   | 0.020   | 0.003 | 5.807   | 6.36E-09  | 0.010  |
|             |               |                       | Y~Z/X                  |         |         |       |         |           |        | Z~Y/X                  |         |         |       |         |           |        |
| X           | Y             | Z                     | Beta                   | 95%CI_l | 95%CI_h | se    | T       | P         | R      | Beta                   | 95%CI_l | 95%CI_h | se    | T       | P         | R      |
| rs2504706_C | Cereal intake | Body mass index (BMI) | -0.128                 | -0.134  | -0.122  | 0.003 | -42.887 | 0.00E+00  | -0.074 | -0.043                 | -0.045  | -0.041  | 0.001 | -42.887 | 0.00E+00  | -0.074 |
| rs4410790_C | Cereal intake | Body mass index (BMI) | -0.128                 | -0.134  | -0.122  | 0.003 | -42.964 | 0.00E+00  | -0.074 | -0.043                 | -0.045  | -0.041  | 0.001 | -42.964 | 0.00E+00  | -0.074 |
| rs2472297_T | Cereal intake | Body mass index (BMI) | -0.128                 | -0.134  | -0.122  | 0.003 | -42.934 | 0.00E+00  | -0.074 | -0.043                 | -0.045  | -0.041  | 0.001 | -42.934 | 0.00E+00  | -0.074 |
| rs2504706_C | Coffee intake | Body mass index (BMI) | 0.132                  | 0.124   | 0.140   | 0.004 | 31.268  | 2.64E-214 | 0.054  | 0.022                  | 0.021   | 0.024   | 0.001 | 31.268  | 2.64E-214 | 0.054  |
| rs4410790_C | Coffee intake | Body mass index (BMI) | 0.132                  | 0.123   | 0.140   | 0.004 | 31.181  | 3.96E-213 | 0.054  | 0.022                  | 0.021   | 0.024   | 0.001 | 31.181  | 3.96E-213 | 0.054  |
| rs2472297_T | Coffee intake | Body mass index (BMI) | 0.131                  | 0.123   | 0.140   | 0.004 | 31.105  | 4.15E-212 | 0.054  | 0.022                  | 0.021   | 0.023   | 0.001 | 31.105  | 4.15E-212 | 0.054  |
| rs2472297_T | Cereal intake | Cholesterol           | -0.028                 | -0.029  | -0.026  | 0.001 | -37.942 | 2.63E-314 | -0.067 | -0.163                 | -0.171  | -0.155  | 0.004 | -37.942 | 2.63E-314 | -0.067 |
| rs2472297_T | Coffee intake | Cholesterol           | 0.025                  | 0.023   | 0.027   | 0.001 | 24.610  | 1.32E-133 | 0.044  | 0.075                  | 0.069   | 0.081   | 0.003 | 24.610  | 1.32E-133 | 0.044  |
| rs4410790_C | Coffee intake | HDL cholesterol       | -0.001                 | -0.002  | -0.001  | 0.000 | -3.550  | 3.85E-04  | -0.007 | -0.037                 | -0.057  | -0.016  | 0.010 | -3.550  | 3.85E-04  | -0.007 |

| X           | Y             | Z             | X~Z/Y  |         |         |       |         |           |        | X~Y/Z  |         |         |       |         |           |        |
|-------------|---------------|---------------|--------|---------|---------|-------|---------|-----------|--------|--------|---------|---------|-------|---------|-----------|--------|
|             |               |               | Beta   | 95%CI_l | 95%CI_h | se    | T       | P         | R      | Beta   | 95%CI_l | 95%CI_h | se    | T       | P         | R      |
| rs2472297_T | Cereal intake | LDL direct    | -0.015 | -0.016  | -0.014  | 0.001 | -27.281 | 1.10E-163 | -0.048 | -0.152 | -0.163  | -0.141  | 0.006 | -27.281 | 1.10E-163 | -0.048 |
| rs2472297_T | Coffee intake | LDL direct    | 0.021  | 0.020   | 0.023   | 0.001 | 26.912  | 2.43E-159 | 0.048  | 0.107  | 0.099   | 0.114   | 0.004 | 26.912  | 2.43E-159 | 0.048  |
| rs4410790_C | Cereal intake | Triglycerides | -0.010 | -0.011  | -0.009  | 0.001 | -15.700 | 1.60E-55  | -0.028 | -0.076 | -0.086  | -0.067  | 0.005 | -15.700 | 1.60E-55  | -0.028 |
| rs4410790_C | Coffee intake | Triglycerides | 0.004  | 0.002   | 0.006   | 0.001 | 4.583   | 4.58E-06  | 0.008  | 0.016  | 0.009   | 0.023   | 0.003 | 4.583   | 4.58E-06  | 0.008  |

**Model selection**

| X           | Y             | Z                     | X~Y~Z            |                   |                              | X~Z~Y            |                   |                              | Excess PM of X~Y~Z than X~Z~Y | P value of Excess PM |
|-------------|---------------|-----------------------|------------------|-------------------|------------------------------|------------------|-------------------|------------------------------|-------------------------------|----------------------|
|             |               |                       | Bootsrap P value | Theoretic P value | Proportion of Mediation (PM) | Bootsrap P value | Theoretic P value | Proportion of Mediation (PM) |                               |                      |
| rs2504706_C | Cereal intake | Body mass index (BMI) | 0                | 1.68E-12          | 9.19%                        | 0                | 4.64E-09          | 5.97%                        | 3.21%                         | 0.3                  |
| rs4410790_C | Cereal intake | Body mass index (BMI) | 0                | 8.95E-08          | 10.53%                       | 0                | 8.61E-05          | 5.23%                        | 5.30%                         | 0.234                |
| rs2472297_T | Cereal intake | Body mass index (BMI) | 0                | 1.60E-14          | 10.97%                       | 0                | 2.39E-07          | 5.00%                        | 5.97%                         | 0.07                 |
| rs2504706_C | Coffee intake | Body mass index (BMI) | 0                | 2.66E-09          | 5.37%                        | 0                | 6.45E-09          | 5.45%                        | -0.08%                        | 0.996                |
| rs4410790_C | Coffee intake | Body mass index (BMI) | 0                | 1.41E-81          | 35.31%                       | 0                | 1.74E-04          | 0.83%                        | 34.48%                        | 0                    |
| rs2472297_T | Coffee intake | Body mass index (BMI) | 0                | 6.72E-83          | 27.71%                       | 0                | 6.47E-07          | 1.04%                        | 26.66%                        | 0                    |
| rs2472297_T | Cereal intake | Cholesterol           | 0                | 6.51E-14          | 11.46%                       | 0                | 1.17E-05          | 3.92%                        | 7.54%                         | 0.024                |
| rs2472297_T | Coffee intake | Cholesterol           | 0                | 6.82E-68          | 25.14%                       | 0                | 1.43E-05          | 0.75%                        | 24.38%                        | 0                    |
| rs4410790_C | Coffee intake | HDL cholesterol       | 0                | 2.28E-04          | 3.09%                        | 0                | 4.61E-03          | 0.14%                        | 2.95%                         | 0                    |
| rs2472297_T | Cereal intake | LDL direct            | 0                | 1.80E-13          | 8.56%                        | 0                | 3.04E-05          | 2.72%                        | 5.83%                         | 0.012                |
| rs2472297_T | Coffee intake | LDL direct            | 0                | 4.65E-75          | 28.92%                       | 0                | 4.11E-05          | 0.79%                        | 28.13%                        | 0                    |
| rs4410790_C | Cereal intake | Triglycerides         | 0                | 1.33E-06          | 2.44%                        | 0                | 3.79E-08          | 3.18%                        | -0.74%                        | 0.588                |
| rs4410790_C | Coffee intake | Triglycerides         | 0                | 1.04E-05          | 3.30%                        | 0                | 4.52E-04          | 0.20%                        | 3.10%                         | 0                    |



**Table S17: Associations between the GMV-association patterns of cognitive functions and the GMV-association patterns of the intake of cereal and coffee (follow-up).**

| Variable                  | Cereal intake |          | Coffee intake |          |
|---------------------------|---------------|----------|---------------|----------|
|                           | R             | P_perm   | R             | P_perm   |
| Fluid intelligence        | 0.6292        | 2.00E-04 | -0.4230       | 1.52E-02 |
| Numeric memory            | 0.6566        | 0.00E+00 | -0.4553       | 8.20E-03 |
| Prospective memory        | 0.4812        | 4.80E-03 | -0.4259       | 1.36E-02 |
| Reaction time             | -0.4430       | 9.80E-03 | 0.3069        | 8.47E-02 |
| Pairs matching            | -0.4396       | 8.40E-03 | 0.5763        | 2.00E-04 |
| Matrix pattern completion | 0.7104        | 0.00E+00 | -0.6213       | 1.00E-04 |
| Symbol digit substitution | 0.6875        | 0.00E+00 | -0.6187       | 0.00E+00 |
| Tower rearranging         | 0.4178        | 1.66E-02 | -0.3914       | 2.71E-02 |
| Numeric trail making      | 0.6251        | 0.00E+00 | -0.6043       | 0.00E+00 |
| Alphanumeric trail making | 0.6873        | 0.00E+00 | -0.7018       | 0.00E+00 |

**Table S18: Associations between the GMV-association patterns of cognitive functions and the GMV-association patterns of the intake of cereal and coffee (baseline).**

| Variable                  | Cereal intake |          | Coffee intake |          |
|---------------------------|---------------|----------|---------------|----------|
|                           | R             | P_perm   | R             | P_perm   |
| Fluid intelligence        | 0.6177        | 0.00E+00 | -0.4353       | 1.24E-02 |
| Numeric memory            | 0.0717        | 6.91E-01 | 0.1005        | 5.79E-01 |
| Prospective memory        | 0.4122        | 2.00E-02 | -0.3661       | 3.50E-02 |
| Reaction time             | -0.3931       | 2.06E-02 | 0.2239        | 2.14E-01 |
| Pairs matching            | -0.4448       | 9.30E-03 | 0.3957        | 2.13E-02 |
| Matrix pattern completion | 0.7693        | 0.00E+00 | -0.6601       | 0.00E+00 |
| Symbol digit substitution | 0.7832        | 0.00E+00 | -0.6864       | 0.00E+00 |
| Tower rearranging         | 0.4482        | 8.10E-03 | -0.4022       | 2.21E-02 |
| Numeric trail making      | 0.6506        | 0.00E+00 | -0.5945       | 2.00E-04 |
| Alphanumeric trail making | 0.7320        | 0.00E+00 | -0.6902       | 1.00E-04 |

**Table S19: Associations between the GMV-association patterns of the cereal/coffee intake and the gene-expression patterns of eQTL genes.**

| Gene information |          |     |          |          |            | Cereal intake |        |        | Coffee intake |        |        |
|------------------|----------|-----|----------|----------|------------|---------------|--------|--------|---------------|--------|--------|
| ensg             | symbol   | chr | start    | end      | IndSigSNPs | R             | P_perm | FDR    | R             | P_perm | FDR    |
| ENSG00000170915  | PAQR8    | 6   | 52226219 | 52272575 | rs2504706  | -0.1236       | 0.5728 | 0.7731 | 0.0121        | 0.9553 | 0.9818 |
| ENSG00000106546  | AHR      | 7   | 17338246 | 17385776 | rs4410790  | 0.2110        | 0.4152 | 0.7107 | -0.5764       | 0.0030 | 0.0333 |
| ENSG00000048052  | HDAC9    | 7   | 18126572 | 19042039 | rs4410790  | 0.3952        | 0.0703 | 0.2724 | -0.5828       | 0.0016 | 0.0333 |
| ENSG00000071189  | SNX13    | 7   | 17830385 | 17980124 | rs4410790  | -0.0009       | 0.9953 | 0.9953 | -0.1543       | 0.2854 | 0.6452 |
| ENSG00000171243  | SOSTDC1  | 7   | 16501106 | 16570205 | rs4410790  | 0.1868        | 0.4992 | 0.7255 | -0.4163       | 0.0946 | 0.3087 |
| ENSG00000106537  | TSPAN13  | 7   | 16793160 | 16824161 | rs4410790  | 0.2506        | 0.3784 | 0.7107 | -0.6340       | 0.0043 | 0.0333 |
| ENSG00000103653  | CSK      | 15  | 75074398 | 75095539 | rs2472297  | -0.1701       | 0.4239 | 0.7107 | 0.5100        | 0.0020 | 0.0333 |
| ENSG00000129009  | ISLR     | 15  | 74466012 | 74469213 | rs2472297  | 0.1493        | 0.5736 | 0.7731 | -0.4290       | 0.0655 | 0.2707 |
| ENSG00000129038  | LOXL1    | 15  | 74218330 | 74244478 | rs2472297  | 0.1000        | 0.6380 | 0.8070 | -0.2116       | 0.2914 | 0.6452 |
| ENSG00000140400  | MAN2C1   | 15  | 75648133 | 75660971 | rs2472297  | -0.0210       | 0.9234 | 0.9818 | 0.1608        | 0.4241 | 0.7107 |
| ENSG00000178802  | MPI      | 15  | 75182346 | 75191798 | rs2472297  | 0.2229        | 0.2847 | 0.6452 | -0.4723       | 0.0035 | 0.0333 |
| ENSG00000140464  | PML      | 15  | 74287014 | 74340153 | rs2472297  | 0.2057        | 0.2529 | 0.6272 | -0.4198       | 0.0043 | 0.0333 |
| ENSG00000169410  | PTPN9    | 15  | 75759462 | 75871630 | rs2472297  | 0.1916        | 0.4476 | 0.7116 | -0.3645       | 0.1209 | 0.3569 |
| ENSG00000138623  | SEMA7A   | 15  | 74701630 | 74726808 | rs2472297  | -0.1685       | 0.3427 | 0.7107 | -0.0681       | 0.7029 | 0.8070 |
| ENSG00000067221  | STOML1   | 15  | 74275547 | 74286963 | rs2472297  | 0.3875        | 0.1639 | 0.4619 | -0.6437       | 0.0033 | 0.0333 |
| ENSG00000140497  | SCAMP2   | 15  | 75136071 | 75165706 | rs2472297  | -0.0420       | 0.7987 | 0.8843 | -0.1404       | 0.3915 | 0.7107 |
| ENSG00000169371  | SNUPN    | 15  | 75890424 | 75918810 | rs2472297  | 0.3137        | 0.2141 | 0.5531 | -0.4634       | 0.0420 | 0.1864 |
| ENSG00000169375  | SIN3A    | 15  | 75661720 | 75748183 | rs2472297  | -0.1270       | 0.5032 | 0.7255 | 0.4013        | 0.0164 | 0.0924 |
| ENSG00000140365  | COMMD4   | 15  | 75628232 | 75634268 | rs2472297  | 0.1329        | 0.3881 | 0.7107 | -0.3447       | 0.0074 | 0.0459 |
| ENSG00000177971  | IMP3     | 15  | 75931426 | 75941047 | rs2472297  | 0.1356        | 0.5161 | 0.7272 | -0.2717       | 0.1733 | 0.4672 |
| ENSG00000167173  | C15orf39 | 15  | 75487984 | 75504510 | rs2472297  | 0.0865        | 0.6984 | 0.8070 | -0.1532       | 0.4910 | 0.7255 |
| ENSG00000178761  | FAM219B  | 15  | 75192328 | 75199462 | rs2472297  | -0.0090       | 0.9660 | 0.9818 | -0.0842       | 0.6825 | 0.8070 |
| ENSG00000167178  | ISLR2    | 15  | 74392652 | 74430881 | rs2472297  | 0.2473        | 0.3861 | 0.7107 | -0.4618       | 0.0782 | 0.2852 |
| ENSG00000138621  | PPCDC    | 15  | 75315896 | 75409803 | rs2472297  | -0.1075       | 0.5919 | 0.7808 | 0.0802        | 0.6957 | 0.8070 |
| ENSG00000140398  | NEIL1    | 15  | 75639296 | 75647592 | rs2472297  | -0.1162       | 0.6314 | 0.8070 | 0.1878        | 0.4364 | 0.7116 |
| ENSG00000140506  | LMAN1L   | 15  | 75105057 | 75118099 | rs2472297  | -0.0849       | 0.6943 | 0.8070 | 0.3244        | 0.0937 | 0.3087 |
| ENSG00000179151  | EDC3     | 15  | 74922899 | 74988633 | rs2472297  | 0.0631        | 0.7842 | 0.8840 | 0.0137        | 0.9533 | 0.9818 |
| ENSG00000138629  | UBL7     | 15  | 74738318 | 74753523 | rs2472297  | 0.1920        | 0.4862 | 0.7255 | -0.5072       | 0.0294 | 0.1519 |
| ENSG00000182950  | ODF3L1   | 15  | 76016318 | 76020029 | rs2472297  | -0.0162       | 0.9413 | 0.9818 | 0.3239        | 0.1104 | 0.3422 |
| ENSG00000198794  | SCAMP5   | 15  | 75249560 | 75313837 | rs2472297  | 0.2328        | 0.3772 | 0.7107 | -0.4699       | 0.0421 | 0.1864 |
| ENSG00000213578  | CPLX3    | 15  | 75118888 | 75124141 | rs2472297  | 0.4721        | 0.0029 | 0.0333 | -0.4429       | 0.0072 | 0.0459 |

**Table S20: Association between the GMV-association patterns of the cognitive functions and the gene-expression patterns of eQTL genes.**

| Gene symbol               | CPLX3        |        |             |
|---------------------------|--------------|--------|-------------|
|                           | R            | P_perm | FDR         |
| Fluid intelligence        | 0.42267375   | 0.0098 | 0.016333333 |
| Numeric memory            | 0.490723015  | 0.0013 | 0.0065      |
| Prospective memory        | 0.442872557  | 0.0074 | 0.0148      |
| Reaction time             | -0.228002002 | 0.2351 | 0.2351      |
| Pairs matching            | -0.327496513 | 0.0704 | 0.078222222 |
| Matrix pattern completion | 0.456387352  | 0.0042 | 0.014       |
| Symbol digit substitution | 0.394847484  | 0.0192 | 0.027428571 |
| Tower rearranging         | 0.338529308  | 0.0613 | 0.076625    |
| Numeric trail making      | 0.441621796  | 0.0064 | 0.0148      |
| Alphanumeric trail making | 0.545641373  | 0      | 0           |

**Table S21: Main results of the replication sample.**

**A. Associations between total grey matter volume of the brain and the intake of cereal and coffee.**

| Associations between TGMV and the intake of cereal and coffee (baseline).  |         |         |         |       |        |        |              |       |
|----------------------------------------------------------------------------|---------|---------|---------|-------|--------|--------|--------------|-------|
|                                                                            | beta    | 95%CI_l | 95%CI_h | se    | t      | r      | p_one-tailed | df.e  |
| Cereal intake                                                              | 209.57  | 157.19  | 261.94  | 26.72 | 7.843  | 0.061  | 2.34E-15     | 16388 |
| Coffee intake                                                              | -296.37 | -375.04 | -217.71 | 40.13 | -7.385 | -0.058 | 7.99E-14     | 16307 |
| Associations between TGMV and the intake of cereal and coffee (Follow-up). |         |         |         |       |        |        |              |       |
|                                                                            | beta    | 95%CI_l | 95%CI_h | se    | t      | r      | p_one-tailed | df.e  |
| Cereal intake                                                              | 272.05  | 222.05  | 322.05  | 25.51 | 10.666 | 0.083  | 9.01E-27     | 16304 |
| Coffee intake                                                              | -277.84 | -362.70 | -192.99 | 43.29 | -6.418 | -0.050 | 7.09E-11     | 16244 |
| Associations between TGMV and the intake of cereal and coffee (Follow-up). |         |         |         |       |        |        |              |       |
|                                                                            | beta    | 95%CI_l | 95%CI_h | se    | t      | r      | p_one-tailed | df.e  |
| Cereal intake                                                              | 76.63   | 15.02   | 138.24  | 31.43 | 2.438  | 0.019  | 7.39E-03     | 16287 |
| Coffee intake                                                              | -229.29 | -335.37 | -123.21 | 54.12 | -4.237 | -0.033 | 1.14E-05     | 16159 |

**B: Associations between the GMV-association patterns of cognitive functions and the GMV-association patterns of the intake of cereal and coffee.**

|                           | Baseline      |              |               |              | Follow-up     |              |               |              |
|---------------------------|---------------|--------------|---------------|--------------|---------------|--------------|---------------|--------------|
|                           | Cereal intake |              | Coffee intake |              | Cereal intake |              | Coffee intake |              |
|                           | R             | P_one-tailed | R             | P_one-tailed | R             | P_one-tailed | R             | P_one-tailed |
| Fluid intelligence        | 0.538         | 6.0E-04      | NA            |              | 0.724         | 0.0E+00      | NA            |              |
| Matrix pattern completion | 0.776         | 0.0E+00      | -0.417        | 7.7E-03      | 0.782         | 0.0E+00      | -0.403        | 1.0E-02      |
| Symbol digit substitution | 0.853         | 0.0E+00      | -0.554        | 7.5E-04      | 0.769         | 0.0E+00      | -0.561        | 3.0E-04      |
| Numeric trail making      | 0.687         | 0.0E+00      | -0.547        | 4.5E-04      | 0.578         | 4.5E-04      | -0.536        | 1.2E-03      |
| Alphanumeric trail making | 0.741         | 0.0E+00      | -0.576        | 2.0E-04      | 0.770         | 0.0E+00      | -0.579        | 2.5E-04      |

**C. Associations between the GMV-association patterns of the cereal/coffee intake and the gene-expression patterns of CPLX gene.**

|           | Cereal intake |              | Coffee intake |              |
|-----------|---------------|--------------|---------------|--------------|
|           | R             | P_one-tailed | R             | P_one-tailed |
| CPLX gene | 0.396         | 1.1E-02      | -0.360        | 2.0E-02      |

**D. Association between the GMV-association patterns of the cognitive functions and the gene-expression patterns of CPLX gene.**

|                           | R     | P_one-tailed |
|---------------------------|-------|--------------|
| Fluid intelligence        | 0.476 | 1.4E-03      |
| Numeric memory            | 0.466 | 1.8E-03      |
| Prospective memory        | 0.388 | 1.1E-02      |
| Matrix pattern completion | 0.474 | 1.1E-03      |
| Symbol digit substitution | 0.468 | 1.8E-03      |
| Numeric trail making      | 0.463 | 2.1E-03      |
| Alphanumeric trail making | 0.500 | 7.0E-04      |

**Table S22: Results of modified mendelian randomisation analysis.**

| <b>A. Association between PRS for TGV and TGV.</b> |             |                |                |           |          |          |                     |             |
|----------------------------------------------------|-------------|----------------|----------------|-----------|----------|----------|---------------------|-------------|
| <b>PRS</b>                                         | <b>beta</b> | <b>95%CI_l</b> | <b>95%CI_h</b> | <b>se</b> | <b>t</b> | <b>r</b> | <b>p_one-tailed</b> | <b>df.e</b> |
| TGV PRS                                            | 1.90E-04    | 1.56E-04       | 2.24E-04       | 1.74E-05  | 10.951   | 0.097    | 4.39E-28            | 12736       |
| TGV/Cereal0.05 PRS                                 | 1.80E-04    | 1.45E-04       | 2.14E-04       | 1.77E-05  | 10.117   | 0.089    | 2.87E-24            | 12736       |
| TGV/Cereal0.10 PRS                                 | 1.73E-04    | 1.37E-04       | 2.08E-04       | 1.82E-05  | 9.488    | 0.084    | 1.39E-21            | 12736       |
| TGV/Cereal0.15 PRS                                 | 1.68E-04    | 1.31E-04       | 2.04E-04       | 1.86E-05  | 9.003    | 0.080    | 1.25E-19            | 12736       |
| TGV/Cereal0.20 PRS                                 | 1.67E-04    | 1.30E-04       | 2.05E-04       | 1.91E-05  | 8.744    | 0.077    | 1.27E-18            | 12736       |
| TGV/Cereal0.25 PRS                                 | 1.66E-04    | 1.28E-04       | 2.05E-04       | 1.98E-05  | 8.424    | 0.074    | 2.01E-17            | 12736       |
| TGV/Cereal0.30 PRS                                 | 1.69E-04    | 1.29E-04       | 2.09E-04       | 2.04E-05  | 8.260    | 0.073    | 8.01E-17            | 12736       |
| TGV/Cereal0.35 PRS                                 | 1.63E-04    | 1.21E-04       | 2.04E-04       | 2.11E-05  | 7.725    | 0.068    | 6.00E-15            | 12736       |
| TGV/Cereal0.40 PRS                                 | 1.74E-04    | 1.32E-04       | 2.17E-04       | 2.18E-05  | 7.984    | 0.071    | 7.66E-16            | 12736       |
| TGV/Cereal0.45 PRS                                 | 1.74E-04    | 1.30E-04       | 2.19E-04       | 2.26E-05  | 7.714    | 0.068    | 6.53E-15            | 12736       |
| TGV/Cereal0.50 PRS                                 | 1.83E-04    | 1.37E-04       | 2.29E-04       | 2.36E-05  | 7.763    | 0.069    | 4.46E-15            | 12736       |
| TGV/Coffee0.05 PRS                                 | 1.78E-04    | 1.43E-04       | 2.13E-04       | 1.78E-05  | 10.036   | 0.089    | 6.46E-24            | 12736       |
| TGV/Coffee0.10 PRS                                 | 1.78E-04    | 1.42E-04       | 2.14E-04       | 1.81E-05  | 9.820    | 0.087    | 5.58E-23            | 12736       |
| TGV/Coffee0.15 PRS                                 | 1.70E-04    | 1.34E-04       | 2.07E-04       | 1.86E-05  | 9.155    | 0.081    | 3.11E-20            | 12736       |
| TGV/Coffee0.20 PRS                                 | 1.78E-04    | 1.40E-04       | 2.15E-04       | 1.90E-05  | 9.332    | 0.082    | 6.06E-21            | 12736       |
| TGV/Coffee0.25 PRS                                 | 1.78E-04    | 1.40E-04       | 2.17E-04       | 1.96E-05  | 9.085    | 0.080    | 5.96E-20            | 12736       |
| TGV/Coffee0.30 PRS                                 | 1.76E-04    | 1.36E-04       | 2.16E-04       | 2.02E-05  | 8.708    | 0.077    | 1.74E-18            | 12736       |
| TGV/Coffee0.35 PRS                                 | 1.70E-04    | 1.29E-04       | 2.11E-04       | 2.09E-05  | 8.139    | 0.072    | 2.18E-16            | 12736       |
| TGV/Coffee0.40 PRS                                 | 1.67E-04    | 1.25E-04       | 2.10E-04       | 2.17E-05  | 7.721    | 0.068    | 6.21E-15            | 12736       |
| TGV/Coffee0.45 PRS                                 | 1.57E-04    | 1.13E-04       | 2.01E-04       | 2.26E-05  | 6.950    | 0.061    | 1.92E-12            | 12736       |
| TGV/Coffee0.50 PRS                                 | 1.57E-04    | 1.11E-04       | 2.03E-04       | 2.35E-05  | 6.678    | 0.059    | 1.26E-11            | 12736       |

| <b>B. Association between PRS for cereal intake and cereal intake.</b> |             |                |                |           |          |          |                     |             |
|------------------------------------------------------------------------|-------------|----------------|----------------|-----------|----------|----------|---------------------|-------------|
| <b>PRS</b>                                                             | <b>beta</b> | <b>95%CI_l</b> | <b>95%CI_h</b> | <b>se</b> | <b>t</b> | <b>r</b> | <b>p_one-tailed</b> | <b>df.e</b> |
| Cereal PRS                                                             | 3.37E-05    | 2.65E-05       | 4.09E-05       | 3.67E-06  | 9.197    | 0.081    | 2.13E-20            | 12739       |
| Cereal/TGV0.05 PRS                                                     | 3.29E-05    | 2.56E-05       | 4.01E-05       | 3.72E-06  | 8.832    | 0.078    | 5.80E-19            | 12739       |
| Cereal/TGV0.10 PRS                                                     | 3.33E-05    | 2.59E-05       | 4.08E-05       | 3.80E-06  | 8.773    | 0.077    | 9.77E-19            | 12739       |

|                    |          |          |          |          |       |       |          |       |
|--------------------|----------|----------|----------|----------|-------|-------|----------|-------|
| Cereal/TGV0.15 PRS | 3.44E-05 | 2.68E-05 | 4.20E-05 | 3.88E-06 | 8.884 | 0.078 | 3.66E-19 | 12739 |
| Cereal/TGV0.20 PRS | 3.44E-05 | 2.67E-05 | 4.22E-05 | 3.96E-06 | 8.688 | 0.077 | 2.08E-18 | 12739 |
| Cereal/TGV0.25 PRS | 3.42E-05 | 2.62E-05 | 4.21E-05 | 4.06E-06 | 8.414 | 0.074 | 2.20E-17 | 12739 |
| Cereal/TGV0.30 PRS | 3.48E-05 | 2.66E-05 | 4.30E-05 | 4.18E-06 | 8.322 | 0.074 | 4.75E-17 | 12739 |
| Cereal/TGV0.35 PRS | 3.34E-05 | 2.50E-05 | 4.19E-05 | 4.31E-06 | 7.755 | 0.069 | 4.75E-15 | 12739 |
| Cereal/TGV0.40 PRS | 3.15E-05 | 2.28E-05 | 4.02E-05 | 4.45E-06 | 7.082 | 0.063 | 7.45E-13 | 12739 |
| Cereal/TGV0.45 PRS | 3.04E-05 | 2.13E-05 | 3.95E-05 | 4.64E-06 | 6.541 | 0.058 | 3.17E-11 | 12739 |
| Cereal/TGV0.50 PRS | 3.14E-05 | 2.18E-05 | 4.10E-05 | 4.88E-06 | 6.441 | 0.057 | 6.16E-11 | 12739 |

### C. Association between PRS for coffee intake and coffee intake.

| PRS                | beta     | 95%CI_l  | 95%CI_h  | se       | t     | r     | p_one-tailed | df.e  |
|--------------------|----------|----------|----------|----------|-------|-------|--------------|-------|
| Coffee PRS         | 3.52E-05 | 2.70E-05 | 4.33E-05 | 4.15E-06 | 8.475 | 0.075 | 1.31E-17     | 12739 |
| Coffee/TGV0.05 PRS | 3.21E-05 | 2.40E-05 | 4.01E-05 | 4.11E-06 | 7.801 | 0.069 | 3.30E-15     | 12739 |
| Coffee/TGV0.10 PRS | 3.21E-05 | 2.39E-05 | 4.02E-05 | 4.16E-06 | 7.713 | 0.068 | 6.59E-15     | 12739 |
| Coffee/TGV0.15 PRS | 3.04E-05 | 2.20E-05 | 3.87E-05 | 4.25E-06 | 7.142 | 0.063 | 4.85E-13     | 12739 |
| Coffee/TGV0.20 PRS | 3.26E-05 | 2.41E-05 | 4.11E-05 | 4.35E-06 | 7.488 | 0.066 | 3.72E-14     | 12739 |
| Coffee/TGV0.25 PRS | 3.44E-05 | 2.57E-05 | 4.32E-05 | 4.46E-06 | 7.723 | 0.068 | 6.12E-15     | 12739 |
| Coffee/TGV0.30 PRS | 3.44E-05 | 2.54E-05 | 4.33E-05 | 4.58E-06 | 7.508 | 0.066 | 3.20E-14     | 12739 |
| Coffee/TGV0.35 PRS | 3.43E-05 | 2.51E-05 | 4.35E-05 | 4.70E-06 | 7.296 | 0.065 | 1.57E-13     | 12739 |
| Coffee/TGV0.40 PRS | 3.38E-05 | 2.42E-05 | 4.33E-05 | 4.87E-06 | 6.938 | 0.061 | 2.08E-12     | 12739 |
| Coffee/TGV0.45 PRS | 3.39E-05 | 2.40E-05 | 4.38E-05 | 5.06E-06 | 6.702 | 0.059 | 1.07E-11     | 12739 |
| Coffee/TGV0.50 PRS | 3.62E-05 | 2.59E-05 | 4.65E-05 | 5.23E-06 | 6.916 | 0.061 | 2.44E-12     | 12739 |

### D. Association between PRS for the intake of cereal/coffee and TGV.

| PRS                | beta     | 95%CI_l   | 95%CI_h  | se       | t     | r     | p_one-tailed | df.e  |
|--------------------|----------|-----------|----------|----------|-------|-------|--------------|-------|
| Cereal PRS         | 2.67E-09 | 4.90E-10  | 4.85E-09 | 1.11E-09 | 2.400 | 0.021 | 8.20E-03     | 12736 |
| Cereal/TGV0.05 PRS | 2.03E-09 | -1.88E-10 | 4.24E-09 | 1.13E-09 | 1.794 | 0.016 | 3.64E-02     | 12736 |
| Cereal/TGV0.10 PRS | 1.67E-09 | -5.92E-10 | 3.93E-09 | 1.15E-09 | 1.446 | 0.013 | 7.40E-02     | 12736 |
| Cereal/TGV0.15 PRS | 1.82E-09 | -4.82E-10 | 4.13E-09 | 1.18E-09 | 1.551 | 0.014 | 6.05E-02     | 12736 |
| Cereal/TGV0.20 PRS | 1.99E-09 | -3.63E-10 | 4.35E-09 | 1.20E-09 | 1.658 | 0.015 | 4.86E-02     | 12736 |
| Cereal/TGV0.25 PRS | 2.02E-09 | -3.96E-10 | 4.44E-09 | 1.23E-09 | 1.639 | 0.015 | 5.06E-02     | 12736 |



|                    |           |           |           |          |        |        |          |       |
|--------------------|-----------|-----------|-----------|----------|--------|--------|----------|-------|
| Cereal/TGV0.30 PRS | 2.03E-09  | -4.55E-10 | 4.52E-09  | 1.27E-09 | 1.602  | 0.014  | 5.46E-02 | 12736 |
| Cereal/TGV0.35 PRS | 2.29E-09  | -2.72E-10 | 4.85E-09  | 1.31E-09 | 1.752  | 0.016  | 3.99E-02 | 12736 |
| Cereal/TGV0.40 PRS | 2.12E-09  | -5.23E-10 | 4.77E-09  | 1.35E-09 | 1.573  | 0.014  | 5.79E-02 | 12736 |
| Cereal/TGV0.45 PRS | 1.85E-09  | -9.12E-10 | 4.60E-09  | 1.41E-09 | 1.312  | 0.012  | 9.47E-02 | 12736 |
| Cereal/TGV0.50 PRS | 1.94E-09  | -9.54E-10 | 4.84E-09  | 1.48E-09 | 1.315  | 0.012  | 9.43E-02 | 12736 |
| Coffee PRS         | -2.50E-09 | -4.15E-09 | -8.52E-10 | 8.42E-10 | -2.973 | -0.026 | 1.48E-03 | 12736 |
| Coffee/TGV0.05 PRS | -2.27E-09 | -3.91E-09 | -6.41E-10 | 8.33E-10 | -2.730 | -0.024 | 3.17E-03 | 12736 |
| Coffee/TGV0.10 PRS | -2.13E-09 | -3.78E-09 | -4.80E-10 | 8.43E-10 | -2.529 | -0.022 | 5.72E-03 | 12736 |
| Coffee/TGV0.15 PRS | -1.97E-09 | -3.66E-09 | -2.77E-10 | 8.62E-10 | -2.281 | -0.020 | 1.13E-02 | 12736 |
| Coffee/TGV0.20 PRS | -1.92E-09 | -3.65E-09 | -1.85E-10 | 8.83E-10 | -2.170 | -0.019 | 1.50E-02 | 12736 |
| Coffee/TGV0.25 PRS | -2.25E-09 | -4.02E-09 | -4.74E-10 | 9.04E-10 | -2.485 | -0.022 | 6.49E-03 | 12736 |
| Coffee/TGV0.30 PRS | -1.94E-09 | -3.76E-09 | -1.21E-10 | 9.28E-10 | -2.091 | -0.019 | 1.83E-02 | 12736 |
| Coffee/TGV0.35 PRS | -2.09E-09 | -3.96E-09 | -2.21E-10 | 9.54E-10 | -2.192 | -0.019 | 1.42E-02 | 12736 |
| Coffee/TGV0.40 PRS | -1.66E-09 | -3.60E-09 | 2.71E-10  | 9.86E-10 | -1.686 | -0.015 | 4.59E-02 | 12736 |
| Coffee/TGV0.45 PRS | -1.87E-09 | -3.88E-09 | 1.37E-10  | 1.03E-09 | -1.827 | -0.016 | 3.39E-02 | 12736 |
| Coffee/TGV0.50 PRS | -1.85E-09 | -3.93E-09 | 2.32E-10  | 1.06E-09 | -1.742 | -0.015 | 4.08E-02 | 12736 |

#### E. Association between PRS for TGV and cereal intake.

| PRS                | beta      | 95%CI_l   | 95%CI_h  | se       | t      | r      | p_one-tailed | df.e  |
|--------------------|-----------|-----------|----------|----------|--------|--------|--------------|-------|
| TGV PRS            | 4.56E-02  | -6.75E-02 | 1.59E-01 | 5.77E-02 | 0.790  | 0.007  | 2.15E-01     | 12739 |
| TGV/Cereal0.05 PRS | 1.95E-02  | -9.59E-02 | 1.35E-01 | 5.89E-02 | 0.331  | 0.003  | 3.70E-01     | 12739 |
| TGV/Cereal0.10 PRS | 3.24E-04  | -1.18E-01 | 1.19E-01 | 6.03E-02 | 0.005  | 0.000  | 4.98E-01     | 12739 |
| TGV/Cereal0.15 PRS | 1.88E-02  | -1.02E-01 | 1.40E-01 | 6.18E-02 | 0.304  | 0.003  | 3.81E-01     | 12739 |
| TGV/Cereal0.20 PRS | 4.10E-03  | -1.20E-01 | 1.28E-01 | 6.34E-02 | 0.065  | 0.001  | 4.74E-01     | 12739 |
| TGV/Cereal0.25 PRS | 2.32E-04  | -1.28E-01 | 1.29E-01 | 6.55E-02 | 0.004  | 0.000  | 4.99E-01     | 12739 |
| TGV/Cereal0.30 PRS | 1.24E-02  | -1.20E-01 | 1.45E-01 | 6.77E-02 | 0.183  | 0.002  | 4.27E-01     | 12739 |
| TGV/Cereal0.35 PRS | 9.69E-04  | -1.36E-01 | 1.38E-01 | 6.97E-02 | 0.014  | 0.000  | 4.94E-01     | 12739 |
| TGV/Cereal0.40 PRS | -7.60E-03 | -1.49E-01 | 1.34E-01 | 7.24E-02 | -0.105 | -0.001 | 4.58E-01     | 12739 |
| TGV/Cereal0.45 PRS | -6.75E-03 | -1.54E-01 | 1.40E-01 | 7.49E-02 | -0.090 | -0.001 | 4.64E-01     | 12739 |
| TGV/Cereal0.50 PRS | -1.12E-02 | -1.64E-01 | 1.42E-01 | 7.80E-02 | -0.143 | -0.001 | 4.43E-01     | 12739 |

---

**F. Association between PRS for TGV and coffee intake.**

---

| <b>PRS</b>         | <b>beta</b> | <b>95%CI_l</b> | <b>95%CI_h</b> | <b>se</b> | <b>t</b> | <b>r</b> | <b>p_one-tailed</b> | <b>df.e</b> |
|--------------------|-------------|----------------|----------------|-----------|----------|----------|---------------------|-------------|
| TGV PRS            | -5.98E-02   | -2.29E-01      | 1.09E-01       | 8.63E-02  | -0.693   | -0.006   | 2.44E-01            | 12739       |
| TGV/Coffee0.05 PRS | -3.35E-02   | -2.06E-01      | 1.39E-01       | 8.82E-02  | -0.380   | -0.003   | 3.52E-01            | 12739       |
| TGV/Coffee0.10 PRS | -5.62E-02   | -2.33E-01      | 1.20E-01       | 9.00E-02  | -0.625   | -0.006   | 2.66E-01            | 12739       |
| TGV/Coffee0.15 PRS | -5.01E-02   | -2.31E-01      | 1.31E-01       | 9.22E-02  | -0.544   | -0.005   | 2.93E-01            | 12739       |
| TGV/Coffee0.20 PRS | -5.19E-02   | -2.37E-01      | 1.33E-01       | 9.45E-02  | -0.549   | -0.005   | 2.92E-01            | 12739       |
| TGV/Coffee0.25 PRS | -4.28E-02   | -2.33E-01      | 1.48E-01       | 9.72E-02  | -0.440   | -0.004   | 3.30E-01            | 12739       |
| TGV/Coffee0.30 PRS | -3.75E-02   | -2.34E-01      | 1.59E-01       | 1.00E-01  | -0.374   | -0.003   | 3.54E-01            | 12739       |
| TGV/Coffee0.35 PRS | -6.02E-02   | -2.63E-01      | 1.43E-01       | 1.03E-01  | -0.582   | -0.005   | 2.80E-01            | 12739       |
| TGV/Coffee0.40 PRS | -5.62E-02   | -2.67E-01      | 1.54E-01       | 1.07E-01  | -0.524   | -0.005   | 3.00E-01            | 12739       |
| TGV/Coffee0.45 PRS | -6.96E-02   | -2.89E-01      | 1.50E-01       | 1.12E-01  | -0.623   | -0.006   | 2.67E-01            | 12739       |
| TGV/Coffee0.50 PRS | -3.06E-02   | -2.59E-01      | 1.98E-01       | 1.16E-01  | -0.263   | -0.002   | 3.96E-01            | 12739       |

---

**Table S23: GO terms for genes via the clusterProfiler package.**

| <b>A. GO terms for the overlap between the transcription-related genes and the coffee-intake-related genes.</b> |            |                                                                               |                  |                |               |                 |               |
|-----------------------------------------------------------------------------------------------------------------|------------|-------------------------------------------------------------------------------|------------------|----------------|---------------|-----------------|---------------|
| <b>ONTOLOGY</b>                                                                                                 | <b>ID</b>  | <b>Description</b>                                                            | <b>GeneRatio</b> | <b>BgRatio</b> | <b>pvalue</b> | <b>p.adjust</b> | <b>qvalue</b> |
| BP                                                                                                              | GO:0001580 | detection of chemical stimulus involved in sensory perception of bitter taste | 3/13             | 29/17913       | 1.08E-06      | 1.22E-04        | 8.73E-05      |
| BP                                                                                                              | GO:0050913 | sensory perception of bitter taste                                            | 3/13             | 34/17913       | 1.76E-06      | 1.22E-04        | 8.73E-05      |
| BP                                                                                                              | GO:0050912 | detection of chemical stimulus involved in sensory perception of taste        | 3/13             | 35/17913       | 1.93E-06      | 1.22E-04        | 8.73E-05      |
| BP                                                                                                              | GO:0050909 | sensory perception of taste                                                   | 3/13             | 57/17913       | 8.54E-06      | 4.06E-04        | 2.90E-04      |
| MF                                                                                                              | GO:0033038 | bitter taste receptor activity                                                | 3/12             | 18/16969       | 2.19E-07      | 5.70E-06        | 3.46E-06      |
| MF                                                                                                              | GO:0008527 | taste receptor activity                                                       | 3/12             | 24/16969       | 5.42E-07      | 7.05E-06        | 4.28E-06      |
| <b>B. GO terms for the transcription-related specific genes.</b>                                                |            |                                                                               |                  |                |               |                 |               |
| <b>ONTOLOGY</b>                                                                                                 | <b>ID</b>  | <b>Description</b>                                                            | <b>GeneRatio</b> | <b>BgRatio</b> | <b>pvalue</b> | <b>p.adjust</b> | <b>qvalue</b> |
| BP                                                                                                              | GO:0009150 | purine ribonucleotide metabolic process                                       | 77/1423          | 500/17913      | 1.27E-08      | 6.93E-05        | 6.49E-05      |
| BP                                                                                                              | GO:0050808 | synapse organization                                                          | 62/1423          | 394/17913      | 1.54E-07      | 4.18E-04        | 3.92E-04      |
| BP                                                                                                              | GO:0009199 | ribonucleoside triphosphate metabolic process                                 | 52/1423          | 319/17913      | 5.08E-07      | 6.63E-04        | 6.20E-04      |
| BP                                                                                                              | GO:0009141 | nucleoside triphosphate metabolic process                                     | 54/1423          | 337/17913      | 5.39E-07      | 6.63E-04        | 6.20E-04      |
| BP                                                                                                              | GO:0009144 | purine nucleoside triphosphate metabolic process                              | 52/1423          | 321/17913      | 6.19E-07      | 6.63E-04        | 6.20E-04      |
| BP                                                                                                              | GO:0009205 | purine ribonucleoside triphosphate metabolic process                          | 51/1423          | 314/17913      | 7.30E-07      | 6.63E-04        | 6.20E-04      |
| BP                                                                                                              | GO:0099132 | ATP hydrolysis coupled cation transmembrane transport                         | 16/1423          | 54/17913       | 2.68E-06      | 2.09E-03        | 1.95E-03      |
| BP                                                                                                              | GO:0046034 | ATP metabolic process                                                         | 46/1423          | 287/17913      | 3.64E-06      | 2.48E-03        | 2.32E-03      |
| BP                                                                                                              | GO:0009167 | purine ribonucleoside monophosphate metabolic process                         | 49/1423          | 317/17913      | 5.04E-06      | 3.00E-03        | 2.81E-03      |
| BP                                                                                                              | GO:0009126 | purine nucleoside monophosphate metabolic process                             | 49/1423          | 318/17913      | 5.51E-06      | 3.00E-03        | 2.81E-03      |
| BP                                                                                                              | GO:0009161 | ribonucleoside monophosphate metabolic process                                | 50/1423          | 331/17913      | 7.81E-06      | 3.87E-03        | 3.62E-03      |
| BP                                                                                                              | GO:0050807 | regulation of synapse organization                                            | 36/1423          | 218/17913      | 2.08E-05      | 9.45E-03        | 8.85E-03      |
| BP                                                                                                              | GO:0099175 | regulation of postsynapse organization                                        | 21/1423          | 98/17913       | 2.30E-05      | 9.62E-03        | 9.00E-03      |
| BP                                                                                                              | GO:0099177 | regulation of trans-synaptic signaling                                        | 55/1423          | 394/17913      | 2.90E-05      | 9.99E-03        | 9.35E-03      |

|    |            |                                                                           |         |           |          |          |          |
|----|------------|---------------------------------------------------------------------------|---------|-----------|----------|----------|----------|
| BP | GO:0009152 | purine ribonucleotide biosynthetic process                                | 41/1423 | 266/17913 | 3.10E-05 | 9.99E-03 | 9.35E-03 |
| BP | GO:0050803 | regulation of synapse structure or activity                               | 36/1423 | 222/17913 | 3.11E-05 | 9.99E-03 | 9.35E-03 |
| BP | GO:0046390 | ribose phosphate biosynthetic process                                     | 43/1423 | 284/17913 | 3.12E-05 | 9.99E-03 | 9.35E-03 |
| BP | GO:0009123 | nucleoside monophosphate metabolic process                                | 50/1423 | 349/17913 | 3.33E-05 | 1.01E-02 | 9.43E-03 |
| BP | GO:0009260 | ribonucleotide biosynthetic process                                       | 42/1423 | 279/17913 | 4.40E-05 | 1.26E-02 | 1.18E-02 |
| BP | GO:0099173 | postsynapse organization                                                  | 28/1423 | 158/17913 | 4.66E-05 | 1.27E-02 | 1.19E-02 |
| BP | GO:0050804 | modulation of chemical synaptic transmission                              | 54/1423 | 393/17913 | 5.27E-05 | 1.34E-02 | 1.25E-02 |
| BP | GO:0045333 | cellular respiration                                                      | 30/1423 | 176/17913 | 5.41E-05 | 1.34E-02 | 1.25E-02 |
| BP | GO:0051963 | regulation of synapse assembly                                            | 21/1423 | 105/17913 | 6.75E-05 | 1.60E-02 | 1.49E-02 |
| BP | GO:0010506 | regulation of autophagy                                                   | 45/1423 | 314/17913 | 8.02E-05 | 1.82E-02 | 1.70E-02 |
| BP | GO:0007416 | synapse assembly                                                          | 29/1423 | 172/17913 | 8.74E-05 | 1.85E-02 | 1.73E-02 |
| BP | GO:0006090 | pyruvate metabolic process                                                | 26/1423 | 147/17913 | 8.85E-05 | 1.85E-02 | 1.73E-02 |
| BP | GO:0060271 | cilium assembly                                                           | 47/1423 | 335/17913 | 9.50E-05 | 1.92E-02 | 1.79E-02 |
| BP | GO:0006164 | purine nucleotide biosynthetic process                                    | 41/1423 | 280/17913 | 1.01E-04 | 1.97E-02 | 1.84E-02 |
| BP | GO:0072522 | purine-containing compound biosynthetic process                           | 42/1423 | 291/17913 | 1.16E-04 | 2.19E-02 | 2.05E-02 |
| BP | GO:0070646 | protein modification by small protein removal                             | 40/1423 | 273/17913 | 1.21E-04 | 2.19E-02 | 2.05E-02 |
| BP | GO:0048489 | synaptic vesicle transport                                                | 23/1423 | 126/17913 | 1.36E-04 | 2.24E-02 | 2.10E-02 |
| BP | GO:0097480 | establishment of synaptic vesicle localization                            | 23/1423 | 126/17913 | 1.36E-04 | 2.24E-02 | 2.10E-02 |
| BP | GO:0007005 | mitochondrion organization                                                | 60/1423 | 466/17913 | 1.36E-04 | 2.24E-02 | 2.10E-02 |
| BP | GO:0099150 | regulation of postsynaptic specialization assembly                        | 6/1423  | 12/17913  | 1.51E-04 | 2.30E-02 | 2.15E-02 |
| BP | GO:0150052 | regulation of postsynapse assembly                                        | 6/1423  | 12/17913  | 1.51E-04 | 2.30E-02 | 2.15E-02 |
| BP | GO:0010975 | regulation of neuron projection development                               | 59/1423 | 458/17913 | 1.52E-04 | 2.30E-02 | 2.15E-02 |
| BP | GO:0044782 | cilium organization                                                       | 47/1423 | 346/17913 | 2.06E-04 | 3.03E-02 | 2.83E-02 |
| BP | GO:0099003 | vesicle-mediated transport in synapse                                     | 28/1423 | 174/17913 | 2.58E-04 | 3.46E-02 | 3.24E-02 |
| BP | GO:0070296 | sarcoplasmic reticulum calcium ion transport                              | 11/1423 | 41/17913  | 2.60E-04 | 3.46E-02 | 3.24E-02 |
| BP | GO:0031123 | RNA 3'-end processing                                                     | 20/1423 | 107/17913 | 2.61E-04 | 3.46E-02 | 3.24E-02 |
| BP | GO:0051656 | establishment of organelle localization                                   | 57/1423 | 448/17913 | 2.69E-04 | 3.46E-02 | 3.24E-02 |
| BP | GO:0016241 | regulation of macroautophagy                                              | 27/1423 | 166/17913 | 2.76E-04 | 3.46E-02 | 3.24E-02 |
| BP | GO:0014808 | release of sequestered calcium ion into cytosol by sarcoplasmic reticulum | 10/1423 | 35/17913  | 2.82E-04 | 3.46E-02 | 3.24E-02 |

|    |            |                                                                                         |         |           |          |          |          |
|----|------------|-----------------------------------------------------------------------------------------|---------|-----------|----------|----------|----------|
| BP | GO:0070932 | histone H3 deacetylation                                                                | 7/1423  | 18/17913  | 2.86E-04 | 3.46E-02 | 3.24E-02 |
| BP | GO:0098698 | postsynaptic specialization assembly                                                    | 7/1423  | 18/17913  | 2.86E-04 | 3.46E-02 | 3.24E-02 |
| BP | GO:0071426 | ribonucleoprotein complex export from nucleus                                           | 21/1423 | 116/17913 | 2.93E-04 | 3.46E-02 | 3.24E-02 |
| BP | GO:0022406 | membrane docking                                                                        | 25/1423 | 150/17913 | 3.13E-04 | 3.46E-02 | 3.24E-02 |
| BP | GO:0051168 | nuclear export                                                                          | 28/1423 | 176/17913 | 3.13E-04 | 3.46E-02 | 3.24E-02 |
| BP | GO:0051169 | nuclear transport                                                                       | 42/1423 | 305/17913 | 3.27E-04 | 3.46E-02 | 3.24E-02 |
| BP | GO:0051208 | sequestering of calcium ion                                                             | 21/1423 | 117/17913 | 3.31E-04 | 3.46E-02 | 3.24E-02 |
| BP | GO:0071166 | ribonucleoprotein complex localization                                                  | 21/1423 | 117/17913 | 3.31E-04 | 3.46E-02 | 3.24E-02 |
| BP | GO:0034248 | regulation of cellular amide metabolic process                                          | 57/1423 | 452/17913 | 3.38E-04 | 3.46E-02 | 3.24E-02 |
| BP | GO:0097553 | calcium ion transmembrane import into cytosol                                           | 22/1423 | 126/17913 | 3.61E-04 | 3.46E-02 | 3.24E-02 |
| BP | GO:0015682 | ferric iron transport                                                                   | 10/1423 | 36/17913  | 3.62E-04 | 3.46E-02 | 3.24E-02 |
| BP | GO:0033572 | transferrin transport                                                                   | 10/1423 | 36/17913  | 3.62E-04 | 3.46E-02 | 3.24E-02 |
| BP | GO:0072512 | trivalent inorganic cation transport                                                    | 10/1423 | 36/17913  | 3.62E-04 | 3.46E-02 | 3.24E-02 |
| BP | GO:1903514 | release of sequestered calcium ion into cytosol by endoplasmic reticulum                | 10/1423 | 36/17913  | 3.62E-04 | 3.46E-02 | 3.24E-02 |
| BP | GO:1901293 | nucleoside phosphate biosynthetic process                                               | 48/1423 | 365/17913 | 3.78E-04 | 3.52E-02 | 3.30E-02 |
| BP | GO:0016579 | protein deubiquitination                                                                | 37/1423 | 260/17913 | 3.82E-04 | 3.52E-02 | 3.30E-02 |
| BP | GO:0097479 | synaptic vesicle localization                                                           | 23/1423 | 137/17913 | 4.80E-04 | 4.15E-02 | 3.88E-02 |
| BP | GO:0006611 | protein export from nucleus                                                             | 26/1423 | 163/17913 | 4.84E-04 | 4.15E-02 | 3.88E-02 |
| BP | GO:0051209 | release of sequestered calcium ion into cytosol                                         | 20/1423 | 112/17913 | 4.86E-04 | 4.15E-02 | 3.88E-02 |
| BP | GO:0051283 | negative regulation of sequestering of calcium ion                                      | 20/1423 | 112/17913 | 4.86E-04 | 4.15E-02 | 3.88E-02 |
| BP | GO:0015991 | ATP hydrolysis coupled proton transport                                                 | 8/1423  | 25/17913  | 4.93E-04 | 4.15E-02 | 3.88E-02 |
| BP | GO:0010880 | regulation of release of sequestered calcium ion into cytosol by sarcoplasmic reticulum | 9/1423  | 31/17913  | 4.97E-04 | 4.15E-02 | 3.88E-02 |
| BP | GO:0051028 | mRNA transport                                                                          | 24/1423 | 146/17913 | 5.03E-04 | 4.15E-02 | 3.88E-02 |
| BP | GO:0006913 | nucleocytoplasmic transport                                                             | 41/1423 | 302/17913 | 5.14E-04 | 4.17E-02 | 3.91E-02 |
| BP | GO:0009201 | ribonucleoside triphosphate biosynthetic process                                        | 26/1423 | 164/17913 | 5.33E-04 | 4.27E-02 | 3.99E-02 |
| BP | GO:0055117 | regulation of cardiac muscle contraction                                                | 16/1423 | 81/17913  | 5.54E-04 | 4.29E-02 | 4.01E-02 |
| BP | GO:0021548 | pons development                                                                        | 5/1423  | 10/17913  | 5.64E-04 | 4.29E-02 | 4.01E-02 |
| BP | GO:0060456 | positive regulation of digestive system process                                         | 5/1423  | 10/17913  | 5.64E-04 | 4.29E-02 | 4.01E-02 |

|    |            |                                                                                 |         |           |          |          |          |
|----|------------|---------------------------------------------------------------------------------|---------|-----------|----------|----------|----------|
| BP | GO:0031124 | mRNA 3'-end processing                                                          | 17/1423 | 89/17913  | 5.67E-04 | 4.29E-02 | 4.01E-02 |
| BP | GO:0006405 | RNA export from nucleus                                                         | 21/1423 | 122/17913 | 5.91E-04 | 4.41E-02 | 4.12E-02 |
| BP | GO:0031503 | protein-containing complex localization                                         | 34/1423 | 238/17913 | 6.01E-04 | 4.41E-02 | 4.12E-02 |
| BP | GO:1903902 | positive regulation of viral life cycle                                         | 13/1423 | 59/17913  | 6.07E-04 | 4.41E-02 | 4.12E-02 |
| BP | GO:0051282 | regulation of sequestering of calcium ion                                       | 20/1423 | 114/17913 | 6.15E-04 | 4.41E-02 | 4.13E-02 |
| BP | GO:0023061 | signal release                                                                  | 54/1423 | 433/17913 | 6.25E-04 | 4.42E-02 | 4.14E-02 |
| BP | GO:0009142 | nucleoside triphosphate biosynthetic process                                    | 27/1423 | 175/17913 | 6.50E-04 | 4.48E-02 | 4.19E-02 |
| BP | GO:1901292 | nucleoside phosphate catabolic process                                          | 27/1423 | 175/17913 | 6.50E-04 | 4.48E-02 | 4.19E-02 |
| BP | GO:0015988 | energy coupled proton transmembrane transport, against electrochemical gradient | 8/1423  | 26/17913  | 6.63E-04 | 4.51E-02 | 4.22E-02 |
| BP | GO:0050657 | nucleic acid transport                                                          | 27/1423 | 176/17913 | 7.10E-04 | 4.63E-02 | 4.34E-02 |
| BP | GO:0050658 | RNA transport                                                                   | 27/1423 | 176/17913 | 7.10E-04 | 4.63E-02 | 4.34E-02 |
| BP | GO:0006406 | mRNA export from nucleus                                                        | 19/1423 | 107/17913 | 7.15E-04 | 4.63E-02 | 4.34E-02 |
| BP | GO:0071427 | mRNA-containing ribonucleoprotein complex export from nucleus                   | 19/1423 | 107/17913 | 7.15E-04 | 4.63E-02 | 4.34E-02 |
| BP | GO:0009206 | purine ribonucleoside triphosphate biosynthetic process                         | 25/1423 | 159/17913 | 7.64E-04 | 4.85E-02 | 4.54E-02 |
| BP | GO:0009135 | purine nucleoside diphosphate metabolic process                                 | 22/1423 | 133/17913 | 7.75E-04 | 4.85E-02 | 4.54E-02 |
| BP | GO:0009179 | purine ribonucleoside diphosphate metabolic process                             | 22/1423 | 133/17913 | 7.75E-04 | 4.85E-02 | 4.54E-02 |
| CC | GO:0033267 | axon part                                                                       | 54/1472 | 354/18678 | 2.03E-06 | 1.31E-03 | 1.08E-03 |
| CC | GO:0098978 | glutamatergic synapse                                                           | 51/1472 | 352/18678 | 1.67E-05 | 4.36E-03 | 3.59E-03 |
| CC | GO:0097060 | synaptic membrane                                                               | 55/1472 | 395/18678 | 2.52E-05 | 4.36E-03 | 3.59E-03 |
| CC | GO:0043025 | neuronal cell body                                                              | 61/1472 | 454/18678 | 2.79E-05 | 4.36E-03 | 3.59E-03 |
| CC | GO:0098793 | presynapse                                                                      | 59/1472 | 438/18678 | 3.49E-05 | 4.36E-03 | 3.59E-03 |
| CC | GO:0150034 | distal axon                                                                     | 40/1472 | 262/18678 | 4.05E-05 | 4.36E-03 | 3.59E-03 |
| CC | GO:0045211 | postsynaptic membrane                                                           | 43/1472 | 299/18678 | 8.88E-05 | 8.19E-03 | 6.75E-03 |
| CC | GO:0016469 | proton-transporting two-sector ATPase complex                                   | 12/1472 | 44/18678  | 1.07E-04 | 8.68E-03 | 7.16E-03 |
| CC | GO:0043204 | perikaryon                                                                      | 23/1472 | 127/18678 | 1.37E-04 | 9.71E-03 | 8.01E-03 |
| CC | GO:0044306 | neuron projection terminus                                                      | 22/1472 | 120/18678 | 1.57E-04 | 9.71E-03 | 8.01E-03 |
| CC | GO:0098798 | mitochondrial protein complex                                                   | 35/1472 | 233/18678 | 1.65E-04 | 9.71E-03 | 8.01E-03 |
| CC | GO:0048786 | presynaptic active zone                                                         | 14/1472 | 60/18678  | 1.85E-04 | 9.94E-03 | 8.20E-03 |

|    |            |                                              |         |           |          |          |          |
|----|------------|----------------------------------------------|---------|-----------|----------|----------|----------|
| CC | GO:0036464 | cytoplasmic ribonucleoprotein granule        | 28/1472 | 176/18678 | 2.76E-04 | 1.37E-02 | 1.13E-02 |
| CC | GO:0043679 | axon terminus                                | 19/1472 | 101/18678 | 3.06E-04 | 1.38E-02 | 1.14E-02 |
| CC | GO:0034399 | nuclear periphery                            | 22/1472 | 126/18678 | 3.24E-04 | 1.38E-02 | 1.14E-02 |
| CC | GO:0000922 | spindle pole                                 | 25/1472 | 152/18678 | 3.42E-04 | 1.38E-02 | 1.14E-02 |
| CC | GO:0035770 | ribonucleoprotein granule                    | 29/1472 | 188/18678 | 3.69E-04 | 1.40E-02 | 1.16E-02 |
| CC | GO:0016363 | nuclear matrix                               | 19/1472 | 106/18678 | 5.76E-04 | 2.07E-02 | 1.71E-02 |
| CC | GO:0098800 | inner mitochondrial membrane protein complex | 20/1472 | 115/18678 | 6.26E-04 | 2.13E-02 | 1.75E-02 |
| CC | GO:0005681 | spliceosomal complex                         | 25/1472 | 160/18678 | 7.50E-04 | 2.42E-02 | 2.00E-02 |
| CC | GO:0010494 | cytoplasmic stress granule                   | 12/1472 | 55/18678  | 9.96E-04 | 3.02E-02 | 2.49E-02 |
| CC | GO:0098984 | neuron to neuron synapse                     | 41/1472 | 315/18678 | 1.03E-03 | 3.02E-02 | 2.49E-02 |
| CC | GO:0099240 | intrinsic component of synaptic membrane     | 25/1472 | 164/18678 | 1.08E-03 | 3.03E-02 | 2.50E-02 |
| CC | GO:0001725 | stress fiber                                 | 12/1472 | 56/18678  | 1.18E-03 | 3.05E-02 | 2.51E-02 |
| CC | GO:0097517 | contractile actin filament bundle            | 12/1472 | 56/18678  | 1.18E-03 | 3.05E-02 | 2.51E-02 |
| CC | GO:0070469 | respiratory chain                            | 16/1472 | 88/18678  | 1.30E-03 | 3.21E-02 | 2.65E-02 |
| CC | GO:0005747 | mitochondrial respiratory chain complex I    | 11/1472 | 50/18678  | 1.49E-03 | 3.21E-02 | 2.65E-02 |
| CC | GO:0030964 | NADH dehydrogenase complex                   | 11/1472 | 50/18678  | 1.49E-03 | 3.21E-02 | 2.65E-02 |
| CC | GO:0045271 | respiratory chain complex I                  | 11/1472 | 50/18678  | 1.49E-03 | 3.21E-02 | 2.65E-02 |
| CC | GO:0060198 | clathrin-sculpted vesicle                    | 5/1472  | 12/18678  | 1.49E-03 | 3.21E-02 | 2.65E-02 |
| CC | GO:0042734 | presynaptic membrane                         | 22/1472 | 141/18678 | 1.54E-03 | 3.21E-02 | 2.65E-02 |
| CC | GO:0043197 | dendritic spine                              | 22/1472 | 142/18678 | 1.69E-03 | 3.41E-02 | 2.81E-02 |
| CC | GO:0032432 | actin filament bundle                        | 12/1472 | 59/18678  | 1.90E-03 | 3.62E-02 | 2.98E-02 |
| CC | GO:0005759 | mitochondrial matrix                         | 53/1472 | 448/18678 | 1.93E-03 | 3.62E-02 | 2.98E-02 |
| CC | GO:0042641 | actomyosin                                   | 13/1472 | 67/18678  | 1.96E-03 | 3.62E-02 | 2.98E-02 |
| CC | GO:0044309 | neuron spine                                 | 22/1472 | 145/18678 | 2.22E-03 | 3.91E-02 | 3.23E-02 |
| CC | GO:0005635 | nuclear envelope                             | 50/1472 | 420/18678 | 2.24E-03 | 3.91E-02 | 3.23E-02 |
| CC | GO:0098936 | intrinsic component of postsynaptic membrane | 19/1472 | 120/18678 | 2.63E-03 | 4.37E-02 | 3.60E-02 |
| CC | GO:0031965 | nuclear membrane                             | 36/1472 | 281/18678 | 2.64E-03 | 4.37E-02 | 3.60E-02 |
| CC | GO:0005743 | mitochondrial inner membrane                 | 52/1472 | 445/18678 | 2.75E-03 | 4.37E-02 | 3.60E-02 |
| CC | GO:0099634 | postsynaptic specialization membrane         | 15/1472 | 86/18678  | 2.77E-03 | 4.37E-02 | 3.60E-02 |
| CC | GO:0032279 | asymmetric synapse                           | 37/1472 | 294/18678 | 3.15E-03 | 4.64E-02 | 3.83E-02 |

|    |            |                                                                 |         |           |          |          |          |
|----|------------|-----------------------------------------------------------------|---------|-----------|----------|----------|----------|
| CC | GO:0016607 | nuclear speck                                                   | 46/1472 | 386/18678 | 3.21E-03 | 4.64E-02 | 3.83E-02 |
| CC | GO:0005746 | mitochondrial respiratory chain                                 | 14/1472 | 79/18678  | 3.25E-03 | 4.64E-02 | 3.83E-02 |
| CC | GO:0000159 | protein phosphatase type 2A complex                             | 5/1472  | 14/18678  | 3.31E-03 | 4.64E-02 | 3.83E-02 |
| CC | GO:0033178 | proton-transporting two-sector ATPase complex, catalytic domain | 5/1472  | 14/18678  | 3.31E-03 | 4.64E-02 | 3.83E-02 |
| CC | GO:0099572 | postsynaptic specialization                                     | 39/1472 | 316/18678 | 3.49E-03 | 4.76E-02 | 3.92E-02 |
| CC | GO:0005874 | microtubule                                                     | 43/1472 | 357/18678 | 3.53E-03 | 4.76E-02 | 3.92E-02 |

### C. GO terms for the coffee-intake-related specific genes.

| ONTOLOGY | ID         | Description                              | GeneRatio | BgRatio   | pvalue   | p.adjust | qvalue   |
|----------|------------|------------------------------------------|-----------|-----------|----------|----------|----------|
| BP       | GO:0071248 | cellular response to metal ion           | 9/161     | 167/17913 | 2.04E-05 | 2.70E-02 | 2.61E-02 |
| BP       | GO:0071294 | cellular response to zinc ion            | 4/161     | 19/17913  | 2.19E-05 | 2.70E-02 | 2.61E-02 |
| BP       | GO:0071241 | cellular response to inorganic substance | 9/161     | 194/17913 | 6.60E-05 | 4.23E-02 | 4.08E-02 |
| BP       | GO:0006706 | steroid catabolic process                | 4/161     | 25/17913  | 6.86E-05 | 4.23E-02 | 4.08E-02 |
| MF       | GO:0033038 | bitter taste receptor activity           | 4/161     | 18/16969  | 2.15E-05 | 7.41E-03 | 7.28E-03 |
| MF       | GO:0008527 | taste receptor activity                  | 4/161     | 24/16969  | 7.15E-05 | 1.23E-02 | 1.21E-02 |
